1 **CK2 alpha prime and alpha-synuclein pathogenic functional interaction mediates**  
2 **synaptic dysregulation in Huntington's disease**

3

4 Dahyun Yu<sup>1,\*</sup>, Nicole Zarate<sup>1,\*</sup>, Angel White<sup>1</sup>, De'jah Coates<sup>1</sup>, Wei Tsai<sup>1</sup>, Carmen  
5 Nanclares<sup>1</sup>, Francesco Cuccu<sup>1,3</sup>, Johnny S. Yue<sup>1,4</sup>, Taylor G. Brown<sup>1</sup>, Rachel Mansky<sup>1</sup>,  
6 Kevin Jiang<sup>1</sup>, Hyuck Kim<sup>1#</sup>, Tessa Nichols-Meade<sup>1</sup>, Sarah N. Larson<sup>2</sup>, Katie Gundry<sup>2</sup>,  
7 Ying Zhang<sup>5</sup>, Cristina Tomas-Zapico<sup>6#</sup>, Jose J. Lucas<sup>6,7</sup>, Michael Benneyworth<sup>1</sup>, Gülin  
8 Öz<sup>2</sup>, Marija Cvetanovic<sup>1</sup>, Alfonso Araque<sup>1</sup> and Rocio Gomez-Pastor<sup>1±</sup>.

9

10 <sup>1</sup>Department of Neuroscience, School of Medicine, University of Minnesota,  
11 Minneapolis, MN, United States. <sup>2</sup>Center for Magnetic Resonance Research.  
12 Department of Radiology, School of Medicine, University of Minnesota, Minneapolis,  
13 MN, United States. <sup>3</sup>Department of Life and Environment Sciences, University of  
14 Cagliari, Cagliari, Italy. <sup>4</sup>Mounds View High School, Arden Hills, Minnesota. <sup>5</sup>Minnesota  
15 Supercomputing Institute, University of Minnesota, Minneapolis, MN, United States. <sup>6</sup>  
16 Centro de Biología Molecular 'Severo Ochoa' (CBMSO) CSIC/UAM, Madrid, Spain.  
17 <sup>7</sup>Networking Research Center on Neurodegenerative Diseases (CIBERNED), Instituto  
18 de Salud Carlos III, Madrid, Spain

19

20 #Current address: HK, MEPSGEN, Seoul 05836, South Korea. CTZ, Department of  
21 Functional Biology, Physiology, University of Oviedo, Asturias 33006, Spain; Health  
22 Research Institute of the Principality of Asturias (ISPA), Asturias 33011, Spain.

23

24 \*These authors contributed equally to the manuscript

25

26 ‡Correspondence should be addressed to Rocio Gomez-Pastor, University of  
27 Minnesota, 321 Church St. SE, Jackson Hall Room 6-145, Minneapolis, MN 55455,  
28 rgomezpa@umn.edu

29

30 **Keywords:** Huntington's disease, polyglutamine, CK2 alpha prime, alpha-synuclein,  
31 neuroinflammation, protein aggregation.

32

33 **Abstract**

34 **Background**

35 Huntington's Disease (HD) is a neurodegenerative disorder caused by a CAG  
36 trinucleotide repeat expansion in *the HTT* gene for which no therapies are available.  
37 This mutation causes HTT protein misfolding and aggregation, preferentially affecting  
38 medium spiny neurons (MSNs) of the basal ganglia. Transcriptional perturbations in  
39 synaptic genes and neuroinflammation are key processes that precede MSN  
40 dysfunction and motor symptom onset. Understanding the interplay between these

41 processes is crucial to develop effective therapeutic strategies to treat HD. We  
42 investigated whether protein kinase CK2 $\alpha'$ , a kinase upregulated in MSNs in HD and  
43 previously associated with Parkinson's disease (PD), participates in the regulation of  
44 neuroinflammation and synaptic function during HD progression.

## 45 **Methods**

46 We used the heterozygous knock-in zQ175 HD mouse model and compared that to  
47 zQ175 mice lacking one allele of CK2 $\alpha'$ . We performed neuropathological analyses  
48 using immunohistochemistry, cytokine proteome profiling, RNA-seq analyses in the  
49 striatum, electrophysiological recordings, and behavioral analyses. We also used the  
50 murine immortalized striatal cell lines *STHdh<sup>Q7</sup>* and *STHdh<sup>Q111</sup>* and studied the  
51 expression of various synaptic genes dysregulated by CK2 $\alpha'$ .

## 52 **Results**

53 We showed that CK2 $\alpha'$  haploinsufficiency in zQ175 mice ameliorated  
54 neuroinflammation, HTT aggregation, transcriptional alterations, excitatory synaptic  
55 transmission, and motor coordination deficits. RNA-seq analyses also revealed a  
56 connection between  $\alpha$ -syn, a protein associated with PD, and the transcriptional  
57 perturbations mediated by CK2 $\alpha'$  in HD. We also found increased  $\alpha$ -syn serine 129  
58 phosphorylation (pS129- $\alpha$ -syn), a post-translational modification linked to  $\alpha$ -  
59 synucleinopathy, in the nuclei of MSNs in zQ175 mice and in patients with HD. Levels of  
60 pS129- $\alpha$ -syn were ameliorated in zQ175 lacking one allele of CK2 $\alpha'$ .

## 61 **Conclusions**

62 Our data demonstrated that CK2 $\alpha'$  contributes to transcriptional dysregulation of  
63 synaptic genes and neuroinflammation in zQ175 mice and its depletion improved  
64 several HD-like phenotypes in this mouse model. These effects were related to  
65 increased phosphorylation of S129- $\alpha$ -syn in the striatum of HD mice, suggesting that  
66 CK2 $\alpha'$  contributes to worsening HD by mediating synucleinopathy. Our study highlights  
67 a possible convergent mechanism of neurodegeneration between HD and PD and  
68 suggests targeting CK2 $\alpha'$  as a potential therapeutic strategy to ameliorate synaptic  
69 dysfunction in HD as well as other neurodegenerative diseases.

70

## 71 **Introduction**

72 Huntington's disease (HD) is a neurodegenerative disorder that manifests with  
73 progressive motor, cognitive, and psychiatric deficits for which there is no cure. HD is  
74 caused by a poly-glutamine (polyQ) expansion in exon 1 of the Huntingtin (*HTT*) gene.  
75 This mutation results in progressive misfolding and aggregation of mutant HTT protein  
76 (mHTT) and preferentially affects GABAergic medium spiny neurons (MSNs) in the  
77 striatum (1-3). Transcriptional perturbations in synaptic genes and neuroinflammation  
78 are key processes that precede MSN death and motor symptom onset (4). However,  
79 our understanding of the interplay between these processes, mHTT aggregation, and  
80 their contributions to MSN susceptibility in HD is still incomplete.

81 Protein kinase CK2 is at the crossroads between neuroinflammation, protein  
82 aggregation, and synaptic activity, and has recently emerged as a potential therapeutic  
83 target of neurodegeneration (5-7). CK2 is a highly conserved serine/threonine kinase

84 composed of two regulatory beta (CK2 $\beta$ ) subunits and two catalytic subunits, alpha  
85 (CK2 $\alpha$ ) and alpha prime (CK2 $\alpha'$ ) (8, 9). The two catalytic subunits share high structural  
86 homology, but they differ in their tissue distribution and their ability to phosphorylate  
87 different substrates (10, 11). Our previous work showed that CK2 $\alpha'$ , but not CK2 $\alpha$ , is  
88 induced in HD MSNs and contributes to the dysregulation of protein quality control  
89 systems and HTT aggregation in cells and mouse models of HD (12, 13). However,  
90 other studies conducted *in vitro* have suggested a protective role of CK2 in HD via HTT  
91 phosphorylation (14, 15), imposing the necessity to clarify the specific involvement of  
92 CK2 $\alpha'$  in HD pathogenesis and its potential as a therapeutic target in HD.

93 CK2 is involved in the phosphorylation and aggregation of other pathological proteins  
94 like microtubule associated protein tau (MAPT) and alpha-synuclein ( $\alpha$ -syn), proteins  
95 involved in Alzheimer's (AD) and Parkinson's disease (PD) (16, 17). Phosphorylation of  
96 Tau and  $\alpha$ -syn contribute to the activation of neuroinflammatory processes,  
97 transcriptional dysregulation, and synaptic deficits in AD and PD (18, 19). Alterations in  
98 these proteins have also been associated with HD pathology (20-22). In particular,  
99 increased levels of  $\alpha$ -syn were observed in the plasma of patients with HD (23) and its  
100 deletion in R6/1 mice resulted in amelioration of motor deficits (20, 24). However, the  
101 mechanisms by which these proteins are altered in HD and the extent to which they  
102 contribute to HD pathophysiology are still unknown.

103 In this study, we characterized the role of CK2 $\alpha'$  in HD *in vivo* by using the  
104 heterozygous zQ175 HD mouse lacking one allele of CK2 $\alpha'$ . We showed that CK2 $\alpha'$   
105 haploinsufficiency decreased the levels of pro-inflammatory cytokines and improved  
106 astrocyte health, restored synaptic gene expression and excitatory synapse function,

107 and improved motor behavior in zQ175 mice. These neuropathological and phenotypic  
108 changes correlated with alterations in  $\alpha$ -syn serine 129 phosphorylation (pS129- $\alpha$ -syn)  
109 in the striatum, a post-translational modification involved in  $\alpha$ -synucleinopathy,  
110 establishing a novel connection between CK2 $\alpha'$  function and synucleinopathy in HD.  
111 Collectively, our data demonstrated that CK2 $\alpha'$  plays a negative role in HD and  
112 indicates the therapeutic potential of modulating CK2 $\alpha'$  to achieve enhanced neuronal  
113 function and neuroprotection.

114

## 115 **Results**

### 116 **Increased CK2 $\alpha'$ levels in the striatum of zQ175 mice parallel progressive HTT** 117 **aggregation and NeuN depletion**

118 Increased CK2 activity has been associated with detrimental effects in protein  
119 homeostasis and neuroinflammation in different neurodegenerative diseases, but its  
120 role in HD is still controversial (12, 14, 15). To determine whether CK2 $\alpha'$  plays a  
121 negative role during HD pathogenesis, we first evaluated the relationship between HTT  
122 aggregation, neuronal loss, and CK2 $\alpha'$  levels in the striatum over time for the  
123 heterozygous zQ175 mouse model at 3 (pre-symptomatic), 6 (early symptomatic), 12  
124 (symptomatic), and 22 months (late-stage disease) of age (25, 26). We observed an  
125 age-dependent increase of HTT aggregates (EM48<sup>+</sup> puncta) and fewer NeuN<sup>+</sup> neurons  
126 (pan-neuronal marker) in the striatum of zQ175 mice (**Fig. 1A-D, S1A-C**). Increased  
127 HTT aggregates were also seen over time in the cortex of zQ175 mice, but they were  
128 delayed and significantly lower than in the striatum (**Fig. S1A, B**), as previously

129 described (27). We confirmed that the depletion of NeuN<sup>+</sup> cells correlated with  
130 decreased Ctip2<sup>+</sup> neurons (MSN marker) (28)(**Fig. S1D-E**). However, we did not  
131 observe a significant difference in the total number of neurons, measured by cresyl  
132 violet (**Fig. S1F-H**), or in striatum volume (**Fig. S1I, J**), suggesting that changes in NeuN  
133 and Ctip2 reactivity may reflect transcriptional dysregulation and/or neuronal  
134 dysfunction rather than neuronal loss.

135 Due to the differences observed in the timing and level of HTT aggregation between  
136 striatum and cortex (**Fig. S1A, B**), we hypothesized that specific up-regulation of CK2 $\alpha'$   
137 in the striatum contributes to the enhanced accumulation of HTT aggregates in the  
138 striatum. The levels of CK2 $\alpha'$  increased over time in zQ175 mice in the striatum but not  
139 in the cortex (**Fig. 1E-G**), coinciding with the timing of HTT aggregation and preceding  
140 robust NeuN depletion in the striatum. Regression analysis demonstrated that CK2 $\alpha'$   
141 levels had a significant positive relationship with HTT aggregation (Pearson  $r(22)=0.87$ ,  
142  $p$  value $<0.001$ ) (**Fig. 1H**) and a significant negative relationship with the number of  
143 NeuN<sup>+</sup> cells (Pearson  $r(22)=-0.78$ ,  $p$  value $<0.001$ ) (**Fig. 1I**).

144

#### 145 **Depletion of CK2 $\alpha'$ improves neuronal function and motor coordination**

146 CK2 has been involved in the regulation of glutamate receptor trafficking via  
147 phosphorylation of receptor subunits as well as scaffolding proteins, suggesting a role of  
148 CK2 in neuronal signaling (29, 30). In addition, upregulation of the CK2 $\alpha'$  subunit in HD  
149 has been associated with alterations in MSN spine maturation and striatal synapse  
150 density in HD mice (12). Based on this evidence we decided to explore the functional

151 extent of CK2 $\alpha'$  in HD by using a zQ175 mouse model lacking one allele of CK2 $\alpha'$   
152 (zQ175:CK2 $\alpha'$ <sup>(+/-)</sup>) (12) (**Fig. 2A, B**). We first assessed MSNs abundance and striatal  
153 synaptic proteins expression (**Fig. S2A-C**). CK2 $\alpha'$  haploinsufficiency in zQ175 mice did  
154 not alter the number of MSNs (Ctip2<sup>+</sup> cells) or the mRNA levels of the MSN markers  
155 (Drd1 and Drd2), but increased the levels of synaptic proteins like the scaffold protein  
156 Dlg4 (PSD-95) and Ppp1rb1 (dopamine- and cAMP-regulated neuronal phosphoprotein  
157 DARPP-32), a key regulator of the electrophysiological responses in striatal neurons  
158 (32, 33) (**Fig. S2A-C**).

159 We then assessed the impact of CK2 $\alpha'$  depletion in AMPA-mediated excitatory  
160 transmission by conducting whole-cell patch clamp recordings from acute dorsolateral  
161 striatum coronal slices at 12 months (**Fig. 2C**). MSNs from all genotypes showed similar  
162 profiles in the analysis of basal synaptic transmission, including input/output curves,  
163 paired-pulse facilitation, and synaptic fatigue (**Fig. 2D-F**). We observed a trend towards  
164 increased normalized excitatory postsynaptic currents (EPSCs) in zQ175:CK2 $\alpha'$ <sup>(+/-)</sup> mice  
165 compared to the other two genotypes, but the data did not reach statistical significance  
166 (**Fig. 2F**). Spontaneous neurotransmitter release and synaptic activity via miniature  
167 EPSC (mEPSC) recordings showed that mEPSC amplitude, reflecting postsynaptic  
168 AMPA receptor function, was comparable among the 3 genotypes (**Fig. 2G**). However,  
169 mEPSC frequency, which reflects the probability of neurotransmitter release from  
170 presynaptic vesicles and also correlates with the number of synapses, was reduced in  
171 zQ175 mice (**Fig. 2H, I**), as previously reported (31), and rescued in zQ175:CK2 $\alpha'$ <sup>(+/-)</sup>.  
172 These data supported the role of CK2 $\alpha'$  in the dysregulation of striatal synaptic activity  
173 and excitability in HD mice.



174 Glutamatergic synaptic transmission is often related to motor and cognitive function in  
175 HD mouse models (33, 34). We conducted a series of motor tests including accelerating  
176 rotarod and beam walk in WT, zQ175, and zQ175:CK2 $\alpha^{'+/-}$  mice at 3, 6, and 12 months  
177 (**Fig. 3**). We also conducted cylinder and open field assessments on a different cohort  
178 at 12 months comparing zQ175 and zQ175:CK2 $\alpha^{'+/-}$  (**Fig. S3**). We did not observe  
179 significant differences between WT and zQ175 or between zQ175 and zQ175:CK2 $\alpha^{'+/-}$   
180 at any tested age in the accelerating rotarod test (**Fig. 3A-C**), open field, or cylinder test  
181 (**Fig. S3**). However, when we evaluated fine motor coordination and whole-body  
182 balance in the beam test, we observed a significant increase in foot slips of zQ175 mice  
183 compared to WT at 3 months, but only with the most challenging beam (small round),  
184 indicating early subtle motor deficits (**Fig. 3D**). At 12 months, zQ175 mice showed  
185 increased foot slips in both the small round and small square beams compared to WT,  
186 highlighting a worsening motor deficit (**Fig. 3F**). zQ175:CK2 $\alpha^{'+/-}$  mice showed a  
187 significant reduction in foot slips compared to zQ175 mice at all tested ages and no  
188 significant differences compared to WT.

189 We also performed tests to evaluate associative learning (fear conditioning), spatial  
190 learning and memory (Barnes maze, BM), cognitive flexibility (BM reversal), and spatial  
191 working memory (Y radial arm maze) by comparing zQ175 and zQ175:CK2 $\alpha^{'+/-}$  mice at  
192 12 months of age, but no significant differences were observed between the two groups  
193 (**Fig. S4**). This observation suggests that the positive effects of CK2 $\alpha'$  depletion on  
194 motor behavior may not additionally translate to improved cognitive functions.

195

196 **CK2 $\alpha'$  depletion rescued transcriptional dysregulation of genes involved in**  
197 **glutamatergic signaling**

198 We sought to determine whether depletion of CK2 $\alpha'$  levels had any influence in the  
199 overall transcriptional dysregulation characteristic of HD and whether those changes  
200 could be associated with the functional improvement observed in zQ175:CK2 $\alpha'$ <sup>(+/-)</sup> mice.  
201 We performed RNA-seq in the striatum of 12-14 month old mice, followed by Weighted  
202 Gene Co-Expression Network Analysis (WGCNA) to investigate which molecular  
203 pathways are affected by CK2 $\alpha'$  using n=5 mice/genotype for WT, zQ175, and  
204 zQ175:CK2 $\alpha'$ <sup>(+/-)</sup> and n=3 mice for CK2 $\alpha'$ <sup>(+/-)</sup>. We found that the mouse transcriptome  
205 could be clustered into 20 gene co-expression modules (**Fig. S5, Table S1**). Nine  
206 modules showed a significant difference in eigengene expression between zQ175 and  
207 WT in a Kruskal-Wallis test (p value < 0.05) (**Table S2, Fig. S6A**) and two modules  
208 (Greenyellow: 255 genes, and Red: 639 genes) were significantly different between  
209 zQ175 and zQ175:CK2 $\alpha'$ <sup>(+/-)</sup> mice (p value < 0.05) (**Fig. 4A, B, Table S2**). Cook's  
210 distance (DESeq2) analyses revealed that these differences were not due to the  
211 presence of outliers in our data set (**Fig. S6B**). We focused our analyses on the  
212 Greenyellow module due to its higher significance. Ingenuity pathway analysis (IPA)  
213 indicated that the five most significant pathways in the Greenyellow module were  
214 signaling pathways for synaptogenesis (p-value 1.68E-06), Ephrin A (p-value 7.84E-05),  
215 glutamate receptor (p-value 1.98E-04), axonal guidance (p-value 7.13E-04), and G-  
216 protein coupled receptor (GPCR) (p-value 1.14E-03) (**Fig. 4C**), all of which are  
217 pathways previously shown to be dysregulated in HD (35). IPA in the Red module also  
218 revealed synaptic signaling related pathways among their five most significant pathways

219 **(Fig. S6C)**. Additional Gene Ontology (GO) annotation of cellular components of the  
220 Greenyellow indicated that genes were enriched in synaptic components **(Fig. 4D)**.  
221 Connectivity analyses **(Fig. S6D)** revealed that the two most connected genes within  
222 the hub were Slit1 (Slit Guidance Ligand 1), associated with “poor” behavior and a  
223 worse prognosis in the R6/1 mouse model (36), and Ncald (Neurocalcin delta), which  
224 regulates multiple endocytosis-dependent neuronal functions and is situated on a locus  
225 that has been associated with earlier clinical onset of HD (37, 38). Differential Gene  
226 Expression (DGE) between WT and zQ175 mice confirmed a large transcriptional  
227 dysregulation (n=885 genes,  $Q < 0.1$ ) **(Fig. S6E, F, Table S3)**, as previously reported  
228 (35) while the DGE between zQ175:CK2 $\alpha'$ <sup>(+/-)</sup> and WT mice only reported 123 genes  
229 **(Fig. S6G, H)**. R package variance Partition confirmed that these expression changes  
230 were driven only by genotype and not by differences in sex distribution among our  
231 groups **(Fig. S6I)**.

232 CK2 has been previously associated with neuroinflammatory processes (6, 39), which  
233 was supported by the amelioration in the levels of inflammatory cytokines upon  
234 reduction of CK2 $\alpha'$  in both HD cells and mice **(Fig. S7A-D)**. Therefore, we examined our  
235 data set for microglial and astrocytic inflammatory RNA signatures (40) but did not  
236 observe significant changes in the expression of these gene signatures across  
237 genotypes **(Fig. 4E, F, Table S4, S5)**. Immunoblotting analyses of the microglial marker  
238 Iba1 (Ionized calcium binding adaptor molecule), considered a reactive marker of  
239 microgliosis, indicated an increase in total Iba1 protein levels between WT and the HD  
240 groups but immunohistological analyses of Iba1 showed no differences in the number or  
241 area size of Iba1<sup>+</sup> cells across all genotypes **(Fig. S7E-H)**, in line with the results

242 obtained by RNA-seq (**Fig. 4E**). The discrepancy between changes in protein levels of  
243 inflammatory cytokines and the absence of an inflammatory transcriptional signature  
244 could be related to post-translational events potentially regulated by CK2 $\alpha'$ . In addition,  
245 no changes in the RNA signature characteristic of reactive neurotoxic A1 astrocytes  
246 were seen across genotypes in our data set (**Fig. 4F**). The absence of robust microglial  
247 and astrocytic inflammatory RNA signatures in zQ175 and other HD models has  
248 previously been demonstrated (41). However, we recapitulated some transcriptional  
249 changes for the so called '*HD-associated astrocyte molecular signature*' (41, 42) (**Fig.**  
250 **4G**). Among all genes, zQ175 mice showed a significant decreased expression of  
251 *Snc4b*, *Penk*, *Pppp1r1b*, *Arpp19*, *Pcp4*, *Pcp41* and *Bcr*, compared to WT mice,  
252 indicative of astrocytic dysfunction (**Fig. 4G**). Notably, these changes were ameliorated  
253 when comparing zQ175:CK2 $\alpha'$ <sup>(+/-)</sup> and WT mice, suggesting diminished astrocytic  
254 pathology upon reduction of CK2 $\alpha'$  levels. These results were supported by the  
255 amelioration of astrogliosis (**Fig. S8A, B**) and the reduction in the astroglia marker myo-  
256 inositol, measured by *in vivo* proton magnetic resonance spectroscopy (<sup>1</sup>H-MRS) (25,  
257 43, 44), when comparing zQ175:CK2 $\alpha'$ <sup>(+/-)</sup> and zQ175 mice (**Fig. S8C-F**).

258 The DGEs analyzed between zQ175 and zQ175:CK2 $\alpha'$ <sup>(+/-)</sup> revealed 39 specific and  
259 significant genes (FDR<0.1) (CK2 $\alpha'$  RNA signature) (**Fig. 4H, Table S6**), which included  
260 *Csnk2a2* (CK2 $\alpha'$  gene) as a positive control. Three genes (*Ncald*, *Nrp2*, and *Slc30a3*)  
261 were also among the 15% most highly connected members of the Greenyellow module  
262 (**Fig. S6I**). At least 40% of the DGEs (n=16) were related to synaptic functions (**Table**  
263 **S6**). IPA on the 39 genes showed that the most significant canonical pathway was for  
264 glutamate receptor signaling (p-value 2.59E-03) (**Fig. 4I**), confirming the contribution of

265 CK2 $\alpha'$  to the dysregulation of genes related to excitatory synaptic transmission in  
266 HD. However, the available information for the regulation of the 39 gene set did not  
267 provide a direct connection between any of these hits and CK2 $\alpha$ , therefore suggesting  
268 additional regulators implicated in the CK2 $\alpha'$ -mediated RNA signature.

269

### 270 **$\alpha$ -syn participates in CK2 $\alpha'$ -mediated synaptic gene dysregulation**

271 When looking at the most significant upstream regulators identified by IPA of both the  
272 Greenyellow module and the 39 gene set identified by DGE, we found SNCA ( $\alpha$ -syn) (p-  
273 value 9.10E-11 and 1.03E-07, respectively).  $\alpha$ -syn regulates multiple processes  
274 including synaptic vesicle trafficking, neurotransmitter release and transcription (45, 46),  
275 and has been previously connected with CK2 (17, 47). IPA connected  $\alpha$ -syn with some  
276 of the most differentially dysregulated genes by CK2 $\alpha'$  including Ttr (Transthyretin),  
277 Grm2 (Glutamate Metabotropic Receptor 2), Slc17a7 (Solute Carrier Family 17 Member  
278 7; alias VGlut1), C1ql3 (Complement Component 1, Q Subcomponent-Like), Cckbr  
279 (cholecystokinin B receptor), Nrp2 (Neuropilin 2), and the transcription factors Tbr1 (T-  
280 Box Brain Transcription Factor 1) and Nr4a2 (Nuclear Receptor Subfamily 4 Group A  
281 Member 2; alias Nurr1) (**Fig. 5A**).

282 To determine the extent to which  $\alpha$ -syn participates in the regulation of genes identified  
283 in the CK2 $\alpha'$ -mediated RNA signature by IPA, we silenced or overexpressed SNCA in  
284 the murine striatal cell models Q7 (control) and Q111 (HD) cells. We first validated that  
285 Q111 cells presented similar gene expression alterations to those observed in zQ175  
286 mice for the putative SNCA targets when compared to Q7 cells (**Fig. 5B**). Slc30a3 was

287 included as a non-SNCA target control. Ttr expression was not detected in either Q7 or  
288 Q111. RT-qPCR showed a significant increase in Slc30a3, Slc17a7, Grm2, Cckbr, Tbr1  
289 and Nr4a2 in Q111 compared to Q7 as observed in zQ175 mice when compared with  
290 WT. Interestingly, SNCA transcripts in Q111 cells were significantly lower compared to  
291 Q7 (**Fig. 5B**). Silencing SNCA in Q111 cells significantly increased the expression of  
292 several putative SNCA targets; Slc17a7, Grm2, Cckbr, Tbr and C1ql3, but not the non-  
293 SNCA targeted control gene Slc30a3. No significant effects on Q7 cells were observed  
294 (**Fig. 5C-E**). On the contrary,  $\alpha$ -syn overexpression (OE) in Q111 cells had opposite  
295 effects on the same SNCA target genes with no effect on Q7 cells. We also conducted  
296 analyses in R6/1 and R6/1:SNCA<sup>KO</sup> mice compared to WT (**Fig. S9A, B**) (20). Although  
297 R6/1 mice did not show a similar transcriptional alteration for the SNCA target genes to  
298 that observed in zQ175, possibly due disease severity differences between these two  
299 mouse models, we observed significantly decreased SNCA transcripts in R6/1 mice  
300 compared to WT, as observed in Q111 compared to Q7 cells (**Fig. S9B**). We also  
301 observed that SNCA<sup>KO</sup> significantly altered the expression of Grm2 in the R6/1  
302 background but not in the WT background (**Fig. S9B**). Altogether, the effects mediated  
303 by SNCA manipulations suggested that transcriptional alterations of some synaptic  
304 genes in HD could be mediated by  $\alpha$ -syn dysregulation.

305

306 **Striatal synucleinopathy is found in zQ175 mice and is reduced by CK2 $\alpha$ '**  
307 **depletion**

308 We next explored whether CK2 $\alpha'$  was involved in the regulation of  $\alpha$ -syn in HD. We  
309 observed the total amount of  $\alpha$ -syn was similar between WT and zQ175 (**Fig. 6A-C**)  
310 mice. zQ175:CK2 $\alpha'$ <sup>(+/-)</sup> mice showed a trend towards increased  $\alpha$ -syn, but did not reach  
311 statistical significance (**Fig. 6B, C**). Nuclear and cytoplasmic fractionation confirmed the  
312 presence of  $\alpha$ -syn in nuclear fractions from striatum samples (45, 48), and showed a  
313 modest but significant increase in nuclear  $\alpha$ -syn in zQ175 mice (**Fig. 6D, E**). IF analyses  
314 for  $\alpha$ -syn and HTT (EM48) also confirmed the colocalization between these two  
315 proteins, as previously shown in R6/1 mice (20)(**Fig. 6F, G**). To determine if there was a  
316 difference in the number and distribution of co-localized  $\alpha$ -syn/HTT, we first analyzed  
317 the number of EM48<sup>+</sup> puncta in both the nucleus and cytoplasm between zQ175 and  
318 zQ175:CK2 $\alpha'$ <sup>(+/-)</sup> mice. Cytoplasmic HTT aggregates were reduced in zQ175:CK2 $\alpha'$ <sup>(+/-)</sup>  
319 compared to zQ175 mice, consistent with previous studies (12), although no significant  
320 differences were observed in the number of nuclear HTT aggregates (**Fig. 6H, I**).  
321 Despite the decrease in cytoplasmic HTT aggregates in zQ175:CK2 $\alpha'$ <sup>(+/-)</sup> mice, no  
322 significant differences were observed in the number of nuclear and/or cytoplasmic  $\alpha$ -  
323 syn/HTT colocalized puncta between zQ175 and zQ175:CK2 $\alpha'$ <sup>(+/-)</sup> mice (**Fig. 6J**).  
324 We then evaluated whether pS129- $\alpha$ -syn, a marker of synucleinopathy (49, 50), was  
325 altered in HD and whether CK2 $\alpha'$  could influence its levels. We observed that the levels  
326 of pS129- $\alpha$ -syn increased in the striatum of zQ175 mice at 12 months compared to WT  
327 (tested with 3 different pS129- $\alpha$ -syn antibodies: 81A, EP1536Y and D1R1R), and in the  
328 striatum of patients with HD (**Fig. 7A-E, Fig. S10A**), indicating signs of synucleinopathy.  
329 The levels of pS129- $\alpha$ -syn were significantly reduced in zQ175:CK2 $\alpha'$ <sup>(+/-)</sup> mice  
330 compared to zQ175, while no significant differences were observed with WT mice (**Fig.**

331 **7D, E, Fig. S10A-C).** pS129- $\alpha$ -syn was detected in both the cytoplasm and the nucleus  
332 of zQ175 striatal cells, while no nuclear presence was detected in zQ175:CK2 $\alpha'$ <sup>(+/-)</sup> mice  
333 (**Fig. 7F, G**). In addition, we observed that pS129- $\alpha$ -syn colocalized with both  
334 cytoplasmic and nuclear HTT puncta in zQ175 mice, while only cytoplasmic  
335 colocalization was observed in zQ175:CK2 $\alpha'$ <sup>(+/-)</sup> mice (**Fig. 7F, G, Suppl. Video 1**).

336

## 337 **Discussion**

338 Increased protein kinase CK2 activity has been associated with detrimental effects in  
339 protein homeostasis and neuroinflammation in different neurodegenerative diseases,  
340 including AD and PD (5). However, the role of CK2 in HD remained unclear. We  
341 previously showed that CK2 $\alpha'$  is induced in cell and mouse models of HD, in human  
342 iPSC-MSN like cells derived from patients with HD and in postmortem striatum from  
343 patients with HD (12). Increased CK2 was also reported in polyQ-HTT expressing cells  
344 and in the YAC128 HD mouse model (14). CK2 $\alpha'$  genetic knockdown in different HD cell  
345 models resulted in decreased HTT aggregation and increased cell viability (12) but  
346 other studies using CK2 inhibitors resulted in opposite results and suggested CK2 had a  
347 protective role in HD (14, 15). These contradictory data claimed a more in-depth  
348 characterization of the role of CK2 in HD. Here we have demonstrated the adverse  
349 effects of CK2 $\alpha'$  catalytic subunit on several HD-related phenotypes including  
350 transcriptional dysregulation, neuroinflammation, protein aggregation, neuronal function,  
351 and motor coordination in the zQ175 HD mouse model and consolidated the detrimental  
352 contribution of CK2 $\alpha'$  to HD pathogenesis. We found CK2 $\alpha'$  contribution is mediated, at



353 least in part, by the ability of CK2 $\alpha'$  to influence  $\alpha$ -syn phosphorylation, striatal  
354 synucleinopathy and synaptic gene dysregulation (**Fig. 7H**).

355 CK2 has been widely associated with the activation of neuroinflammatory processes  
356 (39, 51, 52). One of the proposed mechanisms is the participation of CK2 in the  
357 phosphorylation of components of the IKK (I $\kappa$ B kinase)/NF $\kappa$ B pathway that results in the  
358 production of proinflammatory cytokines (52). Studies in AD showed that CK2 is  
359 involved in the inflammatory response that occurs in astrocytes and demonstrated that  
360 pharmacological inhibition of CK2 reduced pro-inflammatory cytokine secretion by  
361 human astrocytes (6). Although the role of CK2 in inflammation is mostly attributed to  
362 the CK2 $\alpha$  subunit (39), we showed that CK2 $\alpha'$  haploinsufficiency reduced the levels of  
363 several proinflammatory cytokines and diminished astrogliosis in the striatum of zQ175  
364 mice. The benefits of reducing neuroinflammation in HD have been shown in R6/2 mice  
365 intracranially injected with a TNF- $\alpha$  inhibitor, which resulted in improved motor function  
366 (53). Similarly, CK2 $\alpha'$  haploinsufficiency in zQ175 resulted in improved motor  
367 coordination.

368 Despite the beneficial effects on neuroinflammation and motor behavior observed by  
369 reducing the levels of CK2 $\alpha'$  in zQ175 mice, our transcriptomic analyses did not reveal a  
370 neuroinflammatory transcriptional response (40) in either zQ175 or zQ175:CK2 $\alpha'$ <sup>(+/-)</sup>  
371 mice. This was also supported by the absence of a robust microgliosis phenotype in  
372 these mice. While the disconnection between changes in protein levels of inflammatory  
373 cytokines and the absence of an inflammatory transcriptional signature is intriguing,  
374 similar results have previously been shown in zQ175 and other HD mouse models like  
375 the R6/2 (41). Transcriptomic studies in these mice have instead revealed a

376 transcriptional signature related to astrocytic dysfunction (41). Our own RNA-seq data  
377 confirmed this HD astrocyte molecular signature manifested by the downregulation of  
378 several astrocyte-related genes including *Snc4b*, *Penk*, *Ppp1r1b* and *Arpp19*. We found  
379 that changes in CK2 $\alpha'$  levels influenced the expression of some of those genes  
380 associated with astrocytic dysfunction, suggesting a role of CK2 $\alpha'$  in HD-related  
381 astrocyte pathology.

382 Increased pro-inflammatory cytokines can alter synaptic strength as well as  
383 glutamatergic transmission and are also associated with structural and functional  
384 disruption of synaptic compartments (54). Similarly, astrocyte dysfunction in HD  
385 contributes to reduced striatal glutamatergic transmission and spine density, ultimately  
386 decreasing MSN excitability (55, 56). We showed that CK2 $\alpha'$  depletion increased the  
387 expression of synaptic proteins (PSD-95 and *Darpp-32*) and improved AMPA-mediated  
388 synaptic transmission. It is possible that these effects are mediated by an improved  
389 astrocyte health influenced by the reduction of CK2 $\alpha'$ . In support of this hypothesis,  
390 conditional deletion of mtHTT in astrocytes of BACHD mice improved astrocyte health  
391 and rescued the expression of synaptic proteins like PSD-95 and improved striatal  
392 synaptic activity (55). However, whether decreased astrocytic pathology contributes to  
393 improved neuronal activity in zQ175:CK2 $\alpha'$ ( $\pm$ ) mice is yet to be determined.

394 In contrast to CK2 $\alpha$ , which is an essential protein with hundreds of targets, CK2 $\alpha'$  has  
395 very few identified substrates (10, 57). Based on pharmacological studies, it was  
396 proposed that CK2 protected cells by mediating Ser13 and Ser16 HTT phosphorylation  
397 and decreasing HTT toxicity (14, 15, 58), but genetic evidence for the direct role of CK2  
398 (either CK2 $\alpha$  or CK2 $\alpha'$  subunits) has never been shown. Previously used CK2 inhibitors

399 were characterized by their high toxicity and poor selectivity with capacity to potentially  
400 inhibit other kinases (59, 60). This could explain indirect effects on HTT phosphorylation  
401 and decreased cell viability when used in HD cells (14, 15). In addition, the N-terminal  
402 sequence of HTT (KAFES<sub>13</sub>LKS<sub>16</sub>FQQQ) lacks the CK2 consensus sequence (SxxE/D)  
403 (10, 57). A recent kinase screening has revealed that other kinases like TBK1 are most  
404 likely to be involved in HTT phosphorylation than CK2 (61). Although we cannot rule out  
405 potential indirect effects of CK2 $\alpha'$  on HTT phosphorylation in zQ175 mice, we showed  
406 that genetic reduction of CK2 $\alpha'$  levels in both HD cells (12) and mouse models  
407 decreased HTT aggregation and toxicity, which is contrary to what would be expected if  
408 CK2 $\alpha'$  participates in HTT phosphorylation.

409 On the other hand, we previously showed CK2 $\alpha'$  directly phosphorylates the stress  
410 protective transcription factor HSF1, which regulates protein homeostasis (13), signaling  
411 HSF1 for proteasomal degradation and influencing chaperone expression in HD (12).  
412 Our RNA-seq analysis validated the increased expression of chaperones like Hsp70  
413 and Hsp25 in zQ175:CK2 $\alpha'$ <sup>(+/-)</sup> mice, consistent with previous findings (12). However,  
414 WGCNA and DGE did not reveal global changes in transcriptional pathways associated  
415 with protein quality control networks in zQ175:CK2 $\alpha'$ <sup>(+/-)</sup> mice, but instead showed a  
416 unique CK2 $\alpha'$ -mediated RNA signature related to synaptogenesis and glutamate  
417 receptor signaling. This data correlated with the improved frequency of striatal mEPSCs  
418 observed by reducing CK2 $\alpha'$  levels and supports previous findings showing increased  
419 MSNs maturation and striatal synapse density in zQ175:CK2 $\alpha'$ <sup>(+/-)</sup> mice (12, 62).  $\alpha$ -syn  
420 was shown by IPA as one of the top putative upstream regulators of the CK2 $\alpha'$ -  
421 mediated transcriptional changes. Although  $\alpha$ -syn is not a transcription factor, several

422 reports showed  $\alpha$ -syn modulates transcription by either regulating the expression of  
423 transcription factors like Nurr1 (45, 46), which is differentially expressed between zQ175  
424 and zQ175:CK2 $\alpha'$ <sup>(+/-)</sup>, or by inducing epigenetic modifications in the DNA (63).

425 Interestingly, mice expressing human  $\alpha$ -syn selectively altered glutamate receptor  
426 signaling genes at both the epigenetic and transcriptional level (63), which supports the  
427 hypothesis that CK2 $\alpha'$ -mediated alterations in glutamatergic signaling could be  $\alpha$ -syn  
428 dependent.

429  $\alpha$ -Syn participates in HD pathogenesis since  $\alpha$ -syn KO mice decreased mtHTT  
430 aggregation and attenuated body weight loss and motor symptoms in R6/1 mice (20,  
431 64), although its specific mechanism of action in HD was not established. Aggregation of  
432  $\alpha$ -syn and consequent synucleinopathy in PD were linked to CK2-dependent  
433 phosphorylation of S129- $\alpha$ -syn (YEMPS<sub>129</sub>EEG), although this site is also the target of  
434 other protein kinases (47, 65). Here, we showed that pS129- $\alpha$ -syn levels are increased  
435 in the striatum of symptomatic HD mice and patients with HD as well as increased  
436 pS129- $\alpha$ -syn localization in the MSN nucleus. pS129- $\alpha$ -syn was decreased when  
437 reducing the levels of CK2 $\alpha'$ . Increased pS129- $\alpha$ -syn in cortical neurons of aged mice  
438 has been correlated with the dysregulation of vesicular glutamate transporter Slc17a7  
439 (66), which is also seen in zQ175 mice. Considering all the evidence, it is reasonable to  
440 hypothesize that CK2 $\alpha'$ -mediated increase of pS129- $\alpha$ -syn in the brains of zQ175 mice  
441 could contribute to glutamate signaling dysregulation by altering (directly or indirectly)  
442 the expression of genes related to those processes and ultimately affecting several HD-  
443 like phenotypes. However, we cannot disregard the possibility that the effects mediated  
444 by CK2 $\alpha'$  depletion could be additionally influenced by other CK2 $\alpha'$  substrates. Further

445 experiments will be necessary to decipher the mechanism by which CK2 $\alpha'$ -mediated  $\alpha$ -  
446 synucleinopathy contributes to HD and to tease apart the differential contribution of HTT  
447 aggregation and  $\alpha$ -syn pathology to the symptomatology, onset, and progression of HD.

448

## 449 **Materials and Methods**

450 See SI Appendix for complete methods.

451

### 452 **Cell lines**

453 Mammalian cell lines used in this study were the mouse-derived striatal cells STHdh<sup>Q7</sup>  
454 and STHdh<sup>Q111</sup> (Coriell Cell Repositories). Cells were grown at 33°C in Dulbecco's  
455 modified Eagle's medium (DMEM, Genesee) supplemented with 10% fetal bovine  
456 serum (FBS), 100 U ml<sup>-1</sup> penicillin/streptomycin and 100 ug ml<sup>-1</sup> G418 (Gibco), as  
457 previously described (12).

458

### 459 **Mouse strains**

460 For this study we used a full-length knock-in mouse model of HD known as zQ175 on  
461 the C57BL/6J background (Stock No. 027410). CK2 $\alpha'$  heterozygous mice (CK2 $\alpha'$ <sup>(+/-)</sup>) on  
462 the 129/SvEv-C57BL/6J background (Taconic Biosciences TF3062) were originally  
463 obtained from Dr. Seldin (Boston University) (67). All mice were housed under standard  
464 SPF conditions. We also used 5-month WT (mixed background CBA x C57BL/6), R6/1,

465 SNCA<sup>KO</sup>, and R6/1SNCA<sup>KO</sup> obtained from Dr. Lucas. All animal care and sacrifice  
466 procedures were approved by the University of Minnesota Institutional Animal Care and  
467 Use Committee (IACUC) in compliance with the National Institutes of Health guidelines  
468 for the care and use of laboratory animals under the approved animal protocol 2007-  
469 38316A.

470

#### 471 **siRNA transfection, RNA preparation and RT-qPCR**

472 For CK2 $\alpha$ ' knock-down, *STHdh* cells were transfected with FlexiTube siRNA (5 nmol)  
473 from Qiagen (Mm\_Csnk2a2; SI00961051; SI00961058; SI00961065; SI00961072)  
474 using DharmaFECT1 per manufacturer's guidelines. As a negative control, ON-  
475 TARGETplus control Non-targeting pool siRNA (Dharmacon) was used. Cells were  
476 collected 24 h after transfection. RNA was extracted from *STHdh* cells and mouse  
477 striatal tissues by using the RNeasy extraction kit (Qiagen) according to the  
478 manufacturer's instructions. cDNA for all was prepared using the Superscript First  
479 Strand Synthesis System (Invitrogen). SYBR green based PCR was performed with  
480 SYBR mix (Roche). The qPCR amplification was performed using the LightCycler 480  
481 System (Roche). Each sample was tested in triplicate and normalized to GAPDH  
482 levels.

#### 483 **Immunoblot analysis**

484 Sample preparation and immunoblotting condition were performed as previously  
485 described (12). Striatum protein extracts from one hemisphere of mice were prepared in  
486 cell lysis buffer (25 mM Tris pH 7.4, 150 mM NaCl, 1 mM EDTA, 1% Triton-X100 and

487 0.1% SDS). Primary antibodies were anti-CK2 $\alpha'$  (Novus NB100-379 and Proteintech  
488 10606-1-AP), anti-Iba1 (FUJIFILM Wako 019-19741),  $\alpha$ -syn (Biolegend 834303 clone  
489 4D6), pS129- $\alpha$ -syn (Millipore MABN826, clone 81A and Abcam ab51253, EP1536Y),  
490 GAPDH (Santacruz sc-365062). Quantitative analyses were performed using ImageJ  
491 software and normalized to GAPDH controls.

492

### 493 **Immunohistochemistry**

494 Sample preparation was performed as previously described (12). Fluorescent images  
495 were acquired on an epi-fluorescent microscope (Echo Revolve) or confocal microscope  
496 (Olympus FV1000). Primary antibodies used are as follows:  $\alpha$ -syn (Biolegend 834303),  
497 pS129- $\alpha$ -syn (Millipore MABN826 and Cell signaling technology 23076S, D1R1R),  
498 CK2 $\alpha'$  (Proteintech 10606-1-AP), Ctip2 (Abcam ab18465), C3d (R&D Systems  
499 AF2655), GFAP (Invitrogen PA1-10019), S100b (Abcam ab41548), GS (BD  
500 Biosciences 610517 and Abcam 49873), HTT (Millipore, clone mEM48 Mab5374, and  
501 Abcam ab109115), Iba1 (FUJIFILM Wako 019-19741), NeuN (Millipore MAB377), IL-6  
502 (Santa Cruz Bio sc-32296). For cell number (Ctip, GS, NeuN, Iba1, DAPI), the Cell  
503 counter plugin from ImageJ software was used and normalized to the image area  
504 ( $300\mu\text{m}^2$ ). EM48 $^+$  and  $\alpha$ -syn puncta were counted using annotations in the Echo  
505 Revolve software and using the Puncta Analyzer plugin in ImageJ.

506

### 507 **Nuclear/Cytoplasm fractionation**

508

509 Frozen striatum samples (~20 mg) were fractionated using the Minute™ Cytosolic and  
510 Nuclear Extraction Kit for Frozen/Fresh tissues (Invent Biotechnologies INC, Cat NT-  
511 032) as per Manufacturer's instructions.

512

### 513 **Electrophysiological analyses**

514 Acute dorsolateral striatum coronal slices (350  $\mu\text{m}$  thick) were obtained from 12 months  
515 old mice using a vibratome, and processed as previously described (68). Researchers  
516 were blind to the mouse genotype. The brain was quickly removed after decapitation  
517 and placed in ice-cold artificial cerebrospinal fluid (ACSF) containing (in mM): NaCl 124,  
518 KCl 2.69,  $\text{KH}_2\text{PO}_4$  1.25,  $\text{MgSO}_4$  2,  $\text{NaHCO}_3$  26,  $\text{CaCl}_2$  2, ascorbic acid 0.4, and glucose  
519 10, and continuously bubbled with carbogen (95%  $\text{O}_2$  and 5%  $\text{CO}_2$ ) (pH 7.4). For  
520 excitatory postsynaptic currents (EPSCs) picrotoxin (50  $\mu\text{M}$ ) and CGP54626 (1  $\mu\text{M}$ )  
521 were added. Whole-cell electrophysiological recordings were obtained using patch  
522 electrodes (3–10  $\text{M}\Omega$ ) filled with an internal solution containing (in mM):  $\text{KMeSO}_4$  135,  
523 KCl 10, HEPES-K 10, NaCl 5, ATP-Mg 2.5, GTP-Na 0.3 (pH 7.3). Membrane potentials  
524 were held at  $-70$  mV. For EPSCs, theta capillaries filled with ACSF were used for  
525 bipolar stimulation. Input–output curves of EPSCs were made by increasing stimulus  
526 intensities from 0 to 100  $\mu\text{A}$ . Paired-pulse facilitation was done by applying paired  
527 pulses (2 ms duration) with 25, 50, 75, 100, 200, 300, and 500 ms inter-pulse intervals.  
528 The paired-pulse ratio was calculated by dividing the amplitude of the second EPSC by  
529 the first ( $\text{PPR}=\text{EPSC-2}/\text{EPSC-1}$ ). Synaptic fatigue was assessed by applying 30



530 consecutive stimuli in 15 ms intervals. For miniature EPSCs (mEPSCs) tetrodotoxin  
531 (TTX; 1  $\mu$ M) was added to the solution.

532

### 533 **Behavioral assays**

534 Sample sizes were calculated using GraphPad Prism 9.0 and GPower 3.1 to detect  
535 differences between WT versus zQ175 groups with a power of  $\geq 0.8$ . Researchers at  
536 the Mouse Behavioral core at University of Minnesota were blinded to the genotypes of  
537 the mice during testing. See **Supplementary Methods** for a complete description of all  
538 behavioral tests conducted in the study. *Beam Walk*: 19-mm (medium-round) or 10-mm  
539 (small-round) diameter and 16-mm (medium-Square) or 10-mm (small-Square) width of  
540 3 feet long wood beams (made in house) were used. Each mouse was placed on the  
541 beam at one end and allowed to walk to the goal box. Foot slips were recorded  
542 manually when the hind paws slipped off the beam. Testing included 3 training days and  
543 1 test day with 4 consecutive trials each. *Rotarod*: Mice were tested over 3 consecutive  
544 days. Each daily session included 3 consecutive accelerating trials of 5 min on the  
545 rotarod apparatus (Ugo Basile) with the rotarod speed changing from 5 to 50 RPM over  
546 300 s, with an inter-trial interval of at least 15 min.

547

### 548 **RNA-Seq Analyses**

549 Gene expression analysis was carried out using the CHURP pipeline  
550 ([HTTps://doi.org/10.1145/3332186.3333156](https://doi.org/10.1145/3332186.3333156)) using n=5 mice/genotype for WT, zQ175,

551 and zQ175:CK2 $\alpha^{(+/-)}$  and n=3 mice for CK2 $\alpha^{(+/-)}$ , with a female (F)/male (M) ratio:  
552 4F/1M WT, 1F/2M CK2 $\alpha^{(+/-)}$ , 2F/3M zQ175, 4F/1M zQ175:CK2 $\alpha^{(+/-)}$ . Differential gene  
553 expression was determined with DESeq2 using default setting (PMID: 25516281).  
554 Genes with a q < 0.1 were considered significant. Outliers' identification was performed  
555 using Cook's distance (DESeq2). Driver factors of gene expression variance (genotype  
556 and/or sex) were evaluated using R package variance Partition. Pathway and clustering  
557 analysis were completed with IPA (Ingenuity Systems: RRID: SCR\_008653) and  
558 gProfiler2 (PMID: 31066453). Data visualization was done using various R graphic  
559 packages, including ggplot2, ggraph, and DESeq2 visualization functions. The RNA-seq  
560 data set generated in this manuscript has been deposited at GEO (accession number  
561 GSE160586). Reviewer token "**gpqrigisbxgprqf**".

562

### 563 **WGCNA Analysis**

564 The count-based gene expressions were first transformed using a variance stabilizing  
565 method via DESeq2 vst function (69). The WGCNA R package (v1.69) was used to  
566 construct an unsigned gene co-expression network with a soft threshold power [beta] of  
567 6. We used a non-parametric Kruskal-Wallis test (p value < 0.05) to identify modules  
568 that differed significantly among different genotypes. Data for the Greenyellow module  
569 was exported using a Cytoscape format for visualization. Network figures are limited to  
570 the top 15% of genes with the strongest network connections. The size of the circles is  
571 scaled by the absolute value of the mean log2 fold change between zQ175 and  
572 zQ175:CK2 $\alpha^{(+/-)}$  mice.

573

## 574 **Quantification and Statistical analyses**

575 Data are expressed as Mean  $\pm$  SEM, Mean  $\pm$  SD, or percentage, analyzed for statistical  
576 significance, and displayed by Prism 8 software (GraphPad, San Diego, CA) or Excel  
577 software (Microsoft). Pearson correlation tests were applied to test the normal  
578 distribution of experimental data. Normal distributions were compared with Student t-  
579 test (two-tailed or one-tailed), Welch's t-test or ANOVA with appropriate post-hoc tests  
580 (Sidak's, Dunn's, or Tukey's) for multiple comparisons. The accepted level of  
581 significance was  $p \leq 0.05$ . Statistical analyses for electrophysiological experiments were  
582 performed with SigmaPlot 13.0 software. No statistical methods were used to  
583 predetermine sample sizes, but sample sizes were chosen to be similar to those  
584 reported in previous publications (11).

585

## 586 **Acknowledgements**

587 We are grateful to Drs. Sylvain Lesne and Michael Lee for sharing their expertise on  
588 alpha-synuclein and sharing reagents, Maha Syed and Joyce Meints for technical  
589 assistance, Jason Mitchell for assistance with confocal microscopy and Erin Greguske  
590 for proofreading.

591

## 592 **Authors' contributions**

593 R.G.P obtained funding for the study and designed the experiments. D.Y, N.Z, F.C, J.Y,  
594 T.B, W.T, K.J, T.S.M, K.G, S.L, A.W, D.C, R.M performed the experiments. C.T.Z  
595 prepared SNCA<sup>KO</sup> tissues. Y.Z conducted RNA-seq analyses. D.Y, N.Z, R.M, S.L, K.G,  
596 C.N, W.T and R.G.P prepared and analyzed the data. G.O supervised the MR data  
597 acquisition and analysis. M.B supervised mouse behavioral data analysis. A.A  
598 supervised electrophysiological recordings. M.C supervised microglia analyses. J.J.L  
599 supervised SNCA<sup>KO</sup> tissue preparation. R.G.P wrote the first draft of the manuscript and  
600 all authors edited subsequent versions and approved the final version of the manuscript.

601

## 602 **Funding**

603 This work was supported by the Biomedical Research Awards for Interdisciplinary New  
604 Science BRAINS (to R.G.P) and the National Institute of Health NINDS (R01  
605 NS110694-01A1) (to R.G.P). The Center for Magnetic Resonance Research is  
606 supported by the National Institute of Biomedical Imaging and Bioengineering (NIBIB)  
607 grant P41 EB027061, the Institutional Center Cores for Advanced Neuroimaging award  
608 P30 NS076408 and the W.M. Keck Foundation. F.C. was supported by the GLOBUS  
609 Placement program. National Institute of Health NINDS (R01 NS197387) (to M.C.) and  
610 National Institute of Health NINDS R01 MH119355 and R01 NS108686 (to A.A). Grants  
611 from Fundación Ramón Areces, MICINN (SAF2009-08233) and MCIU/AEI/FEDER-UE  
612 (RTI2018-096322-B-100) to J.J.L.

613

## 614 **Data availability**

615 RNA-seq data set generated in this manuscript is accessible at GEO (accession  
616 number GSE160586). All other data generated or analyzed during this study are  
617 included in this published article (and its supplementary information files).

618

## 619 **Declaration of interest**

620 The authors declare no competing interests.

621

## 622 **References**

623

- 624 1. Group THsDCR. A novel gene containing a trinucleotide repeat that is expanded  
625 and unstable on Huntington's disease chromosomes. *Cell*. 1993;72(6):971-83.
- 626 2. DiFiglia M, Sapp E, Chase KO, Davies SW, Bates GP, Vonsattel JP, et al.  
627 Aggregation of huntingtin in neuronal intranuclear inclusions and dystrophic neurites in  
628 brain. *Science*. 1997;277(5334):1990-3.
- 629 3. Ferrante RJ, Kowall NW, Richardson EP. Proliferative and degenerative changes  
630 in striatal spiny neurons in Huntington's disease: a combined study using the section-  
631 Golgi method and calbindin D28k immunocytochemistry. *J Neurosci*. 1991;11(12):3877-  
632 87.
- 633 4. Crotti A, Glass CK. The choreography of neuroinflammation in Huntington's  
634 disease. *Trends Immunol*. 2015;36(6):364-73.

- 635 5. Castello J, Ragnauth A, Friedman E, Rebholz H. CK2-An Emerging Target for  
636 Neurological and Psychiatric Disorders. *Pharmaceuticals (Basel)*. 2017;10(1).
- 637 6. Rosenberger AF, Morrema TH, Gerritsen WH, van Haastert ES, Snkhchyan H,  
638 Hilhorst R, et al. Increased occurrence of protein kinase CK2 in astrocytes in  
639 Alzheimer's disease pathology. *JNeuroinflammation*. 2016;13(1):4.
- 640 7. Borgo C, D'Amore C, Sarno S, Salvi M, Ruzzene M. Protein kinase CK2: a  
641 potential therapeutic target for diverse human diseases. *Signal Transduct Target Ther*.  
642 2021;6(1):183.
- 643 8. Pinna LA. Protein kinase CK2: a challenge to canons. *JCell Sci*. 2002;115(Pt  
644 20):3873-8.
- 645 9. Litchfield DW. Protein kinase CK2: structure, regulation and role in cellular  
646 decisions of life and death. *BiochemJ*. 2003;369(Pt 1):1-15.
- 647 10. Bian Y, Ye M, Wang C, Cheng K, Song C, Dong M, et al. Global screening of  
648 CK2 kinase substrates by an integrated phosphoproteomics workflow. *SciRep*.  
649 2013;3:3460.
- 650 11. Ceglia I, Flajolet M, Rebholz H. Predominance of CK2 $\alpha$  over CK2 $\alpha'$  in the  
651 mammalian brain. *Mol Cell Biochem*. 2011;356(1-2):169-75.
- 652 12. Gomez-Pastor R, Burchfiel ET, Neef DW, Jaeger AM, Cabiscol E, McKinstry SU,  
653 et al. Abnormal degradation of the neuronal stress-protective transcription factor HSF1  
654 in Huntington's disease. *Nat Commun*. 2017;8:14405.
- 655 13. Gomez-Pastor R, Burchfiel ET, Thiele DJ. Regulation of heat shock transcription  
656 factors and their roles in physiology and disease. *Nat Rev Mol Cell Biol*. 2018.

- 657 14. Fan MM, Zhang H, Hayden MR, Pelech SL, Raymond LA. Protective up-  
658 regulation of CK2 by mutant huntingtin in cells co-expressing NMDA receptors. *J*  
659 *Neurochem.* 2008;104(3):790-805.
- 660 15. Atwal RS, Desmond CR, Caron N, Maiuri T, Xia J, Sipione S, et al. Kinase  
661 inhibitors modulate huntingtin cell localization and toxicity. *NatChemBiol.* 2011;7(7):453-  
662 60.
- 663 16. Greenwood JA, Scott CW, Spreen RC, Caputo CB, Johnson GV. Casein kinase  
664 II preferentially phosphorylates human tau isoforms containing an amino-terminal insert.  
665 Identification of threonine 39 as the primary phosphate acceptor. *J Biol Chem.*  
666 1994;269(6):4373-80.
- 667 17. Waxman EA, Giasson BI. Specificity and regulation of casein kinase-mediated  
668 phosphorylation of alpha-synuclein. *J Neuropathol Exp Neurol.* 2008;67(5):402-16.
- 669 18. Ising C, Venegas C, Zhang S, Scheiblich H, Schmidt SV, Vieira-Saecker A, et al.  
670 NLRP3 inflammasome activation drives tau pathology. *Nature.* 2019;575(7784):669-73.
- 671 19. Masliah E, Rockenstein E, Veinbergs I, Mallory M, Hashimoto M, Takeda A, et al.  
672 Dopaminergic loss and inclusion body formation in alpha-synuclein mice: implications  
673 for neurodegenerative disorders. *Science.* 2000;287(5456):1265-9.
- 674 20. Tomás-Zapico C, Díez-Zaera M, Ferrer I, Gómez-Ramos P, Morán MA, Miras-  
675 Portugal MT, et al.  $\alpha$ -Synuclein accumulates in huntingtin inclusions but forms  
676 independent filaments and its deficiency attenuates early phenotype in a mouse model  
677 of Huntington's disease. *Hum Mol Genet.* 2012;21(3):495-510.

- 678 21. Fernández-Nogales M, Cabrera JR, Santos-Galindo M, Hoozemans JJ, Ferrer I,  
679 Rozemuller AJ, et al. Huntington's disease is a four-repeat tauopathy with tau nuclear  
680 rods. *Nat Med.* 2014;20(8):881-5.
- 681 22. Liu P, Smith BR, Montonye ML, Kemper LJ, Leinonen-Wright K, Nelson KM, et  
682 al. A soluble truncated tau species related to cognitive dysfunction is elevated in the  
683 brain of cognitively impaired human individuals. *Sci Rep.* 2020;10(1):3869.
- 684 23. Breza M, Emmanouilidou E, Leandrou E, Kartanou C, Bougea A, Panas M, et al.  
685 Elevated Serum  $\alpha$ -Synuclein Levels in Huntington's Disease Patients. *Neuroscience.*  
686 2020;431:34-9.
- 687 24. Corrochano S, Renna M, Carter S, Chrobot N, Kent R, Stewart M, et al.  $\alpha$ -  
688 Synuclein levels modulate Huntington's disease in mice. *Hum Mol Genet.*  
689 2012;21(3):485-94.
- 690 25. Heikkinen T, Lehtimäki K, Vartiainen N, Puoliväli J, Hendricks SJ, Glaser JR, et  
691 al. Characterization of neurophysiological and behavioral changes, MRI brain volumetry  
692 and <sup>1</sup>H MRS in zQ175 knock-in mouse model of Huntington's disease. *PLoS One.*  
693 2012;7(12):e50717.
- 694 26. Menalled LB, Kudwa AE, Miller S, Fitzpatrick J, Watson-Johnson J, Keating N, et  
695 al. Comprehensive behavioral and molecular characterization of a new knock-in mouse  
696 model of Huntington's disease: zQ175. *PLoS One.* 2012;7(12):e49838.
- 697 27. Carty N, Berson N, Tillack K, Thiede C, Scholz D, Kottig K, et al. Characterization  
698 of HTT inclusion size, location, and timing in the zQ175 mouse model of Huntington's  
699 disease: an in vivo high-content imaging study. *PLoS One.* 2015;10(4):e0123527.



- 700 28. Arlotta P, Molyneaux BJ, Jabaudon D, Yoshida Y, Macklis JD. Ctip2 controls the  
701 differentiation of medium spiny neurons and the establishment of the cellular  
702 architecture of the striatum. *J Neurosci*. 2008;28(3):622-32.
- 703 29. Chung HJ, Huang YH, Lau LF, Huganir RL. Regulation of the NMDA receptor  
704 complex and trafficking by activity-dependent phosphorylation of the NR2B subunit PDZ  
705 ligand. *J Neurosci*. 2004;24(45):10248-59.
- 706 30. Sanz-Clemente A, Matta JA, Isaac JT, Roche KW. Casein kinase 2 regulates the  
707 NR2 subunit composition of synaptic NMDA receptors. *Neuron*. 2010;67(6):984-96.
- 708 31. Indersmitten T, Tran CH, Cepeda CT, Levine MS. Altered Excitatory and  
709 Inhibitory Inputs to Striatal Medium-Sized Spiny Neurons and Cortical Pyramidal  
710 Neurons in the Q175 Mouse Model of Huntington's Disease. *JNeurophysiol*. 2015;jn.
- 711 32. Fienberg AA, Hiroi N, Mermelstein PG, Song W, Snyder GL, Nishi A, et al.  
712 DARPP-32: regulator of the efficacy of dopaminergic neurotransmission. *Science*.  
713 1998;281(5378):838-42.
- 714 33. Vezzoli E, Caron I, Talpo F, Besusso D, Conforti P, Battaglia E, et al. Inhibiting  
715 pathologically active ADAM10 rescues synaptic and cognitive decline in Huntington's  
716 disease. *J Clin Invest*. 2019;129(6):2390-403.
- 717 34. Smith-Dijak AI, Sepers MD, Raymond LA. Alterations in synaptic function and  
718 plasticity in Huntington disease. *J Neurochem*. 2019;150(4):346-65.
- 719 35. Langfelder P, Cattle JP, Chatzopoulou D, Wang N, Gao F, Al-Ramahi I, et al.  
720 Integrated genomics and proteomics define huntingtin CAG length-dependent networks  
721 in mice. *Nat Neurosci*. 2016;19(4):623-33.

- 722 36. Gallardo-Orihuela A, Hervás-Corpión I, Hierro-Bujalance C, Sanchez-Sotano D,  
723 Jiménez-Gómez G, Mora-López F, et al. Transcriptional correlates of the pathological  
724 phenotype in a Huntington's disease mouse model. *Sci Rep.* 2019;9(1):18696.
- 725 37. Consortium GMoHsDG-H. Identification of Genetic Factors that Modify Clinical  
726 Onset of Huntington's Disease. *Cell.* 2015;162(3):516-26.
- 727 38. Riessland M, Kaczmarek A, Schneider S, Swoboda KJ, Löhr H, Bradler C, et al.  
728 Neurocalcin Delta Suppression Protects against Spinal Muscular Atrophy in Humans  
729 and across Species by Restoring Impaired Endocytosis. *Am J Hum Genet.*  
730 2017;100(2):297-315.
- 731 39. Singh NN, Ramji DP. Protein kinase CK2, an important regulator of the  
732 inflammatory response? *J Mol Med (Berl).* 2008;86(8):887-97.
- 733 40. Liddel SA, Guttenplan KA, Clarke LE, Bennett FC, Bohlen CJ, Schirmer L, et  
734 al. Neurotoxic reactive astrocytes are induced by activated microglia. *Nature.*  
735 2017;541(7638):481-7.
- 736 41. Diaz-Castro B, Gangwani MR, Yu X, Coppola G, Khakh BS. Astrocyte molecular  
737 signatures in Huntington's disease. *Sci Transl Med.* 2019;11(514).
- 738 42. Al-Dalahmah O, Sosunov AA, Shaik A, Ofori K, Liu Y, Vonsattel JP, et al. Single-  
739 nucleus RNA-seq identifies Huntington disease astrocyte states. *Acta Neuropathol*  
740 *Commun.* 2020;8(1):19.
- 741 43. Tkac I, Henry PG, Zacharoff L, Wedel M, Gong W, Deelchand DK, et al.  
742 Homeostatic adaptations in brain energy metabolism in mouse models of Huntington  
743 disease. *J Cereb Blood Flow Metab.* 2012;32(11):1977-88.

- 744 44. Peng Q, Wu B, Jiang M, Jin J, Hou Z, Zheng J, et al. Characterization of  
745 Behavioral, Neuropathological, Brain Metabolic and Key Molecular Changes in zQ175  
746 Knock-In Mouse Model of Huntington's Disease. *PLoS One*. 2016;11(2):e0148839.
- 747 45. Davidi D, Schechter M, Elhadi SA, Matatov A, Nathanson L, Sharon R.  $\alpha$ -  
748 Synuclein Translocates to the Nucleus to Activate Retinoic-Acid-Dependent Gene  
749 Transcription. *iScience*. 2020;23(3):100910.
- 750 46. Decressac M, Kadkhodaei B, Mattsson B, Laguna A, Perlmann T, Björklund A.  $\alpha$ -  
751 Synuclein-induced down-regulation of Nurr1 disrupts GDNF signaling in nigral  
752 dopamine neurons. *Sci Transl Med*. 2012;4(163):163ra56.
- 753 47. Lee G, Tanaka M, Park K, Lee SS, Kim YM, Junn E, et al. Casein kinase II-  
754 mediated phosphorylation regulates alpha-synuclein/synphilin-1 interaction and  
755 inclusion body formation. *J Biol Chem*. 2004;279(8):6834-9.
- 756 48. Rousseaux MW, de Haro M, Lasagna-Reeves CA, De Maio A, Park J, Jafar-  
757 Nejad P, et al. TRIM28 regulates the nuclear accumulation and toxicity of both alpha-  
758 synuclein and tau. *Elife*. 2016;5.
- 759 49. Oueslati A. Implication of Alpha-Synuclein Phosphorylation at S129 in  
760 Synucleinopathies: What Have We Learned in the Last Decade? *J Parkinsons Dis*.  
761 2016;6(1):39-51.
- 762 50. Fujiwara H, Hasegawa M, Dohmae N, Kawashima A, Masliah E, Goldberg MS, et  
763 al. alpha-Synuclein is phosphorylated in synucleinopathy lesions. *NatCell Biol*.  
764 2002;4(2):160-4.
- 765 51. Gibson SA, Benveniste EN. Protein Kinase CK2: An Emerging Regulator of  
766 Immunity. *Trends Immunol*. 2018;39(2):82-5.

- 767 52. Dominguez I, Sonenshein GE, Seldin DC. Protein kinase CK2 in health and  
768 disease: CK2 and its role in Wnt and NF-kappaB signaling: linking development and  
769 cancer. *Cell Mol Life Sci.* 2009;66(11-12):1850-7.
- 770 53. Hsiao HY, Chiu FL, Chen CM, Wu YR, Chen HM, Chen YC, et al. Inhibition of  
771 soluble tumor necrosis factor is therapeutic in Huntington's disease. *Hum Mol Genet.*  
772 2014;23(16):4328-44.
- 773 54. Mottahedin A, Ardalan M, Chumak T, Riebe I, Ek J, Mallard C. Effect of  
774 Neuroinflammation on Synaptic Organization and Function in the Developing Brain:  
775 Implications for Neurodevelopmental and Neurodegenerative Disorders. *Front Cell*  
776 *Neurosci.* 2017;11:190.
- 777 55. Wood TE, Barry J, Yang Z, Cepeda C, Levine MS, Gray M. Mutant huntingtin  
778 reduction in astrocytes slows disease progression in the BACHD conditional  
779 Huntington's disease mouse model. *Hum Mol Genet.* 2019;28(3):487-500.
- 780 56. Khakh BS, Beaumont V, Cachepe R, Munoz-Sanjuan I, Goldman SA, Grantyn R.  
781 Unravelling and Exploiting Astrocyte Dysfunction in Huntington's Disease. *Trends*  
782 *Neurosci.* 2017;40(7):422-37.
- 783 57. Franchin C, Borgo C, Cesaro L, Zaramella S, Vilardell J, Salvi M, et al. Re-  
784 evaluation of protein kinase CK2 pleiotropy: new insights provided by a  
785 phosphoproteomics analysis of CK2 knockout cells. *Cell Mol Life Sci.*  
786 2018;75(11):2011-26.
- 787 58. Bowie LE, Maiuri T, Alpaugh M, Gabriel M, Arbez N, Galleguillos D, et al. N6-  
788 Furfuryladenine is protective in Huntington's disease models by signaling huntingtin  
789 phosphorylation. *Proc Natl Acad Sci U S A.* 2018;115(30):E7081-E90.

- 790 59. Mikula M, Hanusek K, Paziewska A, Dzwonek A, Rubel T, Bomsztyk K, et al.  
791 Halogenated imidazole derivatives block RNA polymerase II elongation along mitogen  
792 inducible genes. *BMC Mol Biol.* 2010;11:4.
- 793 60. Pagano MA, Bain J, Kazimierczuk Z, Sarno S, Ruzzene M, Di Maira G, et al. The  
794 selectivity of inhibitors of protein kinase CK2: an update. *Biochem J.* 2008;415(3):353-  
795 65.
- 796 61. Hegde RN, Chiki A, Petricca L, Martufi P, Arbez N, Mouchiroud L, et al. TBK1  
797 phosphorylates mutant Huntingtin and suppresses its aggregation and toxicity in  
798 Huntington's disease models. *EMBO J.* 2020;39(17):e104671.
- 799 62. Zarate N, Gundry K, Yu D, Casby J, Eberly LE, Öz G, et al. *In vivo* MR  
800 spectroscopy reflects synapse density in a Huntington's disease mouse model. *bioRxiv.*  
801 2021:2021.10.26.465951.
- 802 63. Samantha L. Schaffner ZW, Diana F. Lazaro , Mary Xylaki , Nicole  
803 Gladish , David T. S. Lin , Julia Maclsaac , Katia Ramadori , Julia M.  
804 Schulze-Hentrich , Tiago F. Outeiro , Michael S. Kobor. Alpha-synuclein  
805 induces epigenomic dysregulation of glutamate signaling and locomotor pathways.  
806 *bioRxiv*2021.
- 807 64. Corrochano S, Renna M, Tomas-Zapico C, Brown SD, Lucas JJ, Rubinsztein  
808 DC, et al.  $\alpha$ -Synuclein levels affect autophagosome numbers in vivo and modulate  
809 Huntington disease pathology. *Autophagy.* 2012;8(3):431-2.
- 810 65. Inglis KJ, Chereau D, Brigham EF, Chiou SS, Schöbel S, Frigon NL, et al. Polo-  
811 like kinase 2 (PLK2) phosphorylates alpha-synuclein at serine 129 in central nervous  
812 system. *J Biol Chem.* 2009;284(5):2598-602.

- 813 66. Takahashi K, Ohsawa I, Shirasawa T, Takahashi M. Early-onset motor  
814 impairment and increased accumulation of phosphorylated  $\alpha$ -synuclein in the motor  
815 cortex of normal aging mice are ameliorated by coenzyme Q. *Exp Gerontol.*  
816 2016;81:65-75.
- 817 67. Xu X, Toselli PA, Russell LD, Seldin DC. Globozoospermia in mice lacking the  
818 casein kinase II alpha' catalytic subunit. *NatGenet.* 1999;23(1):118-21.
- 819 68. Cavaccini A, Durkee C, Kofuji P, Tonini R, Araque A. Astrocyte Signaling Gates  
820 Long-Term Depression at Corticostriatal Synapses of the Direct Pathway. *J Neurosci.*  
821 2020;40(30):5757-68.
- 822 69. Langfelder P, Horvath S. WGCNA: an R package for weighted correlation  
823 network analysis. *BMC Bioinformatics.* 2008;9:559.

824

## 825 **Figure Legends**

826

827 **Figure 1. CK2 $\alpha$ ' levels progressively increase in the striatum of zQ175 and**  
828 **correlate with HTT aggregation and NeuN depletion. a-f**, Immunostaining and  
829 quantification of HTT puncta detected with anti-HTT EM48 antibody ( $n=6$   
830 mice/genotype) (**a, b**), NeuN<sup>+</sup> cells ( $n=3$  mice/genotype) (**c, d**) and CK2 $\alpha$ ' levels ( $n=6$   
831 mice/genotype) (**e, f**) in zQ175 compared with WT mice at 3, 6, 12 and 22 months. **g**,  
832 CK2 $\alpha$ ' mRNA levels analyzed by RT-qPCR in striatum and cortex of 6-month-old mice.  
833 Data was normalized to GAPDH and WT striatum ( $n=3$  mice/genotype). **h**, Linear  
834 regression analysis between CK2 $\alpha$ ' levels and HTT puncta, and **i**, between CK2 $\alpha$ ' levels

835 and number of NeuN<sup>+</sup> cells in zQ175 mice. The Pearson correlation coefficient ( $\rho$ ) and  
836  $R^2$  are indicated. Data are mean  $\pm$  SEM with significance determined by one-way  
837 ANOVA with Dunnett's post-hoc test in **b**, mean  $\pm$  SD with significance determined by one-  
838 way ANOVA Dunnett's post-hoc test in **f** and two-way ANOVA with Tukey's post-hoc test in  
839 **d** and **g**. p-values  $<0.05$  are indicated. n.s = not significant. Scale bar, 50  $\mu$ m.

840

841 **Figure 2.** CK2 $\alpha'$  haploinsufficiency increased the frequency of AMPA-mediated  
842 miniature excitatory postsynaptic currents (mEPSC) in the dorsolateral striatum of  
843 zQ175 mice. **a, b**, Representative images show the labeling (**a**) and quantification (**b**) of  
844 CK2 $\alpha'$  in striatal MSNs immunostained for Ctip2, a specific MSN marker in WT, zQ175  
845 and zQ175:CK2 $\alpha'$  (<sup>+/-</sup>) mice at 12 months of age ( $n=6$  mice/genotype). Scale bar, 50  $\mu$ m.  
846 **c**, Image shows whole-cell patch-clamp recording diagram in acute dorsolateral striatum  
847 slices, where Ctip2 labeled MSNs from 12-month-old mice. Scale bar 500  $\mu$ m, Ctr:  
848 Cortex; Str: Striatum. **d**, Input–output curve (WT,  $n = 8$ ; zQ175,  $n = 9$ ; zQ175:CK2 $\alpha'$ (<sup>+/-</sup>)  $n$   
849 = 13). Representative traces are shown in the top inset. **e**, Short-term potentiation  
850 measured via paired-pulse facilitation (WT,  $n = 8$ ; zQ175,  $n = 9$ ; zQ175:CK2 $\alpha'$ (<sup>+/-</sup>)  $n =$   
851 11). Representative traces of two consecutive stimuli delivered at 25 ms time intervals  
852 are shown in the top inset. **f**, Short-term depression analyzed through synaptic fatigue  
853 (WT,  $n = 7$ ; zQ175,  $n = 9$ ; zQ175:CK2 $\alpha'$ (<sup>+/-</sup>)  $n = 12$ ). Representative traces are shown in  
854 the top inset. Values were analyzed using two-way ANOVA with Tukey's post-hoc  
855 analysis. **g, h**, Spontaneous recordings of mini excitatory postsynaptic currents  
856 (mEPSCs). Amplitude (in pA; left panel) (**g**) and frequency (in Hz; right panel) (**h**) were  
857 analyzed (WT,  $n = 10$ ; zQ175,  $n = 9$ ; zQ175:CK2 $\alpha'$ (<sup>+/-</sup>)  $n = 12$ ). **I**, Representative mEPSC

858 traces. Values were analyzed using one-way ANOVA with Dunn's post-hoc analysis. P  
859 values <0.05 are indicated. Error bars represent mean  $\pm$  SEM from at least 3  
860 mice/genotype.

861

862 **Figure 3.** Genetic deletion of CK2 $\alpha'$  improved motor coordination in zQ175. **a-c**,  
863 Latency to fall off the rod (Rotarod test) for three consecutive days. **d-f**, Number of foot  
864 slips recorded while walking on four different types of beams with different degrees of  
865 difficulty from less to more challenging: medium-square, medium round, small-square  
866 and small-round (Beam test). Analyses were performed at 3, 6 and 12 months of age (n  
867 =16-18 mice/genotype in 3 months, n= 12-14 for 6 months and n = 5-6 for 12 months).  
868 Error bars denote mean  $\pm$  SEM, values were analyzed by two-way ANOVA with *Sidak's*  
869 post-hoc test. p-values <0.05 are indicated, n.s = not significant.

870

871 **Figure 4.** Depletion of CK2 $\alpha'$  restored the expression of synaptic genes associated with  
872  $\alpha$ -syn-dependent regulation in the striatum of symptomatic zQ175 mice. **a**, Kruskal-  
873 Wallis test of module expressions between zQ175 (HD) mice and zQ175:CK2 $\alpha'$ <sup>(+/-)</sup>  
874 mice. The y-axis is the negative log transformed p-values. **b**, Expressions of module  
875 "Greenyellow" in each mouse sample. **c**, IPA canonical pathway analysis, **d**, enrichment  
876 analysis of GO terms in CC (cellular component). **e-f**, Gene expression for microglia  
877 marker genes; A1-inducing and pan-reactive microglia genes (40) (**e**) and astrocyte  
878 markers representative of A1, A2 and pan-reactive astrocytes genes (40) (**f**) in WT,  
879 zQ175, CK2 $\alpha'$ <sup>(+/-)</sup> and zQ175:CK2 $\alpha'$ <sup>(+/-)</sup> mice. **g, h**, Mean log<sub>2</sub> fold change between



880 zQ175 and zQ175:CK2 $\alpha'$ <sup>(+/-)</sup> mice compared to WT for genes representative of the HD-  
881 astrocyte molecular signature (41). (g) and the CK2 $\alpha'$ -mediated RNA signature (h).  
882 Purple asterisk (\*) indicates synaptic function, (◇) indicates genes present in the  
883 Greenyellow module. i, IPA canonical pathway analysis for the CK2 $\alpha'$ -mediated RNA  
884 signature.

885

886 **Figure 5.** SNCA regulates the expression of genes identified in the CK2 $\alpha'$  mediated  
887 RNA signature. a, SNCA and DGEs connection by IPA network analysis. Purple  
888 asterisks denote synaptic function. b, RT-qPCR in Q7 and Q111 cells ( $n = 6-8$   
889 experiments). c-e, siRNA knockdown of SNCA (siSNCA) for 24 h in *STHdh* Q7 (d) and  
890 Q111 cells (e), and RT-qPCR for SNCA (c) and SNCA putative gene targets (d, e).  
891 Data were normalized with GAPDH and relativized to non-targeting control siRNA-  
892 treated cells (Scr.), ( $n = 5$  experiments). Four data points fell in the axis break for  
893 *Slc30a3*. f, Immunoblotting for  $\alpha$ -syn, GFP and GAPDH in Q7 and Q111 cells after  
894 plasmid transfections. Q7 and Q111 cells were transfected with pEGFP (control) or  $\alpha$ -  
895 syn-GFP overexpression (OE) and harvested 24 h after transfection. g, h, RT-qPCR for  
896 Q7 (g) and Q111 cells (h) transfected with control or  $\alpha$ -syn-GFP. Data were normalized  
897 with GAPDH and relativized to non-targeting control pEGFP-treated cells, ( $n =$   
898 3 experiments). Data are mean  $\pm$  SEM with significance determined by Welch's t-test.

899

900 **Figure 6.**  $\alpha$ -syn differentially accumulates in the nucleus of symptomatic zQ175 mice  
901 and colocalized with mtHTT. a,  $\alpha$ -syn (4D6 antibody) IB in the striatum of WT, zQ175

902 and SNCA<sup>KO</sup> and **b** in WT, zQ175 and zQ175:CK2 $\alpha'$ <sup>(+/-)</sup> mice at 12 months old. GAPDH  
903 used as loading control. **c**,  $\alpha$ -syn protein levels analyzed by Image J from IB analyses  
904 (n= 5-6 mice/genotype). **d**, Nuclear/cytoplasmic fractionation of striatum samples from  
905 12-month-old WT, zQ175 and SNCA<sup>KO</sup> mice. **e**, Quantification of nuclear  $\alpha$ -syn from  
906 images in D (n=4 mice/genotype). **f**,  $\alpha$ -syn and HTT (EM48 antibody) IF images of  
907 dorsal striatum sections from 12 month old WT, zQ175 and zQ175:CK2 $\alpha'$ <sup>(+/-)</sup> (n=3  
908 mice/genotype). White arrows indicate  $\alpha$ -syn/HTT colocalization. Scale bar, 10  $\mu$ m. **g**,  
909 Magnification of images from F. Scale bar, 2  $\mu$ m. Grey circles represent nuclei. **h**  
910 Number of cytoplasmic and **i** nuclear EM48<sup>+</sup> puncta. A total of three images per brain  
911 section and three brain sections per genotype were analyzed (n=27 images, n=3 mice/  
912 genotype). **j**, Number of colocalized  $\alpha$ -syn and EM48<sup>+</sup> puncta calculated using Image J  
913 Puncta analysis plugin (n=3 mice/genotype). Error bars denote mean  $\pm$  SEM, values  
914 were analyzed by Student's t-test.

915

916 **Figure 7.** CK2 $\alpha'$  regulates phosphorylation of S129- $\alpha$ -syn and nuclear accumulation in  
917 symptomatic zQ175 mice. **a**, pS129- $\alpha$ -syn (EP1536Y antibody) IB in the striatum of 12-  
918 month-old WT, zQ175 and SNCA<sup>KO</sup> (n=4 mice/genotype). **b**, pS129- $\alpha$ -syn (81A  
919 antibody) IB in the striatum of patients with HD (Vonsattel grade 3 and 4, Harvard Brain  
920 Tissue Resource Center) compared to age and sex matched controls. GAPDH is used  
921 as loading control. **c**, pS129- $\alpha$ -syn protein levels (combined grades 3 and 4) analyzed  
922 by Image J from images in **b**. **d**, pS129- $\alpha$ -syn IF (81A antibody) in the dorsal striatum of  
923 12-month-old WT, zQ175 and zQ175:CK2 $\alpha'$ <sup>(+/-)</sup> (n=3 mice/genotype), Scale bar, 20  $\mu$ m.  
924 **e**, pS129- $\alpha$ -syn fluorescence signal was calculated using Image J from images in D

925 (n=3 mice/genotype, n=27 images per mouse). **f**, Magnification of images in D, pS129-  
926  $\alpha$ -syn and EM48 colocalization in zQ175 and zQ175:CK2 $\alpha'$ <sup>(+/-)</sup> (n=3 mice/group). **g**,  
927 Quantification of pS129- $\alpha$ -syn and EM48 colocalized puncta using Image J puncta plug  
928 in. All data are mean  $\pm$  SEM. Statistical analyses were conducted by one-way ANOVA.  
929 **h**, Working model for the role of CK2 $\alpha'$  in the regulation of pS129- $\alpha$ -syn and HD-like  
930 phenotype.

931

932

933

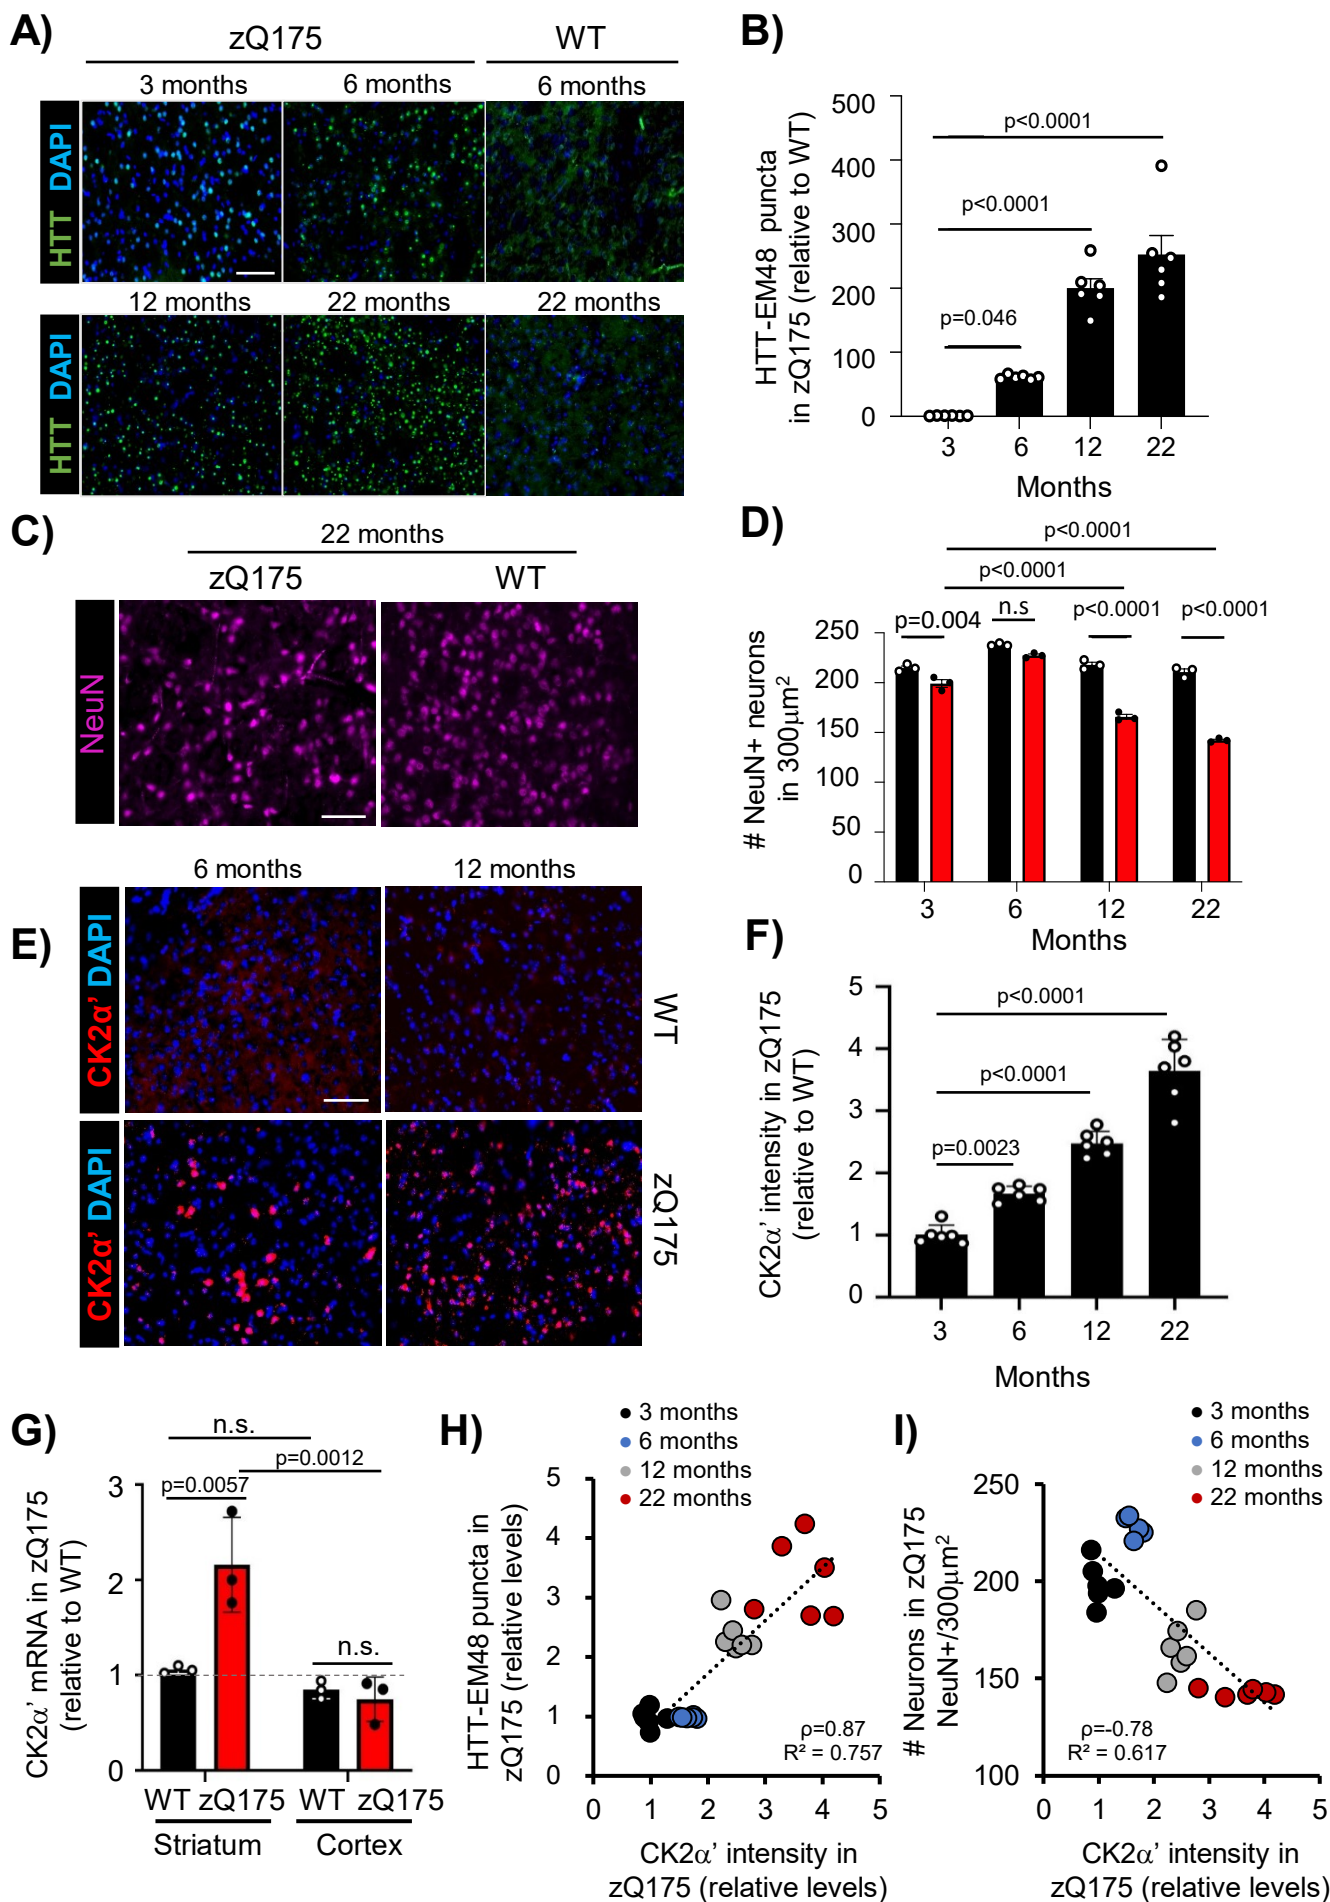

**Figure 1**

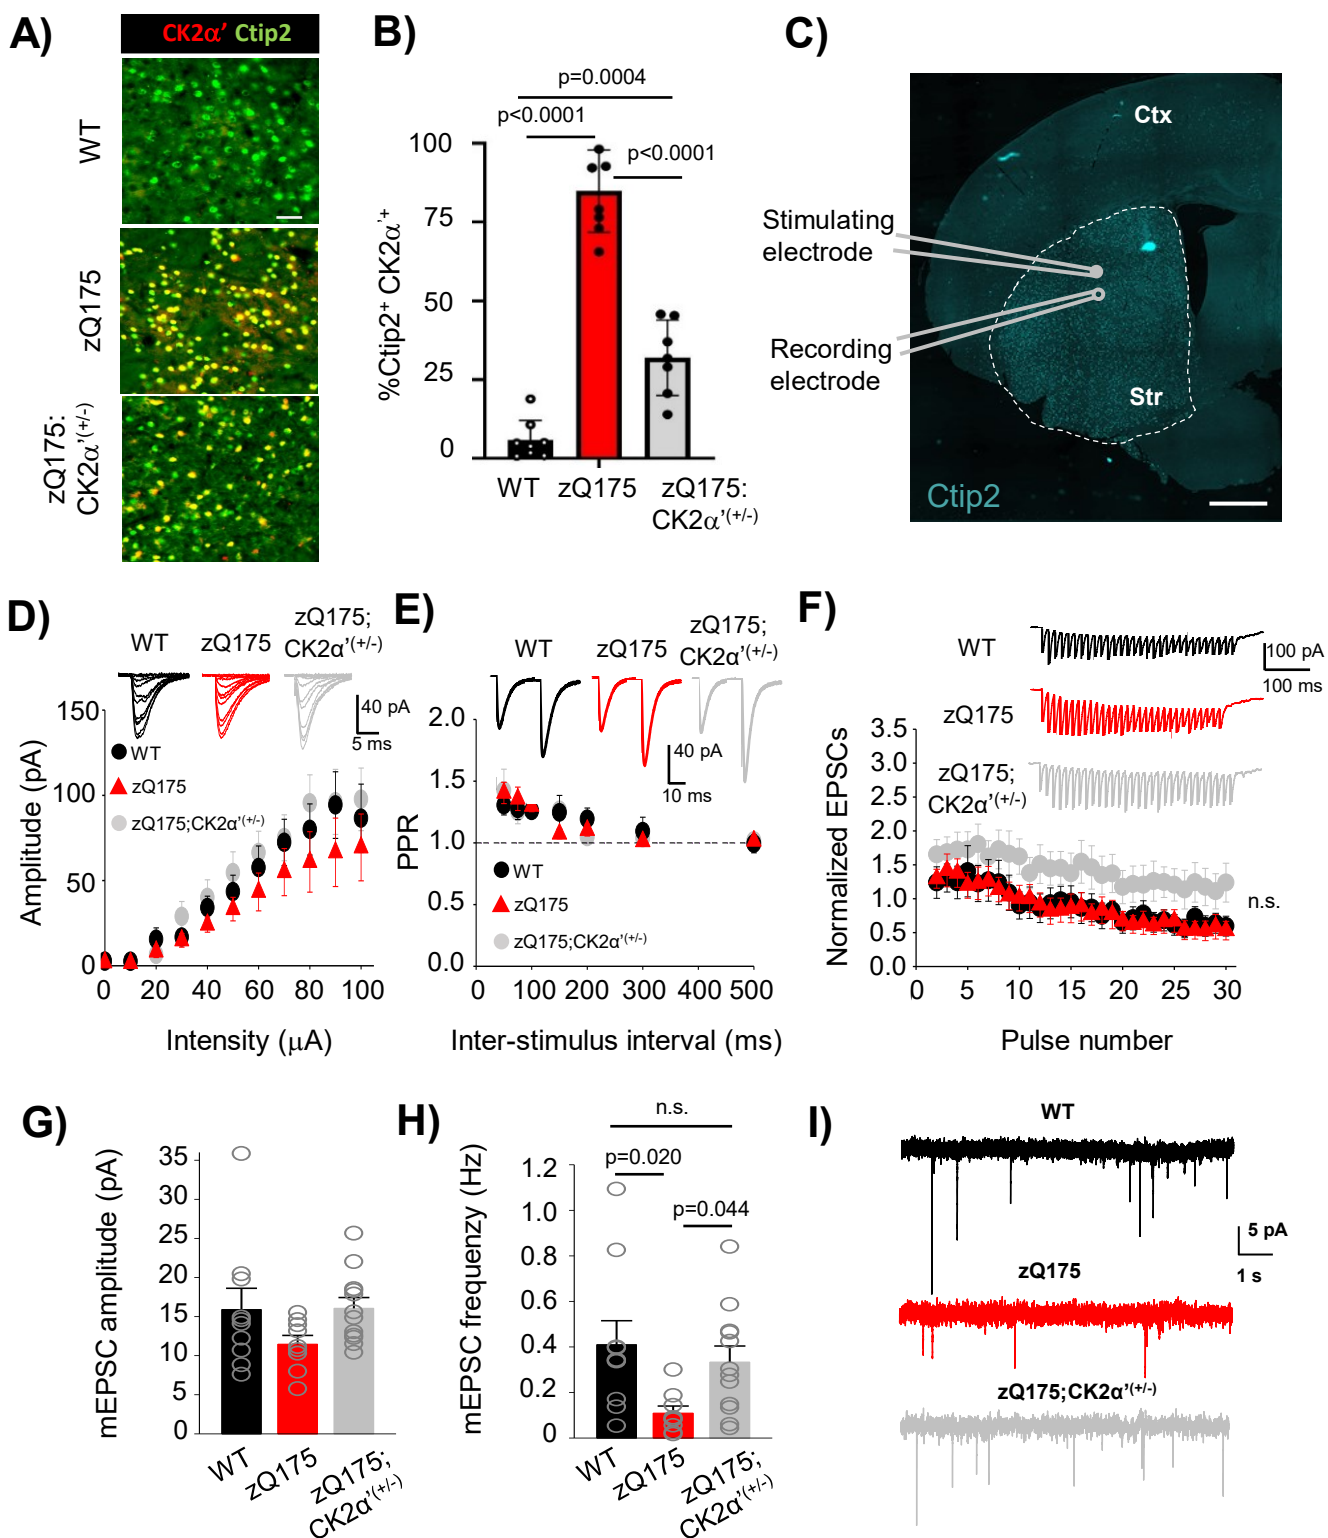

**Figure 2**

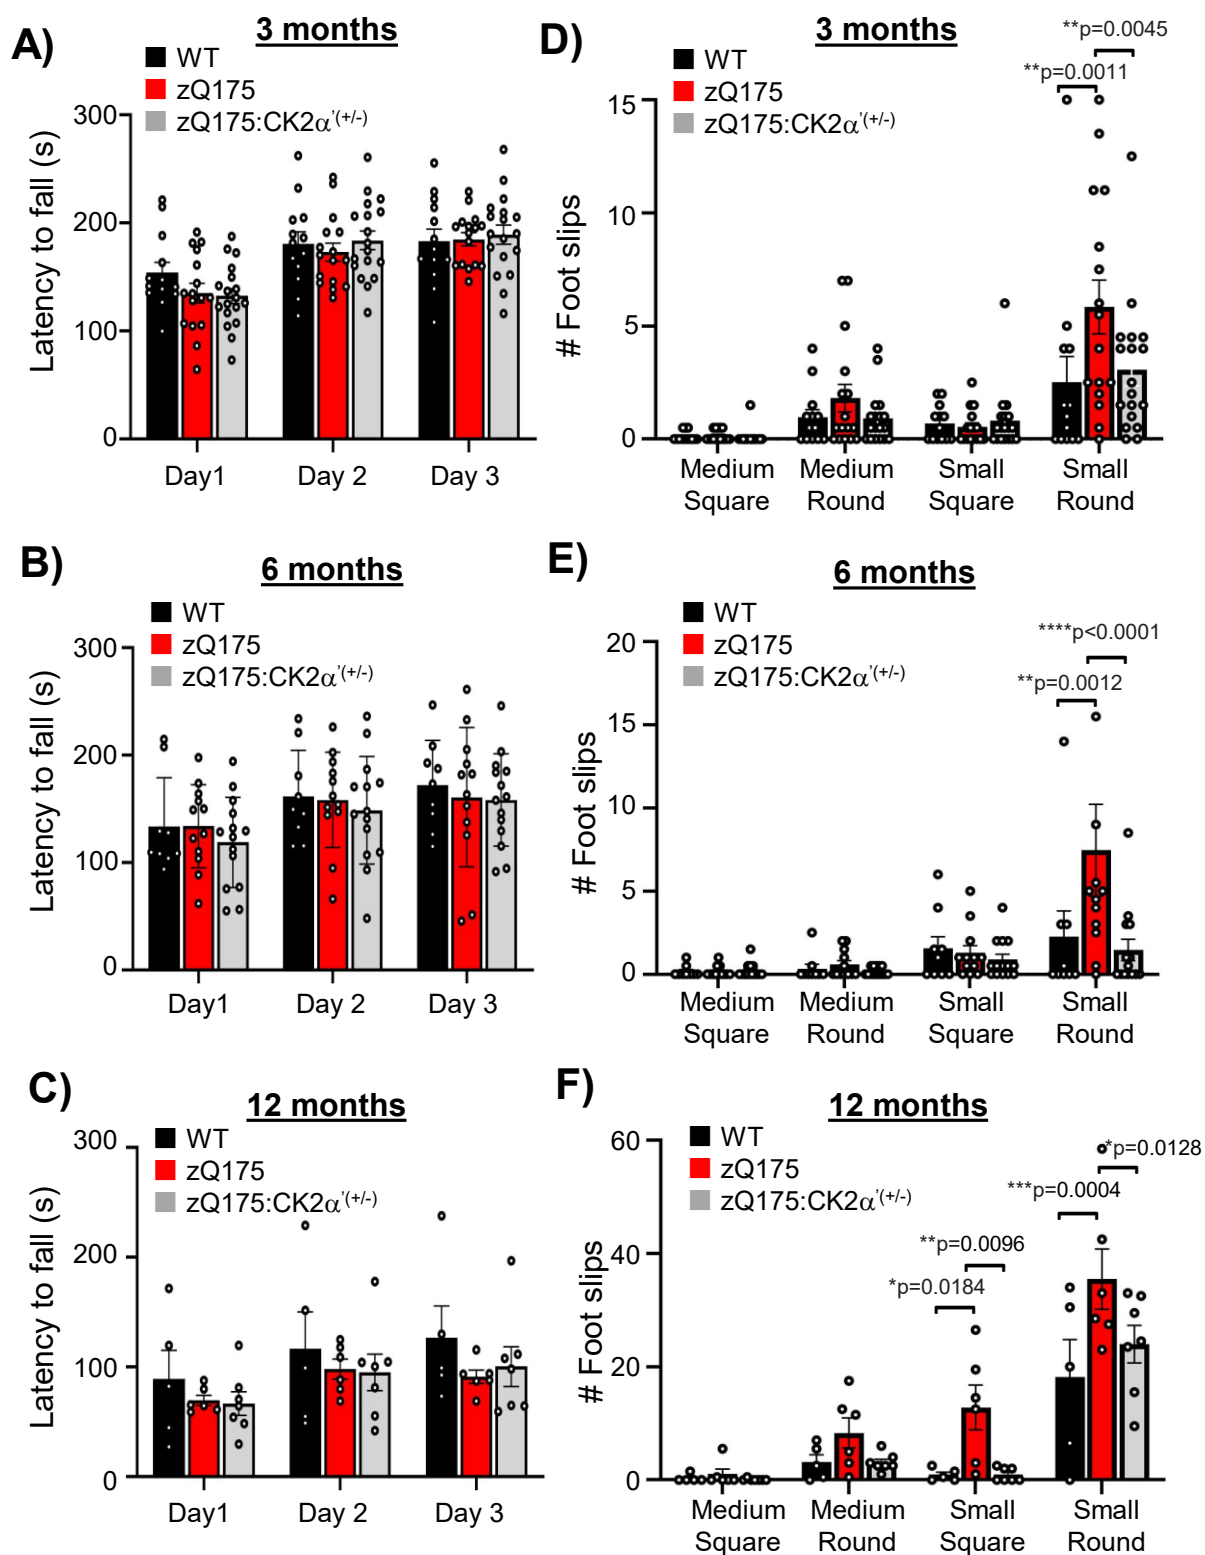

Figure 3



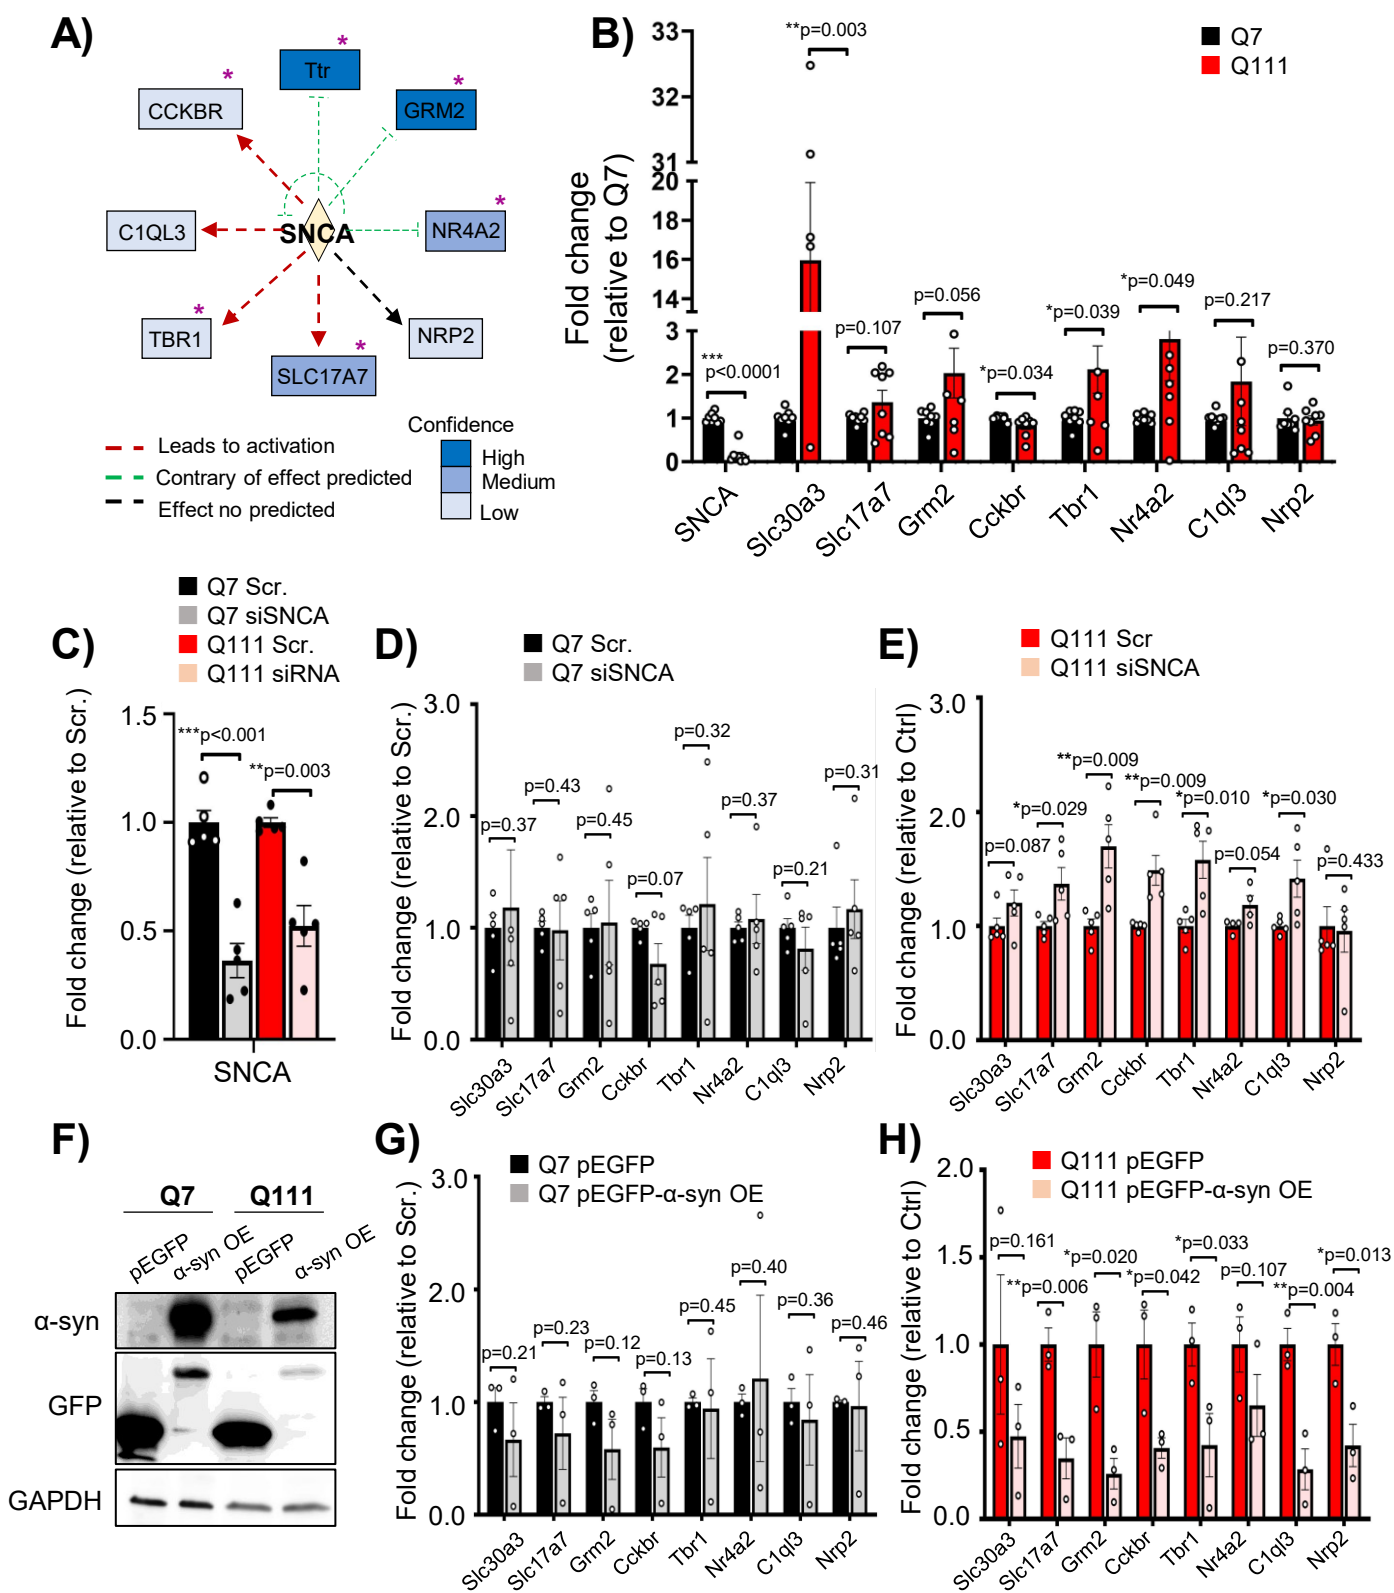

**Figure 5**



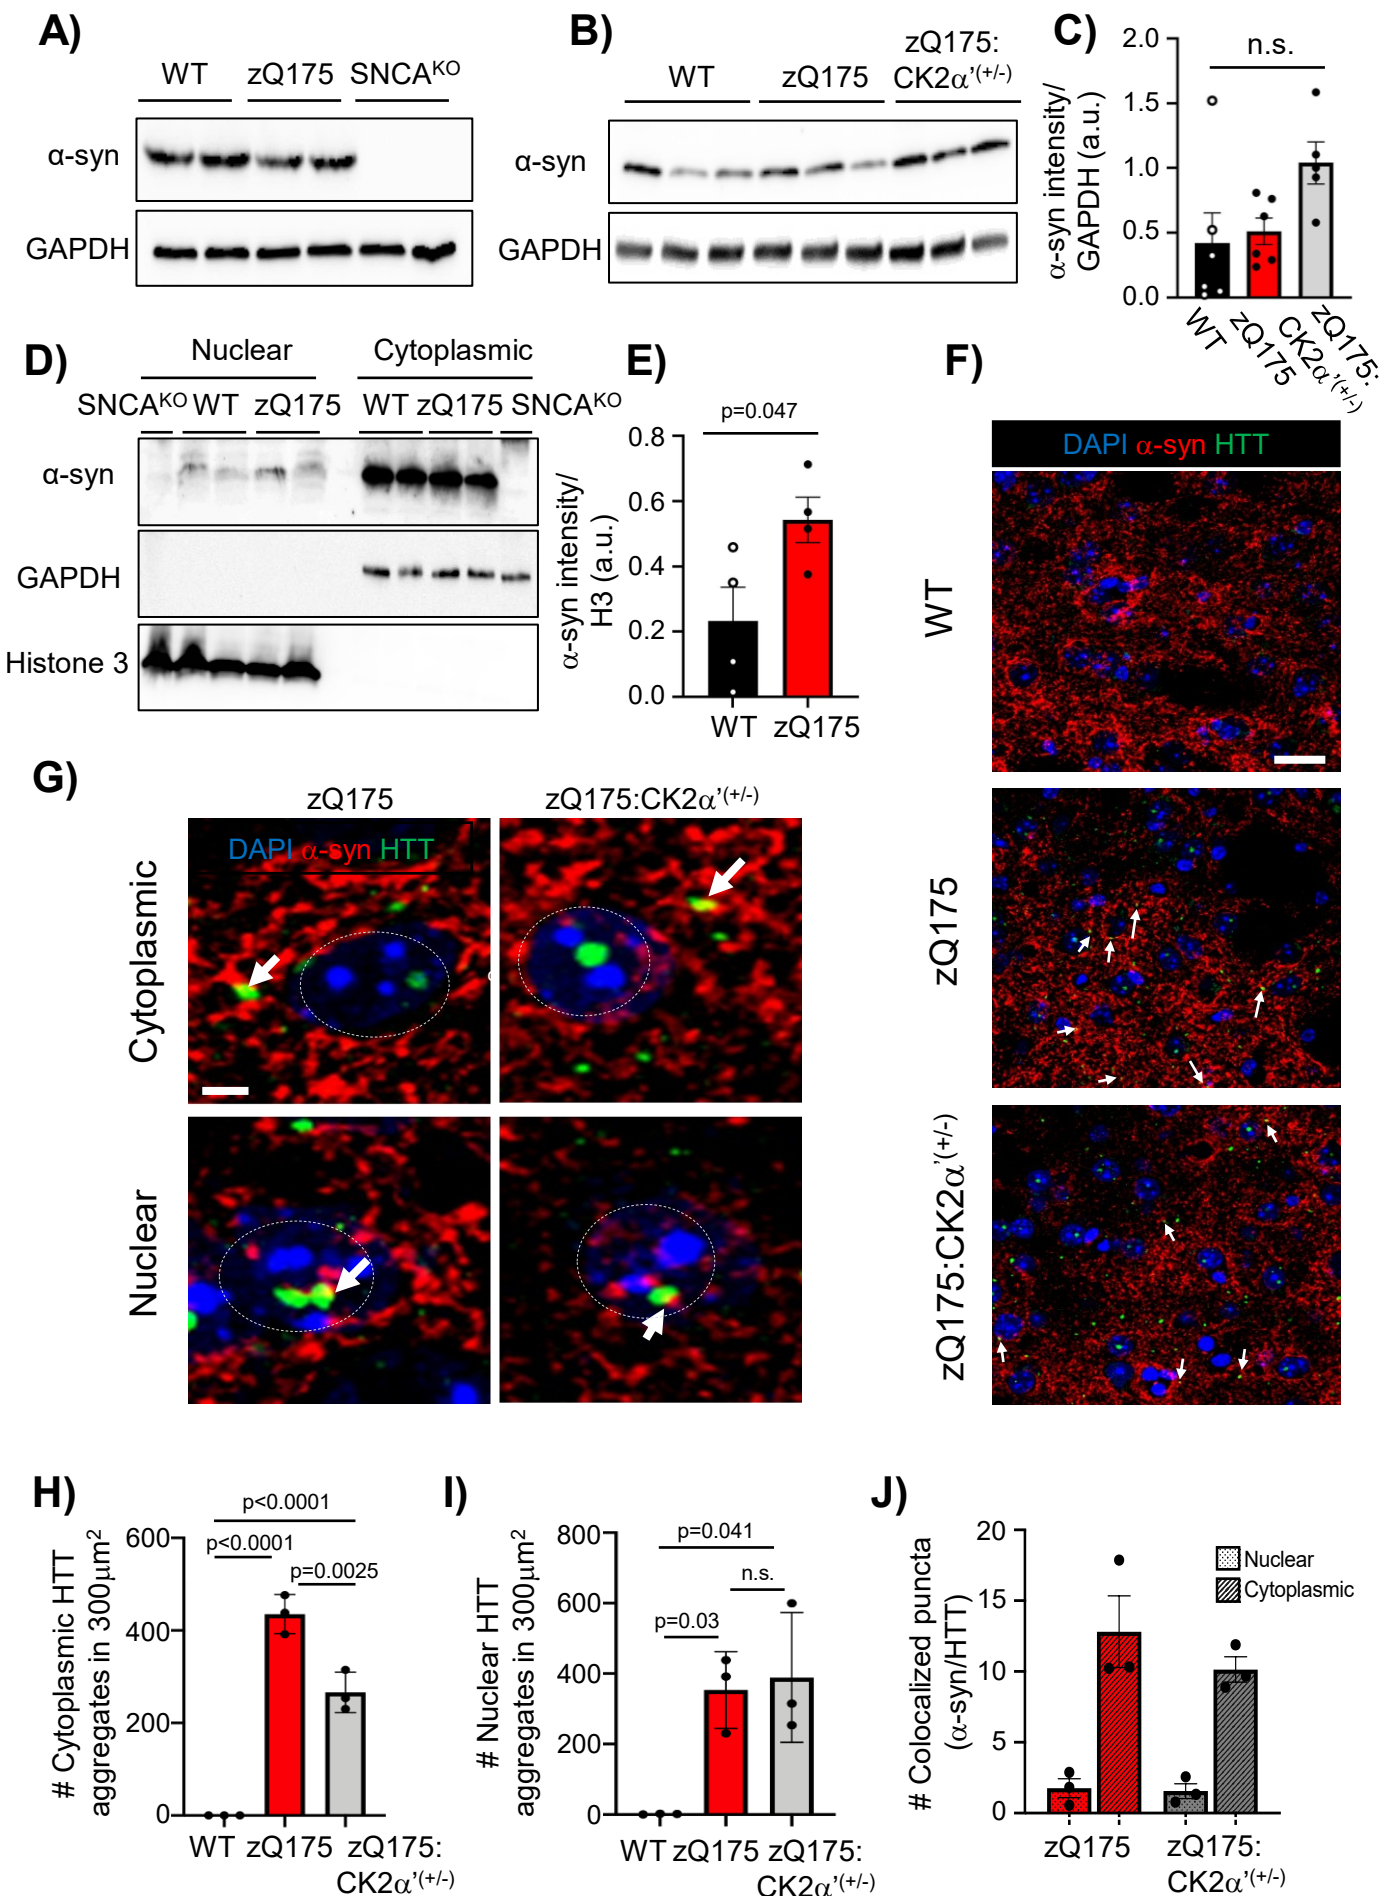

**Figure 6**

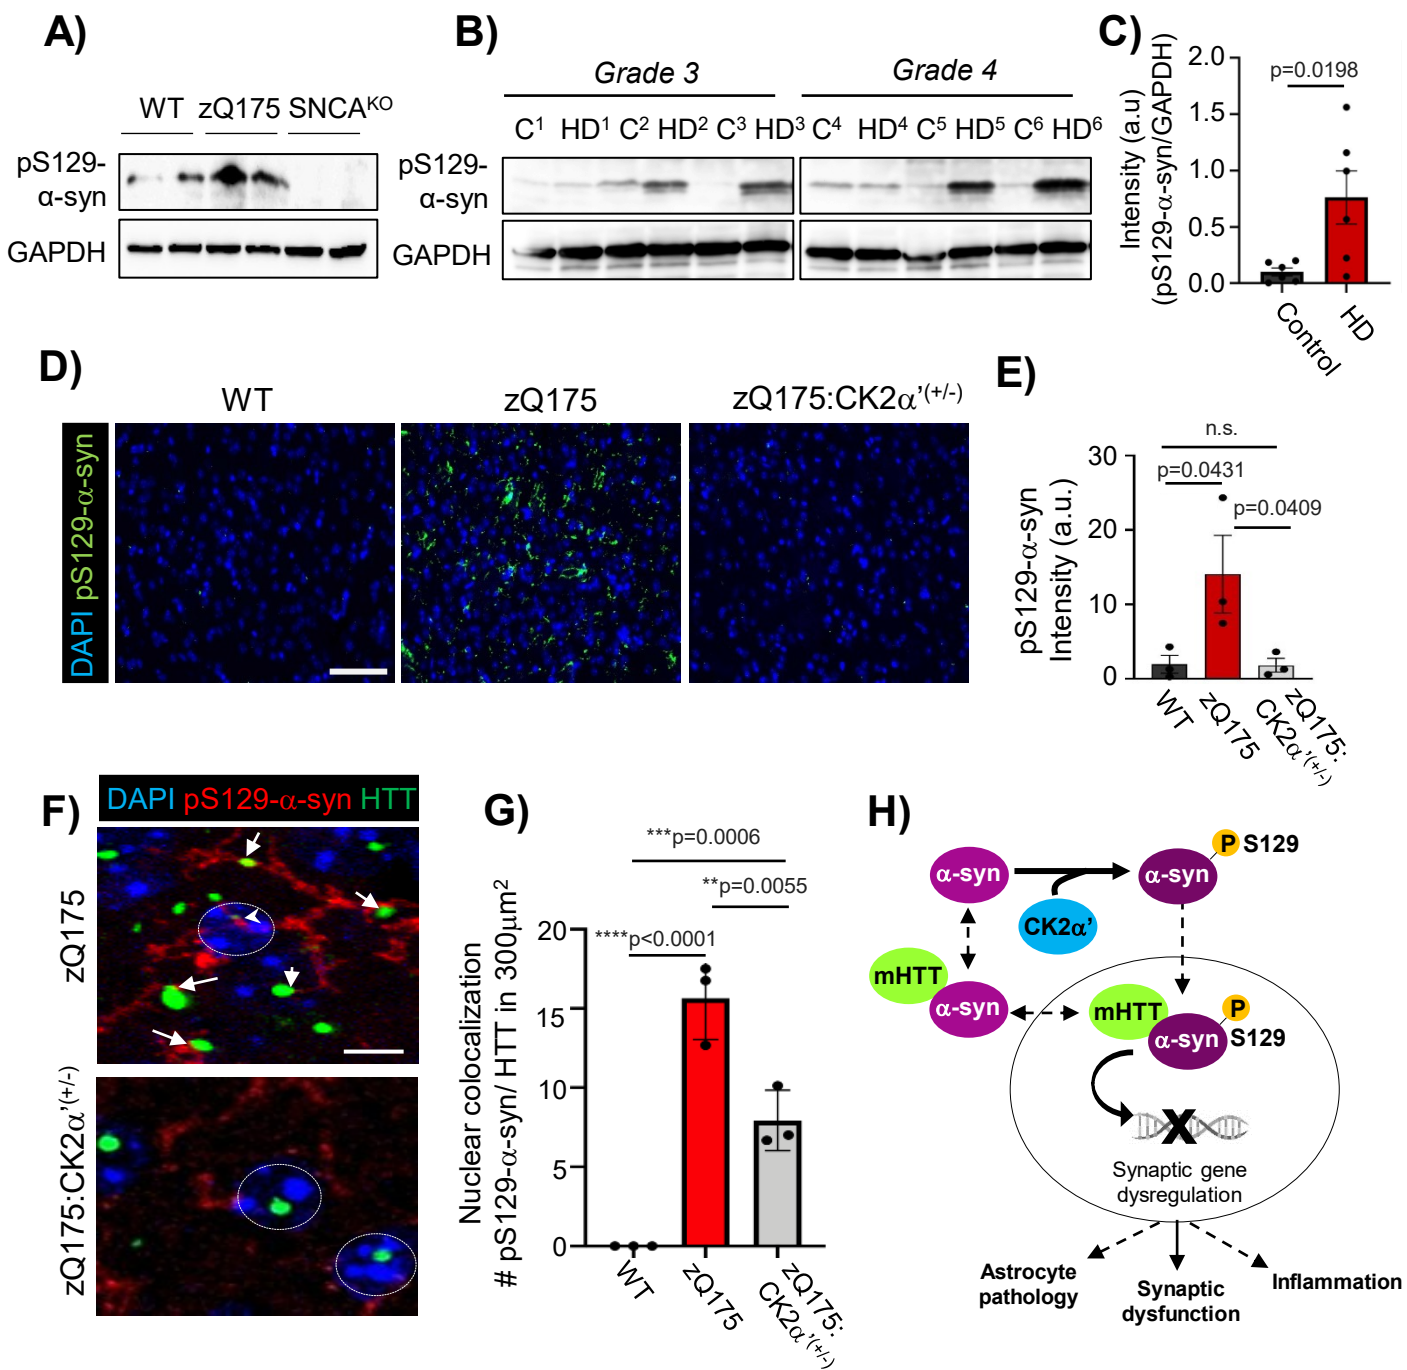

Figure 7
