1 **CK2 alpha prime and alpha-synuclein pathogenic functional interaction mediates**  
2 **inflammation and transcriptional dysregulation in Huntington's disease**

3  
4 Dahyun Yu<sup>1,\*</sup>, Nicole Zarate<sup>1,\*</sup>, Francesco Cuccu<sup>1,3</sup>, Johnny S. Yue<sup>1,4</sup>, Taylor G. Brown<sup>1</sup>,  
5 Wei Tsai<sup>1</sup>, Rachel Mansky<sup>1</sup>, Kevin Jiang<sup>1</sup>, Hyuck Kim<sup>1#</sup>, Angel White<sup>1</sup>, Carmen  
6 Nanclares<sup>1</sup>, Tessa Nichols-Meade<sup>1</sup>, Sarah N. Larson<sup>2</sup>, Katie Gundry<sup>2</sup>, Ying Zhang<sup>5</sup>,  
7 Cristina Tomas-Zapico<sup>6#</sup>, Jose J. Lucas<sup>6,7</sup>, Michael Benneyworth<sup>1</sup>, Gülin Öz<sup>2</sup>, Marija  
8 Cvetanovic<sup>1</sup>, Alfonso Araque<sup>1</sup> and Rocio Gomez-Pastor<sup>1±</sup>.

9  
10 <sup>1</sup>Department of Neuroscience, School of Medicine, University of Minnesota,  
11 Minneapolis, MN, United States. <sup>2</sup>Center for Magnetic Resonance Research.  
12 Department of Radiology, School of Medicine, University of Minnesota, Minneapolis,  
13 MN, United States. <sup>3</sup>Department of Life and Environment Sciences, University of  
14 Cagliari, Cagliari, Italy. <sup>4</sup>Mounds View High School, Arden Hills, Minnesota. <sup>5</sup>Minnesota  
15 Supercomputing Institute, University of Minnesota, Minneapolis, MN, United States. <sup>6</sup>  
16 Centro de Biología Molecular 'Severo Ochoa' (CBMSO) CSIC/UAM, Madrid, Spain.  
17 <sup>7</sup>Networking Research Center on Neurodegenerative Diseases (CIBERNED), Instituto  
18 de Salud Carlos III, Madrid, Spain

19  
20 #Current address: HK, MEPSGEN, Seoul 05836, South Korea. CTZ, Department of  
21 Functional Biology, Physiology, University of Oviedo, Asturias 33006, Spain; Health  
22 Research Institute of the Principality of Asturias (ISPA), Asturias 33011, Spain.

23  
24 \*These authors contributed equally to the manuscript

25  
26 ±Correspondence should be addressed to Rocio Gomez-Pastor, University of  
27 Minnesota, 321 Church St. SE, Jackson Hall Room 6-145, Minneapolis, MN 55455,  
28 rgomezpa@umn.edu

29  
30 **Keywords:** Huntington's disease, polyglutamine, CK2 alpha prime, alpha-synuclein,  
31 neuroinflammation, protein aggregation.

32

33

34

35

36

## 37 **Abstract**

38 Huntington's Disease (HD) is a neurodegenerative disorder caused by a CAG  
39 trinucleotide repeat expansion in the Htt gene for which no therapies are available. This  
40 mutation causes HTT protein misfolding and aggregation, preferentially affecting  
41 medium spiny neurons (MSNs) of the basal ganglia. Transcriptional perturbations in  
42 synaptic genes and neuroinflammation are key processes that precede MSN  
43 dysfunction and motor symptom onset. Understanding the interplay between these  
44 processes is crucial to develop effective therapeutic strategies to treat HD. We  
45 investigated whether protein kinase CK2 $\alpha'$ , a kinase upregulated in MSNs in HD and  
46 previously associated with Parkinson's disease (PD), participates in the regulation of  
47 neuroinflammation and synaptic function during HD progression. We used the  
48 heterozygous knock-in zQ175 HD mouse model that lacks one allele of CK2 $\alpha'$  and  
49 performed cytokine proteome profiling, RNA-seq, electrophysiological recordings, and  
50 behavioral analyses. We showed that CK2 $\alpha'$  haploinsufficiency in zQ175 mice  
51 ameliorated neuroinflammation, HTT aggregation, transcriptional alterations, excitatory  
52 synaptic transmission deficits, and motor dysfunction. Our RNA-seq analyses also  
53 revealed a connection between  $\alpha$ -syn, a protein associated with PD, and the  
54 transcriptional perturbations mediated by CK2 $\alpha'$  in HD. We found that CK2 $\alpha'$  increased  
55  $\alpha$ -syn serine 129 phosphorylation (pS129- $\alpha$ -syn), a post-translational modification linked  
56 to  $\alpha$ -synucleinopathy, and its accumulation in the nucleus of MSNs in zQ175 mice and  
57 in patients with HD. Our data demonstrated that CK2 $\alpha'$  negatively contributes to HD by  
58 promoting striatal synucleinopathy, transcriptional alteration of synaptic genes and  
59 neuroinflammation. We propose CK2 $\alpha'$  as a potential therapeutic target to treat HD.

60

## 61 **Significance statement**

62 Upregulation of Protein kinase CK2 $\alpha'$  mediates neuroinflammation and transcriptional  
63 dysregulation of synaptic genes in the zQ175 mouse model of HD and its depletion  
64 improved several HD-like phenotypes in this mouse model. These effects are mediated,  
65 at least in part, by the CK2 $\alpha'$ -dependent phosphorylation of  $\alpha$ -syn serine 129 in the  
66 striatum of HD mice, a post-translational modification associated with synucleinopathy  
67 and PD. Our study highlights a potential convergent mechanism of neurodegeneration  
68 between HD and PD and suggests targeting CK2 $\alpha'$  as a therapeutic strategy to  
69 ameliorate neuroinflammation and synaptic dysfunction in HD and perhaps other  
70 neurodegenerative diseases.

71

72

73

74

75

76

## 77 Introduction

78 Huntington's disease (HD) is a neurodegenerative disorder that manifests with  
79 progressive motor, cognitive, and psychiatric deficits for which there is no cure. HD is  
80 caused by a poly-glutamine (polyQ) expansion in exon 1 of the Huntingtin (*HTT*) gene.  
81 This mutation results in progressive misfolding and aggregation of mutant HTT protein  
82 (mtHTT) and preferentially affects GABAergic medium spiny neurons (MSNs) in the  
83 striatum (1-3). Transcriptional perturbations in synaptic genes and neuroinflammation  
84 are key processes that precede MSN death and motor symptom onset (4). However,  
85 our understanding of the interplay between these processes, mtHTT aggregation, and  
86 their contribution to MSN susceptibility in HD is still incomplete.

87 Protein kinase CK2 is at the crossroads between neuroinflammation, protein  
88 aggregation, and synaptic activity, and has recently emerged as a potential therapeutic  
89 target of neurodegeneration (5, 6). CK2 is a highly conserved serine/threonine kinase  
90 composed of two regulatory beta (CK2 $\beta$ ) subunits and two catalytic subunits, alpha  
91 (CK2 $\alpha$ ) and alpha prime (CK2 $\alpha'$ ) (7, 8). The two catalytic subunits share high structural  
92 homology, but they differ in their tissue distribution and their ability to phosphorylate  
93 different substrates (9, 10). Our previous work showed that CK2 $\alpha'$ , but not CK2 $\alpha$ , is  
94 induced in HD MSNs and is responsible for the phosphorylation and degradation of the  
95 heat shock transcription factor HSF1, the master regulator of chaperones and protein  
96 quality control systems (11, 12). CK2 $\alpha'$ -dependent degradation of HSF1 contributes to  
97 chaperone dysregulation and HTT aggregation in cells and mouse models of HD (11).  
98 However, other studies conducted *in vitro* have suggested a protective role of CK2 in  
99 HD (13, 14), imposing the necessity to clarify the specific involvement of CK2 $\alpha'$  in HD  
100 pathogenesis and its potential as a therapeutic target in HD.

101 CK2 is involved in the phosphorylation and aggregation of HTT (11, 14), as well as the  
102 phosphorylation and aggregation of other pathological proteins like microtubule  
103 associated protein tau (MAPT) and alpha-synuclein ( $\alpha$ -syn), proteins involved in  
104 Alzheimer's (AD) and Parkinson's disease (PD) (15-17). Tau and  $\alpha$ -syn contribute to the  
105 activation of neuroinflammatory processes, transcriptional dysregulation, and synaptic  
106 deficits in AD and PD (18, 19). These pathophysiological alterations are also observed in  
107 HD as well as the association of tau and  $\alpha$ -syn in HD pathology (20, 21). Specific tau  
108 modifications and cleavage products associated with cognitive decline in AD were found  
109 in the brains of HD patients (21, 22), while increased levels of  $\alpha$ -syn were observed in  
110 the plasma of patients with HD (23, 24).  $\alpha$ -syn colocalized with mtHTT aggregates in the  
111 brains of R6/1 HD mice, and its deletion resulted in amelioration of motor deficits (20,  
112 25). However, the mechanisms by which these proteins are altered in HD and the extent  
113 to which they contribute to HD pathophysiology is still unknown.

114 In this study, we characterized the role of CK2 $\alpha'$  in HD *in vivo* by using the  
115 heterozygous zQ175 HD mouse model that lacks one allele of CK2 $\alpha'$ . We showed that  
116 CK2 $\alpha'$  haploinsufficiency decreased the levels of pro-inflammatory cytokines and  
117 improved astrocyte health, restored synaptic gene expression and excitatory synapse  
118 function, and improved motor behavior in zQ175 mice. These neuropathological and  
119 phenotypic changes correlated with alterations in  $\alpha$ -syn serine 129 phosphorylation

120 (pS129- $\alpha$ -syn) in the striatum, a post-translational modification involved in  $\alpha$ -  
121 synucleinopathy, establishing a novel connection between CK2 $\alpha'$  function and  
122 synucleinopathy in HD. Collectively, our data demonstrated that CK2 $\alpha'$  plays a negative  
123 role in HD and indicates the therapeutic potential of modulating CK2 $\alpha'$  to achieve  
124 enhanced neuronal function and neuroprotection.

125

## 126 **Results**

### 127 **Increased CK2 $\alpha'$ levels in the striatum of zQ175 mice parallel progressive HTT** 128 **aggregation and NeuN depletion**

129 Increased CK2 activity has been associated with detrimental effects in protein  
130 homeostasis and neuroinflammation in different neurodegenerative diseases, but its  
131 role in HD is still controversial (11, 13, 14). To determine whether CK2 $\alpha'$  plays a  
132 negative role during HD pathogenesis, we first evaluated the relationship between HTT  
133 aggregation, neuronal loss, and CK2 $\alpha'$  levels in the striatum over time for the  
134 heterozygous zQ175 mouse model at 3 (pre-symptomatic), 6 (early symptomatic), 12  
135 (symptomatic), and 22 months (late-stage disease) of age (26, 27). We observed an  
136 age-dependent increase of HTT aggregates (EM48<sup>+</sup> puncta) and a decreased number  
137 of NeuN<sup>+</sup> neurons (pan-neuronal marker) in the striatum of zQ175 mice (**Fig. 1A-D,**  
138 **S1A**). We confirmed that the depletion of NeuN<sup>+</sup> cells correlated with decreased Ctip2<sup>+</sup>  
139 neurons (MSN marker) (28)(**Fig. S1B, C**). However, we did not observe a significant  
140 difference in the total number of neurons, measured by cresyl violet (**Fig. S1D-F**), or in  
141 striatum volume (**Fig. S1G, H**), suggesting that changes in NeuN and Ctip2 reactivity  
142 may reflect transcriptional dysregulation and/or neuronal dysfunction rather than  
143 neuronal loss.

144 The levels of CK2 $\alpha'$  increased over time in zQ175 mice in the striatum but not in the  
145 cortex (**Fig. 1E-G**), coinciding with HTT aggregation and preceding NeuN depletion.  
146 Regression analysis demonstrated that CK2 $\alpha'$  levels had a significant positive  
147 relationship with HTT aggregation (Pearson  $r(22)=0.87$ ,  $p$  value $<0.001$ ) (**Fig. 1H**) and a  
148 significant negative relationship with the number of NeuN<sup>+</sup> cells (Pearson  $r(22)=-0.78$ ,  $p$   
149 value $<0.001$ ) (**Fig. 1I**).

150

### 151 **CK2 $\alpha'$ haploinsufficiency reduced production of inflammatory cytokines in zQ175**

152 CK2 regulates signaling pathways involved in inflammation (29). Inhibition of CK2 has  
153 previously shown to deplete pro-inflammatory cytokines such as IL-6 (6). IL-6 and other  
154 cytokines are increased in HD and are often used as a marker of disease progression  
155 (30). To determine whether the expression of CK2 $\alpha'$  is directly related to neuronal-  
156 mediated inflammation in HD, we first analyzed the levels of IL-6 in the striatal-derived  
157 mouse cells *STHdh*<sup>Q7/Q7</sup> (control) and *STHdh*<sup>Q111/Q111</sup> (HD cells) (**Fig. 2A**). RT-qPCR  
158 analysis showed an upregulation of CK2 $\alpha'$  in HD cells which paralleled an upregulation

159 of IL-6. CK2 $\alpha'$  knock-down in HD cells reduced mRNA levels of IL-6 when compared to  
160 non-targeting siRNA (scramble) (**Fig. 2B**).

161 To further explore the role of CK2 $\alpha'$  in modulating inflammation in HD, we used the  
162 zQ175 mouse model lacking one allele of CK2 $\alpha'$  (zQ175:CK2 $\alpha'$ <sup>(+/-)</sup>) (**Fig. 2C, D**) which  
163 has previously shown reduced HTT aggregation<sup>11</sup>. We analyzed the levels of 40  
164 different cytokines and chemokines in the striatum of 12-14 month old mice (**Fig. 2E,**  
165 **S2A-C**) and found seven cytokines (IFN- $\gamma$ , IL-1 $\alpha$ , IL-6, IL-7, IL-16, IL-17, IL-23, and  
166 TNF- $\alpha$ ) were decreased in zQ175:CK2 $\alpha'$ <sup>(+/-)</sup> compared to zQ175 (**Fig. 2F**). This  
167 suggests CK2 $\alpha'$  contributes to the characteristic inflammatory profile of HD.

168 Inflammatory cytokines can be produced by both neurons and glial cells. Microglia are  
169 pivotal regulators of CNS inflammatory processes and their activation has been  
170 reported in numerous HD mouse models and in patients with HD (31-33). We evaluated  
171 the levels of the microglial marker Iba1 (Ionized calcium binding adaptor molecule 1) by  
172 immunoblotting (IB) and immunofluorescence (IF) in striatum extracts at 12-14 months  
173 (**Fig. 2G, H, S2D-F**). Total Iba1 levels were significantly increased in zQ175 and  
174 zQ175:CK2 $\alpha'$ <sup>(+/-)</sup> mice compared to WT, but no significant differences were observed  
175 between zQ175 and zQ175:CK2 $\alpha'$ <sup>(+/-)</sup> mice. In addition, no changes were observed in  
176 the number or area size of Iba1<sup>+</sup> cells across all genotypes (**Fig. S2D-F**) and no  
177 expression of IL-6 was seen in Iba1<sup>+</sup> cells (**Fig. S3**), indicating that CK2 $\alpha'$ -mediated  
178 changes of pro-inflammatory cytokine levels may not be attributed to changes in  
179 microglia. We then assessed whether astrocytes could contribute to inducing cytokines  
180 in HD by co-staining IL-6 with different astrocyte markers (S100b, S100 Calcium  
181 Binding Protein B; GFAP, Glial fibrillary acidic protein; and GS, glutamine synthetase)  
182 (**Fig. S3**). Besides Ctip2, only GS<sup>+</sup> astrocytes showed IL-6 immunoreactivity in zQ175  
183 mice.

184

## 185 **CK2 $\alpha'$ contributes to astrocyte pathology in HD**

186 Increases in the number of astrocytes and astrocytic dysfunction are reported in several  
187 neurodegenerative diseases(34), including HD (35). As such, we tested whether the  
188 changes in cytokine levels due to CK2 $\alpha'$  haploinsufficiency were related to changes in  
189 GS<sup>+</sup> astrocytes during HD pathogenesis. We observed a progressive increase in the  
190 number of GS<sup>+</sup> astrocytes in the striatum of zQ175 mice compared to WT, and a  
191 decrease in zQ175:CK2 $\alpha'$ <sup>(+/-)</sup> mice (**Fig. 3A, B**). To confirm the changes observed in  
192 astrocyte number in brain slices, we performed proton magnetic resonance  
193 spectroscopy (<sup>1</sup>H-MRS) *in vivo* at 22 months and measured the concentration of the  
194 astroglia marker *myo*-inositol (Ins) (36, 37) and 14 additional brain metabolites (**Fig. 3C,**  
195 **D, S4A, B**). The concentration of different neuronal metabolites including N-  
196 acetylaspartate (NAA) and glutamate, which are dysregulated in HD (26, 38, 39), did not  
197 differ between zQ175 and zQ175:CK2 $\alpha'$ <sup>(+/-)</sup> mice (**Fig. S4A, B**). However, the levels of  
198 *myo*-inositol (Ins) showed a significant reduction in zQ175:CK2 $\alpha'$ <sup>(+/-)</sup> compared to zQ175  
199 mice (**Fig. 3D**).

200 Cytokines like IL-1 $\alpha$ , TNF- $\alpha$ , and complement component 1q (C1q) can induce the  
201 accumulation of the complement component C3d protein, a protein involved in innate  
202 immunity, altering astrocyte function and promoting astrocyte-dependent cytotoxicity  
203 during aging and neurodegeneration (40, 41). Increased depositions of C3d have been  
204 observed in the striatum of patients with HD and are considered a marker of astrocyte  
205 pathology (40, 42, 43). Since depletion of CK2 $\alpha'$  decreased IL-1 $\alpha$  and TNF- $\alpha$  levels, we  
206 evaluated the levels of C3d by IF and observed a significant age-dependent increase in  
207 the intensity of C3d in zQ175 mice compared to WT mice which was lower in  
208 zQ175:CK2 $\alpha'$ <sup>(+/-)</sup> mice (**Fig. 3E, F**). C3d is expressed by different striatal components  
209 other than astrocytes<sup>42</sup> so we determined the fraction of GS<sup>+</sup> astrocytes that showed  
210 C3d depositions (GS<sup>+</sup>C3d<sup>+</sup>) (**Fig. 3E, E', G**). The percentage of GS<sup>+</sup>C3d<sup>+</sup> astrocytes  
211 showed an age-dependent increase for all genotypes. The levels of C3d progressively  
212 increased in zQ175 mice (**Fig. 3G**), coinciding with the timing of CK2 $\alpha'$  accumulation in  
213 MSNs (**Fig. 1C**). In contrast, zQ175:CK2 $\alpha'$ <sup>(+/-)</sup> showed a significant reduction in  
214 GS<sup>+</sup>C3d<sup>+</sup> astrocytes compared to zQ175 mice at 12 and 22 months and no significant  
215 differences compared to WT mice (**Fig. 3G**), suggesting that neuronal accumulation of  
216 CK2 $\alpha'$  contributes to astrocyte pathology in HD.

217

## 218 **Depletion of CK2 $\alpha'$ improves neuronal function and motor behavior**

219 Astrocyte pathology contributes to progressive loss of striatal excitatory synaptic  
220 transmission and behavioral deficits associated with HD<sup>(44, 45)</sup>. This is supported by  
221 studies where conditional mutant HTT knock-out in astrocytes improved astrocyte  
222 function and restored both synaptic protein expression and MSN excitability in the  
223 BACHD mouse model (46). We assessed the impact of CK2 $\alpha'$  depletion in AMPA-  
224 mediated excitatory transmission by conducting whole-cell patch clamp recordings from  
225 acute dorsolateral striatum coronal slices at 12 months (**Fig. 4A**). MSNs from all  
226 genotypes showed similar profiles in the analysis of basal synaptic transmission,  
227 including input/output curves, paired-pulse facilitation, and synaptic fatigue (**Fig. 4B-D**).  
228 We observed a trend towards increased normalized excitatory postsynaptic currents  
229 (EPSCs) in zQ175:CK2 $\alpha'$ <sup>(+/-)</sup> mice compared to the other two genotypes, but the data  
230 did not reach statistical significance (**Fig. 4D**). Spontaneous neurotransmitter release  
231 and synaptic activity via miniature EPSC (mEPSC) recordings showed that mEPSC  
232 amplitude, reflecting postsynaptic AMPA receptor function, was comparable among the  
233 3 genotypes (**Fig. 4E**). However, mEPSC frequency, which reflects the probability of  
234 neurotransmitter release from presynaptic vesicles and also correlates with the number  
235 of synapses, was reduced in zQ175 mice (**Fig. 4F, G**), as previously reported (47), and  
236 rescued in zQ175:CK2 $\alpha'$ <sup>(+/-)</sup>. CK2 $\alpha'$  haploinsufficiency did not alter the number of MSNs  
237 (Ctip2<sup>+</sup> cells) or the mRNA levels of the MSN markers (Drd1 and Drd2), but increased  
238 the levels of synaptic proteins like the scaffold protein Dlg4 (PSD-95) and Ppp1rb1  
239 (dopamine- and cAMP-regulated neuronal phosphoprotein DARPP-32), a key regulator  
240 of the electrophysiological responses in striatal neurons (48, 49)(**Fig. S5A-C**). These  
241 data supported that astrocyte health can influence neuronal synaptic protein levels and  
242 excitability.

243 Glutamatergic synaptic transmission is often related to motor and cognitive function in  
244 HD mouse models (45, 49). We conducted a series of motor tests including accelerating  
245 rotarod and beam walk in WT, zQ175, and zQ175:CK2 $\alpha$ '<sup>(+/-)</sup> mice at 3, 6, and 12 months  
246 (**Fig. 5**). We also conducted cylinder and open field assessments on a different cohort  
247 at 12 months comparing zQ175 and zQ175:CK2 $\alpha$ '<sup>(+/-)</sup> (**Fig. S6**). We did not observe  
248 significant differences between WT and zQ175 or between zQ175 and zQ175:CK2 $\alpha$ '<sup>(+/-)</sup>  
249 at any tested age in the accelerating rotarod test (**Fig. 5A**), open field, or cylinder test  
250 (**Fig. S6**). However, when we evaluated fine motor coordination and whole body  
251 balance in the beam test, we observed a significant increase in foot slips of zQ175 mice  
252 compared to WT at 3 months, but only with the most challenging beam (small round),  
253 indicating early subtle motor deficits (**Fig. 5B**). At 12 months, zQ175 mice showed  
254 increased foot slips in both the small round and small square beams compared to WT,  
255 highlighting a worsening motor deficit. zQ175:CK2 $\alpha$ '<sup>(+/-)</sup> mice showed a significant  
256 reduction in foot slips compared to zQ175 mice at all tested ages and no significant  
257 differences compared to WT.

258 We also performed tests to evaluate associative learning (fear conditioning), spatial  
259 learning and memory (Barnes maze, BM), cognitive flexibility (BM reversal), and spatial  
260 working memory (Y radial arm maze) by comparing zQ175 and zQ175:CK2 $\alpha$ '<sup>(+/-)</sup> mice at  
261 12 months of age, but no significant differences were observed between the two groups  
262 (**Fig. S7**). This observation suggests that the positive effects of CK2 $\alpha$ ' depletion on  
263 motor behavior may not additionally translate to improved cognitive functions.

264

## 265 **CK2 $\alpha$ ' depletion rescued gene expression of synaptic genes connected to alpha-** 266 **synuclein**

267 To elucidate the mechanism by which CK2 $\alpha$ ' contributes to HD, we investigated which  
268 molecular pathways associated with HD could be specifically affected by CK2 $\alpha$ '  
269 haploinsufficiency. RNA-seq in the striatum of WT, zQ175, CK2 $\alpha$ '<sup>(+/-)</sup>, and  
270 zQ175:CK2 $\alpha$ '<sup>(+/-)</sup> mice at 12-14 months, followed by Weighted Gene Co-Expression  
271 Network Analysis (WGCNA), revealed that the mouse transcriptome could be clustered  
272 into 20 gene co-expression modules given the sample phenotypes (**Fig. S8, Table S1**).  
273 Out of the 20 modules, 9 modules showed a significant difference in eigengene  
274 expression between zQ175 and WT mice in a Kruskal-Wallis test (p value < 0.05) (**Fig.**  
275 **S9A, Table S2**). Further evaluation of those 9 modules revealed 2 modules  
276 (Greenyellow: 255 genes, and Red: 639 genes) were also significantly different between  
277 zQ175 and zQ175:CK2 $\alpha$ '<sup>(+/-)</sup> mice (p value < 0.05) (**Fig. 6A, Table S2**). Plots of module  
278 eigengene expression confirmed that Greenyellow (**Fig. 6B**) and Red modules (**Fig. S8**)  
279 were more consistent in the expression contrast between zQ175 mice and the rest of  
280 the genotypes. Cook's distance (DESeq2) analyses revealed that these differences  
281 were not due to the presence of outliers in our data set (**Fig. S9B**). Since the  
282 Greenyellow module demonstrated a higher significance over the Red module (**Fig.**  
283 **6A**), we decided to focus our analyses on the Greenyellow module. Ingenuity pathway  
284 analysis (IPA) indicated that the five most significant canonical pathways in the  
285 Greenyellow module were synaptogenesis signaling pathways (p-value 1.68E-06),

286 Ephrin A signaling (p-value 7.84E-05), glutamate receptor signaling (p-value 1.98E-04),  
287 axonal guidance signaling (p-value 7.13E-04), and G-protein coupled receptor (GPCR)  
288 signaling (p-value 1.14E-03) (**Fig. 6C, Fig. S9C**), all of which have been previously  
289 implicated in HD pathogenesis<sup>(50)</sup>. Additional Gene Ontology (GO) annotation of cellular  
290 components indicated that Greenyellow genes are significantly enriched in synaptic  
291 components (**Fig. 6D**).

292 Connectivity analyses (showing only 15% of the most highly connected members of the  
293 Greenyellow module) (**Fig. 6E**) revealed that the two most connected genes within the  
294 hub were Slit1 (Slit Guidance Ligand 1), associated with “poor” behavior and a worse  
295 prognosis in the R6/1 mouse model (51), and Ncald (Neurocalcin delta), which regulates  
296 multiple endocytosis-dependent neuronal functions and is situated on a locus that has  
297 been associated with earlier clinical onset of HD<sup>(52, 53)</sup>. To better understand which  
298 specific genes were more impacted in their expression by CK2 $\alpha'$  depletion, we  
299 examined the Differential Gene Expression (DGE) between control mice (WT and  
300 CK2 $\alpha'$ <sup>(+/-)</sup>) and HD mice (zQ175 and zQ175:CK2 $\alpha'$ <sup>(+/-)</sup>) (**Table S3**). The DGE between  
301 WT and zQ175 mice confirmed a large transcriptional dysregulation (n=885 genes,  
302 Q<0.1) (**Fig. S9D, E Table S3**), as previously reported<sup>(50)</sup>. Interestingly, the DGE  
303 between zQ175:CK2 $\alpha'$ <sup>(+/-)</sup> and WT mice only reported 123 genes, in contrast to the 885  
304 genes between zQ175 and WT (**Fig. S9F, G**). Since our sample distribution was not  
305 equally sex balanced, we then used R package variance Partition and confirmed that  
306 these expression changes were driven only by ‘genotype’ and not by ‘sex’ (**Fig. S9H**).

307 CK2 $\alpha'$  depletion decreased inflammation and improved astrocyte health. Therefore, we  
308 searched for microglial and astrocytic inflammatory RNA signatures in our data set (40).  
309 As Castro-Diaz et al., showed (43), we did not observe significant changes in the  
310 expression of these gene signatures even when comparing WT and zQ175 mice (**Fig.**  
311 **S10A, B, Table S4, S5**). The disconnection between changes in protein levels of  
312 inflammatory cytokines and the absence of transcriptional alterations in those genes  
313 could be explained by post-translational events potentially regulated by CK2 $\alpha'$ .  
314 However, we recapitulate some transcriptional changes for genes of the HD-associated  
315 astrocyte molecular signature in the zQ175 mice (43, 54), indicative of astrocytic  
316 dysfunction (**Fig. S10C**). Notably, these changes were not observed when comparing  
317 zQ175:CK2 $\alpha'$ <sup>(+/-)</sup> and WT mice.

318 The DGEs analyzed between zQ175 and zQ175:CK2 $\alpha'$ <sup>(+/-)</sup> mice revealed 39 specific  
319 and significant genes (FDR<0.1) (**Fig. 6F, Table S6**), including Csnk2a2 (CK2 $\alpha'$  gene)  
320 as a positive control. Three genes (Ncald, Nrp2, and Slc30a3) were also among the  
321 15% most highly connected members of the Greenyellow module (**Fig. 6E**). At least  
322 40% of the DGEs (n=16) were related to synaptic functions (**Fig. 6F, Table S6**). We  
323 performed an IPA on the 39 genes to query for biological meaning and found that the  
324 most significant canonical pathway was for glutamate receptor signaling (p-value 2.09E-  
325 03) (**Fig. 6A**). These pieces of data confirm the contribution of CK2 $\alpha'$  to the  
326 dysregulation of genes related to excitatory synaptic transmission in HD.

327 When looking at the most significant upstream regulators identified by IPA of both the  
328 Greenyellow module and the 39 gene set identified by DGE, we found SNCA (alpha-



329 synuclein) (p-value 9.10E-11 and 1.03E-07, respectively).  $\alpha$ -syn is a neuronal protein  
330 that regulates multiple processes, including synaptic vesicle trafficking and  
331 neurotransmitter release and transcription, and is associated with onset and  
332 progression of Parkinson's disease (55, 56).  $\alpha$ -syn was also shown to exert a toxic  
333 effect in R6/1 mice, but its mechanism of action has remained unknown(20, 25). IPA  
334 connected  $\alpha$ -syn with some of the most differentially dysregulated genes in the set of 39  
335 genes associated to synaptic functions including Ttr (Transthyretin), Grm2 (Glutamate  
336 Metabotropic Receptor 2), Slc17a7 (Solute Carrier Family 17 Member 7; alias VGlut1),  
337 C1q3 (Complement Component 1, Q Subcomponent-Like), Cckbr (cholecystokinin B  
338 receptor), Nrp2 (Neuropilin 2), and the transcription factors Tbr1 (T-Box Brain  
339 Transcription Factor 1) and Nr4a2 (Nuclear Receptor Subfamily 4 Group A Member 2;  
340 alias Nurr1) (**Fig. 6G, F**).

341 To determine the extent to which  $\alpha$ -syn participates in the regulation of genes identified  
342 in our IPA analyses (**Fig. 6G**), we used R6/1:SNCA<sup>KO</sup> mice (**Fig. S11**), previously  
343 shown to improve in motor behavior compared to R6/1 mice (20). RT-qPCR showed  
344 significant expression changes for SNCA, Nrp2, Cckbr, and Ttr between WT and R6/1  
345 mice. Lack of SNCA significantly decreased the expression of Slc30a3 and Grm2, and  
346 showed a trend toward decreased expression for Ttr and Cckbr in R6/1:SNCA<sup>KO</sup>  
347 compared to R6/1 mice. In addition, nearly all tested genes decreased their expression  
348 when comparing R6/1:SNCA<sup>KO</sup> to WT:SNCA<sup>KO</sup>. Altogether, this data suggested that  
349 transcriptional dysregulation of some synaptic genes in HD could be mediated by  $\alpha$ -syn  
350 dysfunction. Although some gene expression changes differed between R6/1 and  
351 zQ175 mice, the effects mediated by SNCA<sup>KO</sup> demonstrated a role of  $\alpha$ -syn in the  
352 regulation of the genes identified in our IPA analyses in HD.

353

### 354 **Striatal synucleinopathy is found in zQ175 mice and is reduced by CK2 $\alpha$ '** 355 **depletion**

356 We next explored whether CK2 $\alpha$ ' was involved in the regulation of  $\alpha$ -syn in HD. We  
357 observed that the total amount of  $\alpha$ -syn was similar between WT and zQ175 (**Fig. 7A-C**)  
358 mice. zQ175:CK2 $\alpha$ '<sup>(+/-)</sup> mice showed a trend towards increased  $\alpha$ -syn, but did not reach  
359 statistical significance (**Fig. 7B, C**). Nuclear and cytoplasm fractionation confirmed the  
360 presence of  $\alpha$ -syn in nuclear fractions from striatum samples (55, 57), and showed a  
361 modest but significant increase in nuclear  $\alpha$ -syn in zQ175 mice (**Fig. 7D, E**). IF analyses  
362 for  $\alpha$ -syn and HTT (EM48) also confirmed the colocalization between these two  
363 proteins, as previously shown in R6/1 mice (20)(**Fig. 7F, G**). To determine if there was a  
364 difference in the number and distribution of co-localized  $\alpha$ -syn/HTT, we first analyzed  
365 the number of EM48<sup>+</sup> puncta in both the nucleus and cytoplasm between zQ175 and  
366 zQ175:CK2 $\alpha$ '<sup>(+/-)</sup> mice. Cytoplasmic HTT aggregates were reduced in zQ175:CK2 $\alpha$ '<sup>(+/-)</sup>  
367 compared to zQ175 mice, consistent with previous studies (11), although no significant  
368 differences were observed in the number of nuclear HTT aggregates (**Fig. 7H, I**).  
369 Despite the decrease in cytoplasmic HTT aggregates in zQ175:CK2 $\alpha$ '<sup>(+/-)</sup> mice, no  
370 significant differences were observed in the number of nuclear and/or cytoplasmic  $\alpha$ -  
371 syn/HTT colocalized puncta between zQ175 and zQ175:CK2 $\alpha$ '<sup>(+/-)</sup> mice (**Fig. 7J**).

372 We then evaluated whether pS129- $\alpha$ -syn, a marker of synucleinopathy (58, 59), was  
373 altered in HD and whether CK2 $\alpha'$  could influence its levels. We observed that the levels  
374 of pS129- $\alpha$ -syn increased in the striatum of zQ175 mice at 12 months compared to WT  
375 (tested with 3 different pS129- $\alpha$ -syn antibodies: 81A, EP1536Y and D1R1R), and in the  
376 striatum of patients with HD (**Fig. 8A-E, Fig. S12A**), indicating signs of synucleinopathy.  
377 The levels of pS129- $\alpha$ -syn were significantly reduced in zQ175:CK2 $\alpha'^{+/-}$  mice  
378 compared to zQ175, while no significant differences were observed with WT mice (**Fig.**  
379 **8D, E, Fig. S12A-C**). pS129- $\alpha$ -syn was detected in both the cytoplasm and the nucleus  
380 of zQ175 striatal cells, while no nuclear presence was detected in zQ175:CK2 $\alpha'^{+/-}$  mice  
381 (**Fig. 8F, G**). In addition, we observed that pS129- $\alpha$ -syn colocalized with both  
382 cytoplasmic and nuclear HTT puncta in zQ175 mice, while only cytoplasmic  
383 colocalization was observed in zQ175:CK2 $\alpha'^{+/-}$  mice (**Fig. 8F, G, Suppl. Video 1**).

384

## 385 Discussion

386 Increased protein kinase CK2 activity has been associated with detrimental effects in  
387 protein homeostasis and neuroinflammation in different neurodegenerative diseases,  
388 including AD and PD (5). However, the role of CK2 in HD remained unclear. This study  
389 demonstrated the adverse effects of the catalytic subunit CK2 $\alpha'$  on neuroinflammation,  
390 protein aggregation, neuronal function, and motor behavior in the zQ175 HD mouse  
391 model and consolidated the important contribution of CK2 $\alpha'$  to HD pathogenesis. We  
392 also found this contribution is mediated, at least in part, by the ability of CK2 $\alpha'$  to  
393 phosphorylate  $\alpha$ -syn and induce striatal synucleinopathy and synaptic gene  
394 dysregulation (**Fig. 8H**).

395 We previously showed that CK2 $\alpha'$  levels were induced in the striatum of patients with  
396 HD, in MSN-like human iPSCs derived from patients with HD, and in zQ175 mouse  
397 MSNs (11). CK2 $\alpha'$  upregulation was associated with HD pathogenesis since CK2 $\alpha'$   
398 genetic knockdown in different HD cell models resulted in decreased HTT aggregation  
399 and increased cell viability(11). However, other studies using CK2 inhibitors suggested  
400 CK2 induction as a protective mechanism in HD (13, 14). These conflicting reports  
401 could be explained by the poor selectivity and high toxicity of previously used CK2  
402 inhibitors (60). Our study demonstrated that reducing levels of CK2 $\alpha'$  by removing one  
403 allele of the *Csnk2a2* (CK2 $\alpha'$ ) gene in the zQ175 heterozygous HD mouse model  
404 (zQ175:CK2 $\alpha'^{+/-}$ ) had significant and long-term benefits in several HD-related  
405 phenotypes. CK2 $\alpha'$  depletion significantly altered the production of several pro-  
406 inflammatory cytokines in the striatum of symptomatic zQ175 mice. The benefits of  
407 reducing neuroinflammation in HD have been shown in R6/2 mice intracranially injected  
408 with a TNF- $\alpha$  inhibitor, which resulted in a significant increase in neuronal density and  
409 improved motor function<sup>(61)</sup>. We obtained similar results when reducing the expression  
410 of CK2 $\alpha'$ , suggesting CK2 $\alpha'$  as a potential upstream regulator of neuroinflammation in  
411 HD.

412 Neuroinflammation is a coordinated response to brain toxicity, involving the activation of  
413 microglia and astrocytes. Increased reactive microglia were reported in numerous HD

414 mouse models <sup>(31, 33, 62)</sup> and in pre-symptomatic patients with HD (31, 32), and are often  
415 associated with increased pro-inflammatory cytokines (4). However, our microglia  
416 analyses failed to show robust microgliosis in zQ175 mice, consistent with previous  
417 studies (43), and did not indicate microglia as a relevant cell type responsible for the  
418 inflammatory profile observed in zQ175 or for the changes mediated by CK2 $\alpha'$   
419 depletion. On the contrary, we observed increased astrogliosis in zQ175 mice,  
420 manifested by an increased number of astrocytes and astrocytic pathology, which  
421 decreased in zQ175:CK2 $\alpha'$ <sup>(+/-)</sup>. Although it is unknown how CK2 $\alpha'$  influences astrocyte  
422 proliferation, it has been shown that specific cytokines like TNF- $\alpha$  and IL-6 have a  
423 proliferative effect on astrocytes (63) and therefore, CK2 $\alpha'$ -mediated changes in these  
424 cytokines could be responsible for these phenotypes in HD mice.

425 Accumulation of C3 and the C3 cleaved product, C3d, in HD astrocytes is canonically  
426 considered a marker of astrocytic pathology associated with neuroinflammation (40, 42,  
427 43). Liddelow et al., reported that astrocytes react to the presence of specific cytokines,  
428 such as IL-1 $\alpha$ , TNF- $\alpha$ , and C1q, by changing their transcriptional program and adopting  
429 a neurotoxic phenotype (A1), which is also characterized by the accumulation of C3d  
430 (40). Transcriptomic studies in purified HD astrocytes <sup>43</sup> and our own RNA-seq data  
431 have failed to identify transcriptional changes characteristic of A1 astrocytes, but  
432 instead revealed a transcriptional signature related to astrocytic dysfunction that is  
433 associated with the activation of C3d. In AD, expression of C3d in astrocytes is induced  
434 by neuroinflammatory processes triggered by amyloid-beta, and its activation  
435 contributes to protein aggregation and cell death(64). CK2 phosphorylates C3 and  
436 modulates its cleavage and activation(65). Therefore, CK2 $\alpha'$  levels, as well as CK2 $\alpha'$ -  
437 mediated neuroinflammation, could influence C3d accumulation in astrocytes and  
438 astrocytic pathology.

439 Increased pro-inflammatory cytokines can alter synaptic strength as well as  
440 glutamatergic transmission and are also associated with structural and functional  
441 disruption of synaptic compartments (66). Similarly, astrocyte dysfunction in HD  
442 contributes to reduced striatal glutamatergic transmission and spine density, ultimately  
443 decreasing MSN excitability(35, 46). We showed that CK2 $\alpha'$ -dependent decrease of  
444 inflammatory cytokines and astrogliosis correlated with increased expression of synaptic  
445 proteins (PSD-95 and Darpp-32) and improved AMPA-mediated synaptic transmission.  
446 Similarly, conditional deletion of mtHTT in astrocytes of BACHD mice rescued the  
447 expression of synaptic proteins and synaptic activity in the striatum and improved  
448 astrocyte health(46). However, whether decreased astrocytic pathology contributes to  
449 improved neuronal activity in zQ175:CK2 $\alpha'$ <sup>(+/-)</sup> mice is yet to be determined.

450 In contrast to CK2 $\alpha$ , which is an essential protein with hundreds of targets, CK2 $\alpha'$  has  
451 very few identified substrates (9, 67). We previously showed the stress protective  
452 transcription factor HSF1 as a substrate of CK2 $\alpha'$  (11). HSF1 is the master regulator of  
453 protein homeostasis in mammalian cells and has also been linked to the regulation of  
454 anti-inflammatory and synaptic processes (12). CK2 $\alpha'$  phosphorylates HSF1, signaling  
455 HSF1 for proteasomal degradation and influencing chaperone expression and HTT  
456 aggregation in cells and in HD mice (11). Our RNA-seq analysis validated the increased  
457 expression of chaperones like Hsp70 and Hsp25 in the zQ175:CK2 $\alpha'$ <sup>(+/-)</sup> mice,

458 consistent with previous findings (11). However, WGCNA and DGE did not reveal global  
459 changes in specific transcriptional pathways associated with protein quality control  
460 networks between zQ175 and zQ175:CK2 $\alpha'$ <sup>(+/-)</sup>, but instead showed two different  
461 modules (Greenyellow and Red) primarily corresponding to signaling pathways related  
462 to synaptogenesis and glutamate receptor signaling. SNCA ( $\alpha$ -syn) was indicated by  
463 IPA as one of the top putative upstream regulators of the CK2 $\alpha'$ -mediated  
464 transcriptional changes observed by WGCNA and DGE analyses. Although  $\alpha$ -syn is not  
465 a transcription factor, several reports have shown  $\alpha$ -syn has the ability to modulate the  
466 expression of transcription factors like Nurr1, which is involved in the regulation of  
467 inflammation and is differentially expressed between zQ175 and zQ175:CK2 $\alpha'$ <sup>(+/-)</sup> mice  
468 (55, 56).  $\alpha$ -syn aggregation is thought to be a key process in PD and other  
469 synucleinopathies and is promoted by the presence of high levels of  $\alpha$ -syn  
470 phosphorylation and ubiquitylation (59). In particular, pS129- $\alpha$ -syn phosphorylation  
471 regulates neurotransmitter uptake, notably dopamine as well as glutamate release,  
472 thereby playing an important role at synaptic terminals and modulating synaptic  
473 plasticity (59, 68).

474 The specific contribution of  $\alpha$ -syn dysregulation in HD has yet to be determined. It is  
475 known that  $\alpha$ -syn participates in HD pathogenesis because  $\alpha$ -syn KO mice have  
476 demonstrated decreased mtHTT aggregation and attenuated body weight loss and  
477 motor symptoms in R6/1 mice (20, 25). Interestingly, aggregation of  $\alpha$ -syn and  
478 consequent synucleinopathy in PD has been linked to the activation of CK2 and CK2-  
479 dependent phosphorylation, although it is unknown which CK2 subunit participates in  
480 this process (69).  $\alpha$ -syn has also been shown to influence cytokine production (70).  
481 Therefore, it is reasonable to hypothesize that CK2 $\alpha'$  could contribute to HD by  
482 increasing HTT aggregation via dysregulation of protein quality control mechanisms  
483 and/or increasing  $\alpha$ -syn phosphorylation. Here, we showed increased pS129- $\alpha$ -syn in  
484 the striatum of symptomatic HD mice and patients with HD as well as an increased  
485 localization of this phosphorylated form in the nucleus. Furthermore, we demonstrated  
486 that CK2 $\alpha'$  is involved in this process. Decreased phosphorylation and the accumulation  
487 of pS129- $\alpha$ -syn in the nucleus could be responsible for the rescue of  $\alpha$ -syn-associated  
488 transcriptional alterations and the improvement of synaptic function, cytokine  
489 expression, and astrocytic pathology seen in zQ175:CK2 $\alpha'$ <sup>(+/-)</sup> mice. Overall, these  
490 results provide strong evidence for CK2 $\alpha'$  playing an important role in many aspects of  
491 HD pathogenesis, supporting its potential as a therapeutic target in HD. Further  
492 experiments will be necessary to decipher the mechanism by which CK2 $\alpha'$ -mediated  $\alpha$ -  
493 synucleinopathy contributes to HD and to tease apart the differential contribution of HTT  
494 aggregation and  $\alpha$ -syn pathology to the symptomatology, onset, and progression of HD.

495

## 496 **Materials and Methods**

### 497 **Cell lines**

498 Mammalian cell lines used in this study were the mouse-derived striatal cells STHdh<sup>Q7</sup>  
499 and STHdh<sup>Q111</sup> (Coriell Cell Repositories). Cell lines were authenticated by

500 immunoblotting for the detection of mutant HTT protein. Cells were grown at 33°C in  
501 Dulbecco's modified Eagle's medium (DMEM, Genesee) supplemented with 10% fetal  
502 bovine serum (FBS), 100 U ml<sup>-1</sup> penicillin/streptomycin and 100 ug ml<sup>-1</sup> G418 (Gibco),  
503 as previously described (11).

504

### 505 **Mouse strains**

506 All reported data abides to the ARRIVE guidelines for reporting animal research. For  
507 this study we used a full-length knock-in mouse model of HD known as zQ175 on the  
508 C57BL/6J background (B6J.zQ175 KI mice (Stock No. 027410)), which harbors a  
509 chimeric human/mouse exon 1 carrying an expansion of ~188 CAG repeats and the  
510 human poly-proline region (27). WT (C57BL/6) animals were used as controls. CK2α'  
511 heterozygous mice (CK2α'<sup>(+/-)</sup>) on the 129/SvEv-C57BL/6J background (Taconic  
512 Biosciences TF3062) were originally obtained from Dr. Seldin (Boston University) (71).  
513 CK2α'<sup>(+/-)</sup> were crossbred with WT and zQ175 for more than 10 generations prior to  
514 selecting the founder animals of the study. All mice used have the C57BL/6J  
515 background. All mice were housed under standard SPF conditions in a conventional  
516 12:12 *light/dark* cycle. All experiments were conducted during the light cycle. Mice were  
517 bred as previously described<sup>11</sup> to generate the following genotypes: WT (CK2α'<sup>(+/+)</sup>  
518 HTT<sup>(0/0)</sup>), CK2α'<sup>(+/-)</sup> (CK2α'<sup>(+/-)</sup> HTT<sup>(0/0)</sup>), zQ175 (CK2α'<sup>(+/+)</sup> HTT<sup>(Tg/0)</sup>), zQ175;CK2α'<sup>(+/-)</sup>  
519 (CK2α'<sup>(+/-)</sup> HTT<sup>(Tg/0)</sup>). Animals were analyzed at 3, 6, 12, and 22 months of age. We also  
520 used samples from 5 month WT (mixed background CBA x C57BL/6), R6/1, SNCA<sup>KO</sup>,  
521 and R6/1SNCA<sup>KO</sup> obtained from Dr. Lucas. Sample size was set to a minimum of three  
522 animals per genotype for every analysis. When possible, at least two females and two  
523 males were used for each genotype and age. Littermates of the same sex were  
524 randomly assigned to experimental groups. All animal care and sacrifice procedures  
525 were approved by the University of Minnesota Institutional Animal Care and Use  
526 Committee (IACUC) in compliance with the National Institutes of Health guidelines for  
527 the care and use of laboratory animals under the approved animal protocol 2007-  
528 38316A.

529

### 530 **siRNA transfection**

531 For CK2α' knock-down, *STHdh* cells were transfected with FlexiTube siRNA (5 nmol)  
532 from Qiagen (Mm\_Csnk2a2; SI00961051; SI00961058; SI00961065; SI00961072)  
533 using DharmaFECT1 per manufacturer's guidelines. As a negative control, ON-  
534 TARGETplus control Non-targeting pool siRNA (Dharmacon) was used. Cells were  
535 collected 24 h after transfection for RNA extraction and RT-qPCR. All siRNAs have  
536 been validated by RT-qPCR and immunoblotting for knockdown efficiency of the target  
537 gene.

538

### 539 **RNA preparation and RT-qPCR**

540 RNA was extracted from *STHdh* cells and mouse striatal tissues by using the RNeasy  
541 extraction kit (Qiagen) according to the manufacturer's instructions. cDNA for all

542 samples was prepared from 1 µg RNA using the Superscript First Strand Synthesis  
543 System (Invitrogen) according to the manufacturer's instructions. SYBR green based  
544 PCR was performed with SYBR mix (Roche). The primer sequences for target genes  
545 were as follows: CK2α' forward: 5'- C G A C T G A T T G A T T G G G G T C T - 3' reverse: 5'-  
546 A G A A T G G C T C C T T T C G G A A T - 3', IL-6 forward: 5'- A G T T G C C T T C T T G G G A C T - 3'  
547 reverse: 5'- T C C A C G A T T T C C C A G A G A A C - 3', PSD-95 (Dlg4) forward: 5'-  
548 C C G A C A A G T T T G G A T C C T G T - 3', reverse: 5'- A C G G A T G A A G A T G G C G A T A G , Drd1  
549 forward: 5'- A A G A T G C C G A G G A T G A C A A C - 3', reverse: 5'-  
550 C C C T C T C C A A A G C T G A G A T G - 3', Drd2 forward: 5'- T A T G C C C T G G G T C G T C T A T C - 3',  
551 reverse: 5'- A G G A C A G G A C C C A G A C A A T G - 3', Darpp32(PPP1R1B) forward: 5'-  
552 C C A C C C A A A G T C G A A G A G A C - 3', reverse: 5'- G C T A A T G G T C T G C A G G T G C T - 3',  
553 GAPDH (used as an internal control gene) forward: 5'- A A C T T T G G C A T T G T G G A A G G -  
554 3' reverse: 5'- A C A C A T T G G G G G T A G G A A C A - 3'. The qPCR amplification was  
555 performed using the LightCycler 480 System (Roche). Each sample was tested in  
556 triplicate and normalized to GAPDH levels. For analysis, the  $2^{-\Delta\Delta C_t}$  method was used to  
557 calculate the relative fold gene expression of samples.  
558

## 559 Immunoblot analysis

560 Sample preparation and immunoblotting condition were performed as previously  
561 described (11). Striatum protein extracts from one hemisphere of mice were prepared in  
562 cell lysis buffer (25 mM Tris pH 7.4, 150 mM NaCl, 1 mM EDTA, 1% Triton-X100 and  
563 0.1% SDS). Extra SDS was added to the suspension to a final concentration of 2% (w  
564 per v) and lysates heated at 95°C for 5 min to solubilize tissue. Total tissue homogenate  
565 was then centrifuged at 12,000 r.p.m. for 10 min. Protein samples were separated on 4–  
566 20% SDS Criterion TGX Stain-Free gels (BioRad) at 110 V. Proteins were transferred to  
567 a nitrocellulose membrane (BioRad 0.2 µm) and blocked with 5% non-fat dry milk in  
568 TBS containing 0.25% Tween-20 (TBST) for 1 h at room temperature. Primary  
569 antibodies were anti-CK2α' (Rabbit, Novus NB100-379 and Proteintech 10606-1-AP,  
570 both 1:1000), anti-Iba1 (Rabbit, FUJIFILM Wako 019-19741, 1:1000), α-syn (Mouse,  
571 Biologend 834303, 1:1000, clone 4D6), pS129-α-syn (Mouse, Millipore MABN826,  
572 1:500, clone 81A and Rabbit, EP1536Y Abcam ab51253, 1:1000), GAPDH (Mouse,  
573 Santacruz sc-365062, 1:10000). Quantitative analyses were performed using ImageJ  
574 software and normalized to GAPDH controls.

575

## 576 Immunohistochemistry

577 Mice were anesthetized with Avertin (250 mg/kg Tribromoethanol) and perfused  
578 intracardially with 25mM Tris-base, 135mM NaCl, 3mM KCl, pH 7.6 supplemented with  
579 7.5 mM heparin. Brains were dissected, fixed with 4% PFA in TBS at 4°C for 4-5 days,  
580 cryoprotected with 30% sucrose in TBS for 4-5 days and embedded in a 2:1 mixture of  
581 30% sucrose in TBS:OCT (Tissue-Tek). Immunostaining was performed as previously  
582 described (11). Fluorescent images acquired on an epi-fluorescent microscope (Echo  
583 Revolve) or confocal microscope (Olympus FV1000). Primary antibodies used and

584 dilutions are as follows:  $\alpha$ -syn (Mouse, Biolegend 834303, 1:1000), pS129- $\alpha$ -syn  
585 (Mouse, Millipore MABN826, 1:500 and Rabbit, D1R1R Cell signaling technology  
586 23076S, 1:200), CK2 $\alpha'$  (Rabbit, Proteintech 10606-1-AP, 1:500), Ctip2 (Rat, Abcam  
587 ab18465, 1:500), complement component C3d (Goat, R&D Systems AF2655,  
588 1:200), Glial fibrillary acidic protein GFAP (Rabbit, Invitrogen PA1-10019, 1:500), S100  
589 Calcium Binding Protein B S100b (Rabbit, Abcam ab41548, 1:500), glutamine  
590 synthetase GS (Mouse, BD Biosciences 610517, 1:1000 and Rabbit, Abcam 49873,  
591 1:500), HTT (Mouse, Millipore, clone mEM48 Mab5374, 1:100, and Rabbit, Abcam  
592 ab109115, 1:500), Iba1 (Rabbit, FUJIFILM Wako 019-19741, 1:200), NeuN (Mouse,  
593 Millipore MAB377, 1:1000), IL-6 (Mouse, Santa Cruz Bio sc-32296, 1:100). For cell  
594 number (Ctip, GS, NeuN, Iba1, DAPI) the Cell counter plugin from ImageJ software was  
595 used and normalized to the image area (300 $\mu$ m<sup>2</sup>). EM48<sup>+</sup> aggregates were counted  
596 using annotations in the Echo Revolve software and validated using the Puncta  
597 Analyzer plugin in ImageJ. Number of pS129- $\alpha$ -syn/EM48 puncta was calculated using  
598 the Puncta Analyzer plugin in ImageJ.

599

## 600 **Cytokine and chemokine array**

601 The Proteome Profiler Mouse Cytokine Array Panel (ARY006, R&D Systems) was used  
602 to detect the levels of cytokine/chemokine of the mouse brain as per manufacturer's  
603 instructions. Frozen striatum from 12 - 14 months was homogenized in PBS containing  
604 Halt protease inhibitor cocktail and phosphatase inhibitors (Fisher Scientific) and 1%  
605 triton X-100 (Sigma). Samples were stored at -80°C for 15 min, thawed and centrifuged  
606 at 10,000  $\times$  g for 5 min to remove cell debris. A total of n=6 mice/genotype with a  
607 female(F)/male(M) ratio (3F/3M WT, 5F/1M zQ175, and 4F/2M zQ175:CK2 $\alpha'$ <sup>(+/-)</sup>) were  
608 analyzed. Samples were grouped in three different pools for each genotype: pools 1  
609 and 2 contained three different mice per genotype, pool 3 contained a randomized  
610 selection of 3 mice/genotype out the n=6 mice cohort. Similar numbers of male and  
611 female mice were evaluated. Data was analyzed using ImageJ software and presented  
612 as an average signal of three independent pool assays, calculating pairs of duplicate  
613 spots corresponding to 40 different cytokines or chemokines.

614

## 615 **Nuclear/Cytoplasm fractionation**

616 Frozen striatum samples (~20 mg) were fractionated using the Minute™ Cytosolic and  
617 Nuclear Extraction Kit for Frozen/Fresh tissues (Invent Biotechnologies INC, Cat NT-  
618 032) as per Manufacturer's instructions.

619

## 620 **Cresyl Violet staining**

621 Coronal brain slices were mounted on Fisherbrand Superfrost Plus Microscope Slide  
622 and dried at 37 °C overnight. Dried sections were incubated with 0.2% Cresyl violet  
623 acetate (Sigma #C5042) pH 3.7 for 8 minutes. Samples were then dehydrated in 80%,

624 95%, and 100% Ethanol solution for two minutes each followed by Xylene incubation.  
625 Slides were dried and mounted with permount (#SP15-500) and imaged on a Leica  
626 DM2500. Neurons were identified as round light blue cells and manually counted.

627

## 628 **Electrophysiological analyses**

629 Acute dorsolateral striatum coronal slices (350  $\mu\text{m}$  thick) were obtained from  
630 approximately 12 months old mice using a vibratome, and processed as previously  
631 described (72). Researchers were blind to the mouse genotype. The brain was quickly  
632 removed after decapitation and placed in ice-cold artificial cerebrospinal fluid (ACSF).  
633 Slices were incubated for at least 1h before use in a chamber at room temperature (21–  
634 24  $^{\circ}\text{C}$ ) in ACSF containing (in mM): NaCl 124, KCl 2.69,  $\text{KH}_2\text{PO}_4$  1.25,  $\text{MgSO}_4$  2,  
635  $\text{NaHCO}_3$  26,  $\text{CaCl}_2$  2, ascorbic acid 0.4, and glucose 10, and continuously bubbled with  
636 carbogen (95%  $\text{O}_2$  and 5%  $\text{CO}_2$ ) (pH 7.4). Slices were then transferred to an immersion  
637 recording chamber and superfused at 2 mL/min with gassed ACSF at 30-32  $^{\circ}\text{C}$  and  
638 visualized under an Olympus BX50WI microscope (Olympus Optical; Japan). To study  
639 excitatory postsynaptic currents (EPSCs) picrotoxin (50  $\mu\text{M}$ ) and CGP54626 (1  $\mu\text{M}$ )  
640 were added to the solution to block the  $\text{GABA}_A$  and  $\text{GABA}_B$  receptors, respectively.  
641 Whole-cell electrophysiological recordings were obtained from medium spiny neurons  
642 (MSNs) using patch electrodes (3–10  $\text{M}\Omega$ ) filled with an internal solution containing (in  
643 mM):  $\text{KMeSO}_4$  135, KCl 10, HEPES-K 10, NaCl 5, ATP-Mg 2.5, GTP-Na 0.3 (pH 7.3).  
644 Recordings were obtained with a PC-ONE amplifier (Dagan Instruments; Minneapolis,  
645 MN, USA). Membrane potentials were held at  $-70$  mV. Signals were filtered at 1 kHz,  
646 acquired at a 10 kHz sampling rate, and fed to a Digidata 1440A digitizer (Molecular  
647 Devices; San Jose, CA, USA). pCLAMP 10.4 (Axon Instruments, Molecular Devices;  
648 San Jose, CA, USA) was used for stimulus generation, data display, data acquisition,  
649 and data storage. To record evoked EPSCs, theta capillaries filled with ACSF were  
650 used for bipolar stimulation and placed in the vicinity of the cell patched in the  
651 dorsolateral striatum. Input–output curves of EPSCs were made by increasing stimulus  
652 intensities from 0 to 100  $\mu\text{A}$ . Paired-pulse facilitation was done by applying paired  
653 pulses (2 ms duration) with 25, 50, 75, 100, 200, 300, and 500 ms inter-pulse intervals.  
654 The paired-pulse ratio was calculated by dividing the amplitude of the second EPSC by  
655 the first (PPR=EPSC-2/EPSC-1). Synaptic fatigue was assessed by applying 30  
656 consecutive stimuli in 15 ms intervals. For miniature EPSCs (mEPSCs) tetrodotoxin  
657 (TTX; 1  $\mu\text{M}$ ) was added to the solution.

658

## 659 **Magnetic resonance imaging and spectroscopy**

660 Animal Preparation for MR Scanning: Researchers were blinded to the genotype of the  
661 mice during testing. Animals were induced with 3% isoflurane in a 1:1 mixture of  
662  $\text{O}_2$ : $\text{N}_2\text{O}$ . Mice were secured in a custom-built mouse holder and physiological status was  
663 monitored (SA Instruments) and recorded. Anesthesia was maintained with 1.5-2%  
664 isoflurane to achieve a respiration rate of 70-100 breaths per minute. Body temperature



665 was maintained at 36-37°C with a circulating warm water system and a heating fan  
666 controlled by feedback received from a fiber-optic rectal thermometer. The scan session  
667 was approximately 50 minutes for each animal. MR Protocol: All experiments were  
668 performed on a 9.4T/31 cm scanner (Agilent), as described previously (73). See  
669 **Supplementary Methods** for details.

670

## 671 **Measurement of striatal volume**

672 For volumetric analysis of striatum, coronal RARE images were used. The images had  
673 an in-plane resolution of 0.125 mm x 0.125 mm and 1 mm slice thickness. All volumetric  
674 quantifications were performed using ImageJ. The perimeter of the striatum was traced  
675 using a polygon selection tool and the volume measurement was performed by running  
676 Measure Stack plugin on ImageJ. All quantitative analyses were conducted blindly with  
677 respect to mouse genotype.

678

## 679 **Behavioral assays**

680 Researchers at the Mouse Behavioral core at University of Minnesota were blind to the  
681 genotypes of the mice during testing. Mice were transported from their colony room in  
682 their home cages to the behavioral testing room, where they were allowed to acclimate  
683 for at least one hour prior to the beginning of the experiment. See **Supplementary**  
684 **Methods** for a complete description of all behavioral tests conducted in the study.

685 *Beam Walk*: The deficits of motor coordination were assessed by a beam walking test  
686 which measures a mouse's ability to maintain balance while traversing a narrow beam  
687 to reach a safe platform. For this, 19-mm (medium-round) or 10-mm (small-round)  
688 diameter and 16-mm (medium-Square) or 10-mm (small-Square) width of 3 feet long  
689 wood beams (made in house) were used and placed 19 inches above the test bench by  
690 metal supports. Each mouse was placed on the beam at one end and allowed to walk to  
691 the goal box. Foot slips were recorded manually when the hind paws slipped off the  
692 beam. Testing included 3 training days with 4 consecutive trials. The performance was  
693 measured by recording the time of traversing the beam and the number of paw faults or  
694 slips from the beam. Maximum length of time per trial was 60 s; trials that exceeded 60  
695 s (e.g. a mouse failed to cross the finish line within a minute) were recorded as 60 s.

696 *Rotarod*: It is a standard test of motor coordination and balance in rodents. Mice were  
697 tested over 3 consecutive days. Each daily session included a single training trial of 15  
698 min at 5 RPM on the rotarod apparatus (Ugo Basile). On day 3, the animals were tested  
699 for 3 consecutive accelerating trials of 5 min with the rotarod speed changing from 5 to  
700 50 RPM over 300 s, with an inter-trial interval of at least 15 min. The latency to fall from  
701 the rod was recorded for each trial with mice remaining on the rod for more than 300 s  
702 removed and scored at 300 s.

703

## 704 RNA-Seq Analyses

705 Gene expression analysis was carried out using the CHURP pipeline  
706 ([HTTps://doi.org/10.1145/3332186.3333156](https://doi.org/10.1145/3332186.3333156)) using n=5 mice/genotype for WT, zQ175,  
707 and zQ175:CK2 $\alpha^{(+/-)}$  and n=3 mice for CK2 $\alpha^{(+/-)}$ , with a female (F)/male (M) ratio:  
708 4F/1M WT, 1F/2M CK2 $\alpha^{(+/-)}$ , 2F/3M zQ175, 4F/1M zQ175:CK2 $\alpha^{(+/-)}$ . Read quality was  
709 assessed using FastQC ([HTTp://www.bioinformatics.bbsrc.ac.uk/projects/fastqc](http://www.bioinformatics.bbsrc.ac.uk/projects/fastqc)). Raw  
710 reads were then trimmed to remove low quality 3' ends and adaptor contamination  
711 using Trimmomatic with the following parameter:  
712 ILLUMINACLIP:all\_illumina\_adapters.fa:4:15:7:2:true LEADING:3 TRAILING:3  
713 SLIDINGWINDOW:4:15 MINLEN:18 (74). Processed reads were aligned to mouse  
714 reference genome GRCm38 via HiSat2 (PMID: 31375807) using default parameters.  
715 Post-alignment cleaning removed duplicated mapping, unmapped reads, and reads with  
716 MAPQ<60. Gene-level expressions were quantified using Subread (PMID: 24227677),  
717 and differential gene expression was determined with DESeq2 using default setting  
718 (PMID: 25516281). Genes with a q < 0.1 were considered significant. Outliers'  
719 identification was performed using Cook's distance (DESeq2), which is a measure of  
720 how much a single sample is influencing the fitted coefficients for a gene. Driver factors  
721 of gene expression variance (genotype and/or sex) were evaluated using R package  
722 variance Partition. Pathway and clustering analysis were completed with Ingenuity  
723 Pathway Analysis (Ingenuity Systems: RRID: SCR\_008653) and gProfiler2 (PMID:  
724 31066453). Data visualization was done using various R graphic packages, including  
725 ggplot2, ggraph, and DESeq2 visualization functions. The RNA-seq data set generated  
726 in this manuscript has been deposited at GEO (accession number GSE160586).  
727 Reviewer token "gpqrigisbxgprqf".

728

## 729 WGCNA Analysis

730 Genes with less than 10 counts in more than 90% of samples were removed from  
731 WGCNA analysis (75). The count-based gene expressions were first transformed using  
732 a variance stabilizing method via DESeq2 vst function. The WGCNA R package (v1.69)  
733 was used to construct an unsigned gene co-expression network with a soft threshold  
734 power [beta] of 6. Nineteen tightly connected modules were detected, while genes that  
735 were not connected to the 19 modules were collected in the 20<sup>th</sup> "grey" module.  
736 WGCNA defines the expression of a given module by averaging module gene  
737 expressions, which is also called module eigengene expression. Using a non-  
738 parametric Kruskal-Wallis test (p value < 0.05), we can identify modules that differ  
739 significantly among mouse samples with different genotypes. For example, the  
740 "Greenyellow" module differs significantly between zQ175 mice and zQ175:CK2 $\alpha^{(+/-)}$   
741 mice. Data for the Greenyellow module were exported using a Cytoscape format for  
742 visualization. Network figures are limited to the top 10% of genes with the strongest  
743 network connections (the topological overlap threshold was raised until only 10% of  
744 genes remained). The network modules are color coded by the differential expression  
745 between zQ175 mice and zQ175:CK2 $\alpha^{(+/-)}$  mice: blue, downregulated in zQ175  
746 compared to ZQ175:CK2 $\alpha^{(+/-)}$  mice; red, upregulated in zQ175 compared to

747 ZQ175:CK2 $\alpha^{(+/-)}$ . The size of the circles is scaled by the absolute value of the mean  
748 log<sub>2</sub> fold change between zQ175 and ZQ175:CK2 $\alpha^{(+/-)}$  mice.

749

## 750 **Quantification and Statistical analyses**

751 Data are expressed as Mean  $\pm$  SEM, Mean  $\pm$  SD, or percentage, analyzed for statistical  
752 significance, and displayed by Prism 8 software (GraphPad, San Diego, CA) or Excel  
753 software (Microsoft). Pearson correlation tests were applied to test the normal  
754 distribution of experimental data. Normal distributions were compared with t-test (two-  
755 tailed) or ANOVA with appropriate post-hoc tests (Sidak's, Dunn's, or Tukey's) for  
756 multiple comparisons. Non-normal distributions were compared with the non-parametric  
757 Kruskal-Wallis test with an appropriate post-hoc test, as indicated. The accepted level of  
758 significance was  $p \leq 0.05$ , therefore samples indicated as n.s (no significant) did not  
759 reach  $p \leq 0.05$ . Statistical analyses for electrophysiological experiments were performed  
760 with SigmaPlot 13.0 software. No statistical methods were used to predetermine sample  
761 sizes, but sample sizes were chosen to be similar to those reported in previous  
762 publications<sup>11</sup>. In the figures, we show the mean as an estimator of central tendency  
763 including when we have used a non-parametric test, to maintain consistency with other  
764 figures in the paper and because it is more intuitive to compare the mean values.

765

## 766 **Acknowledgements**

767

768 We are grateful to Drs. Sylvain Lesne and Michael Lee for sharing his expertise on  
769 alpha-synuclein and sharing reagents, Maha Syed and Joyce Meints for technical  
770 assistance, Jason Mitchell for assistance with confocal microscopy and Erin Greguske  
771 for proofreading.

772

## 773 **Authors' contributions**

774

775 R.G.P obtained funding for the study and designed the experiments. D.Y and N.Z,  
776 harvested mice, conducted behavioral analyses, performed IF and conducted alpha-  
777 synuclein related experiments. F.C conducted cytokine proteome profiling and astrocyte  
778 IF analyses. J.Y performed EM48 and Neu analyses. T.B conducted microglia analyses.  
779 W.T conducted IL6-related experiments and qRT-PCR of SNCA<sup>KO</sup> mice. K.J performed  
780 striatal qRT-PCR. H.K conducted striatal volume analyses. C.N conducted  
781 electrophysiological experiments. T.S.M conducted behavioral analyses. K.G and S.L  
782 performed MRS analyses. A.W conducted a-syn IB and nuclear/cytoplasmic  
783 fractionation. R.M assisted in IF image analyses and a-syn/EM48 puncta analyses.

784 C.T.Z prepared SNCA<sup>KO</sup> tissues. Y.Z conducted RNA-seq analyses. D.Y, N.Z, R.M, S.L,  
785 K.G, C.N, W.T and R.G.P prepared and analyzed the data. G.O supervised the MR data  
786 acquisition and analysis. M.B supervised mouse behavioral data acquisition and  
787 analysis. A.A supervised electrophysiological recordings. M.C supervised microglia  
788 analyses. J.J.L supervised SNCA<sup>KO</sup> tissue preparation. R.G.P wrote the first draft of the  
789 manuscript and all authors edited subsequent versions. All authors read and approved  
790 the final version of the manuscript.

791

## 792 **Funding**

793 This work was supported by R.G.P's startup funds from University of Minnesota, the  
794 Biomedical Research Awards for Interdisciplinary New Science BRAINS (to R.G.P) and  
795 the National Institute of Health NINDS (R01 NS110694-01A1) (to R.G.P). The Center  
796 for Magnetic Resonance Research is supported by the National Institute of Biomedical  
797 Imaging and Bioengineering (NIBIB) grant P41 EB027061, the Institutional Center  
798 Cores for Advanced Neuroimaging award P30 NS076408 and the W.M. Keck  
799 Foundation. F.C. received the mobility scholarship program Global Links: an  
800 Opportunity to Build a University Strategy 2018/2019 (GLOBUS Placement), Università  
801 degli Studi di Cagliari, funded through the Regione Autonoma della Sardegna. National  
802 Institute of Health NINDS (R01 NS197387) (to M.C.) and National Institute of Health  
803 NINDS R01 MH119355 and R01 NS108686 (to A.A). Grants from Fundación Ramón  
804 Areces, MICINN (SAF2009-08233) and MCIU/AEI/FEDER-UE (RTI2018-096322-B-100)  
805 to J.J.L.

806

## 807 **Data availability**

808 RNA-seq data sets have been deposited at GEO. Mouse models and reagents  
809 regenerated during the execution of this work are available upon request.

810

## 811 **Declaration of interest**

812 The authors declare no competing interests.

813

## 814 **References**

815

- 816 1. T. H. s. D. C. R. Group, A novel gene containing a trinucleotide repeat that is  
817 expanded and unstable on Huntington's disease chromosomes. *Cell* **72**, 971-983  
818 (1993).
- 819 2. M. DiFiglia *et al.*, Aggregation of huntingtin in neuronal intranuclear inclusions  
820 and dystrophic neurites in brain. *Science* **277**, 1990-1993 (1997).

- 821 3. R. J. Ferrante, N. W. Kowall, E. P. Richardson, Proliferative and degenerative  
822 changes in striatal spiny neurons in Huntington's disease: a combined study using the  
823 section-Golgi method and calbindin D28k immunocytochemistry. *J Neurosci* **11**, 3877-  
824 3887 (1991).
- 825 4. A. Crotti, C. K. Glass, The choreography of neuroinflammation in Huntington's  
826 disease. *Trends Immunol* **36**, 364-373 (2015).
- 827 5. J. Castello, A. Ragnauth, E. Friedman, H. Rebholz, CK2-An Emerging Target for  
828 Neurological and Psychiatric Disorders. *Pharmaceuticals (Basel)* **10** (2017).
- 829 6. A. F. Rosenberger *et al.*, Increased occurrence of protein kinase CK2 in  
830 astrocytes in Alzheimer's disease pathology. *J. Neuroinflammation*. **13**, 4 (2016).
- 831 7. L. A. Pinna, Protein kinase CK2: a challenge to canons. *J. Cell Sci.* **115**, 3873-  
832 3878 (2002).
- 833 8. D. W. Litchfield, Protein kinase CK2: structure, regulation and role in cellular  
834 decisions of life and death. *Biochem. J.* **369**, 1-15 (2003).
- 835 9. Y. Bian *et al.*, Global screening of CK2 kinase substrates by an integrated  
836 phosphoproteomics workflow. *Sci. Rep.* **3**, 3460 (2013).
- 837 10. I. Ceglia, M. Flajolet, H. Rebholz, Predominance of CK2 $\alpha$  over CK2 $\alpha'$  in the  
838 mammalian brain. *Mol Cell Biochem* **356**, 169-175 (2011).
- 839 11. R. Gomez-Pastor *et al.*, Abnormal degradation of the neuronal stress-protective  
840 transcription factor HSF1 in Huntington's disease. *Nat Commun* **8**, 14405 (2017).
- 841 12. R. Gomez-Pastor, E. T. Burchfiel, D. J. Thiele, Regulation of heat shock  
842 transcription factors and their roles in physiology and disease. *Nat Rev Mol Cell Biol*  
843 (2018).
- 844 13. M. M. Fan, H. Zhang, M. R. Hayden, S. L. Pelech, L. A. Raymond, Protective up-  
845 regulation of CK2 by mutant huntingtin in cells co-expressing NMDA receptors. *J*  
846 *Neurochem* **104**, 790-805 (2008).
- 847 14. R. S. Atwal *et al.*, Kinase inhibitors modulate huntingtin cell localization and  
848 toxicity. *Nat. Chem. Biol.* **7**, 453-460 (2011).
- 849 15. J. A. Greenwood, C. W. Scott, R. C. Spreen, C. B. Caputo, G. V. Johnson,  
850 Casein kinase II preferentially phosphorylates human tau isoforms containing an amino-  
851 terminal insert. Identification of threonine 39 as the primary phosphate acceptor. *J Biol*  
852 *Chem* **269**, 4373-4380 (1994).
- 853 16. E. Masliah *et al.*, Casein kinase II alteration precedes tau accumulation in tangle  
854 formation. *Am. J. Pathol.* **140**, 263-268 (1992).
- 855 17. E. A. Waxman, B. I. Giasson, Specificity and regulation of casein kinase-  
856 mediated phosphorylation of alpha-synuclein. *J Neuropathol Exp Neurol* **67**, 402-416  
857 (2008).
- 858 18. C. Ising *et al.*, NLRP3 inflammasome activation drives tau pathology. *Nature* **575**,  
859 669-673 (2019).
- 860 19. E. Masliah *et al.*, Dopaminergic loss and inclusion body formation in alpha-  
861 synuclein mice: implications for neurodegenerative disorders. *Science* **287**, 1265-1269  
862 (2000).
- 863 20. C. Tomás-Zapico *et al.*,  $\alpha$ -Synuclein accumulates in huntingtin inclusions but  
864 forms independent filaments and its deficiency attenuates early phenotype in a mouse  
865 model of Huntington's disease. *Hum Mol Genet* **21**, 495-510 (2012).

- 866 21. M. Fernández-Nogales *et al.*, Huntington's disease is a four-repeat tauopathy  
867 with tau nuclear rods. *Nat Med* **20**, 881-885 (2014).
- 868 22. P. Liu *et al.*, A soluble truncated tau species related to cognitive dysfunction is  
869 elevated in the brain of cognitively impaired human individuals. *Sci Rep* **10**, 3869  
870 (2020).
- 871 23. A. Shalash *et al.*, Elevated Serum  $\alpha$ -Synuclein Autoantibodies in Patients with  
872 Parkinson's Disease Relative to Alzheimer's Disease and Controls. *Front Neurol* **8**, 720  
873 (2017).
- 874 24. M. Breza *et al.*, Elevated Serum  $\alpha$ -Synuclein Levels in Huntington's Disease  
875 Patients. *Neuroscience* **431**, 34-39 (2020).
- 876 25. S. Corrochano *et al.*,  $\alpha$ -Synuclein levels affect autophagosome numbers in vivo  
877 and modulate Huntington disease pathology. *Autophagy* **8**, 431-432 (2012).
- 878 26. T. Heikkinen *et al.*, Characterization of neurophysiological and behavioral  
879 changes, MRI brain volumetry and <sup>1</sup>H MRS in zQ175 knock-in mouse model of  
880 Huntington's disease. *PLoS One* **7**, e50717 (2012).
- 881 27. L. B. Menalled *et al.*, Comprehensive behavioral and molecular characterization  
882 of a new knock-in mouse model of Huntington's disease: zQ175. *PLoS One* **7**, e49838  
883 (2012).
- 884 28. P. Arlotta, B. J. Molyneaux, D. Jabaudon, Y. Yoshida, J. D. Macklis, Ctip2  
885 controls the differentiation of medium spiny neurons and the establishment of the  
886 cellular architecture of the striatum. *J Neurosci* **28**, 622-632 (2008).
- 887 29. N. N. Singh, D. P. Ramji, Protein kinase CK2, an important regulator of the  
888 inflammatory response? *J Mol Med (Berl)* **86**, 887-897 (2008).
- 889 30. F. B. Rodrigues *et al.*, Cerebrospinal Fluid Inflammatory Biomarkers Reflect  
890 Clinical Severity in Huntington's Disease. *PLoS One* **11**, e0163479 (2016).
- 891 31. N. Pavese *et al.*, Microglial activation correlates with severity in Huntington  
892 disease: a clinical and PET study. *Neurology* **66**, 1638-1643 (2006).
- 893 32. Y. F. Tai *et al.*, Imaging microglial activation in Huntington's disease. *Brain Res*  
894 *Bull* **72**, 148-151 (2007).
- 895 33. J. C. Savage *et al.*, Microglial physiological properties and interactions with  
896 synapses are altered at presymptomatic stages in a mouse model of Huntington's  
897 disease pathology. *J Neuroinflammation* **17**, 98 (2020).
- 898 34. K. Li, J. Li, J. Zheng, S. Qin, Reactive Astrocytes in Neurodegenerative  
899 Diseases. *Aging Dis* **10**, 664-675 (2019).
- 900 35. B. S. Khakh *et al.*, Unravelling and Exploiting Astrocyte Dysfunction in  
901 Huntington's Disease. *Trends Neurosci* **40**, 422-437 (2017).
- 902 36. M. Castillo, L. Kwock, J. Scatliff, S. K. Mukherji, Proton MR spectroscopy in  
903 neoplastic and non-neoplastic brain disorders. *Magn Reson Imaging Clin N Am* **6**, 1-20  
904 (1998).
- 905 37. A. Brand, C. Richter-Landsberg, D. Leibfritz, Multinuclear NMR studies on the  
906 energy metabolism of glial and neuronal cells. *Dev Neurosci* **15**, 289-298 (1993).
- 907 38. I. Tkac *et al.*, Homeostatic adaptations in brain energy metabolism in mouse  
908 models of Huntington disease. *J Cereb Blood Flow Metab* **32**, 1977-1988 (2012).
- 909 39. Q. Peng *et al.*, Characterization of Behavioral, Neuropathological, Brain  
910 Metabolic and Key Molecular Changes in zQ175 Knock-In Mouse Model of Huntington's  
911 Disease. *PLoS One* **11**, e0148839 (2016).

- 912 40. S. A. Liddelow *et al.*, Neurotoxic reactive astrocytes are induced by activated  
913 microglia. *Nature* **541**, 481-487 (2017).
- 914 41. L. E. Clarke *et al.*, Normal aging induces A1-like astrocyte reactivity. *Proc Natl*  
915 *Acad Sci U S A* **115**, E1896-E1905 (2018).
- 916 42. S. K. Singhrao, J. W. Neal, B. P. Morgan, P. Gasque, Increased complement  
917 biosynthesis by microglia and complement activation on neurons in Huntington's  
918 disease. *Exp Neurol* **159**, 362-376 (1999).
- 919 43. B. Diaz-Castro, M. R. Gangwani, X. Yu, G. Coppola, B. S. Khakh, Astrocyte  
920 molecular signatures in Huntington's disease. *Sci Transl Med* **11** (2019).
- 921 44. M. M. Zeron *et al.*, Increased sensitivity to N-methyl-D-aspartate receptor-  
922 mediated excitotoxicity in a mouse model of Huntington's disease. *Neuron* **33**, 849-860  
923 (2002).
- 924 45. A. I. Smith-Dijak, M. D. Sepers, L. A. Raymond, Alterations in synaptic function  
925 and plasticity in Huntington disease. *J Neurochem* **150**, 346-365 (2019).
- 926 46. T. E. Wood *et al.*, Mutant huntingtin reduction in astrocytes slows disease  
927 progression in the BACHD conditional Huntington's disease mouse model. *Hum Mol*  
928 *Genet* **28**, 487-500 (2019).
- 929 47. T. Indersmitten, C. H. Tran, C. T. Cepeda, M. S. Levine, Altered Excitatory and  
930 Inhibitory Inputs to Striatal Medium-Sized Spiny Neurons and Cortical Pyramidal  
931 Neurons in the Q175 Mouse Model of Huntington's Disease. *J. Neurophysiol.*, jn (2015).
- 932 48. A. A. Fienberg *et al.*, DARPP-32: regulator of the efficacy of dopaminergic  
933 neurotransmission. *Science* **281**, 838-842 (1998).
- 934 49. E. Vezzoli *et al.*, Inhibiting pathologically active ADAM10 rescues synaptic and  
935 cognitive decline in Huntington's disease. *J Clin Invest* **129**, 2390-2403 (2019).
- 936 50. P. Langfelder *et al.*, Integrated genomics and proteomics define huntingtin CAG  
937 length-dependent networks in mice. *Nat Neurosci* **19**, 623-633 (2016).
- 938 51. A. Gallardo-Orihuela *et al.*, Transcriptional correlates of the pathological  
939 phenotype in a Huntington's disease mouse model. *Sci Rep* **9**, 18696 (2019).
- 940 52. G. M. o. H. s. D. G.-H. Consortium, Identification of Genetic Factors that Modify  
941 Clinical Onset of Huntington's Disease. *Cell* **162**, 516-526 (2015).
- 942 53. M. Riessland *et al.*, Neurocalcin Delta Suppression Protects against Spinal  
943 Muscular Atrophy in Humans and across Species by Restoring Impaired Endocytosis.  
944 *Am J Hum Genet* **100**, 297-315 (2017).
- 945 54. O. Al-Dalahmah *et al.*, Single-nucleus RNA-seq identifies Huntington disease  
946 astrocyte states. *Acta Neuropathol Commun* **8**, 19 (2020).
- 947 55. D. Davidi *et al.*,  $\alpha$ -Synuclein Translocates to the Nucleus to Activate Retinoic-  
948 Acid-Dependent Gene Transcription. *iScience* **23**, 100910 (2020).
- 949 56. M. Decressac *et al.*,  $\alpha$ -Synuclein-induced down-regulation of Nurr1 disrupts  
950 GDNF signaling in nigral dopamine neurons. *Sci Transl Med* **4**, 163ra156 (2012).
- 951 57. M. W. Rousseaux *et al.*, TRIM28 regulates the nuclear accumulation and toxicity  
952 of both alpha-synuclein and tau. *Elife* **5** (2016).
- 953 58. A. Oueslati, Implication of Alpha-Synuclein Phosphorylation at S129 in  
954 Synucleinopathies: What Have We Learned in the Last Decade? *J Parkinsons Dis* **6**,  
955 39-51 (2016).
- 956 59. H. Fujiwara *et al.*, alpha-Synuclein is phosphorylated in synucleinopathy lesions.  
957 *Nat. Cell Biol.* **4**, 160-164 (2002).

- 958 60. M. Mikula *et al.*, Halogenated imidazole derivatives block RNA polymerase II  
959 elongation along mitogen inducible genes. *BMC Mol Biol* **11**, 4 (2010).
- 960 61. H. Y. Hsiao *et al.*, Inhibition of soluble tumor necrosis factor is therapeutic in  
961 Huntington's disease. *Hum Mol Genet* **23**, 4328-4344 (2014).
- 962 62. S. Franciosi *et al.*, Age-dependent neurovascular abnormalities and altered  
963 microglial morphology in the YAC128 mouse model of Huntington disease. *Neurobiol*  
964 *Dis* **45**, 438-449 (2012).
- 965 63. K. W. Selmaj, M. Farooq, W. T. Norton, C. S. Raine, C. F. Brosnan, Proliferation  
966 of astrocytes in vitro in response to cytokines. A primary role for tumor necrosis factor. *J*  
967 *Immunol* **144**, 129-135 (1990).
- 968 64. H. Lian *et al.*, Astrocyte-Microglia Cross Talk through Complement Activation  
969 Modulates Amyloid Pathology in Mouse Models of Alzheimer's Disease. *J Neurosci* **36**,  
970 577-589 (2016).
- 971 65. K. Nilsson Ekdahl, B. Nilsson, Phosphorylation of complement component C3  
972 after synthesis in U937 cells by a putative protein kinase, casein kinase 2, which is  
973 regulated by CD11b: evidence that membrane-bound proteases preferentially cleave  
974 phosphorylated C3. *Biochem J* **328 ( Pt 2)**, 625-633 (1997).
- 975 66. A. Mottahedin *et al.*, Effect of Neuroinflammation on Synaptic Organization and  
976 Function in the Developing Brain: Implications for Neurodevelopmental and  
977 Neurodegenerative Disorders. *Front Cell Neurosci* **11**, 190 (2017).
- 978 67. C. Franchin *et al.*, Re-evaluation of protein kinase CK2 pleiotropy: new insights  
979 provided by a phosphoproteomics analysis of CK2 knockout cells. *Cell Mol Life Sci* **75**,  
980 2011-2026 (2018).
- 981 68. S. Hara *et al.*, Serine 129 phosphorylation of membrane-associated  $\alpha$ -synuclein  
982 modulates dopamine transporter function in a G protein-coupled receptor kinase-  
983 dependent manner. *Mol Biol Cell* **24**, 1649-1660, S1641-1643 (2013).
- 984 69. G. Lee *et al.*, Casein kinase II-mediated phosphorylation regulates alpha-  
985 synuclein/synphilin-1 interaction and inclusion body formation. *J Biol Chem* **279**, 6834-  
986 6839 (2004).
- 987 70. C. Y. Chung, J. B. Koprach, H. Siddiqi, O. Isacson, Dynamic changes in  
988 presynaptic and axonal transport proteins combined with striatal neuroinflammation  
989 precede dopaminergic neuronal loss in a rat model of AAV alpha-synucleinopathy. *J*  
990 *Neurosci* **29**, 3365-3373 (2009).
- 991 71. X. Xu, P. A. Toselli, L. D. Russell, D. C. Seldin, Globozoospermia in mice lacking  
992 the casein kinase II alpha' catalytic subunit. *Nat. Genet.* **23**, 118-121 (1999).
- 993 72. A. Cavaccini, C. Durkee, P. Kofuji, R. Tonini, A. Araque, Astrocyte Signaling  
994 Gates Long-Term Depression at Corticostriatal Synapses of the Direct Pathway. *J*  
995 *Neurosci* **40**, 5757-5768 (2020).
- 996 73. G. Öz *et al.*, Assessing recovery from neurodegeneration in spinocerebellar  
997 ataxia 1: Comparison of in vivo magnetic resonance spectroscopy with motor testing,  
998 gene expression and histology. *Neurobiol Dis* **74**, 158-166 (2015).
- 999 74. A. M. Bolger, M. Lohse, B. Usadel, Trimmomatic: a flexible trimmer for Illumina  
1000 sequence data. *Bioinformatics* **30**, 2114-2120 (2014).
- 1001 75. P. Langfelder, S. Horvath, WGCNA: an R package for weighted correlation  
1002 network analysis. *BMC Bioinformatics* **9**, 559 (2008).



1004 **Figure Legends**

1005

1006 **Figure 1. CK2 $\alpha'$  levels progressively increase in the striatum of zQ175 and**  
1007 **correlate with HTT aggregation and NeuN depletion. A, B,** Immunostaining and  
1008 quantification of HTT puncta detected with anti-HTT EM48 antibody, **C, D,** NeuN<sup>+</sup> cells  
1009 and **E, F,** CK2 $\alpha'$  levels in zQ175 compared with WT mice at 3, 6, 12 and 22 months  
1010 ( $n=6$  mice/genotype). **G,** CK2 $\alpha'$  mRNA levels analyzed by RT-qPCR in striatum and  
1011 cortex of 6 month old mice. Data was normalized to GAPDH and WT striatum ( $n=3$   
1012 mice/genotype). **H,** Linear regression analysis between CK2 $\alpha'$  levels and HTT puncta,  
1013 and **I,** between CK2 $\alpha'$  levels and number of NeuN<sup>+</sup> cells in zQ175 mice. The Pearson  
1014 correlation coefficient ( $\rho$ ) and  $R^2$  are indicated. Data are mean  $\pm$  SD with significance  
1015 determined by one-way ANOVA Dunnett's post-hoc test in **B** and **F** and two-way  
1016 ANOVA Tukey post-hoc test in **D** and **G**. p-values  $<0.05$  are indicated. n.s = not  
1017 significant. Scale bar, 50  $\mu$ m.

1018

1019 **Figure 2. Expression of pro-inflammatory cytokines in the striatum of zQ175 is**  
1020 **decreased by reduction in CK2 $\alpha'$ . A,** RT-qPCR analysis for CK2 $\alpha'$  and IL-6 in  
1021 immortalized embryonic striatal cells *STHdh*<sup>Q7/Q7</sup> (control) and *STHdh*<sup>Q111/Q111</sup> (HD) ( $n =$   
1022 5 independent experiments). Data were normalized to GAPDH and using control cells  
1023 as a reference. **B,** siRNA knockdown of CK2 $\alpha'$  for 24 h in *STHdh*<sup>Q111/Q111</sup> cells and RT-  
1024 qPCR. Data were normalized with GAPDH and relativized to non-targeting control  
1025 siRNA-treated cells (scramble), ( $n = 6$  independent experiments). Data are mean  $\pm$  SEM  
1026 with significance determined by paired Student's t-test. **C, D,** Representative IF images  
1027 and quantitative analysis of CK2 $\alpha'$  in striatal MSNs immunostained for Ctip2, a specific  
1028 MSN marker, in WT, zQ175 and zQ175:CK2 $\alpha'$  (+/-) mice at 12 months of age ( $n=6$   
1029 mice/genotype). Scale bar, 50  $\mu$ m. **E, F,** Representative images of mouse cytokine  
1030 array panels in striatum extracts of WT, zQ175, and zQ175:CK2 $\alpha'$ (+/-) at 12-14 months of  
1031 age ( $n = 6$  mice/genotype). **G-I,** Iba1 IB in the striatum of 12 months old WT, zQ175 and  
1032 zQ175:CK2 $\alpha'$ . Quantification was measured by image analyses using Image J  
1033 software. Scale bar, 100  $\mu$ m. Error bars denote mean  $\pm$  SD, values were analyzed by  
1034 Student's t test in **F**, and one-way ANOVA and Tukey post-hoc test in **A, B, D,** and **H**. \* $p$   
1035 represent p-values comparing zQ175 and WT, # $p$  are p-values comparing zQ175 and  
1036 zQ175:CK2 $\alpha'$ (+/-).

1037

1038 **Figure 3. Decreased CK2 $\alpha'$  ameliorated astrocyte pathology in zQ175 mice. A,**  
1039 Representative images of striatum sections from 12-month-old mice immunostained for  
1040 CK2 $\alpha'$  and glutamine synthetase (GS, an astrocytic marker) in WT, zQ175 and  
1041 zQ175:CK2 $\alpha'$ (+/-). **B,** Quantification of GS<sup>+</sup> cells from images in **A** ( $n = 5$  mice/genotype).  
1042 **C,** Representative coronal images of brain scans in 9.4T magnet showing the striatum  
1043 voxel (green box) for MRS acquisition from each genotype at 22 months of age. **D,** *myo-*  
1044 *inositol* (Ins) quantification in WT, zQ175 and zQ175:CK2 $\alpha'$ (+/-) ( $n = 4-6$   
1045 mice/genotype). **E,** Representative IF analysis of C3d co-stained with GS in the  
1046 striatum of 12-month-old mice. **E'**, Higher magnification of the outlined section in **E**

1047 shows a representative view of a single astrocyte immunolabeled with C3d and GS. **F**,  
1048 Quantification of C3d signal from images in **E**. **G**, Quantification of C3d<sup>+</sup> GS<sup>+</sup> double-  
1049 positive cells ( $n = 5$  mice/genotype). DAPI is used for nuclear staining. Scale bars, 50  
1050  $\mu\text{m}$ . Error bars denote mean  $\pm$  SD.  $p$ -values for differences between groups are  
1051 indicated in each graph and calculated using two-way ANOVA and Tukey post-hoc  
1052 tests. n.s. = not significant.

1053

1054 **Figure 4. CK2 $\alpha'$  haploinsufficiency increased the frequency of AMPA-mediated**  
1055 **miniature excitatory postsynaptic currents (mEPSC) in the dorsolateral striatum**  
1056 **of zQ175 mice. A**, Image shows whole-cell patch-clamp recording diagram in acute  
1057 dorsolateral striatum slices, where Ctip2 labeled MSNs from 12-month-old mice. Scale  
1058 bar 500  $\mu\text{m}$ , Ctr: Cortex; Str: Striatum. **B**, Input–output curve (WT,  $n = 8$ ; zQ175,  $n = 9$ ;  
1059 zQ175:CK2 $\alpha'$ <sup>(+/-)</sup>  $n = 13$ ). Representative traces are shown in the top inset. **C**, Short-  
1060 term potentiation measured via paired-pulse facilitation (WT,  $n = 8$ ; zQ175,  $n = 9$ ;  
1061 zQ175:CK2 $\alpha'$ <sup>(+/-)</sup>  $n = 11$ ). Representative traces of two consecutive stimuli delivered at  
1062 25 ms time intervals are shown in the top inset. **D**, Short-term depression analyzed  
1063 through synaptic fatigue (WT,  $n = 7$ ; zQ175,  $n = 9$ ; zQ175:CK2 $\alpha'$ <sup>(+/-)</sup>  $n = 12$ ).  
1064 Representative traces are shown in the top inset. Values were analyzed using two-way  
1065 ANOVA with Tukey's post-hoc analysis. **E-F**, Spontaneous recordings of mini excitatory  
1066 postsynaptic currents (mEPSCs). Amplitude (in pA; left panel) and frequency (in Hz;  
1067 right panel) were analyzed (WT,  $n = 10$ ; zQ175,  $n = 9$ ; zQ175:CK2 $\alpha'$ <sup>(+/-)</sup>  $n = 12$ ). **G**,  
1068 Representative mEPSC traces. Values were analyzed using one-way ANOVA with  
1069 Dunn's post-hoc analysis.  $P$  values  $<0.05$  are indicated. Error bars represent mean  $\pm$   
1070 SEM from at least 3 mice/genotype.

1071

1072 **Figure 5. Genetic deletion of CK2 $\alpha'$  improved motor deficits in zQ175. A**, Number  
1073 of foot slips recorded while walking on four different types of beams with different  
1074 degrees of difficulty from less to more challenging; medium-square, medium round,  
1075 small-square and small-round (Beam test), and **B**, Latency to fall off the rod Rotarod  
1076 test) at 3, 6 and 12 months of age ( $n = 16-18$  mice/genotype in 3 months,  $n = 12-14$  for 6  
1077 months and  $n = 5-6$  for 12 months). Error bars denote mean  $\pm$  SEM, values were  
1078 analyzed by two-way ANOVA with *Sidak's* post-hoc test.  $p$ -values  $<0.05$  are indicated,  
1079 n.s = not significant.

1080

1081 **Figure 6. Depletion of CK2 $\alpha'$  restored the expression of synaptic genes**  
1082 **associated with  $\alpha$ -syn-dependent regulation in the striatum of symptomatic zQ175**  
1083 **mice. A**, Kruskal-Wallis test of module expressions between zQ175 (HD) mice and  
1084 zQ175:CK2 $\alpha'$ <sup>(+/-)</sup> mice. The y-axis is the negative log transformed  $p$ -values. **B**,  
1085 Expressions of module "Greenyellow" in each mouse sample. **C**, IPA canonical pathway  
1086 analysis of module genes for module "Greenyellow". **D**, Enrichment analysis of GO  
1087 terms in CC (cellular component) for module genes of module "Greenyellow". **E**,  
1088 Network visualization of top 15% connected genes in "Greenyellow" Module. The size of  
1089 the circles was scaled by the absolute value of the mean log<sub>2</sub>-fold change between

1090 zQ175 and zQ175:CK2 $\alpha'$ <sup>(+/-)</sup> mice. **F**, Marker genes and their mean log2 fold change  
1091 between zQ175 and zQ175:CK2 $\alpha'$ <sup>(+/-)</sup> mice compared to WT. **G**, IPA network analysis of  
1092 DGEs in zQ175:CK2 $\alpha'$  mice showing  $\alpha$ -syn as the most significant upstream regulator.

1093

1094 **Figure 7.  $\alpha$ -syn differentially accumulates in the nucleus of symptomatic zQ175**  
1095 **mice and colocalized with mtHTT. A**,  $\alpha$ -syn (4D6 antibody) IB in the striatum of WT,  
1096 zQ175 and SNCA<sup>KO</sup> and **B** in WT, zQ175 and zQ175:CK2 $\alpha'$ <sup>(+/-)</sup> mice at 12 months old.  
1097 GAPDH used as loading control. **C**,  $\alpha$ -syn protein levels analyzed by Image J from IB  
1098 analyses (n= 5-6 mice/genotype). **D**, Nuclear/cytoplasmic fractionation of striatum  
1099 samples from 12-month-old WT, zQ175 and SNCA<sup>KO</sup> mice. **E**, Quantification of nuclear  
1100  $\alpha$ -syn from images in D (n=4 mice/genotype). **F**, Representative IF images of dorsal  
1101 striatum sections from 12 month old WT, zQ175 and zQ175:CK2 $\alpha'$ <sup>(+/-)</sup> (n=3  
1102 mice/genotype) for  $\alpha$ -syn and HTT (EM48 antibody). White arrows indicate  $\alpha$ -syn/HTT  
1103 colocalization. Scale bar, 10  $\mu$ m. **G**, Magnification of images from F showing nuclear  
1104 and cytoplasmic  $\alpha$ -syn and HTT colocalization. Grey circles represent nuclei. White  
1105 arrows indicate  $\alpha$ -syn/HTT colocalization. Scale bar, 2  $\mu$ m. **H** Number of cytoplasmic  
1106 and **I** nuclear EM48<sup>+</sup> puncta calculated using Image J Puncta analysis plugin. A total of  
1107 three images per brain section and three brain sections per genotype were analyzed  
1108 (n=27 images, n=3 mice/ genotype). **J**, Number of colocalized  $\alpha$ -syn and EM48<sup>+</sup> puncta  
1109 calculated using Image J Puncta analysis plugin (n=3 mice/genotype). Error bars denote  
1110 mean  $\pm$  SEM, values were analyzed by Student's t-test.

1111

1112 **Figure 8. CK2 $\alpha'$  regulates phosphorylation of S129- $\alpha$ -syn and nuclear**  
1113 **accumulation in symptomatic zQ175 mice. A**, pS129- $\alpha$ -syn (EP1536Y antibody) IB in  
1114 the striatum of 12-month-old WT, zQ175 and SNCA<sup>KO</sup> (n=4 mice/genotype). **B** pS129- $\alpha$ -  
1115 syn (81A antibody) IB in the striatum of patients with HD (Vonsattel grade 3 and 4)  
1116 compared to age and sex matched controls. GAPDH is used as loading control. **C**  
1117 pS129- $\alpha$ -syn protein levels analyzed by Image J from images in **B**. Samples from grade  
1118 3 and grade 4 HD were all grouped for pS129- $\alpha$ -syn quantification. **D**, Representative  
1119 pS129- $\alpha$ -syn IF images (81A antibody) in the dorsal striatum of 12-month-old WT,  
1120 zQ175 and zQ175:CK2 $\alpha'$ <sup>(+/-)</sup> (n=3 mice/genotype), Scale bar, 20  $\mu$ m. **E**, pS129- $\alpha$ -syn  
1121 fluorescence signal was calculated using Image J from images in D (n=3  
1122 mice/genotype, n=27 images per mouse). **F**, Magnification of images in D showed  
1123 pS129- $\alpha$ -syn and EM48 colocalization in zQ175 and zQ175:CK2 $\alpha'$ <sup>(+/-)</sup> (n=3 mice/group).  
1124 **G**, Quantification of pS129- $\alpha$ -syn and EM48 colocalized puncta using Image J puncta  
1125 plug in. All data are mean  $\pm$  SEM. Statistical analyses were conducted by one-way  
1126 ANOVA. **H**, Working model for the role of CK2 $\alpha'$  in the regulation of pS129- $\alpha$ -syn and  
1127 HD-like phenotype.

1128

1129

1130

1131

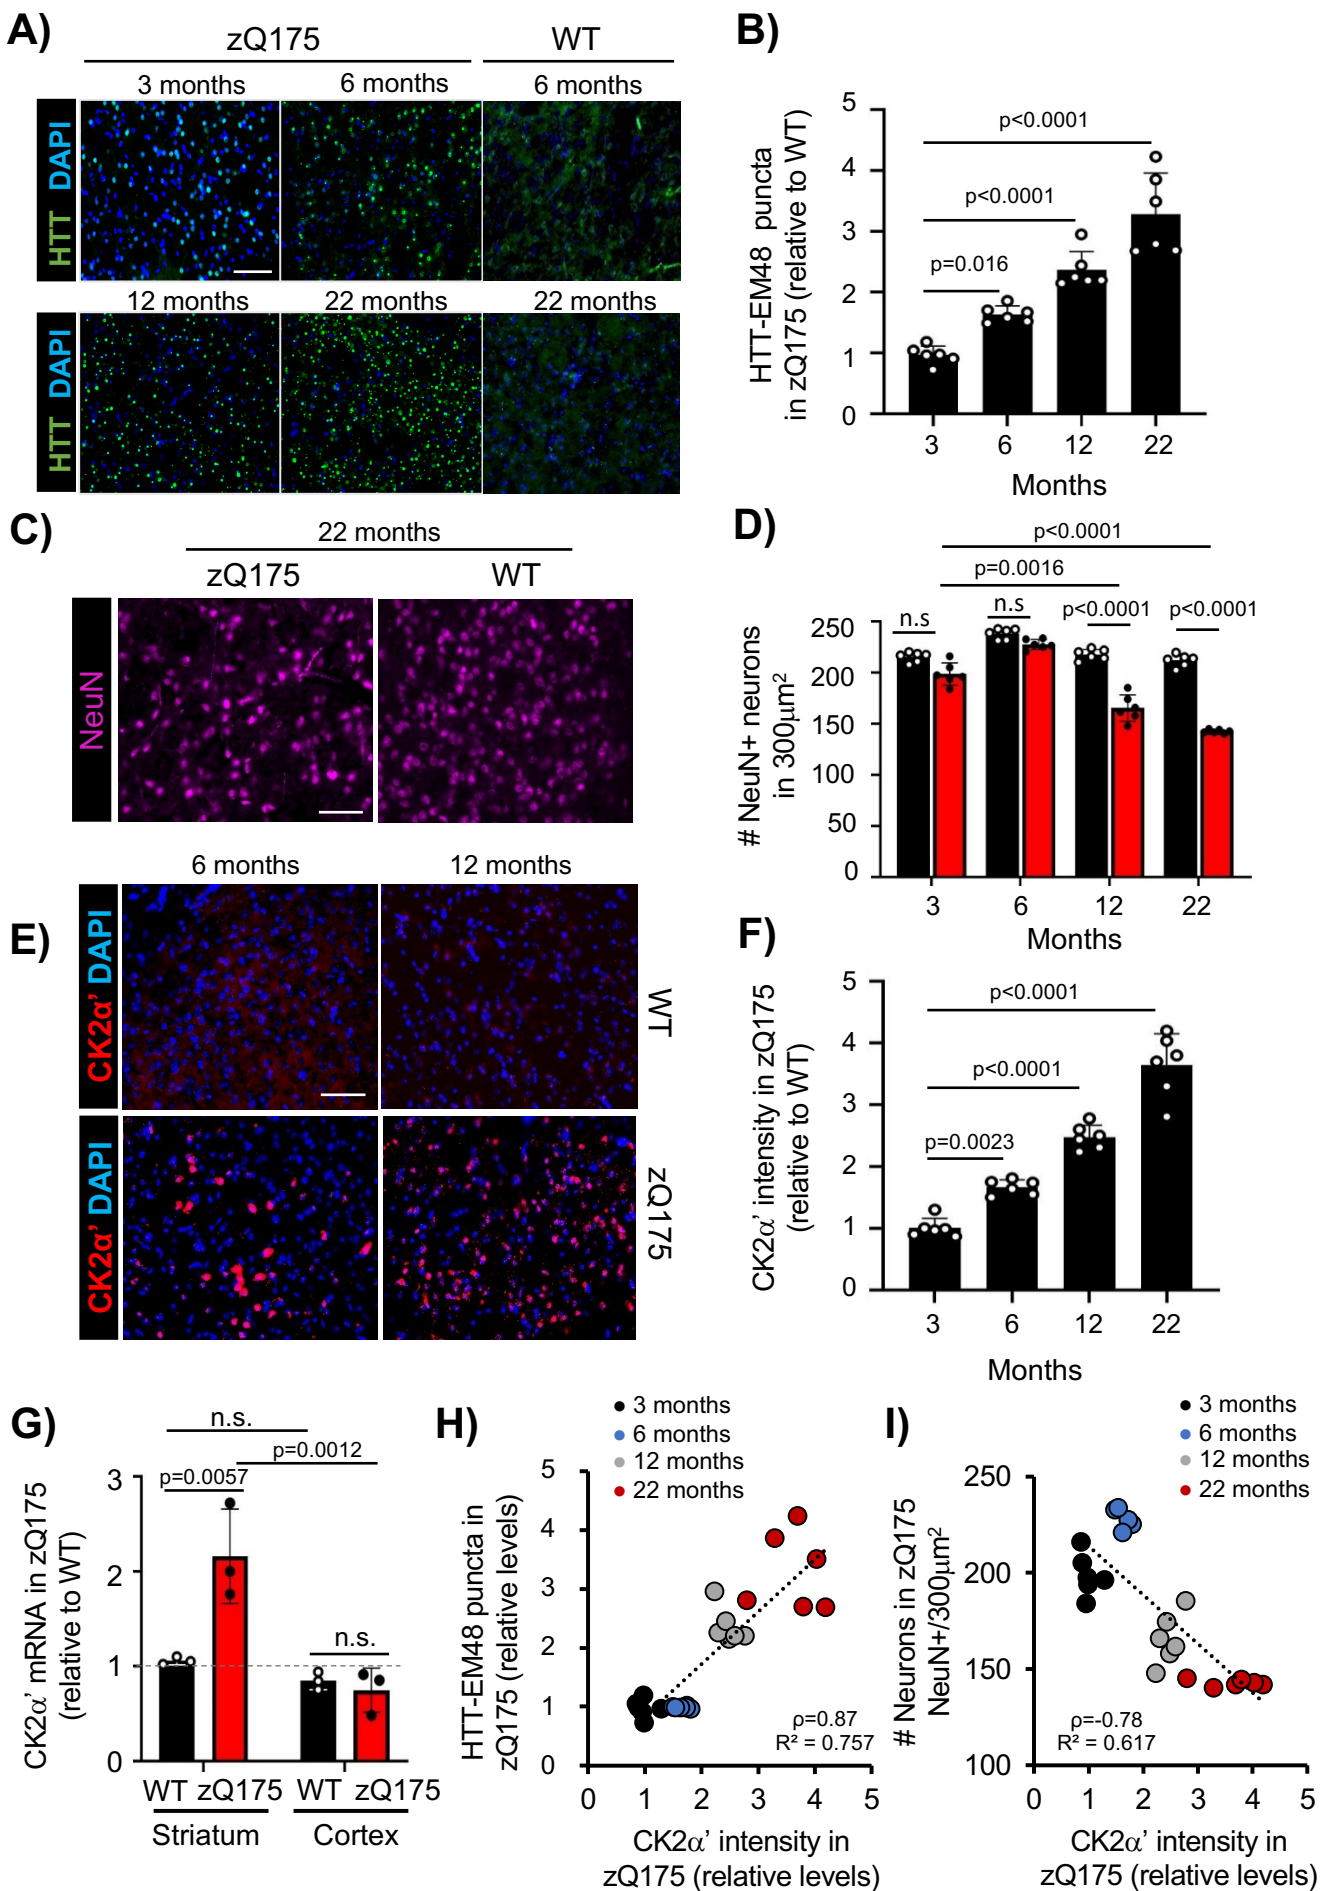

**Figure 1**

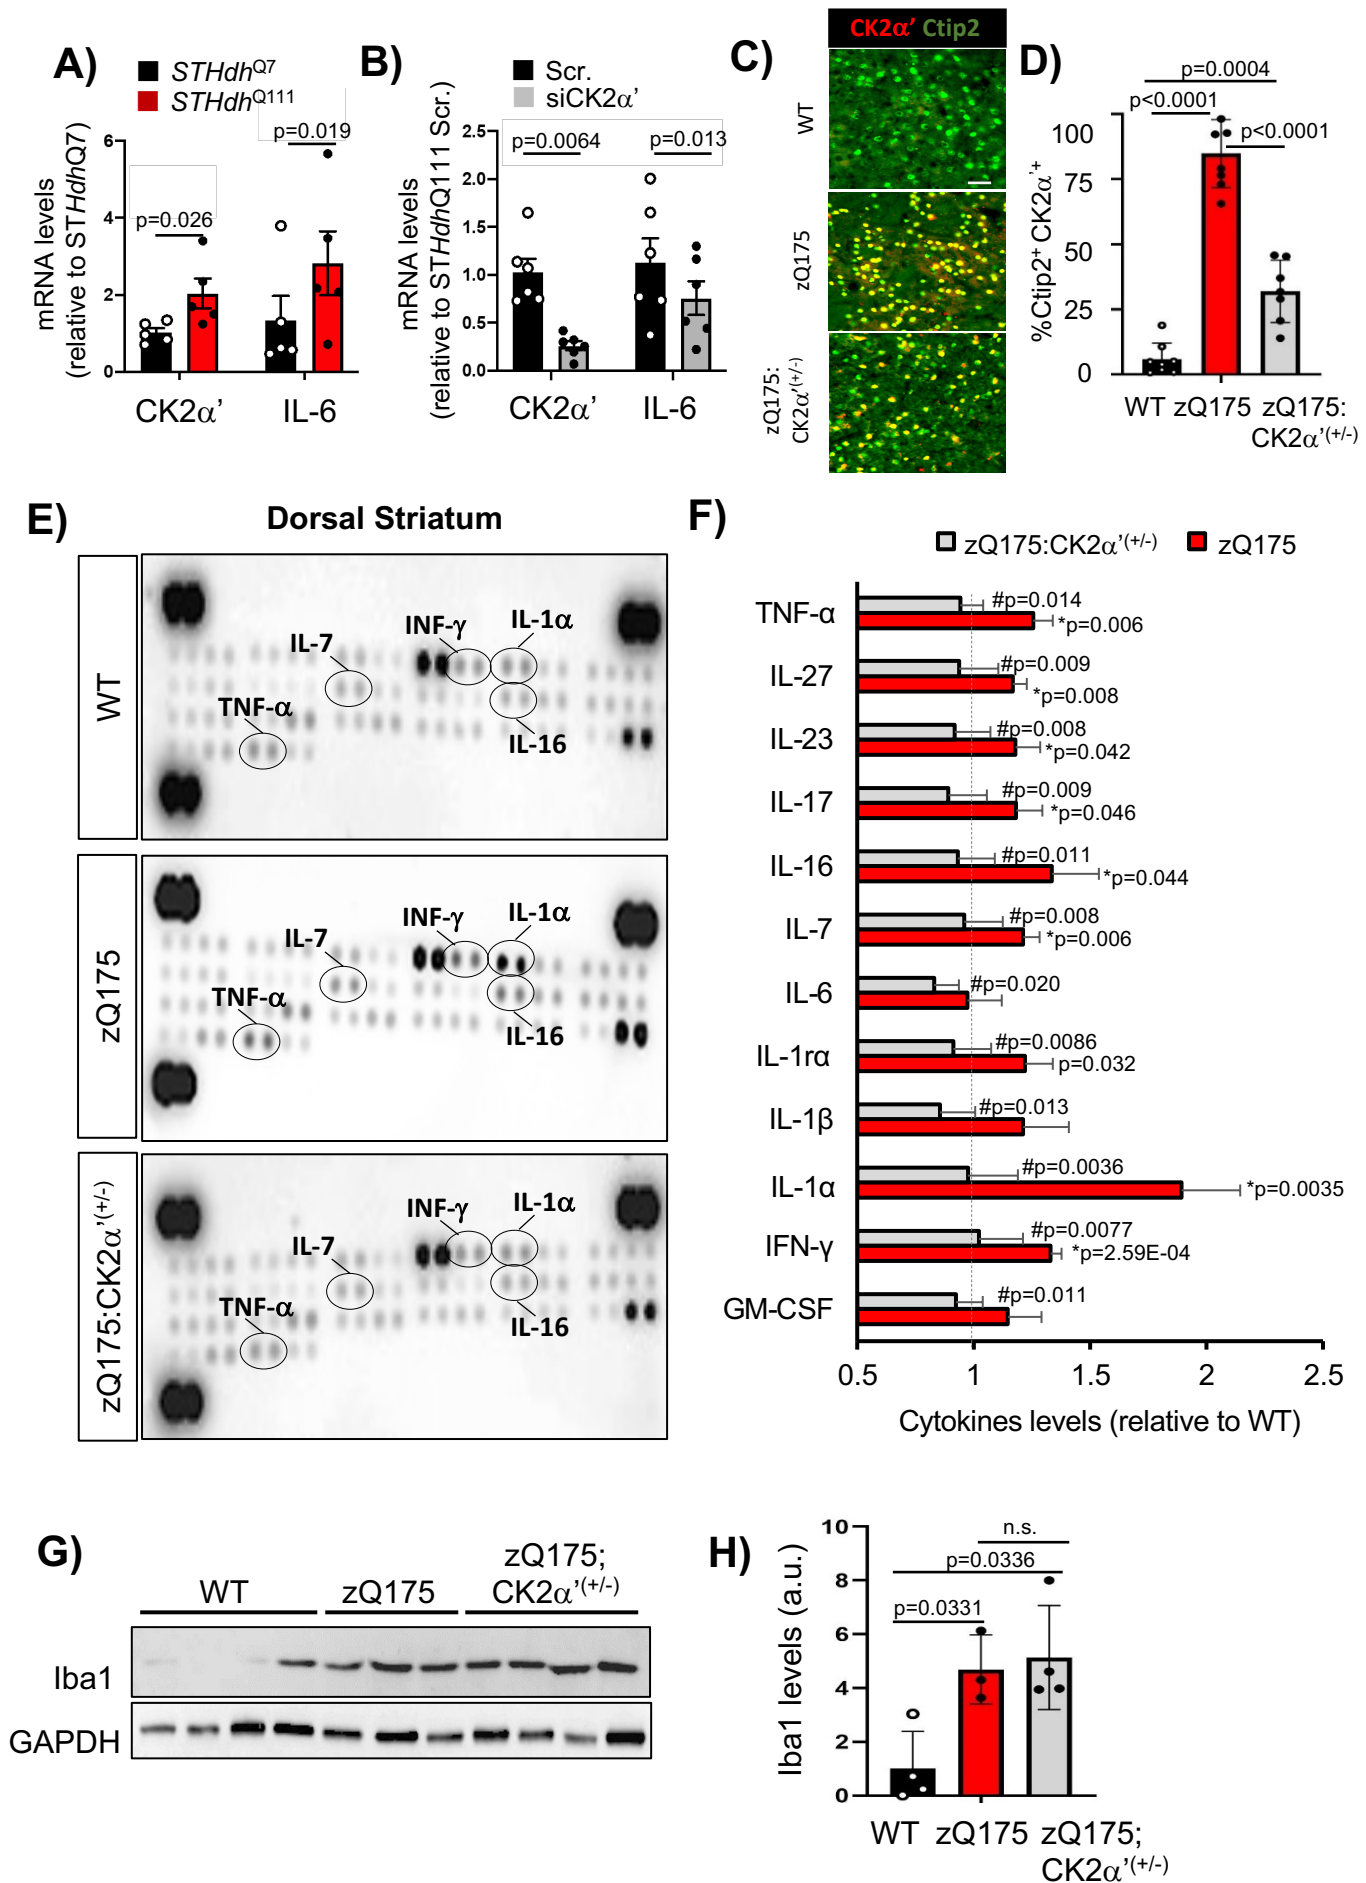

**Figure 2**

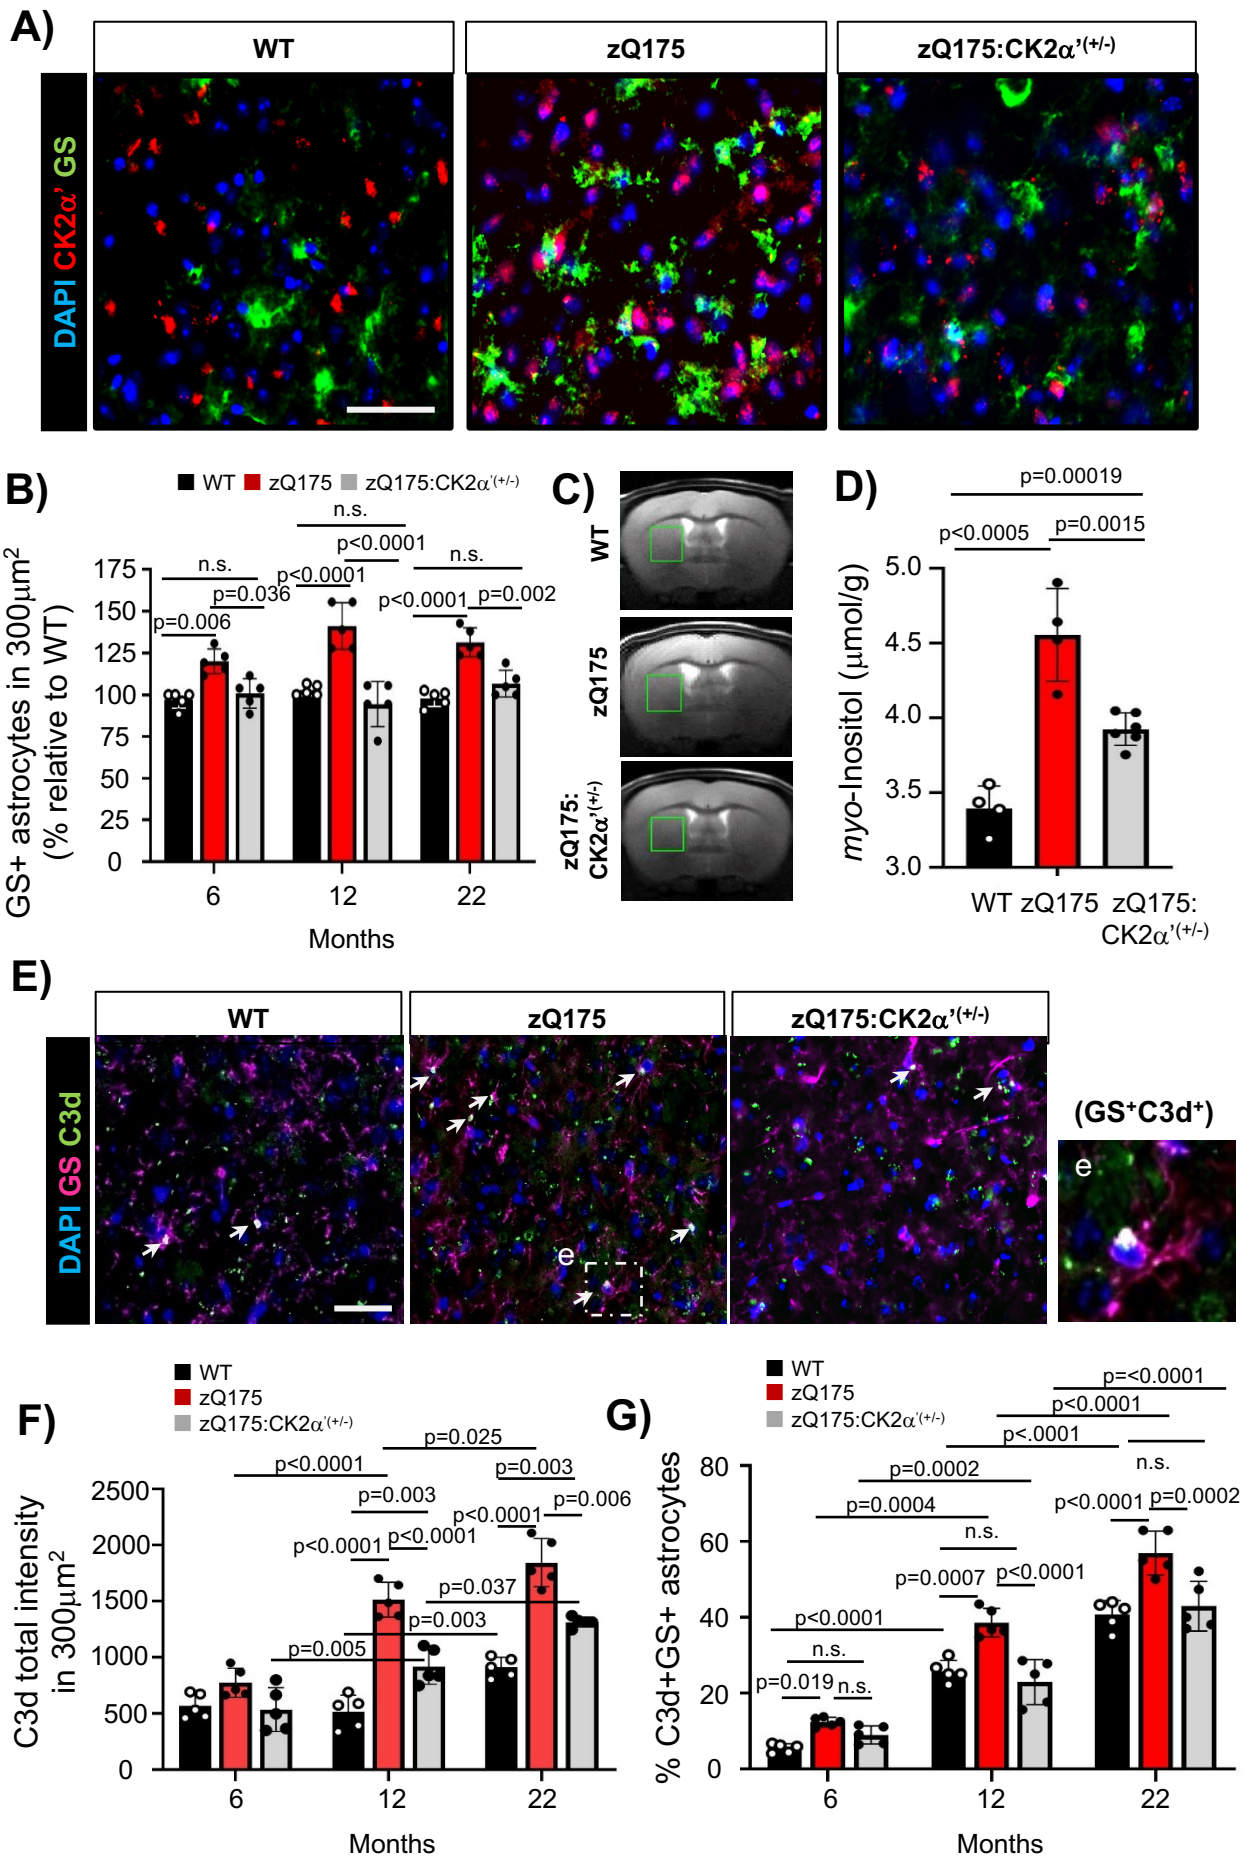

**Figure 3**

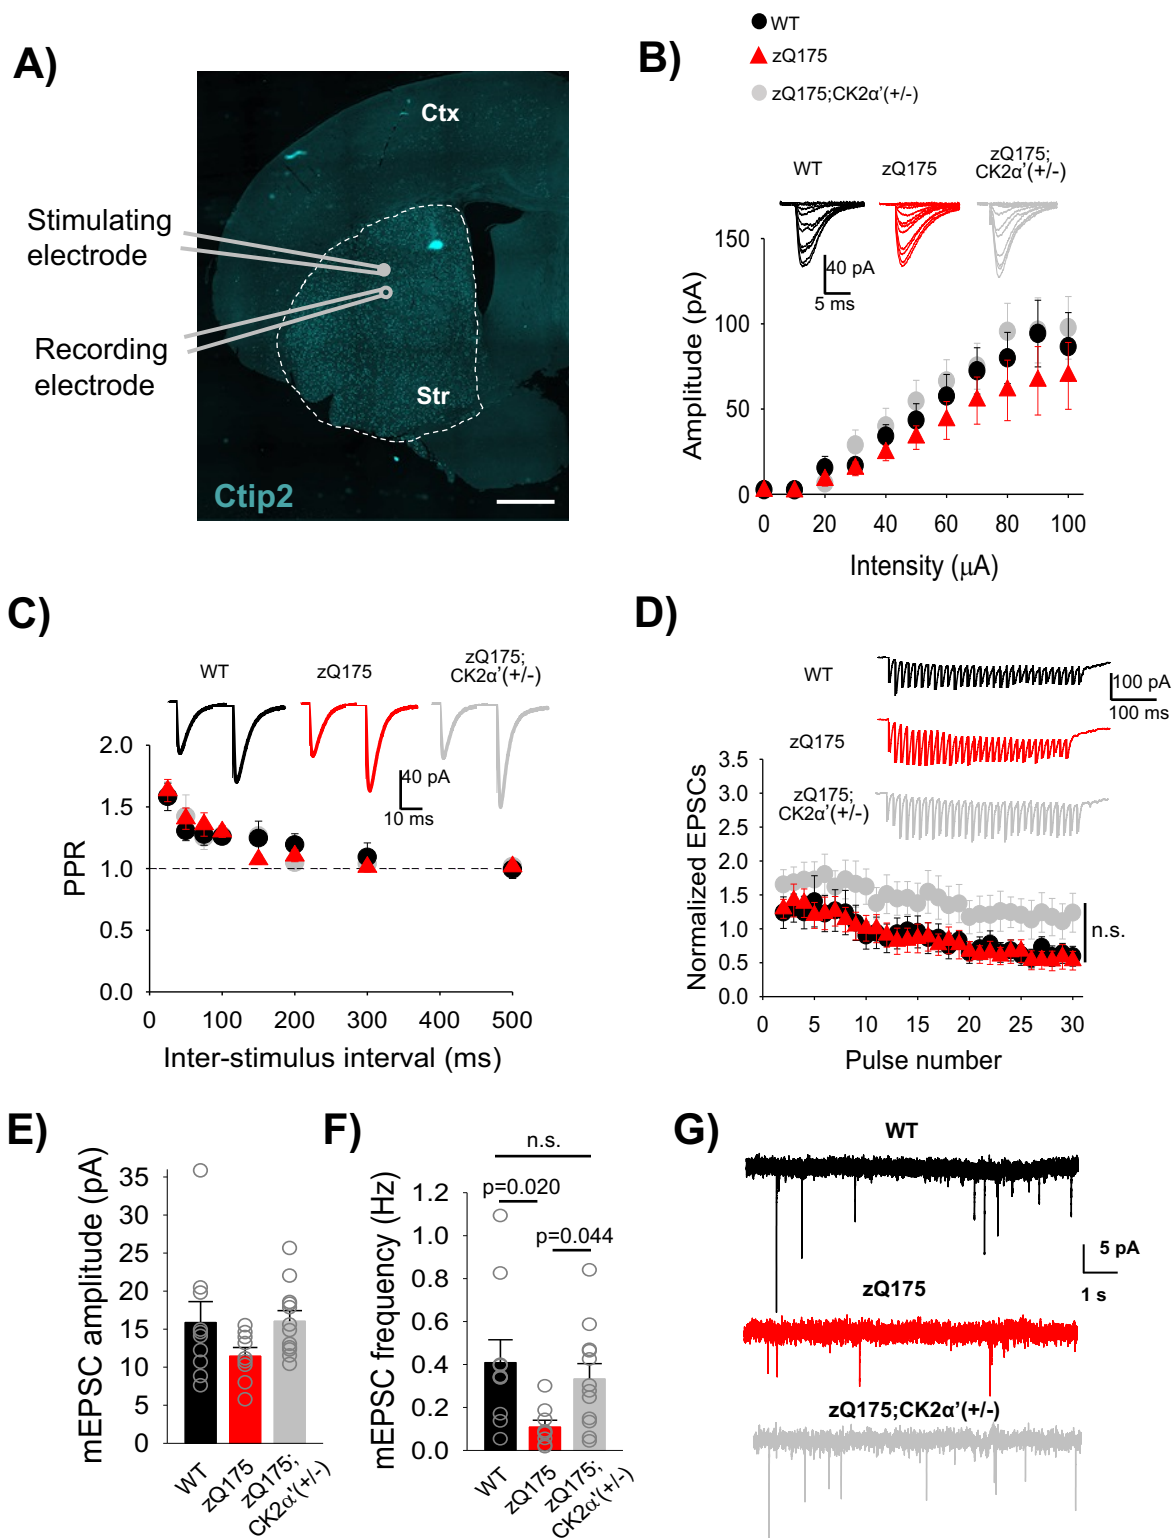

**Figure 4**

**A)**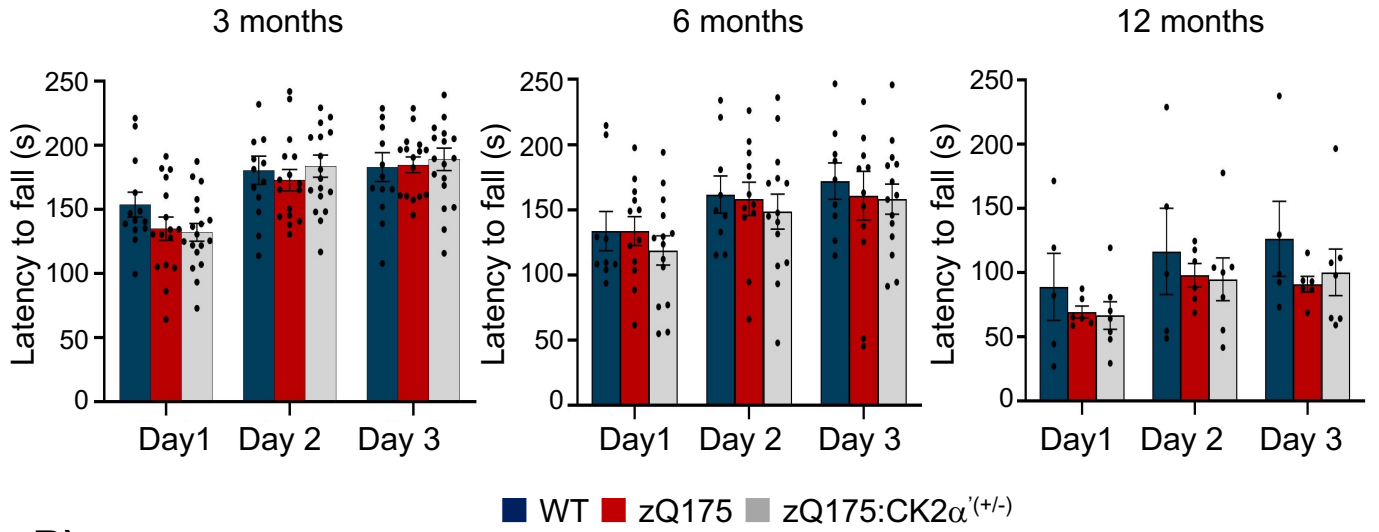**B)**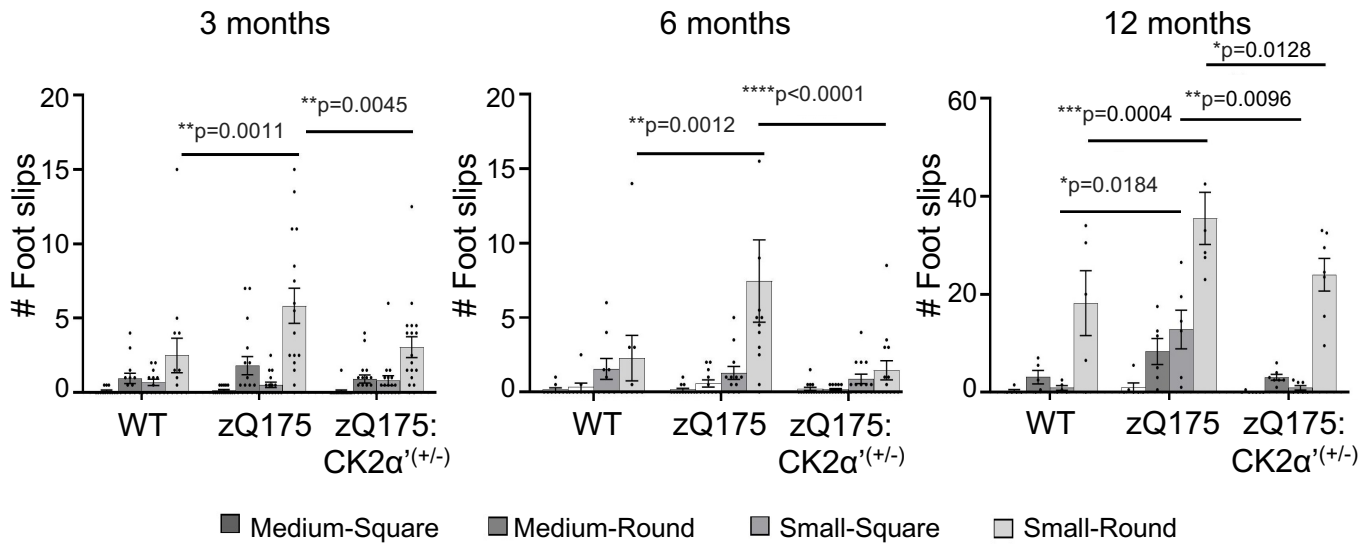**Figure 5**



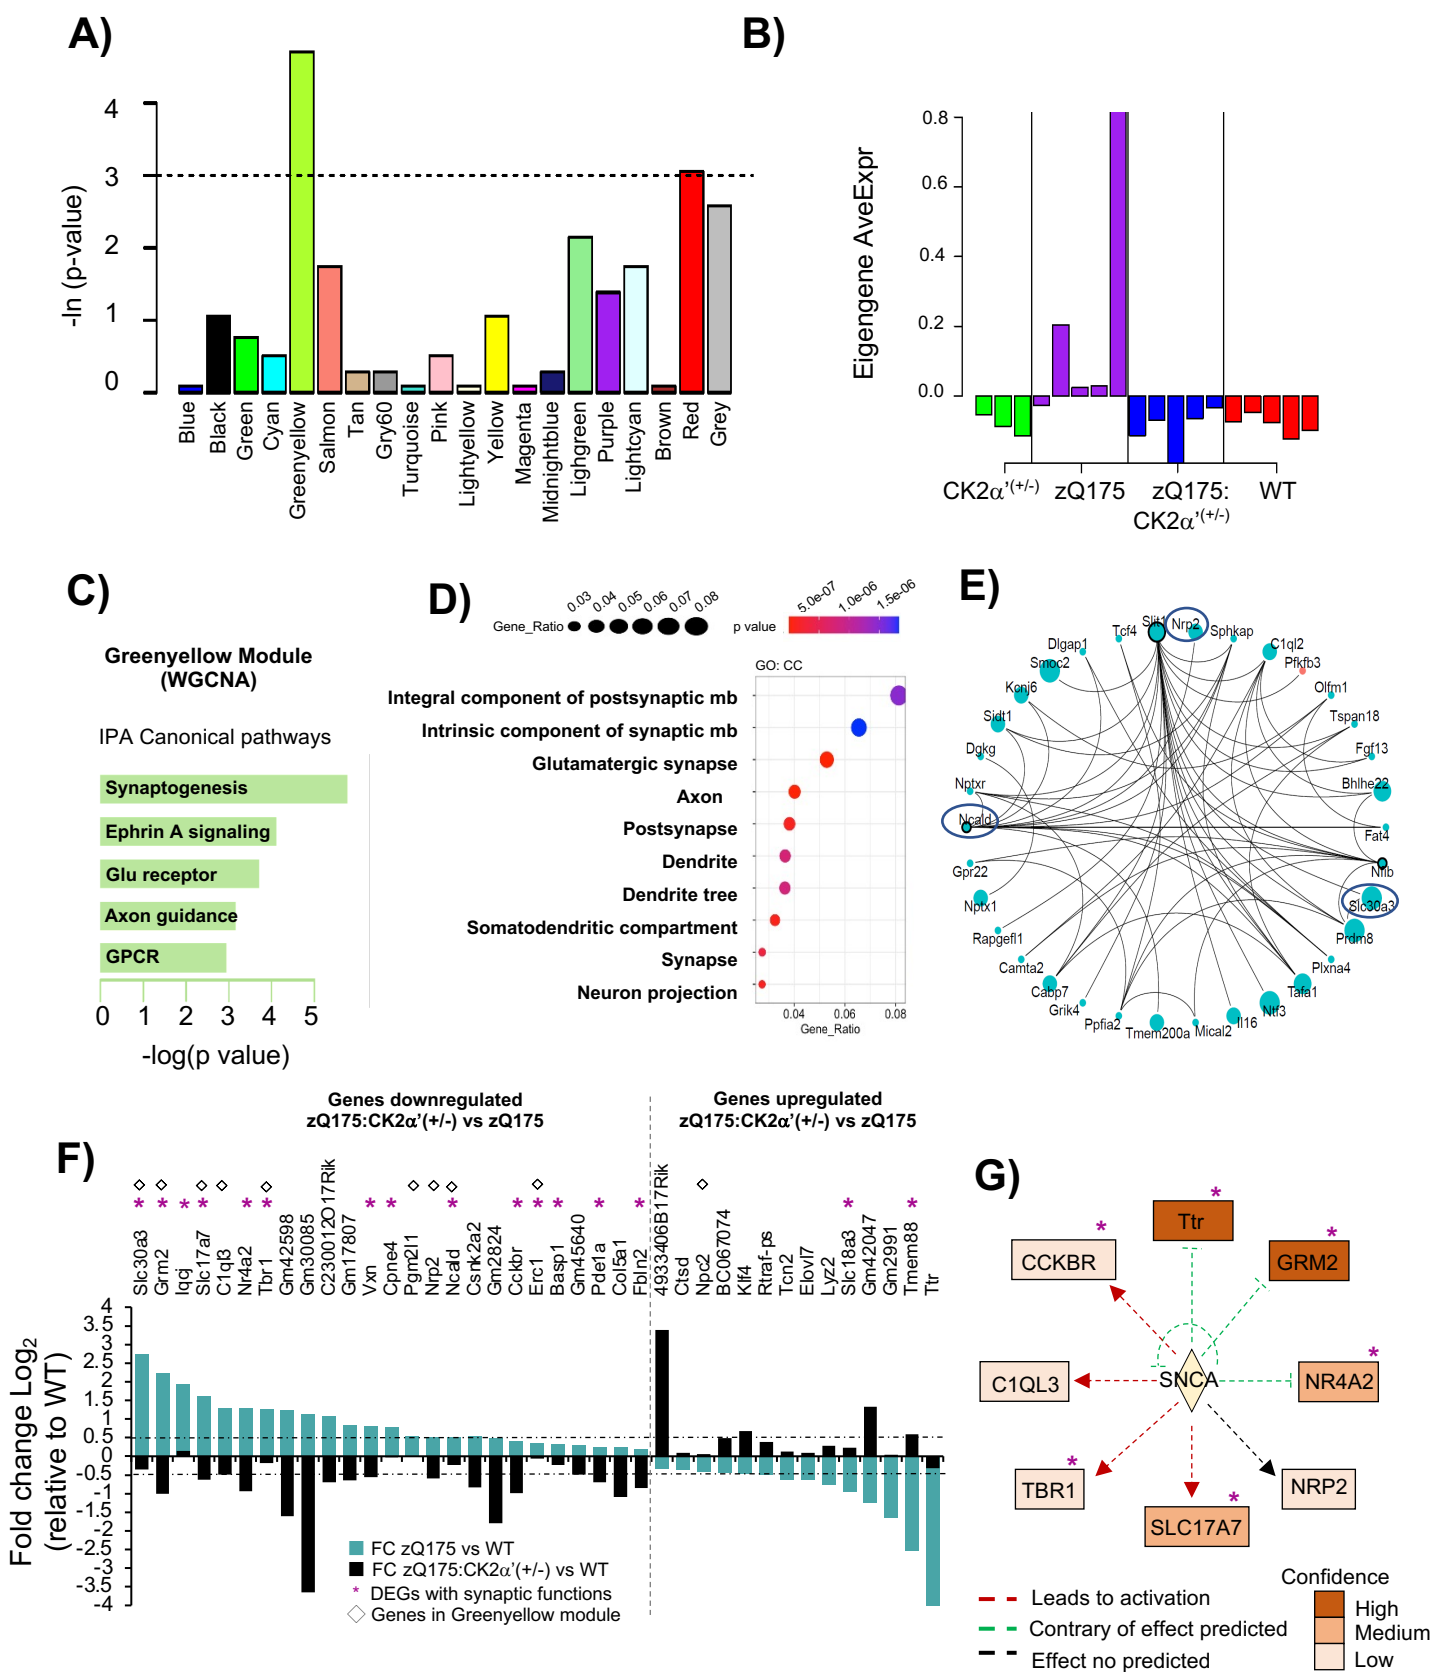

**Figure 6**

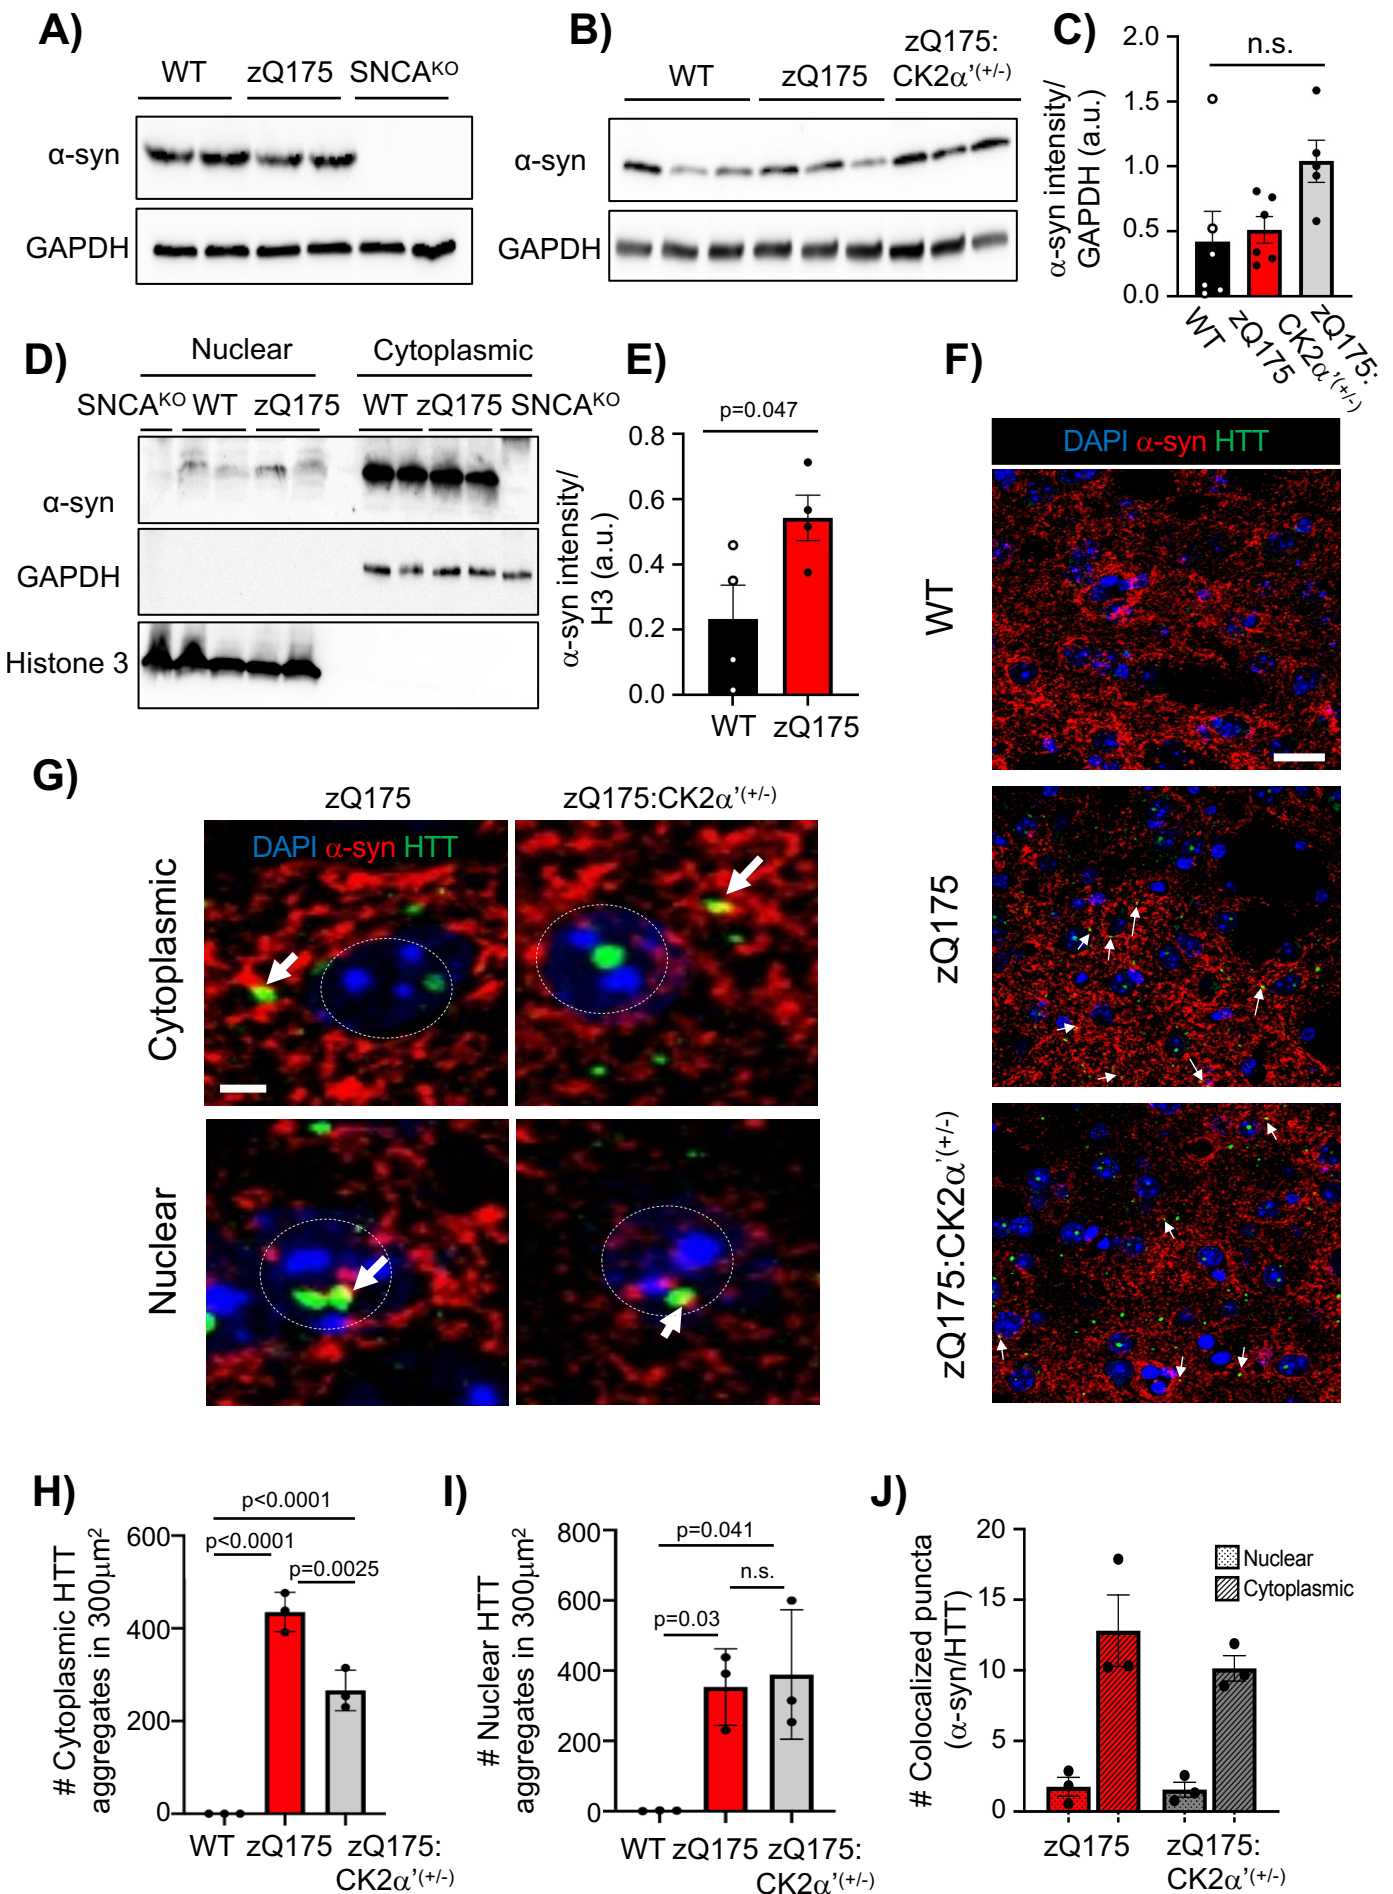

**Figure 7**

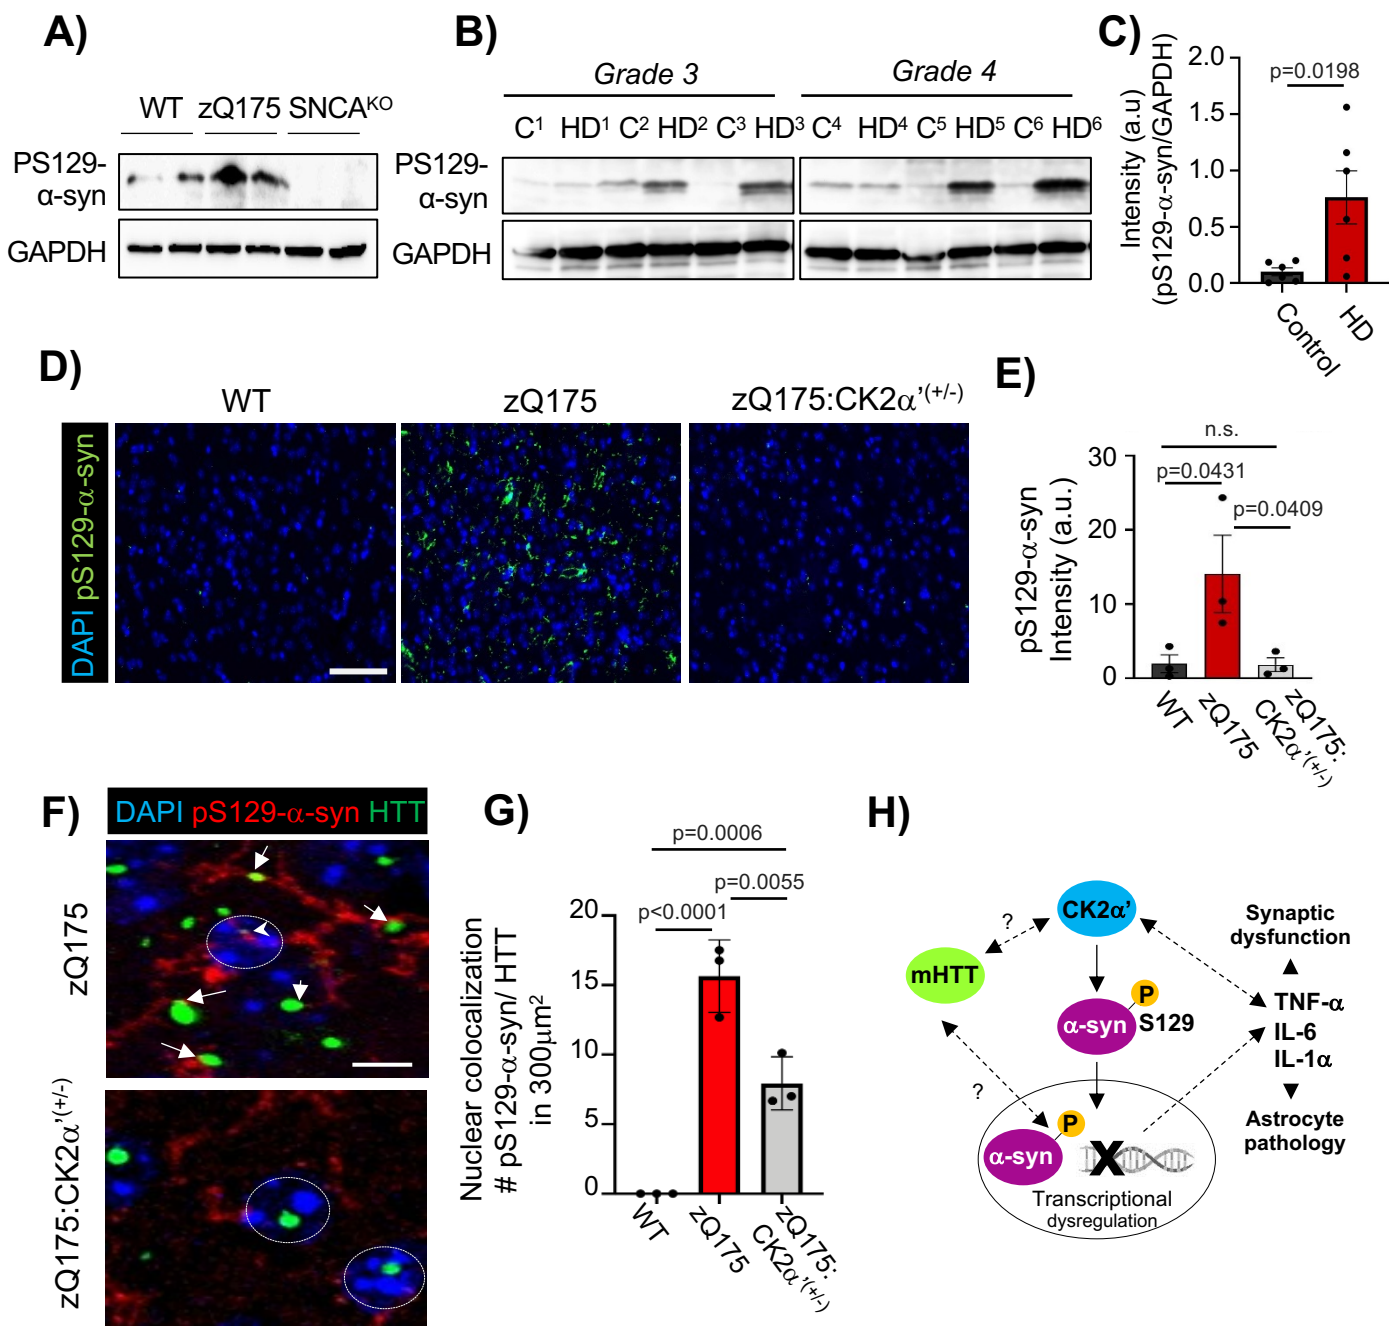

**Figure 8**
