# Supplementary material for: CK2 alpha prime and alpha-synuclein pathogenic functional interaction mediates synaptic dysregulation in Huntington’s disease
Source: bioRxiv or medRxiv preprint supplement (doi:10.1101/2020.10.29.359380), 2022-01-27
Supplement: Supplementary file [file media-1.pdf]

# **Protein kinase CK2 alpha prime and alpha-synuclein constitute a key regulatory pathway in Huntington's disease**

Nicole Zarate\*, Dahyun Yu\*, Francesco Cuccu\*, Jonny Yue, Taylor Brown, Adelyn Tsai, Carmen Perez, Kevin Jiang, Tessa Nichols-Meade, Maha Syed, Hyuck Kim, Sarah Larson, Ying Zhang, Michael Benneyworth, Gulin Oz, Marija Cvetanovic, Alfonso Araque and Rocio Gomez-Pastor.

## **Supplementary Material**

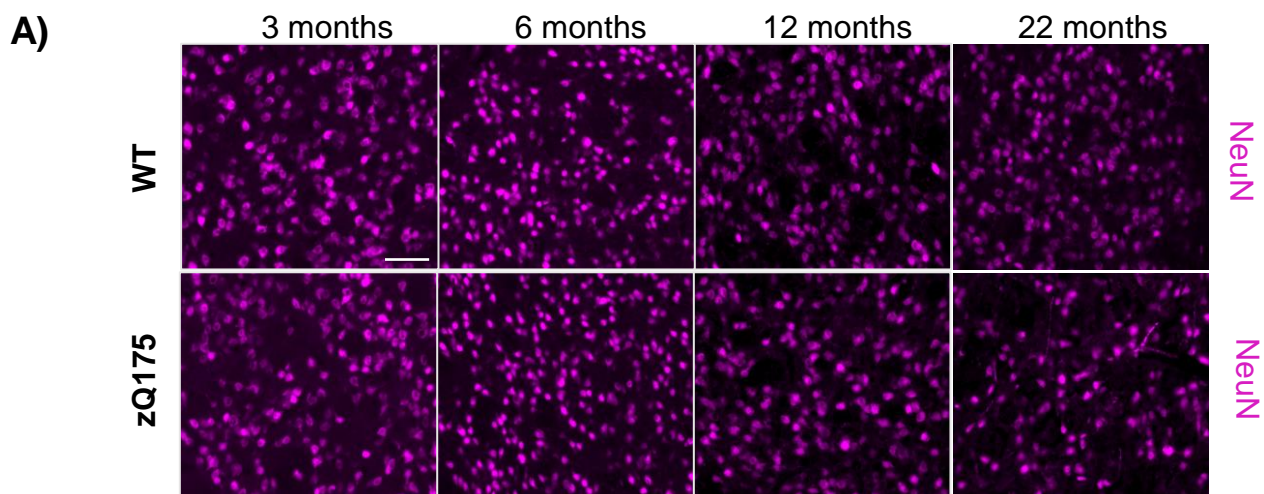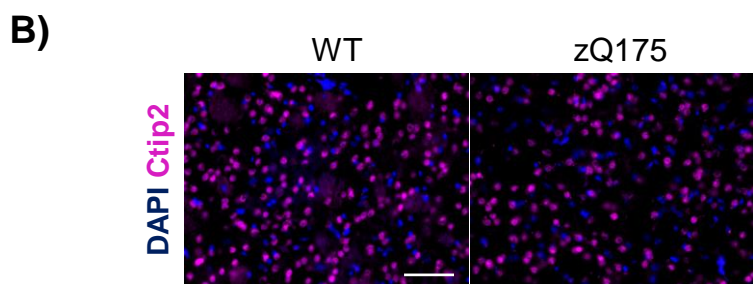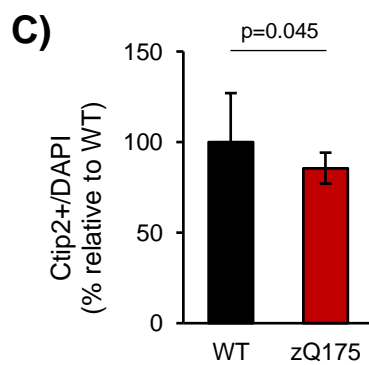

**Figure S1**

**A) Cytokine array panel A coordinates**

|   |           |        |               |        |       |         |         |               |               |              |       |        |    |    |    |    |    |    |    |    |    |    |           |    |
|---|-----------|--------|---------------|--------|-------|---------|---------|---------------|---------------|--------------|-------|--------|----|----|----|----|----|----|----|----|----|----|-----------|----|
|   | 1         | 2      | 3             | 4      | 5     | 6       | 7       | 8             | 9             | 10           | 11    | 12     | 13 | 14 | 15 | 16 | 17 | 18 | 19 | 20 | 21 | 22 | 23        | 24 |
| A | Reference |        |               |        |       |         |         |               |               |              |       |        |    |    |    |    |    |    |    |    |    |    | Reference |    |
| B | CXCL13    | C5     | G-CSF         | GM-CSF | I-309 | Eotaxin | siCAM-1 | IFN- $\gamma$ | IL-1 $\alpha$ | IL-1 $\beta$ | IL-ra | IL-2   |    |    |    |    |    |    |    |    |    |    |           |    |
| C | IL-3      | IL-4   | IL-5          | IL-6   | IL-7  | IL-10   | IL-13   | IL12p70       | IL-16         | IL-17        | IL-23 | IL-27  |    |    |    |    |    |    |    |    |    |    |           |    |
| D | CXCL10    | CXCL11 | CXCL1         | M-CSF  | MCP-1 | CCL12   | CXCL9   | CCL3          | CCL4          | CXCL2        | CCL5  | CXCL12 |    |    |    |    |    |    |    |    |    |    |           |    |
| E | CCL17     | TIMP-1 | TNF- $\alpha$ | TREM-1 |       |         |         |               |               |              |       |        |    |    |    |    |    |    |    |    |    |    |           |    |
| F | Reference |        |               |        |       |         |         |               |               |              |       |        |    |    |    |    |    |    |    |    |    |    | PBS       |    |

**C)**

| Cytokines     | Chemokines               |
|---------------|--------------------------|
| G-CSF         | CXCL13                   |
| GM-CSF        | Eotaxin                  |
| I-309         | CXCL10                   |
| siCAM-1       | CXCL11                   |
| IFN- $\gamma$ | CXCL1                    |
| IL-1 $\alpha$ | MCP-1                    |
| IL-1 $\beta$  | CCL12                    |
| IL-ra         | CXCL9                    |
| IL-2          | CC3                      |
| IL-3          | CCL4                     |
| IL-4          | CXCL2                    |
| IL-5          | CCL5                     |
| IL-6          | CXCL12                   |
| IL-7          | CCL17                    |
| IL-10         |                          |
| IL-13         | Complement               |
| IL12p70       | C5a                      |
| IL-16         | Matrix metalloproteinase |
| IL-17         | TIMP-1                   |
| IL-23         | Immune receptor          |
| IL-27         | TREM-1                   |

**B)**

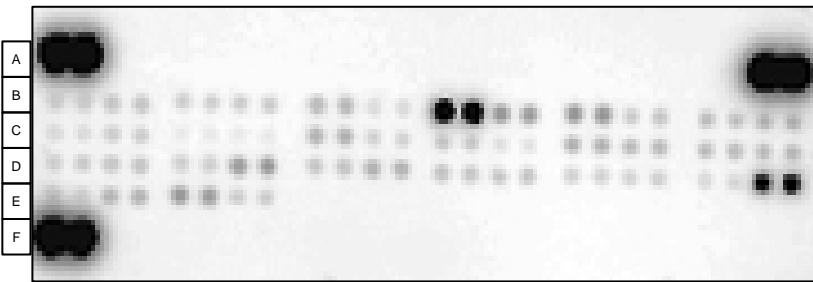

**D)**

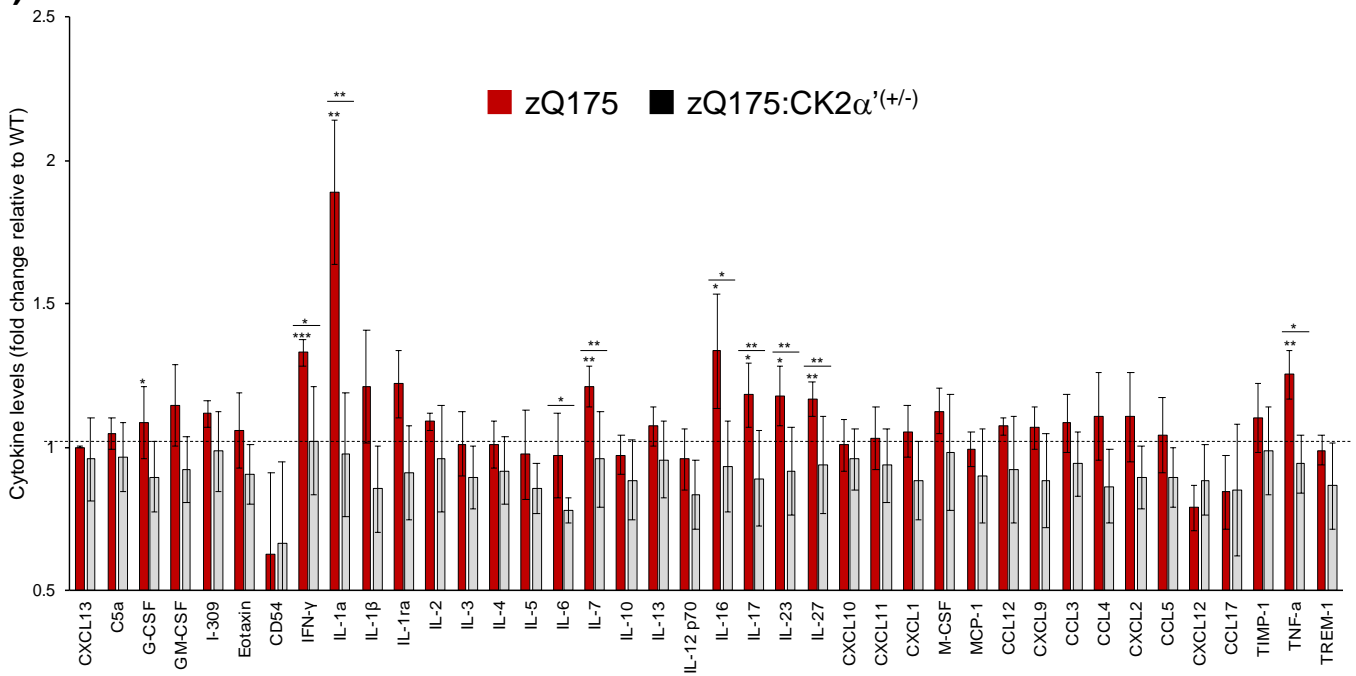

**Figure S2**

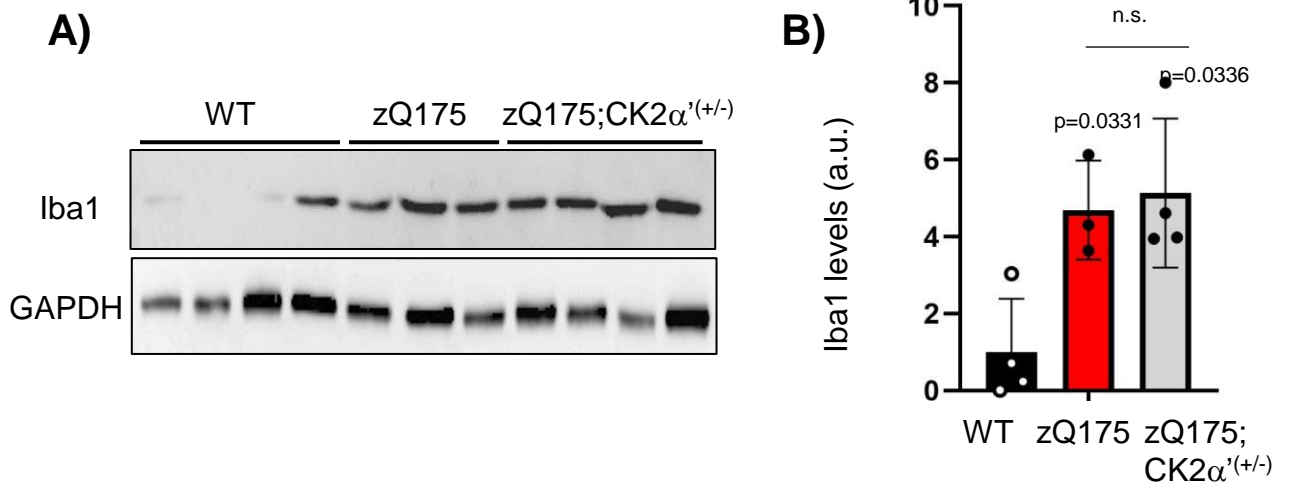

**Figure S3**

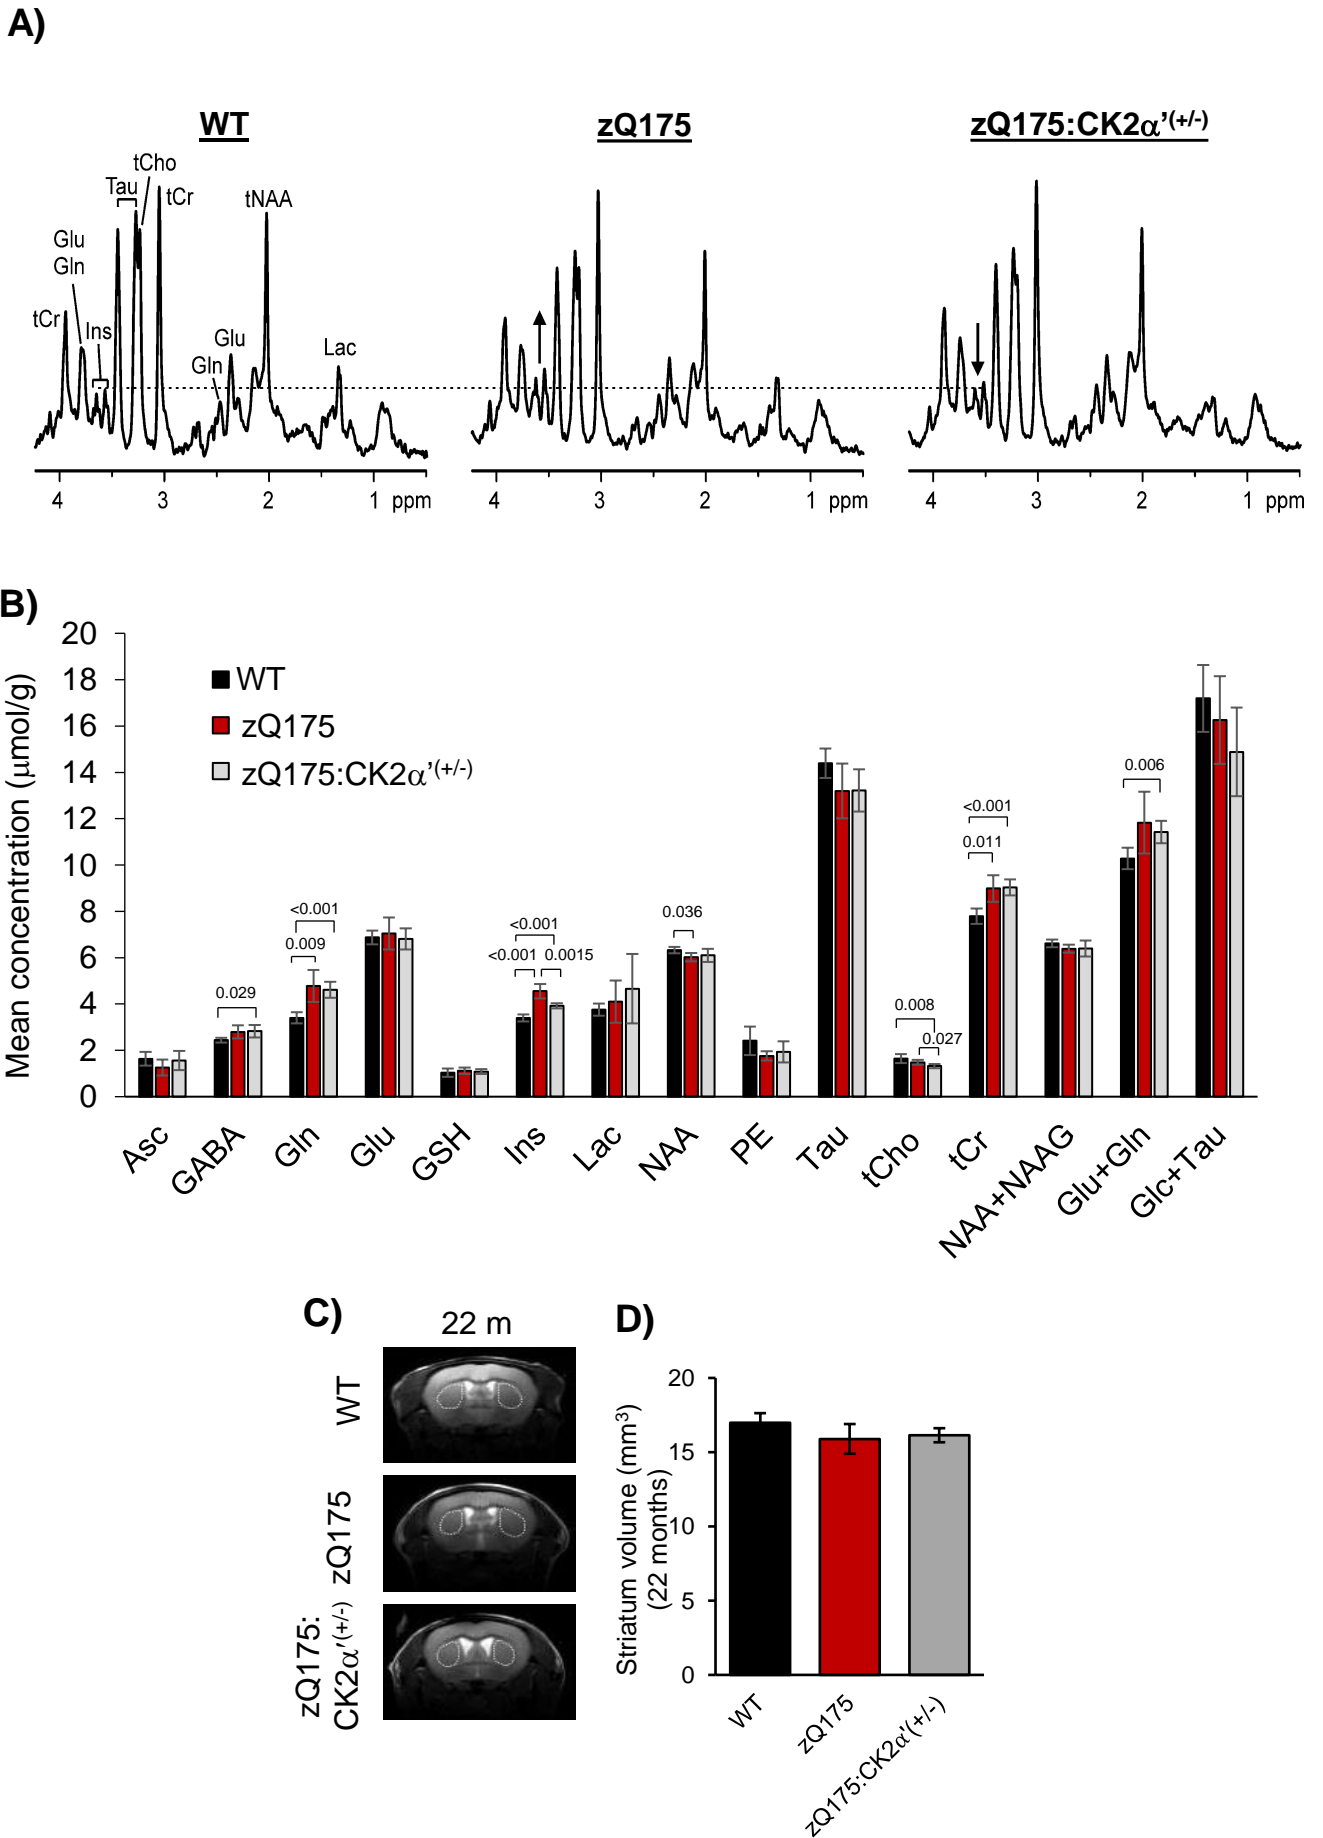

**Figure S4**

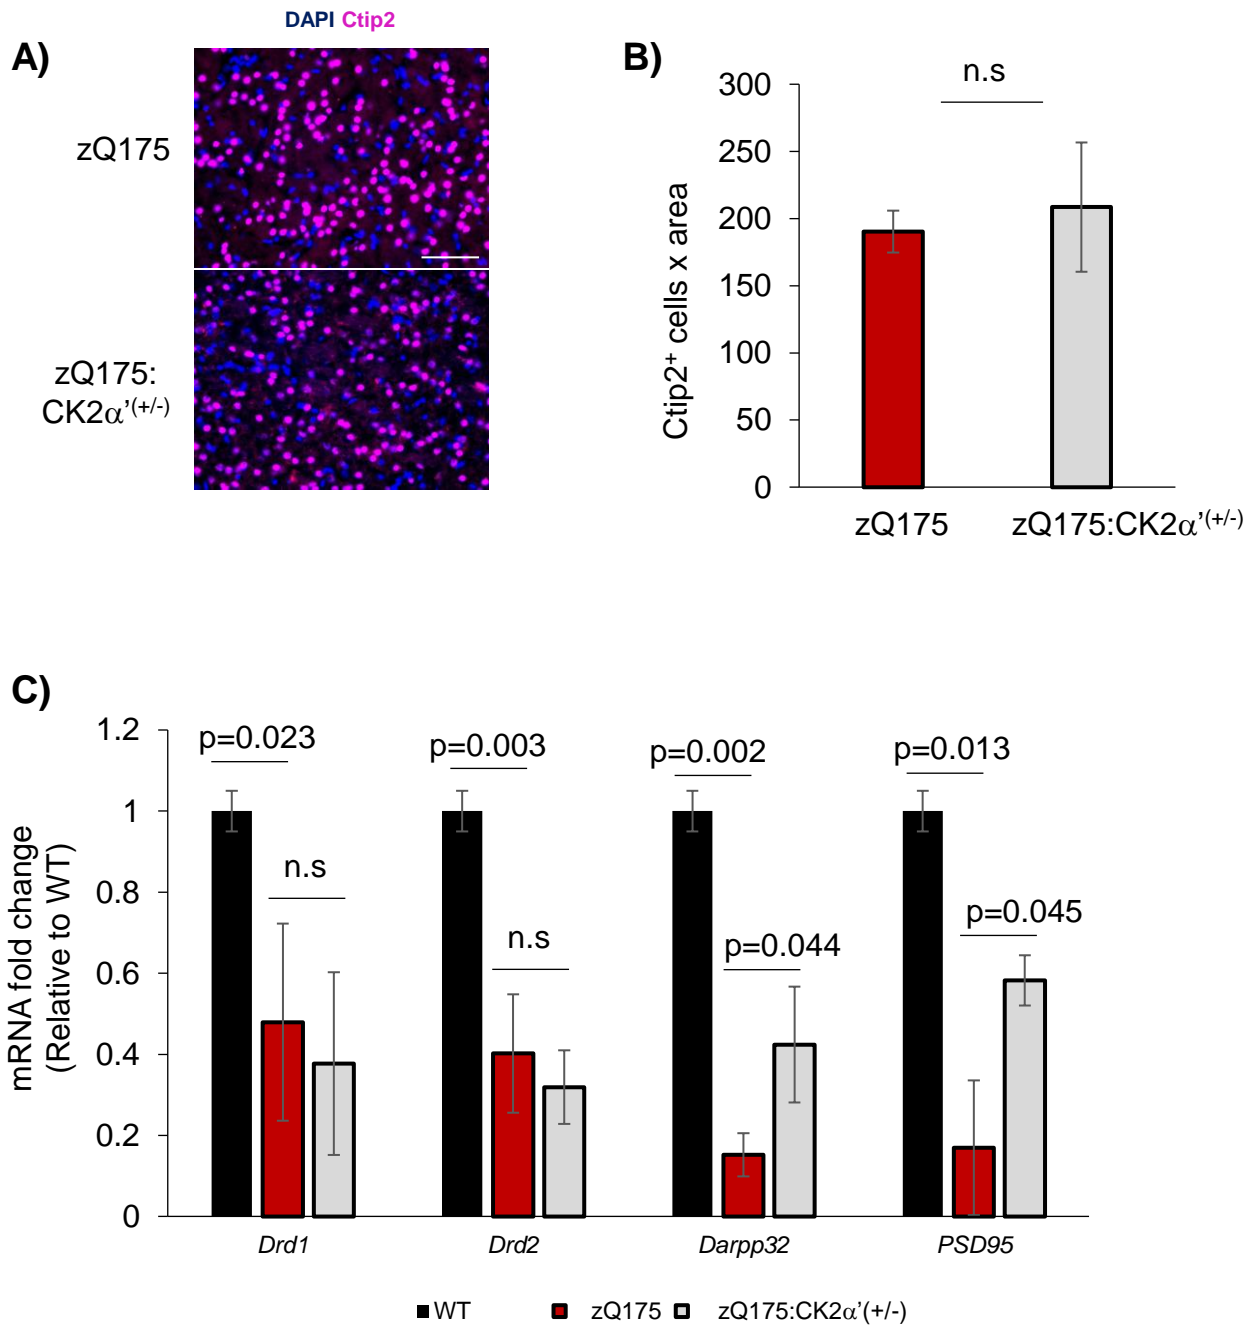

**Figure S5**

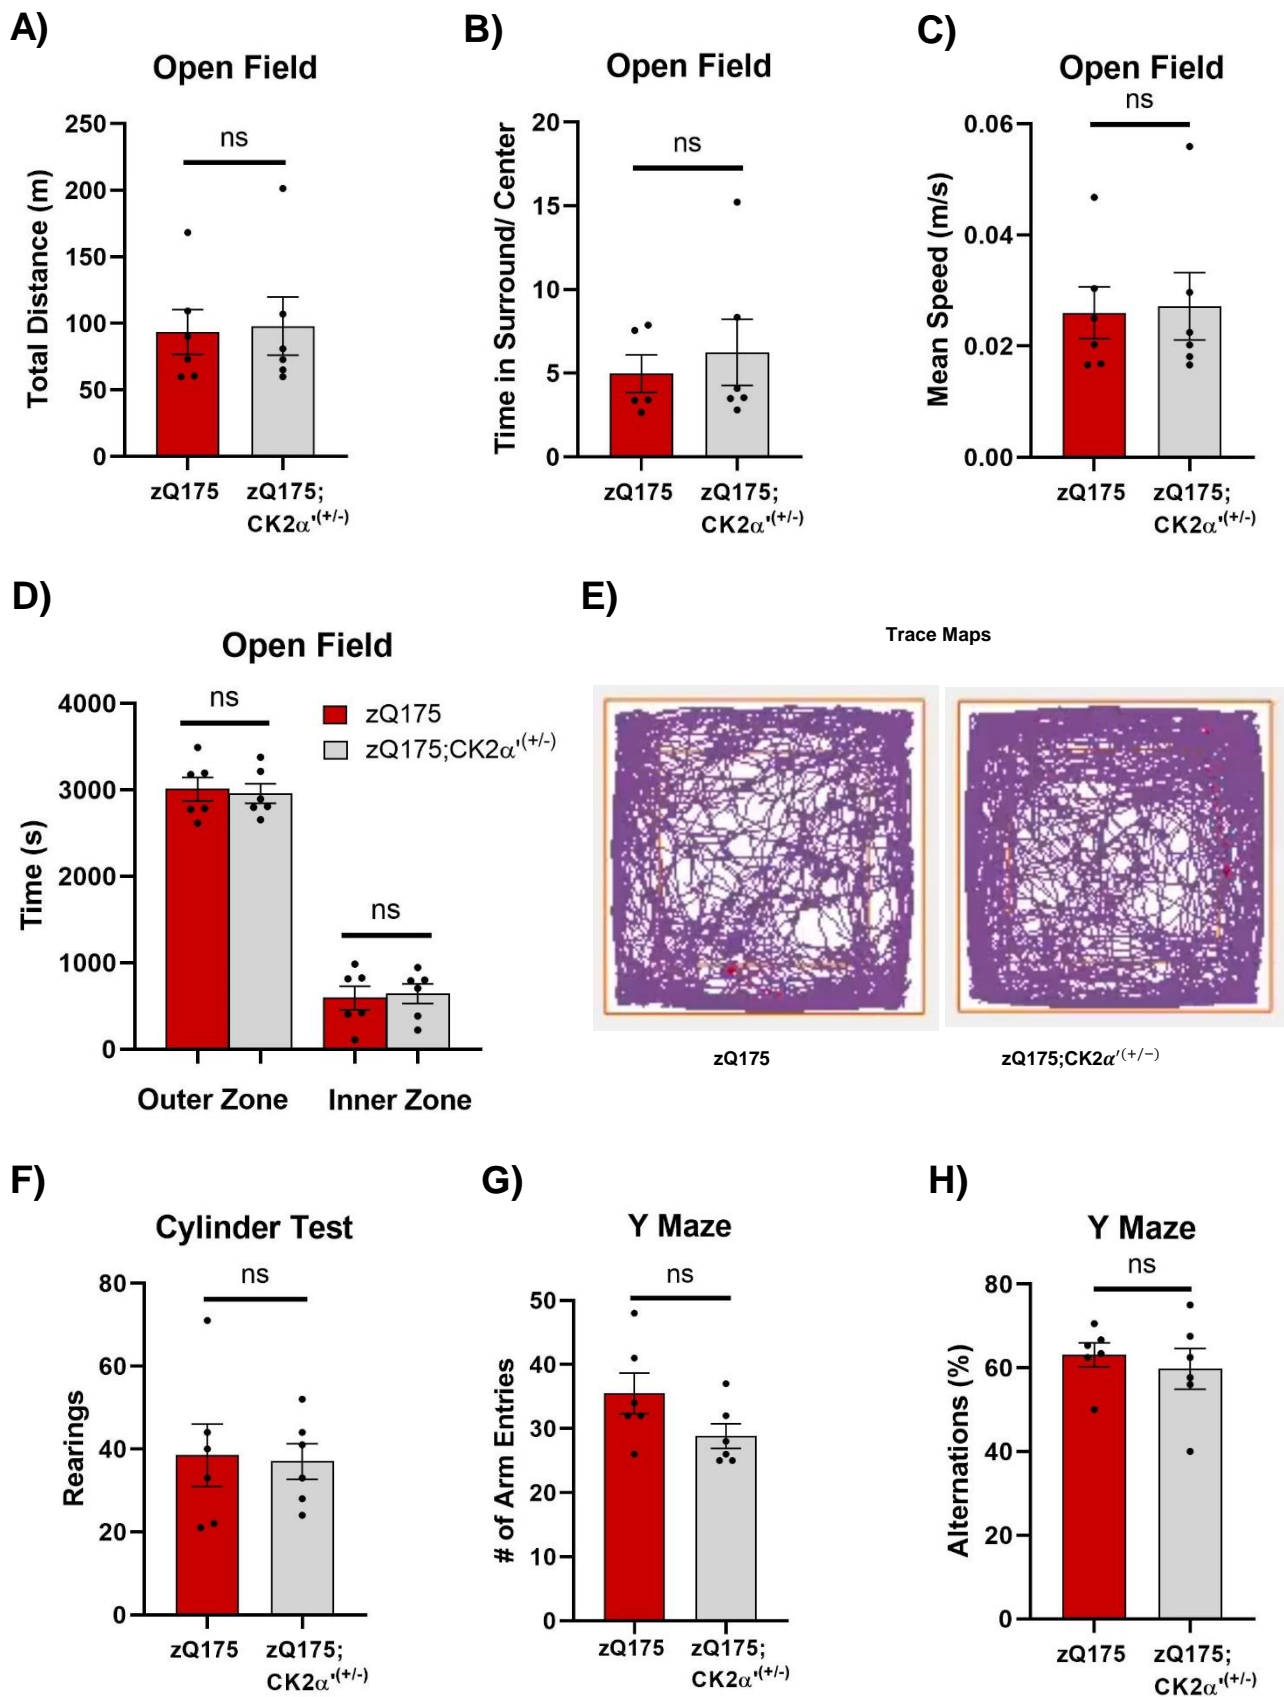

**Figure S6**

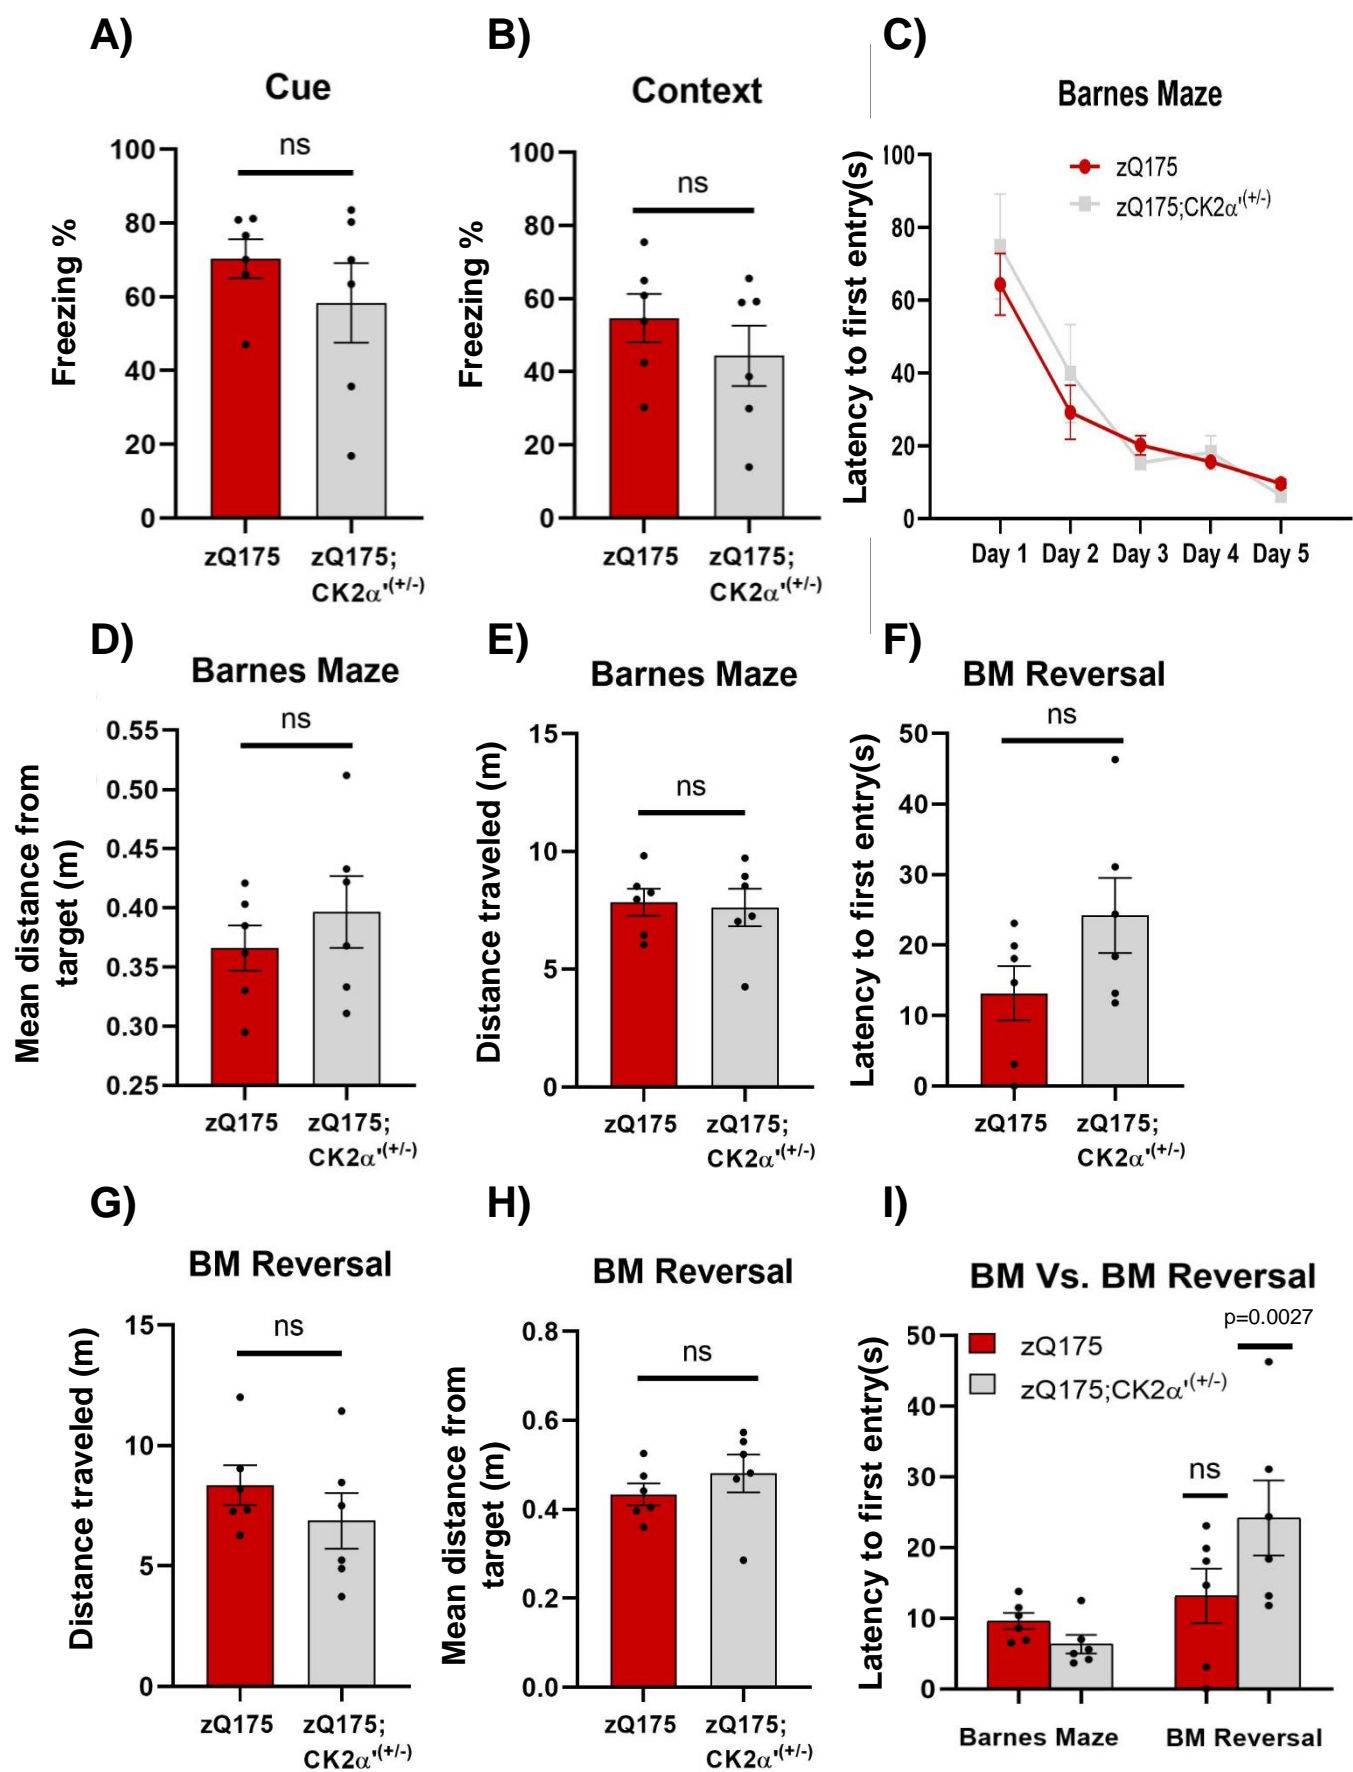

**Figure S7**



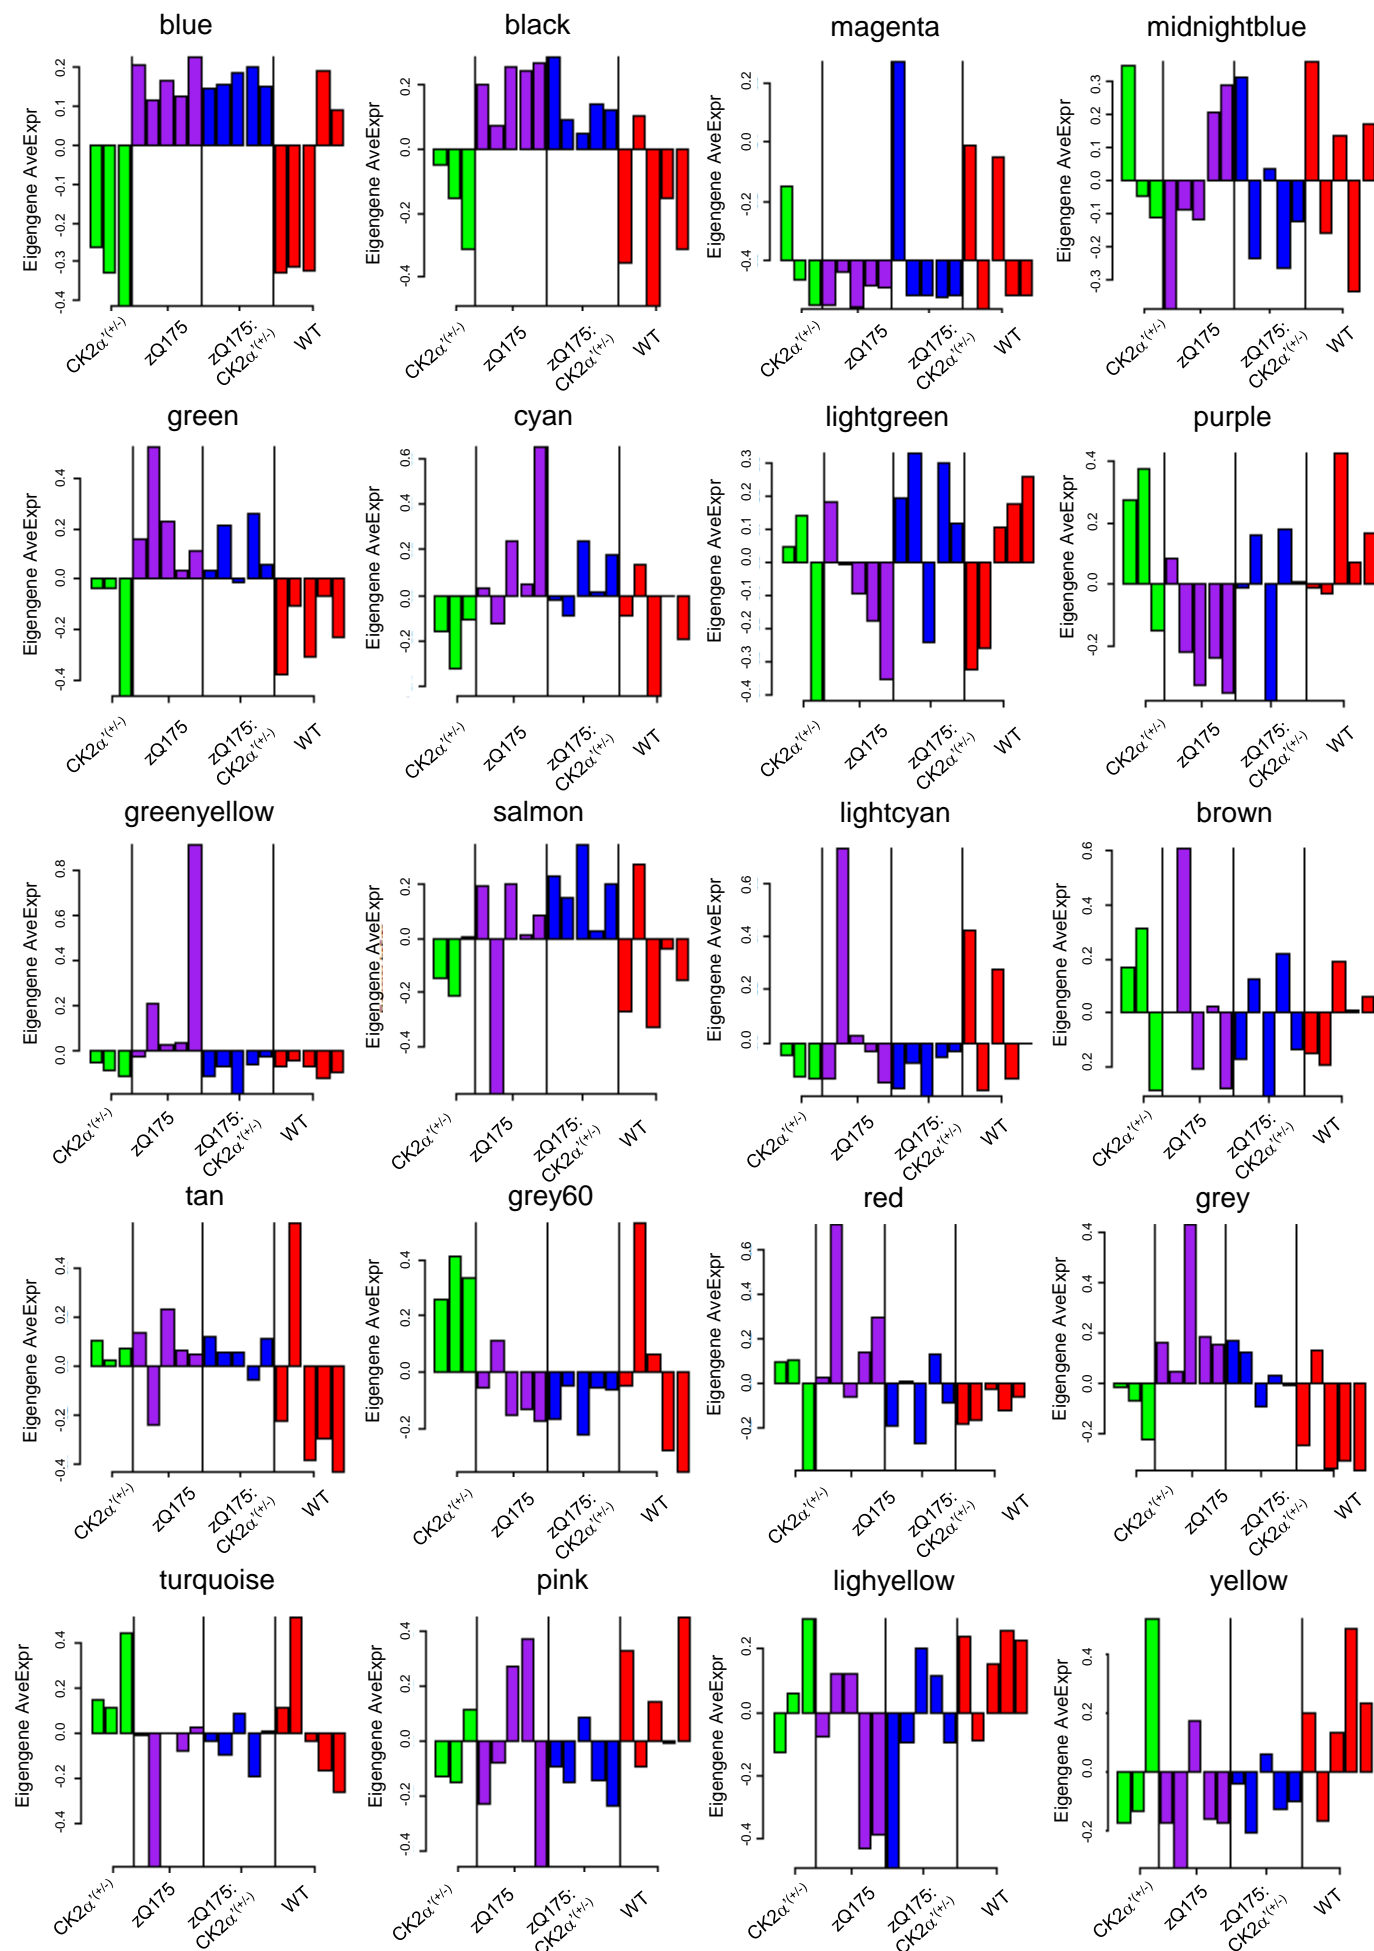

**Figure S8**

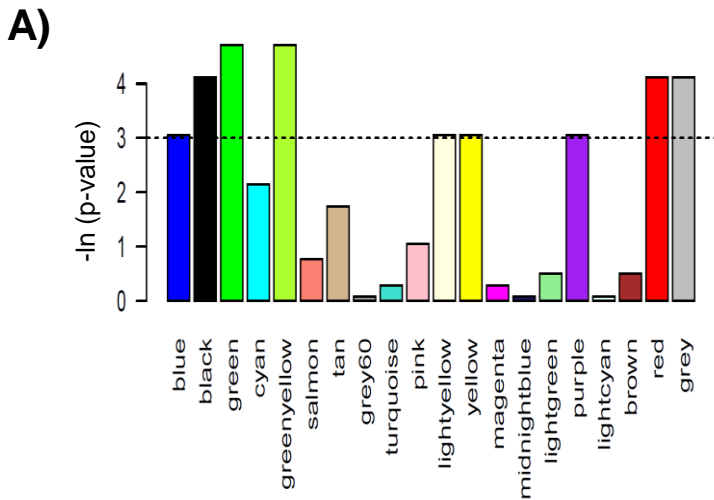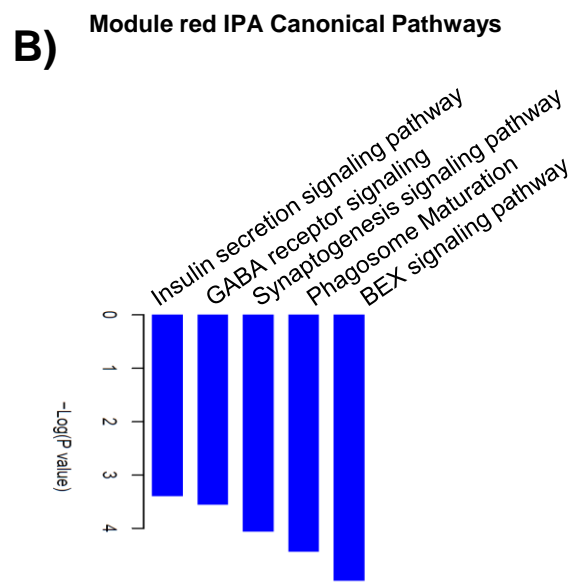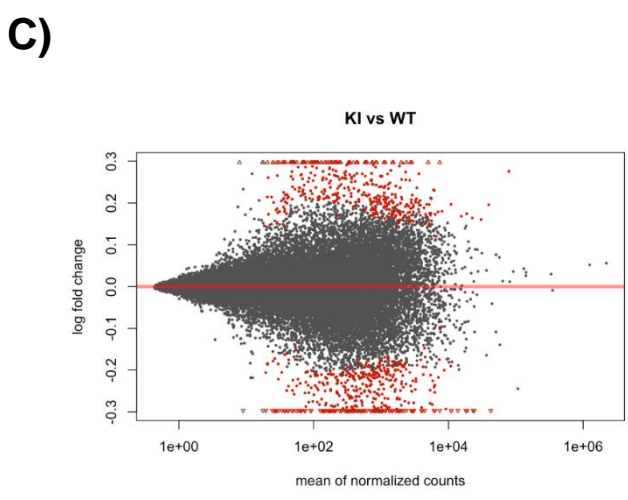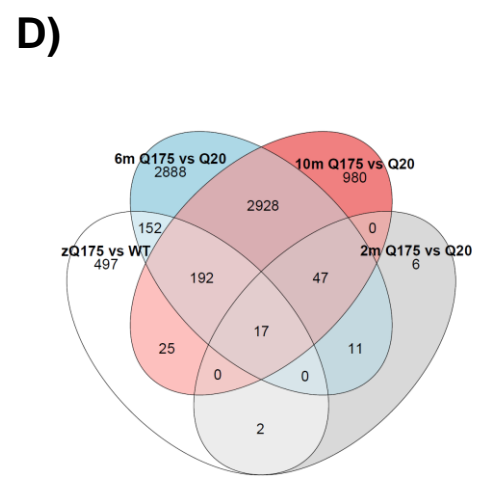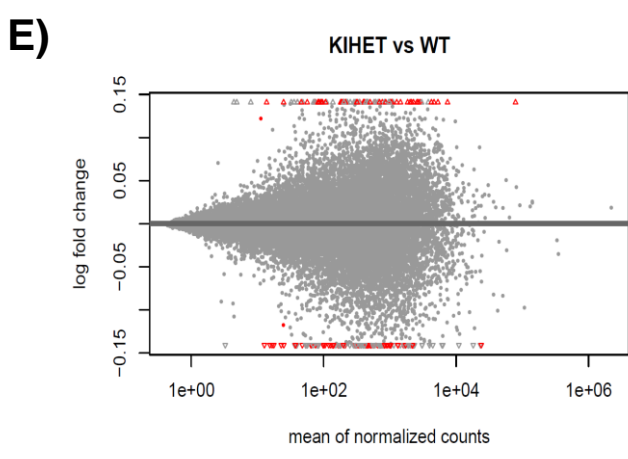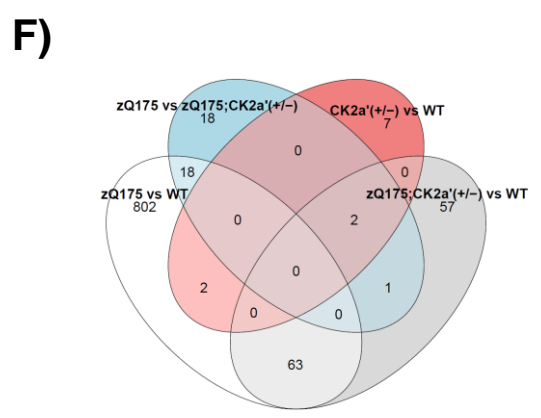

**Figure S9**

A)

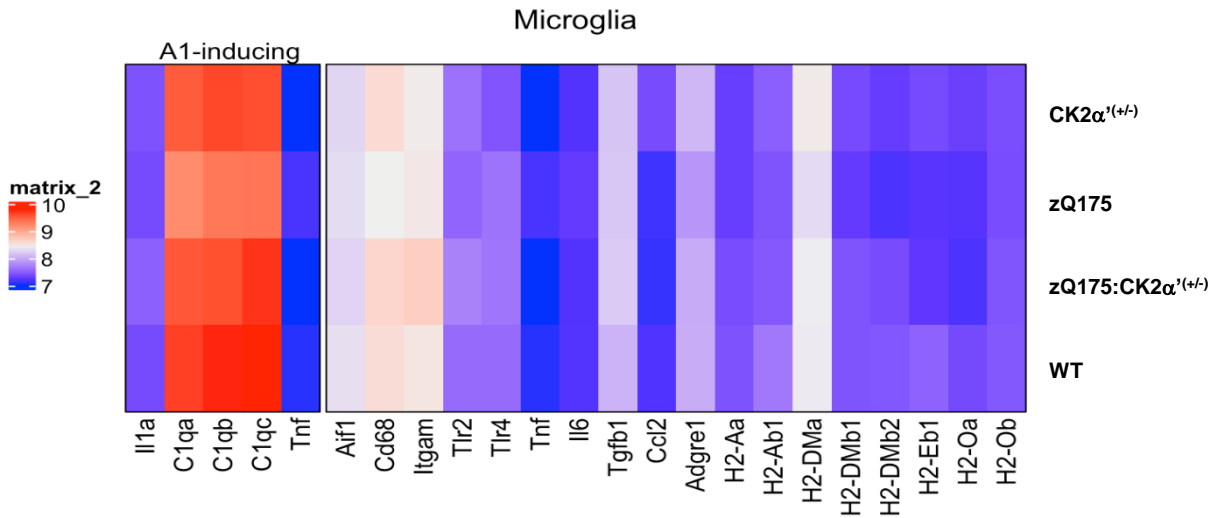

B)

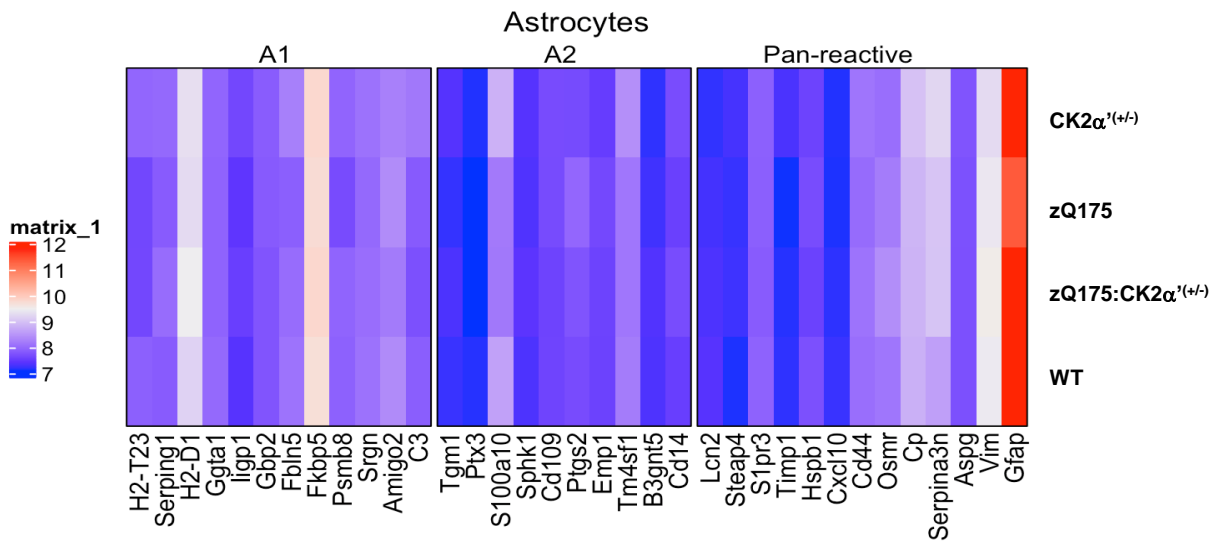

C)

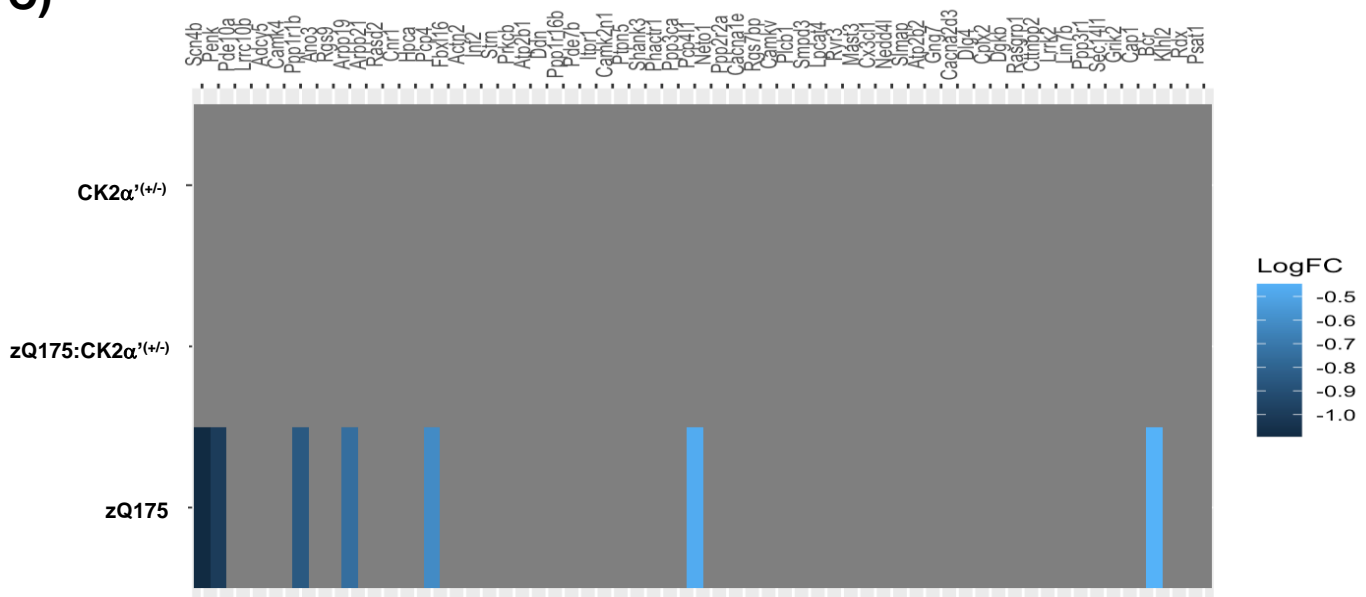

Figure S10

| <b>Table S1. WGCNA Modules Genes</b> |               |             |  |                    |             |           |
|--------------------------------------|---------------|-------------|--|--------------------|-------------|-----------|
| EnsemblID                            | GeneSymbol    | WGCNAmodule |  | EnsemblID          | GeneSymbol  | WGCNAmodu |
| ENSMUSG00000036469                   | 43891         | 19          |  | ENSMUSG00000047557 | Lxn         | 20        |
| ENSMUSG00000073481                   | 43892         | 19          |  | ENSMUSG00000075602 | Ly6a        | 1         |
| ENSMUSG00000079557                   | 43892         | 9           |  | ENSMUSG00000079018 | Ly6c1       | 1         |
| ENSMUSG00000032656                   | 43893         | 9           |  | ENSMUSG00000022587 | Ly6e        | 5         |
| ENSMUSG00000039372                   | 43894         | 9           |  | ENSMUSG00000073413 | Ly6g6d      | 20        |
| ENSMUSG00000039100                   | 43896         | 2           |  | ENSMUSG00000034923 | Ly6g6f      | 3         |
| ENSMUSG00000026977                   | 43897         | 4           |  | ENSMUSG00000022577 | Ly6h        | 20        |
| ENSMUSG00000025702                   | 43898         | 9           |  | ENSMUSG00000026980 | Ly75        | 20        |
| ENSMUSG00000040502                   | 43899         | 20          |  | ENSMUSG00000021423 | Ly86        | 18        |
| ENSMUSG00000078627                   | 43900         | 20          |  | ENSMUSG00000004707 | Ly9         | 20        |
| ENSMUSG00000022269                   | 43901         | 18          |  | ENSMUSG00000025779 | Ly96        | 20        |
| ENSMUSG00000000486                   | 44075         | 20          |  | ENSMUSG00000067367 | Lyar        | 20        |
| ENSMUSG00000026276                   | 44076         | 20          |  | ENSMUSG00000034041 | Lyl1        | 12        |
| ENSMUSG00000022456                   | 44077         | 19          |  | ENSMUSG00000042228 | Lyn         | 20        |
| ENSMUSG00000020486                   | 44078         | 16          |  | ENSMUSG00000022594 | Lynx1       | 18        |
| ENSMUSG00000072214                   | 44079         | 9           |  | ENSMUSG00000026344 | Lypd1       | 20        |
| ENSMUSG00000050379                   | 44080         | 19          |  | ENSMUSG00000050447 | Lypd6       | 20        |
| ENSMUSG00000001833                   | 44081         | 1           |  | ENSMUSG00000026765 | Lypd6b      | 17        |
| ENSMUSG00000018398                   | 44082         | 20          |  | ENSMUSG00000025903 | Lypla1      | 9         |
| ENSMUSG00000059248                   | 44083         | 20          |  | ENSMUSG00000028670 | Lypla2      | 16        |
| ENSMUSG00000019917                   | 44084         | 20          |  | ENSMUSG00000039246 | Lyplal1     | 20        |
| ENSMUSG00000058013                   | 44085         | 9           |  | ENSMUSG00000030922 | Lyrm1       | 20        |
| ENSMUSG00000007777                   | 0610009B22Rik | 20          |  | ENSMUSG00000045854 | Lyrm2       | 20        |
| ENSMUSG00000086714                   | 0610009E02Rik | 20          |  | ENSMUSG00000046573 | Lyrm4       | 9         |
| ENSMUSG00000043644                   | 0610009L18Rik | 20          |  | ENSMUSG00000020268 | Lyrm7       | 1         |
| ENSMUSG00000042208                   | 0610010F05Rik | 9           |  | ENSMUSG00000072640 | Lyrm9       | 20        |
| ENSMUSG00000020831                   | 0610010K14Rik | 20          |  | ENSMUSG00000053769 | Lysmd1      | 20        |
| ENSMUSG00000107002                   | 0610012G03Rik | 12          |  | ENSMUSG00000032184 | Lysmd2      | 20        |
| ENSMUSG00000097882                   | 0610038B21Rik | 20          |  | ENSMUSG00000035840 | Lysmd3      | 20        |
| ENSMUSG00000089889                   | 0610040B10Rik | 20          |  | ENSMUSG00000043831 | Lysmd4      | 20        |
| ENSMUSG00000087341                   | 0610040F04Rik | 20          |  | ENSMUSG00000019726 | Lyst        | 9         |
| ENSMUSG00000060512                   | 0610040J01Rik | 20          |  | ENSMUSG00000030787 | Lyve1       | 20        |
| ENSMUSG00000087361                   | 0610043K17Rik | 20          |  | ENSMUSG00000069516 | Lyz2        | 20        |
| ENSMUSG00000090066                   | 1110002E22Rik | 5           |  | ENSMUSG00000032530 | Lyzl4       | 20        |
| ENSMUSG00000097134                   | 1110002J07Rik | 20          |  | ENSMUSG00000028990 | Lzic        | 1         |
| ENSMUSG00000071456                   | 1110002L01Rik | 19          |  | ENSMUSG00000025245 | Lztf1l      | 2         |
| ENSMUSG00000102531                   | 1110002O04Rik | 20          |  | ENSMUSG00000022761 | Lztr1       | 20        |
| ENSMUSG00000106291                   | 1110003F10Rik | 20          |  | ENSMUSG00000036306 | Lzts1       | 9         |
| ENSMUSG00000030663                   | 1110004F10Rik | 3           |  | ENSMUSG00000035342 | Lzts2       | 20        |
| ENSMUSG00000039195                   | 1110008P14Rik | 12          |  | ENSMUSG00000037703 | Lzts3       | 9         |
| ENSMUSG00000045237                   | 1110012L19Rik | 20          |  | ENSMUSG00000055125 | M5C1000I18F | 5         |
| ENSMUSG00000116164                   | 1110013H19Rik | 20          |  | ENSMUSG00000007458 | M6pr        | 20        |
| ENSMUSG00000098659                   | 1110015O18Rik | 20          |  | ENSMUSG00000080832 | M6pr-ps     | 20        |
| ENSMUSG00000028441                   | 1110017D15Rik | 12          |  | ENSMUSG00000022805 | Maats1      | 14        |
| ENSMUSG00000085151                   | 1110018N20Rik | 6           |  | ENSMUSG00000056947 | Mab21l1     | 6         |
| ENSMUSG00000097616                   | 1110019D14Rik | 19          |  | ENSMUSG00000028649 | Macf1       | 19        |
| ENSMUSG00000097047                   | 1110020A21Rik | 12          |  | ENSMUSG00000028826 | Maco1       | 20        |
| ENSMUSG00000103520                   | 1110025M09Rik | 20          |  | ENSMUSG00000036278 | Macrodl     | 20        |
| ENSMUSG00000085972                   | 1110028F11Rik | 20          |  | ENSMUSG00000068205 | Macrodl2    | 12        |
| ENSMUSG00000037971                   | 1110032A03Rik | 20          |  | ENSMUSG00000074763 | Macrodl2os2 | 20        |
| ENSMUSG00000046999                   | 1110032F04Rik | 20          |  | ENSMUSG00000029554 | Mad1l1      | 20        |
| ENSMUSG00000092203                   | 1110038B12Rik | 10          |  | ENSMUSG00000029910 | Mad2l1      | 12        |
| ENSMUSG00000063236                   | 1110038F14Rik | 19          |  | ENSMUSG00000034509 | Mad2l1bp    | 20        |

|                    |               |    |                    |             |    |
|--------------------|---------------|----|--------------------|-------------|----|
| ENSMUSG0000085457  | 1110046J04Rik | 20 | ENSMUSG0000029003  | Mad2l2      | 20 |
| ENSMUSG0000040591  | 1110051M20Rik | 20 | ENSMUSG0000040687  | Madd        | 20 |
| ENSMUSG0000035171  | 1110059E24Rik | 20 | ENSMUSG0000079562  | Maea        | 20 |
| ENSMUSG0000032551  | 1110059G10Rik | 19 | ENSMUSG0000055435  | Maf         | 20 |
| ENSMUSG0000078570  | 1110065P20Rik | 20 | ENSMUSG0000022553  | Maf1        | 20 |
| ENSMUSG0000043687  | 1190005I06Rik | 3  | ENSMUSG0000047591  | Mafa        | 9  |
| ENSMUSG0000063320  | 1190007I07Rik | 10 | ENSMUSG0000074622  | Mafb        | 20 |
| ENSMUSG0000097290  | 1300002E11Rik | 20 | ENSMUSG0000042622  | Maff        | 20 |
| ENSMUSG00000112545 | 1300014J16Rik | 20 | ENSMUSG0000051510  | Mafg        | 20 |
| ENSMUSG0000096221  | 1500002C15Rik | 20 | ENSMUSG0000018143  | Mafk        | 20 |
| ENSMUSG0000097595  | 1500002F19Rik | 20 | ENSMUSG0000036634  | Mag         | 16 |
| ENSMUSG0000098912  | 1500004A13Rik | 20 | ENSMUSG0000082106  | Mageb16-ps1 | 20 |
| ENSMUSG0000068099  | 1500009C09Rik | 20 | ENSMUSG0000025151  | Maged1      | 9  |
| ENSMUSG0000087651  | 1500009L16Rik | 9  | ENSMUSG0000025268  | Maged2      | 9  |
| ENSMUSG00000072694 | 1500011B03Rik | 19 | ENSMUSG00000031227 | Magee1      | 19 |
| ENSMUSG00000098702 | 1500015A07Rik | 20 | ENSMUSG00000031224 | Magee2      | 20 |
| ENSMUSG00000094732 | 1500015L24Rik | 20 | ENSMUSG00000116632 | Magef1      | 20 |
| ENSMUSG00000097383 | 1500026H17Rik | 20 | ENSMUSG00000047238 | Mageh1      | 20 |
| ENSMUSG00000059631 | 1500035N22Rik | 1  | ENSMUSG00000056972 | Magel2      | 20 |
| ENSMUSG00000035595 | 1600002K03Rik | 20 | ENSMUSG00000045095 | Magi1       | 20 |
| ENSMUSG00000050088 | 1600012H06Rik | 13 | ENSMUSG00000040003 | Magi2       | 6  |
| ENSMUSG00000054676 | 1600014C10Rik | 12 | ENSMUSG00000052539 | Magi3       | 3  |
| ENSMUSG00000097048 | 1600020E01Rik | 18 | ENSMUSG00000028609 | Magoh       | 12 |
| ENSMUSG00000104986 | 1600023N17Rik | 18 | ENSMUSG00000030188 | Magohb      | 12 |
| ENSMUSG00000057818 | 1600029O15Rik | 2  | ENSMUSG00000031232 | Magt1       | 20 |
| ENSMUSG00000085984 | 1700001G11Rik | 20 | ENSMUSG00000025971 | Maip1       | 20 |
| ENSMUSG00000075511 | 1700001L05Rik | 20 | ENSMUSG00000021363 | Mak         | 20 |
| ENSMUSG00000021534 | 1700001L19Rik | 20 | ENSMUSG00000031578 | Mak16       | 9  |
| ENSMUSG00000044320 | 1700001O22Rik | 20 | ENSMUSG00000027375 | Mal         | 16 |
| ENSMUSG00000085944 | 1700003D09Rik | 9  | ENSMUSG00000024479 | Mal2        | 20 |
| ENSMUSG00000030030 | 1700003E16Rik | 20 | ENSMUSG00000092341 | Malat1      | 9  |
| ENSMUSG00000038523 | 1700003F12Rik | 20 | ENSMUSG00000027377 | Mall        | 20 |
| ENSMUSG00000085389 | 1700003M07Rik | 20 | ENSMUSG00000075520 | Malrd1      | 20 |
| ENSMUSG00000100274 | 1700006F04Rik | 20 | ENSMUSG00000029815 | Malsu1      | 2  |
| ENSMUSG00000101234 | 1700007E05Rik | 20 | ENSMUSG00000032688 | Malt1       | 20 |
| ENSMUSG00000100666 | 1700007F19Rik | 20 | ENSMUSG00000033207 | Mamdc2      | 20 |
| ENSMUSG00000026831 | 1700007K13Rik | 13 | ENSMUSG00000026941 | Mamdc4      | 20 |
| ENSMUSG00000097318 | 1700007L15Rik | 20 | ENSMUSG00000050567 | Maml1       | 20 |
| ENSMUSG00000103452 | 1700008A23Rik | 20 | ENSMUSG00000031925 | Maml2       | 20 |
| ENSMUSG00000101225 | 1700008J07Rik | 17 | ENSMUSG00000061143 | Maml3       | 1  |
| ENSMUSG0000008028  | 1700008O03Rik | 20 | ENSMUSG00000059401 | Maml1d1     | 1  |
| ENSMUSG00000096573 | 1700009J07Rik | 20 | ENSMUSG00000042918 | Mamstr      | 20 |
| ENSMUSG00000023873 | 1700010I14Rik | 9  | ENSMUSG00000003746 | Man1a       | 9  |
| ENSMUSG00000031927 | 1700012B09Rik | 14 | ENSMUSG00000008763 | Man1a2      | 20 |
| ENSMUSG00000110424 | 1700012D14Rik | 20 | ENSMUSG00000036646 | Man1b1      | 20 |
| ENSMUSG00000105023 | 1700012D16Rik | 20 | ENSMUSG00000037306 | Man1c1      | 20 |
| ENSMUSG00000027886 | 1700013F07Rik | 20 | ENSMUSG00000024085 | Man2a1      | 20 |
| ENSMUSG00000051054 | 1700014D04Rik | 20 | ENSMUSG00000038886 | Man2a2      | 9  |
| ENSMUSG00000104908 | 1700015C17Rik | 20 | ENSMUSG00000005142 | Man2b1      | 20 |
| ENSMUSG00000102737 | 1700016A09Rik | 20 | ENSMUSG00000029119 | Man2b2      | 12 |
| ENSMUSG00000108979 | 1700016B15Rik | 20 | ENSMUSG00000032295 | Man2c1      | 20 |
| ENSMUSG00000053783 | 1700016K19Rik | 14 | ENSMUSG00000086728 | Man2c1os    | 1  |
| ENSMUSG00000085609 | 1700016P03Rik | 20 | ENSMUSG00000028164 | Manba       | 20 |
| ENSMUSG00000032300 | 1700017B05Rik | 20 | ENSMUSG00000063019 | Manbal      | 1  |
| ENSMUSG00000038408 | 1700018A04Rik | 20 | ENSMUSG00000040520 | Manea       | 20 |

|                     |                |    |                    |          |    |
|---------------------|----------------|----|--------------------|----------|----|
| ENSMUSG00000100075  | 1700018L02Rik  | 20 | ENSMUSG00000042763 | Maneal   | 20 |
| ENSMUSG00000060715  | 1700019A02Rik  | 20 | ENSMUSG00000032575 | Manf     | 20 |
| ENSMUSG00000043629  | 1700019D03Rik  | 18 | ENSMUSG00000032718 | Mansc1   | 20 |
| ENSMUSG00000100937  | 1700020D05Rik  | 20 | ENSMUSG00000025037 | Maoa     | 18 |
| ENSMUSG00000035085  | 1700020L24Rik  | 20 | ENSMUSG00000040147 | Maob     | 20 |
| ENSMUSG00000019797  | 1700021F05Rik  | 20 | ENSMUSG00000050930 | Map10    | 20 |
| ENSMUSG00000117050  | 1700023B13Rik  | 20 | ENSMUSG00000036948 | Map11    | 20 |
| ENSMUSG00000020940  | 1700023F06Rik  | 20 | ENSMUSG00000027254 | Map1a    | 20 |
| ENSMUSG00000032666  | 1700025G04Rik  | 1  | ENSMUSG00000052727 | Map1b    | 19 |
| ENSMUSG00000097321  | 1700028E10Rik  | 20 | ENSMUSG00000027602 | Map1lc3a | 5  |
| ENSMUSG00000038782  | 1700028J19Rik  | 20 | ENSMUSG00000031812 | Map1lc3b | 2  |
| ENSMUSG00000089798  | 1700028K03Rik  | 20 | ENSMUSG00000019261 | Map1s    | 20 |
| ENSMUSG00000078635  | 1700028N14Rik  | 20 | ENSMUSG00000015222 | Map2     | 4  |
| ENSMUSG00000033053  | 1700028P14Rik  | 14 | ENSMUSG00000004936 | Map2k1   | 18 |
| ENSMUSG00000031452  | 1700029H14Rik  | 2  | ENSMUSG00000035027 | Map2k2   | 20 |
| ENSMUSG00000044916  | 1700029I15Rik  | 13 | ENSMUSG00000018932 | Map2k3   | 20 |
| ENSMUSG00000071103  | 1700029J07Rik  | 9  | ENSMUSG00000042549 | Map2k3os | 20 |
| ENSMUSG00000099759  | 1700030C10Rik  | 20 | ENSMUSG00000033352 | Map2k4   | 19 |
| ENSMUSG00000091071  | 1700030C10Rik  | 20 | ENSMUSG00000058444 | Map2k5   | 20 |
| ENSMUSG00000099869  | 1700030F04Rik  | 20 | ENSMUSG00000020623 | Map2k6   | 20 |
| ENSMUSG00000031847  | 1700030J22Rik  | 9  | ENSMUSG00000002948 | Map2k7   | 20 |
| ENSMUSG00000052794  | 1700030K09Rik  | 20 | ENSMUSG00000021754 | Map3k1   | 18 |
| ENSMUSG00000097893  | 1700034P13Rik  | 20 | ENSMUSG00000040390 | Map3k10  | 9  |
| ENSMUSG00000095956  | 1700036A12Rik  | 20 | ENSMUSG00000004054 | Map3k11  | 20 |
| ENSMUSG00000005983  | 1700037C18Rik  | 20 | ENSMUSG00000023050 | Map3k12  | 20 |
| ENSMUSG00000027327  | 1700037H04Rik  | 3  | ENSMUSG00000033618 | Map3k13  | 20 |
| ENSMUSG00000097515  | 1700040D17Rik  | 20 | ENSMUSG00000020941 | Map3k14  | 9  |
| ENSMUSG00000054822  | 1700041G16Rik  | 20 | ENSMUSG00000031303 | Map3k15  | 13 |
| ENSMUSG00000094103  | 1700047117Rik2 | 20 | ENSMUSG00000051590 | Map3k19  | 13 |
| ENSMUSG00000100147  | 1700047M11Rik  | 20 | ENSMUSG00000024383 | Map3k2   | 2  |
| ENSMUSG00000043773  | 1700048O20Rik  | 9  | ENSMUSG00000004085 | Map3k20  | 19 |
| ENSMUSG00000099681  | 1700052K11Rik  | 20 | ENSMUSG00000031853 | Map3k21  | 9  |
| ENSMUSG00000070997  | 1700055D18Rik  | 20 | ENSMUSG00000020700 | Map3k3   | 9  |
| ENSMUSG000000084792 | 1700056N10Rik  | 20 | ENSMUSG00000014426 | Map3k4   | 20 |
| ENSMUSG00000100837  | 1700063D05Rik  | 20 | ENSMUSG00000071369 | Map3k5   | 18 |
| ENSMUSG00000099266  | 1700063H06Rik  | 20 | ENSMUSG00000028862 | Map3k6   | 20 |
| ENSMUSG00000038323  | 1700066M21Rik  | 1  | ENSMUSG00000028284 | Map3k7   | 1  |
| ENSMUSG00000080980  | 1700071K01Rik  | 20 | ENSMUSG00000025610 | Map3k7cl | 20 |
| ENSMUSG00000084859  | 1700080N15Rik  | 20 | ENSMUSG00000024235 | Map3k8   | 20 |
| ENSMUSG00000113209  | 1700081N11Rik  | 3  | ENSMUSG00000042724 | Map3k9   | 18 |
| ENSMUSG00000086016  | 1700084C06Rik  | 20 | ENSMUSG00000032479 | Map4     | 9  |
| ENSMUSG00000100747  | 1700084E18Rik  | 20 | ENSMUSG00000037337 | Map4k1   | 2  |
| ENSMUSG00000020548  | 1700086D15Rik  | 19 | ENSMUSG00000024242 | Map4k3   | 5  |
| ENSMUSG00000071265  | 1700086L19Rik  | 9  | ENSMUSG00000026074 | Map4k4   | 20 |
| ENSMUSG00000097080  | 1700086O06Rik  | 18 | ENSMUSG00000034761 | Map4k5   | 20 |
| ENSMUSG00000115099  | 1700087I21Rik  | 18 | ENSMUSG00000055407 | Map6     | 18 |
| ENSMUSG00000033029  | 1700088E04Rik  | 18 | ENSMUSG00000041205 | Map6d1   | 16 |
| ENSMUSG00000117289  | 1700093J21Rik  | 20 | ENSMUSG00000019996 | Map7     | 9  |
| ENSMUSG00000020286  | 1700093K21Rik  | 20 | ENSMUSG00000028849 | Map7d1   | 9  |
| ENSMUSG00000118506  | 1700094D03Rik  | 20 | ENSMUSG00000041020 | Map7d2   | 9  |
| ENSMUSG00000105337  | 1700094M23Rik  | 20 | ENSMUSG00000033900 | Map9     | 20 |
| ENSMUSG00000085407  | 1700095J03Rik  | 20 | ENSMUSG00000063358 | Mapk1    | 9  |
| ENSMUSG00000101856  | 1700096K18Rik  | 20 | ENSMUSG00000046709 | Mapk10   | 3  |
| ENSMUSG00000097675  | 1700101I11Rik  | 20 | ENSMUSG00000053137 | Mapk11   | 19 |
| ENSMUSG00000116852  | 1700102H20Rik  | 20 | ENSMUSG00000022610 | Mapk12   | 6  |

|                    |               |    |                    |           |    |
|--------------------|---------------|----|--------------------|-----------|----|
| ENSMUSG0000032611  | 1700102P08Rik | 20 | ENSMUSG00000053436 | Mapk14    | 20 |
| ENSMUSG0000099923  | 1700105P06Rik | 20 | ENSMUSG00000063704 | Mapk15    | 14 |
| ENSMUSG00000008307 | 1700109H08Rik | 20 | ENSMUSG00000041775 | Mapk1ip1  | 9  |
| ENSMUSG0000099384  | 1700110C19Rik | 20 | ENSMUSG00000021840 | Mapk1ip1l | 20 |
| ENSMUSG00000091329 | 1700112D23Rik | 20 | ENSMUSG00000063065 | Mapk3     | 2  |
| ENSMUSG00000097527 | 1700112J16Rik | 20 | ENSMUSG00000024558 | Mapk4     | 9  |
| ENSMUSG00000096935 | 1700113A16Rik | 20 | ENSMUSG00000042688 | Mapk6     | 20 |
| ENSMUSG00000082488 | 1700119I11Rik | 20 | ENSMUSG00000001034 | Mapk7     | 20 |
| ENSMUSG00000100599 | 1700120C14Rik | 13 | ENSMUSG00000021936 | Mapk8     | 3  |
| ENSMUSG00000086275 | 1700121C08Rik | 1  | ENSMUSG00000027223 | Mapk8ip1  | 20 |
| ENSMUSG00000085614 | 1700123M08Rik | 20 | ENSMUSG00000022619 | Mapk8ip2  | 9  |
| ENSMUSG00000040822 | 1700123O20Rik | 1  | ENSMUSG00000024163 | Mapk8ip3  | 19 |
| ENSMUSG00000101481 | 1700123O21Rik | 20 | ENSMUSG00000020366 | Mapk9     | 3  |
| ENSMUSG00000099354 | 1700124L16Rik | 20 | ENSMUSG00000038696 | Mapkap1   | 9  |
| ENSMUSG00000107802 | 1700126G02Rik | 20 | ENSMUSG00000016528 | Mapkap2   | 3  |
| ENSMUSG00000071653 | 1810009A15Rik | 20 | ENSMUSG00000032577 | Mapkap3   | 20 |
| ENSMUSG00000078607 | 1810010H24Rik | 20 | ENSMUSG00000029454 | Mapkap5   | 20 |
| ENSMUSG00000022507 | 1810013L24Rik | 3  | ENSMUSG00000033902 | Mapkbp1   | 9  |
| ENSMUSG00000097412 | 1810014B01Rik | 20 | ENSMUSG00000027479 | Mapre1    | 1  |
| ENSMUSG00000097115 | 1810019N24Rik | 20 | ENSMUSG00000024277 | Mapre2    | 20 |
| ENSMUSG00000089997 | 1810020O05Rik | 1  | ENSMUSG00000029166 | Mapre3    | 20 |
| ENSMUSG00000087331 | 1810021B22Rik | 20 | ENSMUSG00000018411 | Mapt      | 20 |
| ENSMUSG00000044145 | 1810024B03Rik | 20 | ENSMUSG00000069662 | Marcks    | 20 |
| ENSMUSG00000101970 | 1810026B05Rik | 20 | ENSMUSG00000047945 | Marcks1   | 9  |
| ENSMUSG00000044148 | 1810030O07Rik | 20 | ENSMUSG00000060657 | Marf1     | 18 |
| ENSMUSG00000054091 | 1810037I17Rik | 3  | ENSMUSG00000026620 | Mark1     | 9  |
| ENSMUSG00000100680 | 1810044D09Rik | 20 | ENSMUSG00000024969 | Mark2     | 9  |
| ENSMUSG00000035372 | 1810055G02Rik | 20 | ENSMUSG00000007411 | Mark3     | 6  |
| ENSMUSG00000073155 | 1810058I24Rik | 9  | ENSMUSG00000030397 | Mark4     | 9  |
| ENSMUSG00000108207 | 1810059H22Rik | 20 | ENSMUSG00000040354 | Mars      | 20 |
| ENSMUSG00000084925 | 1810062O18Rik | 20 | ENSMUSG00000046994 | Mars2     | 3  |
| ENSMUSG00000087165 | 2010001A14Rik | 20 | ENSMUSG00000044345 | Marveld1  | 19 |
| ENSMUSG00000051606 | 2010001K21Rik | 14 | ENSMUSG00000021636 | Marveld2  | 20 |
| ENSMUSG00000044694 | 2010007H06Rik | 20 | ENSMUSG00000001672 | Marveld3  | 19 |
| ENSMUSG00000029384 | 2010109A12Rik | 20 | ENSMUSG00000068037 | Mas1      | 20 |
| ENSMUSG00000063018 | 2010204K13Rik | 20 | ENSMUSG00000117942 | Maskbp3   | 20 |
| ENSMUSG00000026090 | 2010300C02Rik | 9  | ENSMUSG00000022887 | Masp1     | 20 |
| ENSMUSG00000101268 | 2010310C07Rik | 20 | ENSMUSG00000028979 | Masp2     | 20 |
| ENSMUSG00000074217 | 2210011C24Rik | 12 | ENSMUSG00000053693 | Mast1     | 19 |
| ENSMUSG00000021550 | 2210016F16Rik | 20 | ENSMUSG00000003810 | Mast2     | 9  |
| ENSMUSG00000029559 | 2210016L21Rik | 20 | ENSMUSG00000031833 | Mast3     | 1  |
| ENSMUSG00000039563 | 2210406O10Rik | 20 | ENSMUSG00000034751 | Mast4     | 18 |
| ENSMUSG00000087380 | 2210408F21Rik | 20 | ENSMUSG00000026779 | Mastl     | 1  |
| ENSMUSG00000071252 | 2210408I21Rik | 20 | ENSMUSG00000053907 | Mat2a     | 20 |
| ENSMUSG00000085563 | 2210411M09Rik | 20 | ENSMUSG00000042032 | Mat2b     | 9  |
| ENSMUSG00000107216 | 2210412B16Rik | 10 | ENSMUSG00000004933 | Matk      | 20 |
| ENSMUSG00000078894 | 2210418O10Rik | 1  | ENSMUSG00000040533 | Matn1     | 20 |
| ENSMUSG00000032403 | 2300009A05Rik | 20 | ENSMUSG00000022324 | Matn2     | 18 |
| ENSMUSG00000097354 | 2310001H17Rik | 20 | ENSMUSG00000016995 | Matn4     | 20 |
| ENSMUSG00000098332 | 2310009A05Rik | 1  | ENSMUSG00000037236 | Matr3     | 2  |
| ENSMUSG00000079283 | 2310009B15Rik | 20 | ENSMUSG00000031858 | Mau2      | 20 |
| ENSMUSG00000097162 | 2310010J17Rik | 18 | ENSMUSG00000037523 | Mavs      | 20 |
| ENSMUSG00000020133 | 2310011J03Rik | 20 | ENSMUSG00000059436 | Max       | 18 |
| ENSMUSG00000085945 | 2310014F06Rik | 20 | ENSMUSG00000030678 | Maz       | 20 |
| ENSMUSG00000097729 | 2310015A10Rik | 20 | ENSMUSG00000051065 | Mb21d2    | 18 |

|                    |                |    |                    |         |    |
|--------------------|----------------|----|--------------------|---------|----|
| ENSMUSG0000049643  | 2310022A10Rik  | 20 | ENSMUSG00000024561 | Mbd1    | 20 |
| ENSMUSG00000031983 | 2310022B05Rik  | 20 | ENSMUSG00000024513 | Mbd2    | 9  |
| ENSMUSG00000097710 | 2310026I22Rik  | 20 | ENSMUSG00000035478 | Mbd3    | 3  |
| ENSMUSG00000032062 | 2310030G06Rik  | 1  | ENSMUSG00000030322 | Mbd4    | 3  |
| ENSMUSG00000020441 | 2310033P09Rik  | 20 | ENSMUSG00000036792 | Mbd5    | 7  |
| ENSMUSG00000099655 | 2310034G01Rik  | 20 | ENSMUSG00000025409 | Mbd6    | 20 |
| ENSMUSG00000062619 | 2310039H08Rik  | 20 | ENSMUSG00000021028 | Mbip    | 20 |
| ENSMUSG00000072852 | 2310040G07Rik  | 20 | ENSMUSG00000049285 | Mblac1  | 20 |
| ENSMUSG00000108732 | 2310043P16Rik  | 20 | ENSMUSG00000051098 | Mblac2  | 20 |
| ENSMUSG00000040177 | 2310057M21Rik  | 19 | ENSMUSG00000027763 | Mbn1    | 7  |
| ENSMUSG00000085379 | 2310058D17Rik  | 20 | ENSMUSG00000022139 | Mbn2    | 9  |
| ENSMUSG00000050705 | 2310061I04Rik  | 9  | ENSMUSG00000038732 | Mboat1  | 20 |
| ENSMUSG00000100084 | 2310068I16Rik  | 9  | ENSMUSG00000020646 | Mboat2  | 9  |
| ENSMUSG00000089718 | 2310075C17Rik  | 1  | ENSMUSG00000035596 | Mboat7  | 20 |
| ENSMUSG00000045411 | 2410002F23Rik  | 20 | ENSMUSG00000041607 | Mbp     | 16 |
| ENSMUSG00000036873 | 2410004B18Rik  | 20 | ENSMUSG00000059474 | Mbtd1   | 20 |
| ENSMUSG00000071398 | 2410004P03Rik  | 14 | ENSMUSG00000031835 | Mbtps1  | 9  |
| ENSMUSG00000086841 | 2410006H16Rik  | 12 | ENSMUSG00000046873 | Mbtps2  | 20 |
| ENSMUSG00000073164 | 2410018L13Rik  | 20 | ENSMUSG00000038537 | Mc3r    | 20 |
| ENSMUSG00000100017 | 2410022M11Rik  | 20 | ENSMUSG00000047259 | Mc4r    | 20 |
| ENSMUSG00000032840 | 2410131K14Rik  | 20 | ENSMUSG00000032135 | Mcam    | 16 |
| ENSMUSG00000096917 | 2500002B13Rik  | 20 | ENSMUSG00000048755 | Mcat    | 20 |
| ENSMUSG00000073236 | 2500004C02Rik  | 3  | ENSMUSG00000071856 | Mcc     | 19 |
| ENSMUSG00000071632 | 2510002D24Rik  | 2  | ENSMUSG00000027709 | Mccc1   | 20 |
| ENSMUSG00000043391 | 2510009E07Rik  | 9  | ENSMUSG00000086392 | Mccc1os | 9  |
| ENSMUSG00000106825 | 2510016D11Rik  | 1  | ENSMUSG00000021646 | Mccc2   | 20 |
| ENSMUSG00000104891 | 2510017J16Rik  | 20 | ENSMUSG00000033429 | Mcee    | 20 |
| ENSMUSG00000044496 | 2510039O18Rik  | 20 | ENSMUSG00000013974 | Mcomp1  | 20 |
| ENSMUSG00000116797 | 2600002D14Rik  | 20 | ENSMUSG00000031139 | Mcf2    | 18 |
| ENSMUSG00000100303 | 2600014E21Rik  | 19 | ENSMUSG00000031442 | Mcf2l   | 9  |
| ENSMUSG00000103828 | 2610001A08Rik  | 6  | ENSMUSG00000024150 | Mcf2    | 19 |
| ENSMUSG00000052419 | 2610001J05Rik  | 20 | ENSMUSG00000050164 | Mchr1   | 9  |
| ENSMUSG00000031242 | 2610002M06Rik  | 1  | ENSMUSG00000074651 | Mcidas  | 20 |
| ENSMUSG00000071793 | 2610005L07Rik  | 20 | ENSMUSG00000038612 | Mcl1    | 1  |
| ENSMUSG00000060301 | 2610008E11Rik  | 1  | ENSMUSG00000026669 | Mcm10   | 12 |
| ENSMUSG00000102474 | 2610012C04Rik  | 20 | ENSMUSG00000002870 | Mcm2    | 20 |
| ENSMUSG00000097537 | 2610020C07Rik  | 20 | ENSMUSG00000041859 | Mcm3    | 20 |
| ENSMUSG00000091474 | 2610021A01Rik  | 10 | ENSMUSG00000001150 | Mcm3ap  | 9  |
| ENSMUSG00000084362 | 2610024D14Rik  | 20 | ENSMUSG00000022673 | Mcm4    | 20 |
| ENSMUSG00000110997 | 2610028D06Rik  | 20 | ENSMUSG00000005410 | Mcm5    | 18 |
| ENSMUSG00000085562 | 2610028E06Rik  | 20 | ENSMUSG00000026355 | Mcm6    | 20 |
| ENSMUSG00000087259 | 2610035D17Rik  | 20 | ENSMUSG00000029730 | Mcm7    | 20 |
| ENSMUSG00000085555 | 2610035F20Rik  | 20 | ENSMUSG00000027353 | Mcm8    | 20 |
| ENSMUSG00000097536 | 2610037D02Rik  | 10 | ENSMUSG00000058298 | Mcm9    | 2  |
| ENSMUSG00000071302 | 2610044O15Rik8 | 20 | ENSMUSG00000048170 | Mcm8bp  | 1  |
| ENSMUSG00000079671 | 2610203C22Rik  | 20 | ENSMUSG00000046101 | Mcm8c2  | 20 |
| ENSMUSG00000059482 | 2610301B20Rik  | 20 | ENSMUSG00000004567 | Mcoln1  | 2  |
| ENSMUSG00000100164 | 2610306M01Rik  | 20 | ENSMUSG00000039842 | Mcp1    | 1  |
| ENSMUSG00000108614 | 2610306O10Rik  | 20 | ENSMUSG00000061111 | Mcrip1  | 10 |
| ENSMUSG00000085936 | 2610307P16Rik  | 20 | ENSMUSG00000025732 | Mcrip2  | 20 |
| ENSMUSG00000097040 | 2610316D01Rik  | 20 | ENSMUSG00000037570 | Mcrs1   | 20 |
| ENSMUSG00000049916 | 2610318N02Rik  | 20 | ENSMUSG00000021596 | Mctp1   | 9  |
| ENSMUSG0000010277  | 2610507B11Rik  | 18 | ENSMUSG00000032776 | Mctp2   | 18 |
| ENSMUSG00000085882 | 2610507I01Rik  | 19 | ENSMUSG00000000355 | Mcts1   | 20 |
| ENSMUSG00000106691 | 2700029L08Rik  | 20 | ENSMUSG00000042814 | Mcts2   | 20 |



|                    |               |    |                    |        |    |
|--------------------|---------------|----|--------------------|--------|----|
| ENSMUSG0000086328  | 2700033N17Rik | 20 | ENSMUSG0000009647  | Mcu    | 1  |
| ENSMUSG0000097180  | 2700038G22Rik | 20 | ENSMUSG00000027994 | Mcub   | 5  |
| ENSMUSG00000041789 | 2700046A07Rik | 20 | ENSMUSG00000021371 | Mcur1  | 4  |
| ENSMUSG00000097787 | 2700046G09Rik | 9  | ENSMUSG00000061607 | Mdc1   | 20 |
| ENSMUSG00000034601 | 2700049A03Rik | 20 | ENSMUSG00000041390 | Mdfic  | 13 |
| ENSMUSG00000117042 | 2700054A10Rik | 20 | ENSMUSG00000043557 | Mdga1  | 5  |
| ENSMUSG00000024273 | 2700062C07Rik | 20 | ENSMUSG00000034912 | Mdga2  | 20 |
| ENSMUSG00000086172 | 2700068H02Rik | 20 | ENSMUSG00000020321 | Mdh1   | 20 |
| ENSMUSG00000103722 | 2700078F05Rik | 9  | ENSMUSG00000025963 | Mdh1b  | 20 |
| ENSMUSG00000053080 | 2700081O15Rik | 4  | ENSMUSG00000019179 | Mdh2   | 12 |
| ENSMUSG00000062198 | 2700097O09Rik | 20 | ENSMUSG00000027239 | Mdk    | 1  |
| ENSMUSG00000098090 | 2700099C18Rik | 20 | ENSMUSG00000020212 | Mdm1   | 20 |
| ENSMUSG00000087497 | 2810001G20Rik | 12 | ENSMUSG00000020184 | Mdm2   | 20 |
| ENSMUSG00000045464 | 2810002D19Rik | 20 | ENSMUSG00000054387 | Mdm4   | 20 |
| ENSMUSG00000031984 | 2810004N23Rik | 3  | ENSMUSG00000058006 | Mdn1   | 3  |
| ENSMUSG00000047635 | 2810006K23Rik | 20 | ENSMUSG00000002329 | Mdp1   | 6  |
| ENSMUSG00000099881 | 2810013P06Rik | 20 | ENSMUSG00000032418 | Me1    | 18 |
| ENSMUSG00000020491 | 2810021J22Rik | 20 | ENSMUSG00000024556 | Me2    | 9  |
| ENSMUSG00000049881 | 2810025M15Rik | 10 | ENSMUSG00000030621 | Me3    | 6  |
| ENSMUSG00000096995 | 2810029C07Rik | 12 | ENSMUSG00000002768 | Mea1   | 12 |
| ENSMUSG00000037735 | 2810032G03Rik | 20 | ENSMUSG00000028863 | Meaf6  | 9  |
| ENSMUSG00000099034 | 2810039B14Rik | 20 | ENSMUSG00000034105 | Meak7  | 18 |
| ENSMUSG00000100891 | 2810049E08Rik | 20 | ENSMUSG00000027684 | Mecom  | 20 |
| ENSMUSG00000099966 | 2810402E24Rik | 20 | ENSMUSG00000031393 | Mecp2  | 3  |
| ENSMUSG00000086629 | 2810403D21Rik | 20 | ENSMUSG00000028910 | Mecr   | 20 |
| ENSMUSG00000101493 | 2810405F17Rik | 20 | ENSMUSG00000018160 | Med1   | 7  |
| ENSMUSG00000055972 | 2810407A14Rik | 20 | ENSMUSG00000021598 | Med10  | 9  |
| ENSMUSG00000075389 | 2810410L24Rik | 20 | ENSMUSG00000018923 | Med11  | 20 |
| ENSMUSG00000100594 | 2810414N06Rik | 20 | ENSMUSG00000079487 | Med12  | 7  |
| ENSMUSG00000105981 | 2810428J06Rik | 20 | ENSMUSG00000056476 | Med12l | 19 |
| ENSMUSG00000097709 | 2810429I04Rik | 20 | ENSMUSG00000034297 | Med13  | 2  |
| ENSMUSG00000086283 | 2810433D01Rik | 10 | ENSMUSG00000018076 | Med13l | 9  |
| ENSMUSG00000100876 | 2810454H06Rik | 20 | ENSMUSG00000064127 | Med14  | 20 |
| ENSMUSG00000085030 | 2810455O05Rik | 9  | ENSMUSG00000012114 | Med15  | 20 |
| ENSMUSG00000026227 | 2810459M11Rik | 20 | ENSMUSG00000013833 | Med16  | 19 |
| ENSMUSG00000091475 | 2810468N07Rik | 20 | ENSMUSG00000031935 | Med17  | 20 |
| ENSMUSG00000103004 | 2900002M20Rik | 20 | ENSMUSG00000066042 | Med18  | 20 |
| ENSMUSG00000043833 | 2900005J15Rik | 20 | ENSMUSG00000027080 | Med19  | 20 |
| ENSMUSG00000102014 | 2900009J06Rik | 1  | ENSMUSG00000092558 | Med20  | 18 |
| ENSMUSG00000104244 | 2900018N21Rik | 20 | ENSMUSG00000030291 | Med21  | 20 |
| ENSMUSG00000102386 | 2900022M07Rik | 20 | ENSMUSG00000015776 | Med22  | 10 |
| ENSMUSG00000051339 | 2900026A02Rik | 5  | ENSMUSG00000019984 | Med23  | 20 |
| ENSMUSG00000109162 | 2900027M19Rik | 3  | ENSMUSG00000017210 | Med24  | 18 |
| ENSMUSG00000103776 | 2900035J10Rik | 20 | ENSMUSG00000002968 | Med25  | 9  |
| ENSMUSG00000103663 | 2900037B21Rik | 2  | ENSMUSG00000045248 | Med26  | 20 |
| ENSMUSG00000115625 | 2900040C04Rik | 13 | ENSMUSG00000026799 | Med27  | 6  |
| ENSMUSG00000111938 | 2900045O20Rik | 20 | ENSMUSG00000015804 | Med28  | 12 |
| ENSMUSG00000043993 | 2900052L18Rik | 20 | ENSMUSG00000003444 | Med29  | 20 |
| ENSMUSG00000099696 | 2900052N01Rik | 1  | ENSMUSG00000038622 | Med30  | 20 |
| ENSMUSG00000113621 | 2900060N12Rik | 20 | ENSMUSG00000020801 | Med31  | 12 |
| ENSMUSG00000106746 | 2900064F13Rik | 9  | ENSMUSG00000022109 | Med4   | 20 |
| ENSMUSG00000105771 | 2900064K03Rik | 19 | ENSMUSG00000002679 | Med6   | 1  |
| ENSMUSG00000087018 | 2900072N19Rik | 20 | ENSMUSG00000020397 | Med7   | 20 |
| ENSMUSG00000097277 | 2900076A07Rik | 20 | ENSMUSG00000006392 | Med8   | 10 |
| ENSMUSG00000111358 | 2900078I11Rik | 20 | ENSMUSG00000061650 | Med9   | 20 |

|                    |               |    |                    |          |    |
|--------------------|---------------|----|--------------------|----------|----|
| ENSMUSG0000087038  | 2900079G21Rik | 20 | ENSMUSG0000085260  | Med9os   | 20 |
| ENSMUSG0000087484  | 2900089D17Rik | 20 | ENSMUSG0000029659  | Medag    | 18 |
| ENSMUSG00000104034 | 2900092N22Rik | 9  | ENSMUSG0000030557  | Mef2a    | 3  |
| ENSMUSG0000099632  | 2900093K20Rik | 20 | ENSMUSG0000005583  | Mef2c    | 9  |
| ENSMUSG00000102869 | 2900097C17Rik | 13 | ENSMUSG00000001419 | Mef2d    | 7  |
| ENSMUSG0000070282  | 3000002C10Rik | 20 | ENSMUSG00000021268 | Meg3     | 20 |
| ENSMUSG0000084885  | 3010001F23Rik | 2  | ENSMUSG00000024593 | Megf10   | 15 |
| ENSMUSG0000079737  | 3110001I22Rik | 20 | ENSMUSG00000036466 | Megf11   | 16 |
| ENSMUSG00000114649 | 3110006O06Rik | 10 | ENSMUSG00000057751 | Megf6    | 20 |
| ENSMUSG00000026388 | 3110009E18Rik | 20 | ENSMUSG00000045039 | Megf8    | 12 |
| ENSMUSG00000094958 | 3110021N24Rik | 20 | ENSMUSG00000039270 | Megf9    | 19 |
| ENSMUSG00000104861 | 3110039M20Rik | 18 | ENSMUSG00000068117 | Mei1     | 6  |
| ENSMUSG00000025102 | 3110040N11Rik | 20 | ENSMUSG00000043289 | Mei4     | 9  |
| ENSMUSG0000085642  | 3110053B16Rik | 20 | ENSMUSG00000026650 | Meig1    | 20 |
| ENSMUSG0000085622  | 3110056K07Rik | 20 | ENSMUSG00000020160 | Meis1    | 20 |
| ENSMUSG00000103634 | 3110062G12Rik | 20 | ENSMUSG00000027210 | Meis2    | 9  |
| ENSMUSG0000081187  | 3110067C02Rik | 20 | ENSMUSG00000041420 | Meis3    | 20 |
| ENSMUSG00000074635 | 3110070M22Rik | 13 | ENSMUSG00000035683 | Melk     | 1  |
| ENSMUSG00000109625 | 3110080E11Rik | 20 | ENSMUSG00000058704 | Memo1    | 20 |
| ENSMUSG00000103284 | 3110080O07Rik | 20 | ENSMUSG00000001493 | Meox1    | 20 |
| ENSMUSG00000053553 | 3110082I17Rik | 18 | ENSMUSG00000029726 | Mepce    | 20 |
| ENSMUSG0000086815  | 3110082J24Rik | 20 | ENSMUSG00000014361 | Mertk    | 19 |
| ENSMUSG00000097303 | 3110083C13Rik | 20 | ENSMUSG00000038503 | Mesd     | 20 |
| ENSMUSG00000073590 | 3222401L13Rik | 1  | ENSMUSG00000051855 | Mest     | 20 |
| ENSMUSG00000033731 | 3300002A11Rik | 14 | ENSMUSG00000009376 | Met      | 16 |
| ENSMUSG00000063364 | 3300002I08Rik | 20 | ENSMUSG00000005813 | Metap1   | 20 |
| ENSMUSG00000071540 | 3425401B19Rik | 13 | ENSMUSG00000041921 | Metap1d  | 20 |
| ENSMUSG0000089759  | 3632454L22Rik | 3  | ENSMUSG00000036112 | Metap2   | 19 |
| ENSMUSG00000033111 | 3830406C13Rik | 20 | ENSMUSG00000002274 | Metrn    | 20 |
| ENSMUSG00000071181 | 3830408C21Rik | 20 | ENSMUSG00000039208 | Metrn1   | 20 |
| ENSMUSG00000106485 | 3830422I06Rik | 9  | ENSMUSG00000006732 | Mettl1   | 20 |
| ENSMUSG00000064202 | 4430402I18Rik | 20 | ENSMUSG00000040113 | Mettl11b | 20 |
| ENSMUSG00000042579 | 4632404H12Rik | 20 | ENSMUSG00000028114 | Mettl14  | 20 |
| ENSMUSG00000097561 | 4632411P08Rik | 20 | ENSMUSG00000057234 | Mettl15  | 20 |
| ENSMUSG00000048106 | 4632415L05Rik | 3  | ENSMUSG00000010554 | Mettl16  | 20 |
| ENSMUSG00000111605 | 4632418H02Rik | 20 | ENSMUSG00000004561 | Mettl17  | 20 |
| ENSMUSG00000074024 | 4632427E13Rik | 20 | ENSMUSG00000041396 | Mettl18  | 20 |
| ENSMUSG00000097184 | 4632428C04Rik | 8  | ENSMUSG00000020691 | Mettl2   | 9  |
| ENSMUSG00000105597 | 4633401B06Rik | 20 | ENSMUSG00000025956 | Mettl21a | 20 |
| ENSMUSG00000097004 | 4731419I09Rik | 20 | ENSMUSG00000039345 | Mettl22  | 20 |
| ENSMUSG0000086943  | 4732414G09Rik | 20 | ENSMUSG00000090266 | Mettl23  | 12 |
| ENSMUSG00000107402 | 4732416N19Rik | 20 | ENSMUSG00000045555 | Mettl24  | 20 |
| ENSMUSG00000090031 | 4732440D04Rik | 20 | ENSMUSG00000036009 | Mettl25  | 20 |
| ENSMUSG00000097762 | 4732463B04Rik | 1  | ENSMUSG00000025731 | Mettl26  | 9  |
| ENSMUSG00000053714 | 4732471J01Rik | 20 | ENSMUSG00000040557 | Mettl27  | 20 |
| ENSMUSG00000097350 | 4732491K20Rik | 17 | ENSMUSG00000022160 | Mettl3   | 1  |
| ENSMUSG00000108456 | 4732496C06Rik | 10 | ENSMUSG00000055660 | Mettl4   | 9  |
| ENSMUSG00000118132 | 4833408A19Rik | 20 | ENSMUSG00000051730 | Mettl5   | 20 |
| ENSMUSG00000109089 | 4833411C07Rik | 20 | ENSMUSG00000085735 | Mettl5os | 9  |
| ENSMUSG00000116298 | 4833412C15Rik | 20 | ENSMUSG00000021891 | Mettl6   | 20 |
| ENSMUSG00000104018 | 4833412K13Rik | 20 | ENSMUSG00000054619 | Mettl7a1 | 1  |
| ENSMUSG00000104950 | 4833413G10Rik | 3  | ENSMUSG00000041975 | Mettl8   | 20 |
| ENSMUSG00000115936 | 4833415N18Rik | 9  | ENSMUSG00000030876 | Mettl9   | 9  |
| ENSMUSG0000086015  | 4833417C18Rik | 20 | ENSMUSG00000074480 | Mex3a    | 20 |
| ENSMUSG0000085287  | 4833418N02Rik | 20 | ENSMUSG00000057706 | Mex3b    | 9  |

|                    |               |    |                    |         |    |
|--------------------|---------------|----|--------------------|---------|----|
| ENSMUSG0000062822  | 4833420G17Rik | 20 | ENSMUSG00000037253 | Mex3c   | 20 |
| ENSMUSG00000103996 | 4833421G17Rik | 20 | ENSMUSG00000048696 | Mex3d   | 12 |
| ENSMUSG00000108519 | 4833421K07Rik | 9  | ENSMUSG00000068479 | Mfap1a  | 20 |
| ENSMUSG00000074782 | 4833422C13Rik | 5  | ENSMUSG00000048222 | Mfap1b  | 20 |
| ENSMUSG00000097619 | 4833422M21Rik | 20 | ENSMUSG00000060572 | Mfap2   | 20 |
| ENSMUSG00000118087 | 4833438C02Rik | 20 | ENSMUSG00000020522 | Mfap3   | 20 |
| ENSMUSG00000025871 | 4833439L19Rik | 20 | ENSMUSG00000031647 | Mfap3l  | 20 |
| ENSMUSG00000103103 | 4833445I07Rik | 20 | ENSMUSG00000042436 | Mfap4   | 20 |
| ENSMUSG00000097626 | 4921504A21Rik | 3  | ENSMUSG00000026150 | Mff     | 20 |
| ENSMUSG00000029828 | 4921507P07Rik | 20 | ENSMUSG00000030605 | Mfge8   | 3  |
| ENSMUSG00000036934 | 4921524J17Rik | 20 | ENSMUSG00000070056 | Mfhas1  | 19 |
| ENSMUSG00000113211 | 4921525O09Rik | 20 | ENSMUSG00000027668 | Mfn1    | 9  |
| ENSMUSG00000085704 | 4921531C22Rik | 20 | ENSMUSG00000029020 | Mfn2    | 20 |
| ENSMUSG00000020434 | 4921536K21Rik | 1  | ENSMUSG00000018169 | Mfng    | 20 |
| ENSMUSG00000027309 | 4930402H24Rik | 15 | ENSMUSG00000034739 | Mfrp    | 13 |
| ENSMUSG00000115639 | 4930404K13Rik | 9  | ENSMUSG00000027775 | Mfsd1   | 1  |
| ENSMUSG00000086638 | 4930405A21Rik | 20 | ENSMUSG00000001082 | Mfsd10  | 20 |
| ENSMUSG00000090565 | 4930405O22Rik | 20 | ENSMUSG00000020818 | Mfsd11  | 20 |
| ENSMUSG00000085558 | 4930412C18Rik | 20 | ENSMUSG00000034854 | Mfsd12  | 20 |
| ENSMUSG00000110289 | 4930412F12Rik | 20 | ENSMUSG00000025227 | Mfsd13a | 9  |
| ENSMUSG00000115526 | 4930413F20Rik | 20 | ENSMUSG00000089911 | Mfsd14a | 20 |
| ENSMUSG00000108129 | 4930417O13Rik | 20 | ENSMUSG00000038212 | Mfsd14b | 12 |
| ENSMUSG00000116885 | 4930420G21Rik | 20 | ENSMUSG00000028655 | Mfsd2a  | 20 |
| ENSMUSG00000043168 | 4930426D05Rik | 20 | ENSMUSG00000037336 | Mfsd2b  | 20 |
| ENSMUSG00000097323 | 4930426I24Rik | 20 | ENSMUSG00000019080 | Mfsd3   | 20 |
| ENSMUSG00000026736 | 4930426L09Rik | 20 | ENSMUSG00000059149 | Mfsd4a  | 19 |
| ENSMUSG00000086918 | 4930429F24Rik | 20 | ENSMUSG00000038522 | Mfsd4b1 | 20 |
| ENSMUSG00000046567 | 4930430F08Rik | 20 | ENSMUSG00000096687 | Mfsd4b4 | 20 |
| ENSMUSG00000109147 | 4930431P19Rik | 20 | ENSMUSG00000045665 | Mfsd5   | 15 |
| ENSMUSG00000097007 | 4930432B10Rik | 20 | ENSMUSG00000041439 | Mfsd6   | 3  |
| ENSMUSG00000008129 | 4930432K21Rik | 20 | ENSMUSG00000029490 | Mfsd7a  | 20 |
| ENSMUSG00000067795 | 4930444P10Rik | 20 | ENSMUSG00000041945 | Mfsd9   | 1  |
| ENSMUSG00000021098 | 4930447C04Rik | 20 | ENSMUSG00000033943 | Mga     | 7  |
| ENSMUSG00000113591 | 4930447K03Rik | 20 | ENSMUSG00000037161 | Mgarp   | 18 |
| ENSMUSG00000087674 | 4930447M23Rik | 20 | ENSMUSG00000020346 | Mgat1   | 18 |
| ENSMUSG00000106583 | 4930447N08Rik | 9  | ENSMUSG00000043998 | Mgat2   | 20 |
| ENSMUSG00000022543 | 4930451G09Rik | 20 | ENSMUSG00000042428 | Mgat3   | 19 |
| ENSMUSG00000021747 | 4930452B06Rik | 6  | ENSMUSG00000026110 | Mgat4a  | 3  |
| ENSMUSG00000059920 | 4930453N24Rik | 20 | ENSMUSG00000036620 | Mgat4b  | 9  |
| ENSMUSG00000102985 | 4930456G14Rik | 20 | ENSMUSG00000019888 | Mgat4c  | 1  |
| ENSMUSG00000087611 | 4930458D05Rik | 20 | ENSMUSG00000036155 | Mgat5   | 18 |
| ENSMUSG00000112332 | 4930466K18Rik | 20 | ENSMUSG00000043857 | Mgat5b  | 9  |
| ENSMUSG00000112484 | 4930473O22Rik | 3  | ENSMUSG00000033174 | Mgll    | 20 |
| ENSMUSG00000104999 | 4930477O15Rik | 3  | ENSMUSG00000027424 | Mgme1   | 20 |
| ENSMUSG00000085238 | 4930479D17Rik | 20 | ENSMUSG00000054612 | Mgmt    | 20 |
| ENSMUSG00000107567 | 4930480K02Rik | 20 | ENSMUSG00000030218 | Mgp     | 1  |
| ENSMUSG00000086938 | 4930481A15Rik | 20 | ENSMUSG00000022517 | Mgrn1   | 20 |
| ENSMUSG00000085956 | 4930481B07Rik | 20 | ENSMUSG00000008540 | Mgst1   | 20 |
| ENSMUSG00000097520 | 4930488L21Rik | 1  | ENSMUSG00000026688 | Mgst3   | 9  |
| ENSMUSG00000097592 | 4930500F10Rik | 20 | ENSMUSG00000097652 | Mhrt    | 1  |
| ENSMUSG00000044906 | 4930503L19Rik | 20 | ENSMUSG00000021000 | Mia2    | 20 |
| ENSMUSG00000040919 | 4930505A04Rik | 20 | ENSMUSG00000056050 | Mia3    | 3  |
| ENSMUSG00000087478 | 4930506C21Rik | 20 | ENSMUSG00000097767 | Miat    | 19 |
| ENSMUSG00000097129 | 4930507D05Rik | 20 | ENSMUSG00000024294 | Mib1    | 7  |
| ENSMUSG00000096959 | 4930509G22Rik | 4  | ENSMUSG00000029060 | Mib2    | 3  |

|                    |               |    |                    |             |    |
|--------------------|---------------|----|--------------------|-------------|----|
| ENSMUSG00000105659 | 4930509H03Rik | 12 | ENSMUSG00000019823 | Mical1      | 9  |
| ENSMUSG00000086607 | 4930511M06Rik | 20 | ENSMUSG00000038244 | Mical2      | 5  |
| ENSMUSG00000020992 | 4930512B01Rik | 20 | ENSMUSG00000051586 | Mical3      | 20 |
| ENSMUSG00000074136 | 4930513N10Rik | 20 | ENSMUSG00000033039 | Micall1     | 16 |
| ENSMUSG00000111246 | 4930517E14Rik | 20 | ENSMUSG00000036718 | Micall2     | 18 |
| ENSMUSG00000074629 | 4930518I15Rik | 20 | ENSMUSG00000050608 | Micos10     | 19 |
| ENSMUSG00000031325 | 4930519F16Rik | 20 | ENSMUSG00000049760 | Micos13     | 3  |
| ENSMUSG00000114953 | 4930519K11Rik | 13 | ENSMUSG00000020111 | Micu1       | 6  |
| ENSMUSG00000074039 | 4930520O04Rik | 20 | ENSMUSG00000021973 | Micu2       | 20 |
| ENSMUSG00000072762 | 4930522L14Rik | 20 | ENSMUSG00000039478 | Micu3       | 3  |
| ENSMUSG00000090394 | 4930523C07Rik | 20 | ENSMUSG00000035299 | Mid1        | 20 |
| ENSMUSG00000090207 | 4930524O07Rik | 20 | ENSMUSG00000095134 | Mid1-ps1    | 20 |
| ENSMUSG00000097276 | 4930525G20Rik | 2  | ENSMUSG00000008035 | Mid1ip1     | 18 |
| ENSMUSG00000085521 | 4930526A20Rik | 20 | ENSMUSG00000000266 | Mid2        | 3  |
| ENSMUSG00000097502 | 4930528D03Rik | 20 | ENSMUSG00000035621 | Midn        | 10 |
| ENSMUSG00000097261 | 4930532G15Rik | 20 | ENSMUSG00000022412 | Mief1       | 20 |
| ENSMUSG00000048905 | 4930539E08Rik | 20 | ENSMUSG00000018599 | Mief2       | 20 |
| ENSMUSG00000097032 | 4930539J05Rik | 20 | ENSMUSG00000002580 | Mien1       | 12 |
| ENSMUSG00000097890 | 4930547M16Rik | 20 | ENSMUSG00000028522 | Mier1       | 12 |
| ENSMUSG00000111165 | 4930553I21Rik | 20 | ENSMUSG00000042570 | Mier2       | 20 |
| ENSMUSG00000106791 | 4930553P18Rik | 20 | ENSMUSG00000032727 | Mier3       | 2  |
| ENSMUSG00000114190 | 4930556H04Rik | 20 | ENSMUSG00000033307 | Mif         | 3  |
| ENSMUSG00000034493 | 4930556J24Rik | 20 | ENSMUSG00000020743 | Mif4gd      | 9  |
| ENSMUSG00000096971 | 4930556M19Rik | 13 | ENSMUSG00000054942 | Miga1       | 10 |
| ENSMUSG00000086277 | 4930558K02Rik | 9  | ENSMUSG00000026858 | Miga2       | 18 |
| ENSMUSG00000053574 | 4930563E22Rik | 13 | ENSMUSG00000029022 | Miip        | 20 |
| ENSMUSG00000102408 | 4930568G15Rik | 18 | ENSMUSG00000040987 | Mill2       | 20 |
| ENSMUSG00000085084 | 4930570G19Rik | 20 | ENSMUSG00000039313 | Minar1      | 18 |
| ENSMUSG00000115725 | 4930572G02Rik | 20 | ENSMUSG00000050875 | Minar2      | 20 |
| ENSMUSG00000097587 | 4930578M01Rik | 9  | ENSMUSG00000038712 | Mindy1      | 9  |
| ENSMUSG00000027811 | 4930579G24Rik | 20 | ENSMUSG00000042444 | Mindy2      | 18 |
| ENSMUSG00000051074 | 4930579K19Rik | 20 | ENSMUSG00000026767 | Mindy3      | 20 |
| ENSMUSG00000070315 | 4930581F22Rik | 20 | ENSMUSG00000038022 | Mindy4      | 20 |
| ENSMUSG00000111540 | 4930584E12Rik | 18 | ENSMUSG00000101860 | Mindy4b-ps  | 20 |
| ENSMUSG00000117792 | 4930588A03Rik | 18 | ENSMUSG00000020827 | Mink1       | 9  |
| ENSMUSG00000034063 | 4930590J08Rik | 20 | ENSMUSG00000024896 | Minpp1      | 20 |
| ENSMUSG00000097725 | 4930593A02Rik | 20 | ENSMUSG00000042447 | Mios        | 16 |
| ENSMUSG00000103948 | 4930594C11Rik | 20 | ENSMUSG00000021993 | Mipep       | 20 |
| ENSMUSG00000075463 | 4930594M22Rik | 20 | ENSMUSG00000047022 | Mipol1      | 20 |
| ENSMUSG00000104900 | 4930596I21Rik | 20 | ENSMUSG00000093011 | Mir100      | 20 |
| ENSMUSG00000104964 | 4930597L12Rik | 20 | ENSMUSG00000074415 | Mir100hg    | 9  |
| ENSMUSG00000109160 | 4930598N05Rik | 20 | ENSMUSG00000065563 | Mir103-2    | 20 |
| ENSMUSG00000073144 | 4930599N23Rik | 20 | ENSMUSG00000080575 | Mir1190     | 7  |
| ENSMUSG00000031938 | 4931406C07Rik | 13 | ENSMUSG00000105379 | Mir1191b    | 9  |
| ENSMUSG00000066571 | 4931406P16Rik | 18 | ENSMUSG00000080626 | Mir1192     | 20 |
| ENSMUSG00000022179 | 4931414P19Rik | 20 | ENSMUSG00000080411 | Mir1193     | 20 |
| ENSMUSG00000054910 | 4931415C17Rik | 20 | ENSMUSG00000080687 | Mir1197     | 20 |
| ENSMUSG00000026774 | 4931423N10Rik | 20 | ENSMUSG00000100252 | Mir124-2hg  | 18 |
| ENSMUSG00000014837 | 4931428F04Rik | 1  | ENSMUSG00000097545 | Mir124a-1hg | 3  |
| ENSMUSG00000078157 | 4931440F15Rik | 20 | ENSMUSG00000093122 | Mir1264     | 20 |
| ENSMUSG00000074580 | 4931440P22Rik | 20 | ENSMUSG00000065520 | Mir128-1    | 20 |
| ENSMUSG00000075070 | 4932412D23Rik | 9  | ENSMUSG00000065441 | Mir128-2    | 20 |
| ENSMUSG00000105881 | 4932422M17Rik | 20 | ENSMUSG00000065537 | Mir132      | 20 |
| ENSMUSG00000037270 | 4932438A13Rik | 2  | ENSMUSG00000065538 | Mir153      | 20 |
| ENSMUSG00000039851 | 4932438H23Rik | 13 | ENSMUSG00000065448 | Mir154      | 20 |

|                    |               |    |                    |           |    |
|--------------------|---------------|----|--------------------|-----------|----|
| ENSMUSG0000097216  | 4932441J04Rik | 20 | ENSMUSG00000089726 | Mir17hg   | 20 |
| ENSMUSG0000086796  | 4932702P03Rik | 20 | ENSMUSG00000065431 | Mir186    | 20 |
| ENSMUSG00000103321 | 4933403L11Rik | 20 | ENSMUSG00000084592 | Mir1898   | 20 |
| ENSMUSG00000097908 | 4933404O12Rik | 20 | ENSMUSG00000076379 | Mir190a   | 1  |
| ENSMUSG00000084234 | 4933405O20Rik | 19 | ENSMUSG00000093039 | Mir1912   | 20 |
| ENSMUSG00000110427 | 4933406B17Rik | 20 | ENSMUSG00000089214 | Mir1931   | 20 |
| ENSMUSG00000097494 | 4933406C10Rik | 20 | ENSMUSG00000088552 | Mir1957a  | 20 |
| ENSMUSG00000087475 | 4933406I18Rik | 20 | ENSMUSG00000088248 | Mir1969   | 20 |
| ENSMUSG00000069713 | 4933406P04Rik | 20 | ENSMUSG00000088148 | Mir1983   | 20 |
| ENSMUSG00000087396 | 4933407K13Rik | 20 | ENSMUSG00000080662 | Mir1b     | 20 |
| ENSMUSG00000026224 | 4933407L21Rik | 20 | ENSMUSG00000065507 | Mir204    | 13 |
| ENSMUSG00000049357 | 4933408B17Rik | 19 | ENSMUSG00000065485 | Mir219a-2 | 20 |
| ENSMUSG00000090369 | 4933411K16Rik | 1  | ENSMUSG00000085148 | Mir22hg   | 20 |
| ENSMUSG00000112627 | 4933412E12Rik | 18 | ENSMUSG00000065513 | Mir26a-1  | 20 |
| ENSMUSG00000113960 | 4933412O06Rik | 20 | ENSMUSG00000104794 | Mir28c    | 20 |
| ENSMUSG00000103006 | 4933417C20Rik | 1  | ENSMUSG00000065610 | Mir29a    | 20 |
| ENSMUSG00000085037 | 4933421O10Rik | 20 | ENSMUSG00000065604 | Mir29b-1  | 20 |
| ENSMUSG00000020807 | 4933427D14Rik | 20 | ENSMUSG00000098807 | Mir300    | 20 |
| ENSMUSG00000086697 | 4933427G23Rik | 9  | ENSMUSG00000093080 | Mir3060   | 20 |
| ENSMUSG00000097786 | 4933429H19Rik | 20 | ENSMUSG00000092751 | Mir3080   | 20 |
| ENSMUSG00000115008 | 4933429O19Rik | 13 | ENSMUSG00000092988 | Mir3093   | 20 |
| ENSMUSG00000107172 | 4933430H06Rik | 9  | ENSMUSG00000092815 | Mir3099   | 9  |
| ENSMUSG00000058046 | 4933430I17Rik | 13 | ENSMUSG00000065617 | Mir323    | 20 |
| ENSMUSG00000086968 | 4933431E20Rik | 1  | ENSMUSG00000065425 | Mir325    | 20 |
| ENSMUSG00000103715 | 4933431K14Rik | 20 | ENSMUSG00000065571 | Mir326    | 20 |
| ENSMUSG00000097021 | 4933433G15Rik | 20 | ENSMUSG00000065577 | Mir329    | 20 |
| ENSMUSG00000114362 | 4933433G19Rik | 20 | ENSMUSG00000065465 | Mir33     | 1  |
| ENSMUSG00000027942 | 4933434E20Rik | 20 | ENSMUSG00000065600 | Mir338    | 20 |
| ENSMUSG00000072893 | 4933439C10Rik | 20 | ENSMUSG00000065417 | Mir340    | 20 |
| ENSMUSG00000042087 | 4933440N22Rik | 20 | ENSMUSG00000065436 | Mir342    | 10 |
| ENSMUSG00000073147 | 5031425E22Rik | 20 | ENSMUSG00000065568 | Mir344    | 12 |
| ENSMUSG00000097885 | 5031434O11Rik | 20 | ENSMUSG00000093187 | Mir344-2  | 9  |
| ENSMUSG00000036046 | 5031439G07Rik | 16 | ENSMUSG00000092921 | Mir344b   | 12 |
| ENSMUSG00000102185 | 5033404E19Rik | 20 | ENSMUSG00000077107 | Mir344c   | 20 |
| ENSMUSG00000097251 | 5033417F24Rik | 19 | ENSMUSG00000093108 | Mir344f   | 20 |
| ENSMUSG00000112276 | 5033421B08Rik | 20 | ENSMUSG00000095154 | Mir344i   | 20 |
| ENSMUSG00000038152 | 5033430I15Rik | 6  | ENSMUSG00000065481 | Mir346    | 20 |
| ENSMUSG00000104030 | 5330406M23Rik | 20 | ENSMUSG00000098896 | Mir3473g  | 20 |
| ENSMUSG00000113927 | 5330409N07Rik | 20 | ENSMUSG00000076269 | Mir374b   | 17 |
| ENSMUSG00000086822 | 5330413P13Rik | 8  | ENSMUSG00000105178 | Mir376a   | 20 |
| ENSMUSG00000054944 | 5330416C01Rik | 18 | ENSMUSG00000076006 | Mir376c   | 20 |
| ENSMUSG00000040412 | 5330417C22Rik | 9  | ENSMUSG00000065498 | Mir379    | 20 |
| ENSMUSG00000114282 | 5330431K02Rik | 2  | ENSMUSG00000104582 | Mir380    | 20 |
| ENSMUSG00000087620 | 5330434G04Rik | 19 | ENSMUSG00000098838 | Mir381    | 20 |
| ENSMUSG00000106855 | 5330437M03Rik | 9  | ENSMUSG00000065457 | Mir383    | 18 |
| ENSMUSG00000052291 | 5330438D12Rik | 20 | ENSMUSG00000065499 | Mir384    | 20 |
| ENSMUSG00000089708 | 5330439A09Rik | 20 | ENSMUSG00000106199 | Mir3967   | 20 |
| ENSMUSG00000097827 | 5330439K02Rik | 20 | ENSMUSG00000093100 | Mir3971   | 20 |
| ENSMUSG00000097699 | 5430400D12Rik | 20 | ENSMUSG00000105849 | Mir409    | 20 |
| ENSMUSG00000085776 | 5430402O13Rik | 10 | ENSMUSG00000065477 | Mir411    | 20 |
| ENSMUSG00000072763 | 5430403G16Rik | 20 | ENSMUSG00000065509 | Mir421    | 20 |
| ENSMUSG00000085741 | 5430405H02Rik | 20 | ENSMUSG00000065450 | Mir448    | 20 |
| ENSMUSG00000114419 | 5430414B19Rik | 20 | ENSMUSG00000077925 | Mir453    | 9  |
| ENSMUSG00000097772 | 5430416N02Rik | 20 | ENSMUSG00000092990 | Mir466q   | 20 |
| ENSMUSG00000102808 | 5430420F09Rik | 20 | ENSMUSG00000096624 | Mir467a-1 | 20 |

|                     |               |    |                    |            |    |
|---------------------|---------------|----|--------------------|------------|----|
| ENSMUSG0000025058   | 5430427O19Rik | 20 | ENSMUSG00000076219 | Mir487b    | 20 |
| ENSMUSG00000108780  | 5430434F05Rik | 20 | ENSMUSG00000070103 | Mir488     | 20 |
| ENSMUSG00000087174  | 5530601H04Rik | 20 | ENSMUSG00000070077 | Mir491     | 20 |
| ENSMUSG00000087424  | 5730405O15Rik | 20 | ENSMUSG00000070141 | Mir494     | 20 |
| ENSMUSG00000104343  | 5730408A14Rik | 3  | ENSMUSG00000070105 | Mir495     | 9  |
| ENSMUSG00000073755  | 5730409E04Rik | 20 | ENSMUSG00000070136 | Mir496a    | 20 |
| ENSMUSG00000116506  | 5730414N17Rik | 18 | ENSMUSG00000092981 | Mir5125    | 20 |
| ENSMUSG00000057181  | 5730455P16Rik | 19 | ENSMUSG00000076063 | Mir539     | 20 |
| ENSMUSG00000029089  | 5730480H06Rik | 9  | ENSMUSG00000076052 | Mir541     | 20 |
| ENSMUSG00000107468  | 5730507A11Rik | 20 | ENSMUSG00000076241 | Mir543     | 20 |
| ENSMUSG00000073197  | 5730507C01Rik | 20 | ENSMUSG00000077001 | Mir544     | 20 |
| ENSMUSG00000116145  | 5730521K06Rik | 20 | ENSMUSG00000093757 | Mir5623    | 20 |
| ENSMUSG00000032985  | 5730522E02Rik | 18 | ENSMUSG00000098973 | Mir6236    | 18 |
| ENSMUSG00000110148  | 5830408C22Rik | 20 | ENSMUSG00000098734 | Mir6335    | 20 |
| ENSMUSG00000106219  | 5830416I19Rik | 20 | ENSMUSG00000098660 | Mir6336    | 3  |
| ENSMUSG00000078684  | 5830417I10Rik | 20 | ENSMUSG00000099141 | Mir6352    | 20 |
| ENSMUSG00000084803  | 5830444B04Rik | 20 | ENSMUSG00000099045 | Mir6374    | 20 |
| ENSMUSG00000102744  | 5830444F18Rik | 20 | ENSMUSG00000077980 | Mir654     | 20 |
| ENSMUSG00000115007  | 5830448L01Rik | 9  | ENSMUSG00000076272 | Mir666     | 20 |
| ENSMUSG00000052658  | 5830454E08Rik | 20 | ENSMUSG00000076396 | Mir667     | 1  |
| ENSMUSG00000110972  | 5830462O15Rik | 20 | ENSMUSG00000075020 | Mir670hg   | 20 |
| ENSMUSG00000104830  | 5830487J09Rik | 20 | ENSMUSG00000076145 | Mir679     | 20 |
| ENSMUSG00000103477  | 5930409G06Rik | 9  | ENSMUSG00000076064 | Mir690     | 20 |
| ENSMUSG00000107201  | 5930420M18Rik | 20 | ENSMUSG00000099267 | Mir6955    | 20 |
| ENSMUSG00000106951  | 5930430L01Rik | 12 | ENSMUSG00000065434 | Mir7-1     | 20 |
| ENSMUSG00000105326  | 6030400A10Rik | 20 | ENSMUSG00000104914 | Mir7061    | 20 |
| ENSMUSG00000100301  | 6030407O03Rik | 20 | ENSMUSG00000076143 | Mir708     | 20 |
| ENSMUSG00000097760  | 6030442K20Rik | 20 | ENSMUSG00000076144 | Mir709     | 20 |
| ENSMUSG00000097207  | 6030443J06Rik | 1  | ENSMUSG00000098247 | Mir7220    | 20 |
| ENSMUSG00000022195  | 6030458C11Rik | 20 | ENSMUSG00000098299 | Mir7224    | 9  |
| ENSMUSG00000097577  | 6230400D17Rik | 20 | ENSMUSG00000076460 | Mir744     | 20 |
| ENSMUSG00000018451  | 6330403K07Rik | 20 | ENSMUSG00000076459 | Mir758     | 20 |
| ENSMUSG00000075585  | 6330403L08Rik | 9  | ENSMUSG00000076458 | Mir764     | 20 |
| ENSMUSG000000116733 | 6330408M09Rik | 20 | ENSMUSG00000098714 | Mir7663    | 20 |
| ENSMUSG00000009551  | 6330409D20Rik | 20 | ENSMUSG00000099320 | Mir7664    | 20 |
| ENSMUSG00000110067  | 6330411D24Rik | 9  | ENSMUSG00000098397 | Mir7669    | 20 |
| ENSMUSG00000108077  | 6330415B21Rik | 3  | ENSMUSG00000098286 | Mir8091    | 20 |
| ENSMUSG00000117322  | 6330415G19Rik | 20 | ENSMUSG00000078057 | Mir873a    | 20 |
| ENSMUSG00000085227  | 6330418K02Rik | 20 | ENSMUSG00000077851 | Mir876     | 20 |
| ENSMUSG00000107414  | 6330419E04Rik | 20 | ENSMUSG00000106493 | Mir9-1     | 20 |
| ENSMUSG00000045327  | 6330549D23Rik | 20 | ENSMUSG00000097023 | Mir9-3hg   | 20 |
| ENSMUSG00000093424  | 6330562C20Rik | 20 | ENSMUSG00000065530 | Mir99a     | 20 |
| ENSMUSG00000053545  | 6430503K07Rik | 20 | ENSMUSG00000090386 | Mir99ahg   | 2  |
| ENSMUSG00000102555  | 6430511E19Rik | 20 | ENSMUSG00000097391 | Mirg       | 1  |
| ENSMUSG00000031824  | 6430548M08Rik | 18 | ENSMUSG00000092770 | Mirlet7a-2 | 20 |
| ENSMUSG00000074646  | 6430550D23Rik | 20 | ENSMUSG00000065557 | Mirlet7c-1 | 20 |
| ENSMUSG00000037977  | 6430571L13Rik | 4  | ENSMUSG00000105758 | Mirlet7e   | 20 |
| ENSMUSG00000102545  | 6430573P05Rik | 9  | ENSMUSG00000065440 | Mirlet7g   | 19 |
| ENSMUSG00000108228  | 6430584L05Rik | 16 | ENSMUSG00000097636 | Mirt1      | 20 |
| ENSMUSG00000110127  | 6430710M23Rik | 20 | ENSMUSG00000040599 | Mis12      | 18 |
| ENSMUSG00000091947  | 6530401F13Rik | 20 | ENSMUSG00000022978 | Mis18a     | 3  |
| ENSMUSG00000079499  | 6530402F18Rik | 12 | ENSMUSG00000047534 | Mis18bp1   | 20 |
| ENSMUSG00000098097  | 6530403H02Rik | 19 | ENSMUSG00000035852 | Misp       | 20 |
| ENSMUSG00000043340  | 6530409C15Rik | 20 | ENSMUSG00000026088 | Mitd1      | 1  |
| ENSMUSG00000097375  | 6720427I07Rik | 3  | ENSMUSG00000035158 | Mitf       | 13 |

|                    |               |    |                    |           |    |
|--------------------|---------------|----|--------------------|-----------|----|
| ENSMUSG00000103432 | 6720464F23Rik | 20 | ENSMUSG00000031004 | Mki67     | 18 |
| ENSMUSG00000117655 | 6720468P15Rik | 9  | ENSMUSG00000027274 | Mkks      | 20 |
| ENSMUSG00000108507 | 6720469O03Rik | 20 | ENSMUSG00000025609 | Mkln1     | 12 |
| ENSMUSG00000107009 | 6720475M21Rik | 20 | ENSMUSG00000086212 | Mkln1os   | 20 |
| ENSMUSG00000106553 | 6720482G16Rik | 20 | ENSMUSG00000028708 | Mknk1     | 20 |
| ENSMUSG00000097934 | 6720483E21Rik | 20 | ENSMUSG00000020190 | Mknk2     | 20 |
| ENSMUSG00000072066 | 6720489N17Rik | 1  | ENSMUSG00000029922 | Mkrn1     | 9  |
| ENSMUSG00000103706 | 6820402A03Rik | 2  | ENSMUSG00000082389 | Mkrn1-ps1 | 20 |
| ENSMUSG00000032680 | 6820408C15Rik | 20 | ENSMUSG00000000439 | Mkrn2     | 20 |
| ENSMUSG00000071796 | 6820431F20Rik | 20 | ENSMUSG00000070527 | Mkrn3     | 20 |
| ENSMUSG00000116888 | 7120432I05Rik | 3  | ENSMUSG00000034121 | Mks1      | 20 |
| ENSMUSG00000098758 | 7630403G23Rik | 1  | ENSMUSG00000061013 | Mkx       | 9  |
| ENSMUSG00000103563 | 8030445P17Rik | 20 | ENSMUSG00000035805 | Mlc1      | 20 |
| ENSMUSG00000085058 | 8030453O22Rik | 9  | ENSMUSG00000048578 | Mlec      | 18 |
| ENSMUSG00000117768 | 8030456M14Rik | 20 | ENSMUSG00000048416 | Mlf1      | 13 |
| ENSMUSG00000105136 | 8030487O14Rik | 20 | ENSMUSG00000030120 | Mlf2      | 2  |
| ENSMUSG00000113432 | 8430406P12Rik | 20 | ENSMUSG00000032498 | Mlh1      | 20 |
| ENSMUSG00000085743 | 8430419K02Rik | 20 | ENSMUSG00000021245 | Mlh3      | 6  |
| ENSMUSG00000105095 | 8430422M14Rik | 9  | ENSMUSG00000032355 | Mlip      | 1  |
| ENSMUSG00000115970 | 8430426J06Rik | 20 | ENSMUSG00000012519 | Mlkl      | 20 |
| ENSMUSG00000034587 | 8430429K09Rik | 20 | ENSMUSG00000024212 | Mllt1     | 9  |
| ENSMUSG00000041878 | 8430432A02Rik | 20 | ENSMUSG00000026743 | Mllt10    | 9  |
| ENSMUSG00000116953 | 9030025P20Rik | 20 | ENSMUSG00000053192 | Mllt11    | 1  |
| ENSMUSG00000097343 | 9030407P20Rik | 20 | ENSMUSG00000028496 | Mllt3     | 20 |
| ENSMUSG00000045008 | 9030612E09Rik | 3  | ENSMUSG00000038437 | Mllt6     | 9  |
| ENSMUSG00000073158 | 9030624G23Rik | 20 | ENSMUSG00000026303 | Mlph      | 20 |
| ENSMUSG00000115837 | 9130002K18Rik | 13 | ENSMUSG00000024142 | Mlst8     | 6  |
| ENSMUSG00000030823 | 9130019O22Rik | 20 | ENSMUSG00000017801 | Mlx       | 12 |
| ENSMUSG00000073067 | 9130019P16Rik | 20 | ENSMUSG00000038342 | Mlxip     | 20 |
| ENSMUSG00000062944 | 9130023H24Rik | 20 | ENSMUSG00000005373 | Mlxipl    | 20 |
| ENSMUSG00000087022 | 9130024F11Rik | 20 | ENSMUSG00000074064 | Mlycd     | 20 |
| ENSMUSG00000097386 | 9130213A22Rik | 20 | ENSMUSG00000097191 | Mm2pr     | 9  |
| ENSMUSG00000090330 | 9130221H12Rik | 20 | ENSMUSG00000037022 | Mmaa      | 20 |
| ENSMUSG00000092626 | 9130230N09Rik | 9  | ENSMUSG00000029575 | Mmab      | 20 |
| ENSMUSG00000072982 | 9230009I02Rik | 1  | ENSMUSG00000028690 | Mmachc    | 20 |
| ENSMUSG00000070461 | 9230112E08Rik | 20 | ENSMUSG00000026766 | Mmadhc    | 20 |
| ENSMUSG00000111761 | 9230112J17Rik | 1  | ENSMUSG00000003948 | Mmd       | 6  |
| ENSMUSG00000097145 | 9230114K14Rik | 20 | ENSMUSG00000039533 | Mmd2      | 20 |
| ENSMUSG00000097403 | 9230116N13Rik | 20 | ENSMUSG00000027820 | Mme       | 9  |
| ENSMUSG00000091050 | 9330020H09Rik | 20 | ENSMUSG00000058183 | Mmel1     | 18 |
| ENSMUSG00000107879 | 9330102E08Rik | 1  | ENSMUSG00000061273 | Mmgt1     | 20 |
| ENSMUSG00000097842 | 9330104G04Rik | 20 | ENSMUSG00000048497 | Mmgt2     | 20 |
| ENSMUSG00000097098 | 9330111N05Rik | 1  | ENSMUSG00000000901 | Mmp11     | 20 |
| ENSMUSG00000118154 | 9330117O12Rik | 20 | ENSMUSG00000000957 | Mmp14     | 20 |
| ENSMUSG00000108242 | 9330118I20Rik | 20 | ENSMUSG00000031790 | Mmp15     | 18 |
| ENSMUSG00000103502 | 9330121J05Rik | 20 | ENSMUSG00000028226 | Mmp16     | 9  |
| ENSMUSG00000110249 | 9330121K16Rik | 4  | ENSMUSG00000029436 | Mmp17     | 9  |
| ENSMUSG00000097781 | 9330136K24Rik | 20 | ENSMUSG00000025355 | Mmp19     | 20 |
| ENSMUSG00000097061 | 9330151L19Rik | 3  | ENSMUSG00000031740 | Mmp2      | 9  |
| ENSMUSG00000056031 | 9330154J02Rik | 9  | ENSMUSG00000029061 | Mmp23     | 20 |
| ENSMUSG00000073154 | 9330158H04Rik | 20 | ENSMUSG00000027612 | Mmp24     | 20 |
| ENSMUSG00000004360 | 9330159F19Rik | 20 | ENSMUSG00000020682 | Mmp28     | 20 |
| ENSMUSG00000097177 | 9330159M07Rik | 20 | ENSMUSG00000017737 | Mmp9      | 20 |
| ENSMUSG00000113695 | 9330159N22Rik | 20 | ENSMUSG00000041445 | Mmrn2     | 20 |
| ENSMUSG00000072809 | 9330160F10Rik | 1  | ENSMUSG00000025159 | Mms19     | 20 |

|                    |               |    |                    |             |    |
|--------------------|---------------|----|--------------------|-------------|----|
| ENSMUSG0000055271  | 9330161L09Rik | 20 | ENSMUSG0000045751  | Mms22l      | 20 |
| ENSMUSG0000086448  | 9330162012Rik | 20 | ENSMUSG0000023921  | Mmut        | 20 |
| ENSMUSG00000109536 | 9330162G02Rik | 3  | ENSMUSG0000070576  | Mn1         | 9  |
| ENSMUSG0000039133  | 9330171B17Rik | 9  | ENSMUSG0000021103  | Mnat1       | 20 |
| ENSMUSG0000097166  | 9330179D12Rik | 1  | ENSMUSG0000033752  | Mnd1        | 20 |
| ENSMUSG0000056004  | 9330182L06Rik | 20 | ENSMUSG0000090272  | Mndal       | 20 |
| ENSMUSG0000097648  | 9330185C12Rik | 20 | ENSMUSG0000032221  | Mns1        | 20 |
| ENSMUSG00000115149 | 9330188P03Rik | 18 | ENSMUSG0000000282  | Mnt         | 20 |
| ENSMUSG00000104904 | 9330198I05Rik | 20 | ENSMUSG0000096458  | Moap1       | 20 |
| ENSMUSG00000114189 | 9330199G10Rik | 20 | ENSMUSG0000043131  | Mob1a       | 20 |
| ENSMUSG00000062704 | 9430002A10Rik | 20 | ENSMUSG0000006262  | Mob1b       | 10 |
| ENSMUSG0000059939  | 9430015G10Rik | 20 | ENSMUSG00000025147 | Mob2        | 20 |
| ENSMUSG00000107709 | 9430018G01Rik | 20 | ENSMUSG00000003348 | Mob3a       | 18 |
| ENSMUSG00000054457 | 9430021M05Rik | 20 | ENSMUSG00000073910 | Mob3b       | 1  |
| ENSMUSG00000055216 | 9430025C20Rik | 20 | ENSMUSG00000028709 | Mob3c       | 20 |
| ENSMUSG00000113341 | 9430031K09Rik | 20 | ENSMUSG00000025979 | Mob4        | 20 |
| ENSMUSG00000102964 | 9430034N14Rik | 20 | ENSMUSG00000032517 | Mobp        | 16 |
| ENSMUSG00000097073 | 9430037G07Rik | 12 | ENSMUSG00000039616 | Mocos       | 20 |
| ENSMUSG00000040139 | 9430038I01Rik | 20 | ENSMUSG00000064120 | Mocs1       | 20 |
| ENSMUSG00000086155 | 9430041J12Rik | 20 | ENSMUSG00000015536 | Mocs2       | 20 |
| ENSMUSG00000102344 | 9430053O09Rik | 16 | ENSMUSG00000074576 | Mocs3       | 20 |
| ENSMUSG00000100632 | 9430060I03Rik | 20 | ENSMUSG00000076439 | Mog         | 16 |
| ENSMUSG00000108402 | 9430064I24Rik | 20 | ENSMUSG00000030036 | Mogs        | 20 |
| ENSMUSG00000097360 | 9430065F17Rik | 20 | ENSMUSG00000056458 | Mok         | 18 |
| ENSMUSG00000111088 | 9430081H08Rik | 20 | ENSMUSG00000032583 | Mon1a       | 20 |
| ENSMUSG00000106164 | 9430085M18Rik | 18 | ENSMUSG00000078908 | Mon1b       | 20 |
| ENSMUSG00000103522 | 9430087J23Rik | 20 | ENSMUSG00000034602 | Mon2        | 12 |
| ENSMUSG00000084808 | 9430091E24Rik | 20 | ENSMUSG00000034543 | Morc2a      | 20 |
| ENSMUSG00000102205 | 9430092D12Rik | 20 | ENSMUSG00000048602 | Morc2b      | 20 |
| ENSMUSG00000075405 | 9430097D07Rik | 20 | ENSMUSG00000039456 | Morc3       | 20 |
| ENSMUSG00000109997 | 9430099M06Rik | 20 | ENSMUSG00000031434 | Morc4       | 20 |
| ENSMUSG00000102267 | 9530003O04Rik | 20 | ENSMUSG00000062270 | Morf411     | 9  |
| ENSMUSG00000112150 | 9530018F02Rik | 20 | ENSMUSG00000116875 | Morf411-ps1 | 20 |
| ENSMUSG00000102369 | 9530022L04Rik | 20 | ENSMUSG00000031422 | Morf412     | 16 |
| ENSMUSG00000097462 | 9530026P05Rik | 20 | ENSMUSG00000029049 | Morn1       | 20 |
| ENSMUSG00000097726 | 9530036O11Rik | 20 | ENSMUSG00000045257 | Morn2       | 19 |
| ENSMUSG00000085982 | 9530051G07Rik | 8  | ENSMUSG00000049670 | Morn4       | 20 |
| ENSMUSG00000097858 | 9530052C20Rik | 20 | ENSMUSG00000074813 | Morrbid     | 20 |
| ENSMUSG00000096938 | 9530052E02Rik | 20 | ENSMUSG00000046096 | Mosmo       | 7  |
| ENSMUSG00000115955 | 9530056E24Rik | 20 | ENSMUSG00000023074 | Mospd1      | 20 |
| ENSMUSG00000045345 | 9530056K15Rik | 20 | ENSMUSG00000061778 | Mospd2      | 20 |
| ENSMUSG00000097736 | 9530059O14Rik | 6  | ENSMUSG00000037221 | Mospd3      | 20 |
| ENSMUSG00000108030 | 9530062K07Rik | 20 | ENSMUSG00000046487 | Mospd4      | 20 |
| ENSMUSG00000036275 | 9530068E07Rik | 1  | ENSMUSG00000002227 | Mov10       | 3  |
| ENSMUSG00000036411 | 9530077C05Rik | 20 | ENSMUSG00000020000 | Moxd1       | 20 |
| ENSMUSG00000044125 | 9530080O11Rik | 20 | ENSMUSG00000023861 | Mpc1        | 12 |
| ENSMUSG00000097006 | 9530082P21Rik | 20 | ENSMUSG00000091498 | Mpc1-ps     | 20 |
| ENSMUSG00000107742 | 9530085L11Rik | 20 | ENSMUSG00000026568 | Mpc2        | 12 |
| ENSMUSG00000108076 | 9530086O07Rik | 20 | ENSMUSG00000018761 | Mpdu1       | 2  |
| ENSMUSG00000106371 | 9530097N15Rik | 20 | ENSMUSG00000028402 | Mpdz        | 9  |
| ENSMUSG00000097825 | 9630001P10Rik | 18 | ENSMUSG00000046805 | Mpeg1       | 20 |
| ENSMUSG00000115012 | 9630009A06Rik | 20 | ENSMUSG00000020287 | Mpg         | 20 |
| ENSMUSG00000103867 | 9630010A21Rik | 20 | ENSMUSG00000030521 | Mphosph10   | 20 |
| ENSMUSG00000115529 | 9630013A20Rik | 1  | ENSMUSG00000031843 | Mphosph6    | 16 |
| ENSMUSG00000118257 | 9630014M24Rik | 20 | ENSMUSG00000079184 | Mphosph8    | 20 |



|                    |                |    |                    |          |    |
|--------------------|----------------|----|--------------------|----------|----|
| ENSMUSG00000115275 | 9630050E16Rik  | 20 | ENSMUSG00000038126 | Mphosph9 | 20 |
| ENSMUSG00000087528 | 9830144P21Rik  | 20 | ENSMUSG00000032306 | Mpi      | 6  |
| ENSMUSG00000117763 | 9830166K06Rik  | 20 | ENSMUSG00000012429 | Mplkip   | 9  |
| ENSMUSG00000044551 | 9930012K11Rik  | 19 | ENSMUSG00000003199 | Mpnd     | 20 |
| ENSMUSG00000097493 | 9930014A18Rik  | 20 | ENSMUSG00000031402 | Mpp1     | 19 |
| ENSMUSG00000115276 | 9930017N22Rik  | 20 | ENSMUSG00000017314 | Mpp2     | 18 |
| ENSMUSG00000046138 | 9930021J03Rik  | 7  | ENSMUSG00000052373 | Mpp3     | 6  |
| ENSMUSG00000111131 | 9930024M15Rik  | 12 | ENSMUSG00000079550 | Mpp4     | 20 |
| ENSMUSG00000044730 | 9930104L06Rik  | 20 | ENSMUSG00000021112 | Mpp5     | 13 |
| ENSMUSG00000069893 | 9930111J21Rik1 | 19 | ENSMUSG00000038388 | Mpp6     | 20 |
| ENSMUSG00000069892 | 9930111J21Rik2 | 20 | ENSMUSG00000057440 | Mpp7     | 19 |
| ENSMUSG00000108120 | 9930120I10Rik  | 20 | ENSMUSG00000062526 | Mppe1    | 9  |
| ENSMUSG00000110357 | A030001D20Rik  | 20 | ENSMUSG00000041708 | Mpped1   | 20 |
| ENSMUSG00000113880 | A030005L19Rik  | 20 | ENSMUSG00000016386 | Mpped2   | 9  |
| ENSMUSG00000069136 | A130006I12Rik  | 20 | ENSMUSG00000005417 | Mprip    | 9  |
| ENSMUSG00000079144 | A130010J15Rik  | 20 | ENSMUSG00000071711 | Mpst     | 20 |
| ENSMUSG00000112822 | A130012E19Rik  | 20 | ENSMUSG00000107283 | Mpv17    | 20 |
| ENSMUSG00000097944 | A130014A01Rik  | 20 | ENSMUSG00000022679 | Mpv17l   | 9  |
| ENSMUSG00000102642 | A130048G24Rik  | 20 | ENSMUSG00000026566 | Mpz11    | 20 |
| ENSMUSG00000102277 | A130050O07Rik  | 20 | ENSMUSG00000070305 | Mpz13    | 20 |
| ENSMUSG00000104291 | A130071D04Rik  | 20 | ENSMUSG00000026471 | Mr1      | 20 |
| ENSMUSG00000105891 | A230001M10Rik  | 20 | ENSMUSG00000042761 | Mrap2    | 9  |
| ENSMUSG00000087306 | A230004M16Rik  | 20 | ENSMUSG00000032470 | Mras     | 18 |
| ENSMUSG00000087612 | A230005M16Rik  | 20 | ENSMUSG00000026712 | Mrc1     | 20 |
| ENSMUSG00000068151 | A230006K03Rik  | 1  | ENSMUSG00000020695 | Mrc2     | 20 |
| ENSMUSG00000089633 | A230009B12Rik  | 1  | ENSMUSG00000031928 | Mre11a   | 20 |
| ENSMUSG00000117172 | A230051N06Rik  | 20 | ENSMUSG00000039395 | Mreg     | 18 |
| ENSMUSG00000087178 | A230056P14Rik  | 20 | ENSMUSG00000055302 | Mrfap1   | 20 |
| ENSMUSG00000109394 | A230057D06Rik  | 20 | ENSMUSG00000027569 | Mrgbp    | 20 |
| ENSMUSG00000087627 | A230059L01Rik  | 20 | ENSMUSG00000048965 | Mrgpre   | 17 |
| ENSMUSG00000097692 | A230060F14Rik  | 20 | ENSMUSG00000031070 | Mrgprf   | 20 |
| ENSMUSG00000086877 | A230072C01Rik  | 20 | ENSMUSG00000004996 | Mri1     | 1  |
| ENSMUSG00000084771 | A230072E10Rik  | 20 | ENSMUSG00000098404 | Mrip-ps  | 20 |
| ENSMUSG00000074473 | A230072I06Rik  | 20 | ENSMUSG00000018405 | Mrm1     | 20 |
| ENSMUSG00000100600 | A230077H06Rik  | 20 | ENSMUSG00000029557 | Mrm2     | 12 |
| ENSMUSG00000112367 | A230081H15Rik  | 2  | ENSMUSG00000038046 | Mrm3     | 20 |
| ENSMUSG00000055818 | A230083G16Rik  | 20 | ENSMUSG00000020381 | Mrnip    | 20 |
| ENSMUSG00000110047 | A230085B16Rik  | 20 | ENSMUSG00000064036 | Mro      | 20 |
| ENSMUSG00000097381 | A230087F16Rik  | 8  | ENSMUSG00000022558 | Mroh1    | 9  |
| ENSMUSG00000087026 | A230103J11Rik  | 20 | ENSMUSG00000087230 | Mroh3    | 20 |
| ENSMUSG00000109122 | A230103L15Rik  | 3  | ENSMUSG00000072487 | Mroh5    | 20 |
| ENSMUSG00000097292 | A230107N01Rik  | 20 | ENSMUSG00000047502 | Mroh7    | 3  |
| ENSMUSG00000030111 | A2m            | 20 | ENSMUSG00000074627 | Mroh8    | 20 |
| ENSMUSG00000047228 | A2ml1          | 20 | ENSMUSG00000029486 | Mrpl1    | 20 |
| ENSMUSG00000052479 | A330008L17Rik  | 10 | ENSMUSG00000001445 | Mrpl10   | 20 |
| ENSMUSG00000097915 | A330009N23Rik  | 3  | ENSMUSG00000024902 | Mrpl11   | 12 |
| ENSMUSG00000104093 | A330015K06Rik  | 1  | ENSMUSG00000039640 | Mrpl12   | 20 |
| ENSMUSG00000096929 | A330023F24Rik  | 20 | ENSMUSG00000022370 | Mrpl13   | 12 |
| ENSMUSG00000097591 | A330032B11Rik  | 1  | ENSMUSG00000023939 | Mrpl14   | 12 |
| ENSMUSG00000097622 | A330033J07Rik  | 20 | ENSMUSG00000033845 | Mrpl15   | 10 |
| ENSMUSG00000085615 | A330035P11Rik  | 20 | ENSMUSG00000024683 | Mrpl16   | 20 |
| ENSMUSG00000086213 | A330040F15Rik  | 20 | ENSMUSG00000030879 | Mrpl17   | 20 |
| ENSMUSG00000087466 | A330041J22Rik  | 20 | ENSMUSG00000057388 | Mrpl18   | 10 |
| ENSMUSG00000097326 | A330048O09Rik  | 20 | ENSMUSG00000030045 | Mrpl19   | 20 |
| ENSMUSG00000111994 | A330049N07Rik  | 9  | ENSMUSG00000002767 | Mrpl2    | 12 |

|                    |               |    |                     |            |    |
|--------------------|---------------|----|---------------------|------------|----|
| ENSMUSG00000117100 | A330072L02Rik | 1  | ENSMUSG00000029066  | Mrpl20     | 19 |
| ENSMUSG00000102995 | A330074H02Rik | 20 | ENSMUSG00000024829  | Mrpl21     | 3  |
| ENSMUSG00000097960 | A330074K22Rik | 18 | ENSMUSG00000020514  | Mrpl22     | 20 |
| ENSMUSG00000113186 | A330076C08Rik | 18 | ENSMUSG00000037772  | Mrpl23     | 12 |
| ENSMUSG00000109321 | A330076H08Rik | 20 | ENSMUSG00000075279  | Mrpl23-ps1 | 12 |
| ENSMUSG00000114210 | A330084C13Rik | 20 | ENSMUSG00000019710  | Mrpl24     | 20 |
| ENSMUSG00000098284 | A330093E20Rik | 20 | ENSMUSG00000024414  | Mrpl27     | 20 |
| ENSMUSG00000086363 | A330102110Rik | 20 | ENSMUSG00000024181  | Mrpl28     | 12 |
| ENSMUSG00000028794 | A3galt2       | 20 | ENSMUSG00000032563  | Mrpl3      | 2  |
| ENSMUSG00000047613 | A430005L14Rik | 20 | ENSMUSG00000026087  | Mrpl30     | 12 |
| ENSMUSG00000097603 | A430010J10Rik | 6  | ENSMUSG00000015672  | Mrpl32     | 20 |
| ENSMUSG00000085315 | A430018G15Rik | 12 | ENSMUSG000000106918 | Mrpl33     | 12 |
| ENSMUSG00000117429 | A430019L02Rik | 20 | ENSMUSG00000034880  | Mrpl34     | 9  |
| ENSMUSG00000104432 | A430027C01Rik | 20 | ENSMUSG00000052962  | Mrpl35     | 20 |
| ENSMUSG00000104507 | A430027H14Rik | 20 | ENSMUSG00000021607  | Mrpl36     | 12 |
| ENSMUSG00000056014 | A430033K04Rik | 20 | ENSMUSG00000028622  | Mrpl37     | 19 |
| ENSMUSG00000087305 | A430035B10Rik | 20 | ENSMUSG00000020775  | Mrpl38     | 2  |
| ENSMUSG00000090564 | A430057M04Rik | 20 | ENSMUSG00000022889  | Mrpl39     | 20 |
| ENSMUSG00000105471 | A430073D23Rik | 20 | ENSMUSG00000003299  | Mrpl4      | 12 |
| ENSMUSG00000112096 | A430103D13Rik | 20 | ENSMUSG00000022706  | Mrpl40     | 20 |
| ENSMUSG00000097784 | A430105J06Rik | 20 | ENSMUSG00000036850  | Mrpl41     | 7  |
| ENSMUSG00000098206 | A430106G13Rik | 20 | ENSMUSG00000062981  | Mrpl42     | 12 |
| ENSMUSG00000086851 | A430108G06Rik | 20 | ENSMUSG00000025208  | Mrpl43     | 20 |
| ENSMUSG00000102415 | A430110C17Rik | 20 | ENSMUSG00000026248  | Mrpl44     | 20 |
| ENSMUSG00000054135 | A430110L20Rik | 20 | ENSMUSG00000018882  | Mrpl45     | 20 |
| ENSMUSG00000047878 | A4galt        | 20 | ENSMUSG00000030612  | Mrpl46     | 20 |
| ENSMUSG00000006462 | A530013C23Rik | 19 | ENSMUSG00000037531  | Mrpl47     | 3  |
| ENSMUSG00000072847 | A530017D24Rik | 19 | ENSMUSG00000030706  | Mrpl48     | 20 |
| ENSMUSG00000104973 | A530041M06Rik | 2  | ENSMUSG00000078480  | Mrpl48-ps  | 20 |
| ENSMUSG00000046764 | A530053G22Rik | 12 | ENSMUSG00000007338  | Mrpl49     | 20 |
| ENSMUSG00000087694 | A530058N18Rik | 20 | ENSMUSG00000044018  | Mrpl50     | 20 |
| ENSMUSG00000104273 | A530064N14Rik | 17 | ENSMUSG00000030335  | Mrpl51     | 20 |
| ENSMUSG00000085112 | A530072M11Rik | 20 | ENSMUSG00000010406  | Mrpl52     | 3  |
| ENSMUSG00000097322 | A530083I20Rik | 20 | ENSMUSG00000034932  | Mrpl54     | 12 |
| ENSMUSG00000106024 | A530083M17Rik | 20 | ENSMUSG00000036860  | Mrpl55     | 3  |
| ENSMUSG00000090863 | A530084C06Rik | 20 | ENSMUSG00000021967  | Mrpl57     | 20 |
| ENSMUSG00000052760 | A630001G21Rik | 20 | ENSMUSG00000018858  | Mrpl58     | 7  |
| ENSMUSG00000116809 | A630036G19Rik | 7  | ENSMUSG00000028140  | Mrpl9      | 20 |
| ENSMUSG00000086725 | A630052C17Rik | 13 | ENSMUSG00000030611  | Mrps11     | 20 |
| ENSMUSG00000101013 | A630072M18Rik | 20 | ENSMUSG00000045948  | Mrps12     | 12 |
| ENSMUSG00000102721 | A630081D01Rik | 20 | ENSMUSG00000058267  | Mrps14     | 20 |
| ENSMUSG00000116673 | A630089N07Rik | 1  | ENSMUSG00000028861  | Mrps15     | 20 |
| ENSMUSG00000084846 | A730011C13Rik | 20 | ENSMUSG00000049960  | Mrps16     | 20 |
| ENSMUSG00000085566 | A730017L22Rik | 9  | ENSMUSG00000034211  | Mrps17     | 9  |
| ENSMUSG00000047828 | A730018C14Rik | 20 | ENSMUSG00000023967  | Mrps18a    | 3  |
| ENSMUSG00000097924 | A730020E08Rik | 20 | ENSMUSG00000024436  | Mrps18b    | 20 |
| ENSMUSG00000044522 | A730020M07Rik | 20 | ENSMUSG00000016833  | Mrps18c    | 12 |
| ENSMUSG00000085139 | A730046J19Rik | 20 | ENSMUSG00000035772  | Mrps2      | 20 |
| ENSMUSG00000097756 | A730056A06Rik | 9  | ENSMUSG00000054312  | Mrps21     | 12 |
| ENSMUSG00000092375 | A730060N03Rik | 20 | ENSMUSG00000032459  | Mrps22     | 1  |
| ENSMUSG00000053588 | A730061H03Rik | 20 | ENSMUSG00000020477  | Mrps24     | 19 |
| ENSMUSG00000102971 | A730062M13Rik | 20 | ENSMUSG00000014551  | Mrps25     | 20 |
| ENSMUSG00000112639 | A730063M14Rik | 20 | ENSMUSG00000037740  | Mrps26     | 12 |
| ENSMUSG00000086693 | A730081D07Rik | 20 | ENSMUSG00000041632  | Mrps27     | 20 |
| ENSMUSG00000093598 | A730085K08Rik | 20 | ENSMUSG00000040269  | Mrps28     | 3  |

|                    |               |    |                    |            |    |
|--------------------|---------------|----|--------------------|------------|----|
| ENSMUSG00000103529 | A730089K16Rik | 9  | ENSMUSG00000021731 | Mrps30     | 20 |
| ENSMUSG00000113965 | A730091E23Rik | 20 | ENSMUSG00000031533 | Mrps31     | 19 |
| ENSMUSG00000100812 | A730098A19Rik | 20 | ENSMUSG00000029918 | Mrps33     | 12 |
| ENSMUSG00000053181 | A830005F24Rik | 9  | ENSMUSG00000038880 | Mrps34     | 20 |
| ENSMUSG00000100627 | A830008E24Rik | 20 | ENSMUSG00000040112 | Mrps35     | 20 |
| ENSMUSG00000089957 | A830011K09Rik | 18 | ENSMUSG00000061474 | Mrps36     | 12 |
| ENSMUSG00000085996 | A830012C17Rik | 20 | ENSMUSG00000021631 | Mrps36-ps1 | 12 |
| ENSMUSG00000057715 | A830018L16Rik | 15 | ENSMUSG00000081911 | Mrps36-ps2 | 20 |
| ENSMUSG00000094707 | A830019P07Rik | 20 | ENSMUSG00000027374 | Mrps5      | 11 |
| ENSMUSG00000117645 | A830021F12Rik | 20 | ENSMUSG00000039680 | Mrps6      | 20 |
| ENSMUSG00000055010 | A830031A19Rik | 20 | ENSMUSG00000046756 | Mrps7      | 12 |
| ENSMUSG00000111329 | A830035O19Rik | 20 | ENSMUSG00000060679 | Mrps9      | 12 |
| ENSMUSG00000084890 | A830036E02Rik | 8  | ENSMUSG00000026887 | Mrrf       | 20 |
| ENSMUSG00000097413 | A830052D11Rik | 1  | ENSMUSG00000021339 | Mrs2       | 19 |
| ENSMUSG00000091890 | A830073O21Rik | 9  | ENSMUSG00000042292 | Mrtfa      | 9  |
| ENSMUSG00000087143 | A830082K12Rik | 18 | ENSMUSG00000009569 | Mrtfb      | 6  |
| ENSMUSG00000112280 | A830082N09Rik | 20 | ENSMUSG00000028741 | Mrto4      | 12 |
| ENSMUSG00000074664 | A830092H15Rik | 9  | ENSMUSG00000113749 | Mrto4-ps1  | 20 |
| ENSMUSG00000114961 | A930002C04Rik | 20 | ENSMUSG00000005611 | Mrvi1      | 18 |
| ENSMUSG00000109242 | A930002H02Rik | 20 | ENSMUSG00000024677 | Ms4a6b     | 20 |
| ENSMUSG00000075330 | A930003A15Rik | 20 | ENSMUSG00000079419 | Ms4a6c     | 20 |
| ENSMUSG00000105076 | A930003O13Rik | 20 | ENSMUSG00000024679 | Ms4a6d     | 20 |
| ENSMUSG00000054057 | A930004D18Rik | 20 | ENSMUSG00000051246 | Msantd1    | 9  |
| ENSMUSG00000102602 | A930004J17Rik | 2  | ENSMUSG00000042138 | Msantd2    | 20 |
| ENSMUSG00000106887 | A930005G22Rik | 20 | ENSMUSG00000039693 | Msantd3    | 3  |
| ENSMUSG00000054426 | A930005H10Rik | 20 | ENSMUSG00000041124 | Msantd4    | 20 |
| ENSMUSG00000103001 | A930005N03Rik | 16 | ENSMUSG00000024151 | Msh2       | 20 |
| ENSMUSG00000084866 | A930006K02Rik | 20 | ENSMUSG00000014850 | Msh3       | 4  |
| ENSMUSG00000097855 | A930007119Rik | 20 | ENSMUSG00000005493 | Msh4       | 20 |
| ENSMUSG00000092210 | A930009A15Rik | 20 | ENSMUSG00000007035 | Msh5       | 20 |
| ENSMUSG00000097610 | A930012L18Rik | 20 | ENSMUSG00000005370 | Msh6       | 12 |
| ENSMUSG00000054181 | A930012O16Rik | 20 | ENSMUSG00000054256 | Msi1       | 9  |
| ENSMUSG00000092368 | A930015D03Rik | 20 | ENSMUSG00000069769 | Msi2       | 12 |
| ENSMUSG00000114526 | A930015P04Rik | 20 | ENSMUSG00000052915 | Msl1       | 9  |
| ENSMUSG00000040705 | A930016O22Rik | 20 | ENSMUSG00000066415 | Msl2       | 12 |
| ENSMUSG00000025727 | A930017K11Rik | 20 | ENSMUSG00000031358 | Msl3       | 20 |
| ENSMUSG00000060530 | A930017M01Rik | 9  | ENSMUSG00000047669 | Msl3l2     | 20 |
| ENSMUSG00000113575 | A930023M06Rik | 1  | ENSMUSG00000031604 | Msmo1      | 1  |
| ENSMUSG00000056735 | A930024E05Rik | 1  | ENSMUSG00000031207 | Msn        | 20 |
| ENSMUSG00000113688 | A930027P06Rik | 10 | ENSMUSG00000025044 | Msr1       | 20 |
| ENSMUSG00000114796 | A930028N01Rik | 18 | ENSMUSG00000054733 | Msr2       | 5  |
| ENSMUSG00000105226 | A930028O11Rik | 20 | ENSMUSG00000075705 | Msr3       | 20 |
| ENSMUSG00000096988 | A930029G22Rik | 18 | ENSMUSG00000023094 | Msr4       | 1  |
| ENSMUSG00000108985 | A930030B08Rik | 1  | ENSMUSG00000051236 | Msr5       | 9  |
| ENSMUSG00000090622 | A930033H14Rik | 20 | ENSMUSG00000021815 | Mss51      | 20 |
| ENSMUSG00000052241 | A930035D04Rik | 20 | ENSMUSG00000032584 | Mst1r      | 20 |
| ENSMUSG00000105469 | A930036I15Rik | 20 | ENSMUSG00000068922 | Msto1      | 7  |
| ENSMUSG00000109408 | A930037H05Rik | 20 | ENSMUSG00000048450 | Msx1       | 13 |
| ENSMUSG00000045339 | A930104D05Rik | 20 | ENSMUSG00000064357 | mt-Atp6    | 20 |
| ENSMUSG00000074357 | AA386476      | 20 | ENSMUSG00000064356 | mt-Atp8    | 20 |
| ENSMUSG00000117896 | AA387883      | 9  | ENSMUSG00000064351 | mt-Co1     | 20 |
| ENSMUSG00000118084 | AA388235      | 11 | ENSMUSG00000064354 | mt-Co2     | 20 |
| ENSMUSG00000084381 | AA413626      | 10 | ENSMUSG00000064358 | mt-Co3     | 19 |
| ENSMUSG00000083307 | AA414768      | 9  | ENSMUSG00000064370 | mt-Cytb    | 16 |
| ENSMUSG00000093483 | AA465934      | 20 | ENSMUSG00000064341 | mt-Nd1     | 20 |

|                    |          |    |                   |         |    |
|--------------------|----------|----|-------------------|---------|----|
| ENSMUSG0000073867  | AA474408 | 20 | ENSMUSG0000064345 | mt-Nd2  | 20 |
| ENSMUSG00000103149 | AA914427 | 20 | ENSMUSG0000064360 | mt-Nd3  | 12 |
| ENSMUSG0000042510  | AA986860 | 20 | ENSMUSG0000064363 | mt-Nd4  | 20 |
| ENSMUSG0000036678  | Aaas     | 20 | ENSMUSG0000065947 | mt-Nd4l | 20 |
| ENSMUSG0000029482  | Aacs     | 20 | ENSMUSG0000064367 | mt-Nd5  | 16 |
| ENSMUSG0000037257  | Aagab    | 20 | ENSMUSG0000064368 | mt-Nd6  | 20 |
| ENSMUSG0000057230  | Aak1     | 12 | ENSMUSG0000064337 | mt-Rnr1 | 20 |
| ENSMUSG0000035642  | Aamdc    | 12 | ENSMUSG0000064339 | mt-Rnr2 | 20 |
| ENSMUSG0000006299  | Aamp     | 10 | ENSMUSG0000064347 | mt-Ta   | 10 |
| ENSMUSG0000020804  | Aanat    | 20 | ENSMUSG0000064349 | mt-Tc   | 20 |
| ENSMUSG0000027628  | Aar2     | 1  | ENSMUSG0000064369 | mt-Te   | 20 |
| ENSMUSG0000068522  | Aard     | 9  | ENSMUSG0000064336 | mt-Tf   | 10 |
| ENSMUSG0000031960  | Aars     | 9  | ENSMUSG0000064359 | mt-Tg   | 10 |
| ENSMUSG0000023938  | Aars2    | 20 | ENSMUSG0000064364 | mt-Th   | 10 |
| ENSMUSG0000075528  | Aarsd1   | 12 | ENSMUSG0000064342 | mt-Ti   | 10 |
| ENSMUSG0000055923  | Aasdh    | 9  | ENSMUSG0000064355 | mt-Tk   | 10 |
| ENSMUSG0000025894  | Aasdhppt | 13 | ENSMUSG0000064340 | mt-Tl1  | 10 |
| ENSMUSG0000029695  | Aass     | 20 | ENSMUSG0000064366 | mt-Tl2  | 10 |
| ENSMUSG0000018697  | Aatf     | 1  | ENSMUSG0000064344 | mt-Tm   | 10 |
| ENSMUSG0000025375  | Aatk     | 18 | ENSMUSG0000064372 | mt-Tp   | 10 |
| ENSMUSG0000046109  | AB041806 | 20 | ENSMUSG0000064343 | mt-Tq   | 10 |
| ENSMUSG0000057880  | Abat     | 20 | ENSMUSG0000064361 | mt-Tr   | 10 |
| ENSMUSG0000015243  | Abca1    | 15 | ENSMUSG0000064352 | mt-Ts1  | 1  |
| ENSMUSG0000035435  | Abca17   | 20 | ENSMUSG0000064365 | mt-Ts2  | 10 |
| ENSMUSG0000026944  | Abca2    | 15 | ENSMUSG0000064371 | mt-Tt   | 10 |
| ENSMUSG0000024130  | Abca3    | 18 | ENSMUSG0000064338 | mt-Tv   | 10 |
| ENSMUSG0000028125  | Abca4    | 13 | ENSMUSG0000064346 | mt-Tw   | 20 |
| ENSMUSG0000018800  | Abca5    | 19 | ENSMUSG0000064350 | mt-Ty   | 9  |
| ENSMUSG0000044749  | Abca6    | 20 | ENSMUSG0000031765 | Mt1     | 9  |
| ENSMUSG0000035722  | Abca7    | 9  | ENSMUSG0000031762 | Mt2     | 3  |
| ENSMUSG0000041828  | Abca8a   | 20 | ENSMUSG0000031760 | Mt3     | 10 |
| ENSMUSG0000020620  | Abca8b   | 1  | ENSMUSG0000021144 | Mta1    | 20 |
| ENSMUSG0000041797  | Abca9    | 20 | ENSMUSG0000071646 | Mta2    | 20 |
| ENSMUSG0000031974  | Abcb10   | 20 | ENSMUSG0000055817 | Mta3    | 9  |
| ENSMUSG0000040584  | Abcb1a   | 20 | ENSMUSG0000091510 | Mtag2   | 5  |
| ENSMUSG0000028970  | Abcb1b   | 20 | ENSMUSG0000062937 | Mtap    | 18 |
| ENSMUSG0000042476  | Abcb4    | 1  | ENSMUSG0000022369 | Mtbp    | 2  |
| ENSMUSG0000026198  | Abcb6    | 20 | ENSMUSG0000024012 | Mtch1   | 20 |
| ENSMUSG0000031333  | Abcb7    | 20 | ENSMUSG0000027282 | Mtch2   | 20 |
| ENSMUSG0000028973  | Abcb8    | 20 | ENSMUSG0000052105 | Mtcl1   | 9  |
| ENSMUSG0000029408  | Abcb9    | 9  | ENSMUSG0000031200 | Mtcp1   | 20 |
| ENSMUSG0000023088  | Abcc1    | 9  | ENSMUSG0000022255 | Mtdh    | 20 |
| ENSMUSG0000032842  | Abcc10   | 20 | ENSMUSG0000040429 | Mterf1a | 1  |
| ENSMUSG0000036872  | Abcc12   | 9  | ENSMUSG0000053178 | Mterf1b | 1  |
| ENSMUSG0000020865  | Abcc3    | 20 | ENSMUSG0000049038 | Mterf2  | 20 |
| ENSMUSG0000032849  | Abcc4    | 20 | ENSMUSG0000021519 | Mterf3  | 20 |
| ENSMUSG0000022822  | Abcc5    | 9  | ENSMUSG0000026273 | Mterf4  | 20 |
| ENSMUSG0000030834  | Abcc6    | 20 | ENSMUSG0000028890 | Mtf1    | 20 |
| ENSMUSG0000040136  | Abcc8    | 20 | ENSMUSG0000029267 | Mtf2    | 18 |
| ENSMUSG0000030249  | Abcc9    | 20 | ENSMUSG0000059183 | Mtfmt   | 1  |
| ENSMUSG0000031378  | Abcd1    | 20 | ENSMUSG0000004748 | Mtfp1   | 20 |
| ENSMUSG0000055782  | Abcd2    | 20 | ENSMUSG0000027601 | Mtfr1   | 20 |
| ENSMUSG0000028127  | Abcd3    | 20 | ENSMUSG0000046671 | Mtfr1l  | 9  |
| ENSMUSG0000021240  | Abcd4    | 20 | ENSMUSG0000019992 | Mtfr2   | 20 |
| ENSMUSG0000058355  | Abce1    | 20 | ENSMUSG0000039018 | Mtg1    | 20 |

|                    |            |    |                    |         |    |
|--------------------|------------|----|--------------------|---------|----|
| ENSMUSG0000038762  | Abcf1      | 1  | ENSMUSG0000039069  | Mtg2    | 20 |
| ENSMUSG0000028953  | Abcf2      | 20 | ENSMUSG0000021048  | Mthfd1  | 19 |
| ENSMUSG0000003234  | Abcf3      | 20 | ENSMUSG00000040675 | Mthfd1l | 20 |
| ENSMUSG0000024030  | Abcg1      | 19 | ENSMUSG00000005667 | Mthfd2  | 20 |
| ENSMUSG0000029802  | Abcg2      | 20 | ENSMUSG00000029376 | Mthfd2l | 20 |
| ENSMUSG0000029299  | Abcg3      | 20 | ENSMUSG00000029009 | Mthfr   | 20 |
| ENSMUSG00000032131 | Abcg4      | 9  | ENSMUSG00000066442 | Mthfs   | 20 |
| ENSMUSG0000006638  | Abhd1      | 1  | ENSMUSG00000031816 | Mthfsd  | 1  |
| ENSMUSG00000033157 | Abhd10     | 20 | ENSMUSG00000079427 | Mthfsl  | 12 |
| ENSMUSG00000040532 | Abhd11     | 20 | ENSMUSG00000020459 | Mtif2   | 20 |
| ENSMUSG00000085042 | Abhd11os   | 1  | ENSMUSG00000016510 | Mtif3   | 20 |
| ENSMUSG00000032046 | Abhd12     | 20 | ENSMUSG00000051319 | Mtln    | 12 |
| ENSMUSG00000090121 | Abhd12b    | 18 | ENSMUSG00000031337 | Mtm1    | 20 |
| ENSMUSG00000040396 | Abhd13     | 3  | ENSMUSG00000015214 | Mtmr1   | 20 |
| ENSMUSG00000042210 | Abhd14a    | 9  | ENSMUSG00000030522 | Mtmr10  | 3  |
| ENSMUSG00000042073 | Abhd14b    | 20 | ENSMUSG00000045934 | Mtmr11  | 18 |
| ENSMUSG00000006686 | Abhd15     | 20 | ENSMUSG00000039458 | Mtmr12  | 5  |
| ENSMUSG00000007036 | Abhd16a    | 20 | ENSMUSG00000030269 | Mtmr14  | 20 |
| ENSMUSG00000003346 | Abhd17a    | 3  | ENSMUSG00000031918 | Mtmr2   | 4  |
| ENSMUSG00000047368 | Abhd17b    | 9  | ENSMUSG00000034354 | Mtmr3   | 3  |
| ENSMUSG00000038459 | Abhd17c    | 6  | ENSMUSG00000018401 | Mtmr4   | 20 |
| ENSMUSG00000037818 | Abhd18     | 20 | ENSMUSG00000021987 | Mtmr6   | 20 |
| ENSMUSG00000039202 | Abhd2      | 9  | ENSMUSG00000039431 | Mtmr7   | 14 |
| ENSMUSG00000002475 | Abhd3      | 20 | ENSMUSG00000035078 | Mtmr9   | 2  |
| ENSMUSG00000040997 | Abhd4      | 2  | ENSMUSG00000032342 | Mto1    | 10 |
| ENSMUSG00000032540 | Abhd5      | 20 | ENSMUSG00000028991 | Mtor    | 2  |
| ENSMUSG00000025277 | Abhd6      | 20 | ENSMUSG00000024234 | Mtpap   | 20 |
| ENSMUSG00000007950 | Abhd8      | 20 | ENSMUSG00000029840 | Mtpn    | 9  |
| ENSMUSG00000058835 | Abi1       | 9  | ENSMUSG00000021311 | Mtr     | 20 |
| ENSMUSG00000026782 | Abi2       | 9  | ENSMUSG00000016018 | Mtrex   | 20 |
| ENSMUSG00000018381 | Abi3       | 20 | ENSMUSG00000022022 | Mtrf1   | 20 |
| ENSMUSG00000035258 | Abi3bp     | 9  | ENSMUSG00000019774 | Mtrf1l  | 1  |
| ENSMUSG00000038827 | Abitram    | 20 | ENSMUSG00000034617 | Mtrr    | 20 |
| ENSMUSG00000026842 | Ab11       | 20 | ENSMUSG00000022353 | Mtss1   | 9  |
| ENSMUSG00000026596 | Ab12       | 9  | ENSMUSG00000033763 | Mtss2   | 6  |
| ENSMUSG00000025085 | Ablim1     | 19 | ENSMUSG00000028158 | Mttp    | 1  |
| ENSMUSG00000029095 | Ablim2     | 19 | ENSMUSG00000038065 | Mturn   | 19 |
| ENSMUSG00000032735 | Ablim3     | 19 | ENSMUSG00000045636 | Mtus1   | 16 |
| ENSMUSG00000017631 | Abr        | 5  | ENSMUSG00000029651 | Mtus2   | 20 |
| ENSMUSG00000078453 | Abracl     | 18 | ENSMUSG00000064068 | Mtx1    | 19 |
| ENSMUSG00000035234 | Abraxas1   | 20 | ENSMUSG00000027099 | Mtx2    | 20 |
| ENSMUSG00000030965 | Abraxas2   | 20 | ENSMUSG00000021704 | Mtx3    | 20 |
| ENSMUSG00000036376 | Abt1       | 20 | ENSMUSG00000042784 | Muc1    | 20 |
| ENSMUSG00000030083 | Abtb1      | 20 | ENSMUSG00000094840 | Muc3a   | 9  |
| ENSMUSG00000032724 | Abtb2      | 20 | ENSMUSG00000041241 | Mul1    | 20 |
| ENSMUSG00000118501 | AC020971.1 | 20 | ENSMUSG00000024906 | Mus81   | 1  |
| ENSMUSG00000118577 | AC099699.1 | 20 | ENSMUSG00000057280 | Musk    | 9  |
| ENSMUSG00000118534 | AC102368.1 | 3  | ENSMUSG00000042485 | Mustn1  | 20 |
| ENSMUSG00000118561 | AC102368.2 | 20 | ENSMUSG00000028687 | Mutyh   | 18 |
| ENSMUSG00000117102 | AC107792.1 | 20 | ENSMUSG00000031813 | Mvb12a  | 20 |
| ENSMUSG00000117901 | AC109619.1 | 20 | ENSMUSG00000038740 | Mvb12b  | 9  |
| ENSMUSG00000111374 | AC113305.1 | 20 | ENSMUSG00000006517 | Mvd     | 20 |
| ENSMUSG00000118426 | AC115893.1 | 1  | ENSMUSG00000041939 | Mvk     | 20 |
| ENSMUSG00000118492 | AC121143.1 | 20 | ENSMUSG00000030681 | Mvp     | 20 |
| ENSMUSG00000118419 | AC124413.1 | 9  | ENSMUSG00000000386 | Mx1     | 20 |

|                    |            |    |                    |           |    |
|--------------------|------------|----|--------------------|-----------|----|
| ENSMUSG00000118364 | AC124502.1 | 20 | ENSMUSG00000023341 | Mx2       | 20 |
| ENSMUSG00000118029 | AC132288.1 | 20 | ENSMUSG00000001156 | Mxd1      | 9  |
| ENSMUSG00000117775 | AC132307.1 | 20 | ENSMUSG00000021485 | Mxd3      | 20 |
| ENSMUSG00000096808 | AC132444.6 | 20 | ENSMUSG00000037235 | Mxd4      | 20 |
| ENSMUSG00000118550 | AC135859.1 | 20 | ENSMUSG00000025025 | Mxi1      | 3  |
| ENSMUSG00000118456 | AC137513.1 | 4  | ENSMUSG00000020814 | Mxra7     | 5  |
| ENSMUSG00000117238 | AC139131.1 | 20 | ENSMUSG00000029070 | Mxra8     | 14 |
| ENSMUSG00000118410 | AC139347.1 | 20 | ENSMUSG00000025141 | Myadml2   | 20 |
| ENSMUSG00000118094 | AC142100.1 | 20 | ENSMUSG00000084822 | Myadml2os | 20 |
| ENSMUSG00000118487 | AC145556.1 | 20 | ENSMUSG00000019982 | Myb       | 20 |
| ENSMUSG00000095041 | AC149090.1 | 2  | ENSMUSG00000040463 | Mybbp1a   | 9  |
| ENSMUSG00000118555 | AC150312.1 | 20 | ENSMUSG00000025912 | Mybl1     | 19 |
| ENSMUSG00000118423 | AC154328.1 | 20 | ENSMUSG00000017861 | Mybl2     | 20 |
| ENSMUSG00000117546 | AC154542.1 | 20 | ENSMUSG00000020061 | Mybpc1    | 20 |
| ENSMUSG00000118559 | AC154607.1 | 20 | ENSMUSG00000038670 | Mybpc2    | 20 |
| ENSMUSG00000118018 | AC156546.1 | 20 | ENSMUSG00000042451 | Mybph     | 20 |
| ENSMUSG00000118477 | AC159140.2 | 20 | ENSMUSG00000022346 | Myc       | 20 |
| ENSMUSG00000118499 | AC160138.1 | 1  | ENSMUSG00000028647 | Mycbp     | 12 |
| ENSMUSG00000117733 | AC163347.1 | 20 | ENSMUSG00000033004 | Mycbp2    | 3  |
| ENSMUSG00000118504 | AC163616.1 | 12 | ENSMUSG00000039110 | Mycbpap   | 13 |
| ENSMUSG00000118071 | AC166172.1 | 20 | ENSMUSG00000028654 | Mycl      | 5  |
| ENSMUSG00000115852 | AC169509.1 | 20 | ENSMUSG00000037169 | Mycn      | 20 |
| ENSMUSG00000118449 | AC241534.1 | 20 | ENSMUSG00000032508 | Myd88     | 1  |
| ENSMUSG00000036138 | Acaa1a     | 12 | ENSMUSG00000019579 | Mydgf     | 20 |
| ENSMUSG00000010651 | Acaa1b     | 20 | ENSMUSG00000027201 | Myef2     | 16 |
| ENSMUSG00000036880 | Acaa2      | 12 | ENSMUSG00000001285 | Myg1      | 10 |
| ENSMUSG00000020532 | Acaca      | 9  | ENSMUSG00000020900 | Myh10     | 9  |
| ENSMUSG00000042010 | Acacb      | 13 | ENSMUSG00000018830 | Myh11     | 20 |
| ENSMUSG00000029456 | Acad10     | 20 | ENSMUSG00000030739 | Myh14     | 16 |
| ENSMUSG00000090150 | Acad11     | 15 | ENSMUSG00000092009 | Myh15     | 20 |
| ENSMUSG00000042647 | Acad12     | 20 | ENSMUSG00000020908 | Myh3      | 20 |
| ENSMUSG00000031969 | Acad8      | 20 | ENSMUSG00000053093 | Myh7      | 19 |
| ENSMUSG00000027710 | Acad9      | 20 | ENSMUSG00000074652 | Myh7b     | 1  |
| ENSMUSG00000026003 | Acadl      | 20 | ENSMUSG00000022443 | Myh9      | 20 |
| ENSMUSG00000062908 | Acadm      | 20 | ENSMUSG00000024048 | Myl12a    | 20 |
| ENSMUSG00000029545 | Acads      | 5  | ENSMUSG00000034868 | Myl12b    | 12 |
| ENSMUSG00000030861 | Acadsb     | 20 | ENSMUSG00000013936 | Myl2      | 20 |
| ENSMUSG00000018574 | Acadvl     | 7  | ENSMUSG00000061086 | Myl4      | 12 |
| ENSMUSG00000030607 | Acan       | 20 | ENSMUSG00000090841 | Myl6      | 12 |
| ENSMUSG00000049076 | Acap2      | 9  | ENSMUSG00000039824 | Myl6b     | 9  |
| ENSMUSG00000029033 | Acap3      | 9  | ENSMUSG00000067818 | Myl9      | 1  |
| ENSMUSG00000032047 | Acat1      | 20 | ENSMUSG00000038175 | Mylip     | 20 |
| ENSMUSG00000023832 | Acat2      | 1  | ENSMUSG00000022836 | Mylk      | 12 |
| ENSMUSG00000062480 | Acat3      | 20 | ENSMUSG00000030672 | Mylpf     | 20 |
| ENSMUSG00000026499 | Acbd3      | 9  | ENSMUSG00000037730 | Mynn      | 20 |
| ENSMUSG00000056938 | Acbd4      | 20 | ENSMUSG00000022272 | Myo10     | 20 |
| ENSMUSG00000026781 | Acbd5      | 20 | ENSMUSG00000034427 | Myo15b    | 7  |
| ENSMUSG00000033701 | Acbd6      | 20 | ENSMUSG00000039057 | Myo16     | 20 |
| ENSMUSG00000040272 | Accs       | 20 | ENSMUSG00000000631 | Myo18a    | 1  |
| ENSMUSG00000038000 | Acd        | 20 | ENSMUSG00000072720 | Myo18b    | 20 |
| ENSMUSG00000020681 | Ace        | 13 | ENSMUSG00000020527 | Myo19     | 20 |
| ENSMUSG00000015405 | Ace2       | 17 | ENSMUSG00000025401 | Myo1a     | 1  |
| ENSMUSG00000038007 | Acer2      | 20 | ENSMUSG00000018417 | Myo1b     | 9  |
| ENSMUSG00000030760 | Acer3      | 20 | ENSMUSG00000017774 | Myo1c     | 9  |
| ENSMUSG00000023328 | Ache       | 9  | ENSMUSG00000035441 | Myo1d     | 16 |

|                   |          |    |                   |          |    |
|-------------------|----------|----|-------------------|----------|----|
| ENSMUSG0000022185 | Acin1    | 9  | ENSMUSG0000032220 | Myo1e    | 20 |
| ENSMUSG0000037872 | Ackr1    | 1  | ENSMUSG0000024300 | Myo1f    | 20 |
| ENSMUSG0000044534 | Ackr2    | 9  | ENSMUSG0000020437 | Myo1g    | 9  |
| ENSMUSG0000044337 | Ackr3    | 20 | ENSMUSG0000066952 | Myo1h    | 20 |
| ENSMUSG0000020917 | Acly     | 9  | ENSMUSG0000042064 | Myo3b    | 1  |
| ENSMUSG0000028405 | Aco1     | 20 | ENSMUSG0000034593 | Myo5a    | 18 |
| ENSMUSG0000022477 | Aco2     | 20 | ENSMUSG0000025885 | Myo5b    | 18 |
| ENSMUSG0000072949 | Acot1    | 1  | ENSMUSG0000033590 | Myo5c    | 1  |
| ENSMUSG0000034853 | Acot11   | 18 | ENSMUSG0000033577 | Myo6     | 20 |
| ENSMUSG0000021620 | Acot12   | 20 | ENSMUSG0000030761 | Myo7a    | 20 |
| ENSMUSG0000006717 | Acot13   | 10 | ENSMUSG0000024388 | Myo7b    | 9  |
| ENSMUSG0000021226 | Acot2    | 20 | ENSMUSG0000039585 | Myo9a    | 7  |
| ENSMUSG0000021228 | Acot3    | 20 | ENSMUSG0000004677 | Myo9b    | 20 |
| ENSMUSG0000052392 | Acot4    | 20 | ENSMUSG0000026697 | Myoc     | 2  |
| ENSMUSG0000043487 | Acot6    | 20 | ENSMUSG0000048612 | Myof     | 20 |
| ENSMUSG0000028937 | Acot7    | 9  | ENSMUSG0000024049 | Myom1    | 20 |
| ENSMUSG0000017307 | Acot8    | 8  | ENSMUSG0000037139 | Myom3    | 20 |
| ENSMUSG0000025287 | Acot9    | 9  | ENSMUSG0000046312 | Myorg    | 20 |
| ENSMUSG0000020777 | Acox1    | 1  | ENSMUSG0000024471 | Myot     | 20 |
| ENSMUSG0000029098 | Acox3    | 9  | ENSMUSG0000020067 | Mypn     | 20 |
| ENSMUSG0000044573 | Acp1     | 20 | ENSMUSG0000048481 | Mypop    | 20 |
| ENSMUSG0000002103 | Acp2     | 12 | ENSMUSG0000086533 | Mypopos  | 20 |
| ENSMUSG0000028093 | Acp6     | 1  | ENSMUSG0000036098 | Myrf     | 16 |
| ENSMUSG0000037469 | Acp7     | 20 | ENSMUSG0000041794 | Myrip    | 19 |
| ENSMUSG0000022622 | Acr      | 20 | ENSMUSG0000062627 | Mysm1    | 20 |
| ENSMUSG0000072770 | Acrbp    | 20 | ENSMUSG0000010505 | Myt1     | 19 |
| ENSMUSG0000032281 | Acsbg1   | 18 | ENSMUSG0000061911 | Myt1l    | 9  |
| ENSMUSG0000076435 | Acsf2    | 20 | ENSMUSG0000041361 | Myzap    | 20 |
| ENSMUSG0000015016 | Acsf3    | 20 | ENSMUSG0000030380 | Mzf1     | 9  |
| ENSMUSG0000018796 | Acs1     | 20 | ENSMUSG0000033186 | Mzt1     | 20 |
| ENSMUSG0000032883 | Acs13    | 18 | ENSMUSG0000022671 | Mzt2     | 12 |
| ENSMUSG0000031278 | Acs14    | 19 | ENSMUSG0000094265 | n-R5s109 | 10 |
| ENSMUSG0000024981 | Acs15    | 9  | ENSMUSG0000095915 | n-R5s115 | 10 |
| ENSMUSG0000020333 | Acs16    | 18 | ENSMUSG0000096037 | n-R5s136 | 10 |
| ENSMUSG0000030972 | Acsm5    | 1  | ENSMUSG0000065893 | n-R5s151 | 10 |
| ENSMUSG0000027452 | Acss1    | 20 | ENSMUSG0000084480 | n-R5s155 | 20 |
| ENSMUSG0000027605 | Acss2    | 18 | ENSMUSG0000065311 | n-R5s156 | 10 |
| ENSMUSG0000035948 | Acss3    | 20 | ENSMUSG0000065662 | n-R5s161 | 20 |
| ENSMUSG0000031972 | Acta1    | 20 | ENSMUSG0000064798 | n-R5s193 | 10 |
| ENSMUSG0000035783 | Acta2    | 20 | ENSMUSG0000094830 | n-R5s194 | 10 |
| ENSMUSG0000029580 | Actb     | 6  | ENSMUSG0000075918 | n-R5s2   | 10 |
| ENSMUSG0000074978 | Actg-ps1 | 12 | ENSMUSG0000077382 | n-R5s200 | 18 |
| ENSMUSG0000062825 | Actg1    | 20 | ENSMUSG0000064857 | n-R5s25  | 20 |
| ENSMUSG0000027671 | Actl6a   | 20 | ENSMUSG0000077789 | n-R5s26  | 20 |
| ENSMUSG0000029712 | Actl6b   | 3  | ENSMUSG0000064748 | n-R5s28  | 10 |
| ENSMUSG0000015143 | Actn1    | 9  | ENSMUSG0000070225 | n-R5s33  | 10 |
| ENSMUSG0000052374 | Actn2    | 9  | ENSMUSG0000064409 | n-R5s40  | 20 |
| ENSMUSG0000054808 | Actn4    | 3  | ENSMUSG0000084541 | n-R5s45  | 20 |
| ENSMUSG0000021076 | Actr10   | 9  | ENSMUSG0000084431 | n-R5s48  | 17 |
| ENSMUSG0000025228 | Actr1a   | 20 | ENSMUSG0000064455 | n-R5s56  | 10 |
| ENSMUSG0000037351 | Actr1b   | 20 | ENSMUSG0000064714 | n-R5s62  | 10 |
| ENSMUSG0000020152 | Actr2    | 10 | ENSMUSG0000077309 | n-R5s8   | 20 |
| ENSMUSG0000026341 | Actr3    | 18 | ENSMUSG0000084545 | n-R5s80  | 20 |
| ENSMUSG0000056367 | Actr3b   | 9  | ENSMUSG0000064618 | n-R5s95  | 20 |
| ENSMUSG0000037761 | Actr5    | 20 | ENSMUSG0000084498 | n-R5s98  | 20 |

|                    |          |    |                     |          |    |
|--------------------|----------|----|---------------------|----------|----|
| ENSMUSG00000019948 | Actr6    | 3  | ENSMUSG00000031652  | N4bp1    | 20 |
| ENSMUSG00000015971 | Actr8    | 20 | ENSMUSG00000037795  | N4bp2    | 18 |
| ENSMUSG00000037737 | Actrt3   | 20 | ENSMUSG00000041132  | N4bp211  | 20 |
| ENSMUSG00000026836 | Acvr1    | 9  | ENSMUSG00000029655  | N4bp212  | 7  |
| ENSMUSG00000000532 | Acvr1b   | 9  | ENSMUSG000000106978 | N4bp2os  | 1  |
| ENSMUSG00000026834 | Acvr1c   | 9  | ENSMUSG00000001053  | N4bp3    | 1  |
| ENSMUSG00000052155 | Acvr2a   | 12 | ENSMUSG00000044442  | N6amt1   | 20 |
| ENSMUSG00000061393 | Acvr2b   | 9  | ENSMUSG00000031388  | Naa10    | 20 |
| ENSMUSG00000000530 | Acvr11   | 9  | ENSMUSG00000063273  | Naa15    | 2  |
| ENSMUSG00000023262 | Acy1     | 3  | ENSMUSG00000022020  | Naa16    | 20 |
| ENSMUSG00000024866 | Acy3     | 9  | ENSMUSG00000002728  | Naa20    | 20 |
| ENSMUSG00000008822 | Acyp1    | 20 | ENSMUSG00000042719  | Naa25    | 20 |
| ENSMUSG00000060923 | Acyp2    | 20 | ENSMUSG00000036282  | Naa30    | 3  |
| ENSMUSG00000017697 | Ada      | 20 | ENSMUSG00000021555  | Naa35    | 5  |
| ENSMUSG00000027259 | Adal     | 20 | ENSMUSG00000059278  | Naa38    | 12 |
| ENSMUSG00000054693 | Adam10   | 20 | ENSMUSG00000024764  | Naa40    | 9  |
| ENSMUSG00000020926 | Adam11   | 19 | ENSMUSG00000022698  | Naa50    | 20 |
| ENSMUSG00000054555 | Adam12   | 20 | ENSMUSG00000005982  | Naa60    | 20 |
| ENSMUSG00000028041 | Adam15   | 20 | ENSMUSG00000079334  | Naa80    | 20 |
| ENSMUSG00000052593 | Adam17   | 20 | ENSMUSG00000029413  | Naaa     | 9  |
| ENSMUSG00000031552 | Adam18   | 20 | ENSMUSG00000043943  | Naalad2  | 20 |
| ENSMUSG00000011256 | Adam19   | 20 | ENSMUSG000000102758 | Naaladl2 | 20 |
| ENSMUSG00000072647 | Adam1a   | 20 | ENSMUSG00000002881  | Nab1     | 19 |
| ENSMUSG00000008438 | Adam21   | 20 | ENSMUSG00000025402  | Nab2     | 20 |
| ENSMUSG00000040537 | Adam22   | 7  | ENSMUSG00000026107  | Nabp1    | 20 |
| ENSMUSG00000025964 | Adam23   | 20 | ENSMUSG00000025374  | Nabp2    | 20 |
| ENSMUSG00000037437 | Adam32   | 20 | ENSMUSG00000061315  | Naca     | 3  |
| ENSMUSG00000072972 | Adam4    | 1  | ENSMUSG00000041073  | Nacad    | 18 |
| ENSMUSG00000025473 | Adam8    | 20 | ENSMUSG00000001910  | Nacc1    | 12 |
| ENSMUSG00000031555 | Adam9    | 20 | ENSMUSG00000026932  | Nacc2    | 18 |
| ENSMUSG00000022893 | Adamts1  | 20 | ENSMUSG00000029063  | Nadk     | 20 |
| ENSMUSG00000024299 | Adamts10 | 9  | ENSMUSG00000031090  | Nadsyn1  | 20 |
| ENSMUSG00000047497 | Adamts12 | 20 | ENSMUSG00000031878  | Nae1     | 20 |
| ENSMUSG00000033453 | Adamts15 | 18 | ENSMUSG00000014907  | Naf1     | 20 |
| ENSMUSG00000049538 | Adamts16 | 18 | ENSMUSG00000022453  | Naga     | 20 |
| ENSMUSG00000058145 | Adamts17 | 9  | ENSMUSG00000034744  | Nagk     | 1  |
| ENSMUSG00000053399 | Adamts18 | 20 | ENSMUSG00000001751  | Naglu    | 20 |
| ENSMUSG00000053441 | Adamts19 | 18 | ENSMUSG00000023143  | Nagpa    | 20 |
| ENSMUSG00000036545 | Adamts2  | 18 | ENSMUSG00000039164  | Naif1    | 20 |
| ENSMUSG00000022449 | Adamts20 | 20 | ENSMUSG00000078945  | Naip2    | 20 |
| ENSMUSG00000043635 | Adamts3  | 9  | ENSMUSG00000071203  | Naip5    | 20 |
| ENSMUSG00000006403 | Adamts4  | 16 | ENSMUSG00000078942  | Naip6    | 20 |
| ENSMUSG00000022894 | Adamts5  | 1  | ENSMUSG00000000197  | Nalcn    | 3  |
| ENSMUSG00000046169 | Adamts6  | 1  | ENSMUSG00000020572  | Nampt    | 20 |
| ENSMUSG00000032363 | Adamts7  | 20 | ENSMUSG00000072437  | Nanos1   | 9  |
| ENSMUSG00000031994 | Adamts8  | 19 | ENSMUSG00000051965  | Nanos2   | 20 |
| ENSMUSG00000030022 | Adamts9  | 20 | ENSMUSG00000056155  | Nanos3   | 20 |
| ENSMUSG00000066113 | Adamtsl1 | 9  | ENSMUSG00000053916  | Nanp     | 20 |
| ENSMUSG00000036040 | Adamtsl2 | 20 | ENSMUSG00000028334  | Nans     | 6  |
| ENSMUSG00000070469 | Adamtsl3 | 1  | ENSMUSG00000058799  | Nap1l1   | 18 |
| ENSMUSG00000015850 | Adamtsl4 | 20 | ENSMUSG00000082229  | Nap1l2   | 9  |
| ENSMUSG00000043822 | Adamtsl5 | 9  | ENSMUSG00000055733  | Nap1l3   | 9  |
| ENSMUSG00000056413 | Adap1    | 18 | ENSMUSG00000059119  | Nap1l4   | 7  |
| ENSMUSG00000020709 | Adap2    | 20 | ENSMUSG00000055430  | Nap1l5   | 17 |
| ENSMUSG00000027951 | Adar     | 20 | ENSMUSG00000006024  | Napa     | 20 |



|                    |           |    |                    |         |    |
|--------------------|-----------|----|--------------------|---------|----|
| ENSMUSG0000020262  | Adarb1    | 18 | ENSMUSG0000027438  | Napb    | 19 |
| ENSMUSG0000052551  | Adarb2    | 18 | ENSMUSG0000044968  | Napepld | 19 |
| ENSMUSG0000031949  | Adat1     | 20 | ENSMUSG0000024581  | Napg    | 9  |
| ENSMUSG0000019808  | Adat2     | 12 | ENSMUSG0000022574  | Naprt   | 20 |
| ENSMUSG0000021044  | Adck1     | 20 | ENSMUSG0000000056  | Narf    | 20 |
| ENSMUSG0000046947  | Adck2     | 20 | ENSMUSG0000024587  | Nars    | 18 |
| ENSMUSG0000022550  | Adck5     | 20 | ENSMUSG0000018995  | Nars2   | 9  |
| ENSMUSG0000020431  | Adcy1     | 19 | ENSMUSG0000028693  | Nasp    | 20 |
| ENSMUSG0000026567  | Adcy10    | 20 | ENSMUSG0000025588  | Nat1    | 20 |
| ENSMUSG0000021536  | Adcy2     | 5  | ENSMUSG0000027185  | Nat10   | 10 |
| ENSMUSG0000020654  | Adcy3     | 9  | ENSMUSG0000035285  | Nat14   | 9  |
| ENSMUSG0000022220  | Adcy4     | 20 | ENSMUSG00000051147 | Nat2    | 20 |
| ENSMUSG0000022840  | Adcy5     | 9  | ENSMUSG0000030004  | Nat8    | 20 |
| ENSMUSG0000022994  | Adcy6     | 6  | ENSMUSG00000057103 | Nat8f1  | 20 |
| ENSMUSG0000031659  | Adcy7     | 18 | ENSMUSG00000051262 | Nat8f3  | 20 |
| ENSMUSG0000022376  | Adcy8     | 18 | ENSMUSG00000068299 | Nat8f4  | 20 |
| ENSMUSG0000005580  | Adcy9     | 9  | ENSMUSG00000079494 | Nat8f5  | 20 |
| ENSMUSG0000024256  | Adcyap1   | 9  | ENSMUSG00000048142 | Nat8l   | 18 |
| ENSMUSG0000029778  | Adcyap1r1 | 9  | ENSMUSG0000015542  | Nat9    | 1  |
| ENSMUSG0000029106  | Add1      | 9  | ENSMUSG0000018931  | Natd1   | 20 |
| ENSMUSG0000030000  | Add2      | 9  | ENSMUSG00000009418 | Nav1    | 9  |
| ENSMUSG0000025026  | Add3      | 9  | ENSMUSG00000052512 | Nav2    | 19 |
| ENSMUSG0000050994  | Adgb      | 20 | ENSMUSG0000020181  | Nav3    | 9  |
| ENSMUSG0000025475  | Adgra1    | 18 | ENSMUSG0000031505  | Naxd    | 19 |
| ENSMUSG0000031486  | Adgra2    | 20 | ENSMUSG0000028070  | Naxe    | 20 |
| ENSMUSG0000029090  | Adgra3    | 20 | ENSMUSG0000020576  | Nbas    | 20 |
| ENSMUSG0000034730  | Adgrb1    | 20 | ENSMUSG00000086316 | Nbdy    | 8  |
| ENSMUSG0000028782  | Adgrb2    | 9  | ENSMUSG0000027799  | Nbea    | 7  |
| ENSMUSG0000033569  | Adgrb3    | 9  | ENSMUSG00000073664 | Nbeal1  | 12 |
| ENSMUSG0000044017  | Adgrd1    | 20 | ENSMUSG00000056724 | Nbeal2  | 20 |
| ENSMUSG0000004730  | Adgre1    | 9  | ENSMUSG00000041120 | Nbl1    | 20 |
| ENSMUSG0000002885  | Adgre5    | 20 | ENSMUSG0000028224  | Nbn     | 20 |
| ENSMUSG0000057899  | Adgrf2    | 20 | ENSMUSG0000017119  | Nbr1    | 20 |
| ENSMUSG0000023918  | Adgrf4    | 9  | ENSMUSG00000051359 | Ncald   | 5  |
| ENSMUSG0000056492  | Adgrf5    | 18 | ENSMUSG00000039542 | Ncam1   | 20 |
| ENSMUSG00000031785 | Adgrg1    | 9  | ENSMUSG00000022762 | Ncam2   | 20 |
| ENSMUSG00000031298 | Adgrg2    | 9  | ENSMUSG00000002341 | Ncan    | 6  |
| ENSMUSG00000060470 | Adgrg3    | 20 | ENSMUSG00000038252 | Ncapd2  | 6  |
| ENSMUSG0000039116  | Adgrg6    | 2  | ENSMUSG00000035024 | Ncapd3  | 20 |
| ENSMUSG0000013033  | Adgrl1    | 20 | ENSMUSG00000015880 | Ncapg   | 20 |
| ENSMUSG0000028184  | Adgrl2    | 20 | ENSMUSG00000042029 | Ncapg2  | 20 |
| ENSMUSG0000037605  | Adgrl3    | 7  | ENSMUSG00000034906 | Ncaph   | 9  |
| ENSMUSG0000039167  | Adgrl4    | 20 | ENSMUSG00000008690 | Ncaph2  | 20 |
| ENSMUSG00000069170 | Adgrv1    | 13 | ENSMUSG00000028330 | Ncbp1   | 20 |
| ENSMUSG0000028138  | Adh5      | 20 | ENSMUSG00000022774 | Ncbp2   | 20 |
| ENSMUSG0000025911  | Adhfe1    | 20 | ENSMUSG00000020783 | Ncbp3   | 1  |
| ENSMUSG0000020629  | Adi1      | 20 | ENSMUSG00000028833 | Ncdn    | 9  |
| ENSMUSG0000026457  | Adipor1   | 20 | ENSMUSG00000027698 | Nceh1   | 1  |
| ENSMUSG0000030168  | Adipor2   | 20 | ENSMUSG00000015950 | Ncf1    | 19 |
| ENSMUSG0000039197  | Adk       | 20 | ENSMUSG00000026480 | Ncf2    | 20 |
| ENSMUSG0000030790  | Adm       | 20 | ENSMUSG00000071715 | Ncf4    | 20 |
| ENSMUSG00000051149 | Adnp      | 2  | ENSMUSG00000032475 | Nck1    | 20 |
| ENSMUSG00000053950 | Adnp2     | 20 | ENSMUSG00000066877 | Nck2    | 20 |
| ENSMUSG00000042429 | Adora1    | 1  | ENSMUSG00000027002 | Nckap1  | 9  |
| ENSMUSG0000020178  | Adora2a   | 9  | ENSMUSG00000022488 | Nckap1l | 9  |

|                    |          |    |                    |            |    |
|--------------------|----------|----|--------------------|------------|----|
| ENSMUSG00000018500 | Adora2b  | 20 | ENSMUSG00000049690 | Nckap5     | 8  |
| ENSMUSG00000025236 | Adpgk    | 20 | ENSMUSG00000023009 | Nckap5l    | 20 |
| ENSMUSG00000002844 | Adprh    | 20 | ENSMUSG00000026234 | Ncl        | 3  |
| ENSMUSG00000031448 | Adprhl1  | 20 | ENSMUSG00000020238 | Ncln       | 20 |
| ENSMUSG00000042558 | Adprhl2  | 20 | ENSMUSG00000043924 | Ncmap      | 20 |
| ENSMUSG00000020910 | Adprm    | 20 | ENSMUSG00000020647 | Ncoa1      | 2  |
| ENSMUSG00000045875 | Adra1a   | 20 | ENSMUSG00000005886 | Ncoa2      | 20 |
| ENSMUSG00000050541 | Adra1b   | 18 | ENSMUSG00000027678 | Ncoa3      | 20 |
| ENSMUSG00000027335 | Adra1d   | 20 | ENSMUSG00000056234 | Ncoa4      | 7  |
| ENSMUSG00000033717 | Adra2a   | 18 | ENSMUSG00000039804 | Ncoa5      | 18 |
| ENSMUSG00000058620 | Adra2b   | 18 | ENSMUSG00000038369 | Ncoa6      | 20 |
| ENSMUSG00000045318 | Adra2c   | 9  | ENSMUSG00000039697 | Ncoa7      | 20 |
| ENSMUSG00000035283 | Adrb1    | 20 | ENSMUSG00000018501 | Ncor1      | 5  |
| ENSMUSG00000045730 | Adrb2    | 20 | ENSMUSG00000029478 | Ncor2      | 19 |
| ENSMUSG00000039041 | Adrm1    | 3  | ENSMUSG00000062661 | Ncs1       | 18 |
| ENSMUSG00000022407 | Adsl     | 20 | ENSMUSG00000003458 | Ncstn      | 20 |
| ENSMUSG00000015961 | Adss     | 20 | ENSMUSG00000028614 | Ndc1       | 20 |
| ENSMUSG00000011148 | Adssl1   | 20 | ENSMUSG00000024056 | Ndc80      | 20 |
| ENSMUSG00000020473 | Aebp1    | 14 | ENSMUSG00000022678 | Nde1       | 20 |
| ENSMUSG00000030232 | Aebp2    | 20 | ENSMUSG00000018736 | Ndel1      | 20 |
| ENSMUSG00000030609 | Aen      | 20 | ENSMUSG00000024425 | Ndfip1     | 9  |
| ENSMUSG00000077711 | AF357399 | 20 | ENSMUSG00000053253 | Ndfip2     | 9  |
| ENSMUSG00000029094 | Afap1    | 9  | ENSMUSG00000033585 | Ndn        | 20 |
| ENSMUSG00000033032 | Afap1l1  | 20 | ENSMUSG00000049001 | Ndnf       | 20 |
| ENSMUSG00000025083 | Afap1l2  | 20 | ENSMUSG00000006471 | Ndor1      | 20 |
| ENSMUSG00000068036 | Afdn     | 18 | ENSMUSG00000040138 | Ndp        | 20 |
| ENSMUSG00000029313 | Aff1     | 20 | ENSMUSG00000005125 | Ndrgr1     | 16 |
| ENSMUSG00000031189 | Aff2     | 3  | ENSMUSG00000004558 | Ndrgr2     | 1  |
| ENSMUSG00000037138 | Aff3     | 9  | ENSMUSG00000027634 | Ndrgr3     | 9  |
| ENSMUSG00000049470 | Aff4     | 2  | ENSMUSG00000036564 | Ndrgr4     | 1  |
| ENSMUSG00000038302 | Afg1l    | 20 | ENSMUSG00000054008 | Ndst1      | 3  |
| ENSMUSG00000031967 | Afg3l1   | 12 | ENSMUSG00000039308 | Ndst2      | 12 |
| ENSMUSG00000024527 | Afg3l2   | 20 | ENSMUSG00000027977 | Ndst3      | 8  |
| ENSMUSG00000017718 | Afmid    | 1  | ENSMUSG00000027971 | Ndst4      | 5  |
| ENSMUSG00000049659 | Aftph    | 20 | ENSMUSG00000016427 | Ndufa1     | 10 |
| ENSMUSG00000031521 | Aga      | 20 | ENSMUSG00000026260 | Ndufa10    | 2  |
| ENSMUSG00000055013 | Agap1    | 20 | ENSMUSG00000002379 | Ndufa11    | 12 |
| ENSMUSG00000025422 | Agap2    | 9  | ENSMUSG00000068487 | Ndufa11b   | 1  |
| ENSMUSG00000023353 | Agap3    | 20 | ENSMUSG00000020022 | Ndufa12    | 20 |
| ENSMUSG00000025754 | Agbl1    | 20 | ENSMUSG00000036199 | Ndufa13    | 12 |
| ENSMUSG00000040812 | Agbl2    | 9  | ENSMUSG00000014294 | Ndufa2     | 12 |
| ENSMUSG00000038836 | Agbl3    | 20 | ENSMUSG00000035674 | Ndufa3     | 12 |
| ENSMUSG00000061298 | Agbl4    | 20 | ENSMUSG00000029632 | Ndufa4     | 10 |
| ENSMUSG00000029165 | Agbl5    | 3  | ENSMUSG00000040280 | Ndufa4l2   | 20 |
| ENSMUSG00000015452 | Ager     | 20 | ENSMUSG00000023089 | Ndufa5     | 12 |
| ENSMUSG00000026159 | Agfg1    | 3  | ENSMUSG00000022450 | Ndufa6     | 12 |
| ENSMUSG00000029722 | Agfg2    | 1  | ENSMUSG00000041881 | Ndufa7     | 12 |
| ENSMUSG00000021681 | Aggf1    | 20 | ENSMUSG00000026895 | Ndufa8     | 20 |
| ENSMUSG00000029916 | Agk      | 20 | ENSMUSG00000000399 | Ndufa9     | 20 |
| ENSMUSG00000033400 | Ag1      | 9  | ENSMUSG00000030869 | Ndufab1    | 12 |
| ENSMUSG00000040706 | Agmat    | 20 | ENSMUSG00000091989 | Ndufab1-ps | 20 |
| ENSMUSG00000050103 | Agmo     | 9  | ENSMUSG00000027305 | Ndufaf1    | 20 |
| ENSMUSG00000041530 | Ago1     | 5  | ENSMUSG00000068184 | Ndufaf2    | 2  |
| ENSMUSG00000036698 | Ago2     | 20 | ENSMUSG00000070283 | Ndufaf3    | 20 |
| ENSMUSG00000028842 | Ago3     | 3  | ENSMUSG00000028261 | Ndufaf4    | 18 |

|                    |          |    |                    |           |    |
|--------------------|----------|----|--------------------|-----------|----|
| ENSMUSG0000042500  | Ago4     | 9  | ENSMUSG00000027384 | Ndufaf5   | 20 |
| ENSMUSG0000034254  | Agpat1   | 20 | ENSMUSG00000050323 | Ndufaf6   | 20 |
| ENSMUSG0000026922  | Agpat2   | 20 | ENSMUSG00000024082 | Ndufaf7   | 1  |
| ENSMUSG00000001211 | Agpat3   | 18 | ENSMUSG00000078572 | Ndufaf8   | 19 |
| ENSMUSG00000023827 | Agpat4   | 16 | ENSMUSG00000113902 | Ndufb1-ps | 12 |
| ENSMUSG00000031467 | Agpat5   | 3  | ENSMUSG00000040048 | Ndufb10   | 3  |
| ENSMUSG00000042410 | Agps     | 1  | ENSMUSG00000031059 | Ndufb11   | 12 |
| ENSMUSG00000041936 | Agrn     | 19 | ENSMUSG00000002416 | Ndufb2    | 12 |
| ENSMUSG00000031980 | Agt      | 6  | ENSMUSG00000026032 | Ndufb3    | 12 |
| ENSMUSG00000021557 | Agtppb1  | 12 | ENSMUSG00000022820 | Ndufb4    | 2  |
| ENSMUSG00000049115 | Agtr1a   | 1  | ENSMUSG00000083380 | Ndufb4c   | 12 |
| ENSMUSG00000068122 | Agtr2    | 6  | ENSMUSG00000027673 | Ndufb5    | 20 |
| ENSMUSG00000029007 | Agtrap   | 20 | ENSMUSG00000071014 | Ndufb6    | 12 |
| ENSMUSG00000026491 | Ahctf1   | 6  | ENSMUSG00000033938 | Ndufb7    | 12 |
| ENSMUSG00000027597 | Ahcy     | 20 | ENSMUSG00000025204 | Ndufb8    | 12 |
| ENSMUSG00000027893 | Ahcy1    | 1  | ENSMUSG00000022354 | Ndufb9    | 12 |
| ENSMUSG00000029772 | Ahcy2    | 20 | ENSMUSG00000037152 | Ndufc1    | 12 |
| ENSMUSG00000037692 | Ahdc1    | 20 | ENSMUSG00000030647 | Ndufc2    | 12 |
| ENSMUSG00000019986 | Ahi1     | 20 | ENSMUSG00000025968 | Ndufs1    | 20 |
| ENSMUSG00000069833 | Ahnak    | 20 | ENSMUSG00000013593 | Ndufs2    | 20 |
| ENSMUSG00000019256 | Ahr      | 20 | ENSMUSG00000021764 | Ndufs4    | 12 |
| ENSMUSG00000021575 | Ahrr     | 20 | ENSMUSG00000028648 | Ndufs5    | 12 |
| ENSMUSG00000021037 | Ahsa1    | 12 | ENSMUSG00000021606 | Ndufs6    | 10 |
| ENSMUSG00000020288 | Ahsa2    | 20 | ENSMUSG00000020153 | Ndufs7    | 3  |
| ENSMUSG00000035875 | AI182371 | 20 | ENSMUSG00000059734 | Ndufs8    | 12 |
| ENSMUSG00000114780 | AI197445 | 9  | ENSMUSG00000037916 | Ndufv1    | 20 |
| ENSMUSG00000062753 | AI413582 | 12 | ENSMUSG00000024099 | Ndufv2    | 12 |
| ENSMUSG00000074384 | AI429214 | 12 | ENSMUSG00000024038 | Ndufv3    | 12 |
| ENSMUSG00000045165 | AI467606 | 20 | ENSMUSG00000092274 | Neat1     | 16 |
| ENSMUSG00000090086 | AI480526 | 1  | ENSMUSG00000026950 | Neb       | 19 |
| ENSMUSG00000056145 | AI504432 | 2  | ENSMUSG00000053702 | Nebi      | 7  |
| ENSMUSG00000105987 | AI506816 | 20 | ENSMUSG00000040536 | Necab1    | 20 |
| ENSMUSG00000078307 | AI593442 | 8  | ENSMUSG00000031837 | Necab2    | 19 |
| ENSMUSG00000010290 | AI597479 | 1  | ENSMUSG00000027489 | Necab3    | 18 |
| ENSMUSG00000093738 | AI606473 | 1  | ENSMUSG00000030327 | Necap1    | 20 |
| ENSMUSG00000034382 | AI661453 | 20 | ENSMUSG00000028923 | Necap2    | 3  |
| ENSMUSG00000047423 | AI837181 | 20 | ENSMUSG00000032012 | Nectin1   | 19 |
| ENSMUSG00000097280 | AI849053 | 1  | ENSMUSG00000062300 | Nectin2   | 20 |
| ENSMUSG00000053297 | AI854703 | 18 | ENSMUSG00000022656 | Nectin3   | 5  |
| ENSMUSG00000056383 | AI987944 | 19 | ENSMUSG00000006411 | Nectin4   | 20 |
| ENSMUSG00000042901 | Aida     | 20 | ENSMUSG00000019988 | Nedd1     | 20 |
| ENSMUSG00000024397 | Aif1     | 18 | ENSMUSG00000032216 | Nedd4     | 20 |
| ENSMUSG00000001864 | Aif1l    | 20 | ENSMUSG00000024589 | Nedd4l    | 9  |
| ENSMUSG00000036932 | Aifm1    | 9  | ENSMUSG00000010376 | Nedd8     | 7  |
| ENSMUSG00000020085 | Aifm2    | 9  | ENSMUSG00000021365 | Nedd9     | 20 |
| ENSMUSG00000022763 | Aifm3    | 6  | ENSMUSG00000020396 | Nefh      | 18 |
| ENSMUSG00000019806 | Aig1     | 15 | ENSMUSG00000022055 | Nefl      | 19 |
| ENSMUSG00000037860 | Aim2     | 20 | ENSMUSG00000022054 | Nefm      | 18 |
| ENSMUSG00000028029 | Aimp1    | 12 | ENSMUSG00000040037 | Negr1     | 7  |
| ENSMUSG00000029610 | Aimp2    | 20 | ENSMUSG00000032298 | Neil1     | 20 |
| ENSMUSG00000000731 | Aire     | 20 | ENSMUSG00000035121 | Neil2     | 20 |
| ENSMUSG00000078247 | Airn     | 9  | ENSMUSG00000039396 | Neil3     | 20 |
| ENSMUSG00000039546 | Ajap1    | 3  | ENSMUSG00000031644 | Nek1      | 20 |
| ENSMUSG00000029419 | Ajm1     | 9  | ENSMUSG00000042567 | Nek10     | 20 |
| ENSMUSG00000022178 | Ajuba    | 20 | ENSMUSG00000035032 | Nek11     | 14 |

|                    |            |    |                    |          |    |
|--------------------|------------|----|--------------------|----------|----|
| ENSMUSG0000026817  | Ak1        | 18 | ENSMUSG00000031478 | Nek3     | 20 |
| ENSMUSG00000078139 | AK157302   | 20 | ENSMUSG00000021918 | Nek4     | 6  |
| ENSMUSG00000028792 | Ak2        | 20 | ENSMUSG00000037738 | Nek5     | 13 |
| ENSMUSG00000024782 | Ak3        | 1  | ENSMUSG00000026749 | Nek6     | 20 |
| ENSMUSG00000081957 | Ak3l2-ps   | 5  | ENSMUSG00000026393 | Nek7     | 3  |
| ENSMUSG00000028527 | Ak4        | 1  | ENSMUSG00000017405 | Nek8     | 20 |
| ENSMUSG00000039058 | Ak5        | 5  | ENSMUSG00000034290 | Nek9     | 12 |
| ENSMUSG00000078941 | Ak6        | 20 | ENSMUSG00000029111 | Nelfa    | 20 |
| ENSMUSG00000041323 | Ak7        | 14 | ENSMUSG00000013465 | Nelfb    | 9  |
| ENSMUSG00000026807 | Ak8        | 13 | ENSMUSG00000016253 | Nelfcd   | 20 |
| ENSMUSG00000091415 | Ak9        | 14 | ENSMUSG00000024369 | Nelfe    | 20 |
| ENSMUSG00000091636 | Akain1     | 19 | ENSMUSG00000055409 | Nell1    | 18 |
| ENSMUSG00000018428 | Akap1      | 20 | ENSMUSG00000022454 | Nell2    | 3  |
| ENSMUSG00000047804 | Akap10     | 3  | ENSMUSG00000020982 | Nempf    | 20 |
| ENSMUSG00000022016 | Akap11     | 7  | ENSMUSG00000040195 | Nemp1    | 1  |
| ENSMUSG00000038587 | Akap12     | 18 | ENSMUSG00000043015 | Nemp2    | 20 |
| ENSMUSG00000066406 | Akap13     | 1  | ENSMUSG00000037499 | Nenf     | 12 |
| ENSMUSG00000059708 | Akap17b    | 20 | ENSMUSG00000032340 | Neo1     | 18 |
| ENSMUSG00000021057 | Akap5      | 9  | ENSMUSG00000036208 | Nepro    | 1  |
| ENSMUSG00000061603 | Akap6      | 12 | ENSMUSG00000004891 | Nes      | 20 |
| ENSMUSG00000039166 | Akap7      | 6  | ENSMUSG00000021215 | Net1     | 20 |
| ENSMUSG00000024045 | Akap8      | 20 | ENSMUSG00000050321 | Neto1    | 9  |
| ENSMUSG0000002625  | Akap8l     | 1  | ENSMUSG00000036902 | Neto2    | 9  |
| ENSMUSG00000040407 | Akap9      | 9  | ENSMUSG00000007038 | Neu1     | 20 |
| ENSMUSG00000031023 | Akip1      | 20 | ENSMUSG00000079434 | Neu2     | 20 |
| ENSMUSG00000023075 | Akirin1    | 20 | ENSMUSG00000035239 | Neu3     | 20 |
| ENSMUSG00000028291 | Akirin2    | 20 | ENSMUSG00000034000 | Neu4     | 20 |
| ENSMUSG00000039158 | Akna       | 20 | ENSMUSG00000006435 | Neur1a   | 18 |
| ENSMUSG00000028692 | Akr1a1     | 7  | ENSMUSG00000034413 | Neur1b   | 1  |
| ENSMUSG00000061758 | Akr1b10    | 6  | ENSMUSG00000039873 | Neur2    | 20 |
| ENSMUSG00000001642 | Akr1b3     | 20 | ENSMUSG00000047180 | Neur3    | 10 |
| ENSMUSG00000029762 | Akr1b8     | 20 | ENSMUSG00000047284 | Neur4    | 20 |
| ENSMUSG00000033715 | Akr1c14    | 1  | ENSMUSG00000034701 | Neurod1  | 5  |
| ENSMUSG00000045410 | Akr1e1     | 1  | ENSMUSG00000038255 | Neurod2  | 1  |
| ENSMUSG00000028743 | Akr7a5     | 20 | ENSMUSG00000037984 | Neurod6  | 5  |
| ENSMUSG00000001729 | Akt1       | 20 | ENSMUSG00000046449 | Nexmif   | 3  |
| ENSMUSG00000011096 | Akt1s1     | 20 | ENSMUSG00000039103 | Nexn     | 20 |
| ENSMUSG00000004056 | Akt2       | 9  | ENSMUSG00000020716 | Nf1      | 3  |
| ENSMUSG00000084347 | Akt2-ps    | 9  | ENSMUSG00000009073 | Nf2      | 20 |
| ENSMUSG00000019699 | Akt3       | 9  | ENSMUSG00000058099 | Nfam1    | 9  |
| ENSMUSG00000031667 | Aktip      | 20 | ENSMUSG00000026442 | Nfasc    | 18 |
| ENSMUSG00000118394 | AL607088.1 | 9  | ENSMUSG00000003847 | Nfat5    | 10 |
| ENSMUSG00000118399 | AL844849.1 | 20 | ENSMUSG00000033016 | Nfatc1   | 20 |
| ENSMUSG00000028393 | Alad       | 20 | ENSMUSG00000027544 | Nfatc2   | 9  |
| ENSMUSG00000032786 | Alas1      | 3  | ENSMUSG00000030722 | Nfatc2ip | 20 |
| ENSMUSG00000025270 | Alas2      | 20 | ENSMUSG00000031902 | Nfatc3   | 20 |
| ENSMUSG00000022636 | Alcam      | 9  | ENSMUSG00000023411 | Nfatc4   | 20 |
| ENSMUSG00000007833 | Aldh16a1   | 20 | ENSMUSG00000038615 | Nfe2l1   | 20 |
| ENSMUSG00000025007 | Aldh18a1   | 20 | ENSMUSG00000015839 | Nfe2l2   | 20 |
| ENSMUSG00000053279 | Aldh1a1    | 20 | ENSMUSG00000029832 | Nfe2l3   | 1  |
| ENSMUSG00000013584 | Aldh1a2    | 20 | ENSMUSG00000028565 | Nfia     | 19 |
| ENSMUSG00000024747 | Aldh1a7    | 20 | ENSMUSG00000008575 | Nfib     | 5  |
| ENSMUSG00000035561 | Aldh1b1    | 18 | ENSMUSG00000055053 | Nfic     | 18 |
| ENSMUSG00000030088 | Aldh1l1    | 1  | ENSMUSG00000056749 | Nfil3    | 9  |
| ENSMUSG00000020256 | Aldh1l2    | 20 | ENSMUSG0000001911  | Nfix     | 5  |

|                    |           |    |                    |           |    |
|--------------------|-----------|----|--------------------|-----------|----|
| ENSMUSG0000029455  | Aldh2     | 20 | ENSMUSG0000028163  | Nfkb1     | 12 |
| ENSMUSG0000010025  | Aldh3a2   | 1  | ENSMUSG0000025225  | Nfkb2     | 20 |
| ENSMUSG0000024885  | Aldh3b1   | 20 | ENSMUSG0000021025  | Nfkbia    | 20 |
| ENSMUSG0000028737  | Aldh4a1   | 20 | ENSMUSG0000030595  | Nfkbib    | 20 |
| ENSMUSG0000035936  | Aldh5a1   | 20 | ENSMUSG0000036931  | Nfkbid    | 20 |
| ENSMUSG0000021238  | Aldh6a1   | 20 | ENSMUSG0000023947  | Nfkbie    | 20 |
| ENSMUSG0000053644  | Aldh7a1   | 20 | ENSMUSG0000042419  | Nfkbil1   | 20 |
| ENSMUSG0000037542  | Aldh8a1   | 20 | ENSMUSG0000035356  | Nfkbiz    | 9  |
| ENSMUSG0000026687  | Aldh9a1   | 9  | ENSMUSG0000042185  | Nfrkb     | 20 |
| ENSMUSG0000030695  | Aldoa     | 12 | ENSMUSG0000027618  | Nfs1      | 20 |
| ENSMUSG00000114515 | Aldoa     | 20 | ENSMUSG0000029993  | Nfu1      | 20 |
| ENSMUSG0000059343  | Aldoart1  | 10 | ENSMUSG0000028423  | Nfx1      | 9  |
| ENSMUSG0000028307  | Aldob     | 19 | ENSMUSG0000072889  | Nfxl1     | 1  |
| ENSMUSG0000017390  | Aldoc     | 18 | ENSMUSG0000020248  | Nfyb      | 18 |
| ENSMUSG0000039427  | Alg1      | 12 | ENSMUSG0000032897  | Nfyc      | 1  |
| ENSMUSG0000075470  | Alg10b    | 7  | ENSMUSG0000021032  | Ngb       | 17 |
| ENSMUSG0000063362  | Alg11     | 20 | ENSMUSG0000022204  | Ngdn      | 20 |
| ENSMUSG0000035845  | Alg12     | 18 | ENSMUSG0000026259  | Ngef      | 9  |
| ENSMUSG0000041718  | Alg13     | 20 | ENSMUSG0000027859  | Ngf       | 20 |
| ENSMUSG0000039887  | Alg14     | 20 | ENSMUSG0000000120  | Ngfr      | 19 |
| ENSMUSG0000039740  | Alg2      | 20 | ENSMUSG0000021785  | Ngly1     | 3  |
| ENSMUSG0000033809  | Alg3      | 5  | ENSMUSG0000047084  | Ngrn      | 20 |
| ENSMUSG0000036632  | Alg5      | 12 | ENSMUSG0000026162  | Nhej1     | 20 |
| ENSMUSG0000035704  | Alg8      | 20 | ENSMUSG0000048540  | Nhlh2     | 19 |
| ENSMUSG0000032059  | Alg9      | 1  | ENSMUSG0000044231  | Nhlrc1    | 20 |
| ENSMUSG0000055471  | Alk       | 18 | ENSMUSG0000025078  | Nhlrc2    | 1  |
| ENSMUSG0000079036  | Alkbh1    | 20 | ENSMUSG0000042997  | Nhlrc3    | 20 |
| ENSMUSG0000044339  | Alkbh2    | 3  | ENSMUSG0000090113  | Nhlrc4    | 18 |
| ENSMUSG0000040174  | Alkbh3    | 18 | ENSMUSG0000001056  | Nhp2      | 3  |
| ENSMUSG0000039754  | Alkbh4    | 20 | ENSMUSG0000059493  | Nhs       | 20 |
| ENSMUSG0000042650  | Alkbh5    | 12 | ENSMUSG0000039835  | Nhsl1     | 19 |
| ENSMUSG0000042831  | Alkbh6    | 12 | ENSMUSG0000079481  | Nhsl2     | 8  |
| ENSMUSG0000002661  | Alkbh7    | 12 | ENSMUSG0000032606  | Nicn1     | 20 |
| ENSMUSG0000025899  | Alkbh8    | 20 | ENSMUSG0000005397  | Nid1      | 2  |
| ENSMUSG0000063810  | Alms1     | 1  | ENSMUSG0000021806  | Nid2      | 13 |
| ENSMUSG0000090256  | Alms1-ps1 | 20 | ENSMUSG0000026036  | Nif3l1    | 1  |
| ENSMUSG0000000320  | Alox12    | 20 | ENSMUSG0000026377  | Nifk      | 20 |
| ENSMUSG0000032807  | Alox12b   | 20 | ENSMUSG00000095930 | Nim1k     | 20 |
| ENSMUSG0000025701  | Alox5     | 20 | ENSMUSG0000021068  | Nin       | 7  |
| ENSMUSG0000060063  | Alox5ap   | 20 | ENSMUSG0000037966  | Ninj1     | 20 |
| ENSMUSG0000020891  | Alox8     | 20 | ENSMUSG0000041377  | Ninj2     | 20 |
| ENSMUSG0000020892  | Aloxe3    | 20 | ENSMUSG0000068115  | Ninl      | 20 |
| ENSMUSG0000028028  | Alpk1     | 9  | ENSMUSG0000031917  | Nip7      | 9  |
| ENSMUSG0000032845  | Alpk2     | 20 | ENSMUSG0000047037  | Nipa1     | 20 |
| ENSMUSG0000038763  | Alpk3     | 20 | ENSMUSG0000030452  | Nipa2     | 20 |
| ENSMUSG0000028766  | Alpl      | 20 | ENSMUSG0000038879  | Nipal2    | 18 |
| ENSMUSG0000026024  | Als2      | 20 | ENSMUSG0000028803  | Nipal3    | 20 |
| ENSMUSG0000044037  | Als2cl    | 9  | ENSMUSG0000020411  | Nipal4    | 16 |
| ENSMUSG0000040310  | Alx4      | 9  | ENSMUSG0000022141  | Nipbl     | 2  |
| ENSMUSG0000025134  | Alyref    | 20 | ENSMUSG0000034285  | Nipsnap1  | 20 |
| ENSMUSG0000060244  | Alyref2   | 20 | ENSMUSG0000029432  | Nipsnap2  | 19 |
| ENSMUSG0000022244  | Amacr     | 20 | ENSMUSG0000015247  | Nipsnap3b | 20 |
| ENSMUSG0000040506  | Ambra1    | 20 | ENSMUSG0000021910  | Nisch     | 12 |
| ENSMUSG0000060096  | Amd-ps3   | 20 | ENSMUSG0000013997  | Nit1      | 20 |
| ENSMUSG0000075232  | Amd1      | 20 | ENSMUSG0000022751  | Nit2      | 9  |

|                   |            |    |                   |           |    |
|-------------------|------------|----|-------------------|-----------|----|
| ENSMUSG0000063953 | Amd2       | 20 | ENSMUSG0000078532 | Nkain1    | 10 |
| ENSMUSG0000036820 | Amdhd2     | 20 | ENSMUSG0000069670 | Nkain2    | 20 |
| ENSMUSG0000050332 | Amer1      | 20 | ENSMUSG0000055761 | Nkain3    | 20 |
| ENSMUSG0000021986 | Amer2      | 7  | ENSMUSG0000027574 | Nkain4    | 20 |
| ENSMUSG0000045174 | Amer3      | 20 | ENSMUSG0000016409 | Nkap      | 20 |
| ENSMUSG0000031751 | Amfr       | 20 | ENSMUSG0000059820 | Nkapd1    | 20 |
| ENSMUSG0000035262 | Amh        | 20 | ENSMUSG0000059395 | Nkapl     | 20 |
| ENSMUSG0000023047 | Amhr2      | 20 | ENSMUSG0000031661 | Nkd1      | 9  |
| ENSMUSG0000050947 | Amigo1     | 20 | ENSMUSG0000021567 | Nkd2      | 20 |
| ENSMUSG0000048218 | Amigo2     | 19 | ENSMUSG0000021772 | Nkiras1   | 7  |
| ENSMUSG0000032593 | Amigo3     | 20 | ENSMUSG0000017837 | Nkiras2   | 20 |
| ENSMUSG0000042225 | Ammecr1    | 1  | ENSMUSG0000060621 | Nkpd1     | 9  |
| ENSMUSG0000041915 | Ammecr1l   | 9  | ENSMUSG0000044149 | Nkrf      | 3  |
| ENSMUSG0000021278 | Amn        | 20 | ENSMUSG0000032525 | Nktr      | 20 |
| ENSMUSG0000068250 | Amn1       | 20 | ENSMUSG0000001496 | Nkx2-1    | 20 |
| ENSMUSG0000041688 | Amot       | 19 | ENSMUSG0000027434 | Nkx2-2    | 1  |
| ENSMUSG0000013076 | Amotl1     | 18 | ENSMUSG0000086509 | Nkx2-2os  | 20 |
| ENSMUSG0000032531 | Amotl2     | 20 | ENSMUSG0000058669 | Nkx2-9    | 20 |
| ENSMUSG0000027889 | Ampd2      | 20 | ENSMUSG0000022061 | Nkx3-1    | 19 |
| ENSMUSG0000005686 | Ampd3      | 20 | ENSMUSG0000035187 | Nkx6-1    | 1  |
| ENSMUSG0000021314 | Amph       | 19 | ENSMUSG0000041309 | Nkx6-2    | 16 |
| ENSMUSG0000032607 | Amt        | 1  | ENSMUSG0000020692 | Nle1      | 20 |
| ENSMUSG0000074264 | Amy1       | 20 | ENSMUSG0000063887 | Nlgn1     | 9  |
| ENSMUSG0000050022 | Amz1       | 9  | ENSMUSG0000051790 | Nlgn2     | 20 |
| ENSMUSG0000020610 | Amz2       | 18 | ENSMUSG0000031302 | Nlgn3     | 4  |
| ENSMUSG0000014355 | Anapc1     | 1  | ENSMUSG0000017376 | Nlk       | 6  |
| ENSMUSG0000036977 | Anapc10    | 20 | ENSMUSG0000021710 | Nln       | 20 |
| ENSMUSG0000025135 | Anapc11    | 12 | ENSMUSG0000049871 | Nlrc3     | 20 |
| ENSMUSG0000035048 | Anapc13    | 12 | ENSMUSG0000074151 | Nlrc5     | 20 |
| ENSMUSG0000030649 | Anapc15    | 2  | ENSMUSG0000049709 | Nlrp10    | 20 |
| ENSMUSG0000074780 | Anapc15-ps | 18 | ENSMUSG0000070390 | Nlrp1b    | 20 |
| ENSMUSG0000020107 | Anapc16    | 2  | ENSMUSG0000092528 | Nlrp1c-ps | 20 |
| ENSMUSG0000026965 | Anapc2     | 20 | ENSMUSG0000032691 | Nlrp3     | 20 |
| ENSMUSG0000029176 | Anapc4     | 20 | ENSMUSG0000041596 | Nlrp5-ps  | 1  |
| ENSMUSG0000029472 | Anapc5     | 12 | ENSMUSG0000038745 | Nlrp6     | 20 |
| ENSMUSG0000029466 | Anapc7     | 20 | ENSMUSG0000032109 | Nlrx1     | 20 |
| ENSMUSG0000072115 | Ang        | 20 | ENSMUSG0000025723 | Nmb       | 20 |
| ENSMUSG0000021257 | Angel1     | 20 | ENSMUSG0000019865 | Nmbr      | 9  |
| ENSMUSG0000026634 | Angel2     | 9  | ENSMUSG0000027787 | Nmd3      | 1  |
| ENSMUSG0000022309 | Angpt1     | 9  | ENSMUSG0000037601 | Nme1      | 20 |
| ENSMUSG0000031465 | Angpt2     | 18 | ENSMUSG0000020857 | Nme2      | 12 |
| ENSMUSG0000033544 | Angptl1    | 20 | ENSMUSG0000024177 | Nme4      | 20 |
| ENSMUSG0000004105 | Angptl2    | 13 | ENSMUSG0000035984 | Nme5      | 20 |
| ENSMUSG0000028553 | Angptl3    | 20 | ENSMUSG0000032478 | Nme6      | 20 |
| ENSMUSG0000002289 | Angptl4    | 20 | ENSMUSG0000026575 | Nme7      | 20 |
| ENSMUSG0000038742 | Angptl6    | 3  | ENSMUSG0000026946 | Nmi       | 20 |
| ENSMUSG0000028989 | Angptl7    | 20 | ENSMUSG0000028992 | Nmnat1    | 20 |
| ENSMUSG0000022265 | Ank        | 20 | ENSMUSG0000042751 | Nmnat2    | 18 |
| ENSMUSG0000031543 | Ank1       | 18 | ENSMUSG0000032456 | Nmnat3    | 3  |
| ENSMUSG0000032826 | Ank2       | 19 | ENSMUSG0000063445 | Nmral1    | 20 |
| ENSMUSG0000069601 | Ank3       | 20 | ENSMUSG0000037847 | Nmrk1     | 20 |
| ENSMUSG0000066510 | Ankdd1a    | 3  | ENSMUSG0000020936 | Nmt1      | 4  |
| ENSMUSG0000047117 | Ankdd1b    | 20 | ENSMUSG0000026643 | Nmt2      | 19 |
| ENSMUSG0000074771 | Ankef1     | 20 | ENSMUSG0000067786 | Nnat      | 1  |
| ENSMUSG0000047773 | Ankfn1     | 10 | ENSMUSG0000025453 | Nnt       | 20 |

|                    |          |    |                    |         |    |
|--------------------|----------|----|--------------------|---------|----|
| ENSMUSG0000020790  | Ankfy1   | 2  | ENSMUSG00000036285 | Noa1    | 20 |
| ENSMUSG0000024483  | Ankhd1   | 20 | ENSMUSG00000003848 | Nob1    | 20 |
| ENSMUSG0000040351  | Ankib1   | 14 | ENSMUSG00000095567 | Noc2l   | 3  |
| ENSMUSG0000029501  | Ankle2   | 20 | ENSMUSG00000024999 | Noc3l   | 20 |
| ENSMUSG0000034212  | Ankmy1   | 20 | ENSMUSG00000033294 | Noc4l   | 20 |
| ENSMUSG0000036188  | Ankmy2   | 20 | ENSMUSG00000023087 | Noct    | 20 |
| ENSMUSG0000021661  | Ankra2   | 20 | ENSMUSG00000038058 | Nod1    | 9  |
| ENSMUSG0000031508  | Ankrd10  | 20 | ENSMUSG00000055994 | Nod2    | 20 |
| ENSMUSG0000035569  | Ankrd11  | 1  | ENSMUSG00000048616 | Nog     | 20 |
| ENSMUSG0000034647  | Ankrd12  | 20 | ENSMUSG00000061458 | Nol10   | 1  |
| ENSMUSG0000041870  | Ankrd13a | 20 | ENSMUSG00000018433 | Nol11   | 1  |
| ENSMUSG0000037907  | Ankrd13b | 3  | ENSMUSG00000033099 | Nol12   | 20 |
| ENSMUSG0000039988  | Ankrd13c | 12 | ENSMUSG00000014776 | Nol3    | 20 |
| ENSMUSG0000005986  | Ankrd13d | 7  | ENSMUSG00000041923 | Nol4    | 18 |
| ENSMUSG0000047909  | Ankrd16  | 20 | ENSMUSG00000061411 | Nol4l   | 20 |
| ENSMUSG00000055204 | Ankrd17  | 7  | ENSMUSG00000028430 | Nol6    | 20 |
| ENSMUSG00000067653 | Ankrd23  | 20 | ENSMUSG00000063200 | Nol7    | 12 |
| ENSMUSG00000054708 | Ankrd24  | 18 | ENSMUSG00000021392 | Nol8    | 20 |
| ENSMUSG00000007827 | Ankrd26  | 20 | ENSMUSG00000028948 | Nol9    | 1  |
| ENSMUSG00000034867 | Ankrd27  | 9  | ENSMUSG00000015176 | Nolc1   | 20 |
| ENSMUSG00000014496 | Ankrd28  | 20 | ENSMUSG00000001569 | Nom1    | 20 |
| ENSMUSG00000057766 | Ankrd29  | 3  | ENSMUSG00000030835 | Nomo1   | 1  |
| ENSMUSG00000022237 | Ankrd33b | 17 | ENSMUSG00000031311 | Nono    | 20 |
| ENSMUSG00000049097 | Ankrd34a | 4  | ENSMUSG00000027133 | Nop10   | 12 |
| ENSMUSG00000045034 | Ankrd34b | 20 | ENSMUSG00000036693 | Nop14   | 9  |
| ENSMUSG00000047606 | Ankrd34c | 18 | ENSMUSG00000025869 | Nop16   | 20 |
| ENSMUSG00000038354 | Ankrd35  | 1  | ENSMUSG00000038279 | Nop2    | 20 |
| ENSMUSG00000050914 | Ankrd37  | 20 | ENSMUSG00000041560 | Nop53   | 3  |
| ENSMUSG00000079610 | Ankrd39  | 20 | ENSMUSG00000027405 | Nop56   | 20 |
| ENSMUSG00000020864 | Ankrd40  | 20 | ENSMUSG00000026020 | Nop58   | 20 |
| ENSMUSG00000041343 | Ankrd42  | 3  | ENSMUSG00000019297 | Nop9    | 20 |
| ENSMUSG00000052331 | Ankrd44  | 20 | ENSMUSG00000029361 | Nos1    | 18 |
| ENSMUSG00000044835 | Ankrd45  | 1  | ENSMUSG00000038473 | Nos1ap  | 1  |
| ENSMUSG00000048307 | Ankrd46  | 20 | ENSMUSG00000028978 | Nos3    | 20 |
| ENSMUSG00000031931 | Ankrd49  | 20 | ENSMUSG00000003421 | Nosip   | 3  |
| ENSMUSG00000044864 | Ankrd50  | 20 | ENSMUSG00000034738 | Nostrin | 20 |
| ENSMUSG00000014498 | Ankrd52  | 19 | ENSMUSG00000026923 | Notch1  | 20 |
| ENSMUSG00000033055 | Ankrd54  | 20 | ENSMUSG00000027878 | Notch2  | 13 |
| ENSMUSG00000049985 | Ankrd55  | 9  | ENSMUSG00000038146 | Notch3  | 20 |
| ENSMUSG00000040183 | Ankrd6   | 20 | ENSMUSG00000015468 | Notch4  | 20 |
| ENSMUSG00000029607 | Ankrd61  | 12 | ENSMUSG00000042988 | Notum   | 20 |
| ENSMUSG00000078137 | Ankrd63  | 9  | ENSMUSG00000053613 | Notumos | 20 |
| ENSMUSG00000096140 | Ankrd66  | 14 | ENSMUSG00000021047 | Nova1   | 3  |
| ENSMUSG00000037904 | Ankrd9   | 9  | ENSMUSG00000030411 | Nova2   | 3  |
| ENSMUSG00000024219 | Anks1    | 20 | ENSMUSG00000030562 | Nox4    | 20 |
| ENSMUSG00000058589 | Anks1b   | 9  | ENSMUSG00000019320 | Noxo1   | 20 |
| ENSMUSG00000022515 | Anks3    | 12 | ENSMUSG00000072919 | Noxred1 | 20 |
| ENSMUSG00000066191 | Anks6    | 20 | ENSMUSG00000001988 | Npas1   | 20 |
| ENSMUSG00000074591 | Ankub1   | 20 | ENSMUSG00000026077 | Npas2   | 9  |
| ENSMUSG00000026199 | Ankzf1   | 20 | ENSMUSG00000021010 | Npas3   | 18 |
| ENSMUSG00000036777 | Anln     | 15 | ENSMUSG00000045903 | Npas4   | 20 |
| ENSMUSG00000031075 | Ano1     | 20 | ENSMUSG00000033054 | Npat    | 1  |
| ENSMUSG00000037949 | Ano10    | 18 | ENSMUSG00000044034 | Npb     | 2  |
| ENSMUSG00000038115 | Ano2     | 9  | ENSMUSG00000033774 | Npbwr1  | 20 |
| ENSMUSG00000074968 | Ano3     | 9  | ENSMUSG00000024413 | Npc1    | 9  |

|                    |           |    |                    |          |    |
|--------------------|-----------|----|--------------------|----------|----|
| ENSMUSG0000035189  | Ano4      | 18 | ENSMUSG0000020447  | Npc111   | 12 |
| ENSMUSG0000055489  | Ano5      | 18 | ENSMUSG0000021242  | Npc2     | 5  |
| ENSMUSG0000064210  | Ano6      | 20 | ENSMUSG0000015094  | Npdc1    | 20 |
| ENSMUSG0000034107  | Ano7      | 20 | ENSMUSG0000039263  | Npepl1   | 20 |
| ENSMUSG0000034863  | Ano8      | 1  | ENSMUSG0000001441  | Npepps   | 20 |
| ENSMUSG0000069913  | Anp32-ps  | 20 | ENSMUSG0000020090  | Npffr1   | 20 |
| ENSMUSG0000032249  | Anp32a    | 20 | ENSMUSG0000035528  | Npffr2   | 20 |
| ENSMUSG0000028333  | Anp32b    | 20 | ENSMUSG0000027378  | Nphp1    | 20 |
| ENSMUSG0000015749  | Anp32e    | 20 | ENSMUSG0000032558  | Nphp3    | 9  |
| ENSMUSG0000039062  | Anpep     | 20 | ENSMUSG0000039577  | Nphp4    | 20 |
| ENSMUSG0000033420  | Antxr1    | 13 | ENSMUSG0000006649  | Nphs1    | 9  |
| ENSMUSG0000029338  | Antxr2    | 20 | ENSMUSG00000087009 | Nphs1os  | 20 |
| ENSMUSG0000031635  | Anxa10    | 20 | ENSMUSG00000042684 | Npl      | 20 |
| ENSMUSG0000021866  | Anxa11    | 5  | ENSMUSG00000039703 | Nploc4   | 12 |
| ENSMUSG0000032231  | Anxa2     | 20 | ENSMUSG00000057113 | Npm1     | 12 |
| ENSMUSG0000029484  | Anxa3     | 20 | ENSMUSG00000047911 | Npm2     | 20 |
| ENSMUSG0000029994  | Anxa4     | 20 | ENSMUSG00000056209 | Npm3     | 20 |
| ENSMUSG0000027712  | Anxa5     | 9  | ENSMUSG00000081669 | Npm3-ps1 | 20 |
| ENSMUSG0000018340  | Anxa6     | 20 | ENSMUSG00000040998 | Npnt     | 5  |
| ENSMUSG0000021814  | Anxa7     | 20 | ENSMUSG00000026241 | Nppc     | 20 |
| ENSMUSG0000015702  | Anxa9     | 20 | ENSMUSG00000027931 | Npr1     | 4  |
| ENSMUSG0000078651  | Aoc2      | 20 | ENSMUSG00000028469 | Npr2     | 20 |
| ENSMUSG0000019326  | Aoc3      | 20 | ENSMUSG00000022206 | Npr3     | 13 |
| ENSMUSG0000021458  | Aopep     | 20 | ENSMUSG00000010057 | Nprl2    | 20 |
| ENSMUSG0000063558  | Aox1      | 20 | ENSMUSG00000020289 | Nprl3    | 20 |
| ENSMUSG0000064294  | Aox3      | 20 | ENSMUSG00000043659 | Npsr1    | 20 |
| ENSMUSG0000038242  | Aox4      | 20 | ENSMUSG00000032336 | Nptn     | 9  |
| ENSMUSG0000074238  | Ap1ar     | 9  | ENSMUSG00000025582 | Nptx1    | 5  |
| ENSMUSG0000009090  | Ap1b1     | 9  | ENSMUSG00000059991 | Nptx2    | 20 |
| ENSMUSG0000031731  | Ap1g1     | 20 | ENSMUSG00000022421 | Nptxr    | 5  |
| ENSMUSG0000040701  | Ap1g2     | 20 | ENSMUSG00000029819 | Npy      | 3  |
| ENSMUSG0000003033  | Ap1m1     | 20 | ENSMUSG00000036437 | Npy1r    | 10 |
| ENSMUSG0000003309  | Ap1m2     | 20 | ENSMUSG00000028004 | Npy2r    | 18 |
| ENSMUSG0000004849  | Ap1s1     | 3  | ENSMUSG00000044014 | Npy5r    | 10 |
| ENSMUSG0000031367  | Ap1s2     | 20 | ENSMUSG00000003849 | Nqo1     | 9  |
| ENSMUSG0000054702  | Ap1s3     | 20 | ENSMUSG00000046949 | Nqo2     | 18 |
| ENSMUSG00000060279 | Ap2a1     | 18 | ENSMUSG00000020889 | Nr1d1    | 1  |
| ENSMUSG0000002957  | Ap2a2     | 3  | ENSMUSG00000021775 | Nr1d2    | 20 |
| ENSMUSG0000035152  | Ap2b1     | 12 | ENSMUSG00000060601 | Nr1h2    | 20 |
| ENSMUSG0000022841  | Ap2m1     | 20 | ENSMUSG00000002108 | Nr1h3    | 20 |
| ENSMUSG0000008036  | Ap2s1     | 12 | ENSMUSG00000005677 | Nr1i3    | 18 |
| ENSMUSG0000021686  | Ap3b1     | 9  | ENSMUSG00000005897 | Nr2c1    | 20 |
| ENSMUSG0000062444  | Ap3b2     | 19 | ENSMUSG00000005893 | Nr2c2    | 12 |
| ENSMUSG0000020198  | Ap3d1     | 20 | ENSMUSG00000071078 | Nr2c2ap  | 3  |
| ENSMUSG0000021824  | Ap3m1     | 20 | ENSMUSG00000019803 | Nr2e1    | 9  |
| ENSMUSG0000094683  | Ap3m1-ps  | 20 | ENSMUSG00000069171 | Nr2f1    | 18 |
| ENSMUSG0000031539  | Ap3m2     | 20 | ENSMUSG00000030551 | Nr2f2    | 18 |
| ENSMUSG0000024480  | Ap3s1     | 20 | ENSMUSG00000002393 | Nr2f6    | 18 |
| ENSMUSG0000085611  | Ap3s1-ps1 | 20 | ENSMUSG00000024431 | Nr3c1    | 18 |
| ENSMUSG0000094257  | Ap3s1-ps2 | 20 | ENSMUSG00000031618 | Nr3c2    | 4  |
| ENSMUSG0000063801  | Ap3s2     | 9  | ENSMUSG00000023034 | Nr4a1    | 20 |
| ENSMUSG0000032952  | Ap4b1     | 20 | ENSMUSG00000026826 | Nr4a2    | 20 |
| ENSMUSG0000001998  | Ap4e1     | 1  | ENSMUSG00000028341 | Nr4a3    | 20 |
| ENSMUSG0000019518  | Ap4m1     | 20 | ENSMUSG00000063972 | Nr6a1    | 20 |
| ENSMUSG0000020955  | Ap4s1     | 20 | ENSMUSG00000085201 | Nr6a1os  | 2  |



|                    |          |    |                    |          |    |
|--------------------|----------|----|--------------------|----------|----|
| ENSMUSG0000049562  | Ap5b1    | 20 | ENSMUSG00000032491 | Nradd    | 20 |
| ENSMUSG00000036291 | Ap5m1    | 20 | ENSMUSG00000049134 | Nrap     | 20 |
| ENSMUSG00000068264 | Ap5s1    | 20 | ENSMUSG00000078202 | Nrarp    | 20 |
| ENSMUSG00000039623 | Ap5z1    | 20 | ENSMUSG00000027852 | Nras     | 20 |
| ENSMUSG00000019979 | Apaf1    | 20 | ENSMUSG00000029148 | Nrbp1    | 7  |
| ENSMUSG00000024897 | Apba1    | 19 | ENSMUSG00000075590 | Nrbp2    | 7  |
| ENSMUSG00000030519 | Apba2    | 19 | ENSMUSG00000020598 | Nrcam    | 3  |
| ENSMUSG00000004931 | Apba3    | 9  | ENSMUSG00000053510 | Nrd1     | 20 |
| ENSMUSG00000037032 | Apbb1    | 20 | ENSMUSG00000021179 | Nrde2    | 20 |
| ENSMUSG00000026786 | Apbb1ip  | 20 | ENSMUSG00000042834 | Nrep     | 1  |
| ENSMUSG00000029207 | Apbb2    | 18 | ENSMUSG00000058440 | Nrf1     | 20 |
| ENSMUSG00000117679 | Apbb3    | 20 | ENSMUSG00000062991 | Nrg1     | 20 |
| ENSMUSG00000005871 | Apc      | 19 | ENSMUSG00000060275 | Nrg2     | 9  |
| ENSMUSG00000083152 | Apc-ps1  | 20 | ENSMUSG00000041014 | Nrg3     | 9  |
| ENSMUSG00000020135 | Apc2     | 18 | ENSMUSG00000032311 | Nrg4     | 20 |
| ENSMUSG00000071847 | Apcdd1   | 5  | ENSMUSG00000053310 | Nrgn     | 9  |
| ENSMUSG00000032590 | Apeh     | 20 | ENSMUSG00000048490 | Nrip1    | 9  |
| ENSMUSG00000035960 | Apex1    | 9  | ENSMUSG00000001520 | Nrip2    | 9  |
| ENSMUSG00000025269 | Apex2    | 20 | ENSMUSG00000034825 | Nrip3    | 18 |
| ENSMUSG00000015750 | Aph1a    | 9  | ENSMUSG00000059791 | Nrm      | 20 |
| ENSMUSG00000032375 | Aph1b    | 20 | ENSMUSG00000039114 | Nrn1     | 9  |
| ENSMUSG00000053040 | Aph1c    | 20 | ENSMUSG00000025810 | Nrp1     | 5  |
| ENSMUSG00000027193 | Api5     | 3  | ENSMUSG00000025969 | Nrp2     | 5  |
| ENSMUSG00000010911 | Apip     | 20 | ENSMUSG00000052384 | Nrros    | 20 |
| ENSMUSG00000030051 | Ap1f     | 13 | ENSMUSG00000048978 | Nrsn1    | 20 |
| ENSMUSG00000037010 | Ap1n     | 15 | ENSMUSG00000059361 | Nrsn2    | 20 |
| ENSMUSG00000006651 | Ap1p1    | 20 | ENSMUSG00000039481 | Nrtn     | 1  |
| ENSMUSG00000031996 | Ap1p2    | 18 | ENSMUSG00000024109 | Nrxn1    | 19 |
| ENSMUSG00000033096 | Apmap    | 20 | ENSMUSG00000066392 | Nrxn3    | 9  |
| ENSMUSG00000005681 | Apoa2    | 20 | ENSMUSG00000060739 | Nsa2     | 20 |
| ENSMUSG00000040613 | Apobec1  | 20 | ENSMUSG00000118353 | Nsa2-ps1 | 20 |
| ENSMUSG00000009585 | Apobec3  | 20 | ENSMUSG00000021488 | Nsd1     | 12 |
| ENSMUSG00000042759 | Apobr    | 20 | ENSMUSG00000057406 | Nsd2     | 20 |
| ENSMUSG00000040564 | Apoc1    | 7  | ENSMUSG00000054823 | Nsd3     | 12 |
| ENSMUSG00000022548 | Apod     | 20 | ENSMUSG00000031349 | Nsdhl    | 20 |
| ENSMUSG00000002985 | Apoe     | 3  | ENSMUSG00000034187 | Nsf      | 19 |
| ENSMUSG00000056656 | Apol8    | 9  | ENSMUSG00000027455 | Nsfl1c   | 20 |
| ENSMUSG00000090698 | Apold1   | 20 | ENSMUSG00000029126 | Nsg1     | 2  |
| ENSMUSG00000079508 | Apoo     | 20 | ENSMUSG00000020297 | Nsg2     | 18 |
| ENSMUSG00000049233 | Apoo-ps  | 9  | ENSMUSG00000062510 | Nsl1     | 1  |
| ENSMUSG00000025525 | Apool    | 20 | ENSMUSG00000028245 | Nsmaf    | 9  |
| ENSMUSG00000037787 | Apopt1   | 20 | ENSMUSG00000030750 | Nsmce1   | 3  |
| ENSMUSG00000022892 | App      | 20 | ENSMUSG00000059586 | Nsmce2   | 19 |
| ENSMUSG00000018481 | Appbp2   | 19 | ENSMUSG00000070520 | Nsmce3   | 12 |
| ENSMUSG00000085628 | Appbp2os | 20 | ENSMUSG00000040331 | Nsmce4a  | 9  |
| ENSMUSG00000040760 | Appl1    | 16 | ENSMUSG00000006476 | Nsmf     | 18 |
| ENSMUSG00000020263 | Appl2    | 18 | ENSMUSG00000037958 | Nsrp1    | 20 |
| ENSMUSG00000006589 | Aprt     | 3  | ENSMUSG00000021595 | Nsun2    | 20 |
| ENSMUSG00000110664 | Aprt-ps  | 20 | ENSMUSG00000050312 | Nsun3    | 20 |
| ENSMUSG00000028411 | Aptx     | 20 | ENSMUSG00000028706 | Nsun4    | 20 |
| ENSMUSG00000004655 | Aqp1     | 13 | ENSMUSG00000000916 | Nsun5    | 20 |
| ENSMUSG00000042797 | Aqp11    | 5  | ENSMUSG00000026707 | Nsun6    | 20 |
| ENSMUSG00000024411 | Aqp4     | 15 | ENSMUSG00000029206 | Nsun7    | 1  |
| ENSMUSG00000032204 | Aqp9     | 20 | ENSMUSG00000020736 | Nt5c     | 7  |
| ENSMUSG00000040383 | Aqr      | 7  | ENSMUSG00000054958 | Nt5c1a   | 20 |

|                    |             |    |                    |          |    |
|--------------------|-------------|----|--------------------|----------|----|
| ENSMUSG0000046532  | Ar          | 3  | ENSMUSG00000025041 | Nt5c2    | 20 |
| ENSMUSG0000001127  | Araf        | 20 | ENSMUSG00000029780 | Nt5c3    | 20 |
| ENSMUSG00000032812 | Arap1       | 20 | ENSMUSG00000017176 | Nt5c3b   | 20 |
| ENSMUSG00000037999 | Arap2       | 19 | ENSMUSG00000039480 | Nt5dc1   | 20 |
| ENSMUSG00000024451 | Arap3       | 9  | ENSMUSG00000071547 | Nt5dc2   | 19 |
| ENSMUSG00000022602 | Arc         | 20 | ENSMUSG00000054027 | Nt5dc3   | 19 |
| ENSMUSG00000032096 | Arcn1       | 2  | ENSMUSG00000032420 | Nt5e     | 20 |
| ENSMUSG00000042350 | Arel1       | 9  | ENSMUSG00000032615 | Nt5m     | 9  |
| ENSMUSG00000048076 | Arf1        | 20 | ENSMUSG00000022681 | Ntan1    | 20 |
| ENSMUSG00000062421 | Arf2        | 13 | ENSMUSG00000049107 | Ntf3     | 5  |
| ENSMUSG00000051853 | Arf3        | 9  | ENSMUSG00000041429 | Nth11    | 20 |
| ENSMUSG00000020440 | Arf5        | 20 | ENSMUSG00000059974 | Ntm      | 20 |
| ENSMUSG00000044147 | Arf6        | 9  | ENSMUSG00000026857 | Ntmt1    | 9  |
| ENSMUSG00000027575 | Arfgap1     | 20 | ENSMUSG00000020902 | Ntn1     | 20 |
| ENSMUSG00000027255 | Arfgap2     | 20 | ENSMUSG00000117406 | Ntn3     | 20 |
| ENSMUSG00000054277 | Arfgap3     | 20 | ENSMUSG00000020019 | Ntn4     | 20 |
| ENSMUSG00000067851 | Arfgef1     | 3  | ENSMUSG00000059857 | Ntng1    | 18 |
| ENSMUSG00000074582 | Arfgef2     | 3  | ENSMUSG00000035513 | Ntng2    | 20 |
| ENSMUSG00000019852 | Arfgef3     | 3  | ENSMUSG00000031851 | Ntpcr    | 20 |
| ENSMUSG00000074513 | Arfip1      | 20 | ENSMUSG00000028072 | Ntrk1    | 19 |
| ENSMUSG00000030881 | Arfip2      | 20 | ENSMUSG00000055254 | Ntrk2    | 20 |
| ENSMUSG00000038671 | Arfrp1      | 20 | ENSMUSG00000059146 | Ntrk3    | 9  |
| ENSMUSG00000021125 | Arg2        | 1  | ENSMUSG00000019890 | Nts      | 8  |
| ENSMUSG00000040459 | Arglu1      | 3  | ENSMUSG00000027568 | Ntsr1    | 17 |
| ENSMUSG00000027247 | Arhgap1     | 9  | ENSMUSG00000020591 | Ntsr2    | 1  |
| ENSMUSG00000037148 | Arhgap10    | 9  | ENSMUSG00000020032 | Nuak1    | 20 |
| ENSMUSG00000041219 | Arhgap11a   | 20 | ENSMUSG00000009772 | Nuak2    | 20 |
| ENSMUSG00000041225 | Arhgap12    | 20 | ENSMUSG00000028954 | Nub1     | 9  |
| ENSMUSG00000049744 | Arhgap15    | 10 | ENSMUSG00000022503 | Nubp1    | 20 |
| ENSMUSG00000030766 | Arhgap17    | 20 | ENSMUSG00000039183 | Nubp2    | 20 |
| ENSMUSG00000039031 | Arhgap18    | 20 | ENSMUSG00000035142 | Nubpl    | 20 |
| ENSMUSG00000025154 | Arhgap19    | 20 | ENSMUSG00000030824 | Nucb1    | 20 |
| ENSMUSG00000053199 | Arhgap20    | 9  | ENSMUSG00000030659 | Nucb2    | 18 |
| ENSMUSG00000074354 | Arhgap20os  | 20 | ENSMUSG00000026434 | Nucks1   | 18 |
| ENSMUSG00000036591 | Arhgap21    | 5  | ENSMUSG00000028851 | Nudc     | 1  |
| ENSMUSG00000063506 | Arhgap22    | 6  | ENSMUSG00000110331 | Nudc-ps1 | 20 |
| ENSMUSG00000049807 | Arhgap23    | 15 | ENSMUSG00000038736 | Nudcd1   | 18 |
| ENSMUSG00000057315 | Arhgap24    | 18 | ENSMUSG00000020328 | Nudcd2   | 20 |
| ENSMUSG00000030047 | Arhgap25    | 20 | ENSMUSG00000053838 | Nudcd3   | 20 |
| ENSMUSG00000036452 | Arhgap26    | 18 | ENSMUSG00000036639 | Nudt1    | 20 |
| ENSMUSG00000034255 | Arhgap27    | 1  | ENSMUSG00000073293 | Nudt10   | 16 |
| ENSMUSG00000085733 | Arhgap27os1 | 20 | ENSMUSG00000073295 | Nudt11   | 2  |
| ENSMUSG00000085360 | Arhgap27os2 | 20 | ENSMUSG00000024228 | Nudt12   | 3  |
| ENSMUSG00000024043 | Arhgap28    | 20 | ENSMUSG00000021809 | Nudt13   | 20 |
| ENSMUSG00000039831 | Arhgap29    | 3  | ENSMUSG00000002804 | Nudt14   | 20 |
| ENSMUSG00000048865 | Arhgap30    | 20 | ENSMUSG00000033405 | Nudt15   | 20 |
| ENSMUSG00000022799 | Arhgap31    | 20 | ENSMUSG00000032565 | Nudt16   | 20 |
| ENSMUSG00000041444 | Arhgap32    | 8  | ENSMUSG00000022516 | Nudt16l1 | 3  |
| ENSMUSG00000036882 | Arhgap33    | 19 | ENSMUSG00000028100 | Nudt17   | 1  |
| ENSMUSG00000062132 | Arhgap33os  | 20 | ENSMUSG00000045211 | Nudt18   | 20 |
| ENSMUSG00000058230 | Arhgap35    | 3  | ENSMUSG00000034875 | Nudt19   | 20 |
| ENSMUSG00000036198 | Arhgap36    | 17 | ENSMUSG00000028443 | Nudt2    | 20 |
| ENSMUSG00000033697 | Arhgap39    | 5  | ENSMUSG00000031754 | Nudt21   | 12 |
| ENSMUSG00000031389 | Arhgap4     | 20 | ENSMUSG00000037349 | Nudt22   | 20 |
| ENSMUSG00000074625 | Arhgap40    | 20 | ENSMUSG00000024213 | Nudt3    | 20 |

|                    |           |    |                    |           |    |
|--------------------|-----------|----|--------------------|-----------|----|
| ENSMUSG0000050730  | Arhgap42  | 3  | ENSMUSG0000020029  | Nudt4     | 18 |
| ENSMUSG0000033389  | Arhgap44  | 19 | ENSMUSG0000025817  | Nudt5     | 20 |
| ENSMUSG0000035697  | Arhgap45  | 20 | ENSMUSG0000050174  | Nudt6     | 20 |
| ENSMUSG0000035133  | Arhgap5   | 20 | ENSMUSG0000031767  | Nudt7     | 20 |
| ENSMUSG0000031355  | Arhgap6   | 20 | ENSMUSG00000110949 | Nudt8     | 20 |
| ENSMUSG0000078954  | Arhgap8   | 20 | ENSMUSG0000029310  | Nudt9     | 20 |
| ENSMUSG0000040345  | Arhgap9   | 20 | ENSMUSG0000026683  | Nuf2      | 20 |
| ENSMUSG0000025132  | Arhgdia   | 20 | ENSMUSG0000022009  | Nufip1    | 20 |
| ENSMUSG0000030220  | Arhgdib   | 19 | ENSMUSG0000037857  | Nufip2    | 3  |
| ENSMUSG0000073433  | Arhgdig   | 20 | ENSMUSG0000066306  | Numa1     | 1  |
| ENSMUSG0000040940  | Arhgef1   | 9  | ENSMUSG0000021224  | Numb      | 20 |
| ENSMUSG0000071176  | Arhgef10  | 15 | ENSMUSG0000063160  | Numb1     | 18 |
| ENSMUSG0000040964  | Arhgef10l | 9  | ENSMUSG0000052798  | Nup107    | 20 |
| ENSMUSG0000041977  | Arhgef11  | 18 | ENSMUSG0000039509  | Nup133    | 1  |
| ENSMUSG0000059495  | Arhgef12  | 12 | ENSMUSG0000021374  | Nup153    | 20 |
| ENSMUSG0000052921  | Arhgef15  | 20 | ENSMUSG0000022142  | Nup155    | 18 |
| ENSMUSG0000029032  | Arhgef16  | 20 | ENSMUSG0000051329  | Nup160    | 20 |
| ENSMUSG0000032875  | Arhgef17  | 9  | ENSMUSG0000052533  | Nup188    | 20 |
| ENSMUSG0000004568  | Arhgef18  | 20 | ENSMUSG0000038759  | Nup205    | 20 |
| ENSMUSG0000028919  | Arhgef19  | 20 | ENSMUSG0000030091  | Nup210    | 20 |
| ENSMUSG0000028059  | Arhgef2   | 17 | ENSMUSG0000027939  | Nup210l   | 20 |
| ENSMUSG0000019467  | Arhgef25  | 5  | ENSMUSG0000001855  | Nup214    | 20 |
| ENSMUSG0000036885  | Arhgef26  | 5  | ENSMUSG0000026999  | Nup35     | 9  |
| ENSMUSG0000021662  | Arhgef28  | 20 | ENSMUSG0000035351  | Nup37     | 20 |
| ENSMUSG0000021895  | Arhgef3   | 9  | ENSMUSG0000016619  | Nup50     | 18 |
| ENSMUSG0000054901  | Arhgef33  | 20 | ENSMUSG0000034826  | Nup54     | 20 |
| ENSMUSG0000045094  | Arhgef37  | 20 | ENSMUSG00000109511 | Nup62     | 20 |
| ENSMUSG0000051517  | Arhgef39  | 1  | ENSMUSG0000020739  | Nup85     | 20 |
| ENSMUSG0000037509  | Arhgef4   | 3  | ENSMUSG0000040667  | Nup88     | 18 |
| ENSMUSG0000004562  | Arhgef40  | 18 | ENSMUSG0000032939  | Nup93     | 9  |
| ENSMUSG0000033542  | Arhgef5   | 13 | ENSMUSG0000063550  | Nup98     | 20 |
| ENSMUSG0000031133  | Arhgef6   | 20 | ENSMUSG0000048439  | Nupl2     | 20 |
| ENSMUSG0000031511  | Arhgef7   | 20 | ENSMUSG0000030717  | Nupr1     | 12 |
| ENSMUSG0000025656  | Arhgef9   | 9  | ENSMUSG00000095789 | Nupr1l    | 20 |
| ENSMUSG0000007880  | Arid1a    | 20 | ENSMUSG0000023068  | Nus1      | 9  |
| ENSMUSG00000069729 | Arid1b    | 2  | ENSMUSG0000027306  | Nusap1    | 20 |
| ENSMUSG0000033237  | Arid2     | 2  | ENSMUSG0000008450  | Nutf2     | 10 |
| ENSMUSG0000019564  | Arid3a    | 20 | ENSMUSG0000071497  | Nutf2-ps1 | 20 |
| ENSMUSG0000004661  | Arid3b    | 1  | ENSMUSG0000026516  | Nvl       | 20 |
| ENSMUSG0000048118  | Arid4a    | 20 | ENSMUSG0000048148  | Nwd1      | 1  |
| ENSMUSG0000039219  | Arid4b    | 20 | ENSMUSG0000090061  | Nwd2      | 5  |
| ENSMUSG0000037447  | Arid5a    | 20 | ENSMUSG0000010097  | Nxf1      | 20 |
| ENSMUSG0000019947  | Arid5b    | 9  | ENSMUSG0000031410  | Nxf7      | 20 |
| ENSMUSG0000025234  | Arih1     | 2  | ENSMUSG0000020844  | Nxn       | 3  |
| ENSMUSG0000064145  | Arih2     | 20 | ENSMUSG0000075033  | Nxpe3     | 18 |
| ENSMUSG0000060904  | Arl1      | 20 | ENSMUSG0000044229  | Nxpe4     | 8  |
| ENSMUSG0000025870  | Arl10     | 20 | ENSMUSG0000046178  | Nxph1     | 19 |
| ENSMUSG0000043157  | Arl11     | 20 | ENSMUSG0000069132  | Nxph2     | 20 |
| ENSMUSG0000022911  | Arl13b    | 20 | ENSMUSG0000046719  | Nxph3     | 20 |
| ENSMUSG0000027122  | Arl14ep   | 1  | ENSMUSG0000040258  | Nxph4     | 1  |
| ENSMUSG0000042348  | Arl15     | 1  | ENSMUSG0000036992  | Nxt1      | 13 |
| ENSMUSG0000057594  | Arl16     | 20 | ENSMUSG0000042271  | Nxt2      | 18 |
| ENSMUSG0000024944  | Ari2      | 7  | ENSMUSG0000045348  | Nyap1     | 4  |
| ENSMUSG0000031776  | Ari2bp    | 18 | ENSMUSG0000054976  | Nyap2     | 18 |
| ENSMUSG0000025035  | Ari3      | 12 | ENSMUSG0000075592  | Nynrin    | 17 |

|                    |         |    |                    |              |    |
|--------------------|---------|----|--------------------|--------------|----|
| ENSMUSG0000047446  | Arl4a   | 20 | ENSMUSG00000051228 | Nyx          | 20 |
| ENSMUSG0000049866  | Arl4c   | 18 | ENSMUSG00000046610 | Oacyl        | 9  |
| ENSMUSG0000034936  | Arl4d   | 20 | ENSMUSG00000032014 | Oaf          | 9  |
| ENSMUSG0000036093  | Arl5a   | 3  | ENSMUSG00000029605 | Oas1b        | 18 |
| ENSMUSG0000017418  | Arl5b   | 18 | ENSMUSG00000001166 | Oas1c        | 20 |
| ENSMUSG0000038352  | Arl5c   | 20 | ENSMUSG00000032690 | Oas2         | 20 |
| ENSMUSG00000022722 | Arl6    | 18 | ENSMUSG00000029561 | Oasl2        | 20 |
| ENSMUSG0000030654  | Arl6ip1 | 13 | ENSMUSG00000030934 | Oat          | 20 |
| ENSMUSG00000029404 | Arl6ip4 | 20 | ENSMUSG00000035242 | Oaz1         | 12 |
| ENSMUSG00000035199 | Arl6ip5 | 13 | ENSMUSG00000043801 | Oaz1-ps      | 12 |
| ENSMUSG00000026960 | Arl6ip6 | 20 | ENSMUSG00000040652 | Oaz2         | 10 |
| ENSMUSG00000026426 | Arl8a   | 9  | ENSMUSG00000083610 | Oaz2-ps      | 20 |
| ENSMUSG00000030105 | Arl8b   | 10 | ENSMUSG00000093773 | Obox3-ps7    | 1  |
| ENSMUSG00000027599 | Armc1   | 20 | ENSMUSG00000061462 | Obscn        | 20 |
| ENSMUSG00000038525 | Armc10  | 20 | ENSMUSG00000026211 | Obsl1        | 20 |
| ENSMUSG00000071324 | Armc2   | 13 | ENSMUSG00000030450 | Oca2         | 13 |
| ENSMUSG00000037683 | Armc3   | 20 | ENSMUSG00000002396 | Ocel1        | 18 |
| ENSMUSG00000061802 | Armc4   | 20 | ENSMUSG00000029152 | Ociad1       | 9  |
| ENSMUSG00000042178 | Armc5   | 20 | ENSMUSG00000029153 | Ociad2       | 9  |
| ENSMUSG00000002343 | Armc6   | 16 | ENSMUSG00000021638 | Ocln         | 20 |
| ENSMUSG00000057219 | Armc7   | 9  | ENSMUSG00000001173 | Ocrl         | 20 |
| ENSMUSG00000032468 | Armc8   | 20 | ENSMUSG00000011179 | Odc1         | 3  |
| ENSMUSG00000062590 | Armc9   | 3  | ENSMUSG00000026790 | Odf2         | 1  |
| ENSMUSG00000033460 | Armcx1  | 9  | ENSMUSG00000028256 | Odf2l        | 20 |
| ENSMUSG00000033436 | Armcx2  | 3  | ENSMUSG00000047394 | Odf3b        | 20 |
| ENSMUSG00000049047 | Armcx3  | 4  | ENSMUSG00000032921 | Odf4         | 1  |
| ENSMUSG00000049804 | Armcx4  | 9  | ENSMUSG00000006010 | Odr4         | 1  |
| ENSMUSG00000072969 | Armcx5  | 1  | ENSMUSG00000040586 | Ofd1         | 20 |
| ENSMUSG00000050394 | Armcx6  | 20 | ENSMUSG00000025220 | Oga          | 7  |
| ENSMUSG00000060268 | Armh1   | 20 | ENSMUSG00000020456 | Ogdh         | 12 |
| ENSMUSG00000039901 | Armh3   | 20 | ENSMUSG00000021913 | Ogdhl        | 20 |
| ENSMUSG00000036242 | Armh4   | 19 | ENSMUSG00000033009 | Ogfod1       | 20 |
| ENSMUSG00000061759 | Armt1   | 12 | ENSMUSG00000023707 | Ogfod2       | 20 |
| ENSMUSG00000015522 | Arnt    | 20 | ENSMUSG00000025169 | Ogfod3       | 20 |
| ENSMUSG00000015709 | Arnt2   | 9  | ENSMUSG00000049401 | Ogfr         | 20 |
| ENSMUSG00000055116 | Arntl   | 6  | ENSMUSG00000026158 | Ogfrl1       | 18 |
| ENSMUSG00000040187 | Arntl2  | 5  | ENSMUSG00000030271 | Ogg1         | 20 |
| ENSMUSG00000029621 | Arpc1a  | 12 | ENSMUSG00000021390 | Ogn          | 20 |
| ENSMUSG00000029622 | Arpc1b  | 20 | ENSMUSG00000034160 | Ogt          | 20 |
| ENSMUSG00000006304 | Arpc2   | 9  | ENSMUSG00000072980 | Oip5         | 20 |
| ENSMUSG00000029465 | Arpc3   | 12 | ENSMUSG00000085438 | Oip5os1      | 20 |
| ENSMUSG00000079426 | Arpc4   | 20 | ENSMUSG00000027108 | Ola1         | 9  |
| ENSMUSG00000008475 | Arpc5   | 4  | ENSMUSG00000026833 | Olfm1        | 5  |
| ENSMUSG00000026755 | Arpc5l  | 2  | ENSMUSG00000032172 | Olfm2        | 9  |
| ENSMUSG00000039043 | Arpin   | 20 | ENSMUSG00000027965 | Olfm3        | 9  |
| ENSMUSG00000007656 | Arpp19  | 9  | ENSMUSG00000022026 | Olfm4        | 20 |
| ENSMUSG00000032503 | Arpp21  | 9  | ENSMUSG00000051041 | Olfm1        | 20 |
| ENSMUSG00000060890 | Arr3    | 9  | ENSMUSG00000046618 | Olfm2a       | 20 |
| ENSMUSG00000018909 | Arrb1   | 1  | ENSMUSG00000038463 | Olfm2b       | 5  |
| ENSMUSG00000060216 | Arrb2   | 20 | ENSMUSG00000027848 | Olfm3        | 16 |
| ENSMUSG00000026972 | Arrdc1  | 9  | ENSMUSG00000108218 | Olfr1372-ps1 | 20 |
| ENSMUSG00000074794 | Arrdc3  | 20 | ENSMUSG00000101750 | Olfr1392     | 20 |
| ENSMUSG00000042659 | Arrdc4  | 20 | ENSMUSG00000059864 | Olfr1393     | 19 |
| ENSMUSG00000022620 | Arsa    | 18 | ENSMUSG00000096169 | Olfr1564     | 20 |
| ENSMUSG00000042082 | Arsb    | 1  | ENSMUSG00000043385 | Olfr267      | 20 |

|                    |         |    |                    |         |    |
|--------------------|---------|----|--------------------|---------|----|
| ENSMUSG0000020604  | Arsg    | 1  | ENSMUSG00000090129 | Olfr287 | 20 |
| ENSMUSG0000046561  | Arsj    | 19 | ENSMUSG00000093942 | Olfr46  | 5  |
| ENSMUSG0000021592  | Arsk    | 20 | ENSMUSG00000070421 | Olfr658 | 20 |
| ENSMUSG0000034842  | Art3    | 20 | ENSMUSG00000050266 | Olfr690 | 20 |
| ENSMUSG0000028539  | Artn    | 20 | ENSMUSG00000043948 | Olfr691 | 20 |
| ENSMUSG0000031982  | Arv1    | 20 | ENSMUSG00000061039 | Olfr920 | 20 |
| ENSMUSG0000000325  | Arvcf   | 20 | ENSMUSG00000046160 | Olig1   | 15 |
| ENSMUSG00000035277 | Arx     | 19 | ENSMUSG00000039830 | Olig2   | 20 |
| ENSMUSG00000048355 | Arxes1  | 1  | ENSMUSG00000035069 | Oma1    | 20 |
| ENSMUSG00000048040 | Arxes2  | 20 | ENSMUSG00000049612 | Omg     | 1  |
| ENSMUSG00000003559 | As3mt   | 20 | ENSMUSG00000074006 | Omp     | 20 |
| ENSMUSG00000031591 | Asah1   | 20 | ENSMUSG00000043013 | Onecut1 | 1  |
| ENSMUSG00000024887 | Asah2   | 20 | ENSMUSG00000045991 | Onecut2 | 2  |
| ENSMUSG00000022377 | Asap1   | 3  | ENSMUSG00000038084 | Opa1    | 7  |
| ENSMUSG00000052632 | Asap2   | 18 | ENSMUSG00000052214 | Opa3    | 20 |
| ENSMUSG00000036995 | Asap3   | 1  | ENSMUSG00000050121 | Opalin  | 16 |
| ENSMUSG00000026311 | Asb1    | 20 | ENSMUSG00000062257 | Opcml   | 5  |
| ENSMUSG00000031382 | Asb11   | 19 | ENSMUSG00000031214 | Ophn1   | 9  |
| ENSMUSG00000033781 | Asb13   | 18 | ENSMUSG00000022562 | Oplah   | 4  |
| ENSMUSG00000034768 | Asb16   | 9  | ENSMUSG00000026525 | Opn3    | 18 |
| ENSMUSG00000067081 | Asb18   | 20 | ENSMUSG00000050511 | Oprd1   | 9  |
| ENSMUSG00000021200 | Asb2    | 20 | ENSMUSG00000025905 | Oprk1   | 6  |
| ENSMUSG00000020305 | Asb3    | 9  | ENSMUSG00000027584 | Oprl1   | 9  |
| ENSMUSG00000042607 | Asb4    | 20 | ENSMUSG00000000766 | Oprm1   | 3  |
| ENSMUSG00000031519 | Asb5    | 20 | ENSMUSG00000010311 | Optc    | 20 |
| ENSMUSG00000039483 | Asb6    | 20 | ENSMUSG00000026672 | Optn    | 18 |
| ENSMUSG00000030509 | Asb7    | 20 | ENSMUSG00000049686 | Orai1   | 20 |
| ENSMUSG00000048175 | Asb8    | 20 | ENSMUSG00000039747 | Orai2   | 18 |
| ENSMUSG00000044475 | Ascc1   | 20 | ENSMUSG00000043964 | Orai3   | 18 |
| ENSMUSG00000020412 | Ascc2   | 20 | ENSMUSG00000026037 | Orc2    | 1  |
| ENSMUSG00000038774 | Ascc3   | 7  | ENSMUSG00000040044 | Orc3    | 20 |
| ENSMUSG00000020052 | Ascl1   | 20 | ENSMUSG00000026761 | Orc4    | 1  |
| ENSMUSG00000019857 | Asf1a   | 20 | ENSMUSG00000029012 | Orc5    | 20 |
| ENSMUSG00000005470 | Asf1b   | 20 | ENSMUSG00000031697 | Orc6    | 20 |
| ENSMUSG00000028053 | Ash1l   | 9  | ENSMUSG00000026097 | Ormdl1  | 20 |
| ENSMUSG00000031575 | Ash2l   | 20 | ENSMUSG00000025353 | Ormdl2  | 19 |
| ENSMUSG00000023017 | Asic1   | 9  | ENSMUSG00000038150 | Ormdl3  | 20 |
| ENSMUSG00000020704 | Asic2   | 18 | ENSMUSG00000040462 | Os9     | 20 |
| ENSMUSG00000038276 | Asic3   | 20 | ENSMUSG00000024687 | Osbp    | 20 |
| ENSMUSG00000033007 | Asic4   | 9  | ENSMUSG00000020435 | Osbp2   | 9  |
| ENSMUSG00000025533 | Asl     | 20 | ENSMUSG00000040875 | Osbpl10 | 20 |
| ENSMUSG00000052456 | Asna1   | 12 | ENSMUSG00000022807 | Osbpl11 | 20 |
| ENSMUSG00000029752 | Asns    | 9  | ENSMUSG00000044252 | Osbpl1a | 18 |
| ENSMUSG00000026095 | Asnsd1  | 20 | ENSMUSG00000039050 | Osbpl2  | 18 |
| ENSMUSG00000020774 | Aspa    | 16 | ENSMUSG00000029822 | Osbpl3  | 19 |
| ENSMUSG00000038704 | Aspdh   | 20 | ENSMUSG00000037606 | Osbpl5  | 9  |
| ENSMUSG00000037686 | Aspg    | 20 | ENSMUSG00000042359 | Osbpl6  | 19 |
| ENSMUSG00000028207 | Asph    | 20 | ENSMUSG00000038534 | Osbpl7  | 16 |
| ENSMUSG00000046378 | Asphd1  | 20 | ENSMUSG00000020189 | Osbpl8  | 9  |
| ENSMUSG00000029348 | Asphd2  | 9  | ENSMUSG00000028559 | Osbpl9  | 20 |
| ENSMUSG00000033952 | Aspm    | 20 | ENSMUSG00000054594 | Oscar   | 20 |
| ENSMUSG00000021388 | Aspn    | 20 | ENSMUSG00000042616 | Oscp1   | 20 |
| ENSMUSG00000033508 | Asprv1  | 18 | ENSMUSG00000035399 | Oser1   | 9  |
| ENSMUSG00000025142 | Aspscr1 | 7  | ENSMUSG00000006289 | Osgep   | 3  |
| ENSMUSG00000024654 | Asrgl1  | 1  | ENSMUSG00000026096 | Osgep1  | 20 |

|                   |          |    |                   |         |    |
|-------------------|----------|----|-------------------|---------|----|
| ENSMUSG0000076441 | Ass1     | 1  | ENSMUSG0000074063 | Osgin1  | 20 |
| ENSMUSG0000032567 | Aste1    | 20 | ENSMUSG0000041153 | Osgin2  | 20 |
| ENSMUSG0000026587 | Astn1    | 12 | ENSMUSG0000022146 | Osmr    | 20 |
| ENSMUSG0000028373 | Astn2    | 18 | ENSMUSG0000038803 | Ost4    | 20 |
| ENSMUSG0000042548 | Asxl1    | 20 | ENSMUSG0000041084 | Ostc    | 19 |
| ENSMUSG0000037486 | Asxl2    | 2  | ENSMUSG0000024725 | Ostf1   | 20 |
| ENSMUSG0000045215 | Asxl3    | 9  | ENSMUSG0000038280 | Ostm1   | 20 |
| ENSMUSG0000013662 | Atad1    | 20 | ENSMUSG0000034990 | Otoa    | 20 |
| ENSMUSG0000052812 | Atad2b   | 3  | ENSMUSG0000062372 | Otof    | 20 |
| ENSMUSG0000029036 | Atad3a   | 20 | ENSMUSG0000091455 | Otogl   | 18 |
| ENSMUSG0000054514 | Atad3aos | 12 | ENSMUSG0000021685 | Otp     | 20 |
| ENSMUSG0000017550 | Atad5    | 20 | ENSMUSG0000024767 | Otub1   | 20 |
| ENSMUSG0000024426 | Atat1    | 20 | ENSMUSG0000021203 | Otub2   | 9  |
| ENSMUSG0000034958 | Atcay    | 20 | ENSMUSG0000043415 | Otud1   | 20 |
| ENSMUSG0000085779 | Atcayos  | 20 | ENSMUSG0000041161 | Otud3   | 20 |
| ENSMUSG0000030850 | Ate1     | 2  | ENSMUSG0000036990 | Otud4   | 9  |
| ENSMUSG0000023027 | Atf1     | 20 | ENSMUSG0000031154 | Otud5   | 20 |
| ENSMUSG0000080968 | Atf1-ps  | 20 | ENSMUSG0000040550 | Otud6b  | 20 |
| ENSMUSG0000027104 | Atf2     | 20 | ENSMUSG0000033510 | Otud7a  | 20 |
| ENSMUSG0000026628 | Atf3     | 20 | ENSMUSG0000038495 | Otud7b  | 15 |
| ENSMUSG0000042406 | Atf4     | 18 | ENSMUSG0000046034 | Otulin  | 20 |
| ENSMUSG0000038539 | Atf5     | 20 | ENSMUSG0000056069 | Otulinl | 9  |
| ENSMUSG0000026663 | Atf6     | 9  | ENSMUSG0000005917 | Otx1    | 9  |
| ENSMUSG0000015461 | Atf6b    | 20 | ENSMUSG0000021848 | Otx2    | 13 |
| ENSMUSG0000099083 | Atf7     | 10 | ENSMUSG0000098682 | Otx2os1 | 13 |
| ENSMUSG0000030213 | Atf7ip   | 9  | ENSMUSG0000038268 | Ovca2   | 20 |
| ENSMUSG0000021619 | Atg10    | 12 | ENSMUSG0000074340 | Ovgp1   | 6  |
| ENSMUSG0000037204 | Atg101   | 20 | ENSMUSG0000000959 | Oxa1l   | 20 |
| ENSMUSG0000032905 | Atg12    | 20 | ENSMUSG0000022186 | Oxct1   | 1  |
| ENSMUSG0000027244 | Atg13    | 20 | ENSMUSG0000044819 | Oxgr1   | 20 |
| ENSMUSG0000037526 | Atg14    | 9  | ENSMUSG0000039670 | Oxld1   | 3  |
| ENSMUSG0000026289 | Atg16l1  | 20 | ENSMUSG0000021906 | Oxnad1  | 9  |
| ENSMUSG0000047767 | Atg16l2  | 20 | ENSMUSG0000022307 | Oxr1    | 18 |
| ENSMUSG0000041341 | Atg2b    | 3  | ENSMUSG0000021786 | Oxsm    | 20 |
| ENSMUSG0000022663 | Atg3     | 20 | ENSMUSG0000036737 | Oxsr1   | 20 |
| ENSMUSG0000087119 | Atg4a-ps | 20 | ENSMUSG0000049112 | Oxtr    | 20 |
| ENSMUSG0000026280 | Atg4b    | 18 | ENSMUSG0000027071 | P2rx3   | 1  |
| ENSMUSG0000028550 | Atg4c    | 20 | ENSMUSG0000029470 | P2rx4   | 1  |
| ENSMUSG000002820  | Atg4d    | 4  | ENSMUSG0000005950 | P2rx5   | 20 |
| ENSMUSG0000038160 | Atg5     | 20 | ENSMUSG0000022758 | P2rx6   | 20 |
| ENSMUSG0000030314 | Atg7     | 9  | ENSMUSG0000029468 | P2rx7   | 9  |
| ENSMUSG0000033124 | Atg9a    | 9  | ENSMUSG0000027765 | P2ry1   | 20 |
| ENSMUSG0000038295 | Atg9b    | 20 | ENSMUSG0000054293 | P2ry10b | 20 |
| ENSMUSG0000026192 | Atic     | 20 | ENSMUSG0000036353 | P2ry12  | 11 |
| ENSMUSG0000021066 | Atl1     | 1  | ENSMUSG0000036362 | P2ry13  | 20 |
| ENSMUSG0000059811 | Atl2     | 8  | ENSMUSG0000036381 | P2ry14  | 20 |
| ENSMUSG0000024759 | Atl3     | 20 | ENSMUSG0000032860 | P2ry2   | 20 |
| ENSMUSG0000034218 | Atm      | 12 | ENSMUSG0000048779 | P2ry6   | 20 |
| ENSMUSG0000047388 | Atmin    | 20 | ENSMUSG0000028641 | P3h1    | 20 |
| ENSMUSG0000004263 | Atn1     | 20 | ENSMUSG0000038168 | P3h2    | 13 |
| ENSMUSG0000036816 | Atoh7    | 20 | ENSMUSG0000023191 | P3h3    | 2  |
| ENSMUSG0000037621 | Atoh8    | 20 | ENSMUSG0000006931 | P3h4    | 20 |
| ENSMUSG0000018585 | Atox1    | 12 | ENSMUSG0000019916 | P4ha1   | 9  |
| ENSMUSG0000025324 | Atp10a   | 20 | ENSMUSG0000018906 | P4ha2   | 9  |
| ENSMUSG0000055415 | Atp10b   | 15 | ENSMUSG0000051048 | P4ha3   | 20 |

|                    |             |    |                    |              |    |
|--------------------|-------------|----|--------------------|--------------|----|
| ENSMUSG0000046808  | Atp10d      | 20 | ENSMUSG00000025130 | P4hb         | 20 |
| ENSMUSG00000031441 | Atp11a      | 9  | ENSMUSG00000006675 | P4htm        | 12 |
| ENSMUSG00000037400 | Atp11b      | 20 | ENSMUSG00000025364 | Pa2g4        | 20 |
| ENSMUSG00000062949 | Atp11c      | 20 | ENSMUSG00000022283 | Pabpc1       | 9  |
| ENSMUSG00000031862 | Atp13a1     | 1  | ENSMUSG00000054582 | Pabpc1l      | 12 |
| ENSMUSG00000036622 | Atp13a2     | 3  | ENSMUSG00000084842 | Pabpc1l2b-ps | 19 |
| ENSMUSG00000022533 | Atp13a3     | 20 | ENSMUSG00000011257 | Pabpc4       | 1  |
| ENSMUSG00000038094 | Atp13a4     | 20 | ENSMUSG00000090919 | Pabpc4l      | 20 |
| ENSMUSG00000048939 | Atp13a5     | 20 | ENSMUSG00000034732 | Pabpc5       | 20 |
| ENSMUSG00000033161 | Atp1a1      | 18 | ENSMUSG00000022194 | Pabpn1       | 9  |
| ENSMUSG00000007097 | Atp1a2      | 18 | ENSMUSG00000026627 | Pacc1        | 20 |
| ENSMUSG00000040907 | Atp1a3      | 18 | ENSMUSG00000037196 | Pacrg        | 10 |
| ENSMUSG00000026576 | Atp1b1      | 9  | ENSMUSG00000024855 | Pacs1        | 20 |
| ENSMUSG00000041329 | Atp1b2      | 18 | ENSMUSG00000021143 | Pacs2        | 16 |
| ENSMUSG00000032412 | Atp1b3      | 1  | ENSMUSG00000040276 | Pacsin1      | 20 |
| ENSMUSG00000025436 | Atp23       | 6  | ENSMUSG00000016664 | Pacsin2      | 16 |
| ENSMUSG00000030730 | Atp2a1      | 18 | ENSMUSG00000027257 | Pacsin3      | 20 |
| ENSMUSG00000029467 | Atp2a2      | 18 | ENSMUSG00000028927 | Padi2        | 16 |
| ENSMUSG00000020788 | Atp2a3      | 20 | ENSMUSG00000003437 | Paf1         | 20 |
| ENSMUSG00000019943 | Atp2b1      | 9  | ENSMUSG00000020745 | Pafah1b1     | 3  |
| ENSMUSG00000030302 | Atp2b2      | 8  | ENSMUSG00000097041 | Pafah1b1-ps1 | 20 |
| ENSMUSG00000031376 | Atp2b3      | 13 | ENSMUSG00000003131 | Pafah1b2     | 3  |
| ENSMUSG00000026463 | Atp2b4      | 20 | ENSMUSG00000005447 | Pafah1b3     | 20 |
| ENSMUSG00000032570 | Atp2c1      | 2  | ENSMUSG00000037366 | Pafah2       | 20 |
| ENSMUSG00000025428 | Atp5a1      | 20 | ENSMUSG00000027508 | Pag1         | 9  |
| ENSMUSG00000025393 | Atp5b       | 2  | ENSMUSG00000029247 | Paics        | 2  |
| ENSMUSG00000025781 | Atp5c1      | 12 | ENSMUSG00000025451 | Paip1        | 19 |
| ENSMUSG00000114809 | Atp5c1-ps   | 20 | ENSMUSG00000037058 | Paip2        | 20 |
| ENSMUSG0000003072  | Atp5d       | 20 | ENSMUSG00000045896 | Paip2b       | 1  |
| ENSMUSG00000016252 | Atp5e       | 12 | ENSMUSG00000030774 | Pak1         | 9  |
| ENSMUSG00000000563 | Atp5f1      | 20 | ENSMUSG00000038683 | Pak1ip1      | 20 |
| ENSMUSG00000006057 | Atp5g1      | 5  | ENSMUSG00000022781 | Pak2         | 20 |
| ENSMUSG00000062683 | Atp5g2      | 20 | ENSMUSG00000031284 | Pak3         | 1  |
| ENSMUSG00000018770 | Atp5g3      | 5  | ENSMUSG00000030602 | Pak4         | 20 |
| ENSMUSG00000034566 | Atp5h       | 12 | ENSMUSG00000074923 | Pak6         | 18 |
| ENSMUSG00000022890 | Atp5j       | 12 | ENSMUSG00000039913 | Pak7         | 20 |
| ENSMUSG00000038690 | Atp5j2      | 12 | ENSMUSG00000038729 | Pakap        | 18 |
| ENSMUSG00000050856 | Atp5k       | 10 | ENSMUSG00000090053 | Pakap        | 9  |
| ENSMUSG00000081700 | Atp5k-ps2   | 20 | ENSMUSG00000089945 | Pakap        | 20 |
| ENSMUSG00000038717 | Atp5l       | 19 | ENSMUSG00000044702 | Palb2        | 20 |
| ENSMUSG00000084168 | Atp5l2-ps   | 20 | ENSMUSG00000020092 | Pald1        | 20 |
| ENSMUSG00000071528 | Atp5md      | 12 | ENSMUSG00000058056 | Palld        | 18 |
| ENSMUSG00000021290 | Atp5mpl     | 12 | ENSMUSG00000035863 | Palm         | 9  |
| ENSMUSG00000022956 | Atp5o       | 12 | ENSMUSG00000047986 | Palm3        | 20 |
| ENSMUSG00000019087 | Atp6ap1     | 9  | ENSMUSG00000033377 | Palmd        | 20 |
| ENSMUSG00000078958 | Atp6ap1l    | 9  | ENSMUSG00000026335 | Pam          | 2  |
| ENSMUSG00000031007 | Atp6ap2     | 9  | ENSMUSG00000014301 | Pam16        | 12 |
| ENSMUSG00000019302 | Atp6v0a1    | 1  | ENSMUSG00000027188 | Pamr1        | 17 |
| ENSMUSG00000038023 | Atp6v0a2    | 20 | ENSMUSG00000005682 | Pan2         | 20 |
| ENSMUSG00000033379 | Atp6v0b     | 12 | ENSMUSG00000029647 | Pan3         | 20 |
| ENSMUSG00000024121 | Atp6v0c     | 10 | ENSMUSG00000097814 | Panct2       | 20 |
| ENSMUSG00000080242 | Atp6v0c-ps2 | 20 | ENSMUSG00000033610 | Pank1        | 18 |
| ENSMUSG00000013160 | Atp6v0d1    | 20 | ENSMUSG00000037514 | Pank2        | 20 |
| ENSMUSG00000015575 | Atp6v0e     | 20 | ENSMUSG00000018846 | Pank3        | 19 |
| ENSMUSG00000039347 | Atp6v0e2    | 20 | ENSMUSG00000029056 | Pank4        | 20 |

|                    |          |    |                    |        |    |
|--------------------|----------|----|--------------------|--------|----|
| ENSMUSG0000052459  | Atp6v1a  | 19 | ENSMUSG0000060424  | Pantr1 | 3  |
| ENSMUSG0000006273  | Atp6v1b2 | 3  | ENSMUSG00000097063 | Pantr2 | 20 |
| ENSMUSG00000022295 | Atp6v1c1 | 20 | ENSMUSG00000031934 | Panx1  | 18 |
| ENSMUSG00000020566 | Atp6v1c2 | 3  | ENSMUSG00000058441 | Panx2  | 18 |
| ENSMUSG00000021114 | Atp6v1d  | 19 | ENSMUSG00000025464 | Paqx   | 12 |
| ENSMUSG00000019210 | Atp6v1e1 | 12 | ENSMUSG00000021223 | Papln  | 1  |
| ENSMUSG00000004285 | Atp6v1f  | 12 | ENSMUSG00000021111 | Papola | 9  |
| ENSMUSG00000039105 | Atp6v1g1 | 12 | ENSMUSG00000074817 | Papolb | 20 |
| ENSMUSG00000024403 | Atp6v1g2 | 20 | ENSMUSG00000020273 | Papolg | 20 |
| ENSMUSG00000033793 | Atp6v1h  | 20 | ENSMUSG00000028370 | Pappa  | 20 |
| ENSMUSG00000033792 | Atp7a    | 20 | ENSMUSG00000028032 | Papss1 | 12 |
| ENSMUSG00000006567 | Atp7b    | 18 | ENSMUSG00000024899 | Papss2 | 9  |
| ENSMUSG00000037685 | Atp8a1   | 7  | ENSMUSG00000055725 | Paqr3  | 20 |
| ENSMUSG00000021983 | Atp8a2   | 18 | ENSMUSG00000023909 | Paqr4  | 20 |
| ENSMUSG00000039529 | Atp8b1   | 20 | ENSMUSG00000032278 | Paqr5  | 1  |
| ENSMUSG00000060671 | Atp8b2   | 20 | ENSMUSG00000041423 | Paqr6  | 20 |
| ENSMUSG00000028457 | Atp8b5   | 20 | ENSMUSG00000037348 | Paqr7  | 9  |
| ENSMUSG00000027546 | Atp9a    | 1  | ENSMUSG00000025931 | Paqr8  | 12 |
| ENSMUSG00000024566 | Atp9b    | 7  | ENSMUSG00000064225 | Paqr9  | 9  |
| ENSMUSG00000028710 | Atpaf1   | 18 | ENSMUSG00000025812 | Pard3  | 9  |
| ENSMUSG00000042709 | Atpaf2   | 20 | ENSMUSG00000052062 | Pard3b | 20 |
| ENSMUSG00000054428 | Atpif1   | 12 | ENSMUSG00000005699 | Pard6a | 20 |
| ENSMUSG00000039065 | Atpsckmt | 20 | ENSMUSG00000044641 | Pard6b | 9  |
| ENSMUSG00000032409 | Atr      | 2  | ENSMUSG00000056214 | Pard6g | 20 |
| ENSMUSG00000013622 | Atraid   | 1  | ENSMUSG00000021911 | Parg   | 12 |
| ENSMUSG00000025646 | Atrip    | 20 | ENSMUSG00000028964 | Park7  | 12 |
| ENSMUSG00000027312 | Atrn     | 12 | ENSMUSG00000033918 | Parl   | 20 |
| ENSMUSG00000054843 | Atrnl1   | 18 | ENSMUSG00000034981 | Parm1  | 20 |
| ENSMUSG00000031229 | Atrx     | 2  | ENSMUSG00000022685 | Parn   | 20 |
| ENSMUSG00000046876 | Atxn1    | 7  | ENSMUSG00000026496 | Parp1  | 20 |
| ENSMUSG00000016541 | Atxn10   | 20 | ENSMUSG00000063268 | Parp10 | 20 |
| ENSMUSG00000069895 | Atxn1l   | 20 | ENSMUSG00000037997 | Parp11 | 20 |
| ENSMUSG00000042605 | Atxn2    | 3  | ENSMUSG00000038507 | Parp12 | 9  |
| ENSMUSG00000032637 | Atxn2l   | 20 | ENSMUSG00000034422 | Parp14 | 20 |
| ENSMUSG00000021189 | Atxn3    | 16 | ENSMUSG00000032392 | Parp16 | 19 |
| ENSMUSG00000021738 | Atxn7    | 20 | ENSMUSG00000036023 | Parp2  | 20 |
| ENSMUSG00000020564 | Atxn7l1  | 4  | ENSMUSG00000023249 | Parp3  | 20 |
| ENSMUSG00000048997 | Atxn7l2  | 20 | ENSMUSG00000054509 | Parp4  | 20 |
| ENSMUSG00000059995 | Atxn7l3  | 18 | ENSMUSG00000025237 | Parp6  | 9  |
| ENSMUSG00000074748 | Atxn7l3b | 12 | ENSMUSG00000021725 | Parp8  | 9  |
| ENSMUSG00000097415 | AU020206 | 20 | ENSMUSG00000022906 | Parp9  | 20 |
| ENSMUSG00000051669 | AU021092 | 20 | ENSMUSG00000035365 | Parpbp | 18 |
| ENSMUSG00000078584 | AU022252 | 12 | ENSMUSG00000043572 | Pars2  | 9  |
| ENSMUSG00000073294 | AU022751 | 20 | ENSMUSG00000030770 | Parva  | 18 |
| ENSMUSG00000097209 | AU022754 | 5  | ENSMUSG00000022438 | Parvb  | 6  |
| ENSMUSG00000109890 | AU023762 | 6  | ENSMUSG00000022439 | Parvg  | 20 |
| ENSMUSG00000028830 | AU040320 | 1  | ENSMUSG00000026274 | Pask   | 20 |
| ENSMUSG00000091523 | AU040972 | 20 | ENSMUSG00000074452 | Pate2  | 20 |
| ENSMUSG00000078435 | AU041133 | 20 | ENSMUSG00000061859 | Patj   | 18 |
| ENSMUSG00000021460 | Auh      | 20 | ENSMUSG00000046139 | Patl1  | 20 |
| ENSMUSG00000068328 | Aup1     | 20 | ENSMUSG00000020453 | Patz1  | 20 |
| ENSMUSG00000027496 | Aurka    | 20 | ENSMUSG00000035873 | Pawr   | 20 |
| ENSMUSG00000065990 | Aurkaip1 | 20 | ENSMUSG00000004231 | Pax2   | 1  |
| ENSMUSG00000029673 | Auts2    | 20 | ENSMUSG00000027168 | Pax6   | 9  |
| ENSMUSG00000087519 | AV039307 | 20 | ENSMUSG00000022974 | Paxbp1 | 20 |



|                    |               |    |                    |         |    |
|--------------------|---------------|----|--------------------|---------|----|
| ENSMUSG0000087377  | AV099323      | 18 | ENSMUSG0000002221  | Paxip1  | 20 |
| ENSMUSG00000108461 | AV356131      | 20 | ENSMUSG00000047617 | Paxx    | 2  |
| ENSMUSG00000003604 | Aven          | 20 | ENSMUSG00000031226 | Pbdc1   | 20 |
| ENSMUSG00000025432 | Avil          | 19 | ENSMUSG00000020072 | Pbld2   | 20 |
| ENSMUSG00000029787 | Avi9          | 2  | ENSMUSG00000042323 | Pbrm1   | 20 |
| ENSMUSG00000037727 | Avp           | 20 | ENSMUSG00000052534 | Pbx1    | 16 |
| ENSMUSG00000018821 | Avpi1         | 1  | ENSMUSG00000034673 | Pbx2    | 20 |
| ENSMUSG00000078349 | AW011738      | 1  | ENSMUSG00000038718 | Pbx3    | 6  |
| ENSMUSG00000110419 | AW046200      | 20 | ENSMUSG00000031860 | Pbx4    | 3  |
| ENSMUSG00000097428 | AW047730      | 3  | ENSMUSG00000042613 | Pbxip1  | 20 |
| ENSMUSG00000075010 | AW112010      | 20 | ENSMUSG00000020098 | Pcbd1   | 9  |
| ENSMUSG00000074166 | AW146154      | 20 | ENSMUSG00000021496 | Pcbd2   | 10 |
| ENSMUSG00000039182 | AW209491      | 20 | ENSMUSG00000051695 | Pcbp1   | 12 |
| ENSMUSG00000087334 | AW495222      | 20 | ENSMUSG00000056851 | Pcbp2   | 9  |
| ENSMUSG00000041935 | AW549877      | 20 | ENSMUSG00000001120 | Pcbp3   | 20 |
| ENSMUSG00000038112 | AW551984      | 17 | ENSMUSG00000023495 | Pcbp4   | 9  |
| ENSMUSG00000033632 | AW554918      | 20 | ENSMUSG00000041650 | Pcca    | 20 |
| ENSMUSG00000085998 | AW822252      | 20 | ENSMUSG00000032527 | Pccb    | 20 |
| ENSMUSG00000026601 | Axdnd1        | 20 | ENSMUSG00000051375 | Pcdh1   | 5  |
| ENSMUSG00000024182 | Axin1         | 20 | ENSMUSG00000049100 | Pcdh10  | 1  |
| ENSMUSG00000000142 | Axin2         | 6  | ENSMUSG00000034755 | Pcdh11x | 1  |
| ENSMUSG00000002602 | Axl           | 20 | ENSMUSG00000052613 | Pcdh15  | 9  |
| ENSMUSG00000039285 | Azi2          | 2  | ENSMUSG00000035566 | Pcdh17  | 2  |
| ENSMUSG00000037458 | Azin1         | 20 | ENSMUSG00000037892 | Pcdh18  | 9  |
| ENSMUSG00000028789 | Azin2         | 20 | ENSMUSG00000051323 | Pcdh19  | 9  |
| ENSMUSG00000109995 | B020031H02Rik | 20 | ENSMUSG00000050505 | Pcdh20  | 5  |
| ENSMUSG00000108042 | B130021K23Rik | 20 | ENSMUSG00000029108 | Pcdh7   | 20 |
| ENSMUSG00000100005 | B130024G19Rik | 16 | ENSMUSG00000036422 | Pcdh8   | 5  |
| ENSMUSG00000093606 | B130034C11Rik | 20 | ENSMUSG00000055421 | Pcdh9   | 19 |
| ENSMUSG00000097414 | B130046B21Rik | 12 | ENSMUSG00000103442 | Pcdha1  | 20 |
| ENSMUSG00000086502 | B130055M24Rik | 20 | ENSMUSG00000007440 | Pcdha11 | 18 |
| ENSMUSG00000097547 | B230110C06Rik | 20 | ENSMUSG00000102206 | Pcdha11 | 12 |
| ENSMUSG00000100166 | B230110G15Rik | 20 | ENSMUSG00000103310 | Pcdha12 | 20 |
| ENSMUSG00000107729 | B230112I24Rik | 20 | ENSMUSG00000104148 | Pcdha2  | 12 |
| ENSMUSG00000027165 | B230118H07Rik | 20 | ENSMUSG00000102312 | Pcdha3  | 20 |
| ENSMUSG00000086844 | B230206H07Rik | 16 | ENSMUSG00000104252 | Pcdha4  | 20 |
| ENSMUSG00000109574 | B230206I08Rik | 9  | ENSMUSG00000103092 | Pcdha5  | 20 |
| ENSMUSG00000086003 | B230206I02Rik | 12 | ENSMUSG00000103707 | Pcdha6  | 2  |
| ENSMUSG00000092492 | B230208B08Rik | 20 | ENSMUSG00000104318 | Pcdha7  | 20 |
| ENSMUSG00000097378 | B230208H11Rik | 20 | ENSMUSG00000103800 | Pcdha8  | 20 |
| ENSMUSG00000109006 | B230209E15Rik | 20 | ENSMUSG00000103770 | Pcdha9  | 20 |
| ENSMUSG00000089706 | B230216N24Rik | 20 | ENSMUSG00000103255 | Pcdhac1 | 20 |
| ENSMUSG00000050538 | B230217C12Rik | 19 | ENSMUSG00000102697 | Pcdhac2 | 20 |
| ENSMUSG00000097785 | B230217O12Rik | 20 | ENSMUSG00000051663 | Pcdhb1  | 3  |
| ENSMUSG00000045767 | B230219D22Rik | 20 | ENSMUSG00000045657 | Pcdhb10 | 1  |
| ENSMUSG00000113701 | B230303A05Rik | 20 | ENSMUSG00000051486 | Pcdhb11 | 20 |
| ENSMUSG00000106547 | B230303O12Rik | 14 | ENSMUSG00000043458 | Pcdhb12 | 1  |
| ENSMUSG00000080717 | B230307C23Rik | 17 | ENSMUSG00000047307 | Pcdhb13 | 1  |
| ENSMUSG00000109284 | B230311B06Rik | 20 | ENSMUSG00000044043 | Pcdhb14 | 1  |
| ENSMUSG00000084843 | B230312C02Rik | 20 | ENSMUSG00000047033 | Pcdhb15 | 1  |
| ENSMUSG00000045746 | B230317F23Rik | 20 | ENSMUSG00000047910 | Pcdhb16 | 2  |
| ENSMUSG00000051844 | B230319C09Rik | 20 | ENSMUSG00000046387 | Pcdhb17 | 1  |
| ENSMUSG00000097509 | B230322F03Rik | 20 | ENSMUSG00000048347 | Pcdhb18 | 1  |
| ENSMUSG00000097623 | B230323A14Rik | 19 | ENSMUSG00000043313 | Pcdhb19 | 1  |
| ENSMUSG00000104597 | B230334C09Rik | 7  | ENSMUSG00000051599 | Pcdhb2  | 1  |

|                    |               |    |                    |          |    |
|--------------------|---------------|----|--------------------|----------|----|
| ENSMUSG0000097119  | B230354K17Rik | 9  | ENSMUSG0000046191  | Pcdhb20  | 1  |
| ENSMUSG00000115543 | B230362B09Rik | 3  | ENSMUSG0000044022  | Pcdhb21  | 1  |
| ENSMUSG00000104195 | B230377A18Rik | 13 | ENSMUSG0000073591  | Pcdhb22  | 1  |
| ENSMUSG00000087660 | B230398E01Rik | 20 | ENSMUSG00000045498 | Pcdhb3   | 1  |
| ENSMUSG00000060802 | B2m           | 20 | ENSMUSG00000045689 | Pcdhb4   | 1  |
| ENSMUSG00000048406 | B330016D10Rik | 20 | ENSMUSG00000063687 | Pcdhb5   | 2  |
| ENSMUSG00000043300 | B3galnt1      | 20 | ENSMUSG00000051678 | Pcdhb6   | 20 |
| ENSMUSG00000039242 | B3galnt2      | 20 | ENSMUSG00000045062 | Pcdhb7   | 20 |
| ENSMUSG00000034780 | B3galt1       | 20 | ENSMUSG00000045876 | Pcdhb8   | 9  |
| ENSMUSG00000033849 | B3galt2       | 9  | ENSMUSG00000051242 | Pcdhb9   | 20 |
| ENSMUSG00000067370 | B3galt4       | 12 | ENSMUSG00000103144 | Pcdhga1  | 20 |
| ENSMUSG00000074892 | B3galt5       | 20 | ENSMUSG00000102222 | Pcdhga10 | 20 |
| ENSMUSG00000050796 | B3galt6       | 20 | ENSMUSG00000102742 | Pcdhga11 | 18 |
| ENSMUSG00000045994 | B3gat1        | 5  | ENSMUSG00000102428 | Pcdhga12 | 7  |
| ENSMUSG00000026156 | B3gat2        | 17 | ENSMUSG00000103332 | Pcdhga2  | 1  |
| ENSMUSG00000071649 | B3gat3        | 7  | ENSMUSG00000104346 | Pcdhga3  | 20 |
| ENSMUSG00000051950 | B3glct        | 19 | ENSMUSG00000103677 | Pcdhga4  | 6  |
| ENSMUSG00000051650 | B3gnt2        | 9  | ENSMUSG00000103567 | Pcdhga5  | 9  |
| ENSMUSG00000031803 | B3gnt3        | 20 | ENSMUSG00000103793 | Pcdhga6  | 9  |
| ENSMUSG00000029431 | B3gnt4        | 10 | ENSMUSG00000103472 | Pcdhga7  | 9  |
| ENSMUSG00000022686 | B3gnt5        | 20 | ENSMUSG00000103897 | Pcdhga8  | 19 |
| ENSMUSG00000074004 | B3gnt6        | 20 | ENSMUSG00000102440 | Pcdhga9  | 6  |
| ENSMUSG00000079445 | B3gnt7        | 20 | ENSMUSG00000103037 | Pcdhgb1  | 20 |
| ENSMUSG00000059479 | B3gnt8        | 20 | ENSMUSG00000102748 | Pcdhgb2  | 20 |
| ENSMUSG00000069920 | B3gnt9        | 20 | ENSMUSG00000103585 | Pcdhgb4  | 20 |
| ENSMUSG00000046605 | B3gnt1        | 1  | ENSMUSG00000103749 | Pcdhgb5  | 20 |
| ENSMUSG00000067356 | B430203G13Rik | 20 | ENSMUSG00000103088 | Pcdhgb6  | 20 |
| ENSMUSG00000053706 | B430305J03Rik | 20 | ENSMUSG00000104063 | Pcdhgb7  | 9  |
| ENSMUSG00000110062 | B430319F04Rik | 20 | ENSMUSG00000103081 | Pcdhgb8  | 20 |
| ENSMUSG00000006731 | B4galnt1      | 1  | ENSMUSG00000102918 | Pcdhgc3  | 20 |
| ENSMUSG00000055629 | B4galnt4      | 9  | ENSMUSG00000023036 | Pcdhgc4  | 20 |
| ENSMUSG00000028413 | B4galt1       | 20 | ENSMUSG00000102543 | Pcdhgc5  | 18 |
| ENSMUSG00000028541 | B4galt2       | 9  | ENSMUSG00000037773 | Pced1a   | 20 |
| ENSMUSG00000052423 | B4galt3       | 20 | ENSMUSG00000044250 | Pced1b   | 20 |
| ENSMUSG00000022793 | B4galt4       | 20 | ENSMUSG00000041328 | Pcf11    | 2  |
| ENSMUSG00000017929 | B4galt5       | 19 | ENSMUSG00000069678 | Pcgf1    | 20 |
| ENSMUSG00000056124 | B4galt6       | 16 | ENSMUSG00000018537 | Pcgf2    | 20 |
| ENSMUSG00000021504 | B4galt7       | 20 | ENSMUSG00000033623 | Pcgf3    | 2  |
| ENSMUSG00000047379 | B4gat1        | 20 | ENSMUSG00000024805 | Pcgf5    | 20 |
| ENSMUSG00000052364 | B630019K06Rik | 17 | ENSMUSG00000025050 | Pcgf6    | 20 |
| ENSMUSG00000098202 | B830012L14Rik | 3  | ENSMUSG00000038542 | Pcid2    | 20 |
| ENSMUSG00000116652 | B830017H08Rik | 20 | ENSMUSG00000039849 | Pcif1    | 20 |
| ENSMUSG00000108847 | B830042I05Rik | 20 | ENSMUSG00000040618 | Pck2     | 20 |
| ENSMUSG00000113361 | B930059L03Rik | 10 | ENSMUSG00000061601 | Pclo     | 3  |
| ENSMUSG00000110282 | B930086L07Rik | 20 | ENSMUSG00000031592 | Pcm1     | 2  |
| ENSMUSG00000085133 | B930095G15Rik | 20 | ENSMUSG00000051285 | Pcmt1    | 9  |
| ENSMUSG00000001039 | B9d1          | 20 | ENSMUSG00000027589 | Pcmt2    | 9  |
| ENSMUSG00000060808 | B9d1os        | 20 | ENSMUSG00000027342 | Pcna     | 20 |
| ENSMUSG00000063439 | B9d2          | 20 | ENSMUSG00000067608 | Pcna-ps2 | 20 |
| ENSMUSG00000031820 | Babam1        | 7  | ENSMUSG00000071533 | Pcnp     | 9  |
| ENSMUSG00000052139 | Babam2        | 20 | ENSMUSG00000001151 | Pcnt     | 20 |
| ENSMUSG00000032086 | Bace1         | 20 | ENSMUSG00000021140 | Pcnx     | 2  |
| ENSMUSG00000040605 | Bace2         | 9  | ENSMUSG00000060212 | Pcnx2    | 20 |
| ENSMUSG00000025612 | Bach1         | 20 | ENSMUSG00000054874 | Pcnx3    | 20 |
| ENSMUSG00000040270 | Bach2         | 11 | ENSMUSG00000034501 | Pcnx4    | 20 |

|                    |           |    |                    |          |    |
|--------------------|-----------|----|--------------------|----------|----|
| ENSMUSG0000087049  | Bach2it1  | 20 | ENSMUSG00000029718 | Pcolce   | 13 |
| ENSMUSG0000024959  | Bad       | 13 | ENSMUSG00000015354 | Pcolce2  | 20 |
| ENSMUSG0000028416  | Bag1      | 20 | ENSMUSG00000090223 | Pcp4     | 1  |
| ENSMUSG0000042215  | Bag2      | 20 | ENSMUSG00000038370 | Pcp411   | 1  |
| ENSMUSG0000030847  | Bag3      | 20 | ENSMUSG00000021587 | Pck1     | 1  |
| ENSMUSG0000037316  | Bag4      | 20 | ENSMUSG00000039278 | Pck1n    | 20 |
| ENSMUSG0000049792  | Bag5      | 3  | ENSMUSG00000027419 | Pck2     | 20 |
| ENSMUSG0000024392  | Bag6      | 20 | ENSMUSG00000086171 | Pck2os1  | 20 |
| ENSMUSG0000039741  | Bahcc1    | 20 | ENSMUSG00000020131 | Pck4     | 20 |
| ENSMUSG0000040007  | Bahd1     | 18 | ENSMUSG00000024713 | Pck5     | 19 |
| ENSMUSG0000025372  | Baiap2    | 9  | ENSMUSG00000030513 | Pck6     | 16 |
| ENSMUSG0000038859  | Baiap2l1  | 13 | ENSMUSG00000035382 | Pck7     | 12 |
| ENSMUSG00000018126 | Baiap2l2  | 20 | ENSMUSG00000044254 | Pck9     | 20 |
| ENSMUSG0000047507  | Baiap3    | 17 | ENSMUSG00000020553 | Pctp     | 20 |
| ENSMUSG00000057789 | Bak1      | 20 | ENSMUSG00000024892 | Pcx      | 18 |
| ENSMUSG00000024232 | Bambi     | 20 | ENSMUSG00000029998 | Pcyox1   | 12 |
| ENSMUSG00000081219 | Bambi-ps1 | 1  | ENSMUSG00000024579 | Pcyox1l  | 20 |
| ENSMUSG00000024844 | Banf1     | 19 | ENSMUSG00000005615 | Pcyt1a   | 20 |
| ENSMUSG00000037922 | Bank1     | 9  | ENSMUSG00000035246 | Pcyt1b   | 1  |
| ENSMUSG00000025316 | Banp      | 20 | ENSMUSG00000025137 | Pcyt2    | 20 |
| ENSMUSG00000021901 | Bap1      | 9  | ENSMUSG00000029623 | Pdap1    | 20 |
| ENSMUSG00000026196 | Bard1     | 18 | ENSMUSG00000027835 | Pdcd10   | 20 |
| ENSMUSG00000021381 | Barx1     | 1  | ENSMUSG00000025047 | Pdcd11   | 20 |
| ENSMUSG00000032033 | Barx2     | 20 | ENSMUSG00000014771 | Pdcd2    | 20 |
| ENSMUSG00000045763 | Basp1     | 19 | ENSMUSG00000002635 | Pdcd2l   | 20 |
| ENSMUSG0000003873  | Bax       | 20 | ENSMUSG00000024975 | Pdcd4    | 20 |
| ENSMUSG00000035021 | Baz1a     | 9  | ENSMUSG00000030417 | Pdcd5    | 10 |
| ENSMUSG0000002748  | Baz1b     | 12 | ENSMUSG00000102824 | Pdcd5-ps | 20 |
| ENSMUSG0000040054  | Baz2a     | 1  | ENSMUSG00000021576 | Pdcd6    | 6  |
| ENSMUSG0000026987  | Baz2b     | 1  | ENSMUSG00000032504 | Pdcd6ip  | 20 |
| ENSMUSG0000085041  | BB031773  | 19 | ENSMUSG00000041837 | Pdcd7    | 18 |
| ENSMUSG00000105389 | BB187690  | 9  | ENSMUSG00000009030 | Pdcl     | 20 |
| ENSMUSG0000085218  | BB218582  | 9  | ENSMUSG00000026078 | Pdcl3    | 20 |
| ENSMUSG0000002083  | Bbc3      | 9  | ENSMUSG00000023868 | Pde10a   | 9  |
| ENSMUSG0000084957  | Bbip1     | 12 | ENSMUSG00000075270 | Pde11a   | 20 |
| ENSMUSG00000057265 | Bbof1     | 20 | ENSMUSG00000059173 | Pde1a    | 20 |
| ENSMUSG00000041660 | Bbox1     | 9  | ENSMUSG00000022489 | Pde1b    | 9  |
| ENSMUSG00000006464 | Bbs1      | 2  | ENSMUSG00000004347 | Pde1c    | 7  |
| ENSMUSG00000035759 | Bbs10     | 20 | ENSMUSG00000110195 | Pde2a    | 9  |
| ENSMUSG00000051444 | Bbs12     | 20 | ENSMUSG00000041741 | Pde3a    | 20 |
| ENSMUSG00000031755 | Bbs2      | 1  | ENSMUSG00000030671 | Pde3b    | 20 |
| ENSMUSG00000025235 | Bbs4      | 20 | ENSMUSG00000032177 | Pde4a    | 20 |
| ENSMUSG00000063145 | Bbs5      | 20 | ENSMUSG00000028525 | Pde4b    | 9  |
| ENSMUSG00000037325 | Bbs7      | 18 | ENSMUSG00000021699 | Pde4d    | 3  |
| ENSMUSG00000035919 | Bbs9      | 1  | ENSMUSG00000038170 | Pde4dip  | 7  |
| ENSMUSG00000022641 | Bbx       | 6  | ENSMUSG00000053965 | Pde5a    | 6  |
| ENSMUSG00000060149 | BC002059  | 20 | ENSMUSG00000029491 | Pde6b    | 20 |
| ENSMUSG00000081824 | BC002163  | 12 | ENSMUSG00000026239 | Pde6d    | 20 |
| ENSMUSG00000067722 | BC003965  | 20 | ENSMUSG00000064330 | Pde6h    | 20 |
| ENSMUSG00000052712 | BC004004  | 20 | ENSMUSG00000069094 | Pde7a    | 20 |
| ENSMUSG00000019132 | BC005537  | 2  | ENSMUSG00000019990 | Pde7b    | 9  |
| ENSMUSG00000079065 | BC005561  | 2  | ENSMUSG00000025584 | Pde8a    | 16 |
| ENSMUSG00000026851 | BC005624  | 20 | ENSMUSG00000021684 | Pde8b    | 9  |
| ENSMUSG00000041674 | BC006965  | 20 | ENSMUSG00000041119 | Pde9a    | 20 |
| ENSMUSG00000033187 | BC016579  | 20 | ENSMUSG00000078931 | Pdf      | 20 |

|                    |          |    |                    |         |    |
|--------------------|----------|----|--------------------|---------|----|
| ENSMUSG0000030780  | BC017158 | 7  | ENSMUSG00000025856 | Pdgfa   | 20 |
| ENSMUSG0000056032  | BC018473 | 20 | ENSMUSG00000000489 | Pdgfb   | 20 |
| ENSMUSG0000081137  | BC022960 | 7  | ENSMUSG00000028019 | Pdgfc   | 1  |
| ENSMUSG0000092365  | BC023719 | 11 | ENSMUSG00000032006 | Pdgfd   | 13 |
| ENSMUSG00000112160 | BC024063 | 20 | ENSMUSG00000029231 | Pdgfra  | 20 |
| ENSMUSG0000044361  | BC024139 | 7  | ENSMUSG00000024620 | Pdgfrb  | 20 |
| ENSMUSG00000078786 | BC024978 | 20 | ENSMUSG00000031595 | Pdgfrl  | 20 |
| ENSMUSG00000074862 | BC025920 | 9  | ENSMUSG00000031299 | Pdha1   | 9  |
| ENSMUSG00000118004 | BC026513 | 20 | ENSMUSG00000021748 | Pdha2   | 2  |
| ENSMUSG00000038543 | BC028528 | 20 | ENSMUSG00000010914 | Pdhx    | 9  |
| ENSMUSG00000074649 | BC029722 | 12 | ENSMUSG00000027248 | Pdia3   | 20 |
| ENSMUSG00000105345 | BC030343 | 20 | ENSMUSG00000025823 | Pdia4   | 20 |
| ENSMUSG00000049946 | BC030500 | 9  | ENSMUSG00000022844 | Pdia5   | 20 |
| ENSMUSG00000034773 | BC030867 | 18 | ENSMUSG00000020571 | Pdia6   | 20 |
| ENSMUSG00000036299 | BC031181 | 12 | ENSMUSG00000050890 | Pdik1l  | 20 |
| ENSMUSG00000033722 | BC034090 | 9  | ENSMUSG00000006494 | Pdk1    | 9  |
| ENSMUSG00000090164 | BC035044 | 12 | ENSMUSG00000038967 | Pdk2    | 2  |
| ENSMUSG00000090486 | BC035947 | 18 | ENSMUSG00000035232 | Pdk3    | 20 |
| ENSMUSG00000087221 | BC037032 | 20 | ENSMUSG00000019577 | Pdk4    | 20 |
| ENSMUSG00000103309 | BC037039 | 20 | ENSMUSG00000055044 | Pdim1   | 19 |
| ENSMUSG00000117698 | BC037704 | 20 | ENSMUSG00000022090 | Pdim2   | 3  |
| ENSMUSG00000086272 | BC039966 | 20 | ENSMUSG00000031636 | Pdim3   | 20 |
| ENSMUSG00000056418 | BC043934 | 20 | ENSMUSG00000020388 | Pdim4   | 20 |
| ENSMUSG00000086662 | BC046251 | 9  | ENSMUSG00000028273 | Pdim5   | 9  |
| ENSMUSG00000053684 | BC048403 | 20 | ENSMUSG00000021493 | Pdim7   | 19 |
| ENSMUSG00000091996 | BC049352 | 1  | ENSMUSG00000049225 | Pdp1    | 20 |
| ENSMUSG00000047515 | BC049715 | 20 | ENSMUSG00000048371 | Pdp2    | 12 |
| ENSMUSG00000057246 | BC051142 | 1  | ENSMUSG00000024122 | Pdpk1   | 9  |
| ENSMUSG00000092564 | BC051226 | 20 | ENSMUSG00000033624 | Pdpr    | 12 |
| ENSMUSG00000117478 | BC051408 | 20 | ENSMUSG00000027472 | Pdrg1   | 12 |
| ENSMUSG00000040282 | BC052040 | 20 | ENSMUSG00000029202 | Pds5a   | 11 |
| ENSMUSG00000103973 | BC055308 | 20 | ENSMUSG00000034021 | Pds5b   | 4  |
| ENSMUSG00000041406 | BC055324 | 20 | ENSMUSG00000026784 | Pdss1   | 20 |
| ENSMUSG00000101429 | BC055402 | 12 | ENSMUSG00000038240 | Pdss2   | 20 |
| ENSMUSG00000108737 | BC060293 | 20 | ENSMUSG00000022680 | Pdxdc1  | 20 |
| ENSMUSG00000087150 | BC064078 | 20 | ENSMUSG00000032788 | Pdxk    | 1  |
| ENSMUSG00000087368 | BC065397 | 20 | ENSMUSG00000116165 | Pdyp    | 20 |
| ENSMUSG00000021763 | BC067074 | 20 | ENSMUSG00000027400 | Pdyn    | 3  |
| ENSMUSG00000102478 | BC085271 | 20 | ENSMUSG00000015668 | Pdzd11  | 20 |
| ENSMUSG00000115783 | Bc1      | 10 | ENSMUSG00000022197 | Pdzd2   | 9  |
| ENSMUSG00000045231 | BC106179 | 18 | ENSMUSG00000032105 | Pdzd3   | 20 |
| ENSMUSG00000002980 | Bcam     | 13 | ENSMUSG00000002006 | Pdzd4   | 9  |
| ENSMUSG00000004892 | Bcan     | 1  | ENSMUSG00000074818 | Pdzd7   | 20 |
| ENSMUSG00000020650 | Bcap29   | 20 | ENSMUSG00000074746 | Pdzd8   | 12 |
| ENSMUSG00000002015 | Bcap31   | 9  | ENSMUSG00000030887 | Pdzd9   | 1  |
| ENSMUSG00000031955 | Bcar1    | 20 | ENSMUSG00000024227 | Pdzph1  | 20 |
| ENSMUSG00000028121 | Bcar3    | 20 | ENSMUSG00000035357 | Pdzrn3  | 18 |
| ENSMUSG00000013523 | Bcas1    | 16 | ENSMUSG00000036218 | Pdzrn4  | 9  |
| ENSMUSG00000086970 | Bcas1os1 | 20 | ENSMUSG00000013698 | Pea15a  | 20 |
| ENSMUSG00000086999 | Bcas1os2 | 20 | ENSMUSG00000074305 | Peak1   | 19 |
| ENSMUSG00000005687 | Bcas2    | 20 | ENSMUSG00000097111 | Peak1os | 20 |
| ENSMUSG00000059439 | Bcas3    | 20 | ENSMUSG00000028073 | Pear1   | 20 |
| ENSMUSG00000030268 | Bcat1    | 18 | ENSMUSG00000032959 | Pebp1   | 12 |
| ENSMUSG00000030826 | Bcat2    | 20 | ENSMUSG00000020717 | Pecam1  | 20 |
| ENSMUSG00000030983 | Bccip    | 20 | ENSMUSG00000026189 | Pecr    | 20 |

|                     |         |    |                     |           |    |
|---------------------|---------|----|---------------------|-----------|----|
| ENSMUSG00000037525  | Bcdin3d | 20 | ENSMUSG00000028779  | Pef1      | 19 |
| ENSMUSG00000027792  | Bche    | 20 | ENSMUSG00000092035  | Peg10     | 17 |
| ENSMUSG00000060376  | Bckdha  | 3  | ENSMUSG00000106847  | Peg13     | 18 |
| ENSMUSG00000032263  | Bckdhb  | 20 | ENSMUSG00000002265  | Peg3      | 18 |
| ENSMUSG00000030802  | Bckdk   | 9  | ENSMUSG00000020134  | Peli1     | 19 |
| ENSMUSG00000028191  | Bcl10   | 20 | ENSMUSG00000021846  | Peli2     | 1  |
| ENSMUSG00000000861  | Bcl11a  | 18 | ENSMUSG00000024901  | Peli3     | 20 |
| ENSMUSG00000048251  | Bcl11b  | 9  | ENSMUSG00000042275  | Pelo      | 20 |
| ENSMUSG00000057329  | Bcl2    | 20 | ENSMUSG00000018921  | Pelp1     | 20 |
| ENSMUSG00000007659  | Bcl211  | 20 | ENSMUSG00000000301  | Pemt      | 20 |
| ENSMUSG00000027381  | Bcl2111 | 9  | ENSMUSG00000045573  | Penk      | 9  |
| ENSMUSG00000003190  | Bcl2112 | 20 | ENSMUSG000000063931 | Pepd      | 9  |
| ENSMUSG000000009112 | Bcl2113 | 12 | ENSMUSG00000020893  | Per1      | 16 |
| ENSMUSG00000044165  | Bcl2115 | 9  | ENSMUSG00000055866  | Per2      | 9  |
| ENSMUSG00000089682  | Bcl212  | 20 | ENSMUSG00000028957  | Per3      | 1  |
| ENSMUSG00000053175  | Bcl3    | 20 | ENSMUSG00000078486  | Perm1     | 20 |
| ENSMUSG00000022508  | Bcl6    | 20 | ENSMUSG00000019851  | Perp      | 13 |
| ENSMUSG00000000317  | Bcl6b   | 20 | ENSMUSG00000020430  | Pes1      | 3  |
| ENSMUSG00000029438  | Bcl7a   | 20 | ENSMUSG00000087687  | Pet100    | 12 |
| ENSMUSG00000029681  | Bcl7b   | 20 | ENSMUSG00000005907  | Pex1      | 20 |
| ENSMUSG00000030814  | Bcl7c   | 9  | ENSMUSG00000029047  | Pex10     | 20 |
| ENSMUSG00000038256  | Bcl9    | 20 | ENSMUSG00000030545  | Pex11a    | 20 |
| ENSMUSG00000063382  | Bcl9l   | 9  | ENSMUSG00000028102  | Pex11b    | 20 |
| ENSMUSG00000037608  | Bclaf1  | 20 | ENSMUSG00000069633  | Pex11g    | 20 |
| ENSMUSG00000044150  | Bclaf3  | 20 | ENSMUSG00000018733  | Pex12     | 20 |
| ENSMUSG00000032066  | Bco2    | 18 | ENSMUSG00000020283  | Pex13     | 20 |
| ENSMUSG00000040363  | Bcor    | 20 | ENSMUSG00000028975  | Pex14     | 20 |
| ENSMUSG00000036959  | Bcorl1  | 20 | ENSMUSG00000027222  | Pex16     | 20 |
| ENSMUSG00000009681  | Bcr     | 9  | ENSMUSG00000003464  | Pex19     | 20 |
| ENSMUSG00000026172  | Bcs1l   | 20 | ENSMUSG00000040374  | Pex2      | 20 |
| ENSMUSG00000046598  | Bdh1    | 18 | ENSMUSG00000067825  | Pex26     | 20 |
| ENSMUSG00000028167  | Bdh2    | 20 | ENSMUSG00000019809  | Pex3      | 20 |
| ENSMUSG00000021070  | Bdkrb2  | 20 | ENSMUSG00000005069  | Pex5      | 20 |
| ENSMUSG00000048482  | Bdnf    | 5  | ENSMUSG00000027674  | Pex5l     | 16 |
| ENSMUSG00000049658  | Bdp1    | 20 | ENSMUSG00000002763  | Pex6      | 20 |
| ENSMUSG00000031872  | Bean1   | 20 | ENSMUSG00000020003  | Pex7      | 20 |
| ENSMUSG00000035086  | Becn1   | 20 | ENSMUSG00000020899  | Pfas      | 1  |
| ENSMUSG00000040867  | Begain  | 5  | ENSMUSG00000024346  | Pfdn1     | 12 |
| ENSMUSG00000038214  | Bend3   | 20 | ENSMUSG00000006412  | Pfdn2     | 10 |
| ENSMUSG00000092060  | Bend4   | 1  | ENSMUSG00000052033  | Pfdn4     | 20 |
| ENSMUSG00000028545  | Bend5   | 2  | ENSMUSG00000001289  | Pfdn5     | 12 |
| ENSMUSG00000042182  | Bend6   | 18 | ENSMUSG00000024309  | Pfdn6     | 12 |
| ENSMUSG00000048186  | Bend7   | 20 | ENSMUSG00000025271  | Pfkfb1    | 9  |
| ENSMUSG00000037418  | Best1   | 20 | ENSMUSG00000026409  | Pfkfb2    | 20 |
| ENSMUSG00000020169  | Best3   | 19 | ENSMUSG00000026773  | Pfkfb3    | 5  |
| ENSMUSG00000032757  | Bet1    | 20 | ENSMUSG00000025648  | Pfkfb4    | 20 |
| ENSMUSG00000025484  | Bet1l   | 13 | ENSMUSG00000020277  | Pfkl      | 1  |
| ENSMUSG00000050071  | Bex1    | 12 | ENSMUSG00000033065  | Pfkm      | 18 |
| ENSMUSG00000042750  | Bex2    | 16 | ENSMUSG00000021196  | Pfkp      | 20 |
| ENSMUSG00000046432  | Bex3    | 19 | ENSMUSG00000018293  | Pfn1      | 20 |
| ENSMUSG00000047844  | Bex4    | 20 | ENSMUSG00000027805  | Pfn2      | 16 |
| ENSMUSG00000022684  | Bfar    | 20 | ENSMUSG00000020639  | Pfn4      | 20 |
| ENSMUSG00000027420  | Bfsp1   | 20 | ENSMUSG00000011752  | Pgam1     | 9  |
| ENSMUSG00000032556  | Bfsp2   | 20 | ENSMUSG00000082016  | Pgam1-ps2 | 20 |
| ENSMUSG00000031375  | Bgn     | 13 | ENSMUSG00000020475  | Pgam2     | 3  |

|                    |            |    |                    |          |    |
|--------------------|------------|----|--------------------|----------|----|
| ENSMUSG00000072964 | Bhlhb9     | 9  | ENSMUSG00000029500 | Pgam5    | 20 |
| ENSMUSG00000025128 | Bhlhe22    | 5  | ENSMUSG00000073678 | Pgap1    | 20 |
| ENSMUSG00000030103 | Bhlhe40    | 1  | ENSMUSG00000030990 | Pgap2    | 20 |
| ENSMUSG00000030256 | Bhlhe41    | 1  | ENSMUSG00000038208 | Pgap3    | 20 |
| ENSMUSG00000014329 | Bicc1      | 20 | ENSMUSG00000055313 | Pgbd1    | 20 |
| ENSMUSG00000003452 | Bicd1      | 3  | ENSMUSG00000050751 | Pgbd5    | 9  |
| ENSMUSG00000037933 | Bicd2      | 20 | ENSMUSG00000028961 | Pgd      | 20 |
| ENSMUSG00000041609 | Bicd11     | 20 | ENSMUSG00000004791 | Pgf      | 20 |
| ENSMUSG00000070808 | Bicra      | 20 | ENSMUSG00000062031 | Pgghg    | 20 |
| ENSMUSG00000036568 | Bicral     | 20 | ENSMUSG00000024477 | Pggt1b   | 2  |
| ENSMUSG00000004446 | Bid        | 9  | ENSMUSG00000062070 | Pgk1     | 9  |
| ENSMUSG00000024381 | Bin1       | 20 | ENSMUSG00000066632 | Pgk1-rs7 | 20 |
| ENSMUSG00000098112 | Bin2       | 20 | ENSMUSG00000031807 | Pgls     | 13 |
| ENSMUSG00000022089 | Bin3       | 20 | ENSMUSG00000030413 | Pglyrp1  | 20 |
| ENSMUSG00000057367 | Birc2      | 20 | ENSMUSG00000029171 | Pgm2     | 20 |
| ENSMUSG00000032000 | Birc3      | 20 | ENSMUSG00000030729 | Pgm2l1   | 5  |
| ENSMUSG00000017716 | Birc5      | 20 | ENSMUSG00000056131 | Pgm3     | 20 |
| ENSMUSG00000024073 | Birc6      | 3  | ENSMUSG00000041731 | Pgm5     | 20 |
| ENSMUSG00000041684 | Bivm       | 3  | ENSMUSG00000043445 | Pgp      | 20 |
| ENSMUSG00000067787 | Blcap      | 20 | ENSMUSG00000056204 | Pgpep1   | 20 |
| ENSMUSG00000030528 | Blm        | 20 | ENSMUSG00000030553 | Pgpep1l  | 20 |
| ENSMUSG00000020840 | Blmh       | 20 | ENSMUSG00000031870 | Pgr      | 12 |
| ENSMUSG00000061132 | Blnk       | 9  | ENSMUSG00000006373 | Pgrmc1   | 18 |
| ENSMUSG00000090247 | Bloc1s1    | 12 | ENSMUSG00000049940 | Pgrmc2   | 1  |
| ENSMUSG00000057506 | Bloc1s2    | 12 | ENSMUSG00000017715 | Pgs1     | 12 |
| ENSMUSG00000025201 | Bloc1s2-ps | 20 | ENSMUSG00000054728 | Phactr1  | 9  |
| ENSMUSG00000057667 | Bloc1s3    | 20 | ENSMUSG00000062866 | Phactr2  | 18 |
| ENSMUSG00000060708 | Bloc1s4    | 20 | ENSMUSG00000027525 | Phactr3  | 9  |
| ENSMUSG00000038982 | Bloc1s5    | 20 | ENSMUSG00000066043 | Phactr4  | 15 |
| ENSMUSG00000005804 | Bloc1s6    | 20 | ENSMUSG00000008301 | Phax     | 20 |
| ENSMUSG00000001999 | Blvra      | 20 | ENSMUSG00000038845 | Phb      | 20 |
| ENSMUSG00000040466 | Blvrb      | 20 | ENSMUSG00000004264 | Phb2     | 20 |
| ENSMUSG00000026577 | Blzf1      | 2  | ENSMUSG00000040669 | Phc1     | 20 |
| ENSMUSG00000044117 | Bmerb1     | 9  | ENSMUSG00000028796 | Phc2     | 9  |
| ENSMUSG00000040093 | Bmf        | 20 | ENSMUSG00000037652 | Phc3     | 2  |
| ENSMUSG00000026739 | Bmi1       | 1  | ENSMUSG00000044134 | Pheta1   | 20 |
| ENSMUSG00000022098 | Bmp1       | 20 | ENSMUSG00000057457 | Phex     | 1  |
| ENSMUSG00000027358 | Bmp2       | 1  | ENSMUSG00000024193 | Phf1     | 20 |
| ENSMUSG00000034663 | Bmp2k      | 15 | ENSMUSG00000023883 | Phf10    | 20 |
| ENSMUSG00000029335 | Bmp3       | 20 | ENSMUSG00000091144 | Phf11c   | 20 |
| ENSMUSG00000021835 | Bmp4       | 20 | ENSMUSG00000068245 | Phf11d   | 20 |
| ENSMUSG00000032179 | Bmp5       | 9  | ENSMUSG00000037791 | Phf12    | 9  |
| ENSMUSG00000039004 | Bmp6       | 13 | ENSMUSG00000047777 | Phf13    | 20 |
| ENSMUSG00000008999 | Bmp7       | 13 | ENSMUSG00000029629 | Phf14    | 2  |
| ENSMUSG00000031963 | Bmper      | 16 | ENSMUSG00000026873 | Phf19    | 20 |
| ENSMUSG00000021796 | Bmpr1a     | 20 | ENSMUSG00000038025 | Phf2     | 1  |
| ENSMUSG00000052430 | Bmpr1b     | 20 | ENSMUSG00000038116 | Phf20    | 5  |
| ENSMUSG00000067336 | Bmpr2      | 2  | ENSMUSG00000098506 | Phf20-ps | 20 |
| ENSMUSG00000030138 | Bms1       | 20 | ENSMUSG00000072501 | Phf20l1  | 2  |
| ENSMUSG00000042742 | Bmt2       | 18 | ENSMUSG00000058318 | Phf21a   | 18 |
| ENSMUSG00000031377 | Bmx        | 9  | ENSMUSG00000016624 | Phf21b   | 20 |
| ENSMUSG00000049086 | Bmyc       | 12 | ENSMUSG00000018572 | Phf23    | 20 |
| ENSMUSG00000028487 | Bnc2       | 9  | ENSMUSG00000036062 | Phf24    | 9  |
| ENSMUSG00000024191 | Bnip1      | 20 | ENSMUSG00000086889 | Phf2os1  | 1  |
| ENSMUSG00000011958 | Bnip2      | 18 | ENSMUSG00000048874 | Phf3     | 2  |

|                    |           |    |                    |          |    |
|--------------------|-----------|----|--------------------|----------|----|
| ENSMUSG00000078566 | Bnip3     | 1  | ENSMUSG00000061360 | Phf5a    | 3  |
| ENSMUSG00000022051 | Bnip3l    | 20 | ENSMUSG00000025626 | Phf6     | 20 |
| ENSMUSG00000073198 | Bnip3l-ps | 20 | ENSMUSG00000021902 | Phf7     | 20 |
| ENSMUSG00000022687 | Boc       | 20 | ENSMUSG00000041229 | Phf8     | 2  |
| ENSMUSG00000044502 | Bod1      | 20 | ENSMUSG00000023350 | Phf8-ps  | 20 |
| ENSMUSG00000061755 | Bod1l     | 20 | ENSMUSG00000053398 | Phgdh    | 3  |
| ENSMUSG00000026278 | Bok       | 19 | ENSMUSG00000032253 | Phip     | 2  |
| ENSMUSG00000015943 | Bola1     | 20 | ENSMUSG00000034055 | Phka1    | 20 |
| ENSMUSG00000047721 | Bola2     | 12 | ENSMUSG00000031295 | Phka2    | 3  |
| ENSMUSG00000045160 | Bola3     | 12 | ENSMUSG00000036879 | Phkb     | 1  |
| ENSMUSG00000022557 | Bop1      | 20 | ENSMUSG00000025537 | Phkg1    | 12 |
| ENSMUSG00000022070 | Bora      | 1  | ENSMUSG00000030815 | Phkg2    | 12 |
| ENSMUSG00000042992 | Borcs5    | 20 | ENSMUSG00000020205 | Phlda1   | 18 |
| ENSMUSG00000045176 | Borcs6    | 20 | ENSMUSG00000041801 | Phlda3   | 20 |
| ENSMUSG00000062376 | Borcs7    | 10 | ENSMUSG00000048537 | Phldb1   | 16 |
| ENSMUSG00000002345 | Borcs8    | 20 | ENSMUSG00000033149 | Phldb2   | 13 |
| ENSMUSG00000038871 | Bpgm      | 20 | ENSMUSG00000044340 | Phlpp1   | 16 |
| ENSMUSG00000038286 | Bphl      | 20 | ENSMUSG00000031732 | Phlpp2   | 2  |
| ENSMUSG00000026617 | Bpnt1     | 12 | ENSMUSG00000050860 | Phospho1 | 20 |
| ENSMUSG00000040481 | Bptf      | 2  | ENSMUSG00000027088 | Phospho2 | 20 |
| ENSMUSG00000002413 | Braf      | 2  | ENSMUSG00000036504 | Phpt1    | 12 |
| ENSMUSG00000029458 | Brap      | 20 | ENSMUSG00000038611 | Phrf1    | 6  |
| ENSMUSG00000000148 | Brat1     | 20 | ENSMUSG00000058388 | Phtf1    | 1  |
| ENSMUSG00000017146 | Brca1     | 20 | ENSMUSG00000089998 | Phtf1os  | 20 |
| ENSMUSG00000041147 | Brca2     | 20 | ENSMUSG00000039987 | Phtf2    | 20 |
| ENSMUSG00000031201 | Brcc3     | 9  | ENSMUSG00000031802 | Phxr4    | 5  |
| ENSMUSG00000022387 | Brd1      | 10 | ENSMUSG00000026664 | Phyh     | 9  |
| ENSMUSG00000024335 | Brd2      | 5  | ENSMUSG00000079484 | Phyhd1   | 20 |
| ENSMUSG00000026918 | Brd3      | 20 | ENSMUSG0000003469  | Phyhip   | 9  |
| ENSMUSG00000109946 | Brd3os    | 3  | ENSMUSG00000037747 | Phyhipl  | 3  |
| ENSMUSG00000024002 | Brd4      | 20 | ENSMUSG00000020359 | Phykpl   | 12 |
| ENSMUSG00000031660 | Brd7      | 20 | ENSMUSG00000067780 | Pi15     | 20 |
| ENSMUSG00000003778 | Brd8      | 20 | ENSMUSG00000024011 | Pi16     | 20 |
| ENSMUSG00000057649 | Brd9      | 5  | ENSMUSG00000025178 | Pi4k2a   | 18 |
| ENSMUSG00000029279 | Brdt      | 20 | ENSMUSG00000029186 | Pi4k2b   | 20 |
| ENSMUSG00000011158 | Brf1      | 20 | ENSMUSG00000041720 | Pi4ka    | 3  |
| ENSMUSG00000031487 | Brf2      | 20 | ENSMUSG00000038861 | Pi4kb    | 20 |
| ENSMUSG00000047843 | Bri3      | 20 | ENSMUSG00000030329 | Pianp    | 5  |
| ENSMUSG00000037905 | Bri3bp    | 9  | ENSMUSG00000032405 | Pias1    | 9  |
| ENSMUSG00000045744 | Bricd5    | 20 | ENSMUSG00000025423 | Pias2    | 12 |
| ENSMUSG00000028351 | Brinp1    | 9  | ENSMUSG00000028101 | Pias3    | 9  |
| ENSMUSG00000004031 | Brinp2    | 20 | ENSMUSG00000004934 | Pias4    | 19 |
| ENSMUSG00000035131 | Brinp3    | 9  | ENSMUSG00000022064 | Pibf1    | 20 |
| ENSMUSG00000085208 | Brip1os   | 20 | ENSMUSG00000039361 | Picalm   | 20 |
| ENSMUSG00000022247 | Brix1     | 20 | ENSMUSG00000068206 | Pick1    | 20 |
| ENSMUSG00000033940 | Brk1      | 3  | ENSMUSG00000045658 | Pid1     | 3  |
| ENSMUSG00000080268 | Brms1     | 20 | ENSMUSG00000025507 | Pidd1    | 20 |
| ENSMUSG00000012076 | Brms1l    | 20 | ENSMUSG00000014444 | Piezo1   | 13 |
| ENSMUSG00000046836 | Brox      | 20 | ENSMUSG00000041482 | Piezo2   | 20 |
| ENSMUSG00000001632 | Brpf1     | 20 | ENSMUSG00000041064 | Pif1     | 20 |
| ENSMUSG00000063952 | Brpf3     | 18 | ENSMUSG00000010136 | Pifo     | 20 |
| ENSMUSG00000035390 | Brsk1     | 20 | ENSMUSG00000031381 | Piga     | 16 |
| ENSMUSG00000053046 | Brsk2     | 18 | ENSMUSG00000079469 | Pigb     | 20 |
| ENSMUSG00000022914 | Brwd1     | 7  | ENSMUSG00000026698 | Pigc     | 1  |
| ENSMUSG00000063663 | Brwd3     | 20 | ENSMUSG00000024145 | Pigf     | 20 |

|                    |               |    |                    |         |    |
|--------------------|---------------|----|--------------------|---------|----|
| ENSMUSG00000071657 | Bscl2         | 9  | ENSMUSG00000029263 | Pigg    | 20 |
| ENSMUSG00000040859 | Bsdc1         | 12 | ENSMUSG00000021120 | Pigh    | 20 |
| ENSMUSG00000023175 | Bsg           | 3  | ENSMUSG00000039047 | Pigk    | 20 |
| ENSMUSG00000032589 | Bsn           | 20 | ENSMUSG00000014245 | Pigl    | 20 |
| ENSMUSG00000074378 | Bsph1         | 11 | ENSMUSG00000050229 | Pigm    | 20 |
| ENSMUSG00000028392 | Bspry         | 20 | ENSMUSG00000056536 | Pign    | 20 |
| ENSMUSG00000046718 | Bst2          | 12 | ENSMUSG00000028454 | Pigo    | 20 |
| ENSMUSG00000040565 | Btaf1         | 7  | ENSMUSG00000022940 | Pigp    | 19 |
| ENSMUSG00000025103 | Btbd1         | 20 | ENSMUSG00000025728 | Pigq    | 18 |
| ENSMUSG00000038187 | Btbd10        | 20 | ENSMUSG00000041958 | Pigs    | 18 |
| ENSMUSG00000020042 | Btbd11        | 18 | ENSMUSG00000017721 | Pigt    | 20 |
| ENSMUSG00000040298 | Btbd16        | 20 | ENSMUSG00000038383 | Pigu    | 20 |
| ENSMUSG00000000202 | Btbd17        | 20 | ENSMUSG00000043257 | Pigv    | 7  |
| ENSMUSG00000073771 | Btbd19        | 20 | ENSMUSG00000045140 | Pigw    | 20 |
| ENSMUSG00000003344 | Btbd2         | 20 | ENSMUSG00000023791 | Pigx    | 20 |
| ENSMUSG00000062098 | Btbd3         | 19 | ENSMUSG00000010607 | Pigyl   | 19 |
| ENSMUSG00000002803 | Btbd6         | 20 | ENSMUSG00000045625 | Pigz    | 20 |
| ENSMUSG00000041702 | Btbd7         | 2  | ENSMUSG00000003423 | Pih1d1  | 1  |
| ENSMUSG00000111375 | Btbd8         | 3  | ENSMUSG00000000167 | Pih1d2  | 20 |
| ENSMUSG00000062202 | Btbd9         | 3  | ENSMUSG00000025017 | Pik3ap1 | 20 |
| ENSMUSG00000082361 | Btc           | 20 | ENSMUSG00000030660 | Pik3c2a | 2  |
| ENSMUSG00000021900 | Btd           | 20 | ENSMUSG00000026447 | Pik3c2b | 9  |
| ENSMUSG00000021660 | Btf3          | 20 | ENSMUSG00000030228 | Pik3c2g | 12 |
| ENSMUSG00000028568 | Btf3l4        | 20 | ENSMUSG00000033628 | Pik3c3  | 20 |
| ENSMUSG00000036478 | Btg1          | 20 | ENSMUSG00000027665 | Pik3ca  | 3  |
| ENSMUSG00000020423 | Btg2          | 20 | ENSMUSG00000032462 | Pik3cb  | 20 |
| ENSMUSG00000022863 | Btg3          | 20 | ENSMUSG00000039936 | Pik3cd  | 18 |
| ENSMUSG00000031264 | Btk           | 20 | ENSMUSG00000020573 | Pik3cg  | 6  |
| ENSMUSG00000053216 | Btn2a2        | 20 | ENSMUSG00000034614 | Pik3ip1 | 9  |
| ENSMUSG00000025217 | Btrc          | 18 | ENSMUSG00000041417 | Pik3r1  | 2  |
| ENSMUSG00000040084 | Bub1b         | 6  | ENSMUSG00000031834 | Pik3r2  | 20 |
| ENSMUSG00000066979 | Bub3          | 20 | ENSMUSG00000028698 | Pik3r3  | 20 |
| ENSMUSG00000032077 | Bud13         | 20 | ENSMUSG00000032571 | Pik3r4  | 20 |
| ENSMUSG00000005378 | Bud23         | 20 | ENSMUSG00000020901 | Pik3r5  | 20 |
| ENSMUSG00000038722 | Bud31         | 20 | ENSMUSG00000046207 | Pik3r6  | 9  |
| ENSMUSG00000071317 | Bves          | 6  | ENSMUSG00000025949 | Pikfyve | 2  |
| ENSMUSG00000098098 | Bvht          | 20 | ENSMUSG00000024014 | Pim1    | 19 |
| ENSMUSG00000023988 | Bysl          | 20 | ENSMUSG00000031155 | Pim2    | 20 |
| ENSMUSG00000051223 | Bzw1          | 3  | ENSMUSG00000035828 | Pim3    | 16 |
| ENSMUSG00000020547 | Bzw2          | 20 | ENSMUSG00000032171 | Pin1    | 3  |
| ENSMUSG00000117926 | C030004G16Rik | 20 | ENSMUSG00000079480 | Pin4    | 12 |
| ENSMUSG00000086600 | C030005K06Rik | 20 | ENSMUSG00000028756 | Pink1   | 16 |
| ENSMUSG00000079183 | C030005K15Rik | 9  | ENSMUSG00000021958 | Pinx1   | 20 |
| ENSMUSG00000116138 | C030006K11Rik | 20 | ENSMUSG00000026737 | Pip4k2a | 20 |
| ENSMUSG00000112409 | C030006N10Rik | 20 | ENSMUSG00000018547 | Pip4k2b | 5  |
| ENSMUSG00000085078 | C030013C21Rik | 20 | ENSMUSG00000025417 | Pip4k2c | 20 |
| ENSMUSG00000117314 | C030013G03Rik | 20 | ENSMUSG00000035953 | Pip4p1  | 20 |
| ENSMUSG00000060380 | C030014I23Rik | 20 | ENSMUSG00000028221 | Pip4p2  | 20 |
| ENSMUSG00000108181 | C030015A19Rik | 1  | ENSMUSG00000028126 | Pip5k1a | 9  |
| ENSMUSG00000106469 | C030015E24Rik | 3  | ENSMUSG00000024867 | Pip5k1b | 5  |
| ENSMUSG00000118202 | C030017B01Rik | 9  | ENSMUSG00000034902 | Pip5k1c | 20 |
| ENSMUSG00000107050 | C030017G13Rik | 20 | ENSMUSG00000046854 | Pip5kl1 | 18 |
| ENSMUSG00000105352 | C030018K13Rik | 18 | ENSMUSG00000017453 | Pipox   | 20 |
| ENSMUSG00000110027 | C030029H02Rik | 20 | ENSMUSG00000031379 | Pir     | 14 |
| ENSMUSG00000106063 | C030032O16Rik | 20 | ENSMUSG00000058818 | Pirb    | 20 |



|                    |               |    |                     |          |    |
|--------------------|---------------|----|---------------------|----------|----|
| ENSMUSG0000073374  | C030034I22Rik | 9  | ENSMUSG00000023452  | Pisd     | 20 |
| ENSMUSG0000097365  | C030034L19Rik | 20 | ENSMUSG00000082286  | Pisd-ps1 | 3  |
| ENSMUSG0000087574  | C030037D09Rik | 20 | ENSMUSG00000023795  | Pisd-ps2 | 18 |
| ENSMUSG00000109037 | C030038I04Rik | 18 | ENSMUSG00000028669  | Pithd1   | 20 |
| ENSMUSG0000084873  | C030047K22Rik | 20 | ENSMUSG00000017781  | Pitpna   | 18 |
| ENSMUSG00000103160 | C130012C08Rik | 18 | ENSMUSG00000050017  | Pitpnb   | 20 |
| ENSMUSG00000105509 | C130013H08Rik | 20 | ENSMUSG00000040430  | Pitpnc1  | 18 |
| ENSMUSG00000052951 | C130021I20Rik | 1  | ENSMUSG00000029406  | Pitpnm2  | 9  |
| ENSMUSG00000102854 | C130023A14Rik | 20 | ENSMUSG00000040543  | Pitpnm3  | 1  |
| ENSMUSG00000052848 | C130026L21Rik | 20 | ENSMUSG00000021193  | Pitrm1   | 19 |
| ENSMUSG00000073627 | C130036L24Rik | 20 | ENSMUSG00000028023  | Pitx2    | 18 |
| ENSMUSG00000085154 | C130046K22Rik | 20 | ENSMUSG00000033644  | Piwil2   | 20 |
| ENSMUSG00000044092 | C130050O18Rik | 20 | ENSMUSG00000034403  | Pja1     | 20 |
| ENSMUSG00000114605 | C130051F05Rik | 20 | ENSMUSG00000024083  | Pja2     | 9  |
| ENSMUSG00000097557 | C130060C02Rik | 20 | ENSMUSG00000032855  | Pkd1     | 20 |
| ENSMUSG00000050334 | C130071C03Rik | 4  | ENSMUSG00000048827  | Pkd1I3   | 20 |
| ENSMUSG00000110246 | C130073E24Rik | 9  | ENSMUSG00000034462  | Pkd2     | 20 |
| ENSMUSG00000039349 | C130074G19Rik | 20 | ENSMUSG00000037578  | Pkd2I1   | 1  |
| ENSMUSG00000104735 | C130075A20Rik | 18 | ENSMUSG00000014503  | Pkd2I2   | 20 |
| ENSMUSG00000108812 | C130083A15Rik | 19 | ENSMUSG00000024247  | Pkdcc    | 20 |
| ENSMUSG00000104339 | C130089K02Rik | 20 | ENSMUSG00000052496  | Pkdrej   | 9  |
| ENSMUSG00000000581 | C1d           | 12 | ENSMUSG00000038725  | Pkhd1I1  | 20 |
| ENSMUSG00000042460 | C1galt1       | 20 | ENSMUSG00000027499  | Pkia     | 18 |
| ENSMUSG00000048970 | C1galt1c1     | 20 | ENSMUSG00000019876  | Pkib     | 18 |
| ENSMUSG00000036887 | C1qa          | 5  | ENSMUSG00000035268  | Pkig     | 9  |
| ENSMUSG00000036905 | C1qb          | 12 | ENSMUSG00000032294  | Pkm      | 2  |
| ENSMUSG00000018446 | C1qbp         | 20 | ENSMUSG00000023908  | Pkmyt1   | 20 |
| ENSMUSG00000036896 | C1qc          | 12 | ENSMUSG00000057672  | Pkn1     | 20 |
| ENSMUSG00000045532 | C1qI1         | 20 | ENSMUSG00000004591  | Pkn2     | 12 |
| ENSMUSG00000036907 | C1qI2         | 5  | ENSMUSG00000026785  | Pkn3     | 20 |
| ENSMUSG00000049630 | C1qI3         | 5  | ENSMUSG00000006705  | Pknox1   | 20 |
| ENSMUSG00000017446 | C1qtnf1       | 20 | ENSMUSG00000035934  | Pknox2   | 6  |
| ENSMUSG00000023571 | C1qtnf12      | 3  | ENSMUSG000000041957 | Pkp2     | 5  |
| ENSMUSG00000022440 | C1qtnf6       | 20 | ENSMUSG00000026991  | Pkp4     | 16 |
| ENSMUSG00000024371 | C2            | 1  | ENSMUSG00000002847  | Pla1a    | 20 |
| ENSMUSG00000046219 | C230012O17Rik | 20 | ENSMUSG00000027999  | Pla2g12a | 19 |
| ENSMUSG00000117171 | C230013L11Rik | 20 | ENSMUSG00000031903  | Pla2g15  | 20 |
| ENSMUSG00000087461 | C230014O12Rik | 19 | ENSMUSG00000034579  | Pla2g3   | 20 |
| ENSMUSG00000105202 | C230031I18Rik | 3  | ENSMUSG00000056220  | Pla2g4a  | 1  |
| ENSMUSG00000086181 | C230034O21Rik | 5  | ENSMUSG00000098488  | Pla2g4b  | 20 |
| ENSMUSG00000085024 | C230035I16Rik | 20 | ENSMUSG00000033847  | Pla2g4c  | 20 |
| ENSMUSG00000084915 | C230037L18Rik | 20 | ENSMUSG00000050211  | Pla2g4e  | 19 |
| ENSMUSG00000085560 | C230038L03Rik | 20 | ENSMUSG00000041193  | Pla2g5   | 20 |
| ENSMUSG00000110751 | C230053D17Rik | 20 | ENSMUSG00000042632  | Pla2g6   | 20 |
| ENSMUSG00000110523 | C230057M02Rik | 18 | ENSMUSG00000023913  | Pla2g7   | 2  |
| ENSMUSG00000063623 | C230062I16Rik | 12 | ENSMUSG00000054580  | Pla2r1   | 20 |
| ENSMUSG00000085771 | C230066G23Rik | 20 | ENSMUSG00000028577  | Plaa     | 20 |
| ENSMUSG00000112121 | C230072F16Rik | 20 | ENSMUSG00000022525  | Plaat1   | 1  |
| ENSMUSG00000102212 | C230085N15Rik | 20 | ENSMUSG00000060675  | Plaat3   | 3  |
| ENSMUSG00000115471 | C230086J09Rik | 19 | ENSMUSG00000003282  | Plag1    | 9  |
| ENSMUSG00000106205 | C230096K16Rik | 1  | ENSMUSG00000019817  | Plagl1   | 20 |
| ENSMUSG00000045975 | C2cd2         | 20 | ENSMUSG00000051413  | Plagl2   | 20 |
| ENSMUSG00000032120 | C2cd2I        | 9  | ENSMUSG00000031538  | Plat     | 20 |
| ENSMUSG00000047248 | C2cd3         | 20 | ENSMUSG00000074863  | Platr25  | 20 |
| ENSMUSG00000045912 | C2cd4c        | 1  | ENSMUSG00000021822  | Plau     | 20 |

|                    |                |    |                    |          |    |
|--------------------|----------------|----|--------------------|----------|----|
| ENSMUSG00000030279 | C2cd5          | 9  | ENSMUSG00000046223 | Plaur    | 20 |
| ENSMUSG00000024164 | C3             | 1  | ENSMUSG00000029134 | Plb1     | 20 |
| ENSMUSG00000097930 | C330002G04Rik  | 20 | ENSMUSG00000029598 | Plbd2    | 20 |
| ENSMUSG00000006423 | C330007P06Rik  | 12 | ENSMUSG00000051177 | Plcb1    | 9  |
| ENSMUSG00000056753 | C330011M18Rik  | 14 | ENSMUSG00000040061 | Plcb2    | 20 |
| ENSMUSG00000097093 | C330013E15Rik  | 18 | ENSMUSG00000024960 | Plcb3    | 20 |
| ENSMUSG00000024592 | C330018D20Rik  | 20 | ENSMUSG00000039943 | Plcb4    | 18 |
| ENSMUSG00000040552 | C3ar1          | 20 | ENSMUSG00000010660 | Plcd1    | 20 |
| ENSMUSG00000108359 | C430039J01Rik  | 20 | ENSMUSG00000020937 | Plcd3    | 20 |
| ENSMUSG00000015451 | C4a            | 3  | ENSMUSG00000026173 | Plcd4    | 4  |
| ENSMUSG00000073418 | C4b            | 20 | ENSMUSG00000024998 | Plce1    | 5  |
| ENSMUSG00000085408 | C530005A16Rik  | 20 | ENSMUSG00000016933 | Plcg1    | 20 |
| ENSMUSG00000036377 | C530008M17Rik  | 9  | ENSMUSG00000034330 | Plcg2    | 20 |
| ENSMUSG00000074737 | C530025M09Rik  | 20 | ENSMUSG00000036834 | Plch1    | 18 |
| ENSMUSG00000106706 | C530043K16Rik  | 20 | ENSMUSG00000029055 | Plch2    | 19 |
| ENSMUSG00000107667 | C530044C16Rik  | 20 | ENSMUSG00000038349 | Plcl1    | 9  |
| ENSMUSG00000049130 | C5ar1          | 20 | ENSMUSG00000038910 | Plcl2    | 9  |
| ENSMUSG00000074361 | C5ar2          | 20 | ENSMUSG00000064247 | Plcxd1   | 1  |
| ENSMUSG00000112663 | C630031E19Rik  | 9  | ENSMUSG00000087141 | Plcxd2   | 9  |
| ENSMUSG00000084910 | C630043F03Rik  | 20 | ENSMUSG00000049148 | Plcxd3   | 20 |
| ENSMUSG00000114448 | C630044B11Rik  | 20 | ENSMUSG00000030230 | Plcz1    | 3  |
| ENSMUSG00000079105 | C7             | 20 | ENSMUSG00000027695 | Pld1     | 9  |
| ENSMUSG00000114469 | C730002L08Rik  | 20 | ENSMUSG00000020828 | Pld2     | 20 |
| ENSMUSG00000079242 | C730034F03Rik  | 12 | ENSMUSG00000003363 | Pld3     | 9  |
| ENSMUSG00000107054 | C730045M19Rik  | 2  | ENSMUSG00000055214 | Pld5     | 19 |
| ENSMUSG00000050390 | C77080         | 20 | ENSMUSG00000043648 | Pld6     | 20 |
| ENSMUSG00000087242 | C78197         | 20 | ENSMUSG00000022565 | Plec     | 20 |
| ENSMUSG00000110710 | C78859         | 9  | ENSMUSG00000020120 | Plek     | 20 |
| ENSMUSG00000105741 | C79130         | 20 | ENSMUSG00000040268 | Plekha1  | 20 |
| ENSMUSG00000046679 | C87436         | 20 | ENSMUSG00000031557 | Plekha2  | 1  |
| ENSMUSG00000097574 | C920006O11Rik  | 20 | ENSMUSG00000002733 | Plekha3  | 20 |
| ENSMUSG00000080727 | C920021L13Rik  | 20 | ENSMUSG00000040428 | Plekha4  | 20 |
| ENSMUSG00000028300 | C9orf72        | 20 | ENSMUSG00000030231 | Plekha5  | 9  |
| ENSMUSG00000063897 | CAAA01118383.1 | 9  | ENSMUSG00000041757 | Plekha6  | 18 |
| ENSMUSG00000095742 | CAAA01147332.1 | 20 | ENSMUSG00000045659 | Plekha7  | 18 |
| ENSMUSG00000028578 | Caap1          | 20 | ENSMUSG00000005225 | Plekha8  | 18 |
| ENSMUSG00000036707 | Cab39          | 12 | ENSMUSG00000030701 | Plekha9  | 16 |
| ENSMUSG00000021981 | Cab39I         | 13 | ENSMUSG00000026123 | Plekha10 | 20 |
| ENSMUSG00000019945 | Cabcoco1       | 13 | ENSMUSG00000066438 | Plekhd1  | 18 |
| ENSMUSG00000020196 | Cabin1         | 20 | ENSMUSG00000074170 | Plekhd2  | 20 |
| ENSMUSG00000040957 | Cables1        | 20 | ENSMUSG00000049969 | Plekhd3  | 20 |
| ENSMUSG00000038990 | Cables2        | 18 | ENSMUSG00000040624 | Plekhd4  | 18 |
| ENSMUSG00000029544 | Cabp1          | 9  | ENSMUSG00000037552 | Plekhd5  | 20 |
| ENSMUSG0000009075  | Cabp7          | 5  | ENSMUSG00000052609 | Plekhd6  | 16 |
| ENSMUSG00000024430 | Cabyr          | 12 | ENSMUSG00000014782 | Plekhd7  | 1  |
| ENSMUSG00000015488 | Cacfd1         | 1  | ENSMUSG00000039713 | Plekhd8  | 9  |
| ENSMUSG00000028532 | Cachd1         | 19 | ENSMUSG00000060716 | Plekhd9  | 16 |
| ENSMUSG00000034656 | Cacna1a        | 3  | ENSMUSG00000040852 | Plekhd10 | 1  |
| ENSMUSG00000004113 | Cacna1b        | 16 | ENSMUSG00000035172 | Plekhd11 | 2  |
| ENSMUSG00000051331 | Cacna1c        | 18 | ENSMUSG00000035278 | Plekhd12 | 20 |
| ENSMUSG00000015968 | Cacna1d        | 20 | ENSMUSG00000034247 | Plekhd13 | 20 |
| ENSMUSG00000004110 | Cacna1e        | 9  | ENSMUSG00000028917 | Plekhd14 | 16 |
| ENSMUSG00000020866 | Cacna1g        | 18 | ENSMUSG00000051344 | Plekhd15 | 2  |
| ENSMUSG00000024112 | Cacna1h        | 6  | ENSMUSG00000078485 | Plekhd16 | 2  |
| ENSMUSG00000022416 | Cacna1i        | 9  | ENSMUSG00000015745 | Plekhd17 | 20 |

|                    |          |    |                    |           |    |
|--------------------|----------|----|--------------------|-----------|----|
| ENSMUSG0000026407  | Cacna1s  | 20 | ENSMUSG00000050721 | Plekho2   | 20 |
| ENSMUSG0000040118  | Cacna2d1 | 16 | ENSMUSG00000016495 | Plgrkt    | 1  |
| ENSMUSG00000010066 | Cacna2d2 | 19 | ENSMUSG00000028494 | Plin2     | 20 |
| ENSMUSG00000021991 | Cacna2d3 | 9  | ENSMUSG00000024197 | Plin3     | 20 |
| ENSMUSG00000041460 | Cacna2d4 | 20 | ENSMUSG00000002831 | Plin4     | 20 |
| ENSMUSG00000020882 | Cacnb1   | 9  | ENSMUSG00000011305 | Plin5     | 20 |
| ENSMUSG00000057914 | Cacnb2   | 8  | ENSMUSG00000030867 | Plk1      | 20 |
| ENSMUSG00000003352 | Cacnb3   | 9  | ENSMUSG00000021701 | Plk2      | 9  |
| ENSMUSG00000017412 | Cacnb4   | 7  | ENSMUSG00000028680 | Plk3      | 20 |
| ENSMUSG00000020722 | Cacng1   | 20 | ENSMUSG00000035486 | Plk5      | 1  |
| ENSMUSG00000019146 | Cacng2   | 18 | ENSMUSG00000031775 | Plip      | 16 |
| ENSMUSG00000066189 | Cacng3   | 9  | ENSMUSG00000038583 | Plin      | 20 |
| ENSMUSG00000020723 | Cacng4   | 9  | ENSMUSG00000019055 | Plod1     | 20 |
| ENSMUSG00000040373 | Cacng5   | 18 | ENSMUSG00000032374 | Plod2     | 20 |
| ENSMUSG00000034889 | Cactin   | 20 | ENSMUSG00000004846 | Plod3     | 3  |
| ENSMUSG00000033417 | Cacl1    | 19 | ENSMUSG00000031425 | Plp1      | 16 |
| ENSMUSG00000014226 | Cacybp   | 20 | ENSMUSG00000031146 | Plp2      | 20 |
| ENSMUSG00000013629 | Cad      | 20 | ENSMUSG00000031485 | Plppb     | 20 |
| ENSMUSG00000032076 | Cadm1    | 20 | ENSMUSG00000021759 | Plpp1     | 19 |
| ENSMUSG00000064115 | Cadm2    | 7  | ENSMUSG00000052151 | Plpp2     | 9  |
| ENSMUSG00000005338 | Cadm3    | 1  | ENSMUSG00000028517 | Plpp3     | 1  |
| ENSMUSG00000054793 | Cadm4    | 18 | ENSMUSG00000070366 | Plpp4     | 18 |
| ENSMUSG00000054423 | Cadps    | 19 | ENSMUSG00000031570 | Plpp5     | 20 |
| ENSMUSG00000017978 | Cadps2   | 5  | ENSMUSG00000040105 | Plpp6     | 20 |
| ENSMUSG00000044566 | Cage1    | 20 | ENSMUSG00000051373 | Plpp7     | 2  |
| ENSMUSG00000028222 | Calb1    | 9  | ENSMUSG00000063446 | Plppr1    | 9  |
| ENSMUSG00000003657 | Calb2    | 17 | ENSMUSG00000040563 | Plppr2    | 1  |
| ENSMUSG00000030669 | Calca    | 20 | ENSMUSG00000035835 | Plppr3    | 12 |
| ENSMUSG00000023055 | Calcoco1 | 3  | ENSMUSG00000044667 | Plppr4    | 18 |
| ENSMUSG00000023964 | Calcr    | 20 | ENSMUSG00000033342 | Plppr5    | 6  |
| ENSMUSG00000059588 | Calcr1   | 20 | ENSMUSG00000027998 | Plrg1     | 20 |
| ENSMUSG00000029761 | Cald1    | 20 | ENSMUSG00000049493 | Pls1      | 20 |
| ENSMUSG00000033033 | Calhm2   | 20 | ENSMUSG00000016382 | Pls3      | 19 |
| ENSMUSG00000049872 | Calhm5   | 2  | ENSMUSG00000032369 | Plscr1    | 20 |
| ENSMUSG00000001175 | Calm1    | 9  | ENSMUSG00000032372 | Plscr2    | 20 |
| ENSMUSG00000036438 | Calm2    | 18 | ENSMUSG00000019461 | Plscr3    | 20 |
| ENSMUSG00000019370 | Calm3    | 20 | ENSMUSG00000032377 | Plscr4    | 13 |
| ENSMUSG00000032246 | Calm4    | 13 | ENSMUSG00000017754 | Pltp      | 13 |
| ENSMUSG00000060371 | Caln1    | 9  | ENSMUSG00000034845 | Plvap     | 1  |
| ENSMUSG00000003814 | Calr     | 18 | ENSMUSG00000017417 | Plxdc1    | 2  |
| ENSMUSG00000019732 | Calr3    | 20 | ENSMUSG00000026748 | Plxdc2    | 18 |
| ENSMUSG00000028558 | Calr4    | 16 | ENSMUSG00000030084 | Plxna1    | 19 |
| ENSMUSG00000029767 | Calu     | 20 | ENSMUSG00000026640 | Plxna2    | 7  |
| ENSMUSG00000025468 | Caly     | 3  | ENSMUSG00000031398 | Plxna3    | 9  |
| ENSMUSG00000030272 | Camk1    | 17 | ENSMUSG00000029765 | Plxna4    | 5  |
| ENSMUSG00000039145 | Camk1d   | 9  | ENSMUSG00000086763 | Plxna4os1 | 20 |
| ENSMUSG00000016179 | Camk1g   | 20 | ENSMUSG00000053646 | Plxnb1    | 20 |
| ENSMUSG00000024617 | Camk2a   | 9  | ENSMUSG00000036606 | Plxnb2    | 13 |
| ENSMUSG00000057897 | Camk2b   | 9  | ENSMUSG00000031385 | Plxnb3    | 1  |
| ENSMUSG00000053819 | Camk2d   | 9  | ENSMUSG00000074785 | Plxnc1    | 17 |
| ENSMUSG00000021820 | Camk2g   | 19 | ENSMUSG00000030123 | Plxnd1    | 9  |
| ENSMUSG00000046447 | Camk2n1  | 9  | ENSMUSG00000042251 | Pm20d1    | 10 |
| ENSMUSG00000051146 | Camk2n2  | 18 | ENSMUSG00000054659 | Pm20d2    | 18 |
| ENSMUSG00000038128 | Camk4    | 9  | ENSMUSG00000024521 | Pmaip1    | 20 |
| ENSMUSG00000020785 | Camkk1   | 1  | ENSMUSG00000035383 | Pmch      | 18 |

|                    |         |    |                    |          |    |
|--------------------|---------|----|--------------------|----------|----|
| ENSMUSG0000029471  | Camkk2  | 9  | ENSMUSG00000038400 | Pmepa1   | 9  |
| ENSMUSG00000071037 | Camkmt  | 20 | ENSMUSG00000087600 | Pmepa1os | 20 |
| ENSMUSG00000032936 | Camkv   | 9  | ENSMUSG00000028066 | Pmf1     | 20 |
| ENSMUSG00000021501 | Caml    | 20 | ENSMUSG00000031727 | Pmfbp1   | 18 |
| ENSMUSG00000026933 | Camsap1 | 20 | ENSMUSG00000036986 | Pml      | 20 |
| ENSMUSG00000041570 | Camsap2 | 3  | ENSMUSG00000022474 | Pmm1     | 20 |
| ENSMUSG00000044433 | Camsap3 | 20 | ENSMUSG00000022711 | Pmm2     | 20 |
| ENSMUSG00000014592 | Camta1  | 19 | ENSMUSG00000018217 | Pmp22    | 16 |
| ENSMUSG00000040712 | Camta2  | 5  | ENSMUSG00000026926 | Pmpca    | 13 |
| ENSMUSG00000020114 | Cand1   | 3  | ENSMUSG00000029017 | Pmpcb    | 20 |
| ENSMUSG00000030319 | Cand2   | 20 | ENSMUSG00000026098 | Pms1     | 20 |
| ENSMUSG00000025575 | Cant1   | 20 | ENSMUSG00000079109 | Pms2     | 20 |
| ENSMUSG00000020368 | Canx    | 19 | ENSMUSG00000027952 | Pmvk     | 18 |
| ENSMUSG00000028656 | Cap1    | 9  | ENSMUSG00000002012 | Pnck     | 20 |
| ENSMUSG00000021373 | Cap2    | 9  | ENSMUSG00000028248 | Pnlsr    | 20 |
| ENSMUSG00000056737 | Capg    | 20 | ENSMUSG00000026179 | Pnkd     | 9  |
| ENSMUSG00000024942 | Capn1   | 12 | ENSMUSG00000002963 | Pnkp     | 20 |
| ENSMUSG00000026270 | Capn10  | 20 | ENSMUSG00000073460 | Pnlcd1   | 20 |
| ENSMUSG00000058626 | Capn11  | 20 | ENSMUSG00000046008 | Pnlip    | 20 |
| ENSMUSG00000054083 | Capn12  | 20 | ENSMUSG00000054383 | Pnma1    | 20 |
| ENSMUSG00000037326 | Capn15  | 1  | ENSMUSG00000046204 | Pnma2    | 16 |
| ENSMUSG00000026509 | Capn2   | 1  | ENSMUSG00000046287 | Pnma3    | 19 |
| ENSMUSG00000079110 | Capn3   | 20 | ENSMUSG00000041141 | Pnmal1   | 16 |
| ENSMUSG00000035547 | Capn5   | 20 | ENSMUSG00000070802 | Pnmal2   | 20 |
| ENSMUSG00000067276 | Capn6   | 13 | ENSMUSG00000038216 | Pnmt     | 20 |
| ENSMUSG00000021893 | Capn7   | 20 | ENSMUSG00000020994 | Pnn      | 20 |
| ENSMUSG00000001794 | Capns1  | 7  | ENSMUSG00000020116 | Pno1     | 12 |
| ENSMUSG00000078144 | Capns2  | 20 | ENSMUSG00000045731 | Pnoc     | 6  |
| ENSMUSG00000027184 | Caprin1 | 7  | ENSMUSG00000115338 | Pnp      | 20 |
| ENSMUSG00000030309 | Caprin2 | 9  | ENSMUSG00000068417 | Pnp2     | 19 |
| ENSMUSG00000035694 | Caps2   | 20 | ENSMUSG00000043286 | Pnpla1   | 20 |
| ENSMUSG00000039676 | Capsl   | 14 | ENSMUSG00000025509 | Pnpla2   | 20 |
| ENSMUSG00000070372 | Capza1  | 18 | ENSMUSG00000041653 | Pnpla3   | 20 |
| ENSMUSG00000015733 | Capza2  | 4  | ENSMUSG00000004565 | Pnpla6   | 9  |
| ENSMUSG00000028745 | Capzb   | 12 | ENSMUSG00000036833 | Pnpla7   | 20 |
| ENSMUSG00000056158 | Car10   | 19 | ENSMUSG00000036257 | Pnpla8   | 3  |
| ENSMUSG00000003273 | Car11   | 9  | ENSMUSG00000018659 | Pnpo     | 9  |
| ENSMUSG00000032373 | Car12   | 9  | ENSMUSG00000020464 | Pnpt1    | 20 |
| ENSMUSG00000027555 | Car13   | 20 | ENSMUSG00000040128 | Pnrc1    | 12 |
| ENSMUSG00000038526 | Car14   | 13 | ENSMUSG00000028675 | Pnrc2    | 20 |
| ENSMUSG00000090236 | Car15   | 20 | ENSMUSG00000023345 | Poc1a    | 20 |
| ENSMUSG00000027562 | Car2    | 16 | ENSMUSG00000019952 | Poc1b    | 20 |
| ENSMUSG00000000805 | Car4    | 18 | ENSMUSG00000021671 | Poc5     | 20 |
| ENSMUSG00000031373 | Car5b   | 9  | ENSMUSG00000028600 | Podn     | 13 |
| ENSMUSG00000031883 | Car7    | 20 | ENSMUSG00000025608 | Podxl    | 9  |
| ENSMUSG00000041261 | Car8    | 9  | ENSMUSG00000033152 | Podxl2   | 6  |
| ENSMUSG00000028463 | Car9    | 20 | ENSMUSG00000046020 | Pofut1   | 20 |
| ENSMUSG00000033170 | Card10  | 20 | ENSMUSG00000020260 | Pofut2   | 20 |
| ENSMUSG00000036526 | Card11  | 20 | ENSMUSG00000040596 | Pogk     | 18 |
| ENSMUSG00000037960 | Card19  | 9  | ENSMUSG00000034064 | Poglut1  | 20 |
| ENSMUSG00000041849 | Card6   | 20 | ENSMUSG00000026047 | Poglut2  | 20 |
| ENSMUSG00000026928 | Card9   | 12 | ENSMUSG00000034487 | Poglut3  | 20 |
| ENSMUSG00000026017 | Carf    | 20 | ENSMUSG00000038902 | Pogz     | 6  |
| ENSMUSG00000008393 | Carhsp1 | 20 | ENSMUSG00000006678 | Pola1    | 20 |
| ENSMUSG00000097638 | Carlr   | 20 | ENSMUSG00000024833 | Pola2    | 20 |

|                    |             |    |                    |           |    |
|--------------------|-------------|----|--------------------|-----------|----|
| ENSMUSG00000032185 | Carm1       | 20 | ENSMUSG00000031536 | Polb      | 20 |
| ENSMUSG00000021338 | Carmil1     | 20 | ENSMUSG00000038644 | Pold1     | 20 |
| ENSMUSG00000050357 | Carmil2     | 19 | ENSMUSG00000020471 | Pold2     | 20 |
| ENSMUSG00000022211 | Carmil3     | 9  | ENSMUSG00000030726 | Pold3     | 9  |
| ENSMUSG00000097324 | Carmn       | 20 | ENSMUSG00000001100 | Poldip2   | 20 |
| ENSMUSG00000024726 | Carnmt1     | 20 | ENSMUSG00000041815 | Poldip3   | 20 |
| ENSMUSG00000010755 | Cars        | 18 | ENSMUSG00000007080 | Pole      | 20 |
| ENSMUSG00000056228 | Cars2       | 20 | ENSMUSG00000020974 | Pole2     | 20 |
| ENSMUSG00000021647 | Cartpt      | 17 | ENSMUSG00000028394 | Pole3     | 12 |
| ENSMUSG00000043541 | Casc1       | 20 | ENSMUSG00000030042 | Pole4     | 18 |
| ENSMUSG00000078676 | Casc3       | 20 | ENSMUSG00000039176 | Polg      | 20 |
| ENSMUSG00000060227 | Casc4       | 19 | ENSMUSG00000020718 | Polg2     | 3  |
| ENSMUSG00000015189 | Casd1       | 20 | ENSMUSG00000023953 | Polh      | 20 |
| ENSMUSG00000031012 | Cask        | 2  | ENSMUSG00000038425 | Poli      | 20 |
| ENSMUSG00000033597 | Caskin1     | 19 | ENSMUSG00000021668 | Polk      | 20 |
| ENSMUSG00000034471 | Caskin2     | 20 | ENSMUSG00000025218 | Poll      | 20 |
| ENSMUSG00000025888 | Casp1       | 20 | ENSMUSG00000020474 | Polm      | 20 |
| ENSMUSG00000025887 | Casp12      | 20 | ENSMUSG00000045102 | Poln      | 10 |
| ENSMUSG00000029863 | Casp2       | 20 | ENSMUSG00000034206 | Polq      | 9  |
| ENSMUSG00000031628 | Casp3       | 20 | ENSMUSG00000049553 | Polr1a    | 20 |
| ENSMUSG00000033538 | Casp4       | 12 | ENSMUSG00000027395 | Polr1b    | 5  |
| ENSMUSG00000027997 | Casp6       | 20 | ENSMUSG00000067148 | Polr1c    | 20 |
| ENSMUSG00000025076 | Casp7       | 20 | ENSMUSG00000029642 | Polr1d    | 12 |
| ENSMUSG00000026029 | Casp8       | 17 | ENSMUSG00000028318 | Polr1e    | 13 |
| ENSMUSG00000028282 | Casp8ap2    | 20 | ENSMUSG00000005198 | Polr2a    | 1  |
| ENSMUSG00000028914 | Casp9       | 20 | ENSMUSG00000029250 | Polr2b    | 20 |
| ENSMUSG00000007122 | Casq1       | 20 | ENSMUSG00000031783 | Polr2c    | 20 |
| ENSMUSG00000027861 | Casq2       | 20 | ENSMUSG00000024258 | Polr2d    | 20 |
| ENSMUSG00000074570 | Cass4       | 20 | ENSMUSG00000004667 | Polr2e    | 3  |
| ENSMUSG00000021585 | Cast        | 9  | ENSMUSG00000033020 | Polr2f    | 20 |
| ENSMUSG00000020424 | Castor1     | 4  | ENSMUSG00000071662 | Polr2g    | 10 |
| ENSMUSG00000015944 | Castor2     | 3  | ENSMUSG00000021018 | Polr2h    | 20 |
| ENSMUSG00000028977 | Casz1       | 20 | ENSMUSG00000019738 | Polr2i    | 9  |
| ENSMUSG00000027187 | Cat         | 20 | ENSMUSG00000039771 | Polr2j    | 12 |
| ENSMUSG00000073650 | Catip       | 13 | ENSMUSG00000045996 | Polr2k    | 20 |
| ENSMUSG00000033486 | Catsper2    | 9  | ENSMUSG00000082981 | Polr2k-ps | 20 |
| ENSMUSG00000021499 | Catsper3    | 9  | ENSMUSG00000038489 | Polr2l    | 20 |
| ENSMUSG00000040828 | Catsperd    | 20 | ENSMUSG00000032199 | Polr2m    | 9  |
| ENSMUSG00000091476 | Catspere2   | 12 | ENSMUSG00000025280 | Polr3a    | 9  |
| ENSMUSG00000049676 | Catsperg1   | 20 | ENSMUSG00000034453 | Polr3b    | 20 |
| ENSMUSG00000050623 | Catsperz    | 18 | ENSMUSG00000028099 | Polr3c    | 9  |
| ENSMUSG00000007655 | Cav1        | 20 | ENSMUSG00000000776 | Polr3d    | 20 |
| ENSMUSG00000000058 | Cav2        | 9  | ENSMUSG00000030880 | Polr3e    | 20 |
| ENSMUSG00000004044 | Cavin1      | 20 | ENSMUSG00000027427 | Polr3f    | 20 |
| ENSMUSG00000045954 | Cavin2      | 20 | ENSMUSG00000035834 | Polr3g    | 20 |
| ENSMUSG00000037060 | Cavin3      | 3  | ENSMUSG00000028104 | Polr3gl   | 20 |
| ENSMUSG00000028348 | Cavin4      | 20 | ENSMUSG00000022476 | Polr3h    | 12 |
| ENSMUSG00000035640 | Cbarp       | 12 | ENSMUSG00000038628 | Polr3k    | 20 |
| ENSMUSG00000038533 | Cbfa2t2     | 20 | ENSMUSG00000020329 | Polrmt    | 7  |
| ENSMUSG00000087034 | Cbfa2t2-ps1 | 20 | ENSMUSG00000053293 | Pom121    | 20 |
| ENSMUSG00000006362 | Cbfa2t3     | 18 | ENSMUSG00000020660 | Pomc      | 20 |
| ENSMUSG00000031885 | Cbfb        | 20 | ENSMUSG00000028700 | Pomgnt1   | 12 |
| ENSMUSG00000034342 | Cbl         | 20 | ENSMUSG00000066235 | Pomgnt2   | 20 |
| ENSMUSG00000022637 | Cblb        | 1  | ENSMUSG00000037251 | Pomk      | 20 |
| ENSMUSG00000020659 | Cbll1       | 20 | ENSMUSG00000029649 | Pomp      | 20 |

|                     |           |    |                     |          |    |
|---------------------|-----------|----|---------------------|----------|----|
| ENSMUSG00000031654  | Cbln1     | 9  | ENSMUSG00000039254  | Pomt1    | 1  |
| ENSMUSG00000024647  | Cbln2     | 18 | ENSMUSG00000034126  | Pomt2    | 20 |
| ENSMUSG00000067578  | Cbln4     | 17 | ENSMUSG00000032667  | Pon2     | 20 |
| ENSMUSG00000051483  | Cbr1      | 20 | ENSMUSG00000029759  | Pon3     | 13 |
| ENSMUSG00000022947  | Cbr3      | 9  | ENSMUSG00000022325  | Pop1     | 20 |
| ENSMUSG00000031641  | Cbr4      | 20 | ENSMUSG00000030423  | Pop4     | 20 |
| ENSMUSG00000024039  | Cbs       | 1  | ENSMUSG00000060152  | Pop5     | 12 |
| ENSMUSG00000024878  | Cbwd1     | 20 | ENSMUSG00000029715  | Pop7     | 10 |
| ENSMUSG00000018666  | Cbx1      | 20 | ENSMUSG00000019848  | Popdc3   | 20 |
| ENSMUSG00000025577  | Cbx2      | 20 | ENSMUSG00000005514  | Por      | 20 |
| ENSMUSG00000029836  | Cbx3      | 13 | ENSMUSG00000031169  | Porcn    | 20 |
| ENSMUSG00000057886  | Cbx3-ps6  | 20 | ENSMUSG00000027750  | Postn    | 9  |
| ENSMUSG00000059647  | Cbx3-ps7  | 20 | ENSMUSG00000029676  | Pot1a    | 2  |
| ENSMUSG00000039989  | Cbx4      | 1  | ENSMUSG00000026565  | Pou2f1   | 19 |
| ENSMUSG00000009575  | Cbx5      | 3  | ENSMUSG00000008496  | Pou2f2   | 20 |
| ENSMUSG000000089715 | Cbx6      | 9  | ENSMUSG000000090125 | Pou3f1   | 9  |
| ENSMUSG00000053411  | Cbx7      | 1  | ENSMUSG000000095139 | Pou3f2   | 19 |
| ENSMUSG00000025578  | Cbx8      | 1  | ENSMUSG000000045515 | Pou3f3   | 7  |
| ENSMUSG00000022428  | Cby1      | 20 | ENSMUSG00000056854  | Pou3f4   | 18 |
| ENSMUSG00000036686  | Cc2d1a    | 1  | ENSMUSG00000048349  | Pou4f1   | 1  |
| ENSMUSG00000028582  | Cc2d1b    | 20 | ENSMUSG00000031688  | Pou4f2   | 20 |
| ENSMUSG00000039765  | Cc2d2a    | 19 | ENSMUSG00000093668  | Pou5f2   | 20 |
| ENSMUSG00000108929  | Cc2d2b    | 20 | ENSMUSG00000009739  | Pou6f1   | 6  |
| ENSMUSG00000020074  | Ccar1     | 1  | ENSMUSG00000009734  | Pou6f2   | 9  |
| ENSMUSG00000033712  | Ccar2     | 20 | ENSMUSG00000020089  | Ppa1     | 12 |
| ENSMUSG00000046318  | Ccbe1     | 5  | ENSMUSG00000028013  | Ppa2     | 11 |
| ENSMUSG00000063605  | Ccdc102a  | 20 | ENSMUSG00000004100  | Ppan     | 20 |
| ENSMUSG00000020930  | Ccdc103   | 20 | ENSMUSG00000022383  | Ppara    | 20 |
| ENSMUSG00000078442  | Ccdc105   | 20 | ENSMUSG00000002250  | Ppard    | 18 |
| ENSMUSG00000035228  | Ccdc106   | 19 | ENSMUSG00000000440  | Pparg    | 9  |
| ENSMUSG00000028461  | Ccdc107   | 12 | ENSMUSG00000029167  | Ppargc1a | 12 |
| ENSMUSG00000071104  | Ccdc110   | 20 | ENSMUSG00000033871  | Ppargc1b | 9  |
| ENSMUSG00000071855  | Ccdc112   | 18 | ENSMUSG00000029246  | Ppat     | 20 |
| ENSMUSG00000036598  | Ccdc113   | 13 | ENSMUSG00000063849  | Ppcdc    | 20 |
| ENSMUSG00000040189  | Ccdc114   | 13 | ENSMUSG00000028636  | Ppcs     | 20 |
| ENSMUSG00000042111  | Ccdc115   | 20 | ENSMUSG00000016344  | Ppdf     | 12 |
| ENSMUSG00000022768  | Ccdc116   | 20 | ENSMUSG00000062168  | Ppef1    | 20 |
| ENSMUSG00000020482  | Ccdc117   | 20 | ENSMUSG00000029410  | Ppef2    | 9  |
| ENSMUSG00000019659  | Ccdc12    | 12 | ENSMUSG00000037519  | Ppfia1   | 20 |
| ENSMUSG00000031150  | Ccdc120   | 20 | ENSMUSG00000053825  | Ppfia2   | 5  |
| ENSMUSG00000034795  | Ccdc122   | 20 | ENSMUSG00000003863  | Ppfia3   | 16 |
| ENSMUSG00000007721  | Ccdc124   | 20 | ENSMUSG00000026458  | Ppfia4   | 20 |
| ENSMUSG00000048924  | Ccdc125   | 20 | ENSMUSG00000016487  | Ppfibp1  | 9  |
| ENSMUSG00000050786  | Ccdc126   | 20 | ENSMUSG00000036528  | Ppfibp2  | 16 |
| ENSMUSG00000021578  | Ccdc127   | 20 | ENSMUSG00000036167  | Pphln1   | 9  |
| ENSMUSG00000079235  | Ccdc13    | 18 | ENSMUSG00000071866  | Ppia     | 12 |
| ENSMUSG00000004994  | Ccdc130   | 4  | ENSMUSG00000032383  | Ppib     | 2  |
| ENSMUSG00000068114  | Ccdc134   | 20 | ENSMUSG00000024538  | Ppic     | 20 |
| ENSMUSG00000029769  | Ccdc136   | 18 | ENSMUSG00000027804  | Ppid     | 20 |
| ENSMUSG00000049957  | Ccdc137   | 20 | ENSMUSG00000028651  | Ppie     | 12 |
| ENSMUSG00000038010  | Ccdc138   | 20 | ENSMUSG00000021868  | Ppif     | 20 |
| ENSMUSG00000022833  | Ccdc14    | 20 | ENSMUSG00000042133  | Ppig     | 5  |
| ENSMUSG00000044033  | Ccdc141   | 20 | ENSMUSG00000060288  | Ppih     | 20 |
| ENSMUSG00000107499  | Ccdc142   | 20 | ENSMUSG00000024007  | Ppil1    | 11 |
| ENSMUSG00000087578  | Ccdc142os | 20 | ENSMUSG00000022771  | Ppil2    | 19 |

|                    |           |    |                     |            |    |
|--------------------|-----------|----|---------------------|------------|----|
| ENSMUSG0000064280  | Ccdc146   | 20 | ENSMUSG00000026035  | Ppil3      | 20 |
| ENSMUSG0000036641  | Ccdc148   | 20 | ENSMUSG00000015757  | Ppil4      | 20 |
| ENSMUSG00000045790 | Ccdc149   | 8  | ENSMUSG00000078451  | Ppil6      | 20 |
| ENSMUSG00000034303 | Ccdc15    | 20 | ENSMUSG00000033526  | Ppip5k1    | 20 |
| ENSMUSG00000025983 | Ccdc150   | 20 | ENSMUSG00000040648  | Ppip5k2    | 20 |
| ENSMUSG00000039632 | Ccdc151   | 3  | ENSMUSG00000039457  | Ppl        | 20 |
| ENSMUSG00000070306 | Ccdc153   | 14 | ENSMUSG00000021096  | Ppm1a      | 12 |
| ENSMUSG00000038292 | Ccdc155   | 3  | ENSMUSG00000061130  | Ppm1b      | 20 |
| ENSMUSG00000051427 | Ccdc157   | 19 | ENSMUSG00000020525  | Ppm1d      | 9  |
| ENSMUSG00000050050 | Ccdc158   | 20 | ENSMUSG00000046442  | Ppm1e      | 19 |
| ENSMUSG00000006241 | Ccdc159   | 20 | ENSMUSG00000026181  | Ppm1f      | 20 |
| ENSMUSG00000073207 | Ccdc160   | 20 | ENSMUSG00000029147  | Ppm1g      | 3  |
| ENSMUSG00000075225 | Ccdc162   | 14 | ENSMUSG00000034613  | Ppm1h      | 19 |
| ENSMUSG00000028689 | Ccdc163   | 20 | ENSMUSG00000002228  | Ppm1j      | 20 |
| ENSMUSG00000098176 | Ccdc166   | 20 | ENSMUSG00000037826  | Ppm1k      | 20 |
| ENSMUSG00000024018 | Ccdc167   | 20 | ENSMUSG00000027784  | Ppm1l      | 19 |
| ENSMUSG00000048655 | Ccdc169   | 20 | ENSMUSG00000020253  | Ppm1m      | 20 |
| ENSMUSG00000034035 | Ccdc17    | 20 | ENSMUSG00000030718  | Ppme1      | 20 |
| ENSMUSG00000019767 | Ccdc170   | 14 | ENSMUSG00000099746  | Ppnr       | 18 |
| ENSMUSG00000052407 | Ccdc171   | 3  | ENSMUSG00000062729  | Ppox       | 20 |
| ENSMUSG00000070883 | Ccdc173   | 18 | ENSMUSG00000040385  | Ppp1ca     | 12 |
| ENSMUSG00000034083 | Ccdc174   | 20 | ENSMUSG00000014956  | Ppp1cb     | 9  |
| ENSMUSG00000062961 | Ccdc177   | 2  | ENSMUSG00000004455  | Ppp1cc     | 3  |
| ENSMUSG00000056531 | Ccdc18    | 20 | ENSMUSG000000100153 | Ppp1ccb    | 20 |
| ENSMUSG00000035539 | Ccdc180   | 14 | ENSMUSG00000039220  | Ppp1r10    | 20 |
| ENSMUSG00000026578 | Ccdc181   | 20 | ENSMUSG00000036398  | Ppp1r11    | 11 |
| ENSMUSG00000029875 | Ccdc184   | 17 | ENSMUSG00000019907  | Ppp1r12a   | 2  |
| ENSMUSG00000035173 | Ccdc186   | 20 | ENSMUSG00000073557  | Ppp1r12b   | 16 |
| ENSMUSG00000048038 | Ccdc187   | 9  | ENSMUSG00000019254  | Ppp1r12c   | 3  |
| ENSMUSG00000057176 | Ccdc189   | 18 | ENSMUSG00000021285  | Ppp1r13b   | 20 |
| ENSMUSG00000070532 | Ccdc190   | 20 | ENSMUSG00000040734  | Ppp1r13l   | 20 |
| ENSMUSG00000022701 | Ccdc191   | 1  | ENSMUSG00000037166  | Ppp1r14a   | 16 |
| ENSMUSG00000058925 | Ccdc192   | 20 | ENSMUSG00000056612  | Ppp1r14b   | 20 |
| ENSMUSG00000031143 | Ccdc22    | 20 | ENSMUSG00000040653  | Ppp1r14c   | 20 |
| ENSMUSG00000078588 | Ccdc24    | 20 | ENSMUSG00000040435  | Ppp1r15a   | 20 |
| ENSMUSG00000022035 | Ccdc25    | 20 | ENSMUSG00000046062  | Ppp1r15b   | 20 |
| ENSMUSG00000059554 | Ccdc28a   | 20 | ENSMUSG00000033819  | Ppp1r16a   | 20 |
| ENSMUSG00000028795 | Ccdc28b   | 20 | ENSMUSG00000037754  | Ppp1r16b   | 9  |
| ENSMUSG00000026676 | Ccdc3     | 20 | ENSMUSG00000034595  | Ppp1r18    | 20 |
| ENSMUSG00000028637 | Ccdc30    | 9  | ENSMUSG00000022490  | Ppp1r1a    | 3  |
| ENSMUSG00000039983 | Ccdc32    | 20 | ENSMUSG00000061718  | Ppp1r1b    | 9  |
| ENSMUSG00000037716 | Ccdc33    | 14 | ENSMUSG00000047714  | Ppp1r2     | 9  |
| ENSMUSG00000027160 | Ccdc34    | 20 | ENSMUSG00000099662  | Ppp1r2-ps2 | 9  |
| ENSMUSG00000027676 | Ccdc39    | 18 | ENSMUSG00000058816  | Ppp1r2-ps3 | 20 |
| ENSMUSG00000039963 | Ccdc40    | 20 | ENSMUSG00000059237  | Ppp1r2-ps4 | 20 |
| ENSMUSG00000045915 | Ccdc42    | 19 | ENSMUSG00000095869  | Ppp1r2-ps6 | 9  |
| ENSMUSG00000020925 | Ccdc43    | 18 | ENSMUSG00000034709  | Ppp1r21    | 20 |
| ENSMUSG00000078622 | Ccdc47    | 20 | ENSMUSG00000035829  | Ppp1r26    | 9  |
| ENSMUSG00000038127 | Ccdc50    | 9  | ENSMUSG00000035179  | Ppp1r32    | 14 |
| ENSMUSG00000081553 | Ccdc50-ps | 18 | ENSMUSG00000029725  | Ppp1r35    | 20 |
| ENSMUSG00000025645 | Ccdc51    | 20 | ENSMUSG00000052221  | Ppp1r36    | 20 |
| ENSMUSG00000048445 | Ccdc57    | 20 | ENSMUSG00000051403  | Ppp1r37    | 9  |
| ENSMUSG00000075229 | Ccdc58    | 20 | ENSMUSG00000042717  | Ppp1r3a    | 18 |
| ENSMUSG00000019897 | Ccdc59    | 12 | ENSMUSG00000046794  | Ppp1r3b    | 13 |
| ENSMUSG00000048701 | Ccdc6     | 20 | ENSMUSG00000067279  | Ppp1r3c    | 20 |

|                   |         |    |                   |            |    |
|-------------------|---------|----|-------------------|------------|----|
| ENSMUSG0000043913 | Ccdc60  | 20 | ENSMUSG0000049999 | Ppp1r3d    | 20 |
| ENSMUSG0000074358 | Ccdc61  | 20 | ENSMUSG0000072494 | Ppp1r3e    | 1  |
| ENSMUSG0000061882 | Ccdc62  | 20 | ENSMUSG0000039556 | Ppp1r3f    | 9  |
| ENSMUSG0000003354 | Ccdc65  | 9  | ENSMUSG0000050423 | Ppp1r3g    | 19 |
| ENSMUSG0000046753 | Ccdc66  | 20 | ENSMUSG0000025916 | Ppp1r42    | 20 |
| ENSMUSG0000049588 | Ccdc69  | 9  | ENSMUSG0000026275 | Ppp1r7     | 9  |
| ENSMUSG0000049305 | Ccdc71  | 12 | ENSMUSG0000028882 | Ppp1r8     | 20 |
| ENSMUSG0000090946 | Ccdc71l | 1  | ENSMUSG0000032827 | Ppp1r9a    | 9  |
| ENSMUSG0000045106 | Ccdc73  | 20 | ENSMUSG0000038976 | Ppp1r9b    | 1  |
| ENSMUSG0000041617 | Ccdc74a | 2  | ENSMUSG0000020349 | Ppp2ca     | 20 |
| ENSMUSG0000030177 | Ccdc77  | 12 | ENSMUSG0000009630 | Ppp2cb     | 9  |
| ENSMUSG0000071202 | Ccdc78  | 14 | ENSMUSG0000007564 | Ppp2r1a    | 20 |
| ENSMUSG0000041117 | Ccdc8   | 20 | ENSMUSG0000032058 | Ppp2r1b    | 20 |
| ENSMUSG0000022665 | Ccdc80  | 20 | ENSMUSG0000022052 | Ppp2r2a    | 9  |
| ENSMUSG0000039391 | Ccdc81  | 14 | ENSMUSG0000024500 | Ppp2r2b    | 20 |
| ENSMUSG0000079084 | Ccdc82  | 17 | ENSMUSG0000029120 | Ppp2r2c    | 9  |
| ENSMUSG0000043923 | Ccdc84  | 20 | ENSMUSG0000041769 | Ppp2r2d    | 20 |
| ENSMUSG0000032878 | Ccdc85a | 19 | ENSMUSG0000043154 | Ppp2r3a    | 1  |
| ENSMUSG0000095098 | Ccdc85b | 3  | ENSMUSG0000021022 | Ppp2r3c    | 20 |
| ENSMUSG0000084883 | Ccdc85c | 20 | ENSMUSG0000026626 | Ppp2r5a    | 9  |
| ENSMUSG0000024732 | Ccdc86  | 20 | ENSMUSG0000017843 | Ppp2r5c    | 20 |
| ENSMUSG0000067872 | Ccdc87  | 20 | ENSMUSG0000059409 | Ppp2r5d    | 1  |
| ENSMUSG0000032740 | Ccdc88a | 2  | ENSMUSG0000021051 | Ppp2r5e    | 19 |
| ENSMUSG0000047810 | Ccdc88b | 9  | ENSMUSG0000028161 | Ppp3ca     | 9  |
| ENSMUSG0000021182 | Ccdc88c | 9  | ENSMUSG0000021816 | Ppp3cb     | 4  |
| ENSMUSG0000044362 | Ccdc89  | 20 | ENSMUSG0000022092 | Ppp3cc     | 20 |
| ENSMUSG0000041375 | Ccdc9   | 12 | ENSMUSG0000033953 | Ppp3r1     | 9  |
| ENSMUSG0000030613 | Ccdc90b | 20 | ENSMUSG0000028310 | Ppp3r2     | 20 |
| ENSMUSG0000030301 | Ccdc91  | 6  | ENSMUSG0000030697 | Ppp4c      | 20 |
| ENSMUSG0000037979 | Ccdc92  | 18 | ENSMUSG0000061950 | Ppp4r1     | 20 |
| ENSMUSG0000069814 | Ccdc92b | 9  | ENSMUSG0000055897 | Ppp4r1l-ps | 9  |
| ENSMUSG0000026339 | Ccdc93  | 3  | ENSMUSG0000052144 | Ppp4r2     | 20 |
| ENSMUSG0000050677 | Ccdc96  | 20 | ENSMUSG0000041846 | Ppp4r3a    | 20 |
| ENSMUSG0000002608 | Ccdc97  | 20 | ENSMUSG0000020463 | Ppp4r3b    | 4  |
| ENSMUSG0000045838 | Ccdc9b  | 9  | ENSMUSG0000021209 | Ppp4r4     | 1  |
| ENSMUSG0000096257 | Ccer2   | 9  | ENSMUSG0000003099 | Ppp5c      | 7  |
| ENSMUSG0000040312 | Cchcr1  | 9  | ENSMUSG0000026753 | Ppp6c      | 2  |
| ENSMUSG0000032532 | Cck     | 19 | ENSMUSG0000052296 | Ppp6r1     | 9  |
| ENSMUSG0000029193 | Cckar   | 16 | ENSMUSG0000036561 | Ppp6r2     | 12 |
| ENSMUSG0000030898 | Cckbr   | 20 | ENSMUSG0000024908 | Ppp6r3     | 3  |
| ENSMUSG0000035352 | Ccl12   | 20 | ENSMUSG0000055491 | Pprc1      | 20 |
| ENSMUSG0000031780 | Ccl17   | 20 | ENSMUSG0000028657 | Ppt1       | 20 |
| ENSMUSG0000023235 | Ccl25   | 20 | ENSMUSG0000015474 | Ppt2       | 20 |
| ENSMUSG0000095247 | Ccl27a  | 20 | ENSMUSG0000038582 | Pptc7      | 9  |
| ENSMUSG0000073888 | Ccl27a  | 12 | ENSMUSG0000021713 | Ppwd1      | 20 |
| ENSMUSG0000074715 | Ccl28   | 20 | ENSMUSG0000031157 | Pqbp1      | 2  |
| ENSMUSG0000000982 | Ccl3    | 20 | ENSMUSG0000034006 | Pqlc1      | 9  |
| ENSMUSG0000018927 | Ccl6    | 20 | ENSMUSG0000028744 | Pqlc2      | 20 |
| ENSMUSG0000019122 | Ccl9    | 20 | ENSMUSG0000045679 | Pqlc3      | 20 |
| ENSMUSG0000000378 | Ccm2    | 1  | ENSMUSG0000030008 | Pradc1     | 9  |
| ENSMUSG0000027474 | Ccm2l   | 20 | ENSMUSG0000031149 | Praf2      | 12 |
| ENSMUSG0000028195 | Ccn1    | 1  | ENSMUSG0000050271 | Prag1      | 20 |
| ENSMUSG0000019997 | Ccn2    | 20 | ENSMUSG0000038943 | Prc1       | 20 |
| ENSMUSG0000037362 | Ccn3    | 20 | ENSMUSG0000004895 | Prcc       | 20 |
| ENSMUSG0000005124 | Ccn4    | 1  | ENSMUSG0000075410 | Prccd      | 20 |



|                    |         |    |                    |           |    |
|--------------------|---------|----|--------------------|-----------|----|
| ENSMUSG0000027715  | Ccna2   | 20 | ENSMUSG00000061119 | Prcp      | 20 |
| ENSMUSG0000032218  | Ccnb2   | 20 | ENSMUSG00000038151 | Prdm1     | 20 |
| ENSMUSG0000028252  | Ccnc    | 20 | ENSMUSG00000042496 | Prdm10    | 9  |
| ENSMUSG0000070348  | Ccnd1   | 20 | ENSMUSG00000075028 | Prdm11    | 20 |
| ENSMUSG00000000184 | Ccnd2   | 9  | ENSMUSG00000079466 | Prdm12    | 1  |
| ENSMUSG00000034165 | Ccnd3   | 20 | ENSMUSG00000014039 | Prdm15    | 20 |
| ENSMUSG00000023572 | Ccndbp1 | 20 | ENSMUSG00000039410 | Prdm16    | 13 |
| ENSMUSG00000002068 | Ccne1   | 20 | ENSMUSG00000085069 | Prdm16os  | 9  |
| ENSMUSG00000028212 | Ccne2   | 16 | ENSMUSG00000057637 | Prdm2     | 20 |
| ENSMUSG00000072082 | Ccnf    | 18 | ENSMUSG00000035529 | Prdm4     | 20 |
| ENSMUSG00000020326 | Ccng1   | 19 | ENSMUSG00000029913 | Prdm5     | 20 |
| ENSMUSG00000029385 | Ccng2   | 9  | ENSMUSG00000035456 | Prdm8     | 5  |
| ENSMUSG00000021548 | Ccnh    | 20 | ENSMUSG00000051977 | Prdm9     | 20 |
| ENSMUSG00000063015 | Ccni    | 12 | ENSMUSG00000028691 | Prdx1     | 12 |
| ENSMUSG00000025010 | Ccnj    | 20 | ENSMUSG00000118022 | Prdx1-ps  | 20 |
| ENSMUSG00000044707 | Ccnjl   | 20 | ENSMUSG00000005161 | Prdx2     | 20 |
| ENSMUSG00000021258 | Ccnk    | 20 | ENSMUSG00000082431 | Prdx2-ps1 | 20 |
| ENSMUSG00000027829 | Ccnl1   | 6  | ENSMUSG00000024997 | Prdx3     | 20 |
| ENSMUSG00000029068 | Ccnl2   | 20 | ENSMUSG00000025289 | Prdx4     | 5  |
| ENSMUSG00000042417 | Ccno    | 20 | ENSMUSG00000024953 | Prdx5     | 2  |
| ENSMUSG00000049489 | Ccnq    | 20 | ENSMUSG00000026701 | Prdx6     | 19 |
| ENSMUSG00000011960 | Ccnt1   | 20 | ENSMUSG00000045302 | Preb      | 20 |
| ENSMUSG00000026349 | Ccnt2   | 20 | ENSMUSG00000021486 | Prelid1   | 20 |
| ENSMUSG00000024286 | Ccny    | 20 | ENSMUSG00000024530 | Prelid3a  | 9  |
| ENSMUSG00000070871 | Ccnyl1  | 20 | ENSMUSG00000016257 | Prelid3b  | 1  |
| ENSMUSG00000033904 | Ccp110  | 16 | ENSMUSG00000041577 | Prelp     | 13 |
| ENSMUSG00000034563 | Ccpg1   | 20 | ENSMUSG00000019849 | Prep      | 20 |
| ENSMUSG00000086158 | Ccpg1os | 1  | ENSMUSG00000024127 | Prepl     | 9  |
| ENSMUSG00000079227 | Ccr5    | 20 | ENSMUSG00000039621 | Prex1     | 20 |
| ENSMUSG00000040899 | Ccr6    | 1  | ENSMUSG00000048960 | Prex2     | 9  |
| ENSMUSG00000034108 | Ccs     | 20 | ENSMUSG00000006014 | Prg4      | 19 |
| ENSMUSG00000031971 | Ccsap   | 18 | ENSMUSG00000036158 | Prickle1  | 10 |
| ENSMUSG00000039578 | Ccser1  | 20 | ENSMUSG00000030020 | Prickle2  | 1  |
| ENSMUSG00000058690 | Ccser2  | 3  | ENSMUSG00000031145 | Prickle3  | 20 |
| ENSMUSG00000034024 | Cct2    | 20 | ENSMUSG00000025395 | Prim1     | 20 |
| ENSMUSG00000001416 | Cct3    | 20 | ENSMUSG00000026134 | Prim2     | 20 |
| ENSMUSG00000007739 | Cct4    | 20 | ENSMUSG00000041669 | Prima1    | 9  |
| ENSMUSG00000022234 | Cct5    | 20 | ENSMUSG00000038225 | Primpol   | 18 |
| ENSMUSG00000029447 | Cct6a   | 8  | ENSMUSG00000050697 | Prkaa1    | 20 |
| ENSMUSG00000020698 | Cct6b   | 20 | ENSMUSG00000028518 | Prkaa2    | 19 |
| ENSMUSG00000030007 | Cct7    | 12 | ENSMUSG00000029513 | Prkab1    | 20 |
| ENSMUSG00000025613 | Cct8    | 20 | ENSMUSG00000038205 | Prkab2    | 1  |
| ENSMUSG00000029617 | Ccz1    | 16 | ENSMUSG00000005469 | Prkaca    | 9  |
| ENSMUSG00000086564 | Cd101   | 20 | ENSMUSG00000005034 | Prkacb    | 6  |
| ENSMUSG00000046186 | Cd109   | 20 | ENSMUSG00000067713 | Prkag1    | 20 |
| ENSMUSG00000051439 | Cd14    | 20 | ENSMUSG00000028944 | Prkag2    | 20 |
| ENSMUSG00000025510 | Cd151   | 20 | ENSMUSG00000020612 | Prkar1a   | 9  |
| ENSMUSG00000008845 | Cd163   | 20 | ENSMUSG00000025855 | Prkar1b   | 9  |
| ENSMUSG00000019818 | Cd164   | 20 | ENSMUSG00000032601 | Prkar2a   | 3  |
| ENSMUSG00000028865 | Cd164l2 | 2  | ENSMUSG00000002997 | Prkar2b   | 9  |
| ENSMUSG00000021624 | Cd180   | 9  | ENSMUSG00000050965 | Prkca     | 5  |
| ENSMUSG00000028076 | Cd1d1   | 20 | ENSMUSG00000052889 | Prkcb     | 9  |
| ENSMUSG00000027863 | Cd2     | 20 | ENSMUSG00000021948 | Prkcd     | 18 |
| ENSMUSG00000022661 | Cd200   | 9  | ENSMUSG00000045038 | Prkce     | 9  |
| ENSMUSG00000030577 | Cd22    | 20 | ENSMUSG00000078816 | Prkcg     | 9  |

|                    |         |    |                    |         |    |
|--------------------|---------|----|--------------------|---------|----|
| ENSMUSG0000005763  | Cd247   | 18 | ENSMUSG00000021108 | Prkch   | 20 |
| ENSMUSG00000056481 | Cd248   | 20 | ENSMUSG00000037643 | Prkci   | 9  |
| ENSMUSG00000047139 | Cd24a   | 20 | ENSMUSG00000026778 | Prkccq  | 9  |
| ENSMUSG00000016496 | Cd274   | 20 | ENSMUSG00000003402 | Prkcsh  | 20 |
| ENSMUSG00000035914 | Cd276   | 9  | ENSMUSG00000029053 | Prkcz   | 9  |
| ENSMUSG00000061665 | Cd2ap   | 20 | ENSMUSG00000108314 | Prkcz2  | 3  |
| ENSMUSG00000042502 | Cd2bp2  | 20 | ENSMUSG00000002688 | Prkd1   | 9  |
| ENSMUSG00000034652 | Cd300a  | 20 | ENSMUSG00000041187 | Prkd2   | 3  |
| ENSMUSG00000044811 | Cd300c2 | 20 | ENSMUSG00000024070 | Prkd3   | 20 |
| ENSMUSG00000047798 | Cd300lf | 20 | ENSMUSG00000022672 | Prkdc   | 1  |
| ENSMUSG00000060703 | Cd302   | 9  | ENSMUSG00000052920 | Prkg1   | 20 |
| ENSMUSG00000002308 | Cd320   | 20 | ENSMUSG00000029334 | Prkg2   | 18 |
| ENSMUSG00000004609 | Cd33    | 20 | ENSMUSG00000023826 | Prkn    | 20 |
| ENSMUSG00000016494 | Cd34    | 20 | ENSMUSG00000002731 | Prkra   | 20 |
| ENSMUSG00000002944 | Cd36    | 20 | ENSMUSG00000039737 | Prkrip1 | 10 |
| ENSMUSG00000030798 | Cd37    | 20 | ENSMUSG00000035725 | Prkx    | 20 |
| ENSMUSG00000029084 | Cd38    | 20 | ENSMUSG00000045052 | Prlhr   | 20 |
| ENSMUSG00000047649 | Cd3eap  | 20 | ENSMUSG00000005268 | Prlr    | 13 |
| ENSMUSG00000023274 | Cd4     | 9  | ENSMUSG00000109324 | Prmt1   | 20 |
| ENSMUSG00000005087 | Cd44    | 9  | ENSMUSG00000020230 | Prmt2   | 17 |
| ENSMUSG00000016493 | Cd46    | 9  | ENSMUSG00000030505 | Prmt3   | 20 |
| ENSMUSG00000055447 | Cd47    | 12 | ENSMUSG00000023110 | Prmt5   | 20 |
| ENSMUSG00000015355 | Cd48    | 20 | ENSMUSG00000049300 | Prmt6   | 18 |
| ENSMUSG00000000682 | Cd52    | 9  | ENSMUSG00000060098 | Prmt7   | 20 |
| ENSMUSG00000040747 | Cd53    | 2  | ENSMUSG00000030350 | Prmt8   | 9  |
| ENSMUSG00000026399 | Cd55    | 1  | ENSMUSG00000037134 | Prmt9   | 20 |
| ENSMUSG00000032679 | Cd59a   | 9  | ENSMUSG00000079037 | Prnp    | 9  |
| ENSMUSG00000068686 | Cd59b   | 20 | ENSMUSG00000073600 | Prob1   | 20 |
| ENSMUSG00000025351 | Cd63    | 13 | ENSMUSG00000044122 | Proca1  | 20 |
| ENSMUSG00000085939 | Cd63-ps | 13 | ENSMUSG00000050558 | Prokr2  | 20 |
| ENSMUSG00000018774 | Cd68    | 12 | ENSMUSG00000029086 | Prom1   | 9  |
| ENSMUSG00000028459 | Cd72    | 18 | ENSMUSG00000027376 | Prom2   | 20 |
| ENSMUSG00000024610 | Cd74    | 20 | ENSMUSG00000021023 | Prorp   | 12 |
| ENSMUSG00000075122 | Cd80    | 20 | ENSMUSG00000032673 | Prorsd1 | 20 |
| ENSMUSG00000037706 | Cd81    | 20 | ENSMUSG00000022912 | Prosd1  | 20 |
| ENSMUSG00000027215 | Cd82    | 20 | ENSMUSG00000091154 | Proscos | 20 |
| ENSMUSG00000015396 | Cd83    | 6  | ENSMUSG00000049504 | Proser1 | 20 |
| ENSMUSG00000038147 | Cd84    | 20 | ENSMUSG00000045319 | Proser2 | 20 |
| ENSMUSG00000022901 | Cd86    | 20 | ENSMUSG00000036864 | Proser3 | 20 |
| ENSMUSG00000030342 | Cd9     | 19 | ENSMUSG00000010175 | Prox1   | 19 |
| ENSMUSG00000027435 | Cd93    | 20 | ENSMUSG00000079045 | Prox1os | 20 |
| ENSMUSG00000035776 | Cd99I2  | 3  | ENSMUSG00000042320 | Prox2   | 20 |
| ENSMUSG00000028755 | Cda     | 1  | ENSMUSG00000093629 | Prox2os | 20 |
| ENSMUSG00000021982 | Cdadc1  | 20 | ENSMUSG00000039449 | Prpf18  | 20 |
| ENSMUSG00000027284 | Cdan1   | 20 | ENSMUSG00000024735 | Prpf19  | 2  |
| ENSMUSG00000039128 | Cdc123  | 12 | ENSMUSG00000015748 | Prpf3   | 9  |
| ENSMUSG00000033502 | Cdc14a  | 20 | ENSMUSG00000008373 | Prpf31  | 20 |
| ENSMUSG00000033102 | Cdc14b  | 1  | ENSMUSG00000063800 | Prpf38a | 20 |
| ENSMUSG00000038416 | Cdc16   | 1  | ENSMUSG00000027881 | Prpf38b | 20 |
| ENSMUSG00000006398 | Cdc20   | 20 | ENSMUSG00000035597 | Prpf39  | 20 |
| ENSMUSG00000024370 | Cdc23   | 1  | ENSMUSG00000066148 | Prpf4   | 20 |
| ENSMUSG00000032477 | Cdc25a  | 18 | ENSMUSG00000061136 | Prpf40a | 20 |
| ENSMUSG00000027330 | Cdc25b  | 1  | ENSMUSG00000023007 | Prpf40b | 20 |
| ENSMUSG00000044201 | Cdc25c  | 2  | ENSMUSG00000021413 | Prpf4b  | 20 |
| ENSMUSG00000066149 | Cdc26   | 20 | ENSMUSG0000002455  | Prpf6   | 20 |

|                    |          |    |                    |         |    |
|--------------------|----------|----|--------------------|---------|----|
| ENSMUSG00000020687 | Cdc27    | 20 | ENSMUSG00000020850 | Prpf8   | 20 |
| ENSMUSG00000020307 | Cdc34    | 3  | ENSMUSG00000023484 | Prph    | 19 |
| ENSMUSG00000020870 | Cdc34b   | 1  | ENSMUSG00000031432 | Prps1   | 20 |
| ENSMUSG00000019471 | Cdc37    | 20 | ENSMUSG00000079104 | Prps1l3 | 20 |
| ENSMUSG00000024780 | Cdc37l1  | 20 | ENSMUSG00000025742 | Prps2   | 20 |
| ENSMUSG00000038446 | Cdc40    | 9  | ENSMUSG00000015869 | Prpsap1 | 20 |
| ENSMUSG00000006699 | Cdc42    | 20 | ENSMUSG00000020528 | Prpsap2 | 18 |
| ENSMUSG00000026490 | Cdc42bpa | 12 | ENSMUSG00000020493 | Prr11   | 20 |
| ENSMUSG00000021279 | Cdc42bpb | 20 | ENSMUSG00000046574 | Prr12   | 20 |
| ENSMUSG00000049521 | Cdc42ep1 | 20 | ENSMUSG00000023048 | Prr13   | 18 |
| ENSMUSG00000045664 | Cdc42ep2 | 20 | ENSMUSG00000030822 | Prr14   | 20 |
| ENSMUSG00000036533 | Cdc42ep3 | 9  | ENSMUSG00000054280 | Prr14l  | 7  |
| ENSMUSG00000041598 | Cdc42ep4 | 18 | ENSMUSG00000073565 | Prr16   | 9  |
| ENSMUSG00000046722 | Cdc42se1 | 20 | ENSMUSG00000055945 | Prr18   | 16 |
| ENSMUSG00000052298 | Cdc42se2 | 4  | ENSMUSG00000090273 | Prr22   | 18 |
| ENSMUSG00000000028 | Cdc45    | 20 | ENSMUSG00000038500 | Prr3    | 20 |
| ENSMUSG00000023932 | Cdc5l    | 20 | ENSMUSG00000037086 | Prr32   | 13 |
| ENSMUSG00000017499 | Cdc6     | 20 | ENSMUSG00000064125 | Prr36   | 20 |
| ENSMUSG00000029283 | Cdc7     | 20 | ENSMUSG00000036106 | Prr5    | 20 |
| ENSMUSG00000026361 | Cdc73    | 2  | ENSMUSG00000032841 | Prr5l   | 20 |
| ENSMUSG00000048922 | Cdca2    | 20 | ENSMUSG00000034686 | Prr7    | 18 |
| ENSMUSG00000023505 | Cdca3    | 20 | ENSMUSG00000024594 | Prrc1   | 9  |
| ENSMUSG00000047832 | Cdca4    | 20 | ENSMUSG00000024393 | Prrc2a  | 20 |
| ENSMUSG00000055612 | Cdca7    | 20 | ENSMUSG00000039262 | Prrc2b  | 20 |
| ENSMUSG00000021175 | Cdca7l   | 9  | ENSMUSG00000040225 | Prrc2c  | 2  |
| ENSMUSG00000028873 | Cdca8    | 20 | ENSMUSG00000047996 | Prrg1   | 3  |
| ENSMUSG00000035498 | Cdcp1    | 20 | ENSMUSG0000007837  | Prrg2   | 20 |
| ENSMUSG00000000303 | Cdh1     | 20 | ENSMUSG00000033361 | Prrg3   | 20 |
| ENSMUSG00000022321 | Cdh10    | 2  | ENSMUSG00000027171 | Prrg4   | 12 |
| ENSMUSG00000031673 | Cdh11    | 12 | ENSMUSG00000015476 | Prrt1   | 9  |
| ENSMUSG00000040452 | Cdh12    | 3  | ENSMUSG00000045114 | Prrt2   | 20 |
| ENSMUSG00000031841 | Cdh13    | 1  | ENSMUSG00000045009 | Prrt3   | 20 |
| ENSMUSG00000031962 | Cdh15    | 20 | ENSMUSG00000079654 | Prrt4   | 1  |
| ENSMUSG00000040420 | Cdh18    | 3  | ENSMUSG00000026586 | Prrx1   | 20 |
| ENSMUSG00000047216 | Cdh19    | 9  | ENSMUSG00000041730 | Prrxl1  | 20 |
| ENSMUSG00000024304 | Cdh2     | 19 | ENSMUSG00000027978 | Prss12  | 20 |
| ENSMUSG00000050840 | Cdh20    | 3  | ENSMUSG00000006179 | Prss16  | 1  |
| ENSMUSG00000053166 | Cdh22    | 6  | ENSMUSG00000039405 | Prss23  | 18 |
| ENSMUSG00000012819 | Cdh23    | 9  | ENSMUSG00000033491 | Prss35  | 20 |
| ENSMUSG00000059674 | Cdh24    | 6  | ENSMUSG00000070371 | Prss36  | 9  |
| ENSMUSG00000061048 | Cdh3     | 13 | ENSMUSG00000024114 | Prss41  | 20 |
| ENSMUSG00000000305 | Cdh4     | 1  | ENSMUSG00000048752 | Prss50  | 20 |
| ENSMUSG00000031871 | Cdh5     | 18 | ENSMUSG00000044139 | Prss53  | 20 |
| ENSMUSG00000039385 | Cdh6     | 18 | ENSMUSG00000036480 | Prss56  | 20 |
| ENSMUSG00000026312 | Cdh7     | 20 | ENSMUSG00000036030 | Prtg    | 20 |
| ENSMUSG00000036510 | Cdh8     | 7  | ENSMUSG00000057729 | Prtn3   | 20 |
| ENSMUSG00000025370 | Cdh9     | 9  | ENSMUSG00000015711 | Prune1  | 13 |
| ENSMUSG00000021803 | Cdhr1    | 9  | ENSMUSG00000039126 | Prune2  | 18 |
| ENSMUSG00000035860 | Cdhr3    | 20 | ENSMUSG00000053198 | Prx     | 20 |
| ENSMUSG00000032595 | Cdhr4    | 14 | ENSMUSG00000021792 | Prxl2a  | 20 |
| ENSMUSG0000004071  | Cdip1    | 20 | ENSMUSG00000029059 | Prxl2b  | 2  |
| ENSMUSG00000030682 | Cdipt    | 20 | ENSMUSG00000021482 | Prxl2c  | 20 |
| ENSMUSG00000033862 | Cdk10    | 20 | ENSMUSG00000004207 | Psap    | 20 |
| ENSMUSG00000029062 | Cdk11b   | 20 | ENSMUSG00000024640 | Psat1   | 15 |
| ENSMUSG00000003119 | Cdk12    | 2  | ENSMUSG00000037126 | Psd     | 9  |

|                    |            |    |                    |         |    |
|--------------------|------------|----|--------------------|---------|----|
| ENSMUSG00000041297 | Cdk13      | 20 | ENSMUSG00000024347 | Psd2    | 13 |
| ENSMUSG00000028926 | Cdk14      | 19 | ENSMUSG00000030465 | Psd3    | 4  |
| ENSMUSG00000026023 | Cdk15      | 1  | ENSMUSG00000026979 | Psd4    | 20 |
| ENSMUSG00000031065 | Cdk16      | 18 | ENSMUSG00000019969 | Psen1   | 20 |
| ENSMUSG00000020015 | Cdk17      | 9  | ENSMUSG00000010609 | Psen2   | 20 |
| ENSMUSG00000026437 | Cdk18      | 18 | ENSMUSG00000036835 | Psenen  | 19 |
| ENSMUSG00000038481 | Cdk19      | 9  | ENSMUSG00000066760 | Psg16   | 9  |
| ENSMUSG00000025358 | Cdk2       | 20 | ENSMUSG00000028484 | Psip1   | 9  |
| ENSMUSG00000021483 | Cdk20      | 20 | ENSMUSG00000048310 | Pskh1   | 20 |
| ENSMUSG00000029394 | Cdk2ap1    | 1  | ENSMUSG00000030751 | Psma1   | 20 |
| ENSMUSG00000092300 | Cdk3       | 20 | ENSMUSG00000015671 | Psma2   | 20 |
| ENSMUSG00000006728 | Cdk4       | 3  | ENSMUSG00000060073 | Psma3   | 20 |
| ENSMUSG00000028969 | Cdk5       | 2  | ENSMUSG00000032301 | Psma4   | 12 |
| ENSMUSG00000048895 | Cdk5r1     | 20 | ENSMUSG00000068749 | Psma5   | 20 |
| ENSMUSG00000090071 | Cdk5r2     | 9  | ENSMUSG00000021024 | Psma6   | 12 |
| ENSMUSG00000027487 | Cdk5rap1   | 13 | ENSMUSG00000027566 | Psma7   | 12 |
| ENSMUSG00000039298 | Cdk5rap2   | 15 | ENSMUSG00000014769 | Psmb1   | 12 |
| ENSMUSG00000018669 | Cdk5rap3   | 2  | ENSMUSG00000031897 | Psmb10  | 20 |
| ENSMUSG00000040274 | Cdk6       | 20 | ENSMUSG00000028837 | Psmb2   | 10 |
| ENSMUSG00000069089 | Cdk7       | 1  | ENSMUSG00000069744 | Psmb3   | 12 |
| ENSMUSG00000029635 | Cdk8       | 9  | ENSMUSG00000005779 | Psmb4   | 12 |
| ENSMUSG00000009555 | Cdk9       | 20 | ENSMUSG00000022193 | Psmb5   | 12 |
| ENSMUSG00000006191 | Cdkal1     | 20 | ENSMUSG00000018286 | Psmb6   | 12 |
| ENSMUSG00000020990 | Cdkl1      | 19 | ENSMUSG00000026750 | Psmb7   | 20 |
| ENSMUSG00000029403 | Cdkl2      | 1  | ENSMUSG00000024338 | Psmb8   | 20 |
| ENSMUSG00000020389 | Cdkl3      | 20 | ENSMUSG00000096727 | Psmb9   | 10 |
| ENSMUSG00000033966 | Cdkl4      | 18 | ENSMUSG00000021178 | Psmc1   | 20 |
| ENSMUSG00000031292 | Cdkl5      | 20 | ENSMUSG00000028932 | Psmc2   | 1  |
| ENSMUSG00000023067 | Cdkn1a     | 10 | ENSMUSG0000002102  | Psmc3   | 7  |
| ENSMUSG0000003031  | Cdkn1b     | 18 | ENSMUSG00000019303 | Psmc3ip | 20 |
| ENSMUSG00000037664 | Cdkn1c     | 13 | ENSMUSG00000030603 | Psmc4   | 12 |
| ENSMUSG00000044303 | Cdkn2a     | 20 | ENSMUSG00000020708 | Psmc5   | 20 |
| ENSMUSG00000038069 | Cdkn2aip   | 20 | ENSMUSG00000021832 | Psmc6   | 20 |
| ENSMUSG00000020392 | Cdkn2aipnl | 20 | ENSMUSG00000026229 | Psmc1   | 1  |
| ENSMUSG00000028551 | Cdkn2c     | 20 | ENSMUSG00000017428 | Psmc11  | 18 |
| ENSMUSG00000096472 | Cdkn2d     | 20 | ENSMUSG00000020720 | Psmc12  | 20 |
| ENSMUSG00000039496 | Cdnf       | 20 | ENSMUSG00000025487 | Psmc13  | 5  |
| ENSMUSG00000033022 | Cdo1       | 18 | ENSMUSG00000026914 | Psmc14  | 16 |
| ENSMUSG00000038119 | Cdon       | 18 | ENSMUSG00000006998 | Psmc2   | 20 |
| ENSMUSG00000064284 | Cdpf1      | 19 | ENSMUSG00000017221 | Psmc3   | 12 |
| ENSMUSG00000090546 | Cdr1       | 18 | ENSMUSG00000005625 | Psmc4   | 12 |
| ENSMUSG00000071753 | Cdr1os     | 18 | ENSMUSG00000026869 | Psmc5   | 1  |
| ENSMUSG00000030878 | Cdr2       | 16 | ENSMUSG00000021737 | Psmc6   | 18 |
| ENSMUSG00000050910 | Cdr2l      | 9  | ENSMUSG00000039067 | Psmc7   | 20 |
| ENSMUSG00000029330 | Cds1       | 18 | ENSMUSG00000030591 | Psmc8   | 20 |
| ENSMUSG00000058793 | Cds2       | 18 | ENSMUSG00000029440 | Psmc9   | 3  |
| ENSMUSG0000006585  | Cdt1       | 20 | ENSMUSG00000022216 | Psme1   | 20 |
| ENSMUSG00000032803 | Cdv3       | 9  | ENSMUSG00000079197 | Psme2   | 12 |
| ENSMUSG00000090389 | Cdv3-ps    | 20 | ENSMUSG00000078652 | Psme3   | 12 |
| ENSMUSG00000059288 | Cdyl       | 4  | ENSMUSG00000040850 | Psme4   | 11 |
| ENSMUSG00000031758 | Cdyl2      | 20 | ENSMUSG00000032869 | Psmf1   | 20 |
| ENSMUSG00000074272 | Ceacam1    | 20 | ENSMUSG00000022913 | Psmg1   | 20 |
| ENSMUSG00000054385 | Ceacam2    | 20 | ENSMUSG00000024537 | Psmg2   | 12 |
| ENSMUSG00000034957 | Cebpa      | 20 | ENSMUSG00000029551 | Psmg3   | 12 |
| ENSMUSG00000056501 | Cebpb      | 20 | ENSMUSG00000071451 | Psmg4   | 19 |

|                    |          |    |                    |           |    |
|--------------------|----------|----|--------------------|-----------|----|
| ENSMUSG00000071637 | Cebpd    | 20 | ENSMUSG00000021938 | Pspc1     | 20 |
| ENSMUSG00000056216 | Cebpg    | 10 | ENSMUSG00000029446 | Psph      | 20 |
| ENSMUSG00000024081 | Cebpz    | 20 | ENSMUSG00000068744 | Psrc1     | 20 |
| ENSMUSG00000062691 | Cebpzoz  | 12 | ENSMUSG00000063179 | Pstk      | 20 |
| ENSMUSG00000071226 | Cecr2    | 5  | ENSMUSG00000032322 | Pstpip1   | 9  |
| ENSMUSG00000023031 | Cela1    | 20 | ENSMUSG00000056529 | Ptafr     | 20 |
| ENSMUSG00000002107 | Celf2    | 9  | ENSMUSG00000074925 | Ptar1     | 3  |
| ENSMUSG00000028137 | Celf3    | 9  | ENSMUSG00000006498 | Ptbp1     | 20 |
| ENSMUSG00000024268 | Celf4    | 16 | ENSMUSG00000028134 | Ptbp2     | 1  |
| ENSMUSG00000034818 | Celf5    | 18 | ENSMUSG00000028382 | Ptbp3     | 7  |
| ENSMUSG00000032297 | Celf6    | 20 | ENSMUSG00000029624 | Ptcd1     | 1  |
| ENSMUSG00000097881 | Celrr    | 20 | ENSMUSG00000021650 | Ptcd2     | 20 |
| ENSMUSG00000016028 | Celrs1   | 20 | ENSMUSG00000063884 | Ptcd3     | 20 |
| ENSMUSG00000068740 | Celrs2   | 10 | ENSMUSG00000021466 | Ptch1     | 20 |
| ENSMUSG00000052353 | Cemip    | 5  | ENSMUSG00000028681 | Ptch2     | 1  |
| ENSMUSG00000024754 | Cemip2   | 20 | ENSMUSG00000041552 | Ptchd1    | 9  |
| ENSMUSG00000060240 | Cend1    | 9  | ENSMUSG00000042256 | Ptchd4    | 2  |
| ENSMUSG00000029177 | Cenpa    | 20 | ENSMUSG00000021518 | Ptdss1    | 20 |
| ENSMUSG00000068267 | Cenpb    | 20 | ENSMUSG00000025495 | Ptdss2    | 20 |
| ENSMUSG00000029253 | Cenpc1   | 20 | ENSMUSG00000013663 | Pten      | 2  |
| ENSMUSG00000045328 | Cenpe    | 20 | ENSMUSG00000026730 | Pter      | 20 |
| ENSMUSG00000026605 | Cenpf    | 20 | ENSMUSG00000015090 | Ptgds     | 4  |
| ENSMUSG00000045273 | Cenph    | 20 | ENSMUSG00000019464 | Ptger1    | 20 |
| ENSMUSG00000031262 | Cenpi    | 3  | ENSMUSG00000040016 | Ptger3    | 9  |
| ENSMUSG00000064128 | Cenpj    | 20 | ENSMUSG00000039942 | Ptger4    | 20 |
| ENSMUSG00000021714 | Cenpk    | 20 | ENSMUSG00000050737 | Ptges     | 12 |
| ENSMUSG00000026708 | Cenpl    | 20 | ENSMUSG00000026820 | Ptges2    | 20 |
| ENSMUSG00000068101 | Cenpm    | 20 | ENSMUSG00000071072 | Ptges3    | 20 |
| ENSMUSG00000031756 | Cenpn    | 20 | ENSMUSG00000040078 | Ptges3-ps | 20 |
| ENSMUSG00000020652 | Cenpo    | 20 | ENSMUSG00000097487 | Ptges3l   | 9  |
| ENSMUSG00000021391 | Cenpp    | 20 | ENSMUSG00000028036 | Ptgrfr    | 20 |
| ENSMUSG00000023919 | Cenpq    | 9  | ENSMUSG00000027864 | Ptgrfrn   | 20 |
| ENSMUSG00000073705 | Cenps    | 20 | ENSMUSG00000017969 | Ptgis     | 20 |
| ENSMUSG00000036672 | Cenpt    | 20 | ENSMUSG00000028378 | Ptgr1     | 20 |
| ENSMUSG00000031629 | Cenpu    | 20 | ENSMUSG00000072946 | Ptgr2     | 1  |
| ENSMUSG00000018509 | Cenpv    | 20 | ENSMUSG00000047250 | Ptgs1     | 20 |
| ENSMUSG00000075266 | Cenpw    | 12 | ENSMUSG00000032487 | Ptgs2     | 5  |
| ENSMUSG00000025144 | Cenpx    | 20 | ENSMUSG00000032492 | Pth1r     | 9  |
| ENSMUSG00000039523 | Cep104   | 20 | ENSMUSG00000025946 | Pth2r     | 20 |
| ENSMUSG00000020728 | Cep112   | 1  | ENSMUSG00000048776 | Pthlh     | 9  |
| ENSMUSG00000085811 | Cep112it | 19 | ENSMUSG00000022607 | Ptk2      | 20 |
| ENSMUSG00000048799 | Cep120   | 1  | ENSMUSG00000059456 | Ptk2b     | 9  |
| ENSMUSG00000040729 | Cep126   | 9  | ENSMUSG00000023972 | Ptk7      | 9  |
| ENSMUSG00000061533 | Cep128   | 1  | ENSMUSG00000026238 | Ptma      | 1  |
| ENSMUSG00000039781 | Cep131   | 6  | ENSMUSG00000030122 | Ptms      | 3  |
| ENSMUSG00000036403 | Cep135   | 20 | ENSMUSG00000029838 | Ptn       | 3  |
| ENSMUSG00000068394 | Cep152   | 20 | ENSMUSG00000038502 | Ptov1     | 3  |
| ENSMUSG00000056919 | Cep162   | 1  | ENSMUSG00000117310 | Ptp4a1    | 20 |
| ENSMUSG00000043987 | Cep164   | 1  | ENSMUSG00000026064 | Ptp4a1    | 20 |
| ENSMUSG00000057335 | Cep170   | 3  | ENSMUSG00000028788 | Ptp4a2    | 8  |
| ENSMUSG00000072825 | Cep170b  | 20 | ENSMUSG00000059895 | Ptp4a3    | 20 |
| ENSMUSG00000035790 | Cep19    | 9  | ENSMUSG00000039515 | Ptpa      | 9  |
| ENSMUSG00000024542 | Cep192   | 20 | ENSMUSG00000038042 | Ptpdc1    | 1  |
| ENSMUSG00000038241 | Cep250   | 20 | ENSMUSG00000027540 | Ptpn1     | 1  |
| ENSMUSG00000019971 | Cep290   | 16 | ENSMUSG00000043733 | Ptpn11    | 8  |

|                    |          |    |                    |         |    |
|--------------------|----------|----|--------------------|---------|----|
| ENSMUSG0000046111  | Cep295   | 9  | ENSMUSG00000028771 | Ptpn12  | 20 |
| ENSMUSG0000076433  | Cep295nl | 3  | ENSMUSG00000034573 | Ptpn13  | 20 |
| ENSMUSG00000033671 | Cep350   | 19 | ENSMUSG00000026604 | Ptpn14  | 13 |
| ENSMUSG00000029790 | Cep41    | 20 | ENSMUSG00000026126 | Ptpn18  | 20 |
| ENSMUSG00000038215 | Cep44    | 20 | ENSMUSG00000024539 | Ptpn2   | 20 |
| ENSMUSG00000024989 | Cep55    | 20 | ENSMUSG00000021009 | Ptpn21  | 9  |
| ENSMUSG00000031922 | Cep57    | 20 | ENSMUSG00000027843 | Ptpn22  | 20 |
| ENSMUSG00000019813 | Cep57l1  | 18 | ENSMUSG00000036057 | Ptpn23  | 9  |
| ENSMUSG00000032534 | Cep63    | 9  | ENSMUSG00000038764 | Ptpn3   | 18 |
| ENSMUSG00000044066 | Cep68    | 20 | ENSMUSG00000026384 | Ptpn4   | 18 |
| ENSMUSG00000056267 | Cep70    | 20 | ENSMUSG00000030854 | Ptpn5   | 9  |
| ENSMUSG00000021572 | Cep72    | 20 | ENSMUSG00000004266 | Ptpn6   | 20 |
| ENSMUSG00000073542 | Cep76    | 19 | ENSMUSG00000031506 | Ptpn7   | 1  |
| ENSMUSG00000041491 | Cep78    | 20 | ENSMUSG00000032290 | Ptpn9   | 20 |
| ENSMUSG00000020024 | Cep83    | 9  | ENSMUSG00000027303 | Ptpna   | 20 |
| ENSMUSG00000097164 | Cep83os  | 20 | ENSMUSG00000020154 | Ptpnb   | 20 |
| ENSMUSG00000037443 | Cep85    | 20 | ENSMUSG00000026395 | Ptpnc   | 20 |
| ENSMUSG00000038594 | Cep85l   | 19 | ENSMUSG00000028399 | Ptpnd   | 16 |
| ENSMUSG00000023072 | Cep89    | 18 | ENSMUSG00000041836 | Ptpne   | 9  |
| ENSMUSG00000018372 | Cep95    | 20 | ENSMUSG00000033295 | Ptpnf   | 20 |
| ENSMUSG00000022604 | Cep97    | 20 | ENSMUSG00000021745 | Ptpng   | 5  |
| ENSMUSG00000040774 | Cept1    | 20 | ENSMUSG00000035429 | Ptpnh   | 20 |
| ENSMUSG00000039787 | Cercam   | 20 | ENSMUSG00000025314 | Ptpnj   | 20 |
| ENSMUSG00000035891 | Cerk     | 18 | ENSMUSG00000019889 | Ptpnk   | 20 |
| ENSMUSG00000075256 | Cerkl    | 20 | ENSMUSG00000033278 | Ptpnm   | 12 |
| ENSMUSG00000087408 | Cers1    | 9  | ENSMUSG00000026204 | Ptpnn   | 6  |
| ENSMUSG00000015714 | Cers2    | 15 | ENSMUSG00000056553 | Ptpn2   | 9  |
| ENSMUSG00000008206 | Cers4    | 9  | ENSMUSG00000030223 | Ptpno   | 4  |
| ENSMUSG00000023021 | Cers5    | 1  | ENSMUSG00000020151 | Ptpnr   | 20 |
| ENSMUSG00000027035 | Cers6    | 4  | ENSMUSG00000013236 | Ptpns   | 1  |
| ENSMUSG00000058019 | Ces5a    | 20 | ENSMUSG00000053141 | Ptpnt   | 20 |
| ENSMUSG00000031347 | Cetn2    | 20 | ENSMUSG00000028909 | Ptpnu   | 17 |
| ENSMUSG00000021537 | Cetn3    | 12 | ENSMUSG00000097993 | Ptpnv   | 9  |
| ENSMUSG00000045031 | Cetn4    | 20 | ENSMUSG00000068748 | Ptpnz1  | 19 |
| ENSMUSG00000048794 | Cfap100  | 20 | ENSMUSG00000053746 | Ptrh1   | 20 |
| ENSMUSG00000026649 | Cfap126  | 20 | ENSMUSG00000072582 | Ptrh2   | 20 |
| ENSMUSG00000038987 | Cfap157  | 20 | ENSMUSG00000096199 | Ptrhd1  | 3  |
| ENSMUSG00000011154 | Cfap161  | 14 | ENSMUSG00000032067 | Pts     | 12 |
| ENSMUSG00000031796 | Cfap20   | 3  | ENSMUSG00000020415 | Pttg1   | 20 |
| ENSMUSG00000028294 | Cfap206  | 14 | ENSMUSG00000009291 | Pttg1ip | 3  |
| ENSMUSG00000036962 | Cfap221  | 20 | ENSMUSG00000002524 | Puf60   | 3  |
| ENSMUSG00000022972 | Cfap298  | 20 | ENSMUSG00000028580 | Pum1    | 7  |
| ENSMUSG00000053070 | Cfap300  | 14 | ENSMUSG00000020594 | Pum2    | 7  |
| ENSMUSG00000020462 | Cfap36   | 12 | ENSMUSG00000041360 | Pum3    | 12 |
| ENSMUSG00000020284 | Cfap410  | 20 | ENSMUSG00000043991 | Pura    | 3  |
| ENSMUSG00000044948 | Cfap43   | 14 | ENSMUSG00000094483 | Purb    | 12 |
| ENSMUSG00000071550 | Cfap44   | 14 | ENSMUSG00000049184 | Purg    | 19 |
| ENSMUSG00000026546 | Cfap45   | 13 | ENSMUSG00000029507 | Pus1    | 9  |
| ENSMUSG00000049571 | Cfap46   | 1  | ENSMUSG00000020280 | Pus10   | 20 |
| ENSMUSG00000073077 | Cfap47   | 13 | ENSMUSG00000032103 | Pus3    | 20 |
| ENSMUSG00000020904 | Cfap52   | 14 | ENSMUSG00000057541 | Pus7    | 20 |
| ENSMUSG00000035394 | Cfap53   | 20 | ENSMUSG00000033356 | Pus7l   | 20 |
| ENSMUSG00000020014 | Cfap54   | 14 | ENSMUSG00000051557 | Pusl1   | 20 |
| ENSMUSG00000028730 | Cfap57   | 20 | ENSMUSG00000005716 | Pvalb   | 16 |
| ENSMUSG00000037143 | Cfap61   | 14 | ENSMUSG00000040511 | Pvr     | 1  |

|                    |           |    |                    |            |    |
|--------------------|-----------|----|--------------------|------------|----|
| ENSMUSG0000047021  | Cfap65    | 14 | ENSMUSG00000097039 | Pvt1       | 20 |
| ENSMUSG0000040473  | Cfap69    | 20 | ENSMUSG00000001785 | Pwp1       | 9  |
| ENSMUSG0000039543  | Cfap70    | 13 | ENSMUSG00000032834 | Pwp2       | 20 |
| ENSMUSG00000094282 | Cfap73    | 14 | ENSMUSG00000044950 | Pwwp2a     | 7  |
| ENSMUSG00000078490 | Cfap74    | 1  | ENSMUSG00000020156 | Pwwp3a     | 20 |
| ENSMUSG00000079502 | Cfap77    | 14 | ENSMUSG00000042515 | Pwwp3b     | 20 |
| ENSMUSG00000031631 | Cfap97    | 9  | ENSMUSG00000021411 | Pxdc1      | 20 |
| ENSMUSG00000090336 | Cfap97d2  | 13 | ENSMUSG00000020674 | Pxdn       | 9  |
| ENSMUSG00000109572 | Cfap99    | 12 | ENSMUSG00000033885 | Pxk        | 9  |
| ENSMUSG00000031954 | Cfdp1     | 20 | ENSMUSG00000029499 | Pxmp2      | 2  |
| ENSMUSG00000026365 | Cfh       | 20 | ENSMUSG00000000876 | Pxmp4      | 20 |
| ENSMUSG00000056201 | Cfl1      | 19 | ENSMUSG00000029528 | Pxn        | 20 |
| ENSMUSG00000062929 | Cfl2      | 20 | ENSMUSG00000043587 | Pxylp1     | 20 |
| ENSMUSG00000026031 | Cflar     | 1  | ENSMUSG00000030793 | Pycard     | 20 |
| ENSMUSG00000001128 | Cfp       | 20 | ENSMUSG00000025140 | Pycr1      | 18 |
| ENSMUSG00000041301 | Cftr      | 20 | ENSMUSG00000026520 | Pycr2      | 12 |
| ENSMUSG00000032344 | Cgas      | 20 | ENSMUSG00000022571 | Pycr1      | 20 |
| ENSMUSG00000054604 | Cggbp1    | 3  | ENSMUSG00000033059 | Pygb       | 20 |
| ENSMUSG00000068876 | Cgn       | 17 | ENSMUSG00000021069 | Pygl       | 20 |
| ENSMUSG00000032232 | Cgn1      | 13 | ENSMUSG00000034910 | Pygo1      | 19 |
| ENSMUSG00000029161 | Cgref1    | 12 | ENSMUSG00000047824 | Pygo2      | 12 |
| ENSMUSG00000055128 | Cgrrf1    | 3  | ENSMUSG00000064030 | Pym1       | 20 |
| ENSMUSG00000027313 | Chac1     | 20 | ENSMUSG00000041671 | Pyroxd1    | 20 |
| ENSMUSG00000020309 | Chac2     | 20 | ENSMUSG00000060224 | Pyroxd2    | 1  |
| ENSMUSG00000063765 | Chad1     | 7  | ENSMUSG00000043162 | Pyurf      | 20 |
| ENSMUSG0000002835  | Chaf1a    | 20 | ENSMUSG00000032604 | Qars       | 20 |
| ENSMUSG00000047710 | Champ1    | 20 | ENSMUSG00000015806 | Qdpr       | 16 |
| ENSMUSG00000021919 | Chat      | 3  | ENSMUSG00000062078 | Qk         | 16 |
| ENSMUSG00000063787 | Chchd1    | 12 | ENSMUSG00000024084 | Qpct       | 20 |
| ENSMUSG00000049422 | Chchd10   | 19 | ENSMUSG00000030407 | Qpctl      | 20 |
| ENSMUSG00000070493 | Chchd2    | 12 | ENSMUSG00000030674 | Qprt       | 20 |
| ENSMUSG00000094320 | Chchd2-ps | 20 | ENSMUSG00000058400 | Qrfpr      | 20 |
| ENSMUSG00000053768 | Chchd3    | 10 | ENSMUSG00000029917 | Qrfprl     | 9  |
| ENSMUSG00000034203 | Chchd4    | 2  | ENSMUSG00000006673 | Qrich1     | 9  |
| ENSMUSG00000037938 | Chchd5    | 20 | ENSMUSG00000019863 | Qrs1       | 3  |
| ENSMUSG00000030086 | Chchd6    | 12 | ENSMUSG00000033684 | Qsox1      | 7  |
| ENSMUSG00000042198 | Chchd7    | 12 | ENSMUSG00000036327 | Qsox2      | 12 |
| ENSMUSG00000023852 | Chd1      | 20 | ENSMUSG00000002825 | Qtrt1      | 20 |
| ENSMUSG00000028089 | Chd1l     | 9  | ENSMUSG00000022704 | Qtrt2      | 20 |
| ENSMUSG00000078671 | Chd2      | 20 | ENSMUSG00000034194 | R3hcc1     | 20 |
| ENSMUSG00000018474 | Chd3      | 1  | ENSMUSG00000025184 | R3hcc1l    | 20 |
| ENSMUSG00000063870 | Chd4      | 9  | ENSMUSG00000056211 | R3hdm1     | 9  |
| ENSMUSG00000005045 | Chd5      | 9  | ENSMUSG00000025404 | R3hdm2     | 3  |
| ENSMUSG00000057133 | Chd6      | 2  | ENSMUSG00000035781 | R3hdm4     | 18 |
| ENSMUSG00000041235 | Chd7      | 18 | ENSMUSG00000059277 | R74862     | 20 |
| ENSMUSG00000053754 | Chd8      | 12 | ENSMUSG00000020671 | Rab10      | 3  |
| ENSMUSG00000056608 | Chd9      | 2  | ENSMUSG00000079179 | Rab10os    | 20 |
| ENSMUSG00000015970 | Chdh      | 1  | ENSMUSG00000004771 | Rab11a     | 3  |
| ENSMUSG00000032113 | Chek1     | 20 | ENSMUSG00000077450 | Rab11b     | 11 |
| ENSMUSG00000029521 | Chek2     | 20 | ENSMUSG00000095690 | Rab11b-ps2 | 20 |
| ENSMUSG00000052488 | Cherp     | 20 | ENSMUSG00000031488 | Rab11fip1  | 13 |
| ENSMUSG00000014668 | Chfr      | 20 | ENSMUSG00000040022 | Rab11fip2  | 4  |
| ENSMUSG00000021194 | Chga      | 18 | ENSMUSG00000037098 | Rab11fip3  | 20 |
| ENSMUSG00000027350 | Chgb      | 5  | ENSMUSG00000017639 | Rab11fip4  | 20 |
| ENSMUSG00000062778 | Chia1     | 9  | ENSMUSG00000051343 | Rab11fip5  | 18 |

|                    |          |    |                    |          |    |
|--------------------|----------|----|--------------------|----------|----|
| ENSMUSG00000031327 | Chic1    | 20 | ENSMUSG00000023460 | Rab12    | 20 |
| ENSMUSG00000029229 | Chic2    | 20 | ENSMUSG00000027935 | Rab13    | 20 |
| ENSMUSG00000025512 | Chid1    | 3  | ENSMUSG00000026878 | Rab14    | 2  |
| ENSMUSG00000064246 | Chil1    | 20 | ENSMUSG00000021062 | Rab15    | 9  |
| ENSMUSG00000026450 | Chit1    | 20 | ENSMUSG00000073639 | Rab18    | 1  |
| ENSMUSG00000024843 | Chka     | 20 | ENSMUSG00000020149 | Rab1a    | 9  |
| ENSMUSG00000022617 | Chkb     | 12 | ENSMUSG00000024870 | Rab1b    | 12 |
| ENSMUSG00000030077 | Chl1     | 1  | ENSMUSG00000031504 | Rab20    | 13 |
| ENSMUSG00000025531 | Chm      | 1  | ENSMUSG00000020132 | Rab21    | 1  |
| ENSMUSG00000078185 | Chml     | 18 | ENSMUSG00000027519 | Rab22a   | 20 |
| ENSMUSG00000000743 | Chmp1a   | 3  | ENSMUSG00000004768 | Rab23    | 3  |
| ENSMUSG00000109901 | Chmp1b   | 9  | ENSMUSG00000034789 | Rab24    | 20 |
| ENSMUSG00000033916 | Chmp2a   | 19 | ENSMUSG00000079657 | Rab26    | 18 |
| ENSMUSG00000004843 | Chmp2b   | 20 | ENSMUSG00000093565 | Rab26os  | 20 |
| ENSMUSG00000053119 | Chmp3    | 18 | ENSMUSG00000032202 | Rab27a   | 2  |
| ENSMUSG00000038467 | Chmp4b   | 12 | ENSMUSG00000024511 | Rab27b   | 16 |
| ENSMUSG00000028419 | Chmp5    | 12 | ENSMUSG00000029128 | Rab28    | 20 |
| ENSMUSG00000025371 | Chmp6    | 20 | ENSMUSG00000026433 | Rab29    | 18 |
| ENSMUSG00000034190 | Chmp7    | 11 | ENSMUSG00000047187 | Rab2a    | 20 |
| ENSMUSG00000056486 | Chn1     | 9  | ENSMUSG00000022159 | Rab2b    | 9  |
| ENSMUSG00000085838 | Chn1os1  | 9  | ENSMUSG00000030643 | Rab30    | 20 |
| ENSMUSG00000086544 | Chn1os3  | 9  | ENSMUSG00000056515 | Rab31    | 20 |
| ENSMUSG00000004633 | Chn2     | 20 | ENSMUSG00000019832 | Rab32    | 20 |
| ENSMUSG00000022860 | Chodl    | 20 | ENSMUSG00000031104 | Rab33a   | 20 |
| ENSMUSG00000001774 | Chordc1  | 20 | ENSMUSG00000027739 | Rab33b   | 12 |
| ENSMUSG00000014077 | Chp1     | 19 | ENSMUSG00000002059 | Rab34    | 18 |
| ENSMUSG00000030865 | Chp2     | 20 | ENSMUSG00000029518 | Rab35    | 20 |
| ENSMUSG00000032997 | Chpf     | 20 | ENSMUSG00000020175 | Rab36    | 20 |
| ENSMUSG00000038181 | Chpf2    | 1  | ENSMUSG00000020732 | Rab37    | 18 |
| ENSMUSG00000060002 | Chpt1    | 3  | ENSMUSG00000030559 | Rab38    | 20 |
| ENSMUSG00000068391 | Chrac1   | 12 | ENSMUSG00000055069 | Rab39    | 20 |
| ENSMUSG00000006958 | Chrd     | 5  | ENSMUSG00000031202 | Rab39b   | 1  |
| ENSMUSG00000031283 | Chrdl1   | 19 | ENSMUSG00000003411 | Rab3b    | 3  |
| ENSMUSG00000030732 | Chrdl2   | 20 | ENSMUSG00000021700 | Rab3c    | 18 |
| ENSMUSG00000032773 | Chrm1    | 18 | ENSMUSG00000019066 | Rab3d    | 15 |
| ENSMUSG00000045613 | Chrm2    | 18 | ENSMUSG00000036104 | Rab3gap1 | 12 |
| ENSMUSG00000046159 | Chrm3    | 5  | ENSMUSG00000039318 | Rab3gap2 | 20 |
| ENSMUSG00000040495 | Chrm4    | 9  | ENSMUSG00000024663 | Rab3il1  | 20 |
| ENSMUSG00000074939 | Chrm5    | 20 | ENSMUSG00000064181 | Rab3ip   | 20 |
| ENSMUSG00000086382 | Chrna1os | 20 | ENSMUSG00000025170 | Rab40b   | 3  |
| ENSMUSG00000022041 | Chrna2   | 18 | ENSMUSG00000025730 | Rab40c   | 20 |
| ENSMUSG00000032303 | Chrna3   | 9  | ENSMUSG00000089687 | Rab42    | 20 |
| ENSMUSG00000027577 | Chrna4   | 18 | ENSMUSG00000030055 | Rab43    | 20 |
| ENSMUSG00000035594 | Chrna5   | 2  | ENSMUSG00000064147 | Rab44    | 20 |
| ENSMUSG00000030525 | Chrna7   | 20 | ENSMUSG00000019478 | Rab4a    | 10 |
| ENSMUSG00000041189 | Chrb1    | 20 | ENSMUSG00000053291 | Rab4b    | 20 |
| ENSMUSG00000027950 | Chrb2    | 9  | ENSMUSG00000017831 | Rab5a    | 20 |
| ENSMUSG00000035200 | Chrb4    | 20 | ENSMUSG00000000711 | Rab5b    | 20 |
| ENSMUSG00000027221 | Chst1    | 9  | ENSMUSG00000019173 | Rab5c    | 2  |
| ENSMUSG00000026080 | Chst10   | 20 | ENSMUSG00000027637 | Rab5if   | 19 |
| ENSMUSG00000034612 | Chst11   | 9  | ENSMUSG00000030704 | Rab6a    | 19 |
| ENSMUSG00000036599 | Chst12   | 20 | ENSMUSG00000032549 | Rab6b    | 1  |
| ENSMUSG00000074916 | Chst14   | 20 | ENSMUSG00000079477 | Rab7     | 20 |
| ENSMUSG00000030930 | Chst15   | 9  | ENSMUSG00000111686 | Rab7-ps1 | 20 |
| ENSMUSG00000033350 | Chst2    | 9  | ENSMUSG00000052688 | Rab7b    | 20 |



|                    |          |    |                    |          |    |
|--------------------|----------|----|--------------------|----------|----|
| ENSMUSG0000057337  | Chst3    | 20 | ENSMUSG0000003037  | Rab8a    | 20 |
| ENSMUSG0000031952  | Chst5    | 20 | ENSMUSG00000036943 | Rab8b    | 20 |
| ENSMUSG0000037347  | Chst7    | 20 | ENSMUSG00000079316 | Rab9     | 20 |
| ENSMUSG0000060402  | Chst8    | 18 | ENSMUSG00000043463 | Rab9b    | 16 |
| ENSMUSG0000047161  | Chst9    | 5  | ENSMUSG00000003380 | Rabac1   | 12 |
| ENSMUSG0000032640  | Chsy1    | 19 | ENSMUSG00000020817 | Rabep1   | 20 |
| ENSMUSG0000058152  | Chsy3    | 9  | ENSMUSG00000030727 | Rabep2   | 6  |
| ENSMUSG0000019214  | Chtf18   | 20 | ENSMUSG00000070953 | Rabepk   | 20 |
| ENSMUSG0000046691  | Chtf8    | 9  | ENSMUSG00000035437 | Rabgap1  | 19 |
| ENSMUSG00000001017 | Chtop    | 9  | ENSMUSG00000026721 | Rabgap1l | 5  |
| ENSMUSG00000025199 | Chuk     | 1  | ENSMUSG00000025340 | Rabgef1  | 20 |
| ENSMUSG00000090258 | Churc1   | 20 | ENSMUSG00000040472 | Rabggta  | 20 |
| ENSMUSG00000003662 | Ciao1    | 20 | ENSMUSG00000038975 | Rabggtb  | 20 |
| ENSMUSG00000032381 | Ciao2a   | 20 | ENSMUSG00000042229 | Rabif    | 9  |
| ENSMUSG00000031879 | Ciao2b   | 19 | ENSMUSG00000022621 | Rabl2    | 20 |
| ENSMUSG00000002280 | Ciao3    | 3  | ENSMUSG00000022827 | Rabl3    | 20 |
| ENSMUSG00000031781 | Ciapin1  | 20 | ENSMUSG00000015087 | Rabl6    | 3  |
| ENSMUSG00000038550 | Ciart    | 1  | ENSMUSG00000001847 | Rac1     | 20 |
| ENSMUSG00000030538 | Cib1     | 19 | ENSMUSG00000033220 | Rac2     | 20 |
| ENSMUSG00000037493 | Cib2     | 6  | ENSMUSG00000018012 | Rac3     | 2  |
| ENSMUSG00000005442 | Cic      | 20 | ENSMUSG00000023015 | Racgap1  | 20 |
| ENSMUSG00000024526 | Cidea    | 20 | ENSMUSG00000020372 | Rack1    | 20 |
| ENSMUSG00000022219 | Cideb    | 20 | ENSMUSG00000022248 | Rad1     | 1  |
| ENSMUSG00000021276 | Cinp     | 18 | ENSMUSG00000021635 | Rad17    | 20 |
| ENSMUSG00000033031 | Cip2a    | 20 | ENSMUSG00000030254 | Rad18    | 20 |
| ENSMUSG00000034157 | Cipc     | 1  | ENSMUSG00000022314 | Rad21    | 20 |
| ENSMUSG00000041777 | Cir1     | 9  | ENSMUSG00000074704 | Rad21l   | 20 |
| ENSMUSG00000045193 | Cirbp    | 20 | ENSMUSG00000003813 | Rad23a   | 20 |
| ENSMUSG00000037710 | Cisd1    | 12 | ENSMUSG00000028426 | Rad23b   | 20 |
| ENSMUSG00000028165 | Cisd2    | 20 | ENSMUSG00000020380 | Rad50    | 20 |
| ENSMUSG00000078695 | Cisd3    | 20 | ENSMUSG00000027323 | Rad51    | 20 |
| ENSMUSG00000032578 | Cish     | 20 | ENSMUSG00000030346 | Rad51ap1 | 20 |
| ENSMUSG00000029516 | Cit      | 18 | ENSMUSG00000086022 | Rad51ap2 | 19 |
| ENSMUSG00000051159 | Cited1   | 18 | ENSMUSG00000059060 | Rad51b   | 20 |
| ENSMUSG00000039910 | Cited2   | 9  | ENSMUSG00000007646 | Rad51c   | 20 |
| ENSMUSG00000070803 | Cited4   | 9  | ENSMUSG00000018841 | Rad51d   | 20 |
| ENSMUSG00000039205 | Ciz1     | 20 | ENSMUSG00000030166 | Rad52    | 2  |
| ENSMUSG00000028813 | CK137956 | 20 | ENSMUSG00000078773 | Rad54b   | 20 |
| ENSMUSG00000037725 | Ckap2    | 20 | ENSMUSG00000028702 | Rad54l   | 20 |
| ENSMUSG00000048327 | Ckap2l   | 20 | ENSMUSG00000040661 | Rad54l2  | 20 |
| ENSMUSG00000046841 | Ckap4    | 19 | ENSMUSG00000038569 | Rad9b    | 20 |
| ENSMUSG00000040549 | Ckap5    | 12 | ENSMUSG00000029576 | Radil    | 9  |
| ENSMUSG00000001270 | Ckb      | 2  | ENSMUSG00000027509 | Rae1     | 20 |
| ENSMUSG00000054400 | Cklf     | 20 | ENSMUSG00000000441 | Raf1     | 20 |
| ENSMUSG00000000308 | Ckmt1    | 6  | ENSMUSG00000061311 | Rag1     | 1  |
| ENSMUSG00000028044 | Cks1b    | 20 | ENSMUSG00000062115 | Rai1     | 9  |
| ENSMUSG00000062248 | Cks2     | 18 | ENSMUSG00000022246 | Rai14    | 20 |
| ENSMUSG00000064302 | Clasp1   | 19 | ENSMUSG00000043518 | Rai2     | 20 |
| ENSMUSG00000033392 | Clasp2   | 18 | ENSMUSG00000008859 | Rala     | 20 |
| ENSMUSG00000061028 | Clasrp   | 7  | ENSMUSG00000004451 | Ralb     | 20 |
| ENSMUSG00000037594 | Clba1    | 20 | ENSMUSG00000024096 | Ralbp1   | 20 |
| ENSMUSG00000027884 | Clcc1    | 20 | ENSMUSG00000021027 | Ralgapa1 | 3  |
| ENSMUSG00000029862 | Clcn1    | 20 | ENSMUSG00000037110 | Ralgapa2 | 20 |
| ENSMUSG00000022843 | Clcn2    | 20 | ENSMUSG00000027652 | Ralgapb  | 12 |
| ENSMUSG00000004319 | Clcn3    | 3  | ENSMUSG00000026821 | Ralgds   | 16 |

|                    |          |    |                    |            |    |
|--------------------|----------|----|--------------------|------------|----|
| ENSMUSG0000000605  | Clcn4    | 9  | ENSMUSG00000038831 | Ralgps1    | 2  |
| ENSMUSG00000004317 | Clcn5    | 9  | ENSMUSG00000026594 | Ralgps2    | 9  |
| ENSMUSG00000029016 | Clcn6    | 9  | ENSMUSG00000027593 | Raly       | 20 |
| ENSMUSG00000036636 | Clcn7    | 20 | ENSMUSG00000039717 | Ralyl      | 9  |
| ENSMUSG00000022512 | Cldn1    | 13 | ENSMUSG00000038646 | Ramac      | 12 |
| ENSMUSG00000022132 | Cldn10   | 2  | ENSMUSG00000034353 | Ramp1      | 19 |
| ENSMUSG00000037625 | Cldn11   | 16 | ENSMUSG00000001240 | Ramp2      | 20 |
| ENSMUSG00000046798 | Cldn12   | 1  | ENSMUSG00000041046 | Ramp3      | 18 |
| ENSMUSG00000047109 | Cldn14   | 1  | ENSMUSG00000029430 | Ran        | 20 |
| ENSMUSG00000066058 | Cldn19   | 20 | ENSMUSG00000037415 | Ranbp10    | 20 |
| ENSMUSG00000047230 | Cldn2    | 13 | ENSMUSG00000040594 | Ranbp17    | 20 |
| ENSMUSG00000091530 | Cldn20   | 20 | ENSMUSG00000003226 | Ranbp2     | 7  |
| ENSMUSG00000079450 | Cldn34c1 | 20 | ENSMUSG00000002372 | Ranbp3     | 20 |
| ENSMUSG00000041378 | Cldn5    | 20 | ENSMUSG00000048424 | Ranbp3l    | 5  |
| ENSMUSG00000022744 | Cldnd1   | 20 | ENSMUSG00000074909 | Ranbp6     | 20 |
| ENSMUSG00000004473 | Clec11a  | 9  | ENSMUSG00000038546 | Ranbp9     | 20 |
| ENSMUSG00000053063 | Clec12a  | 1  | ENSMUSG00000022391 | Rangap1    | 9  |
| ENSMUSG00000045930 | Clec14a  | 20 | ENSMUSG00000032892 | Rangrf     | 20 |
| ENSMUSG00000068663 | Clec16a  | 5  | ENSMUSG00000068798 | Rap1a      | 20 |
| ENSMUSG00000033633 | Clec18a  | 20 | ENSMUSG00000052681 | Rap1b      | 1  |
| ENSMUSG00000033082 | Clec1a   | 19 | ENSMUSG00000041351 | Rap1gap    | 1  |
| ENSMUSG00000030157 | Clec2d   | 1  | ENSMUSG00000038807 | Rap1gap2   | 18 |
| ENSMUSG00000089728 | Clec2f   | 7  | ENSMUSG00000028149 | Rap1gds1   | 18 |
| ENSMUSG00000079598 | Clec2l   | 18 | ENSMUSG00000051615 | Rap2a      | 9  |
| ENSMUSG00000025784 | Clec3b   | 20 | ENSMUSG00000036894 | Rap2b      | 6  |
| ENSMUSG00000029915 | Clec5a   | 20 | ENSMUSG00000050029 | Rap2c      | 20 |
| ENSMUSG00000079293 | Clec7a   | 20 | ENSMUSG00000039844 | Rapgef1    | 20 |
| ENSMUSG00000002190 | Clgn     | 20 | ENSMUSG00000062232 | Rapgef2    | 9  |
| ENSMUSG00000020461 | Clhc1    | 20 | ENSMUSG00000022469 | Rapgef3    | 4  |
| ENSMUSG00000007041 | Clic1    | 20 | ENSMUSG00000087397 | Rapgef3os2 | 20 |
| ENSMUSG00000037242 | Clic4    | 15 | ENSMUSG00000049044 | Rapgef4    | 9  |
| ENSMUSG00000023959 | Clic5    | 20 | ENSMUSG00000085001 | Rapgef4os2 | 19 |
| ENSMUSG00000022949 | Clic6    | 13 | ENSMUSG00000041992 | Rapgef5    | 9  |
| ENSMUSG00000006169 | Clint1   | 20 | ENSMUSG00000037533 | Rapgef6    | 20 |
| ENSMUSG00000049550 | Clip1    | 19 | ENSMUSG00000038020 | Rapgef1    | 5  |
| ENSMUSG00000063146 | Clip2    | 9  | ENSMUSG00000026014 | Raph1      | 18 |
| ENSMUSG00000013921 | Clip3    | 9  | ENSMUSG00000037992 | Rara       | 20 |
| ENSMUSG00000024059 | Clip4    | 9  | ENSMUSG00000017491 | Rarb       | 9  |
| ENSMUSG00000026034 | Clk1     | 20 | ENSMUSG00000001288 | Rarg       | 20 |
| ENSMUSG00000068917 | Clk2     | 20 | ENSMUSG00000049404 | Rarres1    | 20 |
| ENSMUSG00000032316 | Clk3     | 20 | ENSMUSG00000009281 | Rarres2    | 14 |
| ENSMUSG00000020385 | Clk4     | 20 | ENSMUSG00000018848 | Rars       | 20 |
| ENSMUSG00000021097 | Clmn     | 18 | ENSMUSG00000028292 | Rars2      | 20 |
| ENSMUSG00000032024 | Clmp     | 13 | ENSMUSG00000021549 | Rasa1      | 20 |
| ENSMUSG00000030720 | Cln3     | 20 | ENSMUSG00000032413 | Rasa2      | 20 |
| ENSMUSG00000022125 | Cln5     | 20 | ENSMUSG00000031453 | Rasa3      | 15 |
| ENSMUSG00000032245 | Cln6     | 20 | ENSMUSG00000004952 | Rasa4      | 18 |
| ENSMUSG00000026317 | Cln8     | 20 | ENSMUSG00000029602 | Rasal1     | 20 |
| ENSMUSG00000025439 | Clns1a   | 20 | ENSMUSG00000070565 | Rasal2     | 20 |
| ENSMUSG00000029238 | Clock    | 2  | ENSMUSG00000052142 | Rasal3     | 20 |
| ENSMUSG00000027079 | Clp1     | 20 | ENSMUSG00000049892 | Rasd1      | 18 |
| ENSMUSG00000001829 | Clpb     | 20 | ENSMUSG00000034472 | Rasd2      | 9  |
| ENSMUSG00000002660 | Clpp     | 12 | ENSMUSG00000030134 | Rasgef1a   | 9  |
| ENSMUSG00000002981 | Clptm1   | 1  | ENSMUSG00000089809 | Rasgef1b   | 9  |
| ENSMUSG00000021610 | Clptm1l  | 9  | ENSMUSG00000020374 | Rasgef1c   | 3  |

|                    |         |    |                     |         |    |
|--------------------|---------|----|---------------------|---------|----|
| ENSMUSG00000015357 | Clpx    | 20 | ENSMUSG00000032356  | Rasgrf1 | 5  |
| ENSMUSG00000042489 | Clspn   | 9  | ENSMUSG00000021708  | Rasgrf2 | 6  |
| ENSMUSG00000039953 | Clstn1  | 1  | ENSMUSG00000027347  | Rasgrp1 | 7  |
| ENSMUSG00000032452 | Clstn2  | 5  | ENSMUSG00000071042  | Rasgrp3 | 16 |
| ENSMUSG00000008153 | Clstn3  | 18 | ENSMUSG00000030589  | Rasgrp4 | 20 |
| ENSMUSG00000028478 | Clta    | 12 | ENSMUSG00000044562  | Rasip1  | 13 |
| ENSMUSG00000047547 | Cltb    | 7  | ENSMUSG00000034209  | Rasl10a | 20 |
| ENSMUSG00000047126 | Cltc    | 12 | ENSMUSG00000020684  | Rasl10b | 9  |
| ENSMUSG00000022037 | Clu     | 3  | ENSMUSG00000029641  | Rasl11a | 18 |
| ENSMUSG00000014232 | Cluap1  | 20 | ENSMUSG00000049907  | Rasl11b | 1  |
| ENSMUSG00000020741 | Cluh    | 20 | ENSMUSG00000041696  | Rasl12  | 1  |
| ENSMUSG00000041216 | Clvs1   | 8  | ENSMUSG00000010067  | Rassf1  | 20 |
| ENSMUSG00000019785 | Clvs2   | 4  | ENSMUSG000000098132 | Rassf10 | 20 |
| ENSMUSG00000025545 | Clybl   | 20 | ENSMUSG00000027339  | Rassf2  | 16 |
| ENSMUSG00000030282 | Cmas    | 20 | ENSMUSG00000025795  | Rassf3  | 18 |
| ENSMUSG00000022235 | Cmb1    | 9  | ENSMUSG00000042129  | Rassf4  | 15 |
| ENSMUSG00000039163 | Cmc1    | 20 | ENSMUSG00000026430  | Rassf5  | 18 |
| ENSMUSG00000014633 | Cmc2    | 20 | ENSMUSG00000029370  | Rassf6  | 6  |
| ENSMUSG00000090110 | Cmc4    | 20 | ENSMUSG00000038618  | Rassf7  | 12 |
| ENSMUSG00000034390 | Cmip    | 9  | ENSMUSG00000030259  | Rassf8  | 9  |
| ENSMUSG00000042190 | Cmklr1  | 20 | ENSMUSG00000044921  | Rassf9  | 13 |
| ENSMUSG00000028719 | Cmpk1   | 19 | ENSMUSG00000035275  | Raver2  | 20 |
| ENSMUSG00000020638 | Cmpk2   | 20 | ENSMUSG00000022105  | Rb1     | 20 |
| ENSMUSG00000022748 | Cmss1   | 20 | ENSMUSG00000025907  | Rb1cc1  | 3  |
| ENSMUSG00000031875 | Cmtm3   | 20 | ENSMUSG00000061898  | Rbak    | 20 |
| ENSMUSG00000096188 | Cmtm4   | 12 | ENSMUSG00000057236  | Rbbp4   | 20 |
| ENSMUSG00000040759 | Cmtm5   | 16 | ENSMUSG00000026439  | Rbbp5   | 20 |
| ENSMUSG00000032434 | Cmtm6   | 20 | ENSMUSG00000030779  | Rbbp6   | 20 |
| ENSMUSG00000032436 | Cmtm7   | 20 | ENSMUSG00000031353  | Rbbp7   | 9  |
| ENSMUSG00000041012 | Cmtm8   | 20 | ENSMUSG00000041238  | Rbbp8   | 1  |
| ENSMUSG00000024019 | Cmtr1   | 20 | ENSMUSG00000027428  | Rbbp9   | 20 |
| ENSMUSG00000046441 | Cmtr2   | 5  | ENSMUSG00000027466  | Rbck1   | 9  |
| ENSMUSG00000047419 | Cmya5   | 9  | ENSMUSG00000024570  | Rbfa    | 12 |
| ENSMUSG00000038085 | Cnbd2   | 12 | ENSMUSG00000118061  | Rbfaos  | 9  |
| ENSMUSG00000030057 | Cnbp    | 9  | ENSMUSG00000008658  | Rbfox1  | 9  |
| ENSMUSG00000056162 | Cndp1   | 13 | ENSMUSG00000033565  | Rbfox2  | 12 |
| ENSMUSG00000024644 | Cndp2   | 16 | ENSMUSG00000025576  | Rbfox3  | 18 |
| ENSMUSG00000036810 | Cnep1r1 | 20 | ENSMUSG00000078784  | Rbis    | 12 |
| ENSMUSG00000030897 | Cnga4   | 20 | ENSMUSG00000029136  | Rbks    | 20 |
| ENSMUSG00000015759 | Cnih1   | 20 | ENSMUSG00000027641  | Rbl1    | 20 |
| ENSMUSG00000024873 | Cnih2   | 20 | ENSMUSG00000031666  | Rbl2    | 20 |
| ENSMUSG00000026514 | Cnih3   | 19 | ENSMUSG00000031060  | Rbm10   | 20 |
| ENSMUSG00000062169 | Cnih4   | 20 | ENSMUSG00000032940  | Rbm11   | 1  |
| ENSMUSG00000025658 | Cnksr2  | 9  | ENSMUSG00000089824  | Rbm12   | 20 |
| ENSMUSG00000015202 | Cnksr3  | 18 | ENSMUSG00000046667  | Rbm12b1 | 20 |
| ENSMUSG00000022025 | Cnmd    | 20 | ENSMUSG00000052137  | Rbm12b2 | 20 |
| ENSMUSG0000001349  | Cnn1    | 20 | ENSMUSG00000006456  | Rbm14   | 20 |
| ENSMUSG0000004665  | Cnn2    | 20 | ENSMUSG00000048109  | Rbm15   | 2  |
| ENSMUSG00000053931 | Cnn3    | 20 | ENSMUSG00000074102  | Rbm15b  | 12 |
| ENSMUSG00000025189 | Cnnm1   | 20 | ENSMUSG00000037197  | Rbm17   | 20 |
| ENSMUSG00000064105 | Cnnm2   | 20 | ENSMUSG00000026889  | Rbm18   | 20 |
| ENSMUSG0000001138  | Cnnm3   | 20 | ENSMUSG00000029594  | Rbm19   | 20 |
| ENSMUSG00000037408 | Cnnm4   | 20 | ENSMUSG00000043639  | Rbm20   | 20 |
| ENSMUSG00000036550 | Cnot1   | 12 | ENSMUSG00000024604  | Rbm22   | 20 |
| ENSMUSG00000056167 | Cnot10  | 20 | ENSMUSG00000038132  | Rbm24   | 18 |

|                    |          |    |                     |          |    |
|--------------------|----------|----|---------------------|----------|----|
| ENSMUSG0000003135  | Cnot11   | 20 | ENSMUSG00000010608  | Rbm25    | 2  |
| ENSMUSG00000020166 | Cnot2    | 4  | ENSMUSG00000022119  | Rbm26    | 12 |
| ENSMUSG00000035632 | Cnot3    | 20 | ENSMUSG00000024491  | Rbm27    | 2  |
| ENSMUSG00000038784 | Cnot4    | 7  | ENSMUSG00000029701  | Rbm28    | 18 |
| ENSMUSG00000020362 | Cnot6    | 6  | ENSMUSG00000031167  | Rbm3     | 1  |
| ENSMUSG00000034724 | Cnot6l   | 3  | ENSMUSG00000099875  | Rbm3-ps  | 20 |
| ENSMUSG00000031601 | Cnot7    | 9  | ENSMUSG00000048271  | Rbm33    | 9  |
| ENSMUSG00000020515 | Cnot8    | 20 | ENSMUSG00000033931  | Rbm34    | 20 |
| ENSMUSG00000026174 | Cnot9    | 20 | ENSMUSG00000027510  | Rbm38    | 20 |
| ENSMUSG00000006782 | Cnp      | 16 | ENSMUSG00000027620  | Rbm39    | 18 |
| ENSMUSG00000033159 | Cnppd1   | 20 | ENSMUSG00000055188  | Rbm3os   | 20 |
| ENSMUSG00000025381 | Cnpy2    | 12 | ENSMUSG00000094936  | Rbm4     | 20 |
| ENSMUSG00000023973 | Cnpy3    | 3  | ENSMUSG00000031433  | Rbm41    | 20 |
| ENSMUSG00000036968 | Cnpy4    | 20 | ENSMUSG00000036733  | Rbm42    | 20 |
| ENSMUSG00000044288 | Cnr1     | 9  | ENSMUSG00000036249  | Rbm43    | 20 |
| ENSMUSG00000044629 | Cnr1p1   | 1  | ENSMUSG00000042369  | Rbm45    | 20 |
| ENSMUSG00000038949 | Cnst     | 9  | ENSMUSG00000033882  | Rbm46    | 20 |
| ENSMUSG00000078653 | Cntd1    | 20 | ENSMUSG00000070780  | Rbm47    | 13 |
| ENSMUSG00000028444 | Cntfr    | 18 | ENSMUSG00000040302  | Rbm48    | 20 |
| ENSMUSG00000038070 | Cntln    | 9  | ENSMUSG00000033760  | Rbm4b    | 3  |
| ENSMUSG00000055022 | Cntn1    | 3  | ENSMUSG00000032580  | Rbm5     | 20 |
| ENSMUSG00000053024 | Cntn2    | 15 | ENSMUSG00000032582  | Rbm6     | 16 |
| ENSMUSG00000030075 | Cntn3    | 12 | ENSMUSG000000101589 | Rbm6-ps1 | 20 |
| ENSMUSG00000064293 | Cntn4    | 20 | ENSMUSG00000042396  | Rbm7     | 20 |
| ENSMUSG00000039488 | Cntn5    | 9  | ENSMUSG00000038374  | Rbm8a    | 20 |
| ENSMUSG00000030092 | Cntn6    | 9  | ENSMUSG00000078184  | Rbm8a2   | 20 |
| ENSMUSG00000017167 | Cntnap1  | 1  | ENSMUSG00000026970  | Rbms1    | 20 |
| ENSMUSG00000039419 | Cntnap2  | 20 | ENSMUSG00000040043  | Rbms2    | 20 |
| ENSMUSG00000033063 | Cntnap3  | 1  | ENSMUSG00000039607  | Rbms3    | 18 |
| ENSMUSG00000031772 | Cntnap4  | 9  | ENSMUSG00000031134  | Rbmx     | 3  |
| ENSMUSG00000070695 | Cntnap5a | 1  | ENSMUSG00000031107  | Rbmx2    | 20 |
| ENSMUSG00000067028 | Cntnap5b | 20 | ENSMUSG00000037070  | Rbmxl1   | 20 |
| ENSMUSG00000038048 | Cntnap5c | 20 | ENSMUSG00000046402  | Rbp1     | 13 |
| ENSMUSG00000057110 | Cntrl    | 9  | ENSMUSG00000024990  | Rbp4     | 19 |
| ENSMUSG00000032782 | Cntrob   | 20 | ENSMUSG00000039191  | Rbpj     | 20 |
| ENSMUSG00000017188 | Coa3     | 12 | ENSMUSG00000079575  | Rbpj-ps3 | 20 |
| ENSMUSG00000044881 | Coa4     | 20 | ENSMUSG00000017007  | Rbpjl    | 13 |
| ENSMUSG00000026112 | Coa5     | 20 | ENSMUSG00000031586  | Rbpms    | 18 |
| ENSMUSG00000051671 | Coa6     | 20 | ENSMUSG00000032387  | Rbpms2   | 20 |
| ENSMUSG00000048351 | Coa7     | 2  | ENSMUSG00000014550  | Rbsn     | 13 |
| ENSMUSG00000001755 | Coasy    | 2  | ENSMUSG00000022400  | Rbx1     | 20 |
| ENSMUSG00000020173 | Cobl     | 7  | ENSMUSG00000049832  | Rbx1-ps  | 20 |
| ENSMUSG00000034903 | Cobl1    | 16 | ENSMUSG00000040423  | Rc3h1    | 3  |
| ENSMUSG00000020953 | Coch     | 9  | ENSMUSG00000075376  | Rc3h2    | 2  |
| ENSMUSG00000018661 | Cog1     | 20 | ENSMUSG00000022951  | Rcan1    | 9  |
| ENSMUSG00000031979 | Cog2     | 20 | ENSMUSG00000039601  | Rcan2    | 18 |
| ENSMUSG00000034893 | Cog3     | 20 | ENSMUSG00000059713  | Rcan3    | 1  |
| ENSMUSG00000031753 | Cog4     | 3  | ENSMUSG00000035469  | Rcbtb1   | 16 |
| ENSMUSG00000035933 | Cog5     | 2  | ENSMUSG00000022106  | Rcbtb2   | 20 |
| ENSMUSG00000027742 | Cog6     | 16 | ENSMUSG00000028896  | Rcc1     | 20 |
| ENSMUSG00000034951 | Cog7     | 18 | ENSMUSG00000061979  | Rcc1l    | 20 |
| ENSMUSG00000031916 | Cog8     | 20 | ENSMUSG00000040945  | Rcc2     | 20 |
| ENSMUSG00000033983 | Coil     | 20 | ENSMUSG00000038930  | Rccd1    | 20 |
| ENSMUSG00000027966 | Col11a1  | 9  | ENSMUSG00000024889  | Rce1     | 20 |
| ENSMUSG00000024330 | Col11a2  | 2  | ENSMUSG00000029397  | Rchy1    | 20 |

|                    |          |    |                    |         |    |
|--------------------|----------|----|--------------------|---------|----|
| ENSMUSG00000032332 | Col12a1  | 19 | ENSMUSG00000024785 | Rcl1    | 3  |
| ENSMUSG00000058806 | Col13a1  | 1  | ENSMUSG00000005973 | Rcn1    | 1  |
| ENSMUSG00000022371 | Col14a1  | 9  | ENSMUSG00000032320 | Rcn2    | 20 |
| ENSMUSG00000028339 | Col15a1  | 9  | ENSMUSG00000019539 | Rcn3    | 1  |
| ENSMUSG00000040690 | Col16a1  | 9  | ENSMUSG00000037896 | Rcor1   | 20 |
| ENSMUSG00000025064 | Col17a1  | 19 | ENSMUSG00000024968 | Rcor2   | 20 |
| ENSMUSG00000001435 | Col18a1  | 13 | ENSMUSG00000037395 | Rcor3   | 20 |
| ENSMUSG00000026141 | Col19a1  | 1  | ENSMUSG00000040723 | Rcsd1   | 20 |
| ENSMUSG00000001506 | Col1a1   | 20 | ENSMUSG00000020907 | Rcvrn   | 20 |
| ENSMUSG00000029661 | Col1a2   | 9  | ENSMUSG00000089789 | Rdh1    | 20 |
| ENSMUSG00000016356 | Col20a1  | 1  | ENSMUSG00000025921 | Rdh10   | 20 |
| ENSMUSG00000079022 | Col22a1  | 20 | ENSMUSG00000066441 | Rdh11   | 9  |
| ENSMUSG00000063564 | Col23a1  | 12 | ENSMUSG00000021123 | Rdh12   | 1  |
| ENSMUSG00000028197 | Col24a1  | 16 | ENSMUSG00000008435 | Rdh13   | 20 |
| ENSMUSG00000058897 | Col25a1  | 9  | ENSMUSG00000020621 | Rdh14   | 20 |
| ENSMUSG00000004415 | Col26a1  | 18 | ENSMUSG00000025350 | Rdh5    | 13 |
| ENSMUSG00000045672 | Col27a1  | 20 | ENSMUSG00000010362 | Rdm1    | 19 |
| ENSMUSG00000068794 | Col28a1  | 20 | ENSMUSG00000032050 | Rdx     | 9  |
| ENSMUSG00000022483 | Col2a1   | 20 | ENSMUSG00000074269 | Rec114  | 20 |
| ENSMUSG00000026043 | Col3a1   | 20 | ENSMUSG00000002324 | Rec8    | 20 |
| ENSMUSG00000031502 | Col4a1   | 19 | ENSMUSG00000028476 | Reck    | 20 |
| ENSMUSG00000031503 | Col4a2   | 19 | ENSMUSG00000030243 | Recql   | 20 |
| ENSMUSG00000079465 | Col4a3   | 13 | ENSMUSG00000033762 | Recql4  | 20 |
| ENSMUSG00000021669 | Col4a3bp | 3  | ENSMUSG00000020752 | Recql5  | 20 |
| ENSMUSG00000067158 | Col4a4   | 13 | ENSMUSG00000052852 | Reep1   | 18 |
| ENSMUSG00000031274 | Col4a5   | 13 | ENSMUSG00000038555 | Reep2   | 18 |
| ENSMUSG00000026837 | Col5a1   | 20 | ENSMUSG00000019873 | Reep3   | 10 |
| ENSMUSG00000026042 | Col5a2   | 20 | ENSMUSG00000033589 | Reep4   | 20 |
| ENSMUSG00000004098 | Col5a3   | 20 | ENSMUSG00000005873 | Reep5   | 9  |
| ENSMUSG00000001119 | Col6a1   | 3  | ENSMUSG00000035504 | Reep6   | 20 |
| ENSMUSG00000020241 | Col6a2   | 18 | ENSMUSG00000020275 | Rel     | 20 |
| ENSMUSG00000048126 | Col6a3   | 20 | ENSMUSG00000024927 | Rela    | 9  |
| ENSMUSG00000032572 | Col6a4   | 1  | ENSMUSG00000002983 | Relb    | 20 |
| ENSMUSG00000091345 | Col6a5   | 1  | ENSMUSG00000026319 | Relch   | 20 |
| ENSMUSG00000043719 | Col6a6   | 20 | ENSMUSG00000047881 | Rel11   | 18 |
| ENSMUSG00000025650 | Col7a1   | 20 | ENSMUSG00000044024 | Rel12   | 9  |
| ENSMUSG00000068196 | Col8a1   | 13 | ENSMUSG00000042453 | Reln    | 6  |
| ENSMUSG00000056174 | Col8a2   | 13 | ENSMUSG00000008318 | Relt    | 18 |
| ENSMUSG00000026147 | Col9a1   | 20 | ENSMUSG00000000359 | Rem1    | 20 |
| ENSMUSG00000028626 | Col9a2   | 9  | ENSMUSG00000022176 | Rem2    | 9  |
| ENSMUSG00000027570 | Col9a3   | 13 | ENSMUSG00000031387 | Renbp   | 7  |
| ENSMUSG00000079559 | Colca2   | 20 | ENSMUSG00000040121 | Rep15   | 18 |
| ENSMUSG00000036103 | Colec12  | 9  | ENSMUSG00000052751 | Repin1  | 1  |
| ENSMUSG00000034807 | Colgalt1 | 3  | ENSMUSG00000019854 | Reps1   | 9  |
| ENSMUSG00000032649 | Colgalt2 | 20 | ENSMUSG00000040855 | Reps2   | 19 |
| ENSMUSG00000057606 | Colq     | 20 | ENSMUSG00000029048 | Rer1    | 1  |
| ENSMUSG00000051355 | Comm1    | 20 | ENSMUSG00000039852 | Rere    | 9  |
| ENSMUSG00000042705 | Comm10   | 20 | ENSMUSG00000030222 | Rerg    | 19 |
| ENSMUSG00000036513 | Comm2    | 20 | ENSMUSG00000032712 | Resf1   | 2  |
| ENSMUSG00000051154 | Comm3    | 20 | ENSMUSG00000033061 | Resp18  | 17 |
| ENSMUSG00000032299 | Comm4    | 12 | ENSMUSG00000029249 | Rest    | 20 |
| ENSMUSG00000055041 | Comm5    | 20 | ENSMUSG00000030110 | Ret     | 18 |
| ENSMUSG00000075486 | Comm6    | 20 | ENSMUSG00000012705 | Retn    | 20 |
| ENSMUSG00000056941 | Comm7    | 1  | ENSMUSG00000022270 | Retreg1 | 18 |
| ENSMUSG00000029213 | Comm8    | 1  | ENSMUSG00000049339 | Retreg2 | 20 |

|                    |        |    |                    |         |    |
|--------------------|--------|----|--------------------|---------|----|
| ENSMUSG0000027163  | Commd9 | 20 | ENSMUSG00000017802 | Retreg3 | 20 |
| ENSMUSG0000021773  | Comtd1 | 20 | ENSMUSG00000056666 | Retsat  | 20 |
| ENSMUSG0000040782  | Cop1   | 2  | ENSMUSG00000026082 | Rev1    | 9  |
| ENSMUSG0000026553  | Copa   | 1  | ENSMUSG00000019841 | Rev3l   | 3  |
| ENSMUSG0000030754  | Copb1  | 20 | ENSMUSG00000058833 | Rex1bd  | 12 |
| ENSMUSG0000032458  | Copb2  | 1  | ENSMUSG00000047417 | Rexo1   | 9  |
| ENSMUSG00000055681 | Cope   | 7  | ENSMUSG00000032026 | Rexo2   | 12 |
| ENSMUSG0000030058  | Copg1  | 20 | ENSMUSG00000052406 | Rexo4   | 20 |
| ENSMUSG0000025607  | Copg2  | 20 | ENSMUSG00000030924 | Rexo5   | 9  |
| ENSMUSG00000031458 | Coprs  | 9  | ENSMUSG00000029191 | Rfc1    | 20 |
| ENSMUSG0000027206  | Cops2  | 20 | ENSMUSG00000023104 | Rfc2    | 19 |
| ENSMUSG00000019373 | Cops3  | 20 | ENSMUSG00000033970 | Rfc3    | 20 |
| ENSMUSG00000035297 | Cops4  | 20 | ENSMUSG00000022881 | Rfc4    | 20 |
| ENSMUSG0000025917  | Cops5  | 20 | ENSMUSG00000029363 | Rfc5    | 9  |
| ENSMUSG00000019494 | Cops6  | 12 | ENSMUSG00000043190 | Rfesd   | 20 |
| ENSMUSG00000030127 | Cops7a | 12 | ENSMUSG00000020696 | Rffl    | 15 |
| ENSMUSG00000026240 | Cops7b | 20 | ENSMUSG00000024712 | Rfk     | 12 |
| ENSMUSG00000034432 | Cops8  | 20 | ENSMUSG00000020846 | Rflnb   | 18 |
| ENSMUSG00000073616 | Cops9  | 12 | ENSMUSG00000025158 | Rfng    | 20 |
| ENSMUSG00000060992 | Copz1  | 2  | ENSMUSG00000052395 | Rft1    | 20 |
| ENSMUSG00000018672 | Copz2  | 13 | ENSMUSG00000039316 | Rftn1   | 20 |
| ENSMUSG00000039914 | Coq10a | 20 | ENSMUSG00000025978 | Rftn2   | 20 |
| ENSMUSG00000025981 | Coq10b | 20 | ENSMUSG00000033596 | Rfwd3   | 20 |
| ENSMUSG00000029319 | Coq2   | 20 | ENSMUSG00000031706 | Rfx1    | 9  |
| ENSMUSG00000028247 | Coq3   | 20 | ENSMUSG00000024206 | Rfx2    | 1  |
| ENSMUSG00000026798 | Coq4   | 20 | ENSMUSG00000040929 | Rfx3    | 18 |
| ENSMUSG00000041733 | Coq5   | 20 | ENSMUSG00000020037 | Rfx4    | 1  |
| ENSMUSG00000021235 | Coq6   | 20 | ENSMUSG00000005774 | Rfx5    | 20 |
| ENSMUSG00000030652 | Coq7   | 20 | ENSMUSG00000037674 | Rfx7    | 2  |
| ENSMUSG00000026489 | Coq8a  | 20 | ENSMUSG00000036120 | Rfxank  | 20 |
| ENSMUSG00000003762 | Coq8b  | 20 | ENSMUSG00000036615 | Rfxap   | 20 |
| ENSMUSG00000031782 | Coq9   | 2  | ENSMUSG00000022018 | Rgcc    | 20 |
| ENSMUSG00000030707 | Coro1a | 20 | ENSMUSG00000026482 | Rgl1    | 18 |
| ENSMUSG00000024835 | Coro1b | 20 | ENSMUSG00000041354 | Rgl2    | 20 |
| ENSMUSG00000004530 | Coro1c | 9  | ENSMUSG00000040146 | Rgl3    | 18 |
| ENSMUSG00000028337 | Coro2a | 17 | ENSMUSG00000070509 | Rgma    | 18 |
| ENSMUSG00000041729 | Coro2b | 20 | ENSMUSG00000048027 | Rgmb    | 1  |
| ENSMUSG00000020836 | Coro6  | 18 | ENSMUSG00000028468 | Rgp1    | 9  |
| ENSMUSG00000039637 | Coro7  | 20 | ENSMUSG00000026358 | Rgs1    | 20 |
| ENSMUSG00000031827 | Cotl1  | 20 | ENSMUSG00000030844 | Rgs10   | 3  |
| ENSMUSG00000042148 | Cox10  | 20 | ENSMUSG00000024186 | Rgs11   | 1  |
| ENSMUSG00000020544 | Cox11  | 20 | ENSMUSG00000029101 | Rgs12   | 9  |
| ENSMUSG00000023020 | Cox14  | 12 | ENSMUSG00000052087 | Rgs14   | 3  |
| ENSMUSG00000040018 | Cox15  | 20 | ENSMUSG00000026475 | Rgs16   | 18 |
| ENSMUSG00000091803 | Cox16  | 20 | ENSMUSG00000019775 | Rgs17   | 17 |
| ENSMUSG00000046516 | Cox17  | 12 | ENSMUSG00000002458 | Rgs19   | 20 |
| ENSMUSG00000035505 | Cox18  | 12 | ENSMUSG00000026360 | Rgs2    | 19 |
| ENSMUSG00000045438 | Cox19  | 20 | ENSMUSG00000002459 | Rgs20   | 9  |
| ENSMUSG00000031818 | Cox4i1 | 12 | ENSMUSG00000037627 | Rgs22   | 20 |
| ENSMUSG00000009876 | Cox4i2 | 12 | ENSMUSG00000059810 | Rgs3    | 18 |
| ENSMUSG00000000088 | Cox5a  | 12 | ENSMUSG00000038530 | Rgs4    | 9  |
| ENSMUSG00000061518 | Cox5b  | 12 | ENSMUSG00000026678 | Rgs5    | 20 |
| ENSMUSG00000041697 | Cox6a1 | 12 | ENSMUSG00000021219 | Rgs6    | 18 |
| ENSMUSG00000030785 | Cox6a2 | 5  | ENSMUSG00000026527 | Rgs7    | 19 |
| ENSMUSG00000036751 | Cox6b1 | 5  | ENSMUSG00000021719 | Rgs7bp  | 8  |

|                    |          |    |                     |         |    |
|--------------------|----------|----|---------------------|---------|----|
| ENSMUSG00000051811 | Cox6b2   | 20 | ENSMUSG00000042671  | Rgs8    | 3  |
| ENSMUSG00000014313 | Cox6c    | 12 | ENSMUSG00000020599  | Rgs9    | 9  |
| ENSMUSG00000066491 | Cox6c2   | 12 | ENSMUSG00000042641  | Rgs1    | 18 |
| ENSMUSG00000074218 | Cox7a1   | 20 | ENSMUSG00000026142  | Rhbdd1  | 20 |
| ENSMUSG00000032330 | Cox7a2   | 12 | ENSMUSG00000039917  | Rhbdd2  | 20 |
| ENSMUSG00000024248 | Cox7a2l  | 20 | ENSMUSG00000034175  | Rhbdd3  | 12 |
| ENSMUSG00000031231 | Cox7b    | 12 | ENSMUSG00000020282  | Rhbdf1  | 20 |
| ENSMUSG00000017778 | Cox7c    | 12 | ENSMUSG00000020806  | Rhbdf2  | 20 |
| ENSMUSG00000035885 | Cox8a    | 12 | ENSMUSG00000025735  | Rhbd1   | 20 |
| ENSMUSG00000025488 | Cox8b    | 13 | ENSMUSG00000043333  | Rhbd2   | 20 |
| ENSMUSG00000003617 | Cp       | 20 | ENSMUSG00000017692  | Rhbd3   | 19 |
| ENSMUSG00000071553 | Cpa2     | 20 | ENSMUSG00000030549  | Rhcg    | 12 |
| ENSMUSG00000042501 | Cpa6     | 1  | ENSMUSG00000028945  | Rheb    | 20 |
| ENSMUSG00000020841 | Cpd      | 20 | ENSMUSG00000023755  | Rhebl1  | 17 |
| ENSMUSG00000037852 | Cpe      | 1  | ENSMUSG00000048668  | Rhno1   | 20 |
| ENSMUSG00000025586 | Cpeb1    | 9  | ENSMUSG00000007815  | Rhoa    | 5  |
| ENSMUSG00000109401 | Cpeb1os1 | 20 | ENSMUSG00000054364  | Rhob    | 20 |
| ENSMUSG00000039782 | Cpeb2    | 20 | ENSMUSG00000019944  | Rhobtb1 | 20 |
| ENSMUSG00000039652 | Cpeb3    | 3  | ENSMUSG00000022075  | Rhobtb2 | 9  |
| ENSMUSG00000020300 | Cpeb4    | 20 | ENSMUSG00000021589  | Rhobtb3 | 3  |
| ENSMUSG00000062980 | Cped1    | 20 | ENSMUSG00000002233  | Rhoc    | 20 |
| ENSMUSG00000039801 | Cplane1  | 20 | ENSMUSG00000041845  | Rhod    | 13 |
| ENSMUSG00000073733 | Cplane2  | 20 | ENSMUSG00000029449  | Rhof    | 20 |
| ENSMUSG00000033615 | Cplx1    | 18 | ENSMUSG00000073982  | Rhog    | 16 |
| ENSMUSG00000025867 | Cplx2    | 9  | ENSMUSG00000029204  | Rhoh    | 20 |
| ENSMUSG00000039714 | Cplx3    | 16 | ENSMUSG00000046768  | Rhoj    | 20 |
| ENSMUSG00000020183 | Cpm      | 20 | ENSMUSG00000024143  | Rhoq    | 16 |
| ENSMUSG00000025196 | Cpn1     | 20 | ENSMUSG00000017686  | Rhot1   | 20 |
| ENSMUSG00000074643 | Cpne1    | 20 | ENSMUSG00000025733  | Rhot2   | 1  |
| ENSMUSG00000034361 | Cpne2    | 13 | ENSMUSG00000039960  | Rhou    | 20 |
| ENSMUSG00000028228 | Cpne3    | 20 | ENSMUSG00000034226  | Rhov    | 20 |
| ENSMUSG00000032564 | Cpne4    | 19 | ENSMUSG00000022580  | Rhpn1   | 20 |
| ENSMUSG00000024008 | Cpne5    | 19 | ENSMUSG00000030494  | Rhpn2   | 9  |
| ENSMUSG00000022212 | Cpne6    | 5  | ENSMUSG000000097451 | Rian    | 20 |
| ENSMUSG00000034796 | Cpne7    | 6  | ENSMUSG00000025257  | Ribc1   | 20 |
| ENSMUSG00000052560 | Cpne8    | 20 | ENSMUSG00000022431  | Ribc2   | 20 |
| ENSMUSG00000030270 | Cpne9    | 18 | ENSMUSG00000038658  | Ric1    | 2  |
| ENSMUSG00000022742 | Cpox     | 1  | ENSMUSG00000048330  | Ric3    | 9  |
| ENSMUSG00000065979 | Cpped1   | 20 | ENSMUSG00000025485  | Ric8a   | 20 |
| ENSMUSG00000039007 | Cpq      | 13 | ENSMUSG00000035620  | Ric8b   | 9  |
| ENSMUSG00000034022 | Cpsf1    | 8  | ENSMUSG00000050310  | Rictor  | 2  |
| ENSMUSG00000041781 | Cpsf2    | 20 | ENSMUSG00000022323  | Rida    | 20 |
| ENSMUSG00000054309 | Cpsf3    | 1  | ENSMUSG00000036202  | Rif1    | 9  |
| ENSMUSG00000029625 | Cpsf4    | 3  | ENSMUSG00000028139  | Riad1   | 20 |
| ENSMUSG00000055531 | Cpsf6    | 2  | ENSMUSG00000038195  | Rilp    | 13 |
| ENSMUSG00000034820 | Cpsf7    | 20 | ENSMUSG00000029392  | Rilpl1  | 20 |
| ENSMUSG00000024900 | Cpt1a    | 20 | ENSMUSG00000029401  | Rilpl2  | 20 |
| ENSMUSG0000007783  | Cpt1c    | 20 | ENSMUSG00000029420  | Rimbp2  | 1  |
| ENSMUSG00000028607 | Cpt2     | 18 | ENSMUSG00000071636  | Rimbp3  | 9  |
| ENSMUSG00000029073 | Cptp     | 20 | ENSMUSG00000048899  | Rimkla  | 18 |
| ENSMUSG00000027408 | Cpxm1    | 20 | ENSMUSG00000040649  | Rimklb  | 20 |
| ENSMUSG00000030862 | Cpxm2    | 20 | ENSMUSG00000041670  | Rims1   | 20 |
| ENSMUSG00000016481 | Cr1l     | 20 | ENSMUSG00000037386  | Rims2   | 18 |
| ENSMUSG00000026616 | Cr2      | 20 | ENSMUSG00000032890  | Rims3   | 18 |
| ENSMUSG00000032291 | Crabp1   | 9  | ENSMUSG00000035226  | Rims4   | 20 |

|                    |          |    |                    |          |    |
|--------------------|----------|----|--------------------|----------|----|
| ENSMUSG0000004885  | Crabp2   | 9  | ENSMUSG00000024883 | Rin1     | 9  |
| ENSMUSG00000061414 | Cracr2a  | 9  | ENSMUSG00000001768 | Rin2     | 20 |
| ENSMUSG00000048200 | Cracr2b  | 20 | ENSMUSG00000044456 | Rin3     | 20 |
| ENSMUSG00000045867 | Cradd    | 1  | ENSMUSG00000024325 | Ring1    | 11 |
| ENSMUSG00000038002 | Cramp1l  | 20 | ENSMUSG00000051735 | Rinl     | 20 |
| ENSMUSG00000026853 | Crat     | 20 | ENSMUSG00000028999 | Rint1    | 20 |
| ENSMUSG00000063681 | Crb1     | 20 | ENSMUSG00000021428 | Riok1    | 20 |
| ENSMUSG00000035403 | Crb2     | 19 | ENSMUSG00000116564 | Riok2    | 20 |
| ENSMUSG00000044279 | Crb3     | 20 | ENSMUSG00000024404 | Riok3    | 10 |
| ENSMUSG00000005362 | Crbn     | 20 | ENSMUSG00000046791 | Riox1    | 20 |
| ENSMUSG00000025532 | Crcp     | 12 | ENSMUSG00000022724 | Riox2    | 9  |
| ENSMUSG00000025958 | Creb1    | 1  | ENSMUSG00000021408 | Ripk1    | 20 |
| ENSMUSG00000028466 | Creb3    | 20 | ENSMUSG00000041135 | Ripk2    | 18 |
| ENSMUSG00000027230 | Creb3l1  | 20 | ENSMUSG00000005251 | Ripk4    | 20 |
| ENSMUSG00000038648 | Creb3l2  | 1  | ENSMUSG00000038604 | Ripor1   | 20 |
| ENSMUSG00000035041 | Creb3l3  | 20 | ENSMUSG00000036006 | Ripor2   | 18 |
| ENSMUSG00000053007 | Creb5    | 20 | ENSMUSG00000047897 | Ripply2  | 20 |
| ENSMUSG00000022521 | Crebbp   | 2  | ENSMUSG00000028057 | Rit1     | 20 |
| ENSMUSG00000032652 | Crebl2   | 20 | ENSMUSG00000057455 | Rit2     | 20 |
| ENSMUSG00000048249 | Crebrf   | 8  | ENSMUSG00000029600 | Rita1    | 20 |
| ENSMUSG00000051451 | Crebzf   | 1  | ENSMUSG00000039194 | Rlbp1    | 20 |
| ENSMUSG00000040713 | Creg1    | 18 | ENSMUSG00000049878 | Rlf      | 20 |
| ENSMUSG00000050967 | Creg2    | 5  | ENSMUSG00000056537 | Rlim     | 2  |
| ENSMUSG00000030284 | Credl1   | 19 | ENSMUSG00000024410 | Rmc1     | 20 |
| ENSMUSG00000023272 | Credl2   | 20 | ENSMUSG00000028229 | Rmdn1    | 20 |
| ENSMUSG00000063889 | Crem     | 20 | ENSMUSG00000036368 | Rmdn2    | 20 |
| ENSMUSG00000049796 | Crh      | 1  | ENSMUSG00000070730 | Rmdn3    | 1  |
| ENSMUSG00000021680 | Crhbp    | 5  | ENSMUSG00000035367 | Rmi1     | 9  |
| ENSMUSG00000018634 | Crhr1    | 20 | ENSMUSG00000019763 | Rmnd1    | 20 |
| ENSMUSG00000003476 | Crhr2    | 13 | ENSMUSG00000002222 | Rmnd5a   | 20 |
| ENSMUSG00000024074 | Crim1    | 18 | ENSMUSG00000001054 | Rmnd5b   | 9  |
| ENSMUSG00000006360 | Crip1    | 20 | ENSMUSG00000112117 | Rmst     | 17 |
| ENSMUSG00000006356 | Crip2    | 19 | ENSMUSG00000099021 | Rn7s1    | 10 |
| ENSMUSG00000023968 | Crip3    | 20 | ENSMUSG00000099250 | Rn7s2    | 12 |
| ENSMUSG00000024146 | Cript    | 1  | ENSMUSG00000092746 | Rn7s6    | 20 |
| ENSMUSG00000025776 | Crispld1 | 9  | ENSMUSG00000065037 | Rn7sk    | 12 |
| ENSMUSG00000031825 | Crispld2 | 18 | ENSMUSG00000035896 | Rnase1   | 20 |
| ENSMUSG00000017776 | Crk      | 20 | ENSMUSG00000021876 | Rnase4   | 20 |
| ENSMUSG00000006134 | Crkl     | 3  | ENSMUSG00000020630 | Rnaseh1  | 20 |
| ENSMUSG00000007888 | Crlf1    | 5  | ENSMUSG00000052926 | Rnaseh2a | 20 |
| ENSMUSG00000033467 | Crlf2    | 20 | ENSMUSG00000021932 | Rnaseh2b | 20 |
| ENSMUSG00000017561 | Crlf3    | 20 | ENSMUSG00000024925 | Rnaseh2c | 20 |
| ENSMUSG00000027357 | Crls1    | 20 | ENSMUSG00000093989 | Rnasek   | 20 |
| ENSMUSG00000029121 | Crmp1    | 19 | ENSMUSG00000066800 | Rnase1   | 20 |
| ENSMUSG00000031736 | Crnde    | 1  | ENSMUSG00000094724 | Rnaset2b | 9  |
| ENSMUSG00000001767 | Crnk1l   | 20 | ENSMUSG00000054855 | Rnd1     | 7  |
| ENSMUSG00000040860 | Crocc    | 9  | ENSMUSG00000001313 | Rnd2     | 2  |
| ENSMUSG00000084989 | Crocc2   | 14 | ENSMUSG00000017144 | Rnd3     | 20 |
| ENSMUSG00000003623 | Crot     | 20 | ENSMUSG00000041740 | Rnf10    | 20 |
| ENSMUSG00000043153 | Crppa    | 20 | ENSMUSG00000052656 | Rnf103   | 9  |
| ENSMUSG00000047657 | Crry-ps  | 1  | ENSMUSG00000028557 | Rnf11    | 9  |
| ENSMUSG00000042401 | Crtac1   | 5  | ENSMUSG00000032217 | Rnf111   | 12 |
| ENSMUSG00000032431 | Crtap    | 20 | ENSMUSG00000010086 | Rnf112   | 20 |
| ENSMUSG00000003575 | Crtc1    | 9  | ENSMUSG00000036537 | Rnf113a1 | 1  |
| ENSMUSG00000027936 | Crtc2    | 20 | ENSMUSG00000098134 | Rnf113a2 | 20 |



|                    |            |    |                    |           |    |
|--------------------|------------|----|--------------------|-----------|----|
| ENSMUSG0000030527  | Crtc3      | 1  | ENSMUSG0000006418  | Rnf114    | 20 |
| ENSMUSG0000020038  | Cry1       | 20 | ENSMUSG0000028098  | Rnf115    | 19 |
| ENSMUSG0000068742  | Cry2       | 1  | ENSMUSG0000070426  | Rnf121    | 20 |
| ENSMUSG0000032060  | Cryab      | 16 | ENSMUSG0000039328  | Rnf122    | 20 |
| ENSMUSG0000029343  | Crybb1     | 20 | ENSMUSG0000041528  | Rnf123    | 20 |
| ENSMUSG0000029352  | Crybb3     | 20 | ENSMUSG0000033107  | Rnf125    | 20 |
| ENSMUSG0000019866  | Crybg1     | 18 | ENSMUSG0000035890  | Rnf126    | 19 |
| ENSMUSG0000012123  | Crybg2     | 20 | ENSMUSG0000031438  | Rnf128    | 20 |
| ENSMUSG0000022723  | Crybg3     | 20 | ENSMUSG0000036503  | Rnf13     | 16 |
| ENSMUSG0000038135  | Crygn      | 20 | ENSMUSG0000020376  | Rnf130    | 19 |
| ENSMUSG0000021947  | Cryl1      | 20 | ENSMUSG0000020707  | Rnf135    | 20 |
| ENSMUSG0000030905  | Crym       | 3  | ENSMUSG0000024317  | Rnf138    | 20 |
| ENSMUSG0000028199  | Cryz       | 20 | ENSMUSG0000083695  | Rnf138rt1 | 20 |
| ENSMUSG0000058240  | Cryz1      | 12 | ENSMUSG0000037075  | Rnf139    | 3  |
| ENSMUSG0000033488  | Cryz2      | 20 | ENSMUSG0000060450  | Rnf14     | 20 |
| ENSMUSG0000005683  | Cs         | 20 | ENSMUSG0000030788  | Rnf141    | 18 |
| ENSMUSG0000023044  | Csad       | 20 | ENSMUSG0000020642  | Rnf144a   | 1  |
| ENSMUSG0000042109  | Csdc2      | 18 | ENSMUSG0000038068  | Rnf144b   | 16 |
| ENSMUSG0000068823  | Csde1      | 3  | ENSMUSG0000019189  | Rnf145    | 1  |
| ENSMUSG0000002718  | Cse1l      | 17 | ENSMUSG0000038876  | Rnf146    | 2  |
| ENSMUSG0000014599  | Csf1       | 16 | ENSMUSG0000048234  | Rnf149    | 20 |
| ENSMUSG0000024621  | Csf1r      | 20 | ENSMUSG0000047747  | Rnf150    | 9  |
| ENSMUSG0000059326  | Csf2ra     | 20 | ENSMUSG0000047496  | Rnf152    | 18 |
| ENSMUSG0000071713  | Csf2rb     | 20 | ENSMUSG0000052949  | Rnf157    | 20 |
| ENSMUSG0000071714  | Csf2rb2    | 12 | ENSMUSG0000025427  | Rnf165    | 20 |
| ENSMUSG0000028859  | Csf3r      | 20 | ENSMUSG0000014470  | Rnf166    | 9  |
| ENSMUSG0000036356  | Csgalnact1 | 9  | ENSMUSG0000040746  | Rnf167    | 18 |
| ENSMUSG0000042042  | Csgalnact2 | 20 | ENSMUSG0000014074  | Rnf168    | 3  |
| ENSMUSG0000032312  | Csk        | 20 | ENSMUSG0000058761  | Rnf169    | 20 |
| ENSMUSG0000060924  | Csmd1      | 9  | ENSMUSG0000000365  | Rnf17     | 20 |
| ENSMUSG0000028804  | Csmd2      | 1  | ENSMUSG0000013878  | Rnf170    | 20 |
| ENSMUSG0000022311  | Csmd3      | 6  | ENSMUSG00000101800 | Rnf170-ps | 20 |
| ENSMUSG0000024576  | Csnk1a1    | 2  | ENSMUSG0000021720  | Rnf180    | 1  |
| ENSMUSG0000025162  | Csnk1d     | 1  | ENSMUSG0000044164  | Rnf182    | 5  |
| ENSMUSG0000022433  | Csnk1e     | 20 | ENSMUSG0000020448  | Rnf185    | 20 |
| ENSMUSG0000032384  | Csnk1g1    | 9  | ENSMUSG0000020496  | Rnf187    | 20 |
| ENSMUSG0000003345  | Csnk1g2    | 1  | ENSMUSG0000022280  | Rnf19a    | 2  |
| ENSMUSG0000073563  | Csnk1g3    | 20 | ENSMUSG0000028793  | Rnf19b    | 20 |
| ENSMUSG0000074698  | Csnk2a1    | 20 | ENSMUSG0000026484  | Rnf2      | 4  |
| ENSMUSG0000046707  | Csnk2a2    | 20 | ENSMUSG0000028309  | Rnf20     | 20 |
| ENSMUSG00000101523 | Csnk2a3    | 20 | ENSMUSG0000058498  | Rnf207    | 1  |
| ENSMUSG0000024387  | Csnk2b     | 20 | ENSMUSG0000044628  | Rnf208    | 12 |
| ENSMUSG0000068167  | Csnka2ip   | 12 | ENSMUSG0000070327  | Rnf213    | 20 |
| ENSMUSG0000032911  | Cspg4      | 20 | ENSMUSG0000042790  | Rnf214    | 5  |
| ENSMUSG0000032482  | Cspg5      | 20 | ENSMUSG0000003581  | Rnf215    | 20 |
| ENSMUSG0000056763  | Cspp1      | 20 | ENSMUSG0000045078  | Rnf216    | 12 |
| ENSMUSG0000032515  | Csrnp1     | 20 | ENSMUSG0000063760  | Rnf217    | 1  |
| ENSMUSG0000044636  | Csrnp2     | 12 | ENSMUSG0000022120  | Rnf219    | 1  |
| ENSMUSG0000044647  | Csrnp3     | 1  | ENSMUSG0000028677  | Rnf220    | 18 |
| ENSMUSG0000026421  | Csrp1      | 16 | ENSMUSG00000110404 | Rnf223    | 20 |
| ENSMUSG0000020186  | Csrp2      | 13 | ENSMUSG0000033967  | Rnf225    | 20 |
| ENSMUSG0000027447  | Cst3       | 19 | ENSMUSG0000043419  | Rnf227    | 18 |
| ENSMUSG0000024846  | Cst6       | 20 | ENSMUSG0000048911  | Rnf24     | 3  |
| ENSMUSG0000068129  | Cst7       | 20 | ENSMUSG0000026171  | Rnf25     | 20 |
| ENSMUSG0000047363  | Cstad      | 20 | ENSMUSG0000053128  | Rnf26     | 20 |

|                    |            |    |                    |         |    |
|--------------------|------------|----|--------------------|---------|----|
| ENSMUSG0000005054  | Cstb       | 20 | ENSMUSG00000047098 | Rnf31   | 20 |
| ENSMUSG00000027498 | Cstf1      | 20 | ENSMUSG00000029130 | Rnf32   | 20 |
| ENSMUSG00000031256 | Cstf2      | 20 | ENSMUSG00000029474 | Rnf34   | 20 |
| ENSMUSG00000053536 | Cstf2t     | 12 | ENSMUSG00000035696 | Rnf38   | 20 |
| ENSMUSG00000027176 | Cstf3      | 12 | ENSMUSG00000036492 | Rnf39   | 20 |
| ENSMUSG00000106106 | CT010467.1 | 20 | ENSMUSG00000029110 | Rnf4    | 1  |
| ENSMUSG00000037373 | Ctbp1      | 20 | ENSMUSG00000030816 | Rnf40   | 20 |
| ENSMUSG00000030970 | Ctbp2      | 20 | ENSMUSG00000025373 | Rnf41   | 20 |
| ENSMUSG00000028189 | Ctbs       | 20 | ENSMUSG00000034177 | Rnf43   | 20 |
| ENSMUSG00000020898 | Ctc1       | 20 | ENSMUSG00000034928 | Rnf44   | 9  |
| ENSMUSG00000005698 | Ctcf       | 9  | ENSMUSG00000015478 | Rnf5    | 2  |
| ENSMUSG00000018559 | Ctdnep1    | 20 | ENSMUSG00000029634 | Rnf6    | 13 |
| ENSMUSG00000033323 | Ctdp1      | 19 | ENSMUSG00000051234 | Rnf7    | 3  |
| ENSMUSG00000026176 | Ctdsp1     | 20 | ENSMUSG00000090083 | Rnf8    | 20 |
| ENSMUSG00000078429 | Ctdsp2     | 9  | ENSMUSG00000020521 | Rnft1   | 20 |
| ENSMUSG00000047409 | Ctdspl     | 20 | ENSMUSG00000032850 | Rnft2   | 20 |
| ENSMUSG00000033411 | Ctdspl2    | 2  | ENSMUSG00000028274 | Rngtt   | 7  |
| ENSMUSG00000042340 | Ctf1       | 20 | ENSMUSG00000038650 | Rnh1    | 20 |
| ENSMUSG00000028179 | Cth        | 20 | ENSMUSG00000071573 | Rnls    | 20 |
| ENSMUSG00000052928 | Ctif       | 18 | ENSMUSG00000009535 | Rnmt    | 20 |
| ENSMUSG00000044258 | Ctla2a     | 20 | ENSMUSG00000027981 | Rnpc3   | 8  |
| ENSMUSG00000037815 | Ctnna1     | 1  | ENSMUSG00000041926 | Rnpep   | 20 |
| ENSMUSG00000063063 | Ctnna2     | 3  | ENSMUSG00000026269 | Rnpepl1 | 20 |
| ENSMUSG00000060843 | Ctnna3     | 20 | ENSMUSG00000034681 | Rnps1   | 20 |
| ENSMUSG00000038816 | Ctnnal1    | 20 | ENSMUSG00000077323 | Rnu11   | 10 |
| ENSMUSG00000006932 | Ctnnb1     | 9  | ENSMUSG00000065176 | Rnu12   | 10 |
| ENSMUSG00000028988 | Ctnnbip1   | 18 | ENSMUSG00000095969 | Rnu1a1  | 20 |
| ENSMUSG00000027649 | Ctnnbl1    | 18 | ENSMUSG00000095580 | Rnu1b1  | 20 |
| ENSMUSG00000034101 | Ctnnd1     | 20 | ENSMUSG00000065773 | Rnu1b6  | 10 |
| ENSMUSG00000022240 | Ctnnd2     | 20 | ENSMUSG00000065944 | Rnu2-10 | 20 |
| ENSMUSG00000005949 | Ctns       | 20 | ENSMUSG00000095892 | Rnu5g   | 10 |
| ENSMUSG00000028633 | Ctps       | 20 | ENSMUSG00000065701 | Rny1    | 10 |
| ENSMUSG00000031360 | Ctps2      | 9  | ENSMUSG00000064945 | Rny3    | 10 |
| ENSMUSG00000005609 | Ctr9       | 18 | ENSMUSG00000018199 | Ro60    | 19 |
| ENSMUSG00000031896 | Ctrl       | 19 | ENSMUSG00000022883 | Robo1   | 20 |
| ENSMUSG00000017760 | Ctsa       | 12 | ENSMUSG00000052516 | Robo2   | 6  |
| ENSMUSG00000021939 | Ctsb       | 3  | ENSMUSG00000032128 | Robo3   | 9  |
| ENSMUSG00000030560 | Ctsc       | 20 | ENSMUSG00000032125 | Robo4   | 20 |
| ENSMUSG00000007891 | Ctsd       | 19 | ENSMUSG00000024290 | Rock1   | 20 |
| ENSMUSG00000083282 | Ctsf       | 20 | ENSMUSG00000020580 | Rock2   | 7  |
| ENSMUSG00000032359 | Ctsh       | 20 | ENSMUSG00000022540 | Rogdi   | 20 |
| ENSMUSG00000028111 | Ctsk       | 20 | ENSMUSG00000071648 | Rom1    | 12 |
| ENSMUSG00000021477 | Ctsl       | 20 | ENSMUSG00000067847 | Romo1   | 12 |
| ENSMUSG00000028015 | Ctso       | 20 | ENSMUSG00000035305 | Ror1    | 9  |
| ENSMUSG00000038642 | Ctss       | 12 | ENSMUSG00000021464 | Ror2    | 20 |
| ENSMUSG00000016256 | Ctsz       | 19 | ENSMUSG00000032238 | Rora    | 18 |
| ENSMUSG00000031078 | Cttn       | 20 | ENSMUSG00000036192 | Rorb    | 18 |
| ENSMUSG00000000416 | Cttnbp2    | 9  | ENSMUSG00000028150 | Rorc    | 20 |
| ENSMUSG00000062127 | Cttnbp2nl  | 3  | ENSMUSG00000060090 | Rp2     | 20 |
| ENSMUSG00000038888 | Ctu1       | 20 | ENSMUSG00000032239 | Rp9     | 2  |
| ENSMUSG00000049482 | Ctu2       | 20 | ENSMUSG00000000751 | Rpa1    | 20 |
| ENSMUSG00000048644 | Ctxn1      | 9  | ENSMUSG00000028884 | Rpa2    | 20 |
| ENSMUSG00000074872 | Ctxn2      | 1  | ENSMUSG00000012483 | Rpa3    | 19 |
| ENSMUSG00000069372 | Ctxn3      | 9  | ENSMUSG00000018449 | Rpain   | 12 |
| ENSMUSG00000026726 | Cubn       | 10 | ENSMUSG00000034032 | Rpap1   | 20 |

|                    |          |    |                    |            |    |
|--------------------|----------|----|--------------------|------------|----|
| ENSMUSG00000018378 | Cuedc1   | 20 | ENSMUSG00000033773 | Rpap2      | 20 |
| ENSMUSG00000036748 | Cuedc2   | 12 | ENSMUSG00000022466 | Rpap3      | 20 |
| ENSMUSG00000029686 | Cul1     | 20 | ENSMUSG00000026005 | Rpe        | 9  |
| ENSMUSG00000024231 | Cul2     | 20 | ENSMUSG00000028174 | Rpe65      | 20 |
| ENSMUSG00000004364 | Cul3     | 12 | ENSMUSG00000028187 | Rpf1       | 20 |
| ENSMUSG00000031446 | Cul4a    | 1  | ENSMUSG00000038510 | Rpf2       | 20 |
| ENSMUSG00000031095 | Cul4b    | 13 | ENSMUSG00000031174 | Rpgr       | 18 |
| ENSMUSG00000032030 | Cul5     | 2  | ENSMUSG00000057132 | Rpgrip1    | 10 |
| ENSMUSG00000038545 | Cul7     | 9  | ENSMUSG00000033282 | Rpgrip1l   | 20 |
| ENSMUSG00000040327 | Cul9     | 20 | ENSMUSG00000029608 | Rph3a      | 1  |
| ENSMUSG00000024194 | Cuta     | 20 | ENSMUSG00000020847 | Rph3al     | 20 |
| ENSMUSG00000026870 | Cutal    | 20 | ENSMUSG00000053604 | Rpia       | 1  |
| ENSMUSG00000025193 | Cutc     | 14 | ENSMUSG00000008682 | Rpl10      | 19 |
| ENSMUSG00000029705 | Cux1     | 20 | ENSMUSG00000058443 | Rpl10-ps3  | 20 |
| ENSMUSG00000042589 | Cux2     | 18 | ENSMUSG00000110679 | Rpl10-ps5  | 20 |
| ENSMUSG00000004096 | Cwc15    | 20 | ENSMUSG00000037805 | Rpl10a     | 12 |
| ENSMUSG00000027014 | Cwc22    | 9  | ENSMUSG00000084416 | Rpl10a-ps1 | 12 |
| ENSMUSG00000018541 | Cwc25    | 20 | ENSMUSG00000059291 | Rpl11      | 3  |
| ENSMUSG00000021715 | Cwc27    | 20 | ENSMUSG00000038900 | Rpl12      | 3  |
| ENSMUSG00000025200 | Cwf19l1  | 20 | ENSMUSG00000000740 | Rpl13      | 12 |
| ENSMUSG00000025898 | Cwf19l2  | 20 | ENSMUSG00000082806 | Rpl13-ps1  | 20 |
| ENSMUSG00000029154 | Cwh43    | 20 | ENSMUSG00000059835 | Rpl13-ps3  | 10 |
| ENSMUSG00000031778 | Cx3cl1   | 9  | ENSMUSG00000059776 | Rpl13-ps6  | 12 |
| ENSMUSG00000052336 | Cx3cr1   | 20 | ENSMUSG00000074129 | Rpl13a     | 12 |
| ENSMUSG00000022865 | Cxadr    | 20 | ENSMUSG00000062083 | Rpl13a-ps1 | 20 |
| ENSMUSG00000061353 | Cxcl12   | 9  | ENSMUSG00000025794 | Rpl14      | 12 |
| ENSMUSG00000021508 | Cxcl14   | 3  | ENSMUSG00000046721 | Rpl14-ps1  | 12 |
| ENSMUSG00000018920 | Cxcl16   | 20 | ENSMUSG00000012405 | Rpl15      | 20 |
| ENSMUSG00000024560 | Cxxc1    | 20 | ENSMUSG00000098915 | Rpl15-ps2  | 7  |
| ENSMUSG00000044365 | Cxxc4    | 3  | ENSMUSG00000061167 | Rpl15-ps3  | 20 |
| ENSMUSG00000046668 | Cxxc5    | 18 | ENSMUSG00000108442 | Rpl15-ps5  | 18 |
| ENSMUSG00000019590 | Cyb561   | 20 | ENSMUSG00000062328 | Rpl17      | 20 |
| ENSMUSG00000034445 | Cyb561a3 | 12 | ENSMUSG00000081895 | Rpl17-ps10 | 12 |
| ENSMUSG00000048796 | Cyb561d1 | 20 | ENSMUSG00000113948 | Rpl17-ps3  | 20 |
| ENSMUSG00000037190 | Cyb561d2 | 20 | ENSMUSG00000084345 | Rpl17-ps4  | 20 |
| ENSMUSG00000024646 | Cyb5a    | 19 | ENSMUSG00000081855 | Rpl17-ps5  | 20 |
| ENSMUSG00000031924 | Cyb5b    | 20 | ENSMUSG00000082035 | Rpl17-ps8  | 2  |
| ENSMUSG00000044795 | Cyb5d1   | 7  | ENSMUSG00000066543 | Rpl17-ps9  | 3  |
| ENSMUSG00000057778 | Cyb5d2   | 20 | ENSMUSG00000059070 | Rpl18      | 12 |
| ENSMUSG00000026456 | Cyb5r1   | 1  | ENSMUSG00000053173 | Rpl18-ps2  | 20 |
| ENSMUSG00000048065 | Cyb5r2   | 20 | ENSMUSG00000045128 | Rpl18a     | 3  |
| ENSMUSG00000018042 | Cyb5r3   | 1  | ENSMUSG00000059033 | Rpl18a-ps1 | 10 |
| ENSMUSG00000032872 | Cyb5r4   | 20 | ENSMUSG00000017404 | Rpl19      | 12 |
| ENSMUSG00000028621 | Cyb5rl   | 20 | ENSMUSG00000064281 | Rpl19-ps1  | 12 |
| ENSMUSG00000006519 | Cyba     | 19 | ENSMUSG00000081094 | Rpl19-ps11 | 3  |
| ENSMUSG00000015340 | Cybb     | 20 | ENSMUSG00000082109 | Rpl19-ps12 | 20 |
| ENSMUSG00000039294 | Cybc1    | 20 | ENSMUSG00000116090 | Rpl19-ps6  | 12 |
| ENSMUSG00000027015 | Cybrd1   | 20 | ENSMUSG00000117405 | Rpl19-ps7  | 1  |
| ENSMUSG00000022551 | Cyc1     | 12 | ENSMUSG00000041453 | Rpl21      | 7  |
| ENSMUSG00000063694 | Cycs     | 20 | ENSMUSG00000105359 | Rpl21-ps10 | 2  |
| ENSMUSG00000030447 | Cyfi1    | 20 | ENSMUSG00000105144 | Rpl21-ps11 | 20 |
| ENSMUSG00000020340 | Cyfi2    | 9  | ENSMUSG00000058700 | Rpl21-ps12 | 20 |
| ENSMUSG00000020810 | Cygb     | 12 | ENSMUSG00000083596 | Rpl21-ps15 | 12 |
| ENSMUSG00000053929 | Cyhr1    | 20 | ENSMUSG00000060566 | Rpl21-ps3  | 12 |
| ENSMUSG00000036712 | Cyld     | 9  | ENSMUSG00000072714 | Rpl21-ps4  | 9  |

|                    |               |    |                    |             |    |
|--------------------|---------------|----|--------------------|-------------|----|
| ENSMUSG0000032323  | Cyp11a1       | 20 | ENSMUSG00000059912 | Rpl21-ps6   | 20 |
| ENSMUSG0000024087  | Cyp1b1        | 20 | ENSMUSG00000094256 | Rpl21-ps7   | 20 |
| ENSMUSG0000049439  | Cyp20a1       | 20 | ENSMUSG00000061684 | Rpl21-ps8   | 20 |
| ENSMUSG0000063415  | Cyp26b1       | 18 | ENSMUSG00000028936 | Rpl22       | 12 |
| ENSMUSG0000026170  | Cyp27a1       | 20 | ENSMUSG00000080877 | Rpl22-ps1   | 12 |
| ENSMUSG0000006724  | Cyp27b1       | 20 | ENSMUSG00000039221 | Rpl22i1     | 12 |
| ENSMUSG00000005547 | Cyp2a5        | 9  | ENSMUSG00000071415 | Rpl23       | 12 |
| ENSMUSG00000061740 | Cyp2d22       | 20 | ENSMUSG00000058546 | Rpl23a      | 20 |
| ENSMUSG00000022445 | Cyp2d26       | 20 | ENSMUSG00000083723 | Rpl23a-ps14 | 20 |
| ENSMUSG00000081225 | Cyp2j12       | 20 | ENSMUSG00000081968 | Rpl23a-ps2  | 20 |
| ENSMUSG00000052914 | Cyp2j6        | 19 | ENSMUSG00000078126 | Rpl23a-ps3  | 12 |
| ENSMUSG00000015224 | Cyp2j9        | 20 | ENSMUSG00000098274 | Rpl24       | 12 |
| ENSMUSG00000030670 | Cyp2r1        | 9  | ENSMUSG00000060938 | Rpl26       | 3  |
| ENSMUSG00000040703 | Cyp2s1        | 19 | ENSMUSG00000063316 | Rpl27       | 20 |
| ENSMUSG00000027983 | Cyp2u1        | 18 | ENSMUSG00000073640 | Rpl27-ps3   | 20 |
| ENSMUSG00000023963 | Cyp39a1       | 20 | ENSMUSG00000046364 | Rpl27a      | 20 |
| ENSMUSG00000029727 | Cyp3a13       | 20 | ENSMUSG00000061488 | Rpl27a-ps1  | 20 |
| ENSMUSG00000021259 | Cyp46a1       | 9  | ENSMUSG00000030432 | Rpl28       | 12 |
| ENSMUSG00000024055 | Cyp4f13       | 2  | ENSMUSG00000058603 | Rpl28-ps1   | 12 |
| ENSMUSG00000024292 | Cyp4f14       | 20 | ENSMUSG00000079942 | Rpl28-ps3   | 20 |
| ENSMUSG00000073424 | Cyp4f15       | 20 | ENSMUSG00000048758 | Rpl29       | 3  |
| ENSMUSG00000048440 | Cyp4f16       | 20 | ENSMUSG00000094772 | Rpl29-ps2   | 20 |
| ENSMUSG00000091586 | Cyp4f17       | 20 | ENSMUSG00000091785 | Rpl29-ps5   | 20 |
| ENSMUSG00000079057 | Cyp4v3        | 20 | ENSMUSG00000060036 | Rpl3        | 20 |
| ENSMUSG00000047155 | Cyp4x1        | 1  | ENSMUSG00000084349 | Rpl3-ps1    | 12 |
| ENSMUSG00000086896 | Cyp4x1os      | 20 | ENSMUSG00000084131 | Rpl3-ps2    | 20 |
| ENSMUSG00000001467 | Cyp51         | 9  | ENSMUSG00000058600 | Rpl30       | 20 |
| ENSMUSG00000039519 | Cyp7b1        | 20 | ENSMUSG00000057696 | Rpl30-ps1   | 20 |
| ENSMUSG00000046806 | Cyren         | 6  | ENSMUSG00000083411 | Rpl30-ps10  | 20 |
| ENSMUSG00000062563 | Cys1          | 1  | ENSMUSG00000085791 | Rpl30-ps9   | 9  |
| ENSMUSG00000052821 | Cysltr1       | 20 | ENSMUSG00000073702 | Rpl31       | 3  |
| ENSMUSG00000033470 | Cysltr2       | 20 | ENSMUSG00000070667 | Rpl31-ps10  | 20 |
| ENSMUSG00000046727 | Cystm1        | 19 | ENSMUSG00000116648 | Rpl31-ps12  | 18 |
| ENSMUSG00000017132 | Cyth1         | 9  | ENSMUSG00000051723 | Rpl31-ps13  | 20 |
| ENSMUSG00000003269 | Cyth2         | 3  | ENSMUSG00000097803 | Rpl31-ps16  | 20 |
| ENSMUSG00000018001 | Cyth3         | 20 | ENSMUSG00000067870 | Rpl31-ps8   | 12 |
| ENSMUSG00000018008 | Cyth4         | 20 | ENSMUSG00000094122 | Rpl31-ps9   | 20 |
| ENSMUSG00000041134 | Cyrr1         | 12 | ENSMUSG00000057841 | Rpl32       | 12 |
| ENSMUSG00000028608 | Czib          | 8  | ENSMUSG00000111356 | Rpl32i      | 3  |
| ENSMUSG00000078700 | D030028A08Rik | 5  | ENSMUSG00000062006 | Rpl34       | 12 |
| ENSMUSG00000085886 | D030047H15Rik | 20 | ENSMUSG00000068396 | Rpl34-ps1   | 12 |
| ENSMUSG00000086296 | D030055H07Rik | 13 | ENSMUSG00000062997 | Rpl35       | 19 |
| ENSMUSG00000047044 | D030056L22Rik | 20 | ENSMUSG00000060636 | Rpl35a      | 12 |
| ENSMUSG00000097393 | D030068K23Rik | 18 | ENSMUSG00000094664 | Rpl35a-ps6  | 20 |
| ENSMUSG00000020255 | D10Wsu102e    | 8  | ENSMUSG00000057863 | Rpl36       | 12 |
| ENSMUSG00000041623 | D11Wsu47e     | 20 | ENSMUSG00000091845 | Rpl36-ps12  | 3  |
| ENSMUSG00000107208 | D130004A15Rik | 20 | ENSMUSG00000024205 | Rpl36-ps2   | 12 |
| ENSMUSG00000054304 | D130007C19Rik | 2  | ENSMUSG00000066629 | Rpl36-ps3   | 12 |
| ENSMUSG00000097287 | D130017N08Rik | 1  | ENSMUSG00000079435 | Rpl36a      | 12 |
| ENSMUSG00000104145 | D130019J16Rik | 20 | ENSMUSG00000060377 | Rpl36a-ps1  | 20 |
| ENSMUSG00000097121 | D130020L05Rik | 20 | ENSMUSG00000105388 | Rpl36a-ps2  | 12 |
| ENSMUSG00000079038 | D130040H23Rik | 20 | ENSMUSG00000071141 | Rpl36a-ps3  | 20 |
| ENSMUSG00000006711 | D130043K22Rik | 16 | ENSMUSG00000049751 | Rpl36al     | 12 |
| ENSMUSG00000092627 | D130058E05Rik | 18 | ENSMUSG00000041841 | Rpl37       | 12 |
| ENSMUSG00000114598 | D130062J10Rik | 2  | ENSMUSG00000046330 | Rpl37a      | 10 |

|                    |               |    |                    |            |    |
|--------------------|---------------|----|--------------------|------------|----|
| ENSMUSG0000022864  | D16Ertd472e   | 20 | ENSMUSG00000072692 | Rpl37rt    | 12 |
| ENSMUSG0000043311  | D17H6S53E     | 18 | ENSMUSG00000057322 | Rpl38      | 12 |
| ENSMUSG0000044768  | D1Ertd622e    | 20 | ENSMUSG00000083326 | Rpl38-ps1  | 12 |
| ENSMUSG00000087176 | D230022J07Rik | 1  | ENSMUSG00000080921 | Rpl38-ps2  | 6  |
| ENSMUSG00000031889 | D230025D16Rik | 20 | ENSMUSG00000079641 | Rpl39      | 10 |
| ENSMUSG00000113196 | D230049E03Rik | 20 | ENSMUSG00000036305 | Rpl39-ps   | 10 |
| ENSMUSG00000073609 | D2hgdh        | 13 | ENSMUSG00000002500 | Rpl3l      | 20 |
| ENSMUSG00000087269 | D330023K18Rik | 20 | ENSMUSG00000032399 | Rpl4       | 12 |
| ENSMUSG00000073437 | D330041H03Rik | 20 | ENSMUSG00000093674 | Rpl41      | 3  |
| ENSMUSG00000085316 | D330050G23Rik | 20 | ENSMUSG00000058558 | Rpl5       | 12 |
| ENSMUSG00000025766 | D3Ertd751e    | 20 | ENSMUSG00000082193 | Rpl5-ps1   | 20 |
| ENSMUSG00000103821 | D430013B06Rik | 20 | ENSMUSG00000082064 | Rpl5-ps2   | 20 |
| ENSMUSG00000097559 | D430018E03Rik | 20 | ENSMUSG00000029614 | Rpl6       | 12 |
| ENSMUSG00000094910 | D430019H16Rik | 18 | ENSMUSG00000091086 | Rpl6l      | 20 |
| ENSMUSG00000112980 | D430020J02Rik | 1  | ENSMUSG00000043716 | Rpl7       | 3  |
| ENSMUSG00000097466 | D430036J16Rik | 9  | ENSMUSG00000106926 | Rpl7-ps7   | 20 |
| ENSMUSG00000087589 | D430040D24Rik | 20 | ENSMUSG00000062647 | Rpl7a      | 3  |
| ENSMUSG00000068373 | D430041D05Rik | 9  | ENSMUSG00000101502 | Rpl7a-ps10 | 20 |
| ENSMUSG00000032743 | D430042O09Rik | 20 | ENSMUSG00000067147 | Rpl7a-ps11 | 12 |
| ENSMUSG00000107610 | D530018E20Rik | 20 | ENSMUSG00000071052 | Rpl7a-ps5  | 20 |
| ENSMUSG00000029190 | D5Ertd579e    | 9  | ENSMUSG00000106258 | Rpl7a-ps7  | 10 |
| ENSMUSG00000097293 | D630002J18Rik | 20 | ENSMUSG00000063888 | Rpl7l1     | 13 |
| ENSMUSG00000037813 | D630003M21Rik | 12 | ENSMUSG00000003970 | Rpl8       | 10 |
| ENSMUSG00000090168 | D630014O11Rik | 20 | ENSMUSG00000047215 | Rpl9       | 3  |
| ENSMUSG00000044816 | D630023F18Rik | 1  | ENSMUSG00000094989 | Rpl9-ps4   | 12 |
| ENSMUSG00000085772 | D630024D03Rik | 13 | ENSMUSG00000062456 | Rpl9-ps6   | 12 |
| ENSMUSG00000106837 | D630030B08Rik | 20 | ENSMUSG00000047965 | Rpl9-ps7   | 12 |
| ENSMUSG00000112237 | D630033A02Rik | 20 | ENSMUSG00000067274 | Rplp0      | 3  |
| ENSMUSG00000091007 | D630036H23Rik | 20 | ENSMUSG00000007892 | Rplp1      | 3  |
| ENSMUSG00000063455 | D630045J12Rik | 19 | ENSMUSG00000025508 | Rplp2      | 3  |
| ENSMUSG00000030347 | D6Wsu163e     | 20 | ENSMUSG00000030062 | Rpn1       | 20 |
| ENSMUSG00000073478 | D730003115Rik | 20 | ENSMUSG00000027642 | Rpn2       | 20 |
| ENSMUSG00000115685 | D730044K07Rik | 20 | ENSMUSG00000023156 | Rpp14      | 20 |
| ENSMUSG00000054622 | D730045B01Rik | 1  | ENSMUSG00000024446 | Rpp21      | 20 |
| ENSMUSG00000109198 | D7Bwg0826e    | 20 | ENSMUSG00000062309 | Rpp25      | 3  |
| ENSMUSG00000030994 | D7Ertd443e    | 9  | ENSMUSG00000036114 | Rpp25l     | 20 |
| ENSMUSG00000111828 | D830035M03Rik | 20 | ENSMUSG00000024800 | Rpp30      | 20 |
| ENSMUSG00000107994 | D830050J10Rik | 20 | ENSMUSG00000049950 | Rpp38      | 20 |
| ENSMUSG00000019362 | D8Ertd738e    | 10 | ENSMUSG00000021418 | Rpp40      | 1  |
| ENSMUSG00000042874 | D930007J09Rik | 11 | ENSMUSG00000092837 | Rpph1      | 10 |
| ENSMUSG00000097392 | D930016D06Rik | 1  | ENSMUSG00000040446 | Rprd1a     | 9  |
| ENSMUSG00000097083 | D930019O06Rik | 20 | ENSMUSG00000027651 | Rprd1b     | 20 |
| ENSMUSG00000047642 | D930020B18Rik | 9  | ENSMUSG00000028106 | Rprd2      | 7  |
| ENSMUSG00000102553 | D930036K23Rik | 20 | ENSMUSG00000075334 | Rprm       | 1  |
| ENSMUSG00000052563 | D930048N14Rik | 20 | ENSMUSG00000046215 | Rprml      | 18 |
| ENSMUSG00000034574 | Daam1         | 9  | ENSMUSG00000052146 | Rps10      | 20 |
| ENSMUSG00000040260 | Daam2         | 20 | ENSMUSG00000060438 | Rps10-ps1  | 20 |
| ENSMUSG00000028519 | Dab1          | 9  | ENSMUSG00000099764 | Rps10-ps2  | 12 |
| ENSMUSG00000022150 | Dab2          | 20 | ENSMUSG00000003429 | Rps11      | 12 |
| ENSMUSG00000026883 | Dab2ip        | 9  | ENSMUSG00000090516 | Rps11-ps1  | 20 |
| ENSMUSG00000055639 | Dach1         | 9  | ENSMUSG00000061983 | Rps12      | 3  |
| ENSMUSG00000025592 | Dach2         | 1  | ENSMUSG00000082746 | Rps12-ps1  | 20 |
| ENSMUSG00000044548 | Dact1         | 6  | ENSMUSG00000070692 | Rps12-ps10 | 2  |
| ENSMUSG00000048826 | Dact2         | 18 | ENSMUSG00000098181 | Rps12-ps24 | 20 |
| ENSMUSG00000078794 | Dact3         | 20 | ENSMUSG00000081103 | Rps12-ps26 | 20 |

|                    |          |    |                    |            |    |
|--------------------|----------|----|--------------------|------------|----|
| ENSMUSG0000022174  | Dad1     | 20 | ENSMUSG00000067038 | Rps12-ps3  | 12 |
| ENSMUSG0000039952  | Dag1     | 7  | ENSMUSG00000109509 | Rps12-ps4  | 20 |
| ENSMUSG0000035735  | Dagla    | 20 | ENSMUSG00000069862 | Rps12-ps9  | 20 |
| ENSMUSG0000039206  | Daglb    | 20 | ENSMUSG00000078087 | Rps12l1    | 12 |
| ENSMUSG00000099784 | Dalir    | 20 | ENSMUSG00000090862 | Rps13      | 12 |
| ENSMUSG0000019039  | Dalrd3   | 20 | ENSMUSG00000066362 | Rps13-ps1  | 20 |
| ENSMUSG00000106943 | Dancr    | 20 | ENSMUSG00000069972 | Rps13-ps2  | 12 |
| ENSMUSG00000053226 | Dand5    | 20 | ENSMUSG00000081378 | Rps13-ps4  | 20 |
| ENSMUSG00000039168 | Dap      | 20 | ENSMUSG00000024608 | Rps14      | 12 |
| ENSMUSG00000068921 | Dap3     | 20 | ENSMUSG00000063457 | Rps15      | 12 |
| ENSMUSG00000021559 | Dapk1    | 15 | ENSMUSG00000071419 | Rps15-ps2  | 12 |
| ENSMUSG00000032380 | Dapk2    | 20 | ENSMUSG00000118264 | Rps15-ps3  | 20 |
| ENSMUSG00000034974 | Dapk3    | 1  | ENSMUSG00000008683 | Rps15a     | 2  |
| ENSMUSG00000028159 | Dapp1    | 20 | ENSMUSG00000084314 | Rps15a-ps3 | 20 |
| ENSMUSG00000026356 | Dars     | 18 | ENSMUSG00000083757 | Rps15a-ps4 | 12 |
| ENSMUSG00000026709 | Dars2    | 20 | ENSMUSG00000067058 | Rps15a-ps5 | 12 |
| ENSMUSG00000053161 | Daw1     | 14 | ENSMUSG00000083022 | Rps15a-ps6 | 20 |
| ENSMUSG00000002307 | Daxx     | 20 | ENSMUSG00000081087 | Rps15a-ps7 | 20 |
| ENSMUSG00000069565 | Dazap1   | 20 | ENSMUSG00000037563 | Rps16      | 12 |
| ENSMUSG00000000346 | Dazap2   | 1  | ENSMUSG00000060419 | Rps16-ps2  | 3  |
| ENSMUSG00000010592 | Dazl     | 9  | ENSMUSG00000061787 | Rps17      | 12 |
| ENSMUSG00000002297 | Dbf4     | 20 | ENSMUSG00000008668 | Rps18      | 11 |
| ENSMUSG00000026385 | Dbi      | 12 | ENSMUSG00000083914 | Rps18-ps1  | 12 |
| ENSMUSG00000038057 | Dbil5    | 20 | ENSMUSG00000057657 | Rps18-ps3  | 11 |
| ENSMUSG00000034675 | Dbn1     | 18 | ENSMUSG00000040952 | Rps19      | 12 |
| ENSMUSG00000031970 | Dbndd1   | 18 | ENSMUSG00000080059 | Rps19-ps3  | 20 |
| ENSMUSG00000017734 | Dbndd2   | 20 | ENSMUSG00000096942 | Rps19-ps6  | 3  |
| ENSMUSG00000020476 | Dbnl     | 20 | ENSMUSG00000051518 | Rps19bp1   | 9  |
| ENSMUSG00000059824 | Dbp      | 1  | ENSMUSG00000044533 | Rps2       | 20 |
| ENSMUSG00000029878 | Dbpht2   | 9  | ENSMUSG00000081684 | Rps2-ps13  | 10 |
| ENSMUSG00000032469 | Dbr1     | 20 | ENSMUSG00000028234 | Rps20      | 12 |
| ENSMUSG00000000340 | Dbt      | 20 | ENSMUSG00000039001 | Rps21      | 12 |
| ENSMUSG00000045608 | Dbx2     | 20 | ENSMUSG00000049517 | Rps23      | 12 |
| ENSMUSG00000040325 | Dcaf1    | 9  | ENSMUSG00000100755 | Rps23-ps1  | 12 |
| ENSMUSG00000035572 | Dcaf10   | 9  | ENSMUSG00000066902 | Rps23-ps2  | 12 |
| ENSMUSG00000022214 | Dcaf11   | 20 | ENSMUSG00000025290 | Rps24      | 3  |
| ENSMUSG00000028436 | Dcaf12   | 20 | ENSMUSG00000069125 | Rps24-ps2  | 20 |
| ENSMUSG00000045284 | Dcaf12l1 | 9  | ENSMUSG00000081049 | Rps24-ps3  | 19 |
| ENSMUSG00000050926 | Dcaf12l2 | 20 | ENSMUSG00000009927 | Rps25      | 12 |
| ENSMUSG00000022300 | Dcaf13   | 20 | ENSMUSG00000067344 | Rps25-ps1  | 12 |
| ENSMUSG00000037103 | Dcaf15   | 3  | ENSMUSG00000025362 | Rps26      | 12 |
| ENSMUSG00000041966 | Dcaf17   | 20 | ENSMUSG00000059775 | Rps26-ps1  | 10 |
| ENSMUSG00000021222 | Dcaf4    | 12 | ENSMUSG00000090733 | Rps27      | 3  |
| ENSMUSG00000049106 | Dcaf5    | 1  | ENSMUSG00000020460 | Rps27a     | 12 |
| ENSMUSG00000026571 | Dcaf6    | 9  | ENSMUSG00000101501 | Rps27a-ps1 | 20 |
| ENSMUSG00000049354 | Dcaf7    | 20 | ENSMUSG00000058838 | Rps27a-ps2 | 20 |
| ENSMUSG00000026554 | Dcaf8    | 20 | ENSMUSG00000036781 | Rps27l     | 1  |
| ENSMUSG00000020935 | Dcakd    | 20 | ENSMUSG00000050621 | Rps27rt    | 12 |
| ENSMUSG00000019891 | Dcbld1   | 20 | ENSMUSG00000067288 | Rps28      | 11 |
| ENSMUSG00000035107 | Dcbld2   | 9  | ENSMUSG00000034892 | Rps29      | 10 |
| ENSMUSG00000060534 | Dcc      | 9  | ENSMUSG00000030744 | Rps3       | 12 |
| ENSMUSG00000035910 | Dcdc2a   | 20 | ENSMUSG00000028081 | Rps3a1     | 20 |
| ENSMUSG00000078552 | Dcdc2b   | 1  | ENSMUSG00000062611 | Rps3a2     | 20 |
| ENSMUSG00000074981 | Dcdc5    | 9  | ENSMUSG00000059751 | Rps3a3     | 18 |
| ENSMUSG00000036862 | Dchs1    | 1  | ENSMUSG00000063171 | Rps4l      | 20 |

|                    |         |    |                    |           |    |
|--------------------|---------|----|--------------------|-----------|----|
| ENSMUSG00000102692 | Dchs2   | 18 | ENSMUSG00000031320 | Rps4x     | 3  |
| ENSMUSG00000029366 | Dck     | 1  | ENSMUSG00000104699 | Rps4x-ps  | 20 |
| ENSMUSG00000027797 | Dclk1   | 9  | ENSMUSG00000012848 | Rps5      | 3  |
| ENSMUSG00000028078 | Dclk2   | 20 | ENSMUSG00000028495 | Rps6      | 3  |
| ENSMUSG00000032500 | Dclk3   | 9  | ENSMUSG00000063875 | Rps6-ps1  | 20 |
| ENSMUSG00000025077 | Dclre1a | 9  | ENSMUSG00000082465 | Rps6-ps3  | 20 |
| ENSMUSG00000027845 | Dclre1b | 20 | ENSMUSG00000081406 | Rps6-ps4  | 2  |
| ENSMUSG00000026648 | Dclre1c | 4  | ENSMUSG00000003644 | Rps6ka1   | 16 |
| ENSMUSG00000019929 | Dcn     | 1  | ENSMUSG00000023809 | Rps6ka2   | 9  |
| ENSMUSG00000021962 | Dcp1a   | 20 | ENSMUSG00000031309 | Rps6ka3   | 6  |
| ENSMUSG00000041477 | Dcp1b   | 9  | ENSMUSG00000024952 | Rps6ka4   | 9  |
| ENSMUSG00000024472 | Dcp2    | 9  | ENSMUSG00000021180 | Rps6ka5   | 19 |
| ENSMUSG00000032040 | Dcps    | 20 | ENSMUSG00000020516 | Rps6kb1   | 10 |
| ENSMUSG00000042672 | Dcst1   | 20 | ENSMUSG00000089872 | Rps6kc1   | 20 |
| ENSMUSG00000109293 | Dcst2   | 20 | ENSMUSG00000019235 | Rps6kl1   | 2  |
| ENSMUSG00000022129 | Dct     | 20 | ENSMUSG00000061477 | Rps7      | 12 |
| ENSMUSG00000031562 | Dctd    | 12 | ENSMUSG00000047675 | Rps8      | 20 |
| ENSMUSG00000031865 | Dctn1   | 12 | ENSMUSG00000071303 | Rps8-ps1  | 20 |
| ENSMUSG00000025410 | Dctn2   | 9  | ENSMUSG00000083481 | Rps8-ps2  | 20 |
| ENSMUSG00000028447 | Dctn3   | 12 | ENSMUSG00000074547 | Rps8-ps4  | 12 |
| ENSMUSG00000024603 | Dctn4   | 20 | ENSMUSG00000006333 | Rps9      | 12 |
| ENSMUSG00000030868 | Dctn5   | 12 | ENSMUSG00000032518 | Rpsa      | 3  |
| ENSMUSG00000031516 | Dctn6   | 20 | ENSMUSG00000047676 | Rpsa-ps10 | 10 |
| ENSMUSG00000042462 | Dctpp1  | 3  | ENSMUSG00000082978 | Rpsa-ps11 | 1  |
| ENSMUSG00000027708 | Dcun1d1 | 12 | ENSMUSG00000045055 | Rpsa-ps2  | 1  |
| ENSMUSG00000038506 | Dcun1d2 | 9  | ENSMUSG00000117438 | Rpsa-ps7  | 2  |
| ENSMUSG00000048787 | Dcun1d3 | 3  | ENSMUSG00000082895 | Rpsa-ps9  | 12 |
| ENSMUSG00000051674 | Dcun1d4 | 20 | ENSMUSG00000025583 | Rptor     | 2  |
| ENSMUSG00000032002 | Dcun1d5 | 20 | ENSMUSG00000041199 | Rpusd1    | 3  |
| ENSMUSG00000031285 | Dcx     | 16 | ENSMUSG00000027324 | Rpusd2    | 13 |
| ENSMUSG00000039450 | Dcxr    | 20 | ENSMUSG00000051169 | Rpusd3    | 20 |
| ENSMUSG00000074247 | Dda1    | 20 | ENSMUSG00000032044 | Rpusd4    | 20 |
| ENSMUSG00000028194 | Ddah1   | 18 | ENSMUSG00000031880 | Rrad      | 20 |
| ENSMUSG00000007039 | Ddah2   | 20 | ENSMUSG00000070934 | Rraga     | 20 |
| ENSMUSG00000024740 | Ddb1    | 20 | ENSMUSG00000041658 | Rragb     | 18 |
| ENSMUSG00000002109 | Ddb2    | 20 | ENSMUSG00000028646 | Rragc     | 20 |
| ENSMUSG00000020182 | Ddc     | 9  | ENSMUSG00000028278 | Rragd     | 9  |
| ENSMUSG00000037697 | Ddhd1   | 19 | ENSMUSG00000038387 | Rras      | 9  |
| ENSMUSG00000061313 | Ddhd2   | 20 | ENSMUSG00000055723 | Rras2     | 5  |
| ENSMUSG00000078515 | Ddi2    | 20 | ENSMUSG00000027422 | Rrbp1     | 9  |
| ENSMUSG00000030641 | Ddias   | 20 | ENSMUSG00000039087 | Rreb1     | 20 |
| ENSMUSG00000025408 | Ddit3   | 3  | ENSMUSG00000028012 | Rrh       | 13 |
| ENSMUSG00000020108 | Ddit4   | 20 | ENSMUSG00000030978 | Rrm1      | 20 |
| ENSMUSG00000046818 | Ddit4l  | 1  | ENSMUSG00000020649 | Rrm2      | 20 |
| ENSMUSG00000059213 | Ddn     | 9  | ENSMUSG00000022292 | Rrm2b     | 16 |
| ENSMUSG00000063428 | Ddo     | 6  | ENSMUSG00000022682 | Rrn3      | 20 |
| ENSMUSG00000028757 | Ddost   | 19 | ENSMUSG00000004896 | Rrnad1    | 20 |
| ENSMUSG00000003534 | Ddr1    | 15 | ENSMUSG00000061032 | Rrp1      | 12 |
| ENSMUSG00000026674 | Ddr2    | 20 | ENSMUSG00000035049 | Rrp12     | 1  |
| ENSMUSG00000068290 | Ddrgk1  | 3  | ENSMUSG00000001305 | Rrp15     | 20 |
| ENSMUSG00000001666 | Ddt     | 12 | ENSMUSG00000058392 | Rrp1b     | 20 |
| ENSMUSG00000037149 | Ddx1    | 20 | ENSMUSG00000023971 | Rrp36     | 20 |
| ENSMUSG00000053289 | Ddx10   | 20 | ENSMUSG00000018040 | Rrp7a     | 20 |
| ENSMUSG00000035842 | Ddx11   | 1  | ENSMUSG00000030888 | Rrp8      | 20 |
| ENSMUSG00000055065 | Ddx17   | 20 | ENSMUSG00000041506 | Rrp9      | 20 |

|                    |         |    |                     |          |    |
|--------------------|---------|----|---------------------|----------|----|
| ENSMUSG0000001674  | Ddx18   | 20 | ENSMUSG00000061024  | Rrs1     | 20 |
| ENSMUSG00000015023 | Ddx19a  | 20 | ENSMUSG00000031293  | Rs1      | 20 |
| ENSMUSG00000033658 | Ddx19b  | 2  | ENSMUSG00000039096  | Rsad1    | 20 |
| ENSMUSG00000027905 | Ddx20   | 12 | ENSMUSG00000020641  | Rsad2    | 20 |
| ENSMUSG00000020075 | Ddx21   | 1  | ENSMUSG00000044098  | Rsb1     | 2  |
| ENSMUSG0000003360  | Ddx23   | 20 | ENSMUSG00000039968  | Rsb1l    | 12 |
| ENSMUSG00000041645 | Ddx24   | 20 | ENSMUSG00000035623  | Rsf1     | 20 |
| ENSMUSG00000032101 | Ddx25   | 18 | ENSMUSG00000037593  | Rskr     | 19 |
| ENSMUSG00000017999 | Ddx27   | 20 | ENSMUSG00000058900  | Rsl1     | 20 |
| ENSMUSG00000045538 | Ddx28   | 20 | ENSMUSG00000005846  | Rsl1d1   | 20 |
| ENSMUSG00000026806 | Ddx31   | 20 | ENSMUSG00000032215  | Rsl24d1  | 20 |
| ENSMUSG00000005481 | Ddx39   | 20 | ENSMUSG00000074824  | Rslcan18 | 9  |
| ENSMUSG00000019432 | Ddx39b  | 20 | ENSMUSG00000024033  | Rsph1    | 14 |
| ENSMUSG00000000787 | Ddx3x   | 20 | ENSMUSG00000075569  | Rsph10b  | 14 |
| ENSMUSG00000069045 | Ddx3y   | 19 | ENSMUSG00000009070  | Rsph14   | 20 |
| ENSMUSG00000021758 | Ddx4    | 20 | ENSMUSG00000073471  | Rsph3a   | 18 |
| ENSMUSG00000021494 | Ddx41   | 20 | ENSMUSG00000023806  | Rsph3b   | 20 |
| ENSMUSG00000020705 | Ddx42   | 20 | ENSMUSG00000039552  | Rsph4a   | 14 |
| ENSMUSG00000070291 | Ddx43   | 20 | ENSMUSG00000023966  | Rsph9    | 13 |
| ENSMUSG00000021500 | Ddx46   | 2  | ENSMUSG00000028871  | Rspo1    | 20 |
| ENSMUSG00000030204 | Ddx47   | 20 | ENSMUSG000000051920 | Rspo2    | 20 |
| ENSMUSG00000057788 | Ddx49   | 12 | ENSMUSG00000019880  | Rspo3    | 20 |
| ENSMUSG00000020719 | Ddx5    | 18 | ENSMUSG00000032852  | Rspo4    | 20 |
| ENSMUSG00000020076 | Ddx50   | 20 | ENSMUSG00000050079  | Rspr1    | 20 |
| ENSMUSG00000029504 | Ddx51   | 20 | ENSMUSG00000034544  | Rsrc1    | 18 |
| ENSMUSG00000020677 | Ddx52   | 20 | ENSMUSG00000029422  | Rsrc2    | 20 |
| ENSMUSG00000029599 | Ddx54   | 20 | ENSMUSG00000037266  | Rsrp1    | 20 |
| ENSMUSG00000029389 | Ddx55   | 9  | ENSMUSG00000026727  | Rsu1     | 20 |
| ENSMUSG00000004393 | Ddx56   | 20 | ENSMUSG00000048617  | Rtbdn    | 6  |
| ENSMUSG00000040296 | Ddx58   | 2  | ENSMUSG00000000339  | Rtca     | 20 |
| ENSMUSG00000026404 | Ddx59   | 1  | ENSMUSG00000001783  | Rtcb     | 20 |
| ENSMUSG00000032097 | Ddx6    | 7  | ENSMUSG00000038685  | Rtel1    | 20 |
| ENSMUSG00000037921 | Ddx60   | 20 | ENSMUSG00000027304  | Rtf1     | 20 |
| ENSMUSG00000058886 | Deaf1   | 19 | ENSMUSG00000027502  | Rtf2     | 20 |
| ENSMUSG00000028223 | Decr1   | 20 | ENSMUSG00000034930  | Rtkn     | 3  |
| ENSMUSG00000036775 | Decr2   | 17 | ENSMUSG00000037846  | Rtkn2    | 20 |
| ENSMUSG00000013973 | Dedd    | 20 | ENSMUSG00000086965  | Rtl10    | 20 |
| ENSMUSG00000054499 | Dedd2   | 20 | ENSMUSG00000071679  | Rtl4     | 20 |
| ENSMUSG00000002257 | Def6    | 9  | ENSMUSG00000049191  | Rtl5     | 5  |
| ENSMUSG00000001482 | Def8    | 20 | ENSMUSG00000055745  | Rtl6     | 20 |
| ENSMUSG00000038633 | Degs1   | 20 | ENSMUSG00000085584  | Rtl9     | 9  |
| ENSMUSG00000021263 | Degs2   | 20 | ENSMUSG00000021087  | Rtn1     | 18 |
| ENSMUSG00000021377 | Dek     | 9  | ENSMUSG00000030401  | Rtn2     | 20 |
| ENSMUSG00000024442 | Dele1   | 20 | ENSMUSG00000024758  | Rtn3     | 1  |
| ENSMUSG00000035392 | Dennd1a | 20 | ENSMUSG00000020458  | Rtn4     | 10 |
| ENSMUSG00000056268 | Dennd1b | 12 | ENSMUSG00000019864  | Rtn4ip1  | 20 |
| ENSMUSG00000002668 | Dennd1c | 20 | ENSMUSG00000045287  | Rtn4rl1  | 19 |
| ENSMUSG00000038456 | Dennd2a | 20 | ENSMUSG00000050896  | Rtn4rl2  | 5  |
| ENSMUSG00000007379 | Dennd2c | 20 | ENSMUSG00000033355  | Rtp4     | 20 |
| ENSMUSG00000027901 | Dennd2d | 20 | ENSMUSG00000021807  | Rtraf    | 20 |
| ENSMUSG00000036661 | Dennd3  | 20 | ENSMUSG00000074479  | Rtraf-ps | 20 |
| ENSMUSG00000053641 | Dennd4a | 12 | ENSMUSG00000023066  | Rttn     | 18 |
| ENSMUSG00000042404 | Dennd4b | 20 | ENSMUSG00000035629  | Rubcn    | 1  |
| ENSMUSG00000038024 | Dennd4c | 20 | ENSMUSG00000034959  | Rubcnl   | 13 |
| ENSMUSG00000035901 | Dennd5a | 18 | ENSMUSG00000020375  | Rufy1    | 20 |



|                    |          |    |                    |          |    |
|--------------------|----------|----|--------------------|----------|----|
| ENSMUSG00000030313 | Dennd5b  | 12 | ENSMUSG00000020070 | Rufy2    | 1  |
| ENSMUSG00000040818 | Dennd6a  | 20 | ENSMUSG00000029291 | Rufy3    | 1  |
| ENSMUSG00000015377 | Dennd6b  | 20 | ENSMUSG00000035007 | Rundc1   | 9  |
| ENSMUSG00000023106 | Denr     | 20 | ENSMUSG00000006575 | Rundc3a  | 2  |
| ENSMUSG00000021697 | Depdc1b  | 20 | ENSMUSG00000040570 | Rundc3b  | 20 |
| ENSMUSG00000037426 | Depdc5   | 18 | ENSMUSG00000022952 | Runx1    | 20 |
| ENSMUSG00000027173 | Depdc7   | 20 | ENSMUSG00000006586 | Runx1t1  | 9  |
| ENSMUSG00000048489 | Depp1    | 1  | ENSMUSG00000039153 | Runx2    | 2  |
| ENSMUSG00000022419 | Deptor   | 18 | ENSMUSG00000073394 | Runx2os1 | 20 |
| ENSMUSG00000030225 | Dera     | 20 | ENSMUSG00000041263 | Rusc1    | 18 |
| ENSMUSG00000022365 | Derl1    | 20 | ENSMUSG00000035969 | Rusc2    | 18 |
| ENSMUSG00000018442 | Derl2    | 20 | ENSMUSG00000030079 | Ruvbl1   | 20 |
| ENSMUSG00000009092 | Derl3    | 3  | ENSMUSG00000003868 | Ruvbl2   | 20 |
| ENSMUSG00000026208 | Des      | 20 | ENSMUSG00000019782 | Rwdd1    | 12 |
| ENSMUSG00000022472 | Desi1    | 16 | ENSMUSG00000032417 | Rwdd2a   | 6  |
| ENSMUSG00000030610 | Det1     | 20 | ENSMUSG00000041079 | Rwdd2b   | 20 |
| ENSMUSG00000039977 | Deup1    | 20 | ENSMUSG00000028133 | Rwdd3    | 20 |
| ENSMUSG00000038055 | Dexi     | 15 | ENSMUSG00000031568 | Rwdd4a   | 20 |
| ENSMUSG00000028974 | Dffa     | 12 | ENSMUSG00000034009 | Rxfp1    | 9  |
| ENSMUSG00000029027 | Dffb     | 20 | ENSMUSG00000053368 | Rxfp2    | 20 |
| ENSMUSG00000022555 | Dgat1    | 20 | ENSMUSG00000060735 | Rxfp3    | 20 |
| ENSMUSG00000030747 | Dgat2    | 9  | ENSMUSG00000015846 | Rxra     | 20 |
| ENSMUSG00000067597 | Dgat2l6  | 2  | ENSMUSG00000039656 | Rxrb     | 20 |
| ENSMUSG00000003166 | Dgcr2    | 20 | ENSMUSG00000015843 | Rxrg     | 9  |
| ENSMUSG00000025357 | Dgka     | 7  | ENSMUSG00000034620 | Rxylt1   | 20 |
| ENSMUSG00000036095 | Dgkb     | 9  | ENSMUSG00000072872 | Rybp     | 7  |
| ENSMUSG00000070738 | Dgkd     | 4  | ENSMUSG00000055763 | Rybp-ps  | 20 |
| ENSMUSG00000000276 | Dgke     | 1  | ENSMUSG00000032547 | Ryk      | 20 |
| ENSMUSG00000022861 | Dgkg     | 5  | ENSMUSG00000030592 | Ryr1     | 9  |
| ENSMUSG00000034731 | Dgkh     | 7  | ENSMUSG00000021313 | Ryr2     | 9  |
| ENSMUSG00000038665 | Dgki     | 7  | ENSMUSG00000057378 | Ryr3     | 9  |
| ENSMUSG00000004815 | Dgkq     | 19 | ENSMUSG00000044080 | S100a1   | 12 |
| ENSMUSG00000040479 | Dgkz     | 5  | ENSMUSG00000041959 | S100a10  | 2  |
| ENSMUSG00000021185 | Dglucy   | 1  | ENSMUSG00000027907 | S100a11  | 2  |
| ENSMUSG00000014554 | Dguok    | 20 | ENSMUSG00000042312 | S100a13  | 12 |
| ENSMUSG00000034926 | Dhcr24   | 20 | ENSMUSG00000074457 | S100a16  | 12 |
| ENSMUSG00000058454 | Dhcr7    | 9  | ENSMUSG00000001021 | S100a3   | 20 |
| ENSMUSG00000012117 | Dhdds    | 9  | ENSMUSG00000001025 | S100a6   | 19 |
| ENSMUSG00000011382 | Dhdh     | 20 | ENSMUSG00000033208 | S100b    | 5  |
| ENSMUSG00000021707 | Dhfr     | 9  | ENSMUSG00000040928 | S100pbp  | 9  |
| ENSMUSG00000031730 | Dhodh    | 20 | ENSMUSG00000045092 | S1pr1    | 9  |
| ENSMUSG00000060038 | Dhps     | 20 | ENSMUSG00000043895 | S1pr2    | 20 |
| ENSMUSG00000002332 | Dhrs1    | 20 | ENSMUSG00000067586 | S1pr3    | 20 |
| ENSMUSG00000034449 | Dhrs11   | 20 | ENSMUSG00000045087 | S1pr5    | 16 |
| ENSMUSG00000020834 | Dhrs13   | 20 | ENSMUSG00000006763 | Saal1    | 3  |
| ENSMUSG00000087050 | Dhrs13os | 20 | ENSMUSG00000024790 | Sac3d1   | 20 |
| ENSMUSG00000066026 | Dhrs3    | 1  | ENSMUSG00000025240 | Sacm1l   | 3  |
| ENSMUSG00000022210 | Dhrs4    | 20 | ENSMUSG00000048279 | Sacs     | 12 |
| ENSMUSG00000021094 | Dhrs7    | 20 | ENSMUSG00000052833 | Sae1     | 20 |
| ENSMUSG00000042569 | Dhrs7b   | 20 | ENSMUSG00000071054 | Safb     | 9  |
| ENSMUSG00000025815 | Dhtkd1   | 5  | ENSMUSG00000042625 | Safb2    | 20 |
| ENSMUSG00000029169 | Dhx15    | 20 | ENSMUSG00000056055 | Sag      | 20 |
| ENSMUSG00000024422 | Dhx16    | 20 | ENSMUSG00000031665 | Sall1    | 9  |
| ENSMUSG00000042426 | Dhx29    | 5  | ENSMUSG00000049532 | Sall2    | 9  |
| ENSMUSG00000032480 | Dhx30    | 20 | ENSMUSG00000024565 | Sall3    | 9  |

|                    |        |    |                     |           |    |
|--------------------|--------|----|---------------------|-----------|----|
| ENSMUSG00000030986 | Dhx32  | 1  | ENSMUSG00000027547  | Sall4     | 20 |
| ENSMUSG00000040620 | Dhx33  | 5  | ENSMUSG00000079003  | Samd1     | 20 |
| ENSMUSG00000006019 | Dhx34  | 20 | ENSMUSG00000038605  | Samd10    | 18 |
| ENSMUSG00000027655 | Dhx35  | 9  | ENSMUSG000000096351 | Samd11    | 20 |
| ENSMUSG00000027770 | Dhx36  | 20 | ENSMUSG00000058656  | Samd12    | 9  |
| ENSMUSG00000029480 | Dhx37  | 20 | ENSMUSG00000047181  | Samd14    | 9  |
| ENSMUSG00000037993 | Dhx38  | 20 | ENSMUSG00000090812  | Samd15    | 9  |
| ENSMUSG00000018425 | Dhx40  | 7  | ENSMUSG00000021838  | Samd4     | 18 |
| ENSMUSG00000035051 | Dhx57  | 4  | ENSMUSG00000109336  | Samd4b    | 20 |
| ENSMUSG00000017830 | Dhx58  | 11 | ENSMUSG00000060487  | Samd5     | 18 |
| ENSMUSG00000034931 | Dhx8   | 20 | ENSMUSG00000021770  | Samd8     | 20 |
| ENSMUSG00000042699 | Dhx9   | 20 | ENSMUSG00000047735  | Samd9l    | 20 |
| ENSMUSG00000029433 | Diablo | 20 | ENSMUSG00000027639  | Samhd1    | 19 |
| ENSMUSG00000024456 | Diaph1 | 9  | ENSMUSG00000022437  | Samm50    | 20 |
| ENSMUSG00000034480 | Diaph2 | 9  | ENSMUSG00000022876  | Samsn1    | 20 |
| ENSMUSG00000022021 | Diaph3 | 1  | ENSMUSG00000024260  | Sap130    | 12 |
| ENSMUSG00000041415 | Dicer1 | 3  | ENSMUSG00000021963  | Sap18     | 20 |
| ENSMUSG00000038914 | Dido1  | 20 | ENSMUSG00000061104  | Sap18b    | 12 |
| ENSMUSG00000021692 | Dimt1  | 20 | ENSMUSG00000031609  | Sap30     | 12 |
| ENSMUSG00000007682 | Dio2   | 20 | ENSMUSG00000020755  | Sap30bp   | 20 |
| ENSMUSG00000020231 | Dip2a  | 18 | ENSMUSG00000087064  | Sap30bpos | 20 |
| ENSMUSG00000023026 | Dip2b  | 20 | ENSMUSG00000020519  | Sap30l    | 20 |
| ENSMUSG00000048264 | Dip2c  | 20 | ENSMUSG00000026955  | Sapcd2    | 20 |
| ENSMUSG00000029270 | Dipk1a | 20 | ENSMUSG00000020088  | Sar1a     | 20 |
| ENSMUSG00000036186 | Dipk1b | 7  | ENSMUSG00000020386  | Sar1b     | 19 |
| ENSMUSG00000047992 | Dipk1c | 20 | ENSMUSG00000031532  | Saraf     | 20 |
| ENSMUSG00000045414 | Dipk2a | 20 | ENSMUSG00000009614  | Sardh     | 20 |
| ENSMUSG00000037358 | Dipk2b | 20 | ENSMUSG00000050132  | Sarm1     | 3  |
| ENSMUSG00000043670 | Diras1 | 18 | ENSMUSG00000078427  | Sarnp     | 20 |
| ENSMUSG00000047842 | Diras2 | 9  | ENSMUSG00000068739  | Sars      | 7  |
| ENSMUSG00000033166 | Dis3   | 1  | ENSMUSG00000070699  | Sars2     | 20 |
| ENSMUSG00000032396 | Dis3l  | 20 | ENSMUSG00000039148  | Sart1     | 20 |
| ENSMUSG00000053333 | Dis3l2 | 7  | ENSMUSG00000018974  | Sart3     | 20 |
| ENSMUSG00000043051 | Disc1  | 1  | ENSMUSG00000015305  | Sash1     | 18 |
| ENSMUSG00000030768 | Disp1  | 20 | ENSMUSG00000031101  | Sash3     | 20 |
| ENSMUSG00000040035 | Disp2  | 18 | ENSMUSG00000027959  | Sass6     | 20 |
| ENSMUSG00000041544 | Disp3  | 19 | ENSMUSG00000025283  | Sat1      | 20 |
| ENSMUSG00000032064 | Dixdc1 | 20 | ENSMUSG00000069835  | Sat2      | 20 |
| ENSMUSG00000031403 | Dkc1   | 20 | ENSMUSG00000023927  | Satb1     | 3  |
| ENSMUSG00000028031 | Dkk2   | 20 | ENSMUSG00000038331  | Satb2     | 20 |
| ENSMUSG00000030772 | Dkk3   | 5  | ENSMUSG00000021067  | Sav1      | 1  |
| ENSMUSG00000030792 | Dkkl1  | 20 | ENSMUSG00000038570  | Saxo2     | 18 |
| ENSMUSG00000000168 | Dlat   | 20 | ENSMUSG00000045107  | Saysd1    | 20 |
| ENSMUSG00000031523 | Dlc1   | 18 | ENSMUSG00000025337  | Sbds      | 2  |
| ENSMUSG00000020664 | Dld    | 20 | ENSMUSG00000036529  | Sbf1      | 1  |
| ENSMUSG00000038060 | Dlec1  | 14 | ENSMUSG00000038371  | Sbf2      | 20 |
| ENSMUSG00000097589 | Dleu2  | 1  | ENSMUSG00000042978  | Sbk1      | 9  |
| ENSMUSG00000048281 | Dleu7  | 9  | ENSMUSG00000085272  | Sbk3      | 20 |
| ENSMUSG00000022770 | Dlg1   | 6  | ENSMUSG00000038095  | Sbno1     | 20 |
| ENSMUSG00000052572 | Dlg2   | 9  | ENSMUSG00000035673  | Sbno2     | 20 |
| ENSMUSG00000000881 | Dlg3   | 4  | ENSMUSG00000046056  | Sbsn      | 3  |
| ENSMUSG00000020886 | Dlg4   | 9  | ENSMUSG00000032719  | Sbspon    | 18 |
| ENSMUSG00000021782 | Dlg5   | 19 | ENSMUSG00000032018  | Sc5d      | 3  |
| ENSMUSG00000003279 | Dlgap1 | 5  | ENSMUSG00000038406  | Scaf1     | 20 |
| ENSMUSG00000047495 | Dlgap2 | 9  | ENSMUSG00000033228  | Scaf11    | 3  |

|                    |         |    |                    |          |    |
|--------------------|---------|----|--------------------|----------|----|
| ENSMUSG0000042388  | Dlgap3  | 9  | ENSMUSG00000022983 | Scaf4    | 20 |
| ENSMUSG0000061689  | Dlgap4  | 19 | ENSMUSG00000046201 | Scaf8    | 3  |
| ENSMUSG0000047428  | Dlk2    | 20 | ENSMUSG00000035236 | Scai     | 19 |
| ENSMUSG0000014773  | Dll1    | 20 | ENSMUSG00000021687 | Scamp1   | 9  |
| ENSMUSG0000003436  | Dll3    | 20 | ENSMUSG00000040188 | Scamp2   | 20 |
| ENSMUSG0000027314  | Dll4    | 20 | ENSMUSG00000028049 | Scamp3   | 20 |
| ENSMUSG00000004789 | Dlst    | 20 | ENSMUSG00000113949 | Scamp4   | 20 |
| ENSMUSG00000041911 | Dlx1    | 20 | ENSMUSG00000040722 | Scamp5   | 9  |
| ENSMUSG00000084946 | Dlx1as  | 20 | ENSMUSG00000046229 | Scand1   | 20 |
| ENSMUSG00000023391 | Dlx2    | 20 | ENSMUSG00000032485 | Scap     | 20 |
| ENSMUSG00000029755 | Dlx5    | 18 | ENSMUSG00000034007 | Scaper   | 16 |
| ENSMUSG00000029754 | Dlx6    | 9  | ENSMUSG00000034463 | Scara3   | 9  |
| ENSMUSG00000090063 | Dlx6os1 | 9  | ENSMUSG00000022032 | Scara5   | 13 |
| ENSMUSG00000094868 | Dlx6os2 | 20 | ENSMUSG00000037936 | Scarb1   | 18 |
| ENSMUSG00000028398 | Dmac1   | 20 | ENSMUSG00000029426 | Scarb2   | 18 |
| ENSMUSG00000057229 | Dmac2   | 20 | ENSMUSG00000038188 | Scarf1   | 20 |
| ENSMUSG00000054894 | Dmac2l  | 20 | ENSMUSG00000012017 | Scarf2   | 20 |
| ENSMUSG00000009640 | Dmap1   | 20 | ENSMUSG00000088789 | Scarna13 | 10 |
| ENSMUSG00000022429 | Dmc1    | 20 | ENSMUSG00000088689 | Scarna17 | 10 |
| ENSMUSG00000045103 | Dmd     | 1  | ENSMUSG00000088185 | Scarna2  | 20 |
| ENSMUSG00000060962 | Dmkn    | 19 | ENSMUSG00000089536 | Scarna3a | 10 |
| ENSMUSG00000029307 | Dmp1    | 20 | ENSMUSG00000089281 | Scarna6  | 10 |
| ENSMUSG00000030409 | Dmpk    | 3  | ENSMUSG00000088958 | Scarna8  | 10 |
| ENSMUSG00000042372 | Dmrt3   | 13 | ENSMUSG00000077506 | Scarna9  | 20 |
| ENSMUSG00000043753 | Dmrta1  | 9  | ENSMUSG00000038936 | Sccpdh   | 18 |
| ENSMUSG00000047143 | Dmrta2  | 1  | ENSMUSG00000037071 | Scd1     | 16 |
| ENSMUSG00000028610 | Dmrtb1  | 20 | ENSMUSG00000025203 | Scd2     | 16 |
| ENSMUSG00000031323 | Dmrta1a | 20 | ENSMUSG00000025202 | Scd3     | 20 |
| ENSMUSG00000042508 | Dmtf1   | 9  | ENSMUSG00000050195 | Scd4     | 20 |
| ENSMUSG00000022099 | Dmtn    | 9  | ENSMUSG00000022123 | Scel     | 20 |
| ENSMUSG00000030410 | Dmwd    | 20 | ENSMUSG00000020952 | Scfd1    | 1  |
| ENSMUSG00000037416 | Dmxl1   | 2  | ENSMUSG00000062110 | Scfd2    | 20 |
| ENSMUSG00000041268 | Dmxl2   | 2  | ENSMUSG00000050711 | Scg2     | 20 |
| ENSMUSG00000036875 | Dna2    | 20 | ENSMUSG00000032181 | Scg3     | 20 |
| ENSMUSG00000031831 | Dnaaf1  | 20 | ENSMUSG00000023236 | Scg5     | 20 |
| ENSMUSG00000020973 | Dnaaf2  | 20 | ENSMUSG00000027777 | Schip1   | 5  |
| ENSMUSG00000055809 | Dnaaf3  | 13 | ENSMUSG00000059834 | Sclt1    | 20 |
| ENSMUSG00000092192 | Dnaaf4  | 20 | ENSMUSG00000026307 | Scly     | 20 |
| ENSMUSG00000025857 | Dnaaf5  | 20 | ENSMUSG00000000085 | Scmh1    | 9  |
| ENSMUSG00000019027 | Dnah1   | 1  | ENSMUSG00000000037 | Scml2    | 13 |
| ENSMUSG00000038011 | Dnah10  | 14 | ENSMUSG00000044770 | Scml4    | 9  |
| ENSMUSG00000018581 | Dnah11  | 14 | ENSMUSG00000064329 | Scn1a    | 18 |
| ENSMUSG00000047369 | Dnah14  | 20 | ENSMUSG00000019194 | Scn1b    | 18 |
| ENSMUSG00000033987 | Dnah17  | 20 | ENSMUSG00000075318 | Scn2a    | 7  |
| ENSMUSG00000005237 | Dnah2   | 14 | ENSMUSG00000070304 | Scn2b    | 8  |
| ENSMUSG00000052273 | Dnah3   | 14 | ENSMUSG00000057182 | Scn3a    | 7  |
| ENSMUSG00000022262 | Dnah5   | 14 | ENSMUSG00000049281 | Scn3b    | 18 |
| ENSMUSG00000052861 | Dnah6   | 20 | ENSMUSG00000046480 | Scn4b    | 9  |
| ENSMUSG00000096141 | Dnah7a  | 20 | ENSMUSG00000032511 | Scn5a    | 20 |
| ENSMUSG00000041144 | Dnah7b  | 9  | ENSMUSG00000034810 | Scn7a    | 9  |
| ENSMUSG00000101337 | Dnah7c  | 20 | ENSMUSG00000023033 | Scn8a    | 3  |
| ENSMUSG00000033826 | Dnah8   | 20 | ENSMUSG00000075316 | Scn9a    | 20 |
| ENSMUSG00000056752 | Dnah9   | 14 | ENSMUSG00000092607 | Scnm1    | 2  |
| ENSMUSG00000061322 | Dnaic1  | 20 | ENSMUSG00000030340 | Scnn1a   | 20 |
| ENSMUSG00000034706 | Dnaic2  | 1  | ENSMUSG00000069844 | Sco1     | 9  |

|                    |            |    |                    |          |    |
|--------------------|------------|----|--------------------|----------|----|
| ENSMUSG0000028410  | Dnaja1     | 20 | ENSMUSG00000091780 | Sco2     | 20 |
| ENSMUSG00000090197 | Dnaja1-ps  | 20 | ENSMUSG00000063253 | Scoc     | 20 |
| ENSMUSG00000031701 | Dnaja2     | 20 | ENSMUSG00000028603 | Scp2     | 12 |
| ENSMUSG00000004069 | Dnaja3     | 20 | ENSMUSG00000058492 | Scp2-ps2 | 11 |
| ENSMUSG00000032285 | Dnaja4     | 9  | ENSMUSG00000000278 | Scpep1   | 9  |
| ENSMUSG00000005483 | Dnajb1     | 20 | ENSMUSG00000031610 | Scrg1    | 12 |
| ENSMUSG00000004460 | Dnajb11    | 20 | ENSMUSG00000022568 | Scrib    | 16 |
| ENSMUSG00000020109 | Dnajb12    | 20 | ENSMUSG00000019124 | Scrn1    | 9  |
| ENSMUSG00000030708 | Dnajb13    | 20 | ENSMUSG00000020877 | Scrn2    | 12 |
| ENSMUSG00000074212 | Dnajb14    | 3  | ENSMUSG00000008226 | Scrn3    | 1  |
| ENSMUSG00000026203 | Dnajb2     | 2  | ENSMUSG00000048385 | Scrt1    | 18 |
| ENSMUSG00000081984 | Dnajb3     | 20 | ENSMUSG00000060257 | Scrt2    | 20 |
| ENSMUSG00000028035 | Dnajb4     | 20 | ENSMUSG00000026387 | Sctr     | 20 |
| ENSMUSG00000036052 | Dnajb5     | 18 | ENSMUSG00000016763 | Scube1   | 20 |
| ENSMUSG00000029131 | Dnajb6     | 20 | ENSMUSG00000007279 | Scube2   | 18 |
| ENSMUSG00000014905 | Dnajb9     | 12 | ENSMUSG00000038677 | Scube3   | 9  |
| ENSMUSG00000026740 | Dnajc1     | 6  | ENSMUSG00000034161 | Scx      | 13 |
| ENSMUSG00000027006 | Dnajc10    | 10 | ENSMUSG00000024941 | Scyl1    | 3  |
| ENSMUSG00000039768 | Dnajc11    | 20 | ENSMUSG00000069539 | Scyl2    | 3  |
| ENSMUSG00000036764 | Dnajc12    | 20 | ENSMUSG00000026584 | Scyl3    | 3  |
| ENSMUSG00000032560 | Dnajc13    | 20 | ENSMUSG00000029415 | Sdad1    | 20 |
| ENSMUSG00000025354 | Dnajc14    | 1  | ENSMUSG00000020592 | Sdc1     | 18 |
| ENSMUSG00000022013 | Dnajc15    | 9  | ENSMUSG00000022261 | Sdc2     | 20 |
| ENSMUSG00000040697 | Dnajc16    | 20 | ENSMUSG00000025743 | Sdc3     | 18 |
| ENSMUSG00000034278 | Dnajc17    | 20 | ENSMUSG00000017009 | Sdc4     | 20 |
| ENSMUSG00000024350 | Dnajc18    | 9  | ENSMUSG00000028249 | Sdcbp    | 9  |
| ENSMUSG00000027679 | Dnajc19    | 12 | ENSMUSG00000027456 | Sdcbp2   | 12 |
| ENSMUSG00000083854 | Dnajc19-ps | 20 | ENSMUSG00000026504 | Sdccag8  | 20 |
| ENSMUSG00000029014 | Dnajc2     | 3  | ENSMUSG00000038806 | Sde2     | 12 |
| ENSMUSG00000044224 | Dnajc21    | 19 | ENSMUSG00000002064 | Sdf2     | 20 |
| ENSMUSG00000027166 | Dnajc24    | 20 | ENSMUSG00000022769 | Sdf2l1   | 10 |
| ENSMUSG00000070972 | Dnajc25    | 18 | ENSMUSG00000029076 | Sdf4     | 20 |
| ENSMUSG00000020657 | Dnajc27    | 3  | ENSMUSG00000021577 | Sdha     | 9  |
| ENSMUSG00000039763 | Dnajc28    | 20 | ENSMUSG00000074211 | Sdhaf1   | 12 |
| ENSMUSG00000022136 | Dnajc3     | 20 | ENSMUSG00000024668 | Sdhaf2   | 20 |
| ENSMUSG00000061118 | Dnajc30    | 20 | ENSMUSG00000042505 | Sdhaf3   | 20 |
| ENSMUSG00000024963 | Dnajc4     | 20 | ENSMUSG00000026154 | Sdhaf4   | 12 |
| ENSMUSG00000000826 | Dnajc5     | 20 | ENSMUSG00000009863 | Sdhab    | 12 |
| ENSMUSG00000028528 | Dnajc6     | 19 | ENSMUSG00000058076 | Sdhc     | 20 |
| ENSMUSG00000014195 | Dnajc7     | 3  | ENSMUSG00000000171 | Sdhd     | 20 |
| ENSMUSG00000054405 | Dnajc8     | 1  | ENSMUSG00000039683 | Sdk1     | 20 |
| ENSMUSG00000021811 | Dnajc9     | 20 | ENSMUSG00000041592 | Sdk2     | 18 |
| ENSMUSG00000042523 | Dnal1      | 18 | ENSMUSG00000022223 | Sdr39u1  | 20 |
| ENSMUSG00000022420 | Dnal4      | 3  | ENSMUSG00000034308 | Sdr42e1  | 20 |
| ENSMUSG00000042707 | Dnali1     | 14 | ENSMUSG00000029596 | Sdsl     | 20 |
| ENSMUSG00000019088 | Dnase1l1   | 20 | ENSMUSG00000001103 | Sebox    | 20 |
| ENSMUSG00000024136 | Dnase1l2   | 1  | ENSMUSG00000040364 | Sec1     | 12 |
| ENSMUSG00000003812 | Dnase2a    | 20 | ENSMUSG00000025724 | Sec11a   | 1  |
| ENSMUSG00000044595 | Dnd1       | 20 | ENSMUSG00000024516 | Sec11c   | 7  |
| ENSMUSG00000036766 | Dner       | 18 | ENSMUSG00000030298 | Sec13    | 19 |
| ENSMUSG00000030882 | Dnhd1      | 20 | ENSMUSG00000020823 | Sec14l1  | 9  |
| ENSMUSG00000075467 | Dnlz       | 12 | ENSMUSG00000003585 | Sec14l2  | 1  |
| ENSMUSG00000026825 | Dnm1       | 19 | ENSMUSG00000054986 | Sec14l3  | 9  |
| ENSMUSG00000022789 | Dnm1l      | 3  | ENSMUSG00000019368 | Sec14l4  | 19 |
| ENSMUSG00000033335 | Dnm2       | 19 | ENSMUSG00000091712 | Sec14l5  | 16 |

|                   |         |    |                    |             |    |
|-------------------|---------|----|--------------------|-------------|----|
| ENSMUSG0000040265 | Dnm3    | 18 | ENSMUSG0000026924  | Sec16a      | 20 |
| ENSMUSG0000025195 | Dnmbp   | 1  | ENSMUSG0000026589  | Sec16b      | 20 |
| ENSMUSG0000004099 | Dnmt1   | 20 | ENSMUSG0000034473  | Sec22a      | 20 |
| ENSMUSG0000020661 | Dnmt3a  | 20 | ENSMUSG0000027879  | Sec22b      | 20 |
| ENSMUSG0000027478 | Dnmt3b  | 20 | ENSMUSG0000061536  | Sec22c      | 20 |
| ENSMUSG0000026209 | Dnpep   | 2  | ENSMUSG0000020986  | Sec23a      | 1  |
| ENSMUSG0000040658 | Dnph1   | 20 | ENSMUSG0000027429  | Sec23b      | 12 |
| ENSMUSG0000017299 | Dnttip1 | 10 | ENSMUSG0000055319  | Sec23ip     | 12 |
| ENSMUSG0000039756 | Dnttip2 | 20 | ENSMUSG0000036391  | Sec24a      | 19 |
| ENSMUSG0000052301 | Doc2a   | 20 | ENSMUSG0000001052  | Sec24b      | 20 |
| ENSMUSG0000020848 | Doc2b   | 6  | ENSMUSG0000039367  | Sec24c      | 20 |
| ENSMUSG0000024871 | Doc2g   | 2  | ENSMUSG0000039234  | Sec24d      | 5  |
| ENSMUSG0000058325 | Dock1   | 20 | ENSMUSG0000035325  | Sec31a      | 1  |
| ENSMUSG0000038608 | Dock10  | 9  | ENSMUSG0000051984  | Sec31b      | 18 |
| ENSMUSG0000031093 | Dock11  | 1  | ENSMUSG0000030082  | Sec61a1     | 20 |
| ENSMUSG0000020143 | Dock2   | 20 | ENSMUSG0000025816  | Sec61a2     | 1  |
| ENSMUSG0000039716 | Dock3   | 9  | ENSMUSG0000053317  | Sec61b      | 20 |
| ENSMUSG0000035954 | Dock4   | 9  | ENSMUSG0000078974  | Sec61g      | 12 |
| ENSMUSG0000044447 | Dock5   | 20 | ENSMUSG0000027706  | Sec62       | 6  |
| ENSMUSG0000032198 | Dock6   | 20 | ENSMUSG0000019802  | Sec63       | 20 |
| ENSMUSG0000028556 | Dock7   | 19 | ENSMUSG0000035139  | Secisbp2    | 20 |
| ENSMUSG0000052085 | Dock8   | 20 | ENSMUSG0000035093  | Secisbp2l   | 18 |
| ENSMUSG0000025558 | Dock9   | 9  | ENSMUSG0000079614  | Seh1l       | 20 |
| ENSMUSG0000078440 | Dohh    | 20 | ENSMUSG0000020964  | Sel1l       | 20 |
| ENSMUSG0000068335 | Dok1    | 20 | ENSMUSG0000029189  | Sel1l3      | 18 |
| ENSMUSG0000022102 | Dok2    | 18 | ENSMUSG0000068874  | Selenbp1    | 20 |
| ENSMUSG0000035711 | Dok3    | 1  | ENSMUSG0000037072  | Selenof     | 12 |
| ENSMUSG0000040631 | Dok4    | 20 | ENSMUSG0000076437  | Selenoh     | 20 |
| ENSMUSG0000027560 | Dok5    | 20 | ENSMUSG0000075703  | Selenoi     | 9  |
| ENSMUSG0000073514 | Dok6    | 1  | ENSMUSG0000042682  | Selenok     | 12 |
| ENSMUSG0000044716 | Dok7    | 9  | ENSMUSG0000085415  | Selenok-ps1 | 20 |
| ENSMUSG0000075419 | Dolk    | 19 | ENSMUSG00000113504 | Selenok-ps5 | 20 |
| ENSMUSG0000026856 | Dolpp1  | 9  | ENSMUSG00000113865 | Selenok-ps6 | 20 |
| ENSMUSG0000022960 | Donson  | 1  | ENSMUSG00000113014 | Selenok-ps8 | 20 |
| ENSMUSG0000034973 | Dop1a   | 2  | ENSMUSG0000075702  | Selenom     | 2  |
| ENSMUSG0000022946 | Dop1b   | 20 | ENSMUSG0000050989  | Selenon     | 9  |
| ENSMUSG0000061589 | Dot1l   | 20 | ENSMUSG0000035757  | Selenoo     | 18 |
| ENSMUSG0000032123 | Dpagt1  | 20 | ENSMUSG0000064373  | Selenop     | 4  |
| ENSMUSG0000030584 | Dpf1    | 9  | ENSMUSG0000075701  | Selenos     | 20 |
| ENSMUSG0000024826 | Dpf2    | 20 | ENSMUSG0000075700  | Selenot     | 20 |
| ENSMUSG0000021221 | Dpf3    | 5  | ENSMUSG0000046750  | Selenov     | 1  |
| ENSMUSG0000078789 | Dph1    | 9  | ENSMUSG0000041571  | Selenow     | 19 |
| ENSMUSG0000028540 | Dph2    | 20 | ENSMUSG0000048163  | Selplg      | 20 |
| ENSMUSG0000021905 | Dph3    | 20 | ENSMUSG0000042541  | Sem1        | 12 |
| ENSMUSG0000033554 | Dph5    | 20 | ENSMUSG0000028883  | Sema3a      | 19 |
| ENSMUSG0000057147 | Dph6    | 9  | ENSMUSG0000057969  | Sema3b      | 13 |
| ENSMUSG0000026975 | Dph7    | 20 | ENSMUSG0000028780  | Sema3c      | 7  |
| ENSMUSG0000078919 | Dpm1    | 20 | ENSMUSG0000040254  | Sema3d      | 9  |
| ENSMUSG0000026810 | Dpm2    | 12 | ENSMUSG0000063531  | Sema3e      | 6  |
| ENSMUSG0000042737 | Dpm3    | 12 | ENSMUSG0000034684  | Sema3f      | 20 |
| ENSMUSG0000036815 | Dpp10   | 9  | ENSMUSG0000021904  | Sema3g      | 20 |
| ENSMUSG0000063904 | Dpp3    | 9  | ENSMUSG0000028064  | Sema4a      | 1  |
| ENSMUSG0000035000 | Dpp4    | 18 | ENSMUSG0000030539  | Sema4b      | 20 |
| ENSMUSG0000061576 | Dpp6    | 13 | ENSMUSG0000026121  | Sema4c      | 20 |
| ENSMUSG0000026958 | Dpp7    | 20 | ENSMUSG0000021451  | Sema4d      | 1  |

|                    |         |    |                     |           |    |
|--------------------|---------|----|---------------------|-----------|----|
| ENSMUSG00000032393 | Dpp8    | 20 | ENSMUSG00000000627  | Sema4f    | 18 |
| ENSMUSG00000001229 | Dpp9    | 20 | ENSMUSG000000025207 | Sema4g    | 18 |
| ENSMUSG00000043067 | Dpy19l1 | 15 | ENSMUSG000000022231 | Sema5a    | 19 |
| ENSMUSG00000043671 | Dpy19l3 | 9  | ENSMUSG000000052133 | Sema5b    | 20 |
| ENSMUSG00000045205 | Dpy19l4 | 20 | ENSMUSG000000019647 | Sema6a    | 18 |
| ENSMUSG00000024067 | Dpy30   | 11 | ENSMUSG000000001227 | Sema6b    | 20 |
| ENSMUSG00000033308 | Dpyd    | 1  | ENSMUSG000000038777 | Sema6c    | 9  |
| ENSMUSG00000022304 | Dpys    | 20 | ENSMUSG000000027200 | Sema6d    | 18 |
| ENSMUSG00000022048 | Dpysl2  | 12 | ENSMUSG000000038264 | Sema7a    | 16 |
| ENSMUSG00000024501 | Dpysl3  | 9  | ENSMUSG000000033075 | Senp1     | 12 |
| ENSMUSG00000025478 | Dpysl4  | 18 | ENSMUSG000000022855 | Senp2     | 19 |
| ENSMUSG00000029168 | Dpysl5  | 9  | ENSMUSG000000005204 | Senp3     | 20 |
| ENSMUSG00000009145 | Dqx1    | 20 | ENSMUSG000000022772 | Senp5     | 19 |
| ENSMUSG00000029265 | Dr1     | 20 | ENSMUSG000000034252 | Senp6     | 2  |
| ENSMUSG00000020057 | Dram1   | 20 | ENSMUSG000000052917 | Senp7     | 2  |
| ENSMUSG00000027900 | Dram2   | 20 | ENSMUSG000000051705 | Senp8     | 20 |
| ENSMUSG00000024914 | Drap1   | 12 | ENSMUSG000000026662 | Sephs1    | 20 |
| ENSMUSG00000029005 | Draxin  | 20 | ENSMUSG000000049091 | Sephs2    | 20 |
| ENSMUSG00000073102 | Drc1    | 18 | ENSMUSG000000029173 | Sepsecs   | 20 |
| ENSMUSG00000056598 | Drc3    | 20 | ENSMUSG000000015659 | Serac1    | 20 |
| ENSMUSG00000031786 | Drc7    | 13 | ENSMUSG000000036371 | Serbp1    | 16 |
| ENSMUSG00000021478 | Drd1    | 9  | ENSMUSG000000021643 | Serf1     | 20 |
| ENSMUSG00000032259 | Drd2    | 9  | ENSMUSG000000074884 | Serf2     | 12 |
| ENSMUSG00000022705 | Drd3    | 20 | ENSMUSG000000030839 | Sergef    | 10 |
| ENSMUSG00000025496 | Drd4    | 20 | ENSMUSG000000058586 | Serhl     | 20 |
| ENSMUSG00000039358 | Drd5    | 5  | ENSMUSG000000019877 | Serinc1   | 3  |
| ENSMUSG00000020457 | Drg1    | 19 | ENSMUSG000000023232 | Serinc2   | 13 |
| ENSMUSG00000020537 | Drg2    | 20 | ENSMUSG000000017707 | Serinc3   | 20 |
| ENSMUSG00000022191 | Drosha  | 20 | ENSMUSG000000046110 | Serinc4   | 20 |
| ENSMUSG00000000223 | Drp2    | 1  | ENSMUSG000000021703 | Serinc5   | 20 |
| ENSMUSG00000059898 | Dsc3    | 20 | ENSMUSG000000027808 | Serp1     | 20 |
| ENSMUSG00000050272 | Dscam   | 19 | ENSMUSG000000052584 | Serp2     | 12 |
| ENSMUSG00000032087 | Dscaml1 | 1  | ENSMUSG000000021091 | Serpina3n | 20 |
| ENSMUSG00000022422 | Dscc1   | 20 | ENSMUSG000000058260 | Serpina9  | 19 |
| ENSMUSG00000039497 | Dse     | 20 | ENSMUSG000000044734 | Serpina1a | 16 |
| ENSMUSG00000038702 | Dsel    | 18 | ENSMUSG000000051029 | Serpina1b | 19 |
| ENSMUSG00000034774 | Dsg1c   | 20 | ENSMUSG000000060147 | Serpina6a | 20 |
| ENSMUSG00000044393 | Dsg2    | 8  | ENSMUSG000000042842 | Serpina6b | 20 |
| ENSMUSG00000027635 | Dsn1    | 20 | ENSMUSG000000026315 | Serpina8  | 5  |
| ENSMUSG00000054889 | Dsp     | 5  | ENSMUSG000000045827 | Serpina9  | 20 |
| ENSMUSG00000053268 | Dspp    | 20 | ENSMUSG000000022766 | Serpind1  | 2  |
| ENSMUSG00000026131 | Dst     | 18 | ENSMUSG000000037411 | Serpine1  | 20 |
| ENSMUSG00000015932 | Dstn    | 20 | ENSMUSG000000026249 | Serpine2  | 20 |
| ENSMUSG00000042046 | Dstyk   | 20 | ENSMUSG000000000753 | Serpina1  | 16 |
| ENSMUSG00000027430 | Dtd1    | 12 | ENSMUSG000000023224 | Serpina1  | 20 |
| ENSMUSG00000020956 | Dtd2    | 20 | ENSMUSG000000070436 | Serpina1  | 20 |
| ENSMUSG00000090326 | Dthd1   | 14 | ENSMUSG000000027834 | Serpina1  | 19 |
| ENSMUSG00000037474 | Dtl     | 16 | ENSMUSG000000008384 | Serpina1  | 20 |
| ENSMUSG00000024302 | Dtna    | 20 | ENSMUSG000000049800 | Serpina1  | 9  |
| ENSMUSG00000071454 | Dtnb    | 9  | ENSMUSG000000055200 | Serpina1  | 20 |
| ENSMUSG00000057531 | Dtnbp1  | 3  | ENSMUSG000000016262 | Serpina1  | 9  |
| ENSMUSG00000023330 | Dtwd1   | 20 | ENSMUSG000000056306 | Serpina1  | 5  |
| ENSMUSG00000024505 | Dtwd2   | 20 | ENSMUSG000000038332 | Serpina1  | 20 |
| ENSMUSG00000029603 | Dtx1    | 9  | ENSMUSG000000028893 | Serpina1  | 12 |
| ENSMUSG00000004947 | Dtx2    | 20 | ENSMUSG000000032009 | Serpina1  | 9  |

|                    |           |    |                    |          |    |
|--------------------|-----------|----|--------------------|----------|----|
| ENSMUSG0000040415  | Dtx3      | 19 | ENSMUSG0000042272  | Sestd1   | 19 |
| ENSMUSG0000049502  | Dtx3l     | 9  | ENSMUSG0000054766  | Set      | 20 |
| ENSMUSG0000039982  | Dtx4      | 9  | ENSMUSG0000024548  | Setbp1   | 1  |
| ENSMUSG0000026281  | Dtymk     | 20 | ENSMUSG0000042308  | Setd1a   | 20 |
| ENSMUSG0000022639  | Dubr      | 20 | ENSMUSG0000038384  | Setd1b   | 20 |
| ENSMUSG0000025155  | Dus1l     | 20 | ENSMUSG0000044791  | Setd2    | 7  |
| ENSMUSG0000031901  | Dus2      | 8  | ENSMUSG0000056770  | Setd3    | 20 |
| ENSMUSG0000007603  | Dus3l     | 20 | ENSMUSG0000022948  | Setd4    | 20 |
| ENSMUSG0000020648  | Dus4l     | 20 | ENSMUSG0000034269  | Setd5    | 12 |
| ENSMUSG0000024190  | Dusp1     | 16 | ENSMUSG0000031671  | Setd6    | 20 |
| ENSMUSG0000039384  | Dusp10    | 20 | ENSMUSG0000037111  | Setd7    | 3  |
| ENSMUSG0000030002  | Dusp11    | 20 | ENSMUSG0000015697  | Setdb1   | 20 |
| ENSMUSG0000026659  | Dusp12    | 20 | ENSMUSG00000071350 | Setdb2   | 20 |
| ENSMUSG0000018648  | Dusp14    | 9  | ENSMUSG0000034639  | Setmar   | 20 |
| ENSMUSG0000042662  | Dusp15    | 15 | ENSMUSG0000043535  | Setx     | 2  |
| ENSMUSG0000030203  | Dusp16    | 3  | ENSMUSG00000000632 | Sez6     | 9  |
| ENSMUSG0000047205  | Dusp18    | 9  | ENSMUSG0000058153  | Sez6l    | 19 |
| ENSMUSG0000027001  | Dusp19    | 9  | ENSMUSG0000030683  | Sez6l2   | 9  |
| ENSMUSG00000069255 | Dusp22    | 20 | ENSMUSG00000002129 | Sf3a1    | 20 |
| ENSMUSG0000026544  | Dusp23    | 20 | ENSMUSG0000020211  | Sf3a2    | 9  |
| ENSMUSG0000039661  | Dusp26    | 12 | ENSMUSG0000028902  | Sf3a3    | 20 |
| ENSMUSG0000026564  | Dusp27    | 18 | ENSMUSG0000025982  | Sf3b1    | 9  |
| ENSMUSG0000047067  | Dusp28    | 20 | ENSMUSG0000024853  | Sf3b2    | 20 |
| ENSMUSG0000003518  | Dusp3     | 20 | ENSMUSG0000033732  | Sf3b3    | 20 |
| ENSMUSG0000031530  | Dusp4     | 5  | ENSMUSG0000068856  | Sf3b4    | 20 |
| ENSMUSG0000034765  | Dusp5     | 20 | ENSMUSG0000078348  | Sf3b5    | 12 |
| ENSMUSG0000019960  | Dusp6     | 20 | ENSMUSG0000037361  | Sf3b6    | 12 |
| ENSMUSG0000053716  | Dusp7     | 20 | ENSMUSG0000023764  | Sfi1     | 20 |
| ENSMUSG0000037887  | Dusp8     | 20 | ENSMUSG0000006527  | Sfmbt1   | 20 |
| ENSMUSG0000027203  | Dut       | 20 | ENSMUSG00000061186 | Sfmbt2   | 1  |
| ENSMUSG0000029071  | Dvl1      | 20 | ENSMUSG0000047281  | Sfn      | 1  |
| ENSMUSG0000020888  | Dvl2      | 20 | ENSMUSG0000028820  | Sfpq     | 20 |
| ENSMUSG0000003233  | Dvl3      | 18 | ENSMUSG0000025066  | Sfr1     | 20 |
| ENSMUSG0000040482  | Dxo       | 20 | ENSMUSG0000031548  | Sfrp1    | 3  |
| ENSMUSG0000021791  | Dydc2     | 20 | ENSMUSG0000027996  | Sfrp2    | 20 |
| ENSMUSG0000035765  | Dym       | 7  | ENSMUSG0000021319  | Sfrp4    | 10 |
| ENSMUSG0000018707  | Dync1h1   | 3  | ENSMUSG0000018822  | Sfrp5    | 20 |
| ENSMUSG0000029757  | Dync1i1   | 19 | ENSMUSG0000029439  | Sfswap   | 20 |
| ENSMUSG0000027012  | Dync1i2   | 4  | ENSMUSG0000073468  | Sft2d1   | 20 |
| ENSMUSG0000032435  | Dync1li1  | 20 | ENSMUSG0000040848  | Sft2d2   | 19 |
| ENSMUSG0000035770  | Dync1li2  | 20 | ENSMUSG0000044982  | Sft2d3   | 20 |
| ENSMUSG0000047193  | Dync2h1   | 2  | ENSMUSG00000112343 | Sfta3-ps | 20 |
| ENSMUSG0000024253  | Dync2li1  | 20 | ENSMUSG0000021474  | Sfxn1    | 20 |
| ENSMUSG0000009013  | Dynll1    | 12 | ENSMUSG0000025036  | Sfxn2    | 20 |
| ENSMUSG0000020483  | Dynll2    | 18 | ENSMUSG0000025212  | Sfxn3    | 19 |
| ENSMUSG0000047459  | Dynlrb1   | 12 | ENSMUSG00000063698 | Sfxn4    | 20 |
| ENSMUSG0000034467  | Dynlrb2   | 14 | ENSMUSG0000033720  | Sfxn5    | 8  |
| ENSMUSG0000082691  | Dynt1-ps1 | 20 | ENSMUSG0000029156  | Sgcb     | 20 |
| ENSMUSG0000092074  | Dynt1a    | 20 | ENSMUSG0000020354  | Sgcd     | 20 |
| ENSMUSG0000000579  | Dynt1c    | 20 | ENSMUSG0000004631  | Sgce     | 20 |
| ENSMUSG0000031176  | Dynt3     | 20 | ENSMUSG0000039539  | Sgcz     | 17 |
| ENSMUSG0000022897  | Dyrk1a    | 3  | ENSMUSG0000030714  | Sgf29    | 20 |
| ENSMUSG0000002409  | Dyrk1b    | 1  | ENSMUSG0000028524  | Sgip1    | 3  |
| ENSMUSG0000028630  | Dyrk2     | 5  | ENSMUSG0000019970  | Sgk1     | 2  |
| ENSMUSG0000016526  | Dyrk3     | 20 | ENSMUSG0000017868  | Sgk2     | 20 |

|                    |               |    |                    |          |    |
|--------------------|---------------|----|--------------------|----------|----|
| ENSMUSG0000033788  | Dysf          | 3  | ENSMUSG0000025915  | Sgk3     | 9  |
| ENSMUSG0000069085  | Dytn          | 20 | ENSMUSG0000040451  | Sgms1    | 20 |
| ENSMUSG0000037259  | Dzank1        | 18 | ENSMUSG0000026039  | Sgo2a    | 9  |
| ENSMUSG0000042156  | Dzip1         | 9  | ENSMUSG0000020097  | Sgpl1    | 20 |
| ENSMUSG0000037784  | Dzip1l        | 9  | ENSMUSG0000021054  | Sgpp1    | 20 |
| ENSMUSG0000064061  | Dzip3         | 16 | ENSMUSG0000032908  | Sgpp2    | 20 |
| ENSMUSG00000111264 | E030022I16Rik | 20 | ENSMUSG0000005043  | Sgsh     | 20 |
| ENSMUSG00000104851 | E030026E10Rik | 20 | ENSMUSG0000042216  | Sgsm1    | 20 |
| ENSMUSG00000097327 | E030030I06Rik | 8  | ENSMUSG0000038351  | Sgsm2    | 9  |
| ENSMUSG00000087222 | E030042O20Rik | 20 | ENSMUSG0000042303  | Sgsm3    | 20 |
| ENSMUSG00000117011 | E130008D07Rik | 11 | ENSMUSG0000004937  | Sgta     | 2  |
| ENSMUSG00000086782 | E130102H24Rik | 20 | ENSMUSG0000042743  | Sgtb     | 20 |
| ENSMUSG00000048747 | E130114P18Rik | 20 | ENSMUSG00000030733 | Sh2b1    | 20 |
| ENSMUSG00000114069 | E130119H09Rik | 9  | ENSMUSG00000005057 | Sh2b2    | 20 |
| ENSMUSG00000044141 | E130201H02Rik | 20 | ENSMUSG0000042594  | Sh2b3    | 20 |
| ENSMUSG00000074210 | E130208F15Rik | 20 | ENSMUSG00000059013 | Sh2d3c   | 9  |
| ENSMUSG00000087177 | E130307A14Rik | 20 | ENSMUSG00000037833 | Sh2d4b   | 18 |
| ENSMUSG00000045071 | E130308A19Rik | 3  | ENSMUSG00000045349 | Sh2d5    | 9  |
| ENSMUSG00000039244 | E130309D02Rik | 20 | ENSMUSG00000052631 | Sh2d6    | 12 |
| ENSMUSG00000048581 | E130311K13Rik | 20 | ENSMUSG0000040666  | Sh3bgr   | 1  |
| ENSMUSG00000091994 | E130317F20Rik | 20 | ENSMUSG00000031246 | Sh3bgrl  | 20 |
| ENSMUSG00000066170 | E230001N04Rik | 20 | ENSMUSG00000032261 | Sh3bgrl2 | 18 |
| ENSMUSG00000096957 | E230013L22Rik | 13 | ENSMUSG00000028843 | Sh3bgrl3 | 3  |
| ENSMUSG00000087231 | E230016M11Rik | 20 | ENSMUSG00000022436 | Sh3bp1   | 20 |
| ENSMUSG00000104420 | E230020A03Rik | 20 | ENSMUSG00000054520 | Sh3bp2   | 20 |
| ENSMUSG00000108912 | E230020D15Rik | 9  | ENSMUSG00000036206 | Sh3bp4   | 9  |
| ENSMUSG00000044719 | E230025N22Rik | 9  | ENSMUSG00000021892 | Sh3bp5   | 1  |
| ENSMUSG00000097585 | E230029C05Rik | 20 | ENSMUSG00000013646 | Sh3bp5l  | 6  |
| ENSMUSG00000027490 | E2f1          | 20 | ENSMUSG00000028082 | Sh3d19   | 18 |
| ENSMUSG00000018983 | E2f2          | 2  | ENSMUSG00000073758 | Sh3d21   | 3  |
| ENSMUSG00000016477 | E2f3          | 4  | ENSMUSG00000003200 | Sh3gl1   | 20 |
| ENSMUSG00000014859 | E2f4          | 6  | ENSMUSG00000028488 | Sh3gl2   | 19 |
| ENSMUSG00000027552 | E2f5          | 20 | ENSMUSG00000030638 | Sh3gl3   | 3  |
| ENSMUSG00000057469 | E2f6          | 20 | ENSMUSG00000037062 | Sh3glb1  | 1  |
| ENSMUSG00000020185 | E2f7          | 20 | ENSMUSG00000026860 | Sh3glb2  | 3  |
| ENSMUSG00000046179 | E2f8          | 20 | ENSMUSG00000040990 | Sh3kbp1  | 20 |
| ENSMUSG00000037172 | E330009J07Rik | 6  | ENSMUSG00000053617 | Sh3pxd2a | 9  |
| ENSMUSG00000073538 | E330020D12Rik | 20 | ENSMUSG0000040711  | Sh3pxd2b | 19 |
| ENSMUSG00000106383 | E330034L11Rik | 20 | ENSMUSG00000031642 | Sh3rf1   | 2  |
| ENSMUSG00000107531 | E330037G11Rik | 10 | ENSMUSG00000057719 | Sh3rf2   | 9  |
| ENSMUSG00000102973 | E430014B02Rik | 20 | ENSMUSG00000037990 | Sh3rf3   | 18 |
| ENSMUSG00000078580 | E430018J23Rik | 20 | ENSMUSG00000036553 | Sh3tc1   | 20 |
| ENSMUSG00000105519 | E430021H15Rik | 20 | ENSMUSG00000045629 | Sh3tc2   | 20 |
| ENSMUSG00000112964 | E430024I08Rik | 10 | ENSMUSG00000020669 | Sh3yl1   | 3  |
| ENSMUSG00000090069 | E430024P14Rik | 20 | ENSMUSG00000038738 | Shank1   | 19 |
| ENSMUSG00000024137 | E4f1          | 20 | ENSMUSG00000037541 | Shank2   | 1  |
| ENSMUSG00000083889 | E530001F21Rik | 20 | ENSMUSG00000022623 | Shank3   | 8  |
| ENSMUSG00000097820 | E530011L22Rik | 20 | ENSMUSG00000022552 | Sharpin  | 20 |
| ENSMUSG00000021890 | Eaf1          | 20 | ENSMUSG00000044813 | Shb      | 9  |
| ENSMUSG00000022838 | Eaf2          | 20 | ENSMUSG00000042626 | Shc1     | 20 |
| ENSMUSG00000054302 | Eapp          | 20 | ENSMUSG00000020312 | Shc2     | 9  |
| ENSMUSG00000030871 | Ears2         | 20 | ENSMUSG00000021448 | Shc3     | 19 |
| ENSMUSG00000022339 | Ebag9         | 12 | ENSMUSG00000035109 | Shc4     | 20 |
| ENSMUSG00000057098 | Ebf1          | 20 | ENSMUSG00000022322 | Shcbp1   | 20 |
| ENSMUSG00000010476 | Ebf3          | 9  | ENSMUSG00000042708 | Shcbp1l  | 1  |



|                    |            |    |                    |         |    |
|--------------------|------------|----|--------------------|---------|----|
| ENSMUSG00000053552 | Ebf4       | 20 | ENSMUSG00000039154 | Shd     | 6  |
| ENSMUSG00000003206 | Ebi3       | 20 | ENSMUSG00000046280 | She     | 20 |
| ENSMUSG00000028729 | Ebna1bp2   | 12 | ENSMUSG00000033256 | Shf     | 9  |
| ENSMUSG00000031168 | Ebp        | 20 | ENSMUSG00000038884 | Shfl    | 3  |
| ENSMUSG00000021928 | Ebpl       | 20 | ENSMUSG00000002633 | Shh     | 20 |
| ENSMUSG00000021810 | Ecd        | 20 | ENSMUSG00000044461 | Shisa2  | 1  |
| ENSMUSG00000057530 | Ece1       | 20 | ENSMUSG00000050010 | Shisa3  | 9  |
| ENSMUSG00000022842 | Ece2       | 9  | ENSMUSG00000041889 | Shisa4  | 20 |
| ENSMUSG00000026247 | Ecel1      | 19 | ENSMUSG00000025647 | Shisa5  | 20 |
| ENSMUSG00000053898 | Ech1       | 10 | ENSMUSG00000053930 | Shisa6  | 19 |
| ENSMUSG00000019883 | Echdc1     | 20 | ENSMUSG00000053550 | Shisa7  | 9  |
| ENSMUSG00000028601 | Echdc2     | 12 | ENSMUSG00000096883 | Shisa8  | 20 |
| ENSMUSG00000039063 | Echdc3     | 20 | ENSMUSG00000022494 | Shisa9  | 20 |
| ENSMUSG00000025465 | Echs1      | 20 | ENSMUSG00000062760 | Shisal1 | 18 |
| ENSMUSG00000024132 | Eci1       | 20 | ENSMUSG00000089832 | Shkbp1  | 9  |
| ENSMUSG00000021417 | Eci2       | 20 | ENSMUSG00000044991 | Shld1   | 1  |
| ENSMUSG00000028108 | Ecm1       | 20 | ENSMUSG00000041471 | Shld2   | 20 |
| ENSMUSG00000043631 | Ecm2       | 20 | ENSMUSG00000118537 | Shld3   | 20 |
| ENSMUSG00000050812 | Ecpas      | 7  | ENSMUSG00000020534 | Shmt1   | 20 |
| ENSMUSG00000026051 | Ecr4       | 13 | ENSMUSG00000025403 | Shmt2   | 20 |
| ENSMUSG00000073599 | Ecscr      | 20 | ENSMUSG00000024976 | Shoc2   | 20 |
| ENSMUSG00000066839 | Ecsit      | 1  | ENSMUSG00000027833 | Shox2   | 9  |
| ENSMUSG00000027699 | Ect2       | 20 | ENSMUSG00000005951 | Shpk    | 20 |
| ENSMUSG00000071392 | Ect2l      | 20 | ENSMUSG00000090112 | Shprh   | 20 |
| ENSMUSG00000059327 | Eda        | 20 | ENSMUSG00000035378 | Shq1    | 20 |
| ENSMUSG00000034457 | Eda2r      | 20 | ENSMUSG00000018387 | Shroom1 | 20 |
| ENSMUSG00000003227 | Edar       | 20 | ENSMUSG00000045180 | Shroom2 | 20 |
| ENSMUSG00000095105 | Edaradd    | 18 | ENSMUSG00000029381 | Shroom3 | 9  |
| ENSMUSG00000038957 | Edc3       | 20 | ENSMUSG00000068270 | Shroom4 | 12 |
| ENSMUSG00000036270 | Edc4       | 18 | ENSMUSG00000041362 | Shtn1   | 20 |
| ENSMUSG00000030104 | Edem1      | 20 | ENSMUSG00000001942 | Siae    | 20 |
| ENSMUSG00000038312 | Edem2      | 20 | ENSMUSG00000036840 | Siah1a  | 20 |
| ENSMUSG00000043019 | Edem3      | 20 | ENSMUSG00000040749 | Siah1b  | 20 |
| ENSMUSG00000015092 | Edf1       | 12 | ENSMUSG00000036432 | Siah2   | 20 |
| ENSMUSG00000034488 | Edil3      | 18 | ENSMUSG00000091722 | Siah3   | 18 |
| ENSMUSG00000021367 | Edn1       | 20 | ENSMUSG00000022696 | Sidt1   | 5  |
| ENSMUSG00000027524 | Edn3       | 13 | ENSMUSG00000034908 | Sidt2   | 15 |
| ENSMUSG00000031616 | Ednra      | 20 | ENSMUSG00000025494 | Sigirr  | 20 |
| ENSMUSG00000022122 | Ednrb      | 16 | ENSMUSG00000027322 | Siglec1 | 20 |
| ENSMUSG00000039990 | Edrf1      | 20 | ENSMUSG00000030474 | Siglece | 20 |
| ENSMUSG00000036499 | Eea1       | 20 | ENSMUSG00000039013 | Siglecf | 20 |
| ENSMUSG00000030619 | Eed        | 20 | ENSMUSG00000051504 | Siglech | 20 |
| ENSMUSG00000037742 | Eef1a1     | 20 | ENSMUSG00000036078 | Sigmar1 | 20 |
| ENSMUSG00000117822 | Eef1a1-ps1 | 10 | ENSMUSG00000024042 | Sik1    | 1  |
| ENSMUSG00000016349 | Eef1a2     | 19 | ENSMUSG00000037112 | Sik2    | 7  |
| ENSMUSG00000021951 | Eef1akmt1  | 19 | ENSMUSG00000034135 | Sik3    | 1  |
| ENSMUSG00000030960 | Eef1akmt2  | 20 | ENSMUSG00000027854 | Sike1   | 20 |
| ENSMUSG00000115219 | Eef1akmt4  | 20 | ENSMUSG00000024357 | Sil1    | 19 |
| ENSMUSG00000026694 | Eef1aknmt  | 20 | ENSMUSG00000043183 | Simc1   | 1  |
| ENSMUSG00000025967 | Eef1b2     | 12 | ENSMUSG00000042557 | Sin3a   | 7  |
| ENSMUSG00000055762 | Eef1d      | 2  | ENSMUSG00000031622 | Sin3b   | 20 |
| ENSMUSG00000001707 | Eef1e1     | 20 | ENSMUSG00000039985 | Sinhcaf | 20 |
| ENSMUSG00000071644 | Eef1g      | 20 | ENSMUSG00000056917 | Sipa1   | 20 |
| ENSMUSG00000034994 | Eef2       | 18 | ENSMUSG00000042700 | Sipa1l1 | 9  |
| ENSMUSG00000035064 | Eef2k      | 20 | ENSMUSG00000001995 | Sipa1l2 | 9  |

|                   |         |    |                    |          |    |
|-------------------|---------|----|--------------------|----------|----|
| ENSMUSG0000022544 | Eef2kmt | 1  | ENSMUSG0000030583  | Sipa1l3  | 5  |
| ENSMUSG0000033216 | Eefsec  | 18 | ENSMUSG0000037902  | Sirpa    | 18 |
| ENSMUSG0000036611 | Eepd1   | 9  | ENSMUSG0000020063  | Sirt1    | 20 |
| ENSMUSG0000068617 | Efcab1  | 20 | ENSMUSG0000015149  | Sirt2    | 16 |
| ENSMUSG0000020562 | Efcab10 | 20 | ENSMUSG0000025486  | Sirt3    | 20 |
| ENSMUSG0000021176 | Efcab11 | 20 | ENSMUSG0000029524  | Sirt4    | 20 |
| ENSMUSG0000030321 | Efcab12 | 20 | ENSMUSG00000054021 | Sirt5    | 20 |
| ENSMUSG0000034210 | Efcab14 | 12 | ENSMUSG0000034748  | Sirt6    | 20 |
| ENSMUSG0000026495 | Efcab2  | 9  | ENSMUSG0000025138  | Sirt7    | 1  |
| ENSMUSG0000050944 | Efcab5  | 20 | ENSMUSG00000064326 | Siva1    | 12 |
| ENSMUSG0000022441 | Efcab6  | 20 | ENSMUSG0000038805  | Six3     | 9  |
| ENSMUSG0000044083 | Efcab8  | 1  | ENSMUSG00000093460 | Six3os1  | 19 |
| ENSMUSG0000044056 | Efcab9  | 20 | ENSMUSG0000034460  | Six4     | 18 |
| ENSMUSG0000068263 | Efcc1   | 20 | ENSMUSG0000040841  | Six5     | 20 |
| ENSMUSG0000020467 | Efemp1  | 20 | ENSMUSG0000020492  | Ska2     | 20 |
| ENSMUSG0000024909 | Efemp2  | 20 | ENSMUSG0000021965  | Ska3     | 20 |
| ENSMUSG0000023931 | Efhb    | 13 | ENSMUSG0000057058  | Skap1    | 20 |
| ENSMUSG0000041809 | Efhc1   | 13 | ENSMUSG0000059182  | Skap2    | 20 |
| ENSMUSG0000025038 | Efhc2   | 1  | ENSMUSG0000029050  | Ski      | 9  |
| ENSMUSG0000026255 | Efhd1   | 18 | ENSMUSG0000054074  | Skida1   | 20 |
| ENSMUSG0000040659 | Efhd2   | 19 | ENSMUSG0000027660  | Skil     | 7  |
| ENSMUSG0000038563 | Efl1    | 20 | ENSMUSG0000040356  | Skiv2l   | 7  |
| ENSMUSG0000027954 | Efna1   | 20 | ENSMUSG0000022245  | Skor1    | 20 |
| ENSMUSG0000003070 | Efna2   | 20 | ENSMUSG0000036309  | Skp1a    | 12 |
| ENSMUSG0000028039 | Efna3   | 20 | ENSMUSG0000022372  | Sla      | 20 |
| ENSMUSG0000048915 | Efna5   | 19 | ENSMUSG0000055717  | Slain1   | 16 |
| ENSMUSG0000031217 | Efnb1   | 20 | ENSMUSG0000036087  | Slain2   | 12 |
| ENSMUSG0000001300 | Efnb2   | 9  | ENSMUSG0000053318  | Slamf8   | 20 |
| ENSMUSG0000003934 | Efnb3   | 16 | ENSMUSG0000026548  | Slamf9   | 20 |
| ENSMUSG0000015002 | Efr3a   | 19 | ENSMUSG0000004642  | Slbp     | 9  |
| ENSMUSG0000020658 | Efr3b   | 18 | ENSMUSG0000032806  | Slc10a3  | 20 |
| ENSMUSG0000022203 | Efs     | 13 | ENSMUSG0000029219  | Slc10a4  | 9  |
| ENSMUSG0000020929 | Eftud2  | 3  | ENSMUSG0000031684  | Slc10a7  | 20 |
| ENSMUSG0000028017 | Egf     | 20 | ENSMUSG0000026177  | Slc11a1  | 20 |
| ENSMUSG0000063600 | Egfem1  | 11 | ENSMUSG0000023030  | Slc11a2  | 20 |
| ENSMUSG0000000402 | Egfl6   | 20 | ENSMUSG0000027202  | Slc12a1  | 20 |
| ENSMUSG0000026921 | Egfl7   | 20 | ENSMUSG0000024597  | Slc12a2  | 15 |
| ENSMUSG0000015467 | Egfl8   | 20 | ENSMUSG0000031766  | Slc12a3  | 20 |
| ENSMUSG0000042961 | Egflam  | 19 | ENSMUSG0000017765  | Slc12a4  | 13 |
| ENSMUSG0000020122 | Egfr    | 20 | ENSMUSG0000017740  | Slc12a5  | 20 |
| ENSMUSG0000031987 | Egln1   | 20 | ENSMUSG0000027130  | Slc12a6  | 4  |
| ENSMUSG0000058709 | Egln2   | 20 | ENSMUSG0000017756  | Slc12a7  | 13 |
| ENSMUSG0000035105 | Egln3   | 18 | ENSMUSG0000035506  | Slc12a8  | 18 |
| ENSMUSG0000038418 | Egr1    | 9  | ENSMUSG0000037344  | Slc12a9  | 3  |
| ENSMUSG0000033730 | Egr3    | 9  | ENSMUSG0000018459  | Slc13a3  | 20 |
| ENSMUSG0000071341 | Egr4    | 20 | ENSMUSG0000029843  | Slc13a4  | 13 |
| ENSMUSG0000042302 | Ehbp1   | 19 | ENSMUSG0000020805  | Slc13a5  | 20 |
| ENSMUSG0000024937 | Ehbp1l1 | 20 | ENSMUSG0000059336  | Slc14a1  | 20 |
| ENSMUSG0000074364 | Ehd2    | 9  | ENSMUSG0000022899  | Slc15a2  | 20 |
| ENSMUSG0000024065 | Ehd3    | 9  | ENSMUSG0000024737  | Slc15a3  | 15 |
| ENSMUSG0000027293 | Ehd4    | 20 | ENSMUSG0000029416  | Slc15a4  | 20 |
| ENSMUSG0000022853 | Ehhadh  | 20 | ENSMUSG0000032902  | Slc16a1  | 18 |
| ENSMUSG0000036893 | Ehmt1   | 3  | ENSMUSG0000019838  | Slc16a10 | 20 |
| ENSMUSG0000013787 | Ehmt2   | 20 | ENSMUSG0000040938  | Slc16a11 | 20 |
| ENSMUSG0000062762 | Ei24    | 18 | ENSMUSG0000009378  | Slc16a12 | 13 |

|                    |            |    |                    |          |    |
|--------------------|------------|----|--------------------|----------|----|
| ENSMUSG00000091337 | Eid1       | 1  | ENSMUSG00000044367 | Slc16a13 | 20 |
| ENSMUSG00000046058 | Eid2       | 20 | ENSMUSG00000026220 | Slc16a14 | 1  |
| ENSMUSG00000070705 | Eid2b      | 20 | ENSMUSG00000033965 | Slc16a2  | 13 |
| ENSMUSG00000109864 | Eid3       | 20 | ENSMUSG00000025161 | Slc16a3  | 20 |
| ENSMUSG00000035530 | Eif1       | 19 | ENSMUSG00000027896 | Slc16a4  | 20 |
| ENSMUSG00000074553 | Eif1-ps1   | 6  | ENSMUSG00000041920 | Slc16a6  | 9  |
| ENSMUSG00000114179 | Eif1-ps2   | 20 | ENSMUSG00000020102 | Slc16a7  | 2  |
| ENSMUSG00000057561 | Eif1a      | 20 | ENSMUSG00000032988 | Slc16a8  | 13 |
| ENSMUSG00000024841 | Eif1ad     | 9  | ENSMUSG00000037762 | Slc16a9  | 13 |
| ENSMUSG00000067194 | Eif1ax     | 19 | ENSMUSG00000049624 | Slc17a5  | 20 |
| ENSMUSG0000006941  | Eif1b      | 20 | ENSMUSG00000030500 | Slc17a6  | 18 |
| ENSMUSG00000027810 | Eif2a      | 20 | ENSMUSG00000070570 | Slc17a7  | 5  |
| ENSMUSG00000029613 | Eif2ak1    | 20 | ENSMUSG00000019935 | Slc17a8  | 9  |
| ENSMUSG00000024079 | Eif2ak2    | 20 | ENSMUSG00000023393 | Slc17a9  | 9  |
| ENSMUSG00000031668 | Eif2ak3    | 9  | ENSMUSG00000025094 | Slc18a2  | 17 |
| ENSMUSG00000005102 | Eif2ak4    | 1  | ENSMUSG00000100241 | Slc18a3  | 20 |
| ENSMUSG00000029388 | Eif2b1     | 20 | ENSMUSG00000037455 | Slc18b1  | 18 |
| ENSMUSG00000004788 | Eif2b2     | 20 | ENSMUSG00000001436 | Slc19a1  | 20 |
| ENSMUSG00000028683 | Eif2b3     | 20 | ENSMUSG00000040918 | Slc19a2  | 20 |
| ENSMUSG00000029145 | Eif2b4     | 20 | ENSMUSG00000038496 | Slc19a3  | 20 |
| ENSMUSG00000003235 | Eif2b5     | 20 | ENSMUSG00000024935 | Slc1a1   | 19 |
| ENSMUSG00000026427 | Eif2d      | 20 | ENSMUSG00000005089 | Slc1a2   | 9  |
| ENSMUSG00000021116 | Eif2s1     | 20 | ENSMUSG00000005360 | Slc1a3   | 9  |
| ENSMUSG00000074656 | Eif2s2     | 20 | ENSMUSG00000020142 | Slc1a4   | 20 |
| ENSMUSG00000035150 | Eif2s3x    | 19 | ENSMUSG00000001918 | Slc1a5   | 20 |
| ENSMUSG00000069049 | Eif2s3y    | 19 | ENSMUSG00000005357 | Slc1a6   | 7  |
| ENSMUSG00000024991 | Eif3a      | 20 | ENSMUSG00000027397 | Slc20a1  | 18 |
| ENSMUSG00000056076 | Eif3b      | 9  | ENSMUSG00000037656 | Slc20a2  | 20 |
| ENSMUSG00000030738 | Eif3c      | 20 | ENSMUSG00000033147 | Slc22a15 | 18 |
| ENSMUSG00000016554 | Eif3d      | 20 | ENSMUSG00000022199 | Slc22a17 | 18 |
| ENSMUSG00000022336 | Eif3e      | 20 | ENSMUSG00000063652 | Slc22a21 | 20 |
| ENSMUSG00000031029 | Eif3f      | 1  | ENSMUSG00000038267 | Slc22a23 | 9  |
| ENSMUSG00000070319 | Eif3g      | 20 | ENSMUSG00000023828 | Slc22a3  | 1  |
| ENSMUSG00000022312 | Eif3h      | 12 | ENSMUSG00000020334 | Slc22a4  | 18 |
| ENSMUSG00000028798 | Eif3i      | 3  | ENSMUSG00000018900 | Slc22a5  | 12 |
| ENSMUSG00000027236 | Eif3j1     | 20 | ENSMUSG00000024650 | Slc22a6  | 10 |
| ENSMUSG00000043424 | Eif3j2     | 20 | ENSMUSG00000063796 | Slc22a8  | 19 |
| ENSMUSG00000053565 | Eif3k      | 12 | ENSMUSG00000027340 | Slc23a2  | 18 |
| ENSMUSG00000033047 | Eif3l      | 20 | ENSMUSG00000029847 | Slc23a4  | 20 |
| ENSMUSG00000027170 | Eif3m      | 1  | ENSMUSG00000037996 | Slc24a2  | 18 |
| ENSMUSG00000081629 | Eif3s6-ps1 | 20 | ENSMUSG00000063873 | Slc24a3  | 19 |
| ENSMUSG00000091697 | Eif3s6-ps2 | 20 | ENSMUSG00000041771 | Slc24a4  | 9  |
| ENSMUSG00000101188 | Eif4a-ps4  | 20 | ENSMUSG00000035183 | Slc24a5  | 13 |
| ENSMUSG00000059796 | Eif4a1     | 20 | ENSMUSG00000003528 | Slc25a1  | 2  |
| ENSMUSG00000022884 | Eif4a2     | 20 | ENSMUSG00000025792 | Slc25a10 | 20 |
| ENSMUSG00000025580 | Eif4a3     | 10 | ENSMUSG00000014606 | Slc25a11 | 20 |
| ENSMUSG00000058655 | Eif4b      | 20 | ENSMUSG00000027010 | Slc25a12 | 9  |
| ENSMUSG00000028156 | Eif4e      | 20 | ENSMUSG00000015112 | Slc25a13 | 20 |
| ENSMUSG00000026254 | Eif4e2     | 9  | ENSMUSG00000031105 | Slc25a14 | 20 |
| ENSMUSG00000093661 | Eif4e3     | 20 | ENSMUSG00000031482 | Slc25a15 | 20 |
| ENSMUSG00000031490 | Eif4ebp1   | 12 | ENSMUSG00000071253 | Slc25a16 | 20 |
| ENSMUSG00000020091 | Eif4ebp2   | 12 | ENSMUSG00000022404 | Slc25a17 | 20 |
| ENSMUSG00000020454 | Eif4enif1  | 20 | ENSMUSG00000004902 | Slc25a18 | 6  |
| ENSMUSG00000045983 | Eif4g1     | 19 | ENSMUSG00000020744 | Slc25a19 | 20 |
| ENSMUSG00000005610 | Eif4g2     | 3  | ENSMUSG00000032602 | Slc25a20 | 20 |

|                    |            |    |                    |             |    |
|--------------------|------------|----|--------------------|-------------|----|
| ENSMUSG00000028760 | Eif4g3     | 19 | ENSMUSG00000035472 | Slc25a21    | 20 |
| ENSMUSG00000040731 | Eif4h      | 20 | ENSMUSG00000019082 | Slc25a22    | 19 |
| ENSMUSG00000021282 | Eif5       | 1  | ENSMUSG00000046329 | Slc25a23    | 9  |
| ENSMUSG00000078812 | Eif5a      | 2  | ENSMUSG00000040322 | Slc25a24    | 3  |
| ENSMUSG00000050192 | Eif5a2     | 18 | ENSMUSG00000026819 | Slc25a25    | 1  |
| ENSMUSG00000043618 | Eif5a13-ps | 18 | ENSMUSG00000045100 | Slc25a26    | 20 |
| ENSMUSG00000026083 | Eif5b      | 20 | ENSMUSG00000023912 | Slc25a27    | 20 |
| ENSMUSG00000027613 | Eif6       | 12 | ENSMUSG00000040414 | Slc25a28    | 20 |
| ENSMUSG00000036613 | Eipr1      | 20 | ENSMUSG00000021265 | Slc25a29    | 9  |
| ENSMUSG00000036941 | Elac1      | 20 | ENSMUSG00000061904 | Slc25a3     | 20 |
| ENSMUSG00000020549 | Elac2      | 20 | ENSMUSG00000022003 | Slc25a30    | 20 |
| ENSMUSG00000040028 | Elavl1     | 3  | ENSMUSG00000028982 | Slc25a33    | 8  |
| ENSMUSG00000008489 | Elavl2     | 19 | ENSMUSG00000040740 | Slc25a34    | 20 |
| ENSMUSG00000003410 | Elavl3     | 9  | ENSMUSG00000018740 | Slc25a35    | 13 |
| ENSMUSG00000028546 | Elavl4     | 18 | ENSMUSG00000032449 | Slc25a36    | 3  |
| ENSMUSG00000036461 | Elf1       | 20 | ENSMUSG00000034248 | Slc25a37    | 18 |
| ENSMUSG00000037174 | Elf2       | 20 | ENSMUSG00000032519 | Slc25a38    | 20 |
| ENSMUSG00000031103 | Elf4       | 20 | ENSMUSG00000018677 | Slc25a39    | 20 |
| ENSMUSG00000027186 | Elf5       | 20 | ENSMUSG00000031633 | Slc25a4     | 20 |
| ENSMUSG00000048988 | Elfn1      | 20 | ENSMUSG00000054099 | Slc25a40    | 20 |
| ENSMUSG00000043460 | Elfn2      | 5  | ENSMUSG00000002346 | Slc25a42    | 20 |
| ENSMUSG00000009406 | Elk1       | 9  | ENSMUSG00000037636 | Slc25a43    | 20 |
| ENSMUSG00000008398 | Elk3       | 20 | ENSMUSG00000050144 | Slc25a44    | 13 |
| ENSMUSG00000026436 | Elk4       | 10 | ENSMUSG00000024818 | Slc25a45    | 20 |
| ENSMUSG00000070002 | Ell        | 20 | ENSMUSG00000024259 | Slc25a46    | 3  |
| ENSMUSG0000001542  | Ell2       | 3  | ENSMUSG00000048856 | Slc25a47    | 20 |
| ENSMUSG00000041112 | Elmo1      | 1  | ENSMUSG00000016319 | Slc25a5     | 20 |
| ENSMUSG00000017670 | Elmo2      | 20 | ENSMUSG00000045973 | Slc25a51    | 20 |
| ENSMUSG00000014791 | Elmo3      | 1  | ENSMUSG00000044348 | Slc25a53    | 20 |
| ENSMUSG00000041986 | Elmod1     | 9  | ENSMUSG00000046959 | Slc26a1     | 20 |
| ENSMUSG00000035151 | Elmod2     | 20 | ENSMUSG00000040441 | Slc26a10    | 9  |
| ENSMUSG00000056698 | Elmod3     | 20 | ENSMUSG00000039908 | Slc26a11    | 9  |
| ENSMUSG00000042507 | Elmsan1    | 20 | ENSMUSG00000034320 | Slc26a2     | 20 |
| ENSMUSG00000029675 | Eln        | 20 | ENSMUSG00000029015 | Slc26a5     | 9  |
| ENSMUSG00000028668 | Eloa       | 20 | ENSMUSG00000040569 | Slc26a7     | 20 |
| ENSMUSG00000055839 | Elob       | 12 | ENSMUSG00000036196 | Slc26a8     | 20 |
| ENSMUSG00000079658 | Eloc       | 20 | ENSMUSG00000031808 | Slc27a1     | 4  |
| ENSMUSG00000013822 | Elof1      | 20 | ENSMUSG00000027359 | Slc27a2     | 20 |
| ENSMUSG00000006390 | Elov1      | 3  | ENSMUSG00000027932 | Slc27a3     | 6  |
| ENSMUSG00000021364 | Elov12     | 14 | ENSMUSG00000059316 | Slc27a4     | 9  |
| ENSMUSG00000032262 | Elov14     | 12 | ENSMUSG00000021553 | Slc28a3     | 13 |
| ENSMUSG00000032349 | Elov15     | 16 | ENSMUSG00000023942 | Slc29a1     | 20 |
| ENSMUSG00000041220 | Elov16     | 3  | ENSMUSG00000024891 | Slc29a2     | 9  |
| ENSMUSG00000021696 | Elov17     | 20 | ENSMUSG00000020100 | Slc29a3     | 18 |
| ENSMUSG00000028431 | Elp1       | 20 | ENSMUSG00000050822 | Slc29a4     | 13 |
| ENSMUSG00000024271 | Elp2       | 9  | ENSMUSG00000028645 | Slc2a1      | 20 |
| ENSMUSG00000022031 | Elp3       | 20 | ENSMUSG00000027661 | Slc2a10     | 20 |
| ENSMUSG00000027167 | Elp4       | 1  | ENSMUSG00000037490 | Slc2a12     | 13 |
| ENSMUSG00000018565 | Elp5       | 20 | ENSMUSG00000036298 | Slc2a13     | 7  |
| ENSMUSG00000054836 | Elp6       | 20 | ENSMUSG00000003153 | Slc2a3      | 7  |
| ENSMUSG00000021728 | Emb        | 13 | ENSMUSG00000018566 | Slc2a4      | 18 |
| ENSMUSG00000078517 | Emc1       | 1  | ENSMUSG00000085028 | Slc2a4rg-ps | 20 |
| ENSMUSG00000008140 | Emc10      | 20 | ENSMUSG00000028976 | Slc2a5      | 20 |
| ENSMUSG00000022337 | Emc2       | 20 | ENSMUSG00000036067 | Slc2a6      | 20 |
| ENSMUSG00000030286 | Emc3       | 1  | ENSMUSG00000026791 | Slc2a8      | 20 |

|                    |         |    |                    |          |    |
|--------------------|---------|----|--------------------|----------|----|
| ENSMUSG0000027131  | Emc4    | 20 | ENSMUSG0000005107  | Slc2a9   | 20 |
| ENSMUSG0000047260  | Emc6    | 20 | ENSMUSG00000026614 | Slc30a10 | 3  |
| ENSMUSG0000055943  | Emc7    | 11 | ENSMUSG00000029151 | Slc30a3  | 5  |
| ENSMUSG0000031819  | Emc8    | 20 | ENSMUSG00000021629 | Slc30a5  | 3  |
| ENSMUSG0000022217  | Emc9    | 18 | ENSMUSG00000024069 | Slc30a6  | 20 |
| ENSMUSG0000054690  | Emcn    | 20 | ENSMUSG00000054414 | Slc30a7  | 20 |
| ENSMUSG0000001964  | Emd     | 20 | ENSMUSG00000029221 | Slc30a9  | 20 |
| ENSMUSG00000073436 | Eme2    | 20 | ENSMUSG00000066150 | Slc31a1  | 13 |
| ENSMUSG00000004268 | Emg1    | 18 | ENSMUSG00000066152 | Slc31a2  | 17 |
| ENSMUSG00000034164 | Emid1   | 20 | ENSMUSG00000037771 | Slc32a1  | 19 |
| ENSMUSG00000029163 | Emilin1 | 20 | ENSMUSG00000027822 | Slc33a1  | 10 |
| ENSMUSG00000024053 | Emilin2 | 20 | ENSMUSG00000006469 | Slc34a3  | 20 |
| ENSMUSG00000058070 | Eml1    | 18 | ENSMUSG00000028293 | Slc35a1  | 20 |
| ENSMUSG00000040811 | Eml2    | 18 | ENSMUSG00000031156 | Slc35a2  | 20 |
| ENSMUSG00000071647 | Eml3    | 20 | ENSMUSG00000027957 | Slc35a3  | 20 |
| ENSMUSG00000032624 | Eml4    | 16 | ENSMUSG00000033272 | Slc35a4  | 20 |
| ENSMUSG00000051166 | Eml5    | 9  | ENSMUSG00000022664 | Slc35a5  | 20 |
| ENSMUSG00000044072 | Eml6    | 20 | ENSMUSG00000020873 | Slc35b1  | 20 |
| ENSMUSG00000030208 | Emp1    | 20 | ENSMUSG00000037089 | Slc35b2  | 20 |
| ENSMUSG00000022505 | Emp2    | 20 | ENSMUSG00000021432 | Slc35b3  | 20 |
| ENSMUSG00000040212 | Emp3    | 20 | ENSMUSG00000018999 | Slc35b4  | 13 |
| ENSMUSG00000035401 | Emsy    | 9  | ENSMUSG00000049922 | Slc35c1  | 20 |
| ENSMUSG00000033726 | Emx1    | 20 | ENSMUSG00000017664 | Slc35c2  | 20 |
| ENSMUSG00000043969 | Emx2    | 1  | ENSMUSG00000028521 | Slc35d1  | 9  |
| ENSMUSG00000087095 | Emx2os  | 1  | ENSMUSG00000033114 | Slc35d2  | 3  |
| ENSMUSG00000039095 | En2     | 1  | ENSMUSG00000050473 | Slc35d3  | 6  |
| ENSMUSG00000022995 | Enah    | 9  | ENSMUSG00000019731 | Slc35e1  | 12 |
| ENSMUSG00000041773 | Enc1    | 4  | ENSMUSG00000042202 | Slc35e2  | 20 |
| ENSMUSG00000037419 | Endod1  | 4  | ENSMUSG00000060181 | Slc35e3  | 18 |
| ENSMUSG00000015337 | Endog   | 20 | ENSMUSG00000048807 | Slc35e4  | 20 |
| ENSMUSG00000022468 | Endou   | 6  | ENSMUSG00000038602 | Slc35f1  | 9  |
| ENSMUSG00000039850 | Endov   | 20 | ENSMUSG00000042195 | Slc35f2  | 20 |
| ENSMUSG00000026814 | Eng     | 20 | ENSMUSG00000057060 | Slc35f3  | 18 |
| ENSMUSG00000033857 | Engase  | 20 | ENSMUSG00000021852 | Slc35f4  | 7  |
| ENSMUSG00000028445 | Enho    | 4  | ENSMUSG00000026342 | Slc35f5  | 9  |
| ENSMUSG00000013155 | Enkd1   | 20 | ENSMUSG00000029175 | Slc35f6  | 20 |
| ENSMUSG00000026679 | Enkur   | 20 | ENSMUSG00000044026 | Slc35g1  | 20 |
| ENSMUSG00000063524 | Eno1    | 2  | ENSMUSG00000070287 | Slc35g2  | 20 |
| ENSMUSG00000059040 | Eno1b   | 12 | ENSMUSG00000020261 | Slc36a1  | 1  |
| ENSMUSG00000004267 | Eno2    | 20 | ENSMUSG00000043885 | Slc36a4  | 19 |
| ENSMUSG00000060600 | Eno3    | 6  | ENSMUSG00000024036 | Slc37a1  | 20 |
| ENSMUSG00000048029 | Eno4    | 20 | ENSMUSG00000032122 | Slc37a2  | 13 |
| ENSMUSG00000029326 | Enoph1  | 20 | ENSMUSG00000029924 | Slc37a3  | 20 |
| ENSMUSG00000022012 | Enox1   | 9  | ENSMUSG00000032114 | Slc37a4  | 20 |
| ENSMUSG00000031109 | Enox2   | 20 | ENSMUSG00000023169 | Slc38a1  | 18 |
| ENSMUSG00000028024 | Enpep   | 12 | ENSMUSG00000061306 | Slc38a10 | 1  |
| ENSMUSG00000037370 | Enpp1   | 1  | ENSMUSG00000061171 | Slc38a11 | 20 |
| ENSMUSG00000022425 | Enpp2   | 13 | ENSMUSG00000022462 | Slc38a2  | 18 |
| ENSMUSG00000019989 | Enpp3   | 2  | ENSMUSG00000010064 | Slc38a3  | 20 |
| ENSMUSG00000023961 | Enpp4   | 20 | ENSMUSG00000022464 | Slc38a4  | 18 |
| ENSMUSG00000023960 | Enpp5   | 9  | ENSMUSG00000031170 | Slc38a5  | 20 |
| ENSMUSG00000038173 | Enpp6   | 1  | ENSMUSG00000044712 | Slc38a6  | 20 |
| ENSMUSG00000038619 | Ensa    | 12 | ENSMUSG00000036534 | Slc38a7  | 20 |
| ENSMUSG00000048120 | Entpd1  | 9  | ENSMUSG00000034224 | Slc38a8  | 1  |
| ENSMUSG00000015085 | Entpd2  | 20 | ENSMUSG00000047789 | Slc38a9  | 19 |

|                    |            |    |                    |          |    |
|--------------------|------------|----|--------------------|----------|----|
| ENSMUSG00000041608 | Entpd3     | 20 | ENSMUSG00000052310 | Slc39a1  | 20 |
| ENSMUSG00000022066 | Entpd4b    | 20 | ENSMUSG00000025986 | Slc39a10 | 9  |
| ENSMUSG00000021236 | Entpd5     | 9  | ENSMUSG00000041654 | Slc39a11 | 20 |
| ENSMUSG00000033068 | Entpd6     | 20 | ENSMUSG00000036949 | Slc39a12 | 18 |
| ENSMUSG00000025192 | Entpd7     | 20 | ENSMUSG00000002105 | Slc39a13 | 20 |
| ENSMUSG00000026927 | Entr1      | 20 | ENSMUSG00000022094 | Slc39a14 | 16 |
| ENSMUSG00000022338 | Eny2       | 20 | ENSMUSG00000072572 | Slc39a2  | 20 |
| ENSMUSG00000035245 | Eogt       | 18 | ENSMUSG00000046822 | Slc39a3  | 6  |
| ENSMUSG00000032446 | Eomes      | 1  | ENSMUSG00000063354 | Slc39a4  | 20 |
| ENSMUSG00000055024 | Ep300      | 20 | ENSMUSG00000024270 | Slc39a6  | 19 |
| ENSMUSG00000029505 | Ep400      | 12 | ENSMUSG00000024327 | Slc39a7  | 20 |
| ENSMUSG00000024140 | Epas1      | 18 | ENSMUSG00000053897 | Slc39a8  | 20 |
| ENSMUSG00000028906 | Epb41      | 7  | ENSMUSG00000048833 | Slc39a9  | 18 |
| ENSMUSG00000027624 | Epb4111    | 9  | ENSMUSG00000024131 | Slc3a1   | 20 |
| ENSMUSG00000019978 | Epb4112    | 20 | ENSMUSG00000010095 | Slc3a2   | 20 |
| ENSMUSG00000024044 | Epb4113    | 18 | ENSMUSG00000025993 | Slc40a1  | 20 |
| ENSMUSG00000024376 | Epb4114a   | 9  | ENSMUSG00000013275 | Slc41a1  | 9  |
| ENSMUSG00000087590 | Epb4114aos | 20 | ENSMUSG00000034591 | Slc41a2  | 9  |
| ENSMUSG00000028434 | Epb4114b   | 9  | ENSMUSG00000030089 | Slc41a3  | 17 |
| ENSMUSG00000026383 | Epb4115    | 12 | ENSMUSG00000038178 | Slc43a2  | 20 |
| ENSMUSG00000024240 | Epc1       | 20 | ENSMUSG00000027074 | Slc43a3  | 1  |
| ENSMUSG00000069495 | Epc2       | 20 | ENSMUSG00000028412 | Slc44a1  | 16 |
| ENSMUSG00000002808 | Epdr1      | 20 | ENSMUSG00000057193 | Slc44a2  | 1  |
| ENSMUSG00000029859 | Epha1      | 20 | ENSMUSG00000028360 | Slc44a5  | 20 |
| ENSMUSG00000028876 | Epha10     | 9  | ENSMUSG00000039838 | Slc45a1  | 20 |
| ENSMUSG00000006445 | Epha2      | 20 | ENSMUSG00000026435 | Slc45a3  | 1  |
| ENSMUSG00000052504 | Epha3      | 5  | ENSMUSG00000079020 | Slc45a4  | 9  |
| ENSMUSG00000026235 | Epha4      | 5  | ENSMUSG00000020829 | Slc46a1  | 9  |
| ENSMUSG00000029245 | Epha5      | 5  | ENSMUSG00000029650 | Slc46a3  | 20 |
| ENSMUSG00000055540 | Epha6      | 2  | ENSMUSG00000081534 | Slc48a1  | 16 |
| ENSMUSG00000028289 | Epha7      | 5  | ENSMUSG00000022848 | Slc49a4  | 20 |
| ENSMUSG00000028661 | Epha8      | 20 | ENSMUSG00000026904 | Slc4a10  | 1  |
| ENSMUSG00000032537 | Ephb1      | 7  | ENSMUSG00000074796 | Slc4a11  | 1  |
| ENSMUSG00000028664 | Ephb2      | 19 | ENSMUSG00000029141 | Slc4a1ap | 9  |
| ENSMUSG00000005958 | Ephb3      | 20 | ENSMUSG00000028962 | Slc4a2   | 13 |
| ENSMUSG00000029710 | Ephb4      | 20 | ENSMUSG00000006576 | Slc4a3   | 20 |
| ENSMUSG00000029869 | Ephb6      | 18 | ENSMUSG00000060961 | Slc4a4   | 8  |
| ENSMUSG00000038776 | Ephx1      | 1  | ENSMUSG00000068323 | Slc4a5   | 13 |
| ENSMUSG00000022040 | Ephx2      | 9  | ENSMUSG00000021733 | Slc4a7   | 5  |
| ENSMUSG00000033805 | Ephx4      | 20 | ENSMUSG00000023032 | Slc4a8   | 18 |
| ENSMUSG00000055493 | Epm2a      | 19 | ENSMUSG00000024485 | Slc4a9   | 20 |
| ENSMUSG00000046785 | Epm2aip1   | 3  | ENSMUSG00000027953 | Slc50a1  | 12 |
| ENSMUSG00000035203 | Epn1       | 20 | ENSMUSG00000022560 | Slc52a2  | 20 |
| ENSMUSG00000001036 | Epn2       | 9  | ENSMUSG00000027463 | Slc52a3  | 20 |
| ENSMUSG00000010080 | Epn3       | 18 | ENSMUSG00000030769 | Slc5a11  | 19 |
| ENSMUSG00000043439 | Epop       | 1  | ENSMUSG00000030781 | Slc5a2   | 6  |
| ENSMUSG00000006235 | Epor       | 20 | ENSMUSG00000089774 | Slc5a3   | 20 |
| ENSMUSG00000115388 | Eppk1      | 14 | ENSMUSG00000000792 | Slc5a5   | 9  |
| ENSMUSG00000026615 | Eprs       | 1  | ENSMUSG00000006641 | Slc5a6   | 13 |
| ENSMUSG00000028552 | Eps15      | 19 | ENSMUSG00000023945 | Slc5a7   | 9  |
| ENSMUSG00000006276 | Eps15l1    | 1  | ENSMUSG00000030310 | Slc6a1   | 20 |
| ENSMUSG00000015766 | Eps8       | 19 | ENSMUSG00000030307 | Slc6a11  | 18 |
| ENSMUSG00000006154 | Eps8l1     | 20 | ENSMUSG00000030108 | Slc6a13  | 20 |
| ENSMUSG00000025504 | Eps8l2     | 18 | ENSMUSG00000019894 | Slc6a15  | 16 |
| ENSMUSG00000040600 | Eps8l3     | 20 | ENSMUSG00000094152 | Slc6a16  | 20 |

|                    |        |    |                    |          |    |
|--------------------|--------|----|--------------------|----------|----|
| ENSMUSG0000022014  | Epsti1 | 20 | ENSMUSG00000027894 | Slc6a17  | 9  |
| ENSMUSG0000028575  | Eqtn   | 20 | ENSMUSG00000036814 | Slc6a20a | 13 |
| ENSMUSG0000020832  | Eral1  | 20 | ENSMUSG00000021609 | Slc6a3   | 9  |
| ENSMUSG0000021583  | Erap1  | 18 | ENSMUSG00000039728 | Slc6a5   | 1  |
| ENSMUSG00000062312 | Erb2   | 20 | ENSMUSG00000030096 | Slc6a6   | 9  |
| ENSMUSG00000018166 | Erb3   | 16 | ENSMUSG00000052026 | Slc6a7   | 6  |
| ENSMUSG00000062209 | Erb4   | 20 | ENSMUSG00000019558 | Slc6a8   | 16 |
| ENSMUSG00000021709 | Erbin  | 1  | ENSMUSG00000028542 | Slc6a9   | 18 |
| ENSMUSG00000030172 | Erc1   | 5  | ENSMUSG00000041313 | Slc7a1   | 1  |
| ENSMUSG00000040640 | Erc2   | 9  | ENSMUSG00000030495 | Slc7a10  | 13 |
| ENSMUSG00000003549 | Erc3   | 20 | ENSMUSG00000027737 | Slc7a11  | 1  |
| ENSMUSG00000030400 | Erc4   | 18 | ENSMUSG00000069072 | Slc7a14  | 4  |
| ENSMUSG00000024382 | Erc5   | 20 | ENSMUSG00000031596 | Slc7a2   | 20 |
| ENSMUSG00000022545 | Erc6   | 20 | ENSMUSG00000031297 | Slc7a3   | 18 |
| ENSMUSG00000026048 | Erc7   | 12 | ENSMUSG00000022756 | Slc7a4   | 19 |
| ENSMUSG00000054051 | Erc8   | 9  | ENSMUSG00000040010 | Slc7a5   | 20 |
| ENSMUSG00000021470 | Erc9   | 20 | ENSMUSG00000031904 | Slc7a6   | 20 |
| ENSMUSG00000021694 | Erc10  | 20 | ENSMUSG00000033106 | Slc7a6os | 20 |
| ENSMUSG00000040857 | Erf    | 3  | ENSMUSG00000000958 | Slc7a7   | 20 |
| ENSMUSG00000040732 | Erg    | 20 | ENSMUSG00000022180 | Slc7a8   | 20 |
| ENSMUSG00000021252 | Erg28  | 20 | ENSMUSG00000054640 | Slc8a1   | 19 |
| ENSMUSG00000001576 | Erg31  | 20 | ENSMUSG00000030376 | Slc8a2   | 9  |
| ENSMUSG00000030304 | Erg32  | 20 | ENSMUSG00000079055 | Slc8a3   | 18 |
| ENSMUSG00000005881 | Erg33  | 12 | ENSMUSG00000032754 | Slc8b1   | 14 |
| ENSMUSG00000021131 | Erh    | 12 | ENSMUSG00000028854 | Slc9a1   | 1  |
| ENSMUSG00000031527 | Eri1   | 20 | ENSMUSG00000026062 | Slc9a2   | 9  |
| ENSMUSG00000030929 | Eri2   | 20 | ENSMUSG00000036123 | Slc9a3   | 20 |
| ENSMUSG00000033423 | Eri3   | 10 | ENSMUSG00000020733 | Slc9a3r1 | 18 |
| ENSMUSG00000051978 | Eri4   | 20 | ENSMUSG0000002504  | Slc9a3r2 | 20 |
| ENSMUSG00000075302 | Eri5   | 20 | ENSMUSG00000014786 | Slc9a5   | 9  |
| ENSMUSG00000078161 | Eri6   | 20 | ENSMUSG00000060681 | Slc9a6   | 20 |
| ENSMUSG00000044726 | Eri7   | 9  | ENSMUSG00000037341 | Slc9a7   | 20 |
| ENSMUSG00000070471 | Eri8   | 20 | ENSMUSG00000039463 | Slc9a8   | 20 |
| ENSMUSG00000020311 | Erl1   | 3  | ENSMUSG00000031129 | Slc9a9   | 1  |
| ENSMUSG00000025198 | Erl2   | 3  | ENSMUSG00000037994 | Slc9b2   | 20 |
| ENSMUSG00000031483 | Erl3   | 13 | ENSMUSG00000030237 | Slco1a4  | 1  |
| ENSMUSG00000028644 | Ermap  | 20 | ENSMUSG00000030236 | Slco1b2  | 20 |
| ENSMUSG00000036552 | Ermard | 20 | ENSMUSG00000030235 | Slco1c1  | 13 |
| ENSMUSG00000026830 | Ernm   | 16 | ENSMUSG00000032548 | Slco2a1  | 18 |
| ENSMUSG00000046324 | Ermp1  | 20 | ENSMUSG00000030737 | Slco2b1  | 20 |
| ENSMUSG00000020715 | Ern1   | 20 | ENSMUSG00000025790 | Slco3a1  | 20 |
| ENSMUSG00000030866 | Ern2   | 20 | ENSMUSG00000038963 | Slco4a1  | 9  |
| ENSMUSG00000021831 | Ero1l  | 20 | ENSMUSG00000040693 | Slco4c1  | 20 |
| ENSMUSG00000057069 | Ero1lb | 20 | ENSMUSG00000025938 | Slco5a1  | 18 |
| ENSMUSG00000029616 | Erp29  | 20 | ENSMUSG00000021597 | Slf1     | 7  |
| ENSMUSG00000028343 | Erp44  | 20 | ENSMUSG00000036097 | Slf2     | 20 |
| ENSMUSG00000028967 | Errf1  | 20 | ENSMUSG00000054404 | Slfn5    | 20 |
| ENSMUSG00000001946 | Esam   | 20 | ENSMUSG00000047518 | Slfnl1   | 20 |
| ENSMUSG00000024293 | Esco1  | 20 | ENSMUSG00000021040 | Slirp    | 12 |
| ENSMUSG00000021996 | Esd    | 12 | ENSMUSG00000025020 | Slit1    | 5  |
| ENSMUSG00000045624 | Esf1   | 20 | ENSMUSG00000031558 | Slit2    | 20 |
| ENSMUSG00000058290 | Espl1  | 20 | ENSMUSG00000056427 | Slit3    | 9  |
| ENSMUSG00000028943 | Espn   | 20 | ENSMUSG00000075478 | Slitrk1  | 19 |
| ENSMUSG00000019768 | Esr1   | 1  | ENSMUSG00000036790 | Slitrk2  | 20 |
| ENSMUSG00000024955 | Esrra  | 20 | ENSMUSG00000048304 | Slitrk3  | 3  |

|                    |         |    |                    |             |    |
|--------------------|---------|----|--------------------|-------------|----|
| ENSMUSG00000021255 | Esrrb   | 20 | ENSMUSG00000046699 | Slitrk4     | 4  |
| ENSMUSG00000026610 | Esrrg   | 16 | ENSMUSG00000033214 | Slitrk5     | 4  |
| ENSMUSG00000003527 | Ess2    | 20 | ENSMUSG00000045871 | Slitrk6     | 18 |
| ENSMUSG00000025366 | Esyt1   | 18 | ENSMUSG00000025060 | Slk         | 9  |
| ENSMUSG00000021171 | Esyt2   | 20 | ENSMUSG00000021870 | SImap       | 9  |
| ENSMUSG00000037681 | Esyt3   | 20 | ENSMUSG00000017002 | Slpi        | 20 |
| ENSMUSG00000016984 | Etaa1   | 20 | ENSMUSG00000032212 | Sltm        | 20 |
| ENSMUSG00000086468 | Etaa1os | 20 | ENSMUSG00000020409 | Slu7        | 20 |
| ENSMUSG00000024360 | Etf1    | 12 | ENSMUSG00000059772 | Slx1b       | 9  |
| ENSMUSG00000032314 | Etf2    | 20 | ENSMUSG00000039738 | Slx4        | 20 |
| ENSMUSG00000004610 | Etfb    | 12 | ENSMUSG00000027281 | Slx4ip      | 1  |
| ENSMUSG00000039958 | Etfbkmt | 20 | ENSMUSG00000031681 | Smad1       | 9  |
| ENSMUSG00000027809 | Etfdh   | 20 | ENSMUSG00000024563 | Smad2       | 9  |
| ENSMUSG00000040370 | Etfrr1  | 11 | ENSMUSG00000032402 | Smad3       | 9  |
| ENSMUSG00000064254 | Ethe1   | 20 | ENSMUSG00000024515 | Smad4       | 7  |
| ENSMUSG00000036617 | Etl4    | 20 | ENSMUSG00000021540 | Smad5       | 20 |
| ENSMUSG00000030275 | Etnk1   | 7  | ENSMUSG00000036867 | Smad6       | 20 |
| ENSMUSG00000070644 | Etnk2   | 9  | ENSMUSG00000025880 | Smad7       | 16 |
| ENSMUSG00000019232 | Etnppl  | 1  | ENSMUSG00000027796 | Smad9       | 18 |
| ENSMUSG00000089875 | Etohd2  | 20 | ENSMUSG00000053559 | Smagp       | 20 |
| ENSMUSG00000032035 | Ets1    | 20 | ENSMUSG00000026155 | Smap1       | 20 |
| ENSMUSG00000022895 | Ets2    | 18 | ENSMUSG00000032870 | Smap2       | 6  |
| ENSMUSG00000004151 | Etv1    | 3  | ENSMUSG00000031099 | Smarca1     | 15 |
| ENSMUSG00000003382 | Etv3    | 20 | ENSMUSG00000024921 | Smarca2     | 9  |
| ENSMUSG00000017724 | Etv4    | 20 | ENSMUSG00000032187 | Smarca4     | 20 |
| ENSMUSG00000013089 | Etv5    | 7  | ENSMUSG00000031715 | Smarca5     | 20 |
| ENSMUSG00000030199 | Etv6    | 18 | ENSMUSG00000052912 | Smarca5-ps  | 20 |
| ENSMUSG00000035104 | Eva1a   | 20 | ENSMUSG00000029920 | Smarcad1    | 20 |
| ENSMUSG00000050212 | Eva1b   | 20 | ENSMUSG00000039354 | Smarcal1    | 20 |
| ENSMUSG00000039903 | Eva1c   | 20 | ENSMUSG00000000902 | Smarcb1     | 18 |
| ENSMUSG00000029122 | Evc     | 20 | ENSMUSG00000032481 | Smarcc1     | 9  |
| ENSMUSG00000050248 | Evc2    | 20 | ENSMUSG00000025369 | Smarcc2     | 18 |
| ENSMUSG00000078771 | Evi2a   | 16 | ENSMUSG00000023018 | Smarcd1     | 9  |
| ENSMUSG00000011831 | Evi5    | 20 | ENSMUSG00000078619 | Smarcd2     | 20 |
| ENSMUSG00000011832 | Evi5l   | 18 | ENSMUSG00000028949 | Smarcd3     | 1  |
| ENSMUSG00000021262 | Evl     | 20 | ENSMUSG00000037935 | Smarce1     | 20 |
| ENSMUSG00000034282 | Evpl    | 20 | ENSMUSG00000094568 | Smarce1-ps1 | 20 |
| ENSMUSG00000009079 | Ewsr1   | 18 | ENSMUSG00000041133 | Smc1a       | 9  |
| ENSMUSG00000048647 | Exd1    | 18 | ENSMUSG00000022432 | Smc1b       | 10 |
| ENSMUSG00000032705 | Exd2    | 18 | ENSMUSG00000028312 | Smc2        | 13 |
| ENSMUSG00000039748 | Exo1    | 9  | ENSMUSG00000024974 | Smc3        | 20 |
| ENSMUSG00000028629 | Exo5    | 20 | ENSMUSG00000034349 | Smc4        | 20 |
| ENSMUSG00000036435 | Exoc1   | 20 | ENSMUSG00000024943 | Smc5        | 20 |
| ENSMUSG00000021357 | Exoc2   | 20 | ENSMUSG00000020608 | Smc6        | 5  |
| ENSMUSG00000034152 | Exoc3   | 20 | ENSMUSG00000024054 | Smchd1      | 20 |
| ENSMUSG00000043251 | Exoc3l  | 20 | ENSMUSG00000043298 | Smco3       | 12 |
| ENSMUSG00000021280 | Exoc3l4 | 20 | ENSMUSG00000058173 | Smco4       | 20 |
| ENSMUSG00000029763 | Exoc4   | 20 | ENSMUSG00000049323 | Smcr8       | 2  |
| ENSMUSG00000061244 | Exoc5   | 2  | ENSMUSG00000022452 | Smdt1       | 12 |
| ENSMUSG00000053799 | Exoc6   | 6  | ENSMUSG00000030655 | Smg1        | 2  |
| ENSMUSG00000033769 | Exoc6b  | 2  | ENSMUSG00000001415 | Smg5        | 9  |
| ENSMUSG00000020792 | Exoc7   | 1  | ENSMUSG00000038290 | Smg6        | 20 |
| ENSMUSG00000074030 | Exoc8   | 20 | ENSMUSG00000042772 | Smg7        | 20 |
| ENSMUSG00000042787 | Exog    | 20 | ENSMUSG00000020495 | Smg8        | 20 |
| ENSMUSG00000034321 | Exosc1  | 20 | ENSMUSG00000002210 | Smg9        | 9  |



|                    |               |    |                    |           |    |
|--------------------|---------------|----|--------------------|-----------|----|
| ENSMUSG00000017264 | Exosc10       | 3  | ENSMUSG00000078350 | Smim1     | 2  |
| ENSMUSG00000039356 | Exosc2        | 20 | ENSMUSG00000072704 | Smim1011  | 20 |
| ENSMUSG00000028322 | Exosc3        | 20 | ENSMUSG00000054850 | Smim1012a | 16 |
| ENSMUSG00000034259 | Exosc4        | 9  | ENSMUSG00000051989 | Smim11    | 12 |
| ENSMUSG00000061286 | Exosc5        | 20 | ENSMUSG00000042380 | Smim12    | 12 |
| ENSMUSG00000025785 | Exosc7        | 19 | ENSMUSG00000091264 | Smim13    | 3  |
| ENSMUSG00000027752 | Exosc8        | 20 | ENSMUSG00000037822 | Smim14    | 20 |
| ENSMUSG00000027714 | Exosc9        | 20 | ENSMUSG00000071180 | Smim15    | 12 |
| ENSMUSG00000034584 | Exph5         | 1  | ENSMUSG00000093536 | Smim17    | 20 |
| ENSMUSG00000061731 | Ext1          | 12 | ENSMUSG00000094500 | Smim18    | 20 |
| ENSMUSG00000027198 | Ext2          | 20 | ENSMUSG00000031534 | Smim19    | 20 |
| ENSMUSG00000028838 | Extl1         | 20 | ENSMUSG00000061461 | Smim20    | 20 |
| ENSMUSG00000027963 | Extl2         | 20 | ENSMUSG00000078439 | Smim24    | 20 |
| ENSMUSG00000021978 | Extl3         | 18 | ENSMUSG00000074754 | Smim26    | 12 |
| ENSMUSG00000025932 | Eya1          | 20 | ENSMUSG00000028407 | Smim27    | 20 |
| ENSMUSG00000017897 | Eya2          | 20 | ENSMUSG00000038059 | Smim3     | 19 |
| ENSMUSG00000028886 | Eya3          | 20 | ENSMUSG00000058351 | Smim4     | 12 |
| ENSMUSG00000010461 | Eya4          | 1  | ENSMUSG00000048442 | Smim5     | 12 |
| ENSMUSG00000006920 | Ezh1          | 10 | ENSMUSG00000044600 | Smim7     | 20 |
| ENSMUSG00000029687 | Ezh2          | 9  | ENSMUSG00000028295 | Smim8     | 1  |
| ENSMUSG00000052397 | Ezr           | 9  | ENSMUSG00000021645 | Smn1      | 20 |
| ENSMUSG00000038235 | F11r          | 20 | ENSMUSG00000025024 | Smndc1    | 20 |
| ENSMUSG00000021492 | F12           | 20 | ENSMUSG00000001761 | Smo       | 20 |
| ENSMUSG00000039109 | F13a1         | 20 | ENSMUSG00000021136 | Smoc1     | 9  |
| ENSMUSG00000048376 | F2r           | 18 | ENSMUSG00000023886 | Smoc2     | 5  |
| ENSMUSG00000028128 | F3            | 1  | ENSMUSG00000027333 | Smox      | 4  |
| ENSMUSG00000097331 | F420014N23Rik | 20 | ENSMUSG00000037049 | Smpd1     | 9  |
| ENSMUSG00000026579 | F5            | 13 | ENSMUSG00000019822 | Smpd2     | 16 |
| ENSMUSG00000097727 | F630040K05Rik | 9  | ENSMUSG00000031906 | Smpd3     | 9  |
| ENSMUSG00000114442 | F630042J09Rik | 20 | ENSMUSG00000005899 | Smpd4     | 20 |
| ENSMUSG00000052125 | F730043M19Rik | 5  | ENSMUSG00000019872 | Smpdl3a   | 5  |
| ENSMUSG00000031196 | F8            | 20 | ENSMUSG00000028885 | Smpdl3b   | 18 |
| ENSMUSG00000090942 | F830016B08Rik | 20 | ENSMUSG00000071708 | Sms       | 9  |
| ENSMUSG00000103159 | F830112A20Rik | 20 | ENSMUSG00000081752 | Sms-ps    | 9  |
| ENSMUSG00000104576 | F830115B05Rik | 20 | ENSMUSG00000082617 | Smt3h2-ps | 20 |
| ENSMUSG00000103130 | F830212C03Rik | 12 | ENSMUSG00000020439 | Smtn      | 6  |
| ENSMUSG00000078317 | F8a           | 20 | ENSMUSG00000045667 | Smtnl2    | 20 |
| ENSMUSG00000033579 | Fa2h          | 16 | ENSMUSG00000028409 | Smu1      | 12 |
| ENSMUSG00000034171 | Faah          | 9  | ENSMUSG00000036061 | Smug1     | 1  |
| ENSMUSG00000025384 | Faap100       | 9  | ENSMUSG00000038780 | Smurf1    | 9  |
| ENSMUSG00000073684 | Faap20        | 20 | ENSMUSG00000018363 | Smurf2    | 20 |
| ENSMUSG00000030493 | Faap24        | 20 | ENSMUSG00000055027 | Smyd1     | 20 |
| ENSMUSG00000028773 | Fabp3         | 7  | ENSMUSG00000026603 | Smyd2     | 19 |
| ENSMUSG00000056366 | Fabp3-ps1     | 20 | ENSMUSG00000055067 | Smyd3     | 20 |
| ENSMUSG00000027533 | Fabp5         | 12 | ENSMUSG00000018809 | Smyd4     | 20 |
| ENSMUSG00000019874 | Fabp7         | 20 | ENSMUSG00000033706 | Smyd5     | 9  |
| ENSMUSG00000031077 | Fadd          | 20 | ENSMUSG00000022676 | Snai2     | 20 |
| ENSMUSG00000010663 | Fads1         | 1  | ENSMUSG00000006587 | Snai3     | 1  |
| ENSMUSG00000024665 | Fads2         | 1  | ENSMUSG00000027287 | Snap23    | 20 |
| ENSMUSG00000024664 | Fads3         | 13 | ENSMUSG00000027273 | Snap25    | 19 |
| ENSMUSG00000044788 | Fads6         | 9  | ENSMUSG00000022765 | Snap29    | 20 |
| ENSMUSG00000010517 | Faf1          | 1  | ENSMUSG00000009894 | Snap47    | 9  |
| ENSMUSG00000025873 | Faf2          | 20 | ENSMUSG00000033419 | Snap91    | 19 |
| ENSMUSG00000030630 | Fah           | 9  | ENSMUSG00000021113 | Snopc1    | 19 |
| ENSMUSG00000045316 | Fahd1         | 12 | ENSMUSG00000011837 | Snopc2    | 12 |

|                   |          |    |                    |             |    |
|-------------------|----------|----|--------------------|-------------|----|
| ENSMUSG0000027371 | Fahd2a   | 1  | ENSMUSG0000028483  | Snapc3      | 20 |
| ENSMUSG0000032463 | Faim     | 20 | ENSMUSG0000036281  | Snapc4      | 20 |
| ENSMUSG0000023011 | Faim2    | 9  | ENSMUSG0000032398  | Snapc5      | 12 |
| ENSMUSG0000039157 | Fam102a  | 16 | ENSMUSG0000001018  | Snapin      | 20 |
| ENSMUSG0000040339 | Fam102b  | 9  | ENSMUSG0000025889  | Snca        | 18 |
| ENSMUSG0000041629 | Fam104a  | 17 | ENSMUSG0000024534  | Sncaip      | 20 |
| ENSMUSG0000021750 | Fam107a  | 1  | ENSMUSG0000034891  | Sncb        | 18 |
| ENSMUSG0000026655 | Fam107b  | 1  | ENSMUSG0000023064  | Sncg        | 18 |
| ENSMUSG0000027459 | Fam110a  | 20 | ENSMUSG0000001424  | Snd1        | 4  |
| ENSMUSG0000049119 | Fam110b  | 20 | ENSMUSG0000047793  | Sned1       | 9  |
| ENSMUSG0000024691 | Fam111a  | 20 | ENSMUSG0000006058  | Snf8        | 10 |
| ENSMUSG0000029185 | Fam114a1 | 1  | ENSMUSG00000108414 | Snhg1       | 1  |
| ENSMUSG0000020523 | Fam114a2 | 9  | ENSMUSG00000113722 | Snhg10      | 20 |
| ENSMUSG0000038893 | Fam117a  | 3  | ENSMUSG0000044349  | Snhg11      | 11 |
| ENSMUSG0000041040 | Fam117b  | 20 | ENSMUSG00000086290 | Snhg12      | 20 |
| ENSMUSG0000022434 | Fam118a  | 20 | ENSMUSG00000100826 | Snhg14      | 3  |
| ENSMUSG0000050471 | Fam118b  | 20 | ENSMUSG00000085156 | Snhg15      | 20 |
| ENSMUSG0000038014 | Fam120a  | 7  | ENSMUSG0000020812  | Snhg16      | 12 |
| ENSMUSG0000014763 | Fam120b  | 20 | ENSMUSG00000085385 | Snhg17      | 20 |
| ENSMUSG0000025262 | Fam120c  | 2  | ENSMUSG00000096956 | Snhg18      | 20 |
| ENSMUSG0000074922 | Fam122a  | 20 | ENSMUSG00000086859 | Snhg20      | 12 |
| ENSMUSG0000036022 | Fam122b  | 20 | ENSMUSG00000085241 | Snhg3       | 20 |
| ENSMUSG0000035184 | Fam124a  | 1  | ENSMUSG00000117869 | Snhg4       | 15 |
| ENSMUSG0000028995 | Fam126a  | 1  | ENSMUSG00000117694 | Snhg4       | 20 |
| ENSMUSG0000038174 | Fam126b  | 3  | ENSMUSG00000097195 | Snhg5       | 20 |
| ENSMUSG0000026483 | Fam129a  | 20 | ENSMUSG00000098234 | Snhg6       | 12 |
| ENSMUSG0000026796 | Fam129b  | 20 | ENSMUSG00000104960 | Snhg8       | 12 |
| ENSMUSG0000043243 | Fam129c  | 20 | ENSMUSG00000090101 | Snhg9       | 20 |
| ENSMUSG0000050821 | Fam131a  | 20 | ENSMUSG00000050213 | Snip1       | 20 |
| ENSMUSG0000029861 | Fam131b  | 20 | ENSMUSG00000037972 | Snn         | 9  |
| ENSMUSG0000006218 | Fam131c  | 18 | ENSMUSG00000077192 | Snora17     | 10 |
| ENSMUSG0000058503 | Fam133b  | 20 | ENSMUSG00000095530 | Snora19     | 20 |
| ENSMUSG0000026153 | Fam135a  | 2  | ENSMUSG00000064637 | Snora20     | 20 |
| ENSMUSG0000036800 | Fam135b  | 2  | ENSMUSG00000064901 | Snora21     | 10 |
| ENSMUSG0000057497 | Fam136a  | 20 | ENSMUSG00000064451 | Snora23     | 10 |
| ENSMUSG0000037709 | Fam13a   | 9  | ENSMUSG00000065259 | Snora30     | 10 |
| ENSMUSG0000036501 | Fam13b   | 9  | ENSMUSG00000065147 | Snora31     | 10 |
| ENSMUSG0000043259 | Fam13c   | 5  | ENSMUSG00000077767 | Snora35     | 10 |
| ENSMUSG0000070044 | Fam149a  | 18 | ENSMUSG00000077571 | Snora36b    | 20 |
| ENSMUSG0000039599 | Fam149b  | 20 | ENSMUSG00000064602 | Snora41     | 10 |
| ENSMUSG0000034334 | Fam151b  | 20 | ENSMUSG00000088108 | Snora47     | 10 |
| ENSMUSG0000079157 | Fam155a  | 19 | ENSMUSG00000070167 | Snora57     | 10 |
| ENSMUSG0000051000 | Fam160a1 | 13 | ENSMUSG00000064925 | Snora62     | 10 |
| ENSMUSG0000044465 | Fam160a2 | 2  | ENSMUSG00000065642 | Snora69     | 10 |
| ENSMUSG0000033478 | Fam160b1 | 20 | ENSMUSG00000064387 | Snora73a    | 10 |
| ENSMUSG0000022095 | Fam160b2 | 9  | ENSMUSG00000065353 | Snora73b    | 10 |
| ENSMUSG0000049811 | Fam161a  | 13 | ENSMUSG00000089255 | Snora78     | 10 |
| ENSMUSG0000021234 | Fam161b  | 20 | ENSMUSG00000065126 | Snord104    | 10 |
| ENSMUSG0000003955 | Fam162a  | 12 | ENSMUSG00000089093 | Snord11     | 10 |
| ENSMUSG0000015484 | Fam163a  | 18 | ENSMUSG00000080610 | Snord110    | 10 |
| ENSMUSG0000009216 | Fam163b  | 9  | ENSMUSG00000094274 | Snord116112 | 20 |
| ENSMUSG0000042788 | Fam166b  | 20 | ENSMUSG00000064899 | Snord118    | 10 |
| ENSMUSG0000035095 | Fam167a  | 19 | ENSMUSG00000088252 | Snord13     | 10 |
| ENSMUSG0000029461 | Fam168a  | 12 | ENSMUSG00000065822 | Snord15a    | 10 |
| ENSMUSG0000037503 | Fam168b  | 20 | ENSMUSG00000077714 | Snord17     | 10 |

|                   |          |    |                    |          |    |
|-------------------|----------|----|--------------------|----------|----|
| ENSMUSG0000041817 | Fam169a  | 3  | ENSMUSG00000080478 | Snord23  | 10 |
| ENSMUSG0000074071 | Fam169b  | 20 | ENSMUSG00000065219 | Snord32a | 10 |
| ENSMUSG0000050530 | Fam171a1 | 9  | ENSMUSG00000065878 | Snord34  | 10 |
| ENSMUSG0000034685 | Fam171a2 | 20 | ENSMUSG00000065818 | Snord35a | 10 |
| ENSMUSG0000048388 | Fam171b  | 20 | ENSMUSG00000065734 | Snord49a | 10 |
| ENSMUSG0000064138 | Fam172a  | 7  | ENSMUSG00000064437 | Snord49b | 10 |
| ENSMUSG0000057411 | Fam173a  | 20 | ENSMUSG00000092680 | Snord55  | 10 |
| ENSMUSG0000051185 | Fam174a  | 20 | ENSMUSG00000064871 | Snord58b | 2  |
| ENSMUSG0000078670 | Fam174b  | 20 | ENSMUSG00000064778 | Snord59a | 10 |
| ENSMUSG0000095595 | Fam177a  | 20 | ENSMUSG00000065110 | Snord61  | 10 |
| ENSMUSG0000047420 | Fam180a  | 20 | ENSMUSG00000077457 | Snord65  | 10 |
| ENSMUSG0000096753 | Fam181a  | 20 | ENSMUSG00000077239 | Snord66  | 10 |
| ENSMUSG0000051515 | Fam181b  | 20 | ENSMUSG00000077345 | Snord70  | 20 |
| ENSMUSG0000049154 | Fam183b  | 20 | ENSMUSG00000077549 | Snord71  | 20 |
| ENSMUSG0000019856 | Fam184a  | 9  | ENSMUSG00000093044 | Snord8   | 10 |
| ENSMUSG0000015879 | Fam184b  | 9  | ENSMUSG00000064823 | Snord82  | 10 |
| ENSMUSG0000047221 | Fam185a  | 9  | ENSMUSG00000077734 | Snord83b | 10 |
| ENSMUSG0000045350 | Fam186a  | 20 | ENSMUSG00000093178 | Snord87  | 10 |
| ENSMUSG0000078907 | Fam186b  | 9  | ENSMUSG00000077704 | Snord89  | 10 |
| ENSMUSG0000030518 | Fam189a1 | 9  | ENSMUSG00000077756 | Snord90  | 10 |
| ENSMUSG0000071604 | Fam189a2 | 18 | ENSMUSG00000077493 | Snord91a | 20 |
| ENSMUSG0000032657 | Fam189b  | 20 | ENSMUSG00000027457 | Snph     | 8  |
| ENSMUSG0000031774 | Fam192a  | 20 | ENSMUSG00000038145 | Snrk     | 18 |
| ENSMUSG0000037210 | Fam193a  | 2  | ENSMUSG00000003660 | Snrnp200 | 7  |
| ENSMUSG0000021495 | Fam193b  | 20 | ENSMUSG00000040767 | Snrnp25  | 20 |
| ENSMUSG0000042595 | Fam199x  | 19 | ENSMUSG00000001158 | Snrnp27  | 12 |
| ENSMUSG0000057858 | Fam204a  | 20 | ENSMUSG00000029402 | Snrnp35  | 20 |
| ENSMUSG0000032977 | Fam207a  | 20 | ENSMUSG00000021431 | Snrnp48  | 1  |
| ENSMUSG0000020614 | Fam20a   | 20 | ENSMUSG00000063511 | Snrnp70  | 20 |
| ENSMUSG0000033557 | Fam20b   | 18 | ENSMUSG00000061479 | Snrpa    | 20 |
| ENSMUSG0000025854 | Fam20c   | 18 | ENSMUSG00000030512 | Snrpa1   | 20 |
| ENSMUSG0000038121 | Fam210a  | 3  | ENSMUSG00000027404 | Snrpb    | 20 |
| ENSMUSG0000027495 | Fam210b  | 20 | ENSMUSG00000008333 | Snrpb2   | 20 |
| ENSMUSG0000034858 | Fam214a  | 9  | ENSMUSG00000024217 | Snrpc    | 20 |
| ENSMUSG0000036002 | Fam214b  | 9  | ENSMUSG00000002477 | Snrpd1   | 3  |
| ENSMUSG0000029463 | Fam216a  | 9  | ENSMUSG00000040824 | Snrpd2   | 10 |
| ENSMUSG0000045655 | Fam216b  | 14 | ENSMUSG00000020180 | Snrpd3   | 20 |
| ENSMUSG0000021414 | Fam217a  | 20 | ENSMUSG00000090553 | Snrpe    | 12 |
| ENSMUSG0000070476 | Fam217b  | 20 | ENSMUSG00000082044 | Snrpert  | 12 |
| ENSMUSG0000028439 | Fam219a  | 20 | ENSMUSG00000020018 | Snrpf    | 12 |
| ENSMUSG0000032305 | Fam219b  | 20 | ENSMUSG00000057278 | Snrpg    | 20 |
| ENSMUSG0000083012 | Fam220a  | 9  | ENSMUSG00000102252 | Snrpn    | 9  |
| ENSMUSG0000047115 | Fam221a  | 20 | ENSMUSG00000027488 | Snta1    | 20 |
| ENSMUSG0000043633 | Fam221b  | 20 | ENSMUSG00000060429 | Sntb1    | 9  |
| ENSMUSG0000041930 | Fam222a  | 1  | ENSMUSG00000041308 | Sntb2    | 9  |
| ENSMUSG0000037750 | Fam222b  | 20 | ENSMUSG00000025909 | Sntg1    | 20 |
| ENSMUSG0000042564 | Fam227a  | 16 | ENSMUSG00000020672 | Sntg2    | 1  |
| ENSMUSG0000079177 | Fam228a  | 20 | ENSMUSG00000044772 | Sntn     | 20 |
| ENSMUSG0000050545 | Fam228b  | 19 | ENSMUSG00000063480 | Snu13    | 20 |
| ENSMUSG0000051736 | Fam229b  | 20 | ENSMUSG00000055334 | Snupn    | 20 |
| ENSMUSG0000024187 | Fam234a  | 16 | ENSMUSG00000021039 | Snw1     | 9  |
| ENSMUSG0000030207 | Fam234b  | 20 | ENSMUSG00000032382 | Snx1     | 20 |
| ENSMUSG0000050549 | Fam241a  | 20 | ENSMUSG00000038301 | Snx10    | 1  |
| ENSMUSG0000020083 | Fam241b  | 20 | ENSMUSG00000020876 | Snx11    | 20 |
| ENSMUSG0000003039 | Fam32a   | 9  | ENSMUSG00000046032 | Snx12    | 3  |

|                    |         |    |                    |         |    |
|--------------------|---------|----|--------------------|---------|----|
| ENSMUSG00000031399 | Fam3a   | 20 | ENSMUSG00000020590 | Snx13   | 20 |
| ENSMUSG00000029672 | Fam3c   | 3  | ENSMUSG00000032422 | Snx14   | 20 |
| ENSMUSG00000046546 | Fam43a  | 4  | ENSMUSG00000024787 | Snx15   | 20 |
| ENSMUSG00000078235 | Fam43b  | 20 | ENSMUSG00000027534 | Snx16   | 20 |
| ENSMUSG00000024993 | Fam45a  | 20 | ENSMUSG00000029146 | Snx17   | 20 |
| ENSMUSG00000020589 | Fam49a  | 9  | ENSMUSG00000042364 | Snx18   | 20 |
| ENSMUSG00000022378 | Fam49b  | 20 | ENSMUSG00000031993 | Snx19   | 20 |
| ENSMUSG00000001962 | Fam50a  | 20 | ENSMUSG00000034484 | Snx2    | 20 |
| ENSMUSG00000037339 | Fam53a  | 20 | ENSMUSG00000031662 | Snx20   | 20 |
| ENSMUSG00000030956 | Fam53b  | 16 | ENSMUSG00000050373 | Snx21   | 9  |
| ENSMUSG00000034300 | Fam53c  | 9  | ENSMUSG00000039452 | Snx22   | 20 |
| ENSMUSG00000069808 | Fam57a  | 20 | ENSMUSG00000024535 | Snx24   | 20 |
| ENSMUSG00000058966 | Fam57b  | 9  | ENSMUSG00000038291 | Snx25   | 20 |
| ENSMUSG00000056987 | Fam71d  | 20 | ENSMUSG00000028136 | Snx27   | 20 |
| ENSMUSG00000051113 | Fam71e1 | 20 | ENSMUSG00000071669 | Snx29   | 9  |
| ENSMUSG00000079652 | Fam71f2 | 20 | ENSMUSG00000019804 | Snx3    | 19 |
| ENSMUSG00000055184 | Fam72a  | 3  | ENSMUSG00000028385 | Snx30   | 9  |
| ENSMUSG00000028878 | Fam76a  | 20 | ENSMUSG00000013611 | Snx31   | 9  |
| ENSMUSG00000037808 | Fam76b  | 20 | ENSMUSG00000056185 | Snx32   | 11 |
| ENSMUSG00000050592 | Fam78a  | 9  | ENSMUSG00000032733 | Snx33   | 1  |
| ENSMUSG00000060568 | Fam78b  | 6  | ENSMUSG00000022808 | Snx4    | 5  |
| ENSMUSG00000032224 | Fam81a  | 5  | ENSMUSG00000027423 | Snx5    | 20 |
| ENSMUSG00000032358 | Fam83b  | 9  | ENSMUSG00000005656 | Snx6    | 20 |
| ENSMUSG00000027654 | Fam83d  | 1  | ENSMUSG00000028007 | Snx7    | 1  |
| ENSMUSG00000022408 | Fam83f  | 9  | ENSMUSG00000029560 | Snx8    | 18 |
| ENSMUSG00000046761 | Fam83h  | 18 | ENSMUSG0000002365  | Snx9    | 9  |
| ENSMUSG00000043068 | Fam89a  | 20 | ENSMUSG00000026600 | Soat1   | 20 |
| ENSMUSG00000069237 | Fam8a1  | 3  | ENSMUSG00000038248 | Sobp    | 19 |
| ENSMUSG00000028218 | Fam92a  | 18 | ENSMUSG00000020027 | Socs2   | 20 |
| ENSMUSG00000002017 | Fam98a  | 20 | ENSMUSG00000053113 | Socs3   | 20 |
| ENSMUSG00000027349 | Fam98b  | 20 | ENSMUSG00000048379 | Socs4   | 20 |
| ENSMUSG00000030590 | Fam98c  | 3  | ENSMUSG00000037104 | Socs5   | 9  |
| ENSMUSG00000033458 | Fan1    | 20 | ENSMUSG00000056153 | Socs6   | 18 |
| ENSMUSG00000032815 | Fanca   | 12 | ENSMUSG00000038485 | Socs7   | 9  |
| ENSMUSG00000047757 | FanCb   | 9  | ENSMUSG00000022982 | Sod1    | 3  |
| ENSMUSG00000021461 | Fancc   | 12 | ENSMUSG00000006818 | Sod2    | 3  |
| ENSMUSG00000034023 | FanCd2  | 20 | ENSMUSG00000072941 | Sod3    | 13 |
| ENSMUSG00000007570 | Fance   | 20 | ENSMUSG00000055485 | Soga1   | 9  |
| ENSMUSG00000092118 | FanCf   | 9  | ENSMUSG00000038916 | Soga3   | 2  |
| ENSMUSG00000028453 | FanCg   | 20 | ENSMUSG00000022961 | Son     | 4  |
| ENSMUSG00000039187 | Fanci   | 20 | ENSMUSG00000025006 | Sorbs1  | 9  |
| ENSMUSG00000004018 | FanCl   | 20 | ENSMUSG00000031626 | Sorbs2  | 9  |
| ENSMUSG00000055884 | FanCm   | 20 | ENSMUSG00000022091 | Sorbs3  | 16 |
| ENSMUSG00000053111 | Fank1   | 20 | ENSMUSG00000043531 | Sorcs1  | 6  |
| ENSMUSG00000000392 | Fap     | 13 | ENSMUSG00000029093 | Sorcs2  | 8  |
| ENSMUSG00000030759 | Far1    | 7  | ENSMUSG00000063434 | Sorcs3  | 20 |
| ENSMUSG00000030303 | Far2    | 18 | ENSMUSG00000027227 | Sord    | 9  |
| ENSMUSG00000089948 | Far2os1 | 20 | ENSMUSG00000049313 | Sorl1   | 2  |
| ENSMUSG00000086777 | Far2os2 | 20 | ENSMUSG00000068747 | Sort1   | 9  |
| ENSMUSG00000025555 | Farp1   | 18 | ENSMUSG00000024241 | Sos1    | 1  |
| ENSMUSG00000034066 | Farp2   | 20 | ENSMUSG00000034801 | Sos2    | 20 |
| ENSMUSG00000021420 | Fars2   | 20 | ENSMUSG00000036169 | Sostdc1 | 13 |
| ENSMUSG00000003808 | Farsa   | 20 | ENSMUSG00000044352 | Sowaha  | 9  |
| ENSMUSG00000026245 | Farsb   | 19 | ENSMUSG00000045314 | Sowahb  | 18 |
| ENSMUSG00000024778 | Fas     | 20 | ENSMUSG00000098188 | Sowahc  | 20 |

|                    |          |    |                     |         |    |
|--------------------|----------|----|---------------------|---------|----|
| ENSMUSG0000025153  | Fasn     | 12 | ENSMUSG00000096014  | Sox1    | 20 |
| ENSMUSG0000028959  | Fastk    | 20 | ENSMUSG00000033006  | Sox10   | 16 |
| ENSMUSG0000027086  | Fastkd1  | 3  | ENSMUSG00000063632  | Sox11   | 1  |
| ENSMUSG0000025962  | Fastkd2  | 20 | ENSMUSG00000051817  | Sox12   | 20 |
| ENSMUSG0000021532  | Fastkd3  | 20 | ENSMUSG00000070643  | Sox13   | 18 |
| ENSMUSG00000079043 | Fastkd5  | 20 | ENSMUSG00000025902  | Sox17   | 20 |
| ENSMUSG00000070047 | Fat1     | 9  | ENSMUSG00000046470  | Sox18   | 20 |
| ENSMUSG00000074505 | Fat3     | 7  | ENSMUSG00000047935  | Sox1ot  | 1  |
| ENSMUSG00000046743 | Fat4     | 5  | ENSMUSG00000074637  | Sox2    | 12 |
| ENSMUSG00000038274 | Fau      | 3  | ENSMUSG00000061517  | Sox21   | 20 |
| ENSMUSG00000028246 | Faxc     | 3  | ENSMUSG000000105265 | Sox2ot  | 20 |
| ENSMUSG00000020776 | Fbf1     | 1  | ENSMUSG00000045179  | Sox3    | 20 |
| ENSMUSG00000058594 | Fbh1     | 20 | ENSMUSG00000076431  | Sox4    | 14 |
| ENSMUSG00000046865 | Fbl      | 20 | ENSMUSG00000041540  | Sox5    | 9  |
| ENSMUSG00000006219 | Fblim1   | 20 | ENSMUSG00000072677  | Sox5it  | 20 |
| ENSMUSG00000051062 | Fbl1     | 12 | ENSMUSG00000051910  | Sox6    | 20 |
| ENSMUSG00000006369 | Fbln1    | 13 | ENSMUSG00000063060  | Sox7    | 20 |
| ENSMUSG00000064080 | Fbln2    | 20 | ENSMUSG00000024176  | Sox8    | 20 |
| ENSMUSG00000021186 | Fbln5    | 20 | ENSMUSG00000000567  | Sox9    | 20 |
| ENSMUSG00000027386 | Fbln7    | 14 | ENSMUSG00000001280  | Sp1     | 20 |
| ENSMUSG00000027204 | Fbn1     | 20 | ENSMUSG00000026222  | Sp100   | 13 |
| ENSMUSG00000024598 | Fbn2     | 20 | ENSMUSG00000070034  | Sp110   | 20 |
| ENSMUSG00000042423 | Fbrs     | 20 | ENSMUSG00000070031  | Sp140   | 20 |
| ENSMUSG00000043323 | Fbrsl1   | 20 | ENSMUSG00000018678  | Sp2     | 20 |
| ENSMUSG00000066892 | Fbxl12   | 20 | ENSMUSG00000027109  | Sp3     | 20 |
| ENSMUSG00000062470 | Fbxl12os | 20 | ENSMUSG00000063714  | Sp3os   | 9  |
| ENSMUSG00000048520 | Fbxl13   | 13 | ENSMUSG00000025323  | Sp4     | 2  |
| ENSMUSG00000030019 | Fbxl14   | 12 | ENSMUSG00000038560  | Sp6     | 20 |
| ENSMUSG00000025226 | Fbxl15   | 19 | ENSMUSG00000060284  | Sp7     | 20 |
| ENSMUSG00000025738 | Fbxl16   | 9  | ENSMUSG00000048562  | Sp8     | 12 |
| ENSMUSG00000023965 | Fbxl17   | 3  | ENSMUSG00000068859  | Sp9     | 19 |
| ENSMUSG00000066640 | Fbxl18   | 20 | ENSMUSG00000001948  | Spa17   | 20 |
| ENSMUSG00000030811 | Fbxl19   | 20 | ENSMUSG00000028475  | Spaar   | 20 |
| ENSMUSG00000032507 | Fbxl2    | 20 | ENSMUSG00000080316  | Spaca6  | 1  |
| ENSMUSG00000020883 | Fbxl20   | 20 | ENSMUSG00000037617  | Spag1   | 20 |
| ENSMUSG00000035509 | Fbxl21   | 1  | ENSMUSG00000053153  | Spag16  | 13 |
| ENSMUSG00000050503 | Fbxl22   | 20 | ENSMUSG00000027867  | Spag17  | 14 |
| ENSMUSG00000022124 | Fbxl3    | 20 | ENSMUSG00000038180  | Spag4   | 18 |
| ENSMUSG00000040410 | Fbxl4    | 6  | ENSMUSG00000002055  | Spag5   | 19 |
| ENSMUSG00000039753 | Fbxl5    | 20 | ENSMUSG00000037708  | Spag6   | 1  |
| ENSMUSG00000022559 | Fbxl6    | 20 | ENSMUSG00000022783  | Spag6l  | 20 |
| ENSMUSG00000043556 | Fbxl7    | 20 | ENSMUSG00000018287  | Spag7   | 20 |
| ENSMUSG00000033313 | Fbxl8    | 20 | ENSMUSG00000066196  | Spag8   | 14 |
| ENSMUSG00000048232 | Fbxo10   | 5  | ENSMUSG00000020859  | Spag9   | 3  |
| ENSMUSG00000005371 | Fbxo11   | 20 | ENSMUSG00000018593  | Sparc   | 18 |
| ENSMUSG00000034532 | Fbxo16   | 9  | ENSMUSG00000029309  | Sparcl1 | 18 |
| ENSMUSG00000030598 | Fbxo17   | 20 | ENSMUSG00000024068  | Spast   | 3  |
| ENSMUSG00000041556 | Fbxo2    | 20 | ENSMUSG00000028188  | Spata1  | 1  |
| ENSMUSG00000032898 | Fbxo21   | 20 | ENSMUSG00000021990  | Spata13 | 9  |
| ENSMUSG00000032309 | Fbxo22   | 20 | ENSMUSG00000026611  | Spata17 | 20 |
| ENSMUSG00000038365 | Fbxo25   | 18 | ENSMUSG00000029155  | Spata18 | 14 |
| ENSMUSG00000037463 | Fbxo27   | 20 | ENSMUSG00000031991  | Spata19 | 20 |
| ENSMUSG00000047539 | Fbxo28   | 2  | ENSMUSG00000047030  | Spata2  | 3  |
| ENSMUSG00000027180 | Fbxo3    | 18 | ENSMUSG00000045004  | Spata21 | 20 |
| ENSMUSG00000047648 | Fbxo30   | 20 | ENSMUSG00000024352  | Spata24 | 16 |

|                    |         |    |                    |          |    |
|--------------------|---------|----|--------------------|----------|----|
| ENSMUSG0000052934  | Fbxo31  | 20 | ENSMUSG00000033594 | Spata2l  | 9  |
| ENSMUSG0000035329  | Fbxo33  | 19 | ENSMUSG00000026226 | Spata3   | 20 |
| ENSMUSG0000037536  | Fbxo34  | 5  | ENSMUSG00000044787 | Spata32  | 20 |
| ENSMUSG0000073633  | Fbxo36  | 20 | ENSMUSG00000048478 | Spata33  | 1  |
| ENSMUSG0000042211  | Fbxo38  | 20 | ENSMUSG00000020191 | Spata48  | 20 |
| ENSMUSG0000022184  | Fbxo4   | 20 | ENSMUSG00000027722 | Spata5   | 20 |
| ENSMUSG0000047746  | Fbxo40  | 18 | ENSMUSG00000034401 | Spata6   | 17 |
| ENSMUSG0000047013  | Fbxo41  | 4  | ENSMUSG00000021007 | Spata7   | 20 |
| ENSMUSG0000028920  | Fbxo42  | 20 | ENSMUSG00000023935 | Spats1   | 20 |
| ENSMUSG0000029001  | Fbxo44  | 20 | ENSMUSG00000051934 | Spats2   | 20 |
| ENSMUSG0000035764  | Fbxo45  | 20 | ENSMUSG00000038305 | Spats2l  | 9  |
| ENSMUSG0000050428  | Fbxo46  | 20 | ENSMUSG00000074476 | Spc24    | 20 |
| ENSMUSG0000070336  | Fbxo47  | 20 | ENSMUSG00000005233 | Spc25    | 20 |
| ENSMUSG0000044966  | Fbxo48  | 20 | ENSMUSG00000021917 | Spcs1    | 20 |
| ENSMUSG0000019773  | Fbxo5   | 20 | ENSMUSG00000035227 | Spcs2    | 20 |
| ENSMUSG0000055401  | Fbxo6   | 19 | ENSMUSG00000081888 | Spcs2-ps | 20 |
| ENSMUSG00000001786 | Fbxo7   | 20 | ENSMUSG00000054408 | Spcs3    | 9  |
| ENSMUSG00000038206 | Fbxo8   | 20 | ENSMUSG00000024215 | Spdef    | 20 |
| ENSMUSG00000001366 | Fbxo9   | 19 | ENSMUSG00000069910 | Spdl1    | 20 |
| ENSMUSG00000090173 | Fbxw10  | 20 | ENSMUSG00000052525 | Spdya    | 20 |
| ENSMUSG0000020271  | Fbxw11  | 20 | ENSMUSG00000042331 | Specc1   | 20 |
| ENSMUSG0000037816  | Fbxw17  | 20 | ENSMUSG00000033444 | Specc1l  | 20 |
| ENSMUSG0000035949  | Fbxw2   | 20 | ENSMUSG00000027329 | Spef1    | 20 |
| ENSMUSG00000104572 | Fbxw23  | 1  | ENSMUSG00000072663 | Spef2    | 13 |
| ENSMUSG0000040913  | Fbxw4   | 20 | ENSMUSG00000026207 | Sppeg    | 9  |
| ENSMUSG0000015095  | Fbxw5   | 20 | ENSMUSG00000040761 | Spfen    | 20 |
| ENSMUSG0000028086  | Fbxw7   | 9  | ENSMUSG00000033396 | Spg11    | 9  |
| ENSMUSG0000032867  | Fbxw8   | 20 | ENSMUSG00000036580 | Spg20    | 18 |
| ENSMUSG0000008167  | Fbxw9   | 20 | ENSMUSG00000032388 | Spg21    | 3  |
| ENSMUSG0000058715  | Fcer1g  | 5  | ENSMUSG00000000738 | Spg7     | 7  |
| ENSMUSG0000021243  | Fcf1    | 10 | ENSMUSG00000061878 | Sphk1    | 20 |
| ENSMUSG0000015947  | Fcgr1   | 20 | ENSMUSG00000057342 | Sphk2    | 20 |
| ENSMUSG0000026656  | Fcgr2b  | 15 | ENSMUSG00000026163 | Sphkap   | 5  |
| ENSMUSG0000059498  | Fcgr3   | 20 | ENSMUSG00000002111 | Spi1     | 20 |
| ENSMUSG0000003420  | Fcgrt   | 9  | ENSMUSG00000043065 | Spice1   | 20 |
| ENSMUSG0000070000  | Fcho1   | 3  | ENSMUSG00000041974 | Spidr    | 20 |
| ENSMUSG0000041685  | Fcho2   | 20 | ENSMUSG00000021395 | Spin1    | 2  |
| ENSMUSG0000038524  | Fchsd1  | 9  | ENSMUSG00000046550 | Spin2c   | 20 |
| ENSMUSG0000030691  | Fchsd2  | 20 | ENSMUSG00000071722 | Spin4    | 12 |
| ENSMUSG0000052403  | Fcnaos  | 20 | ENSMUSG00000024970 | Spindoc  | 20 |
| ENSMUSG0000089665  | Fcor    | 20 | ENSMUSG00000044176 | Spink10  | 18 |
| ENSMUSG0000070524  | Fcrlb   | 20 | ENSMUSG00000050074 | Spink8   | 4  |
| ENSMUSG0000015852  | Fcrls   | 18 | ENSMUSG00000027315 | Spint1   | 9  |
| ENSMUSG0000033703  | Fcsk    | 20 | ENSMUSG00000074227 | Spint2   | 13 |
| ENSMUSG0000021273  | Fdft1   | 12 | ENSMUSG00000024533 | Spire1   | 19 |
| ENSMUSG0000059743  | Fdps    | 20 | ENSMUSG00000010154 | Spire2   | 9  |
| ENSMUSG0000032051  | Fdx1    | 20 | ENSMUSG00000030741 | Spns1    | 3  |
| ENSMUSG0000079677  | Fdx2    | 20 | ENSMUSG00000040447 | Spns2    | 20 |
| ENSMUSG0000037845  | Fdxacb1 | 2  | ENSMUSG00000020798 | Spns3    | 20 |
| ENSMUSG0000018861  | Fdxr    | 7  | ENSMUSG00000028784 | Spocd1   | 20 |
| ENSMUSG0000024588  | Fech    | 5  | ENSMUSG00000056222 | Spock1   | 18 |
| ENSMUSG0000043683  | Fem1a   | 10 | ENSMUSG00000058297 | Spock2   | 18 |
| ENSMUSG0000032244  | Fem1b   | 2  | ENSMUSG00000054162 | Spock3   | 9  |
| ENSMUSG0000033319  | Fem1c   | 12 | ENSMUSG00000038156 | Spon1    | 19 |
| ENSMUSG0000024742  | Fen1    | 20 | ENSMUSG00000057522 | Spop     | 20 |

|                    |          |    |                    |          |    |
|--------------------|----------|----|--------------------|----------|----|
| ENSMUSG0000097336  | Fendrr   | 20 | ENSMUSG00000026771 | Spopl    | 2  |
| ENSMUSG0000000127  | Fer      | 20 | ENSMUSG00000039660 | Spout1   | 3  |
| ENSMUSG00000037712 | Fermt2   | 20 | ENSMUSG00000029304 | Spp1     | 16 |
| ENSMUSG00000024965 | Fermt3   | 20 | ENSMUSG00000027366 | Sppl2a   | 7  |
| ENSMUSG00000053158 | Fes      | 20 | ENSMUSG00000035206 | Sppl2b   | 9  |
| ENSMUSG00000032118 | Fez1     | 3  | ENSMUSG00000029550 | Sppl3    | 20 |
| ENSMUSG00000056121 | Fez2     | 9  | ENSMUSG00000033735 | Spr      | 12 |
| ENSMUSG00000021743 | Fezf2    | 20 | ENSMUSG00000027351 | Spred1   | 7  |
| ENSMUSG00000025265 | Fgd1     | 1  | ENSMUSG00000045671 | Spred2   | 9  |
| ENSMUSG00000024013 | Fgd2     | 20 | ENSMUSG00000037239 | Spred3   | 20 |
| ENSMUSG00000037946 | Fgd3     | 18 | ENSMUSG00000045733 | Sprn     | 19 |
| ENSMUSG00000022788 | Fgd4     | 1  | ENSMUSG00000050359 | Sprr1a   | 1  |
| ENSMUSG00000034037 | Fgd5     | 20 | ENSMUSG00000031986 | Sprtn    | 20 |
| ENSMUSG00000020021 | Fgd6     | 19 | ENSMUSG00000037211 | Spry1    | 20 |
| ENSMUSG00000036585 | Fgf1     | 15 | ENSMUSG00000022114 | Spry2    | 9  |
| ENSMUSG00000021732 | Fgf10    | 19 | ENSMUSG00000061654 | Spry3    | 20 |
| ENSMUSG00000042826 | Fgf11    | 20 | ENSMUSG00000024427 | Spry4    | 9  |
| ENSMUSG00000022523 | Fgf12    | 18 | ENSMUSG00000036966 | Spryd3   | 12 |
| ENSMUSG00000031137 | Fgf13    | 5  | ENSMUSG00000051346 | Spryd4   | 20 |
| ENSMUSG00000025551 | Fgf14    | 7  | ENSMUSG00000021930 | Spryd7   | 20 |
| ENSMUSG00000031230 | Fgf16    | 9  | ENSMUSG00000039911 | Spsb1    | 20 |
| ENSMUSG00000057967 | Fgf18    | 18 | ENSMUSG00000038451 | Spsb2    | 20 |
| ENSMUSG00000037225 | Fgf2     | 9  | ENSMUSG00000024160 | Spsb3    | 20 |
| ENSMUSG00000031603 | Fgf20    | 20 | ENSMUSG00000046997 | Spsb4    | 18 |
| ENSMUSG00000020327 | Fgf22    | 9  | ENSMUSG00000057738 | Sptan1   | 12 |
| ENSMUSG00000000182 | Fgf23    | 9  | ENSMUSG00000021061 | Sptb     | 9  |
| ENSMUSG00000031074 | Fgf3     | 19 | ENSMUSG00000020315 | Sptbn1   | 19 |
| ENSMUSG00000029337 | Fgf5     | 5  | ENSMUSG00000067889 | Sptbn2   | 9  |
| ENSMUSG00000027208 | Fgf7     | 9  | ENSMUSG00000011751 | Sptbn4   | 9  |
| ENSMUSG00000021974 | Fgf9     | 18 | ENSMUSG00000074899 | Sptbn5   | 1  |
| ENSMUSG00000047632 | Fgfbp3   | 20 | ENSMUSG00000021468 | Sptlc1   | 20 |
| ENSMUSG00000031565 | Fgfr1    | 5  | ENSMUSG00000021036 | Sptlc2   | 18 |
| ENSMUSG00000069135 | Fgfr1op  | 20 | ENSMUSG00000044408 | Sptssa   | 20 |
| ENSMUSG00000040242 | Fgfr1op2 | 9  | ENSMUSG00000043461 | Sptssb   | 18 |
| ENSMUSG00000030849 | Fgfr2    | 16 | ENSMUSG00000049516 | Spty2d1  | 20 |
| ENSMUSG00000054252 | Fgfr3    | 20 | ENSMUSG00000071112 | Spx      | 20 |
| ENSMUSG00000005320 | Fgfr4    | 1  | ENSMUSG00000022351 | Sqle     | 9  |
| ENSMUSG00000008090 | Fgfr11   | 20 | ENSMUSG00000005803 | Sqor     | 19 |
| ENSMUSG00000028573 | Fggy     | 20 | ENSMUSG00000015837 | Sqstm1   | 20 |
| ENSMUSG00000031594 | Fgl1     | 20 | ENSMUSG00000006050 | Sra1     | 12 |
| ENSMUSG00000039899 | Fgl2     | 13 | ENSMUSG00000070637 | Srarp    | 20 |
| ENSMUSG00000028874 | Fgr      | 20 | ENSMUSG00000024135 | Srbd1    | 20 |
| ENSMUSG00000026526 | Fh1      | 20 | ENSMUSG00000027646 | Src      | 19 |
| ENSMUSG00000051435 | Fhad1    | 14 | ENSMUSG00000053877 | Srcap    | 20 |
| ENSMUSG00000041842 | Fhdc1    | 18 | ENSMUSG00000038453 | Srcin1   | 19 |
| ENSMUSG00000060579 | Fhit     | 20 | ENSMUSG00000021594 | Srd5a1   | 20 |
| ENSMUSG00000023092 | Fhl1     | 2  | ENSMUSG00000029233 | Srd5a3   | 18 |
| ENSMUSG00000008136 | Fhl2     | 4  | ENSMUSG00000020538 | Srebf1   | 20 |
| ENSMUSG00000032643 | Fhl3     | 9  | ENSMUSG00000022463 | Srebf2   | 20 |
| ENSMUSG00000050035 | Fhl4     | 20 | ENSMUSG00000032621 | Srek1    | 20 |
| ENSMUSG00000014778 | Fhod1    | 20 | ENSMUSG00000021716 | Srek1ip1 | 20 |
| ENSMUSG00000034295 | Fhod3    | 18 | ENSMUSG00000015605 | Srf      | 9  |
| ENSMUSG00000026841 | Fibcd1   | 9  | ENSMUSG00000024528 | Srfbp1   | 20 |
| ENSMUSG00000074971 | Fibin    | 20 | ENSMUSG00000020121 | Srgap1   | 20 |
| ENSMUSG00000024911 | Fibp     | 20 | ENSMUSG00000026425 | Srgap2   | 3  |

|                     |         |    |                     |        |    |
|---------------------|---------|----|---------------------|--------|----|
| ENSMUSG0000053334   | Ficd    | 20 | ENSMUSG00000030257  | Srgap3 | 4  |
| ENSMUSG0000038417   | Fig4    | 9  | ENSMUSG00000020077  | Srgn   | 9  |
| ENSMUSG00000075324  | Fign    | 18 | ENSMUSG00000003161  | Sri    | 20 |
| ENSMUSG00000035455  | Fign1   | 20 | ENSMUSG00000022519  | Srl    | 1  |
| ENSMUSG00000095440  | Fign2   | 20 | ENSMUSG00000006442  | Srm    | 19 |
| ENSMUSG00000034898  | Filip1  | 9  | ENSMUSG00000009549  | Srp14  | 12 |
| ENSMUSG00000043336  | Filip1l | 20 | ENSMUSG00000014504  | Srp19  | 18 |
| ENSMUSG00000029227  | Fip1l1  | 20 | ENSMUSG00000073079  | Srp54a | 20 |
| ENSMUSG00000085396  | Firre   | 8  | ENSMUSG00000112449  | Srp54b | 20 |
| ENSMUSG00000019054  | Fis1    | 12 | ENSMUSG00000079108  | Srp54c | 20 |
| ENSMUSG00000048486  | Fitm2   | 18 | ENSMUSG00000020780  | Srp68  | 20 |
| ENSMUSG00000061374  | Fiz1    | 3  | ENSMUSG00000036323  | Srp72  | 20 |
| ENSMUSG00000075012  | Fjx1    | 20 | ENSMUSG00000026511  | Srp9   | 12 |
| ENSMUSG00000001555  | Fkbp10  | 20 | ENSMUSG00000004865  | Srpk1  | 9  |
| ENSMUSG00000003355  | Fkbp11  | 12 | ENSMUSG000000062604 | Srpk2  | 18 |
| ENSMUSG000000038074 | Fkbp14  | 20 | ENSMUSG00000002007  | Srpk3  | 20 |
| ENSMUSG00000066151  | Fkbp15  | 20 | ENSMUSG000000032042 | Srpr   | 20 |
| ENSMUSG000000032966 | Fkbp1a  | 18 | ENSMUSG000000032553 | Srprb  | 20 |
| ENSMUSG00000020635  | Fkbp1b  | 9  | ENSMUSG000000090084 | Srpx   | 11 |
| ENSMUSG00000056629  | Fkbp2   | 10 | ENSMUSG000000031253 | Srpx2  | 18 |
| ENSMUSG00000020949  | Fkbp3   | 20 | ENSMUSG00000001323  | Srr    | 9  |
| ENSMUSG00000030357  | Fkbp4   | 9  | ENSMUSG00000029346  | Srrd   | 20 |
| ENSMUSG00000024222  | Fkbp5   | 18 | ENSMUSG00000028809  | Srrm1  | 20 |
| ENSMUSG00000002732  | Fkbp7   | 9  | ENSMUSG000000039218 | Srrm2  | 19 |
| ENSMUSG00000019428  | Fkbp8   | 3  | ENSMUSG000000039860 | Srrm3  | 20 |
| ENSMUSG00000029781  | Fkbp9   | 20 | ENSMUSG000000063919 | Srrm4  | 19 |
| ENSMUSG00000033739  | Fkbp1   | 20 | ENSMUSG000000037364 | Srrt   | 1  |
| ENSMUSG00000048920  | Fkrp    | 20 | ENSMUSG00000018379  | Srsf1  | 5  |
| ENSMUSG00000028414  | Fktn    | 20 | ENSMUSG00000028676  | Srsf10 | 20 |
| ENSMUSG00000042642  | Flad1   | 18 | ENSMUSG000000055436 | Srsf11 | 20 |
| ENSMUSG00000032633  | Flcn    | 16 | ENSMUSG000000054679 | Srsf12 | 16 |
| ENSMUSG00000016087  | Fli1    | 20 | ENSMUSG000000034120 | Srsf2  | 9  |
| ENSMUSG00000002812  | Flii    | 18 | ENSMUSG000000071172 | Srsf3  | 20 |
| ENSMUSG000000031328 | Flna    | 20 | ENSMUSG000000028911 | Srsf4  | 20 |
| ENSMUSG000000025278 | Flnb    | 6  | ENSMUSG000000021134 | Srsf5  | 20 |
| ENSMUSG00000068699  | Flnc    | 1  | ENSMUSG00000016921  | Srsf6  | 1  |
| ENSMUSG000000059714 | Flot1   | 7  | ENSMUSG000000024097 | Srsf7  | 3  |
| ENSMUSG00000061981  | Flot2   | 20 | ENSMUSG000000029538 | Srsf9  | 12 |
| ENSMUSG00000047787  | Flrt1   | 9  | ENSMUSG000000032802 | Srxn1  | 2  |
| ENSMUSG00000047414  | Flrt2   | 2  | ENSMUSG000000037013 | Ss18   | 20 |
| ENSMUSG00000051379  | Flrt3   | 9  | ENSMUSG000000039086 | Ss181  | 2  |
| ENSMUSG00000029648  | Flt1    | 20 | ENSMUSG000000032526 | Ss1812 | 12 |
| ENSMUSG00000042817  | Flt3    | 18 | ENSMUSG000000068882 | Ssb    | 20 |
| ENSMUSG00000110206  | Flt3l   | 1  | ENSMUSG000000029911 | Ssbp1  | 18 |
| ENSMUSG00000020357  | Flt4    | 20 | ENSMUSG000000003992 | Ssbp2  | 19 |
| ENSMUSG00000066595  | Flvcr1  | 20 | ENSMUSG000000061887 | Ssbp3  | 20 |
| ENSMUSG00000034258  | Flvcr2  | 20 | ENSMUSG000000070003 | Ssbp4  | 3  |
| ENSMUSG00000040097  | Flywch1 | 18 | ENSMUSG000000029699 | Ssc4d  | 20 |
| ENSMUSG00000023911  | Flywch2 | 20 | ENSMUSG000000035279 | Ssc5d  | 20 |
| ENSMUSG00000019689  | Fmc1    | 12 | ENSMUSG000000042121 | Ssh1   | 9  |
| ENSMUSG00000044042  | Fmn1    | 19 | ENSMUSG000000037926 | Ssh2   | 3  |
| ENSMUSG00000028354  | Fmn2    | 3  | ENSMUSG000000034616 | Ssh3   | 20 |
| ENSMUSG00000055805  | Fmnl1   | 9  | ENSMUSG000000026966 | Ssna1  | 12 |
| ENSMUSG00000036053  | Fmnl2   | 18 | ENSMUSG000000030255 | Sspn   | 20 |
| ENSMUSG00000023008  | Fmnl3   | 20 | ENSMUSG000000029797 | Sspo   | 9  |



|                    |         |    |                    |            |    |
|--------------------|---------|----|--------------------|------------|----|
| ENSMUSG0000040181  | Fmo1    | 18 | ENSMUSG00000021427 | Ssr1       | 20 |
| ENSMUSG0000040170  | Fmo2    | 20 | ENSMUSG00000041355 | Ssr2       | 20 |
| ENSMUSG0000028088  | Fmo5    | 1  | ENSMUSG00000027828 | Ssr3       | 3  |
| ENSMUSG0000041559  | Fmod    | 19 | ENSMUSG00000002014 | Ssr4       | 12 |
| ENSMUSG0000000838  | Fmr1    | 20 | ENSMUSG00000027067 | Ssrp1      | 20 |
| ENSMUSG00000026193 | Fn1     | 20 | ENSMUSG00000004366 | Sst        | 19 |
| ENSMUSG00000025175 | Fn3k    | 3  | ENSMUSG00000035431 | Sstr1      | 12 |
| ENSMUSG00000039253 | Fn3krp  | 20 | ENSMUSG00000047904 | Sstr2      | 20 |
| ENSMUSG00000075415 | Fnbp1   | 16 | ENSMUSG00000044933 | Sstr3      | 1  |
| ENSMUSG00000039735 | Fnbp1l  | 9  | ENSMUSG00000037014 | Sstr4      | 4  |
| ENSMUSG00000008200 | Fnbp4   | 20 | ENSMUSG00000050824 | Sstr5      | 20 |
| ENSMUSG00000071984 | Fndc1   | 20 | ENSMUSG00000029038 | Ssu72      | 3  |
| ENSMUSG00000074738 | Fndc10  | 20 | ENSMUSG00000036825 | Ssx2ip     | 5  |
| ENSMUSG00000033487 | Fndc3a  | 20 | ENSMUSG00000022403 | St13       | 20 |
| ENSMUSG00000039286 | Fndc3b  | 6  | ENSMUSG00000031995 | St14       | 20 |
| ENSMUSG00000038552 | Fndc4   | 9  | ENSMUSG00000033740 | St18       | 9  |
| ENSMUSG00000001334 | Fndc5   | 18 | ENSMUSG00000013846 | St3gal1    | 20 |
| ENSMUSG00000048721 | Fndc9   | 20 | ENSMUSG00000031749 | St3gal2    | 9  |
| ENSMUSG00000035992 | Fnip1   | 7  | ENSMUSG00000028538 | St3gal3    | 20 |
| ENSMUSG00000061175 | Fnip2   | 6  | ENSMUSG00000032038 | St3gal4    | 18 |
| ENSMUSG00000015994 | Fnta    | 20 | ENSMUSG00000056091 | St3gal5    | 1  |
| ENSMUSG00000033373 | Fntb    | 20 | ENSMUSG00000022747 | St3gal6    | 20 |
| ENSMUSG00000038368 | Focad   | 7  | ENSMUSG00000031024 | St5        | 13 |
| ENSMUSG00000001773 | Folh1   | 1  | ENSMUSG00000022885 | St6gal1    | 20 |
| ENSMUSG00000001827 | Folr1   | 13 | ENSMUSG00000110170 | St6galnac2 | 20 |
| ENSMUSG00000032725 | Folr2   | 20 | ENSMUSG00000057286 | St6galnac2 | 13 |
| ENSMUSG00000022677 | Fopnl   | 20 | ENSMUSG00000052544 | St6galnac3 | 9  |
| ENSMUSG00000021250 | Fos     | 20 | ENSMUSG00000079442 | St6galnac4 | 20 |
| ENSMUSG00000003545 | Fosb    | 6  | ENSMUSG00000039037 | St6galnac5 | 18 |
| ENSMUSG00000029135 | Fosl2   | 20 | ENSMUSG00000026811 | St6galnac6 | 20 |
| ENSMUSG00000050295 | Foxc1   | 20 | ENSMUSG00000029534 | St7        | 2  |
| ENSMUSG00000046714 | Foxc2   | 20 | ENSMUSG00000045576 | St7l       | 2  |
| ENSMUSG00000078302 | Foxd1   | 20 | ENSMUSG00000030283 | St8sia1    | 18 |
| ENSMUSG00000042812 | Foxf1   | 20 | ENSMUSG00000025789 | St8sia2    | 1  |
| ENSMUSG00000038402 | Foxf2   | 20 | ENSMUSG00000056812 | St8sia3    | 9  |
| ENSMUSG00000020950 | Foxg1   | 9  | ENSMUSG00000086128 | St8sia3os  | 9  |
| ENSMUSG00000034227 | Foxj1   | 13 | ENSMUSG00000040710 | St8sia4    | 12 |
| ENSMUSG00000003154 | Foxj2   | 12 | ENSMUSG00000025425 | St8sia5    | 18 |
| ENSMUSG00000032998 | Foxj3   | 20 | ENSMUSG00000003418 | St8sia6    | 18 |
| ENSMUSG00000056493 | Foxk1   | 5  | ENSMUSG00000042286 | Stab1      | 12 |
| ENSMUSG00000039275 | Foxk2   | 20 | ENSMUSG00000035459 | Stab2      | 10 |
| ENSMUSG00000050397 | Foxl2   | 20 | ENSMUSG00000032502 | Stac       | 20 |
| ENSMUSG00000097072 | Foxl2os | 20 | ENSMUSG00000017400 | Stac2      | 20 |
| ENSMUSG00000001517 | Foxm1   | 9  | ENSMUSG00000040287 | Stac3      | 20 |
| ENSMUSG00000034998 | Foxn2   | 9  | ENSMUSG00000037286 | Stag1      | 9  |
| ENSMUSG00000033713 | Foxn3   | 15 | ENSMUSG00000025862 | Stag2      | 2  |
| ENSMUSG00000044167 | Foxo1   | 9  | ENSMUSG00000036928 | Stag3      | 20 |
| ENSMUSG00000048756 | Foxo3   | 9  | ENSMUSG00000026718 | Stam       | 3  |
| ENSMUSG00000042903 | Foxo4   | 20 | ENSMUSG00000055371 | Stam2      | 20 |
| ENSMUSG00000052135 | Foxo6   | 20 | ENSMUSG00000006906 | Stampb     | 12 |
| ENSMUSG00000030067 | Foxp1   | 9  | ENSMUSG00000024776 | Stampbpl1  | 9  |
| ENSMUSG00000029563 | Foxp2   | 20 | ENSMUSG00000038781 | Stap2      | 20 |
| ENSMUSG00000023991 | Foxp4   | 9  | ENSMUSG00000031574 | Star       | 20 |
| ENSMUSG00000038415 | Foxq1   | 20 | ENSMUSG00000030688 | Stard10    | 19 |
| ENSMUSG00000071665 | Foxr2   | 20 | ENSMUSG00000016128 | Stard13    | 20 |

|                    |          |    |                    |          |    |
|--------------------|----------|----|--------------------|----------|----|
| ENSMUSG00000039048 | Foxred1  | 20 | ENSMUSG00000018167 | Stard3   | 12 |
| ENSMUSG00000016552 | Foxred2  | 6  | ENSMUSG00000003062 | Stard3nl | 18 |
| ENSMUSG00000009566 | Fpgs     | 20 | ENSMUSG00000024378 | Stard4   | 18 |
| ENSMUSG00000053870 | Fpgt     | 9  | ENSMUSG00000046027 | Stard5   | 20 |
| ENSMUSG00000054237 | Fra10ac1 | 15 | ENSMUSG00000079608 | Stard6   | 20 |
| ENSMUSG00000034687 | Fras1    | 2  | ENSMUSG00000027367 | Stard7   | 1  |
| ENSMUSG00000067199 | Frat1    | 9  | ENSMUSG00000031216 | Stard8   | 9  |
| ENSMUSG00000047604 | Frat2    | 20 | ENSMUSG00000033705 | Stard9   | 18 |
| ENSMUSG00000059049 | Frem1    | 13 | ENSMUSG00000026104 | Stat1    | 20 |
| ENSMUSG00000037016 | Frem2    | 9  | ENSMUSG00000040033 | Stat2    | 20 |
| ENSMUSG00000042353 | Frem3    | 18 | ENSMUSG00000004040 | Stat3    | 20 |
| ENSMUSG00000031590 | Frg1     | 20 | ENSMUSG00000062939 | Stat4    | 20 |
| ENSMUSG00000087385 | Frg2f1   | 20 | ENSMUSG00000004043 | Stat5a   | 9  |
| ENSMUSG00000049122 | Frmd3    | 20 | ENSMUSG00000020919 | Stat5b   | 20 |
| ENSMUSG00000026657 | Frmd4a   | 3  | ENSMUSG00000002147 | Stat6    | 20 |
| ENSMUSG00000030064 | Frmd4b   | 9  | ENSMUSG00000039536 | Stau1    | 1  |
| ENSMUSG00000027238 | Frmd5    | 9  | ENSMUSG00000025920 | Stau2    | 19 |
| ENSMUSG00000048285 | Frmd6    | 9  | ENSMUSG00000047963 | Stbd1    | 20 |
| ENSMUSG00000036131 | Frmd7    | 20 | ENSMUSG00000014813 | Stc1     | 9  |
| ENSMUSG00000024816 | Frmd8    | 20 | ENSMUSG00000020303 | Stc2     | 20 |
| ENSMUSG00000035615 | Frmpr1   | 18 | ENSMUSG00000015652 | Steap1   | 13 |
| ENSMUSG00000108841 | Frmpr2   | 14 | ENSMUSG00000015653 | Steap2   | 20 |
| ENSMUSG00000042425 | Frmpr3   | 17 | ENSMUSG00000026389 | Steap3   | 20 |
| ENSMUSG00000049176 | Frmpr4   | 20 | ENSMUSG00000012428 | Steap4   | 13 |
| ENSMUSG00000033386 | Frrs1    | 20 | ENSMUSG00000028718 | Stil     | 20 |
| ENSMUSG00000045589 | Frrs1l   | 10 | ENSMUSG00000030987 | Stim1    | 20 |
| ENSMUSG00000020170 | Frs2     | 20 | ENSMUSG00000039156 | Stim2    | 18 |
| ENSMUSG00000023266 | Frs3     | 20 | ENSMUSG00000006526 | Stimate  | 20 |
| ENSMUSG00000056602 | Fry      | 2  | ENSMUSG00000024966 | Stip1    | 20 |
| ENSMUSG00000070733 | Fryl     | 18 | ENSMUSG00000020272 | Stk10    | 20 |
| ENSMUSG00000027004 | Frzb     | 5  | ENSMUSG00000003068 | Stk11    | 20 |
| ENSMUSG00000094595 | Fsbp     | 9  | ENSMUSG00000026213 | Stk11ip  | 20 |
| ENSMUSG00000029581 | Fscn1    | 20 | ENSMUSG00000026201 | Stk16    | 3  |
| ENSMUSG00000011589 | Fsd1     | 20 | ENSMUSG00000026094 | Stk17b   | 20 |
| ENSMUSG00000054752 | Fsd1l    | 3  | ENSMUSG00000061207 | Stk19    | 20 |
| ENSMUSG00000027344 | Fsip1    | 9  | ENSMUSG00000063410 | Stk24    | 18 |
| ENSMUSG00000021765 | Fst      | 1  | ENSMUSG00000026277 | Stk25    | 20 |
| ENSMUSG00000022816 | Fstl1    | 20 | ENSMUSG00000031112 | Stk26    | 9  |
| ENSMUSG00000020325 | Fstl3    | 20 | ENSMUSG00000022329 | Stk3     | 20 |
| ENSMUSG00000036264 | Fstl4    | 6  | ENSMUSG00000039954 | Stk32a   | 9  |
| ENSMUSG00000034098 | Fstl5    | 1  | ENSMUSG00000029123 | Stk32b   | 17 |
| ENSMUSG00000001155 | Ftcd     | 20 | ENSMUSG00000015981 | Stk32c   | 20 |
| ENSMUSG00000091313 | Fth-ps2  | 20 | ENSMUSG00000031027 | Stk33    | 20 |
| ENSMUSG00000024661 | Fth1     | 16 | ENSMUSG00000037885 | Stk35    | 20 |
| ENSMUSG00000050708 | Ftl1     | 19 | ENSMUSG00000033276 | Stk36    | 3  |
| ENSMUSG00000062382 | Ftl1-ps1 | 20 | ENSMUSG00000024006 | Stk38    | 3  |
| ENSMUSG00000082062 | Ftl2-ps  | 12 | ENSMUSG00000001630 | Stk38l   | 18 |
| ENSMUSG00000055932 | Fto      | 20 | ENSMUSG00000027030 | Stk39    | 13 |
| ENSMUSG00000031171 | Ftsj1    | 20 | ENSMUSG00000018209 | Stk4     | 20 |
| ENSMUSG00000020706 | Ftsj3    | 20 | ENSMUSG00000042608 | Stk40    | 20 |
| ENSMUSG00000086370 | Ftx      | 18 | ENSMUSG00000028832 | Stmn1    | 19 |
| ENSMUSG00000028034 | Fubp1    | 20 | ENSMUSG00000027500 | Stmn2    | 9  |
| ENSMUSG00000026843 | Fubp3    | 2  | ENSMUSG00000027581 | Stmn3    | 7  |
| ENSMUSG00000028673 | Fuca1    | 2  | ENSMUSG00000022044 | Stmn4    | 2  |
| ENSMUSG00000019810 | Fuca2    | 9  | ENSMUSG00000042694 | Stn1     | 9  |

|                    |               |    |                    |           |    |
|--------------------|---------------|----|--------------------|-----------|----|
| ENSMUSG0000025040  | Fundc1        | 12 | ENSMUSG0000026880  | Stom      | 20 |
| ENSMUSG0000031198  | Fundc2        | 20 | ENSMUSG0000032333  | Stom1     | 7  |
| ENSMUSG0000025466  | Fuom          | 12 | ENSMUSG0000028455  | Stom2     | 12 |
| ENSMUSG0000030530  | Furin         | 20 | ENSMUSG0000027744  | Stom3     | 20 |
| ENSMUSG0000030795  | Fus           | 12 | ENSMUSG0000033855  | Ston1     | 20 |
| ENSMUSG0000046152  | Fut10         | 1  | ENSMUSG0000020961  | Ston2     | 20 |
| ENSMUSG0000039357  | Fut11         | 9  | ENSMUSG0000036923  | Stox1     | 20 |
| ENSMUSG0000049307  | Fut4          | 20 | ENSMUSG0000038143  | Stox2     | 20 |
| ENSMUSG0000021065  | Fut8          | 12 | ENSMUSG0000028801  | Stpg1     | 20 |
| ENSMUSG0000055373  | Fut9          | 3  | ENSMUSG0000047940  | Stpg2     | 20 |
| ENSMUSG0000011658  | Fuz           | 20 | ENSMUSG0000032327  | Stra6     | 20 |
| ENSMUSG0000070583  | Fv1           | 20 | ENSMUSG0000028327  | Stra6l    | 20 |
| ENSMUSG0000059363  | Fxn           | 20 | ENSMUSG0000069631  | Strada    | 20 |
| ENSMUSG0000027680  | Fxr1          | 20 | ENSMUSG0000026027  | Stradb    | 20 |
| ENSMUSG0000018765  | Fxr2          | 20 | ENSMUSG0000030224  | Strap     | 20 |
| ENSMUSG0000036570  | Fxyd1         | 3  | ENSMUSG0000026915  | Strbp     | 18 |
| ENSMUSG0000059412  | Fxyd2         | 19 | ENSMUSG0000033498  | Strc      | 18 |
| ENSMUSG0000057092  | Fxyd3         | 1  | ENSMUSG0000014601  | Strip1    | 9  |
| ENSMUSG0000009687  | Fxyd5         | 20 | ENSMUSG0000039629  | Strip2    | 18 |
| ENSMUSG0000066705  | Fxyd6         | 17 | ENSMUSG00000103476 | Strit1    | 1  |
| ENSMUSG0000036578  | Fxyd7         | 16 | ENSMUSG0000024077  | Strn      | 9  |
| ENSMUSG0000022148  | Fyb           | 20 | ENSMUSG0000020954  | Strn3     | 7  |
| ENSMUSG0000078612  | Fyb2          | 4  | ENSMUSG0000030374  | Strn4     | 9  |
| ENSMUSG0000025241  | Fyco1         | 20 | ENSMUSG0000032116  | Stt3a     | 20 |
| ENSMUSG0000019843  | Fyn           | 20 | ENSMUSG0000032437  | Stt3b     | 12 |
| ENSMUSG0000022800  | Fytd1         | 20 | ENSMUSG0000039615  | Stub1     | 2  |
| ENSMUSG0000044674  | Fzd1          | 9  | ENSMUSG0000053963  | Stum      | 16 |
| ENSMUSG0000081683  | Fzd10         | 18 | ENSMUSG0000028879  | Stx12     | 1  |
| ENSMUSG0000072591  | Fzd10os       | 18 | ENSMUSG0000027522  | Stx16     | 10 |
| ENSMUSG0000050288  | Fzd2          | 20 | ENSMUSG0000061455  | Stx17     | 20 |
| ENSMUSG0000007989  | Fzd3          | 7  | ENSMUSG0000029125  | Stx18     | 20 |
| ENSMUSG0000049791  | Fzd4          | 13 | ENSMUSG0000007207  | Stx1a     | 16 |
| ENSMUSG0000045005  | Fzd5          | 20 | ENSMUSG0000030806  | Stx1b     | 20 |
| ENSMUSG0000041075  | Fzd7          | 13 | ENSMUSG0000029428  | Stx2      | 20 |
| ENSMUSG0000036904  | Fzd8          | 18 | ENSMUSG0000041488  | Stx3      | 20 |
| ENSMUSG0000049551  | Fzd9          | 9  | ENSMUSG0000030805  | Stx4a     | 20 |
| ENSMUSG0000020235  | Fzr1          | 20 | ENSMUSG0000010110  | Stx5a     | 5  |
| ENSMUSG0000009633  | G0s2          | 20 | ENSMUSG0000026470  | Stx6      | 18 |
| ENSMUSG0000035293  | G2e3          | 20 | ENSMUSG0000019998  | Stx7      | 1  |
| ENSMUSG0000018583  | G3bp1         | 20 | ENSMUSG0000020903  | Stx8      | 10 |
| ENSMUSG0000029405  | G3bp2         | 3  | ENSMUSG0000026797  | Stxbp1    | 9  |
| ENSMUSG0000086308  | G630016G05Rik | 18 | ENSMUSG0000004626  | Stxbp2    | 20 |
| ENSMUSG0000085620  | G630018N14Rik | 1  | ENSMUSG0000027882  | Stxbp3    | 20 |
| ENSMUSG00000106896 | G630022F23Rik | 20 | ENSMUSG0000071640  | Stxbp3-ps | 20 |
| ENSMUSG0000097149  | G630030J09Rik | 20 | ENSMUSG0000020546  | Stxbp4    | 20 |
| ENSMUSG00000114959 | G630093K05Rik | 1  | ENSMUSG0000019790  | Stxbp5    | 1  |
| ENSMUSG0000034793  | G6pc3         | 9  | ENSMUSG0000022829  | Stxbp5l   | 2  |
| ENSMUSG0000031400  | G6pdx         | 4  | ENSMUSG0000046314  | Stxbp6    | 19 |
| ENSMUSG0000097573  | G730003C15Rik | 20 | ENSMUSG0000032899  | Styk1     | 20 |
| ENSMUSG0000025579  | Gaa           | 10 | ENSMUSG0000053205  | Styx      | 20 |
| ENSMUSG0000031714  | Gab1          | 16 | ENSMUSG0000019178  | Styxl1    | 20 |
| ENSMUSG0000004508  | Gab2          | 1  | ENSMUSG0000022205  | Sub1      | 18 |
| ENSMUSG0000032750  | Gab3          | 9  | ENSMUSG0000022110  | Sucla2    | 9  |
| ENSMUSG0000018567  | Gabarap       | 12 | ENSMUSG0000052738  | Suclg1    | 10 |
| ENSMUSG0000030161  | Gabarapl1     | 10 | ENSMUSG0000061838  | Suclg2    | 20 |

|                    |            |    |                    |         |    |
|--------------------|------------|----|--------------------|---------|----|
| ENSMUSG00000031950 | Gabarapl2  | 12 | ENSMUSG00000040297 | Suco    | 20 |
| ENSMUSG00000024462 | Gabbr1     | 20 | ENSMUSG00000066900 | Suds3   | 20 |
| ENSMUSG00000039809 | Gabbr2     | 19 | ENSMUSG00000025231 | Sufu    | 20 |
| ENSMUSG00000008976 | Gabpa      | 20 | ENSMUSG00000055137 | Sugct   | 1  |
| ENSMUSG00000027361 | Gabpb1     | 20 | ENSMUSG00000011306 | Sugp1   | 20 |
| ENSMUSG00000038766 | Gabpb2     | 20 | ENSMUSG00000036054 | Sugp2   | 1  |
| ENSMUSG00000010803 | Gabra1     | 3  | ENSMUSG00000022024 | Sugt1   | 20 |
| ENSMUSG00000000560 | Gabra2     | 18 | ENSMUSG00000016918 | Sulf1   | 13 |
| ENSMUSG00000031343 | Gabra3     | 17 | ENSMUSG00000006800 | Sulf2   | 9  |
| ENSMUSG00000029211 | Gabra4     | 8  | ENSMUSG00000030711 | Sult1a1 | 20 |
| ENSMUSG00000055078 | Gabra5     | 5  | ENSMUSG00000003271 | Sult2b1 | 20 |
| ENSMUSG00000029212 | Gabrb1     | 19 | ENSMUSG00000018865 | Sult4a1 | 9  |
| ENSMUSG00000007653 | Gabrb2     | 3  | ENSMUSG00000030101 | Sumf1   | 20 |
| ENSMUSG00000033676 | Gabrb3     | 6  | ENSMUSG00000025538 | Sumf2   | 1  |
| ENSMUSG00000029054 | Gabrd      | 1  | ENSMUSG00000026021 | Sumo1   | 20 |
| ENSMUSG00000031340 | Gabre      | 17 | ENSMUSG00000020738 | Sumo2   | 20 |
| ENSMUSG00000001260 | Gabrg1     | 20 | ENSMUSG00000020265 | Sumo3   | 19 |
| ENSMUSG00000020436 | Gabrg2     | 20 | ENSMUSG00000036817 | Sun1    | 20 |
| ENSMUSG00000055026 | Gabrg3     | 9  | ENSMUSG00000042524 | Sun2    | 9  |
| ENSMUSG00000031344 | Gabrq      | 17 | ENSMUSG00000049858 | Suox    | 20 |
| ENSMUSG00000023267 | Gabrr2     | 16 | ENSMUSG00000035726 | Supt16  | 20 |
| ENSMUSG00000070880 | Gad1       | 19 | ENSMUSG00000027751 | Supt20  | 6  |
| ENSMUSG00000090665 | Gad1-ps    | 20 | ENSMUSG00000038954 | Supt3   | 9  |
| ENSMUSG00000087264 | Gad1os     | 20 | ENSMUSG00000020485 | Supt4a  | 2  |
| ENSMUSG00000026787 | Gad2       | 19 | ENSMUSG00000110960 | Supt4b  | 20 |
| ENSMUSG00000036390 | Gadd45a    | 20 | ENSMUSG00000003435 | Supt5   | 20 |
| ENSMUSG00000015312 | Gadd45b    | 20 | ENSMUSG00000002052 | Supt6   | 9  |
| ENSMUSG00000021453 | Gadd45g    | 20 | ENSMUSG00000053134 | Supt7l  | 10 |
| ENSMUSG00000033751 | Gadd45gip1 | 12 | ENSMUSG00000020079 | Supv3l1 | 20 |
| ENSMUSG00000056880 | Gadl1      | 12 | ENSMUSG00000015790 | Surf1   | 20 |
| ENSMUSG00000062234 | Gak        | 20 | ENSMUSG00000014873 | Surf2   | 20 |
| ENSMUSG00000024907 | Gal        | 20 | ENSMUSG00000014867 | Surf4   | 20 |
| ENSMUSG00000049721 | Gal3st1    | 18 | ENSMUSG00000036160 | Surf6   | 20 |
| ENSMUSG00000047658 | Gal3st3    | 9  | ENSMUSG00000038578 | Susd1   | 6  |
| ENSMUSG00000021003 | Galc       | 19 | ENSMUSG00000006342 | Susd2   | 20 |
| ENSMUSG00000028671 | Gale       | 9  | ENSMUSG00000021384 | Susd3   | 12 |
| ENSMUSG00000020766 | Galk1      | 20 | ENSMUSG00000038576 | Susd4   | 20 |
| ENSMUSG00000027207 | Galk2      | 20 | ENSMUSG00000086596 | Susd5   | 9  |
| ENSMUSG00000035473 | Galm       | 13 | ENSMUSG00000021133 | Susd6   | 5  |
| ENSMUSG00000015027 | Galns      | 20 | ENSMUSG00000039231 | Suv39h1 | 20 |
| ENSMUSG00000000420 | Galnt1     | 18 | ENSMUSG00000026646 | Suv39h2 | 20 |
| ENSMUSG00000020520 | Galnt10    | 9  | ENSMUSG00000017548 | Suz12   | 20 |
| ENSMUSG00000038072 | Galnt11    | 20 | ENSMUSG00000038486 | Sv2a    | 9  |
| ENSMUSG00000039774 | Galnt12    | 20 | ENSMUSG00000053025 | Sv2b    | 1  |
| ENSMUSG00000060988 | Galnt13    | 7  | ENSMUSG00000051111 | Sv2c    | 20 |
| ENSMUSG00000024064 | Galnt14    | 20 | ENSMUSG00000028643 | Svbp    | 20 |
| ENSMUSG00000021903 | Galnt15    | 20 | ENSMUSG00000028369 | Svep1   | 17 |
| ENSMUSG00000021130 | Galnt16    | 19 | ENSMUSG00000109648 | Svet1   | 20 |
| ENSMUSG00000034040 | Galnt17    | 19 | ENSMUSG00000024236 | Svil    | 9  |
| ENSMUSG00000038296 | Galnt18    | 9  | ENSMUSG00000074093 | Svip    | 18 |
| ENSMUSG00000089704 | Galnt2     | 20 | ENSMUSG00000042078 | Svop    | 20 |
| ENSMUSG00000026994 | Galnt3     | 20 | ENSMUSG00000031015 | Swap70  | 19 |
| ENSMUSG00000090035 | Galnt4     | 20 | ENSMUSG00000044627 | Swi5    | 12 |
| ENSMUSG00000037280 | Galnt6     | 15 | ENSMUSG00000051238 | Swsap1  | 20 |
| ENSMUSG00000031608 | Galnt7     | 20 | ENSMUSG00000052748 | Swt1    | 20 |

|                    |            |    |                   |          |    |
|--------------------|------------|----|-------------------|----------|----|
| ENSMUSG0000033316  | Galnt9     | 19 | ENSMUSG0000031357 | Syap1    | 20 |
| ENSMUSG0000096914  | Galnt16    | 7  | ENSMUSG0000022340 | Sybu     | 18 |
| ENSMUSG0000024553  | Galr1      | 20 | ENSMUSG0000025480 | Syce1    | 20 |
| ENSMUSG0000036073  | Galt       | 5  | ENSMUSG0000003824 | Syce2    | 20 |
| ENSMUSG0000020150  | Gamt       | 9  | ENSMUSG0000060445 | Sycp2    | 1  |
| ENSMUSG0000052557  | Gan        | 3  | ENSMUSG0000038651 | Sycp2l   | 20 |
| ENSMUSG0000071650  | Ganab      | 20 | ENSMUSG0000020059 | Sycp3    | 20 |
| ENSMUSG0000062646  | Ganc       | 20 | ENSMUSG0000032714 | Syde1    | 20 |
| ENSMUSG0000047261  | Gap43      | 9  | ENSMUSG0000036863 | Syde2    | 1  |
| ENSMUSG0000057666  | Gapdh      | 12 | ENSMUSG0000028821 | Syf2     | 3  |
| ENSMUSG0000098149  | Gapdh-ps14 | 20 | ENSMUSG0000021457 | Syk      | 12 |
| ENSMUSG0000096438  | Gapdh-ps15 | 12 | ENSMUSG0000023118 | Sympk    | 20 |
| ENSMUSG0000061099  | Gapdhs     | 20 | ENSMUSG0000037217 | Syn1     | 1  |
| ENSMUSG0000026867  | Gapvd1     | 12 | ENSMUSG0000009394 | Syn2     | 5  |
| ENSMUSG0000028010  | Gar1       | 20 | ENSMUSG0000059602 | Syn3     | 6  |
| ENSMUSG0000042680  | Garem1     | 9  | ENSMUSG0000001333 | Sync     | 20 |
| ENSMUSG0000044576  | Garem2     | 3  | ENSMUSG0000032423 | Syncrip  | 2  |
| ENSMUSG0000038860  | Garnl3     | 20 | ENSMUSG0000074736 | Syndig1  | 20 |
| ENSMUSG0000029777  | Gars       | 9  | ENSMUSG0000071234 | Syndig1l | 9  |
| ENSMUSG0000022962  | Gart       | 20 | ENSMUSG0000096054 | Syne1    | 7  |
| ENSMUSG0000052957  | Gas1       | 20 | ENSMUSG0000063450 | Syne2    | 13 |
| ENSMUSG0000030498  | Gas2       | 20 | ENSMUSG0000054150 | Syne3    | 20 |
| ENSMUSG0000034201  | Gas2l1     | 20 | ENSMUSG0000019737 | Syne4    | 20 |
| ENSMUSG0000020686  | Gas2l2     | 13 | ENSMUSG0000067629 | Syngap1  | 9  |
| ENSMUSG0000074802  | Gas2l3     | 20 | ENSMUSG0000022415 | Syngr1   | 18 |
| ENSMUSG0000053332  | Gas5       | 12 | ENSMUSG0000048277 | Syngr2   | 20 |
| ENSMUSG0000031451  | Gas6       | 13 | ENSMUSG0000007021 | Syngr3   | 20 |
| ENSMUSG0000033066  | Gas7       | 9  | ENSMUSG0000022973 | Synj1    | 3  |
| ENSMUSG0000040220  | Gas8       | 20 | ENSMUSG0000023805 | Synj2    | 18 |
| ENSMUSG0000038233  | Gask1a     | 20 | ENSMUSG0000090935 | Synj2bp  | 12 |
| ENSMUSG0000027955  | Gask1b     | 1  | ENSMUSG0000030554 | Synm     | 18 |
| ENSMUSG0000015053  | Gata2      | 1  | ENSMUSG0000043079 | Synpo    | 9  |
| ENSMUSG0000007415  | Gatad1     | 20 | ENSMUSG0000050315 | Synpo2   | 18 |
| ENSMUSG0000036180  | Gatad2a    | 18 | ENSMUSG0000056296 | Synpr    | 9  |
| ENSMUSG0000042390  | Gatad2b    | 7  | ENSMUSG0000034940 | Synrg    | 3  |
| ENSMUSG0000028085  | Gatb       | 9  | ENSMUSG0000031144 | Syp      | 9  |
| ENSMUSG0000029536  | Gatc       | 20 | ENSMUSG0000020570 | Sypl     | 20 |
| ENSMUSG0000051007  | Gatd1      | 20 | ENSMUSG0000027887 | Sypl2    | 5  |
| ENSMUSG0000053329  | Gatd3a     | 20 | ENSMUSG0000045503 | Sys1     | 20 |
| ENSMUSG0000027199  | Gatm       | 20 | ENSMUSG0000035864 | Syt1     | 19 |
| ENSMUSG0000028048  | Gba        | 20 | ENSMUSG0000063260 | Syt10    | 9  |
| ENSMUSG0000028467  | Gba2       | 9  | ENSMUSG0000068923 | Syt11    | 20 |
| ENSMUSG0000022707  | Gbe1       | 18 | ENSMUSG0000049303 | Syt12    | 9  |
| ENSMUSG0000025224  | Gbf1       | 3  | ENSMUSG0000027220 | Syt13    | 19 |
| ENSMUSG0000026829  | Gbgt1      | 20 | ENSMUSG0000016200 | Syt14    | 9  |
| ENSMUSG0000092021  | Gbp11      | 20 | ENSMUSG0000041479 | Syt15    | 20 |
| ENSMUSG0000028270  | Gbp2       | 20 | ENSMUSG0000044912 | Syt16    | 18 |
| ENSMUSG0000028268  | Gbp3       | 20 | ENSMUSG0000058420 | Syt17    | 5  |
| ENSMUSG0000079363  | Gbp4       | 20 | ENSMUSG0000026452 | Syt2     | 18 |
| ENSMUSG00000105504 | Gbp5       | 1  | ENSMUSG0000030731 | Syt3     | 20 |
| ENSMUSG00000104713 | Gbp6       | 20 | ENSMUSG0000024261 | Syt4     | 2  |
| ENSMUSG0000040253  | Gbp7       | 20 | ENSMUSG0000004961 | Syt5     | 18 |
| ENSMUSG0000029298  | Gbp9       | 9  | ENSMUSG0000027849 | Syt6     | 6  |
| ENSMUSG0000067724  | Gbx1       | 1  | ENSMUSG0000024743 | Syt7     | 19 |
| ENSMUSG0000034486  | Gbx2       | 18 | ENSMUSG0000062542 | Syt9     | 18 |

|                   |         |    |                   |         |    |
|-------------------|---------|----|-------------------|---------|----|
| ENSMUSG0000026893 | Gca     | 1  | ENSMUSG0000030616 | Syt12   | 20 |
| ENSMUSG0000006378 | Gcat    | 20 | ENSMUSG0000031255 | Syt14   | 20 |
| ENSMUSG0000029708 | Gcc1    | 20 | ENSMUSG0000054453 | Syt15   | 9  |
| ENSMUSG0000038039 | Gcc2    | 20 | ENSMUSG0000024807 | Syvn1   | 18 |
| ENSMUSG0000003809 | Gcdh    | 20 | ENSMUSG0000040842 | Szrd1   | 20 |
| ENSMUSG0000035125 | Gcfc2   | 20 | ENSMUSG0000033253 | Szt2    | 20 |
| ENSMUSG0000037580 | Gch1    | 20 | ENSMUSG0000058159 | T2      | 20 |
| ENSMUSG0000041798 | Gck     | 10 | ENSMUSG0000022414 | Tab1    | 20 |
| ENSMUSG0000059434 | Gckr    | 6  | ENSMUSG0000015755 | Tab2    | 20 |
| ENSMUSG0000032350 | Gclc    | 20 | ENSMUSG0000035476 | Tab3    | 20 |
| ENSMUSG0000028124 | Gclm    | 20 | ENSMUSG0000061762 | Tac1    | 9  |
| ENSMUSG0000041638 | Gcn1    | 20 | ENSMUSG0000025400 | Tac2    | 17 |
| ENSMUSG0000038843 | Gcnt1   | 20 | ENSMUSG0000065954 | Tacc1   | 9  |
| ENSMUSG0000021360 | Gcnt2   | 9  | ENSMUSG0000030852 | Tacc2   | 20 |
| ENSMUSG0000091387 | Gcnt4   | 20 | ENSMUSG0000037313 | Tacc3   | 20 |
| ENSMUSG0000034424 | Gcsh    | 20 | ENSMUSG0000001983 | Taco1   | 20 |
| ENSMUSG0000058624 | Gda     | 18 | ENSMUSG0000085255 | Taco1os | 20 |
| ENSMUSG0000025777 | Gdap1   | 3  | ENSMUSG0000030043 | Tacr1   | 20 |
| ENSMUSG0000017943 | Gdap1l1 | 9  | ENSMUSG0000028172 | Tacr3   | 20 |
| ENSMUSG0000027865 | Gdap2   | 12 | ENSMUSG0000026563 | Tada1   | 20 |
| ENSMUSG0000033917 | Gde1    | 20 | ENSMUSG0000018651 | Tada2a  | 20 |
| ENSMUSG0000021943 | Gdf10   | 20 | ENSMUSG0000029196 | Tada2b  | 10 |
| ENSMUSG0000025352 | Gdf11   | 19 | ENSMUSG0000048930 | Tada3   | 20 |
| ENSMUSG0000037660 | Gdf7    | 9  | ENSMUSG0000031314 | Taf1    | 3  |
| ENSMUSG0000018238 | Gdf9    | 20 | ENSMUSG0000043866 | Taf10   | 3  |
| ENSMUSG0000015291 | Gdi1    | 1  | ENSMUSG0000024218 | Taf11   | 20 |
| ENSMUSG0000021218 | Gdi2    | 20 | ENSMUSG0000028899 | Taf12   | 20 |
| ENSMUSG0000022144 | Gdnf    | 9  | ENSMUSG0000048100 | Taf13   | 9  |
| ENSMUSG0000061666 | Gdpd1   | 20 | ENSMUSG0000020680 | Taf15   | 1  |
| ENSMUSG0000019359 | Gdpd2   | 20 | ENSMUSG0000072258 | Taf1a   | 20 |
| ENSMUSG0000030703 | Gdpd3   | 20 | ENSMUSG0000059669 | Taf1b   | 18 |
| ENSMUSG0000035314 | Gdpd5   | 5  | ENSMUSG0000031832 | Taf1c   | 19 |
| ENSMUSG0000050973 | Gdpgp1  | 9  | ENSMUSG0000031939 | Taf1d   | 20 |
| ENSMUSG0000028214 | Gem     | 20 | ENSMUSG0000037343 | Taf2    | 20 |
| ENSMUSG0000060121 | Gemin2  | 20 | ENSMUSG0000025782 | Taf3    | 20 |
| ENSMUSG0000049396 | Gemin4  | 20 | ENSMUSG0000039117 | Taf4    | 20 |
| ENSMUSG0000037275 | Gemin5  | 20 | ENSMUSG0000054321 | Taf4b   | 1  |
| ENSMUSG0000055760 | Gemin6  | 1  | ENSMUSG0000025049 | Taf5    | 20 |
| ENSMUSG0000044709 | Gemin7  | 7  | ENSMUSG0000038697 | Taf5l   | 9  |
| ENSMUSG0000040621 | Gemin8  | 20 | ENSMUSG0000036980 | Taf6    | 20 |
| ENSMUSG0000051235 | Gen1    | 20 | ENSMUSG0000003680 | Taf6l   | 20 |
| ENSMUSG0000025858 | Get4    | 20 | ENSMUSG0000051316 | Taf7    | 19 |
| ENSMUSG0000020932 | Gfap    | 16 | ENSMUSG0000023980 | Taf8    | 20 |
| ENSMUSG0000040888 | Gfer    | 20 | ENSMUSG0000052293 | Taf9    | 20 |
| ENSMUSG0000027774 | Gfm1    | 3  | ENSMUSG0000047242 | Taf9b   | 7  |
| ENSMUSG0000021666 | Gfm2    | 20 | ENSMUSG0000059187 | Tafa1   | 5  |
| ENSMUSG0000051335 | Gfod1   | 7  | ENSMUSG0000044071 | Tafa2   | 19 |
| ENSMUSG0000013150 | Gfod2   | 9  | ENSMUSG0000046500 | Tafa4   | 18 |
| ENSMUSG0000029992 | Gfpt1   | 3  | ENSMUSG0000054863 | Tafa5   | 20 |
| ENSMUSG0000020363 | Gfpt2   | 9  | ENSMUSG0000033450 | Tagap   | 20 |
| ENSMUSG0000025089 | Gfra1   | 20 | ENSMUSG0000052031 | Tagap1  | 9  |
| ENSMUSG0000022103 | Gfra2   | 18 | ENSMUSG0000032085 | Tagln   | 20 |
| ENSMUSG0000027316 | Gfra4   | 20 | ENSMUSG0000026547 | Tagln2  | 20 |
| ENSMUSG0000033128 | Gga1    | 20 | ENSMUSG0000022658 | Tagln3  | 7  |
| ENSMUSG0000030872 | Gga2    | 9  | ENSMUSG0000028717 | Tal1    | 20 |

|                   |        |    |                   |            |    |
|-------------------|--------|----|-------------------|------------|----|
| ENSMUSG0000020740 | Gga3   | 2  | ENSMUSG0000028417 | Tal2       | 20 |
| ENSMUSG0000041625 | Ggact  | 9  | ENSMUSG0000025503 | Taldo1     | 3  |
| ENSMUSG0000002797 | Ggct   | 20 | ENSMUSG0000030316 | Tamm41     | 20 |
| ENSMUSG0000073987 | Ggh    | 20 | ENSMUSG0000035168 | Tanc1      | 19 |
| ENSMUSG0000031493 | Ggn    | 20 | ENSMUSG0000053580 | Tanc2      | 7  |
| ENSMUSG0000048731 | Ggnbp1 | 14 | ENSMUSG0000041949 | Tango6     | 20 |
| ENSMUSG0000020530 | Ggnbp2 | 20 | ENSMUSG0000064289 | Tank       | 9  |
| ENSMUSG0000021302 | Ggps1  | 20 | ENSMUSG0000017291 | Taok1      | 12 |
| ENSMUSG0000006345 | Ggt1   | 20 | ENSMUSG0000059981 | Taok2      | 20 |
| ENSMUSG0000006344 | Ggt5   | 20 | ENSMUSG0000061288 | Taok3      | 8  |
| ENSMUSG0000027603 | Ggt7   | 9  | ENSMUSG0000037321 | Tap1       | 20 |
| ENSMUSG0000035778 | Ggta1  | 20 | ENSMUSG0000024339 | Tap2       | 20 |
| ENSMUSG0000017747 | Ghdc   | 20 | ENSMUSG0000024308 | Tapbp      | 20 |
| ENSMUSG0000041028 | Ghitm  | 9  | ENSMUSG0000038213 | Tapbpl     | 20 |
| ENSMUSG0000055737 | Ghr    | 20 | ENSMUSG0000046985 | Tapt1      | 20 |
| ENSMUSG0000018415 | Gid4   | 20 | ENSMUSG0000090290 | Tarbp1     | 12 |
| ENSMUSG0000027573 | Gid8   | 20 | ENSMUSG0000023051 | Tarbp2     | 12 |
| ENSMUSG0000029714 | Gigyf1 | 1  | ENSMUSG0000041459 | Tardbp     | 20 |
| ENSMUSG0000048000 | Gigyf2 | 20 | ENSMUSG0000022241 | Tars       | 20 |
| ENSMUSG0000090019 | Gimap1 | 20 | ENSMUSG0000028107 | Tars2      | 12 |
| ENSMUSG0000043505 | Gimap5 | 20 | ENSMUSG0000030515 | Tarsl2     | 9  |
| ENSMUSG0000047867 | Gimap6 | 20 | ENSMUSG0000029072 | Tas1r3     | 20 |
| ENSMUSG0000064262 | Gimap8 | 1  | ENSMUSG0000040651 | Tasor      | 2  |
| ENSMUSG0000051124 | Gimap9 | 20 | ENSMUSG0000033799 | Tasor2     | 2  |
| ENSMUSG0000026333 | Gin1   | 20 | ENSMUSG0000039033 | Tasp1      | 20 |
| ENSMUSG0000040006 | Ginm1  | 20 | ENSMUSG0000050891 | Tatdn1     | 10 |
| ENSMUSG0000027454 | Gins1  | 20 | ENSMUSG0000056952 | Tatdn2     | 13 |
| ENSMUSG0000031821 | Gins2  | 20 | ENSMUSG0000026632 | Tatdn3     | 18 |
| ENSMUSG0000031669 | Gins3  | 20 | ENSMUSG0000004535 | Tax1bp1    | 20 |
| ENSMUSG0000031546 | Gins4  | 20 | ENSMUSG0000040158 | Tax1bp3    | 20 |
| ENSMUSG0000019433 | Gipc1  | 20 | ENSMUSG0000009995 | Taz        | 20 |
| ENSMUSG0000039131 | Gipc2  | 1  | ENSMUSG0000029174 | Tbc1d1     | 19 |
| ENSMUSG0000034872 | Gipc3  | 20 | ENSMUSG0000034412 | Tbc1d10a   | 12 |
| ENSMUSG0000030406 | Gipr   | 16 | ENSMUSG0000042492 | Tbc1d10b   | 9  |
| ENSMUSG0000011877 | Git1   | 1  | ENSMUSG0000048720 | Tbc1d12    | 20 |
| ENSMUSG0000041890 | Git2   | 18 | ENSMUSG0000039678 | Tbc1d13    | 20 |
| ENSMUSG0000050953 | Gja1   | 1  | ENSMUSG0000029192 | Tbc1d14    | 9  |
| ENSMUSG0000050234 | Gja4   | 20 | ENSMUSG0000020130 | Tbc1d15    | 20 |
| ENSMUSG0000057123 | Gja5   | 20 | ENSMUSG0000039976 | Tbc1d16    | 9  |
| ENSMUSG0000055691 | Gja6   | 20 | ENSMUSG0000038520 | Tbc1d17    | 20 |
| ENSMUSG0000047797 | Gjb1   | 20 | ENSMUSG0000039178 | Tbc1d19    | 13 |
| ENSMUSG0000046352 | Gjb2   | 20 | ENSMUSG0000039813 | Tbc1d2     | 13 |
| ENSMUSG0000040055 | Gjb6   | 18 | ENSMUSG0000027465 | Tbc1d20    | 9  |
| ENSMUSG0000034520 | Gjc1   | 18 | ENSMUSG0000051864 | Tbc1d22a   | 20 |
| ENSMUSG0000043448 | Gjc2   | 16 | ENSMUSG0000042203 | Tbc1d22b   | 9  |
| ENSMUSG0000056966 | Gjc3   | 16 | ENSMUSG0000089900 | Tbc1d22bos | 20 |
| ENSMUSG0000068615 | Gjd2   | 20 | ENSMUSG0000022749 | Tbc1d23    | 20 |
| ENSMUSG0000047197 | Gjd3   | 20 | ENSMUSG0000036473 | Tbc1d24    | 19 |
| ENSMUSG0000025059 | Gk     | 20 | ENSMUSG0000039201 | Tbc1d25    | 20 |
| ENSMUSG0000041440 | Gk5    | 10 | ENSMUSG0000037410 | Tbc1d2b    | 20 |
| ENSMUSG0000021552 | Gkap1  | 7  | ENSMUSG0000052302 | Tbc1d30    | 8  |
| ENSMUSG0000030048 | Gkn3   | 20 | ENSMUSG0000022364 | Tbc1d31    | 20 |
| ENSMUSG0000031266 | Gla    | 20 | ENSMUSG0000038122 | Tbc1d32    | 20 |
| ENSMUSG0000045594 | Glb1   | 9  | ENSMUSG0000033083 | Tbc1d4     | 1  |
| ENSMUSG0000026200 | Glb1l  | 20 | ENSMUSG0000023923 | Tbc1d5     | 20 |

|                     |          |    |                     |           |    |
|---------------------|----------|----|---------------------|-----------|----|
| ENSMUSG00000036395  | Glb1l2   | 13 | ENSMUSG00000021368  | Tbc1d7    | 18 |
| ENSMUSG00000029638  | Glcci1   | 6  | ENSMUSG00000003134  | Tbc1d8    | 9  |
| ENSMUSG00000032252  | Glce     | 9  | ENSMUSG00000042473  | Tbc1d8b   | 2  |
| ENSMUSG00000024827  | Gldc     | 9  | ENSMUSG00000031709  | Tbc1d9    | 13 |
| ENSMUSG00000046167  | Gldn     | 20 | ENSMUSG00000036644  | Tbc1d9b   | 20 |
| ENSMUSG00000019715  | Gle1     | 20 | ENSMUSG00000042043  | Tbca      | 12 |
| ENSMUSG00000003316  | Glg1     | 3  | ENSMUSG00000006095  | Tbcb      | 20 |
| ENSMUSG00000025407  | Gli1     | 6  | ENSMUSG00000036430  | Tbcc      | 20 |
| ENSMUSG00000048402  | Gli2     | 20 | ENSMUSG00000004462  | Tbccd1    | 1  |
| ENSMUSG00000021318  | Gli3     | 9  | ENSMUSG00000039230  | Tbcd      | 20 |
| ENSMUSG00000056888  | Glipr1   | 9  | ENSMUSG00000039233  | Tbce      | 12 |
| ENSMUSG00000028480  | Glipr2   | 20 | ENSMUSG00000037287  | Tbcel     | 11 |
| ENSMUSG00000034762  | Glis1    | 20 | ENSMUSG00000028030  | Tbck      | 7  |
| ENSMUSG00000014303  | Glis2    | 20 | ENSMUSG00000020115  | Tbk1      | 20 |
| ENSMUSG00000052942  | Glis3    | 20 | ENSMUSG00000038517  | Tbkbp1    | 9  |
| ENSMUSG00000029276  | Glmn     | 20 | ENSMUSG00000025246  | Tbl1x     | 5  |
| ENSMUSG00000001418  | Glnp     | 20 | ENSMUSG00000027630  | Tbl1xr1   | 20 |
| ENSMUSG000000082100 | Glns-ps1 | 1  | ENSMUSG000000005374 | Tbl2      | 20 |
| ENSMUSG00000024026  | Glo1     | 18 | ENSMUSG00000040688  | Tbl3      | 20 |
| ENSMUSG00000017286  | Glod4    | 20 | ENSMUSG00000014767  | Tbp       | 20 |
| ENSMUSG00000024027  | Glp1r    | 20 | ENSMUSG00000071359  | Tbpl1     | 20 |
| ENSMUSG00000049928  | Glp2r    | 20 | ENSMUSG00000035033  | Tbr1      | 5  |
| ENSMUSG00000000263  | Glr1     | 18 | ENSMUSG00000011114  | Tbrg1     | 20 |
| ENSMUSG00000018589  | Glr2     | 20 | ENSMUSG00000000384  | Tbrg4     | 20 |
| ENSMUSG00000038257  | Glr3     | 17 | ENSMUSG00000009097  | Tbx1      | 20 |
| ENSMUSG00000028020  | Glr4     | 18 | ENSMUSG00000032419  | Tbx18     | 20 |
| ENSMUSG00000062310  | Glrp1    | 20 | ENSMUSG00000000093  | Tbx2      | 20 |
| ENSMUSG00000021591  | Glrp2    | 9  | ENSMUSG00000018604  | Tbx3      | 20 |
| ENSMUSG00000018196  | Glrp3    | 20 | ENSMUSG00000087516  | Tbx3os1   | 20 |
| ENSMUSG00000031068  | Glrp4    | 20 | ENSMUSG00000030699  | Tbx6      | 20 |
| ENSMUSG00000021102  | Glrp5    | 20 | ENSMUSG00000029925  | Tbxas1    | 20 |
| ENSMUSG00000026103  | Gls      | 3  | ENSMUSG00000021187  | Tc2n      | 13 |
| ENSMUSG00000044005  | Gls2     | 18 | ENSMUSG00000036667  | Tcaf1     | 20 |
| ENSMUSG00000049971  | Glt1d1   | 20 | ENSMUSG00000029851  | Tcaf2     | 20 |
| ENSMUSG00000021916  | Glt8d1   | 20 | ENSMUSG00000046603  | Tcaim     | 20 |
| ENSMUSG00000020251  | Glt8d2   | 5  | ENSMUSG00000033813  | Tcea1     | 20 |
| ENSMUSG00000011884  | Gltp     | 16 | ENSMUSG00000067869  | Tcea1-ps1 | 20 |
| ENSMUSG00000108799  | Glud-ps  | 20 | ENSMUSG00000059540  | Tcea2     | 20 |
| ENSMUSG00000021794  | Glud1    | 18 | ENSMUSG00000001604  | Tcea3     | 13 |
| ENSMUSG00000026473  | Glul     | 1  | ENSMUSG00000049536  | Tceal1    | 17 |
| ENSMUSG00000020258  | Glyctk   | 9  | ENSMUSG00000044550  | Tceal3    | 12 |
| ENSMUSG00000022536  | Glyr1    | 20 | ENSMUSG00000054034  | Tceal5    | 20 |
| ENSMUSG00000056771  | Gm10010  | 20 | ENSMUSG00000031409  | Tceal6    | 19 |
| ENSMUSG00000057580  | Gm10012  | 20 | ENSMUSG00000079428  | Tceal7    | 20 |
| ENSMUSG00000056943  | Gm10015  | 20 | ENSMUSG00000051579  | Tceal8    | 20 |
| ENSMUSG00000094012  | Gm10024  | 20 | ENSMUSG00000042712  | Tceal9    | 8  |
| ENSMUSG00000057802  | Gm10030  | 20 | ENSMUSG00000051224  | Tceanc    | 20 |
| ENSMUSG00000110444  | Gm10033  | 20 | ENSMUSG00000028619  | Tceanc2   | 20 |
| ENSMUSG00000058064  | Gm10036  | 12 | ENSMUSG00000024498  | Tcerg1    | 3  |
| ENSMUSG00000058246  | Gm10037  | 20 | ENSMUSG00000091002  | Tcerg1l   | 20 |
| ENSMUSG00000091478  | Gm10039  | 20 | ENSMUSG00000032228  | Tcf12     | 20 |
| ENSMUSG00000109793  | Gm10043  | 20 | ENSMUSG00000068079  | Tcf15     | 20 |
| ENSMUSG00000072723  | Gm10044  | 9  | ENSMUSG00000050410  | Tcf19     | 20 |
| ENSMUSG00000103544  | Gm10048  | 19 | ENSMUSG00000041852  | Tcf20     | 8  |
| ENSMUSG00000058905  | Gm10051  | 12 | ENSMUSG00000001472  | Tcf25     | 18 |



|                    |         |    |                    |          |    |
|--------------------|---------|----|--------------------|----------|----|
| ENSMUSG0000058922  | Gm10052 | 20 | ENSMUSG00000020167 | Tcf3     | 19 |
| ENSMUSG0000058927  | Gm10053 | 10 | ENSMUSG00000053477 | Tcf4     | 5  |
| ENSMUSG00000113368 | Gm10054 | 20 | ENSMUSG00000000782 | Tcf7     | 9  |
| ENSMUSG0000059064  | Gm10059 | 20 | ENSMUSG00000055799 | Tcf7l1   | 6  |
| ENSMUSG00000110669 | Gm10060 | 20 | ENSMUSG00000024985 | Tcf7l2   | 18 |
| ENSMUSG0000059244  | Gm10062 | 20 | ENSMUSG00000038932 | Tcf15    | 20 |
| ENSMUSG0000059659  | Gm10069 | 20 | ENSMUSG00000052415 | Tchh     | 1  |
| ENSMUSG00000060019 | Gm10073 | 3  | ENSMUSG00000002486 | Tchp     | 20 |
| ENSMUSG00000060143 | Gm10076 | 12 | ENSMUSG00000056313 | Tcim     | 20 |
| ENSMUSG00000060467 | Gm10080 | 10 | ENSMUSG00000001750 | Tcirg1   | 20 |
| ENSMUSG00000060730 | Gm10086 | 20 | ENSMUSG00000020432 | Tcn2     | 19 |
| ENSMUSG00000061062 | Gm10093 | 9  | ENSMUSG00000024613 | Tcof1    | 1  |
| ENSMUSG00000113555 | Gm10095 | 12 | ENSMUSG00000068039 | Tcp1     | 20 |
| ENSMUSG00000062038 | Gm10108 | 20 | ENSMUSG00000062859 | Tcp11    | 14 |
| ENSMUSG00000062093 | Gm10110 | 20 | ENSMUSG00000027175 | Tcp11l1  | 18 |
| ENSMUSG00000062319 | Gm10115 | 9  | ENSMUSG00000020034 | Tcp11l2  | 9  |
| ENSMUSG00000062561 | Gm10118 | 9  | ENSMUSG00000039461 | Tcta     | 20 |
| ENSMUSG00000112909 | Gm10120 | 3  | ENSMUSG00000023949 | Tcte1    | 20 |
| ENSMUSG00000062933 | Gm10123 | 12 | ENSMUSG00000038347 | Tcte2    | 9  |
| ENSMUSG00000063087 | Gm10125 | 20 | ENSMUSG00000014075 | Tctex1d2 | 20 |
| ENSMUSG00000095315 | Gm10130 | 20 | ENSMUSG00000038593 | Tctn1    | 9  |
| ENSMUSG00000063412 | Gm10131 | 2  | ENSMUSG00000029386 | Tctn2    | 13 |
| ENSMUSG00000063556 | Gm10132 | 20 | ENSMUSG00000025008 | Tctn3    | 20 |
| ENSMUSG00000063611 | Gm10134 | 20 | ENSMUSG00000034674 | Tdg      | 9  |
| ENSMUSG00000063754 | Gm10136 | 12 | ENSMUSG00000032494 | Tdgf1    | 20 |
| ENSMUSG00000100954 | Gm10138 | 20 | ENSMUSG00000021177 | Tdp1     | 20 |
| ENSMUSG00000064208 | Gm10145 | 20 | ENSMUSG00000035958 | Tdp2     | 20 |
| ENSMUSG00000064317 | Gm10146 | 12 | ENSMUSG00000025081 | Tdrd1    | 12 |
| ENSMUSG00000066116 | Gm10154 | 20 | ENSMUSG00000030491 | Tdrd12   | 20 |
| ENSMUSG00000066180 | Gm10155 | 20 | ENSMUSG00000022019 | Tdrd3    | 20 |
| ENSMUSG00000066245 | Gm10156 | 20 | ENSMUSG00000060985 | Tdrd5    | 9  |
| ENSMUSG00000066270 | Gm10157 | 20 | ENSMUSG00000040140 | Tdrd6    | 20 |
| ENSMUSG00000066554 | Gm10167 | 20 | ENSMUSG00000035517 | Tdrd7    | 20 |
| ENSMUSG00000083669 | Gm10169 | 20 | ENSMUSG00000054003 | Tdrd9    | 20 |
| ENSMUSG00000089803 | Gm10171 | 3  | ENSMUSG00000041912 | Tdrkh    | 20 |
| ENSMUSG00000066724 | Gm10175 | 12 | ENSMUSG00000050052 | Tdrp     | 9  |
| ENSMUSG00000066752 | Gm10176 | 20 | ENSMUSG00000055320 | Tead1    | 20 |
| ENSMUSG00000090136 | Gm10177 | 10 | ENSMUSG00000030796 | Tead2    | 20 |
| ENSMUSG00000066807 | Gm10179 | 11 | ENSMUSG00000002249 | Tead3    | 20 |
| ENSMUSG00000066809 | Gm10180 | 18 | ENSMUSG00000030353 | Tead4    | 20 |
| ENSMUSG00000066878 | Gm10184 | 20 | ENSMUSG00000029217 | Tec      | 20 |
| ENSMUSG00000067719 | Gm10221 | 7  | ENSMUSG00000066621 | Tecpr1   | 20 |
| ENSMUSG00000067736 | Gm10222 | 20 | ENSMUSG00000021275 | Tecpr2   | 20 |
| ENSMUSG00000080932 | Gm10224 | 20 | ENSMUSG00000031708 | Tecr     | 2  |
| ENSMUSG00000067929 | Gm10226 | 20 | ENSMUSG00000037705 | Tecta    | 20 |
| ENSMUSG00000068120 | Gm10231 | 19 | ENSMUSG00000037466 | Tedc1    | 18 |
| ENSMUSG00000068141 | Gm10232 | 19 | ENSMUSG00000024118 | Tedc2    | 20 |
| ENSMUSG00000068397 | Gm10240 | 20 | ENSMUSG00000045968 | Teddm2   | 1  |
| ENSMUSG00000084838 | Gm10241 | 20 | ENSMUSG00000022389 | Tef      | 1  |
| ENSMUSG00000095526 | Gm10243 | 12 | ENSMUSG00000046909 | Tefm     | 20 |
| ENSMUSG00000068674 | Gm10247 | 20 | ENSMUSG00000006386 | Tek      | 20 |
| ENSMUSG00000068706 | Gm10250 | 12 | ENSMUSG00000020799 | Tekt1    | 13 |
| ENSMUSG00000104333 | Gm10253 | 20 | ENSMUSG00000028845 | Tekt2    | 1  |
| ENSMUSG00000069011 | Gm10254 | 20 | ENSMUSG00000024175 | Tekt4    | 20 |
| ENSMUSG00000114759 | Gm10257 | 20 | ENSMUSG00000039179 | Tekt5    | 20 |

|                    |         |    |                    |         |    |
|--------------------|---------|----|--------------------|---------|----|
| ENSMUSG0000069117  | Gm10260 | 11 | ENSMUSG00000024170 | Telo2   | 9  |
| ENSMUSG0000066407  | Gm10263 | 11 | ENSMUSG00000020778 | Ten1    | 12 |
| ENSMUSG0000066475  | Gm10268 | 18 | ENSMUSG00000016150 | Tenm1   | 9  |
| ENSMUSG0000091449  | Gm10269 | 12 | ENSMUSG00000049336 | Tenm2   | 20 |
| ENSMUSG0000069622  | Gm10273 | 20 | ENSMUSG00000031561 | Tenm3   | 12 |
| ENSMUSG0000069682  | Gm10275 | 12 | ENSMUSG00000048078 | Tenm4   | 20 |
| ENSMUSG0000070713  | Gm10282 | 20 | ENSMUSG00000042167 | Tent2   | 9  |
| ENSMUSG0000070025  | Gm10284 | 9  | ENSMUSG00000034575 | Tent4a  | 20 |
| ENSMUSG0000070342  | Gm10287 | 6  | ENSMUSG00000036779 | Tent4b  | 1  |
| ENSMUSG0000070343  | Gm10288 | 12 | ENSMUSG00000032265 | Tent5a  | 20 |
| ENSMUSG00000105775 | Gm10290 | 20 | ENSMUSG00000044468 | Tent5c  | 12 |
| ENSMUSG0000070443  | Gm10291 | 20 | ENSMUSG00000006281 | Tep1    | 20 |
| ENSMUSG00000102846 | Gm10292 | 20 | ENSMUSG00000025377 | Tepsin  | 20 |
| ENSMUSG0000070490  | Gm10293 | 20 | ENSMUSG00000052616 | Terb1   | 20 |
| ENSMUSG00000109222 | Gm10297 | 9  | ENSMUSG00000025925 | Terf1   | 19 |
| ENSMUSG00000104479 | Gm10305 | 20 | ENSMUSG00000031921 | Terf2   | 20 |
| ENSMUSG00000071102 | Gm10313 | 20 | ENSMUSG00000033430 | Terf2ip | 20 |
| ENSMUSG00000071195 | Gm10318 | 20 | ENSMUSG00000021611 | Tert    | 20 |
| ENSMUSG00000071343 | Gm10327 | 20 | ENSMUSG00000029552 | Tes     | 20 |
| ENSMUSG00000071532 | Gm10335 | 12 | ENSMUSG00000113255 | Tes3-ps | 9  |
| ENSMUSG00000071586 | Gm10337 | 20 | ENSMUSG00000029359 | Tesc    | 9  |
| ENSMUSG00000071671 | Gm10343 | 20 | ENSMUSG00000028458 | Tesk1   | 20 |
| ENSMUSG00000114220 | Gm10353 | 10 | ENSMUSG00000033985 | Tesk2   | 20 |
| ENSMUSG00000072387 | Gm10356 | 20 | ENSMUSG00000047146 | Tet1    | 20 |
| ENSMUSG00000094708 | Gm10359 | 20 | ENSMUSG00000040943 | Tet2    | 2  |
| ENSMUSG00000116174 | Gm10362 | 20 | ENSMUSG00000034832 | Tet3    | 7  |
| ENSMUSG00000115767 | Gm10366 | 20 | ENSMUSG00000028345 | Tex10   | 20 |
| ENSMUSG00000107456 | Gm10400 | 20 | ENSMUSG00000009670 | Tex11   | 16 |
| ENSMUSG00000114266 | Gm10403 | 20 | ENSMUSG00000010342 | Tex14   | 19 |
| ENSMUSG00000105044 | Gm10416 | 20 | ENSMUSG00000009628 | Tex15   | 19 |
| ENSMUSG00000072769 | Gm10419 | 9  | ENSMUSG00000040548 | Tex2    | 20 |
| ENSMUSG00000072789 | Gm10420 | 20 | ENSMUSG00000029660 | Tex26   | 20 |
| ENSMUSG00000099907 | Gm10421 | 9  | ENSMUSG00000014748 | Tex261  | 20 |
| ENSMUSG00000117286 | Gm1043  | 1  | ENSMUSG00000040813 | Tex264  | 3  |
| ENSMUSG00000113679 | Gm10432 | 20 | ENSMUSG00000026049 | Tex30   | 1  |
| ENSMUSG00000072902 | Gm10435 | 20 | ENSMUSG00000026592 | Tex35   | 20 |
| ENSMUSG00000072940 | Gm10443 | 10 | ENSMUSG00000079304 | Tex52   | 20 |
| ENSMUSG00000073000 | Gm10451 | 1  | ENSMUSG00000090626 | Tex9    | 13 |
| ENSMUSG00000113707 | Gm10457 | 20 | ENSMUSG00000003923 | Tfam    | 20 |
| ENSMUSG00000107277 | Gm10461 | 20 | ENSMUSG00000005718 | Tfap4   | 20 |
| ENSMUSG00000073179 | Gm10478 | 20 | ENSMUSG00000036983 | Tfb1m   | 20 |
| ENSMUSG00000105864 | Gm10484 | 20 | ENSMUSG00000026492 | Tfb2m   | 20 |
| ENSMUSG00000073367 | Gm10493 | 9  | ENSMUSG00000009733 | Tfcp2   | 19 |
| ENSMUSG00000073415 | Gm10501 | 1  | ENSMUSG00000026380 | Tfcp2l1 | 9  |
| ENSMUSG00000073448 | Gm10509 | 20 | ENSMUSG00000038482 | Tfdp1   | 9  |
| ENSMUSG00000097316 | Gm10516 | 20 | ENSMUSG00000032411 | Tfdp2   | 9  |
| ENSMUSG00000073492 | Gm10521 | 20 | ENSMUSG00000000134 | Tfe3    | 20 |
| ENSMUSG00000097141 | Gm10524 | 20 | ENSMUSG00000023990 | Tfeb    | 20 |
| ENSMUSG00000073528 | Gm10530 | 20 | ENSMUSG00000022757 | Tfg     | 9  |
| ENSMUSG00000073594 | Gm10545 | 20 | ENSMUSG00000029345 | Tfip11  | 20 |
| ENSMUSG00000073607 | Gm10548 | 20 | ENSMUSG00000027082 | Tfpi    | 20 |
| ENSMUSG00000073647 | Gm10557 | 20 | ENSMUSG00000006335 | Tfpt    | 20 |
| ENSMUSG00000073656 | Gm10558 | 20 | ENSMUSG00000029716 | Tfr2    | 20 |
| ENSMUSG00000097649 | Gm10561 | 20 | ENSMUSG00000022797 | Tfrc    | 20 |
| ENSMUSG00000073737 | Gm10566 | 9  | ENSMUSG00000022130 | Tgds    | 20 |

|                    |         |    |                    |          |    |
|--------------------|---------|----|--------------------|----------|----|
| ENSMUSG00000102348 | Gm10568 | 18 | ENSMUSG00000029999 | Tgfa     | 9  |
| ENSMUSG00000073752 | Gm10570 | 20 | ENSMUSG00000002603 | Tgfb1    | 20 |
| ENSMUSG00000073753 | Gm10571 | 20 | ENSMUSG00000030782 | Tgfb1i1  | 16 |
| ENSMUSG00000073787 | Gm10575 | 20 | ENSMUSG00000039239 | Tgfb2    | 20 |
| ENSMUSG00000073985 | Gm10602 | 20 | ENSMUSG00000021253 | Tgfb3    | 20 |
| ENSMUSG00000097974 | Gm10605 | 9  | ENSMUSG00000035493 | Tgfbi    | 20 |
| ENSMUSG00000111197 | Gm10608 | 20 | ENSMUSG00000007613 | Tgfbr1   | 20 |
| ENSMUSG00000108599 | Gm10616 | 20 | ENSMUSG00000032440 | Tgfbr2   | 20 |
| ENSMUSG00000074113 | Gm10629 | 20 | ENSMUSG00000029287 | Tgfbr3   | 1  |
| ENSMUSG00000074178 | Gm10638 | 20 | ENSMUSG00000089736 | Tgfbr3l  | 20 |
| ENSMUSG00000074213 | Gm10642 | 20 | ENSMUSG00000070939 | Tgfbrap1 | 19 |
| ENSMUSG00000074215 | Gm10643 | 20 | ENSMUSG00000047407 | Tgif1    | 20 |
| ENSMUSG00000074219 | Gm10644 | 20 | ENSMUSG00000062175 | Tgif2    | 20 |
| ENSMUSG00000074228 | Gm10645 | 20 | ENSMUSG00000037820 | Tgm2     | 20 |
| ENSMUSG00000074232 | Gm10647 | 20 | ENSMUSG00000025787 | Tgm4     | 20 |
| ENSMUSG00000074235 | Gm10649 | 20 | ENSMUSG00000079103 | Tgm7     | 20 |
| ENSMUSG00000074243 | Gm10651 | 20 | ENSMUSG00000056429 | Tgoln1   | 9  |
| ENSMUSG00000074252 | Gm10654 | 20 | ENSMUSG00000028233 | Tgs1     | 20 |
| ENSMUSG00000103486 | Gm10657 | 6  | ENSMUSG00000000214 | Th       | 17 |
| ENSMUSG00000074355 | Gm10676 | 20 | ENSMUSG00000017713 | Tha1     | 20 |
| ENSMUSG00000074385 | Gm10684 | 18 | ENSMUSG00000024251 | Thada    | 12 |
| ENSMUSG00000097617 | Gm10687 | 20 | ENSMUSG00000037214 | Thap1    | 20 |
| ENSMUSG00000074412 | Gm10689 | 20 | ENSMUSG00000036442 | Thap11   | 20 |
| ENSMUSG00000079884 | Gm10698 | 20 | ENSMUSG00000030753 | Thap12   | 20 |
| ENSMUSG00000074461 | Gm10699 | 20 | ENSMUSG00000020137 | Thap2    | 20 |
| ENSMUSG00000074467 | Gm10702 | 20 | ENSMUSG00000039759 | Thap3    | 20 |
| ENSMUSG00000074506 | Gm10705 | 20 | ENSMUSG00000026279 | Thap4    | 20 |
| ENSMUSG00000074508 | Gm10706 | 9  | ENSMUSG00000102644 | Thap6    | 20 |
| ENSMUSG00000074516 | Gm10709 | 10 | ENSMUSG00000022760 | Thap7    | 20 |
| ENSMUSG00000074517 | Gm10710 | 20 | ENSMUSG00000074743 | Thbd     | 12 |
| ENSMUSG00000103345 | Gm10723 | 19 | ENSMUSG00000040152 | Thbs1    | 20 |
| ENSMUSG00000103701 | Gm10728 | 1  | ENSMUSG00000023885 | Thbs2    | 9  |
| ENSMUSG00000096842 | Gm10736 | 12 | ENSMUSG00000028047 | Thbs3    | 3  |
| ENSMUSG00000074776 | Gm10754 | 9  | ENSMUSG00000021702 | Thbs4    | 1  |
| ENSMUSG00000074807 | Gm10762 | 20 | ENSMUSG00000020317 | Theg     | 1  |
| ENSMUSG00000074826 | Gm10767 | 20 | ENSMUSG00000028145 | Them4    | 20 |
| ENSMUSG00000096856 | Gm10778 | 20 | ENSMUSG00000056665 | Them6    | 2  |
| ENSMUSG00000085169 | Gm10785 | 20 | ENSMUSG00000037731 | Themis2  | 20 |
| ENSMUSG00000113856 | Gm10790 | 20 | ENSMUSG00000011254 | Thg1l    | 20 |
| ENSMUSG00000115518 | Gm10791 | 20 | ENSMUSG00000048550 | Thnsl1   | 20 |
| ENSMUSG00000075014 | Gm10800 | 20 | ENSMUSG00000054474 | Thnsl2   | 20 |
| ENSMUSG00000075015 | Gm10801 | 20 | ENSMUSG00000024287 | Thoc1    | 20 |
| ENSMUSG00000097404 | Gm10814 | 1  | ENSMUSG00000037475 | Thoc2    | 2  |
| ENSMUSG00000117710 | Gm10817 | 20 | ENSMUSG00000025872 | Thoc3    | 12 |
| ENSMUSG00000075268 | Gm10819 | 20 | ENSMUSG00000034274 | Thoc5    | 20 |
| ENSMUSG00000096977 | Gm10827 | 12 | ENSMUSG00000041319 | Thoc6    | 20 |
| ENSMUSG00000075525 | Gm10849 | 1  | ENSMUSG00000053453 | Thoc7    | 9  |
| ENSMUSG00000075538 | Gm10855 | 7  | ENSMUSG00000004929 | Thop1    | 3  |
| ENSMUSG00000104284 | Gm10862 | 3  | ENSMUSG00000022847 | Thpo     | 20 |
| ENSMUSG00000075555 | Gm10863 | 1  | ENSMUSG00000058756 | Thra     | 9  |
| ENSMUSG00000078097 | Gm10913 | 20 | ENSMUSG00000043962 | Thrap3   | 1  |
| ENSMUSG00000100862 | Gm10925 | 18 | ENSMUSG00000021779 | Thrb     | 20 |
| ENSMUSG00000113792 | Gm10933 | 20 | ENSMUSG00000035686 | Thrsp    | 9  |
| ENSMUSG00000108926 | Gm10988 | 20 | ENSMUSG00000031480 | Thsd1    | 1  |
| ENSMUSG00000109879 | Gm10997 | 9  | ENSMUSG00000032289 | Thsd4    | 20 |

|                    |         |    |                    |          |    |
|--------------------|---------|----|--------------------|----------|----|
| ENSMUSG00000094475 | Gm11007 | 20 | ENSMUSG00000032625 | Thsd7a   | 7  |
| ENSMUSG00000079414 | Gm11110 | 20 | ENSMUSG00000042581 | Thsd7b   | 20 |
| ENSMUSG00000079564 | Gm11149 | 20 | ENSMUSG00000045691 | Thtpa    | 20 |
| ENSMUSG00000083245 | Gm11185 | 9  | ENSMUSG00000030942 | Thumpd1  | 9  |
| ENSMUSG00000058073 | Gm11189 | 20 | ENSMUSG00000024246 | Thumpd2  | 20 |
| ENSMUSG00000055045 | Gm11190 | 1  | ENSMUSG00000030264 | Thumpd3  | 20 |
| ENSMUSG00000082110 | Gm11196 | 20 | ENSMUSG00000032011 | Thy1     | 9  |
| ENSMUSG00000084969 | Gm11205 | 10 | ENSMUSG00000035443 | Thyn1    | 18 |
| ENSMUSG00000082998 | Gm11221 | 20 | ENSMUSG00000071337 | Tia1     | 2  |
| ENSMUSG00000085627 | Gm11222 | 20 | ENSMUSG00000115568 | Tiaf2    | 20 |
| ENSMUSG00000046341 | Gm11223 | 20 | ENSMUSG00000030846 | Tial1    | 20 |
| ENSMUSG00000082432 | Gm11231 | 20 | ENSMUSG00000002489 | Tiam1    | 20 |
| ENSMUSG00000083372 | Gm11235 | 18 | ENSMUSG00000023800 | Tiam2    | 9  |
| ENSMUSG00000081936 | Gm11244 | 20 | ENSMUSG00000047123 | Ticam1   | 1  |
| ENSMUSG00000083087 | Gm11249 | 20 | ENSMUSG00000056130 | Ticam2   | 20 |
| ENSMUSG00000083496 | Gm11263 | 12 | ENSMUSG00000033191 | Tie1     | 20 |
| ENSMUSG00000087413 | Gm11266 | 20 | ENSMUSG00000046688 | Tifa     | 19 |
| ENSMUSG00000079941 | Gm11273 | 12 | ENSMUSG00000049625 | Tifab    | 20 |
| ENSMUSG00000085603 | Gm11346 | 20 | ENSMUSG00000038028 | Tigar    | 1  |
| ENSMUSG00000060198 | Gm11353 | 20 | ENSMUSG00000049232 | Tigd2    | 20 |
| ENSMUSG00000113061 | Gm11361 | 20 | ENSMUSG00000044390 | Tigd3    | 20 |
| ENSMUSG00000082861 | Gm11362 | 20 | ENSMUSG00000103906 | Tigd5    | 9  |
| ENSMUSG00000081208 | Gm11400 | 20 | ENSMUSG00000039994 | Timeless | 13 |
| ENSMUSG00000082553 | Gm11404 | 20 | ENSMUSG00000027076 | Timm10   | 20 |
| ENSMUSG00000083767 | Gm11405 | 9  | ENSMUSG00000089847 | Timm10b  | 20 |
| ENSMUSG00000082179 | Gm11407 | 18 | ENSMUSG00000020219 | Timm13   | 3  |
| ENSMUSG00000073130 | Gm1141  | 20 | ENSMUSG00000062580 | Timm17a  | 20 |
| ENSMUSG00000084996 | Gm11419 | 20 | ENSMUSG00000031158 | Timm17b  | 20 |
| ENSMUSG00000085175 | Gm11423 | 20 | ENSMUSG00000024645 | Timm21   | 20 |
| ENSMUSG00000083876 | Gm11439 | 20 | ENSMUSG00000020843 | Timm22   | 18 |
| ENSMUSG00000082917 | Gm11440 | 20 | ENSMUSG00000013701 | Timm23   | 20 |
| ENSMUSG00000083567 | Gm11451 | 20 | ENSMUSG00000048429 | Timm29   | 1  |
| ENSMUSG00000085538 | Gm11455 | 20 | ENSMUSG00000002949 | Timm44   | 3  |
| ENSMUSG00000081946 | Gm11472 | 20 | ENSMUSG00000003438 | Timm50   | 20 |
| ENSMUSG00000083992 | Gm11478 | 3  | ENSMUSG00000048007 | Timm8a1  | 20 |
| ENSMUSG00000081871 | Gm11488 | 20 | ENSMUSG00000039016 | Timm8b   | 12 |
| ENSMUSG00000084411 | Gm11510 | 20 | ENSMUSG00000021079 | Timm9    | 20 |
| ENSMUSG00000083268 | Gm11511 | 20 | ENSMUSG00000002846 | Timmcdc1 | 20 |
| ENSMUSG00000081604 | Gm11518 | 20 | ENSMUSG00000017466 | Timp2    | 9  |
| ENSMUSG00000085143 | Gm11520 | 20 | ENSMUSG00000020044 | Timp3    | 20 |
| ENSMUSG00000083337 | Gm11539 | 12 | ENSMUSG00000030317 | Timp4    | 4  |
| ENSMUSG00000085051 | Gm11542 | 18 | ENSMUSG00000028776 | Tinagl1  | 20 |
| ENSMUSG00000085007 | Gm11549 | 20 | ENSMUSG00000007589 | Tinf2    | 20 |
| ENSMUSG00000082900 | Gm11557 | 20 | ENSMUSG00000034640 | Tiparp   | 20 |
| ENSMUSG00000086688 | Gm11560 | 19 | ENSMUSG00000032397 | Tipin    | 20 |
| ENSMUSG00000085262 | Gm11574 | 20 | ENSMUSG00000040843 | Tiprl    | 20 |
| ENSMUSG00000082160 | Gm11578 | 20 | ENSMUSG00000032041 | Tirap    | 20 |
| ENSMUSG00000086680 | Gm11592 | 20 | ENSMUSG00000012296 | Tjap1    | 20 |
| ENSMUSG00000082456 | Gm11598 | 20 | ENSMUSG00000030516 | Tjp1     | 20 |
| ENSMUSG00000081643 | Gm11605 | 20 | ENSMUSG00000024812 | Tjp2     | 20 |
| ENSMUSG00000087042 | Gm11611 | 20 | ENSMUSG00000034917 | Tjp3     | 13 |
| ENSMUSG00000085586 | Gm11613 | 20 | ENSMUSG00000035824 | Tk2      | 20 |
| ENSMUSG00000081965 | Gm11620 | 20 | ENSMUSG00000034371 | Tkfc     | 20 |
| ENSMUSG00000078640 | Gm11627 | 1  | ENSMUSG00000021957 | Tkt      | 6  |
| ENSMUSG00000082487 | Gm11628 | 19 | ENSMUSG00000019437 | Tlcd1    | 20 |

|                    |         |    |                   |         |    |
|--------------------|---------|----|-------------------|---------|----|
| ENSMUSG0000082715  | Gm11633 | 20 | ENSMUSG0000038217 | Tlcd2   | 20 |
| ENSMUSG0000040838  | Gm11639 | 19 | ENSMUSG0000008305 | Tle1    | 9  |
| ENSMUSG0000086794  | Gm11642 | 20 | ENSMUSG0000034771 | Tle2    | 6  |
| ENSMUSG0000080895  | Gm11645 | 20 | ENSMUSG0000032280 | Tle3    | 20 |
| ENSMUSG0000087184  | Gm11650 | 20 | ENSMUSG0000024642 | Tle4    | 9  |
| ENSMUSG0000083465  | Gm11652 | 20 | ENSMUSG0000054452 | Tle5    | 6  |
| ENSMUSG0000081270  | Gm11653 | 20 | ENSMUSG0000034758 | Tle6    | 20 |
| ENSMUSG0000082706  | Gm11663 | 20 | ENSMUSG0000041997 | Tlk1    | 9  |
| ENSMUSG0000075437  | Gm11681 | 20 | ENSMUSG0000020694 | Tlk2    | 19 |
| ENSMUSG0000056687  | Gm11696 | 20 | ENSMUSG0000053626 | Tll1    | 20 |
| ENSMUSG0000083394  | Gm11703 | 20 | ENSMUSG0000025013 | Tll2    | 20 |
| ENSMUSG0000086442  | Gm11722 | 20 | ENSMUSG0000028465 | Tln1    | 20 |
| ENSMUSG0000080810  | Gm11737 | 20 | ENSMUSG0000052698 | Tln2    | 12 |
| ENSMUSG0000084306  | Gm11743 | 20 | ENSMUSG0000070462 | Tlnrd1  | 9  |
| ENSMUSG0000084052  | Gm11745 | 20 | ENSMUSG0000044827 | Tlr1    | 20 |
| ENSMUSG0000084887  | Gm11749 | 20 | ENSMUSG0000062545 | Tlr12   | 20 |
| ENSMUSG0000085548  | Gm11753 | 20 | ENSMUSG0000033777 | Tlr13   | 20 |
| ENSMUSG0000086547  | Gm11755 | 20 | ENSMUSG0000027995 | Tlr2    | 20 |
| ENSMUSG0000081048  | Gm11760 | 20 | ENSMUSG0000031639 | Tlr3    | 20 |
| ENSMUSG0000085207  | Gm11767 | 19 | ENSMUSG0000039005 | Tlr4    | 3  |
| ENSMUSG0000085636  | Gm11769 | 20 | ENSMUSG0000079164 | Tlr5    | 20 |
| ENSMUSG0000085501  | Gm11772 | 20 | ENSMUSG0000044583 | Tlr7    | 20 |
| ENSMUSG0000068240  | Gm11808 | 12 | ENSMUSG0000045322 | Tlr9    | 20 |
| ENSMUSG0000084215  | Gm11814 | 12 | ENSMUSG0000028563 | Tm2d1   | 20 |
| ENSMUSG0000083328  | Gm11826 | 20 | ENSMUSG0000031556 | Tm2d2   | 12 |
| ENSMUSG0000081239  | Gm11836 | 12 | ENSMUSG0000078681 | Tm2d3   | 2  |
| ENSMUSG0000086587  | Gm11837 | 20 | ENSMUSG0000027800 | Tm4sf1  | 14 |
| ENSMUSG0000083246  | Gm11839 | 20 | ENSMUSG0000038623 | Tm6sf1  | 18 |
| ENSMUSG0000081593  | Gm11841 | 20 | ENSMUSG0000036151 | Tm6sf2  | 20 |
| ENSMUSG0000060989  | Gm11847 | 20 | ENSMUSG0000024799 | Tm7sf2  | 20 |
| ENSMUSG0000081026  | Gm11855 | 20 | ENSMUSG0000040234 | Tm7sf3  | 20 |
| ENSMUSG0000050550  | Gm11868 | 1  | ENSMUSG0000002320 | Tm9sf1  | 20 |
| ENSMUSG0000084408  | Gm11870 | 20 | ENSMUSG0000025544 | Tm9sf2  | 1  |
| ENSMUSG0000086017  | Gm11872 | 20 | ENSMUSG0000025016 | Tm9sf3  | 3  |
| ENSMUSG0000082876  | Gm11889 | 20 | ENSMUSG0000068040 | Tm9sf4  | 20 |
| ENSMUSG0000084179  | Gm11890 | 20 | ENSMUSG0000025591 | Tma16   | 20 |
| ENSMUSG0000085885  | Gm11906 | 20 | ENSMUSG0000091537 | Tma7    | 10 |
| ENSMUSG0000082674  | Gm11914 | 20 | ENSMUSG0000059058 | Tma7-ps | 20 |
| ENSMUSG0000087692  | Gm11940 | 20 | ENSMUSG0000006301 | Tmbim1  | 16 |
| ENSMUSG0000094344  | Gm11942 | 2  | ENSMUSG0000020225 | Tmbim4  | 20 |
| ENSMUSG0000084941  | Gm11944 | 10 | ENSMUSG0000023010 | Tmbim6  | 20 |
| ENSMUSG0000081059  | Gm11945 | 20 | ENSMUSG0000038540 | Tmc3    | 1  |
| ENSMUSG0000087055  | Gm11948 | 20 | ENSMUSG0000019734 | Tmc4    | 20 |
| ENSMUSG0000082816  | Gm11953 | 20 | ENSMUSG0000025572 | Tmc6    | 9  |
| ENSMUSG0000084170  | Gm11954 | 9  | ENSMUSG0000042246 | Tmc7    | 4  |
| ENSMUSG0000081021  | Gm11964 | 20 | ENSMUSG0000050106 | Tmc8    | 20 |
| ENSMUSG0000080904  | Gm11966 | 20 | ENSMUSG0000030126 | Tmcc1   | 20 |
| ENSMUSG0000083209  | Gm11969 | 1  | ENSMUSG0000042066 | Tmcc2   | 18 |
| ENSMUSG0000086839  | Gm11973 | 20 | ENSMUSG0000020023 | Tmcc3   | 15 |
| ENSMUSG0000083819  | Gm11977 | 20 | ENSMUSG0000086269 | Tmcc3os | 18 |
| ENSMUSG0000040978  | Gm11992 | 1  | ENSMUSG0000052428 | Tmco1   | 12 |
| ENSMUSG00000101841 | Gm11993 | 20 | ENSMUSG0000038497 | Tmco3   | 20 |
| ENSMUSG0000081631  | Gm12005 | 20 | ENSMUSG0000041143 | Tmco4   | 20 |
| ENSMUSG0000084183  | Gm12009 | 20 | ENSMUSG0000027355 | Tmco5   | 20 |
| ENSMUSG0000078965  | Gm12033 | 12 | ENSMUSG0000041255 | Tmco5b  | 20 |

|                    |         |    |                    |           |    |
|--------------------|---------|----|--------------------|-----------|----|
| ENSMUSG0000084048  | Gm12042 | 20 | ENSMUSG0000006850  | Tmco6     | 20 |
| ENSMUSG0000084081  | Gm12057 | 20 | ENSMUSG00000032180 | Tmed1     | 12 |
| ENSMUSG0000082576  | Gm12058 | 20 | ENSMUSG00000021248 | Tmed10    | 13 |
| ENSMUSG0000085665  | Gm12059 | 20 | ENSMUSG00000114251 | Tmed10-ps | 20 |
| ENSMUSG0000085167  | Gm12063 | 18 | ENSMUSG00000029390 | Tmed2     | 20 |
| ENSMUSG0000069939  | Gm12070 | 20 | ENSMUSG00000032353 | Tmed3     | 20 |
| ENSMUSG0000084064  | Gm12079 | 20 | ENSMUSG00000004394 | Tmed4     | 20 |
| ENSMUSG0000085165  | Gm12089 | 20 | ENSMUSG00000063406 | Tmed5     | 19 |
| ENSMUSG0000081712  | Gm12096 | 9  | ENSMUSG00000033184 | Tmed7     | 7  |
| ENSMUSG0000081887  | Gm12097 | 20 | ENSMUSG00000034111 | Tmed8     | 1  |
| ENSMUSG0000082078  | Gm12098 | 1  | ENSMUSG00000058569 | Tmed9     | 3  |
| ENSMUSG0000083990  | Gm12101 | 20 | ENSMUSG00000028347 | Tmeff1    | 9  |
| ENSMUSG0000084146  | Gm12104 | 20 | ENSMUSG00000026109 | Tmeff2    | 10 |
| ENSMUSG0000081254  | Gm12112 | 20 | ENSMUSG00000069763 | Tmem100   | 20 |
| ENSMUSG0000099902  | Gm12115 | 20 | ENSMUSG00000020921 | Tmem101   | 20 |
| ENSMUSG0000098456  | Gm12117 | 20 | ENSMUSG00000045980 | Tmem104   | 20 |
| ENSMUSG0000086311  | Gm12122 | 20 | ENSMUSG00000034947 | Tmem106a  | 20 |
| ENSMUSG0000082087  | Gm12138 | 2  | ENSMUSG00000029571 | Tmem106b  | 20 |
| ENSMUSG0000081251  | Gm12164 | 12 | ENSMUSG00000052369 | Tmem106c  | 2  |
| ENSMUSG0000069899  | Gm12166 | 20 | ENSMUSG00000020895 | Tmem107   | 3  |
| ENSMUSG0000082530  | Gm12168 | 20 | ENSMUSG00000042757 | Tmem108   | 18 |
| ENSMUSG0000080776  | Gm12174 | 12 | ENSMUSG00000034659 | Tmem109   | 3  |
| ENSMUSG0000081952  | Gm12178 | 20 | ENSMUSG00000043284 | Tmem11    | 20 |
| ENSMUSG0000083460  | Gm12182 | 20 | ENSMUSG00000010045 | Tmem115   | 20 |
| ENSMUSG0000082454  | Gm12183 | 18 | ENSMUSG00000029452 | Tmem116   | 1  |
| ENSMUSG0000078154  | Gm12184 | 20 | ENSMUSG00000063296 | Tmem117   | 9  |
| ENSMUSG0000083061  | Gm12191 | 7  | ENSMUSG00000054675 | Tmem119   | 20 |
| ENSMUSG0000084302  | Gm12194 | 20 | ENSMUSG00000039886 | Tmem120a  | 20 |
| ENSMUSG0000085564  | Gm12198 | 18 | ENSMUSG00000054434 | Tmem120b  | 20 |
| ENSMUSG0000086920  | Gm12207 | 20 | ENSMUSG00000049036 | Tmem121   | 13 |
| ENSMUSG0000085707  | Gm12212 | 20 | ENSMUSG00000094626 | Tmem121b  | 9  |
| ENSMUSG0000081769  | Gm12216 | 20 | ENSMUSG00000050912 | Tmem123   | 20 |
| ENSMUSG0000078151  | Gm12226 | 20 | ENSMUSG00000050854 | Tmem125   | 20 |
| ENSMUSG0000082503  | Gm12229 | 20 | ENSMUSG00000030615 | Tmem126a  | 20 |
| ENSMUSG0000044751  | Gm12231 | 20 | ENSMUSG00000030614 | Tmem126b  | 13 |
| ENSMUSG0000086020  | Gm12239 | 20 | ENSMUSG00000034850 | Tmem127   | 12 |
| ENSMUSG0000084384  | Gm12251 | 20 | ENSMUSG00000067365 | Tmem128   | 12 |
| ENSMUSG0000085342  | Gm12254 | 20 | ENSMUSG00000019295 | Tmem129   | 20 |
| ENSMUSG0000072915  | Gm12258 | 20 | ENSMUSG00000043388 | Tmem130   | 17 |
| ENSMUSG0000080152  | Gm12260 | 20 | ENSMUSG00000026116 | Tmem131   | 18 |
| ENSMUSG0000084145  | Gm12263 | 5  | ENSMUSG00000033767 | Tmem131l  | 1  |
| ENSMUSG0000081944  | Gm12276 | 20 | ENSMUSG00000024736 | Tmem132a  | 3  |
| ENSMUSG0000087120  | Gm12279 | 20 | ENSMUSG00000070498 | Tmem132b  | 7  |
| ENSMUSG0000081600  | Gm12286 | 20 | ENSMUSG00000034324 | Tmem132c  | 18 |
| ENSMUSG0000083935  | Gm12294 | 20 | ENSMUSG00000034310 | Tmem132d  | 1  |
| ENSMUSG0000084967  | Gm12296 | 12 | ENSMUSG00000020701 | Tmem132e  | 16 |
| ENSMUSG0000082145  | Gm12312 | 20 | ENSMUSG00000039428 | Tmem135   | 3  |
| ENSMUSG0000087116  | Gm12324 | 20 | ENSMUSG00000048503 | Tmem136   | 6  |
| ENSMUSG0000085251  | Gm12326 | 20 | ENSMUSG00000024666 | Tmem138   | 20 |
| ENSMUSG0000081552  | Gm12328 | 3  | ENSMUSG00000057137 | Tmem140   | 20 |
| ENSMUSG0000081485  | Gm12338 | 20 | ENSMUSG00000026939 | Tmem141   | 9  |
| ENSMUSG0000087059  | Gm12339 | 20 | ENSMUSG00000002781 | Tmem143   | 20 |
| ENSMUSG00000102038 | Gm12345 | 20 | ENSMUSG00000027956 | Tmem144   | 1  |
| ENSMUSG0000083899  | Gm12346 | 9  | ENSMUSG00000043843 | Tmem145   | 18 |
| ENSMUSG0000095588  | Gm12350 | 19 | ENSMUSG00000006315 | Tmem147   | 12 |

|                    |         |    |                    |            |    |
|--------------------|---------|----|--------------------|------------|----|
| ENSMUSG0000078772  | Gm12353 | 1  | ENSMUSG0000097320  | Tmem147os  | 20 |
| ENSMUSG0000078134  | Gm12355 | 20 | ENSMUSG0000025933  | Tmem14a    | 1  |
| ENSMUSG0000075576  | Gm12359 | 20 | ENSMUSG0000021361  | Tmem14c    | 20 |
| ENSMUSG0000082762  | Gm12366 | 20 | ENSMUSG0000046456  | Tmem150b   | 19 |
| ENSMUSG0000084828  | Gm12367 | 20 | ENSMUSG0000050640  | Tmem150c   | 9  |
| ENSMUSG0000082169  | Gm12369 | 20 | ENSMUSG0000061451  | Tmem151a   | 16 |
| ENSMUSG0000084898  | Gm12371 | 20 | ENSMUSG0000096847  | Tmem151b   | 19 |
| ENSMUSG0000056412  | Gm12396 | 20 | ENSMUSG0000056498  | Tmem154    | 12 |
| ENSMUSG0000081309  | Gm12397 | 20 | ENSMUSG0000037913  | Tmem156    | 20 |
| ENSMUSG0000082186  | Gm12403 | 20 | ENSMUSG0000054871  | Tmem158    | 19 |
| ENSMUSG0000087623  | Gm12404 | 20 | ENSMUSG0000030917  | Tmem159    | 20 |
| ENSMUSG0000085980  | Gm12408 | 20 | ENSMUSG0000019158  | Tmem160    | 20 |
| ENSMUSG0000081559  | Gm12411 | 20 | ENSMUSG0000002342  | Tmem161a   | 1  |
| ENSMUSG0000083044  | Gm12416 | 20 | ENSMUSG0000035762  | Tmem161b   | 20 |
| ENSMUSG0000083139  | Gm12418 | 20 | ENSMUSG0000026347  | Tmem163    | 9  |
| ENSMUSG0000082185  | Gm12428 | 20 | ENSMUSG0000047045  | Tmem164    | 20 |
| ENSMUSG0000081152  | Gm12430 | 20 | ENSMUSG0000029234  | Tmem165    | 20 |
| ENSMUSG0000081953  | Gm12435 | 20 | ENSMUSG0000012422  | Tmem167    | 20 |
| ENSMUSG0000080850  | Gm12439 | 20 | ENSMUSG0000068732  | Tmem167b   | 10 |
| ENSMUSG0000082194  | Gm12444 | 20 | ENSMUSG0000029569  | Tmem168    | 20 |
| ENSMUSG0000080816  | Gm12447 | 20 | ENSMUSG0000026188  | Tmem169    | 17 |
| ENSMUSG0000082725  | Gm12451 | 18 | ENSMUSG0000049904  | Tmem17     | 20 |
| ENSMUSG0000087142  | Gm12454 | 1  | ENSMUSG0000031953  | Tmem170    | 6  |
| ENSMUSG0000083153  | Gm12459 | 20 | ENSMUSG0000087370  | Tmem170b   | 3  |
| ENSMUSG0000086211  | Gm12462 | 20 | ENSMUSG0000024349  | Tmem173    | 20 |
| ENSMUSG0000081516  | Gm12470 | 1  | ENSMUSG0000013495  | Tmem175    | 20 |
| ENSMUSG0000043770  | Gm12481 | 12 | ENSMUSG0000023367  | Tmem176a   | 20 |
| ENSMUSG0000081975  | Gm12482 | 20 | ENSMUSG0000029810  | Tmem176b   | 20 |
| ENSMUSG0000056411  | Gm12500 | 16 | ENSMUSG0000036975  | Tmem177    | 20 |
| ENSMUSG0000083627  | Gm12502 | 20 | ENSMUSG0000024245  | Tmem178    | 5  |
| ENSMUSG0000074281  | Gm12522 | 20 | ENSMUSG0000057716  | Tmem178b   | 3  |
| ENSMUSG0000078601  | Gm12525 | 20 | ENSMUSG0000054013  | Tmem179    | 20 |
| ENSMUSG0000083979  | Gm12527 | 20 | ENSMUSG00000118346 | Tmem179b   | 20 |
| ENSMUSG0000085654  | Gm12536 | 9  | ENSMUSG0000043061  | Tmem18     | 20 |
| ENSMUSG0000083353  | Gm12540 | 20 | ENSMUSG0000038141  | Tmem181a   | 9  |
| ENSMUSG0000080772  | Gm12543 | 20 | ENSMUSG0000096780  | Tmem181b-p | 9  |
| ENSMUSG0000081078  | Gm12568 | 20 | ENSMUSG0000093880  | Tmem181c-p | 20 |
| ENSMUSG0000085235  | Gm12576 | 20 | ENSMUSG0000042305  | Tmem183a   | 20 |
| ENSMUSG0000083834  | Gm12577 | 12 | ENSMUSG0000009035  | Tmem184b   | 20 |
| ENSMUSG0000084401  | Gm12586 | 20 | ENSMUSG0000031617  | Tmem184c   | 20 |
| ENSMUSG0000053263  | Gm12592 | 20 | ENSMUSG0000073139  | Tmem185a   | 20 |
| ENSMUSG0000081325  | Gm12599 | 20 | ENSMUSG0000098923  | Tmem185b   | 20 |
| ENSMUSG0000085147  | Gm12609 | 20 | ENSMUSG0000043140  | Tmem186    | 20 |
| ENSMUSG0000086035  | Gm12610 | 1  | ENSMUSG0000090213  | Tmem189    | 20 |
| ENSMUSG0000087128  | Gm12655 | 20 | ENSMUSG0000069520  | Tmem19     | 20 |
| ENSMUSG0000063314  | Gm12657 | 20 | ENSMUSG0000055692  | Tmem191c   | 3  |
| ENSMUSG00000101316 | Gm12663 | 20 | ENSMUSG0000025521  | Tmem192    | 12 |
| ENSMUSG00000100863 | Gm12669 | 20 | ENSMUSG0000048004  | Tmem196    | 3  |
| ENSMUSG0000070891  | Gm12689 | 16 | ENSMUSG0000051703  | Tmem198    | 20 |
| ENSMUSG0000083179  | Gm12693 | 20 | ENSMUSG0000047090  | Tmem198b   | 20 |
| ENSMUSG0000084159  | Gm12696 | 20 | ENSMUSG0000051232  | Tmem199    | 20 |
| ENSMUSG0000082683  | Gm12697 | 20 | ENSMUSG0000049420  | Tmem200a   | 5  |
| ENSMUSG0000086385  | Gm12701 | 20 | ENSMUSG0000070720  | Tmem200b   | 9  |
| ENSMUSG0000081811  | Gm12713 | 20 | ENSMUSG0000095407  | Tmem200c   | 19 |
| ENSMUSG0000059195  | Gm12715 | 9  | ENSMUSG0000044700  | Tmem201    | 20 |

|                    |         |    |                    |            |    |
|--------------------|---------|----|--------------------|------------|----|
| ENSMUSG0000081696  | Gm12717 | 20 | ENSMUSG0000049526  | Tmem202    | 3  |
| ENSMUSG0000081819  | Gm12722 | 20 | ENSMUSG0000078201  | Tmem203    | 20 |
| ENSMUSG0000081451  | Gm12734 | 12 | ENSMUSG0000024168  | Tmem204    | 12 |
| ENSMUSG0000085093  | Gm12737 | 20 | ENSMUSG0000040883  | Tmem205    | 13 |
| ENSMUSG0000084968  | Gm12743 | 10 | ENSMUSG0000014856  | Tmem208    | 20 |
| ENSMUSG0000083512  | Gm12749 | 20 | ENSMUSG0000029782  | Tmem209    | 20 |
| ENSMUSG0000062554  | Gm12751 | 20 | ENSMUSG0000043164  | Tmem212    | 14 |
| ENSMUSG0000085105  | Gm12758 | 1  | ENSMUSG0000038828  | Tmem214    | 20 |
| ENSMUSG0000082928  | Gm12785 | 20 | ENSMUSG0000046593  | Tmem215    | 20 |
| ENSMUSG0000081121  | Gm12791 | 20 | ENSMUSG0000024667  | Tmem216    | 20 |
| ENSMUSG0000082264  | Gm12799 | 20 | ENSMUSG0000032121  | Tmem218    | 20 |
| ENSMUSG0000081068  | Gm12804 | 20 | ENSMUSG0000060538  | Tmem219    | 20 |
| ENSMUSG0000081813  | Gm12806 | 20 | ENSMUSG0000050270  | Tmem220    | 20 |
| ENSMUSG0000083011  | Gm12816 | 10 | ENSMUSG0000028857  | Tmem222    | 19 |
| ENSMUSG0000085278  | Gm12841 | 20 | ENSMUSG00000117924 | Tmem223    | 19 |
| ENSMUSG0000084260  | Gm12844 | 20 | ENSMUSG0000048022  | Tmem229a   | 18 |
| ENSMUSG0000081046  | Gm12846 | 19 | ENSMUSG0000046157  | Tmem229b   | 18 |
| ENSMUSG0000082941  | Gm12850 | 20 | ENSMUSG0000027341  | Tmem230    | 20 |
| ENSMUSG0000081733  | Gm12852 | 20 | ENSMUSG0000031951  | Tmem231    | 9  |
| ENSMUSG0000082515  | Gm12902 | 20 | ENSMUSG0000045036  | Tmem232    | 9  |
| ENSMUSG0000085875  | Gm12905 | 1  | ENSMUSG0000028797  | Tmem234    | 20 |
| ENSMUSG0000083104  | Gm12917 | 20 | ENSMUSG0000038079  | Tmem237    | 13 |
| ENSMUSG0000066315  | Gm12918 | 18 | ENSMUSG0000030431  | Tmem238    | 20 |
| ENSMUSG0000082381  | Gm12928 | 20 | ENSMUSG0000084845  | Tmem240    | 9  |
| ENSMUSG0000084099  | Gm12929 | 20 | ENSMUSG0000049411  | Tmem241    | 20 |
| ENSMUSG0000087011  | Gm12930 | 1  | ENSMUSG0000004945  | Tmem242    | 12 |
| ENSMUSG0000082888  | Gm12934 | 20 | ENSMUSG0000079659  | Tmem243    | 20 |
| ENSMUSG0000085334  | Gm12940 | 20 | ENSMUSG0000055296  | Tmem245    | 3  |
| ENSMUSG0000084088  | Gm12941 | 20 | ENSMUSG0000039611  | Tmem246    | 18 |
| ENSMUSG0000087299  | Gm12953 | 20 | ENSMUSG0000053094  | Tmem248    | 20 |
| ENSMUSG00000100514 | Gm12960 | 20 | ENSMUSG0000002032  | Tmem25     | 18 |
| ENSMUSG0000082686  | Gm12961 | 20 | ENSMUSG0000087679  | Tmem250-ps | 20 |
| ENSMUSG0000085517  | Gm12963 | 20 | ENSMUSG0000046675  | Tmem251    | 20 |
| ENSMUSG00000070729 | Gm12966 | 20 | ENSMUSG0000048572  | Tmem252    | 20 |
| ENSMUSG0000087449  | Gm12971 | 20 | ENSMUSG0000036502  | Tmem255a   | 17 |
| ENSMUSG0000082711  | Gm12987 | 20 | ENSMUSG0000038457  | Tmem255b   | 13 |
| ENSMUSG0000082743  | Gm12988 | 20 | ENSMUSG0000070394  | Tmem256    | 12 |
| ENSMUSG0000083678  | Gm12989 | 20 | ENSMUSG0000036372  | Tmem258    | 12 |
| ENSMUSG0000081136  | Gm12990 | 20 | ENSMUSG0000013858  | Tmem259    | 20 |
| ENSMUSG0000085667  | Gm12992 | 9  | ENSMUSG0000060044  | Tmem26     | 20 |
| ENSMUSG0000082063  | Gm12993 | 20 | ENSMUSG0000036339  | Tmem260    | 20 |
| ENSMUSG0000086417  | Gm12996 | 20 | ENSMUSG0000060935  | Tmem263    | 7  |
| ENSMUSG0000087352  | Gm12999 | 20 | ENSMUSG0000032313  | Tmem266    | 20 |
| ENSMUSG0000087084  | Gm13016 | 9  | ENSMUSG0000074634  | Tmem267    | 20 |
| ENSMUSG0000086159  | Gm13025 | 20 | ENSMUSG0000045917  | Tmem268    | 20 |
| ENSMUSG0000087698  | Gm13031 | 3  | ENSMUSG0000028642  | Tmem269    | 20 |
| ENSMUSG0000083816  | Gm13033 | 20 | ENSMUSG0000041707  | Tmem273    | 20 |
| ENSMUSG0000086806  | Gm13054 | 20 | ENSMUSG0000071719  | Tmem28     | 2  |
| ENSMUSG0000086665  | Gm13067 | 20 | ENSMUSG0000041353  | Tmem29     | 20 |
| ENSMUSG0000083811  | Gm13071 | 13 | ENSMUSG0000032328  | Tmem30a    | 20 |
| ENSMUSG0000044377  | Gm13080 | 20 | ENSMUSG0000022753  | Tmem30c    | 20 |
| ENSMUSG0000081227  | Gm13082 | 20 | ENSMUSG0000037720  | Tmem33     | 20 |
| ENSMUSG0000085213  | Gm13091 | 9  | ENSMUSG0000033578  | Tmem35a    | 12 |
| ENSMUSG0000085787  | Gm13092 | 20 | ENSMUSG0000070737  | Tmem35b    | 20 |
| ENSMUSG0000087094  | Gm13093 | 20 | ENSMUSG0000050777  | Tmem37     | 20 |



|                   |         |    |                    |         |    |
|-------------------|---------|----|--------------------|---------|----|
| ENSMUSG0000087437 | Gm13112 | 6  | ENSMUSG00000031791 | Tmem38a | 9  |
| ENSMUSG0000083708 | Gm13123 | 20 | ENSMUSG00000028420 | Tmem38b | 20 |
| ENSMUSG0000070610 | Gm13127 | 20 | ENSMUSG00000002845 | Tmem39a | 20 |
| ENSMUSG0000082925 | Gm13135 | 20 | ENSMUSG00000053730 | Tmem39b | 18 |
| ENSMUSG0000081179 | Gm13136 | 1  | ENSMUSG00000022856 | Tmem41a | 11 |
| ENSMUSG0000083027 | Gm13140 | 2  | ENSMUSG00000047554 | Tmem41b | 20 |
| ENSMUSG0000081405 | Gm13142 | 20 | ENSMUSG00000066233 | Tmem42  | 12 |
| ENSMUSG0000082248 | Gm13161 | 20 | ENSMUSG00000030095 | Tmem43  | 20 |
| ENSMUSG0000082779 | Gm13162 | 20 | ENSMUSG00000022537 | Tmem44  | 9  |
| ENSMUSG0000086921 | Gm13189 | 18 | ENSMUSG00000025666 | Tmem47  | 1  |
| ENSMUSG0000086670 | Gm13194 | 20 | ENSMUSG00000028822 | Tmem50a | 19 |
| ENSMUSG0000086606 | Gm13205 | 18 | ENSMUSG00000022964 | Tmem50b | 20 |
| ENSMUSG0000083885 | Gm13213 | 20 | ENSMUSG00000048772 | Tmem53  | 20 |
| ENSMUSG0000082953 | Gm13217 | 20 | ENSMUSG00000028132 | Tmem56  | 18 |
| ENSMUSG0000096233 | Gm13238 | 6  | ENSMUSG00000028618 | Tmem59  | 3  |
| ENSMUSG0000073716 | Gm13241 | 20 | ENSMUSG00000035964 | Tmem59l | 9  |
| ENSMUSG0000084105 | Gm13252 | 20 | ENSMUSG00000045435 | Tmem60  | 20 |
| ENSMUSG0000086850 | Gm13257 | 9  | ENSMUSG00000054484 | Tmem62  | 20 |
| ENSMUSG0000070271 | Gm13268 | 3  | ENSMUSG00000026519 | Tmem63a | 16 |
| ENSMUSG0000087086 | Gm13269 | 20 | ENSMUSG00000036026 | Tmem63b | 3  |
| ENSMUSG0000086358 | Gm13270 | 20 | ENSMUSG00000034145 | Tmem63c | 20 |
| ENSMUSG0000086006 | Gm13293 | 20 | ENSMUSG00000043252 | Tmem64  | 20 |
| ENSMUSG0000083633 | Gm13312 | 9  | ENSMUSG00000062373 | Tmem65  | 18 |
| ENSMUSG0000083305 | Gm13315 | 1  | ENSMUSG00000049488 | Tmem67  | 20 |
| ENSMUSG0000085193 | Gm13322 | 20 | ENSMUSG00000028232 | Tmem68  | 2  |
| ENSMUSG0000082235 | Gm13326 | 20 | ENSMUSG00000055900 | Tmem69  | 20 |
| ENSMUSG0000085680 | Gm13327 | 20 | ENSMUSG00000025940 | Tmem70  | 20 |
| ENSMUSG0000081128 | Gm13328 | 20 | ENSMUSG00000036944 | Tmem71  | 20 |
| ENSMUSG0000081519 | Gm13331 | 20 | ENSMUSG00000048108 | Tmem72  | 13 |
| ENSMUSG0000082884 | Gm13339 | 9  | ENSMUSG00000054409 | Tmem74  | 20 |
| ENSMUSG0000083563 | Gm13340 | 20 | ENSMUSG00000044364 | Tmem74b | 20 |
| ENSMUSG0000083863 | Gm13341 | 20 | ENSMUSG00000001420 | Tmem79  | 20 |
| ENSMUSG0000082516 | Gm13342 | 20 | ENSMUSG00000024180 | Tmem8   | 19 |
| ENSMUSG0000082520 | Gm13349 | 20 | ENSMUSG00000025505 | Tmem80  | 20 |
| ENSMUSG0000083070 | Gm13350 | 2  | ENSMUSG00000048174 | Tmem81  | 20 |
| ENSMUSG0000083650 | Gm13357 | 19 | ENSMUSG00000043085 | Tmem82  | 20 |
| ENSMUSG0000060795 | Gm13363 | 12 | ENSMUSG00000010307 | Tmem86a | 20 |
| ENSMUSG0000084383 | Gm13370 | 12 | ENSMUSG00000045282 | Tmem86b | 20 |
| ENSMUSG0000075514 | Gm13375 | 20 | ENSMUSG00000033808 | Tmem87a | 20 |
| ENSMUSG0000085206 | Gm13380 | 20 | ENSMUSG00000014353 | Tmem87b | 3  |
| ENSMUSG0000087079 | Gm13389 | 18 | ENSMUSG00000045377 | Tmem88  | 9  |
| ENSMUSG0000083773 | Gm13394 | 20 | ENSMUSG00000073680 | Tmem88b | 15 |
| ENSMUSG0000085987 | Gm13403 | 20 | ENSMUSG00000078716 | Tmem8b  | 19 |
| ENSMUSG0000086904 | Gm13404 | 20 | ENSMUSG00000026411 | Tmem9   | 7  |
| ENSMUSG0000081992 | Gm13408 | 20 | ENSMUSG00000061702 | Tmem91  | 12 |
| ENSMUSG0000083116 | Gm13410 | 20 | ENSMUSG00000020747 | Tmem94  | 9  |
| ENSMUSG0000087635 | Gm13414 | 20 | ENSMUSG00000037278 | Tmem97  | 1  |
| ENSMUSG0000084241 | Gm13416 | 18 | ENSMUSG00000035413 | Tmem98  | 20 |
| ENSMUSG0000085929 | Gm13421 | 12 | ENSMUSG00000031021 | Tmem9b  | 20 |
| ENSMUSG0000084098 | Gm13422 | 20 | ENSMUSG00000030059 | Tmf1    | 3  |
| ENSMUSG0000081648 | Gm13423 | 20 | ENSMUSG00000049555 | Tmie    | 6  |
| ENSMUSG0000085224 | Gm13425 | 1  | ENSMUSG00000079834 | Tmlhe   | 1  |
| ENSMUSG0000083101 | Gm13430 | 20 | ENSMUSG00000028328 | Tmod1   | 9  |
| ENSMUSG0000083716 | Gm13436 | 12 | ENSMUSG00000032186 | Tmod2   | 8  |
| ENSMUSG0000075391 | Gm13443 | 20 | ENSMUSG00000058587 | Tmod3   | 20 |

|                   |         |    |                   |           |    |
|-------------------|---------|----|-------------------|-----------|----|
| ENSMUSG0000086555 | Gm13446 | 18 | ENSMUSG0000019961 | Tmpo      | 20 |
| ENSMUSG0000083240 | Gm13453 | 20 | ENSMUSG0000079260 | Tmppe     | 20 |
| ENSMUSG0000082536 | Gm13456 | 18 | ENSMUSG0000072845 | Tmprss11a | 13 |
| ENSMUSG0000081999 | Gm13461 | 18 | ENSMUSG0000032091 | Tmprss4   | 20 |
| ENSMUSG0000080994 | Gm13464 | 12 | ENSMUSG0000032268 | Tmprss5   | 20 |
| ENSMUSG0000085591 | Gm13479 | 20 | ENSMUSG0000016942 | Tmprss6   | 1  |
| ENSMUSG0000085862 | Gm13483 | 9  | ENSMUSG0000033177 | Tmprss7   | 9  |
| ENSMUSG0000087701 | Gm13493 | 12 | ENSMUSG0000059406 | Tmprss9   | 9  |
| ENSMUSG0000086349 | Gm13497 | 20 | ENSMUSG0000079523 | Tmsb10    | 10 |
| ENSMUSG0000083287 | Gm13502 | 11 | ENSMUSG0000089768 | Tmsb15b1  | 20 |
| ENSMUSG0000081272 | Gm13509 | 20 | ENSMUSG0000089996 | Tmsb15b2  | 20 |
| ENSMUSG0000080937 | Gm13510 | 20 | ENSMUSG0000072955 | Tmsb15l   | 12 |
| ENSMUSG0000085397 | Gm13524 | 20 | ENSMUSG0000049775 | Tmsb4x    | 12 |
| ENSMUSG0000082879 | Gm13525 | 13 | ENSMUSG0000030306 | Tmtc1     | 6  |
| ENSMUSG0000086939 | Gm13530 | 20 | ENSMUSG0000036019 | Tmtc2     | 3  |
| ENSMUSG0000086995 | Gm13544 | 20 | ENSMUSG0000036676 | Tmtc3     | 20 |
| ENSMUSG0000085815 | Gm13548 | 20 | ENSMUSG0000041594 | Tmtc4     | 20 |
| ENSMUSG0000084250 | Gm13550 | 20 | ENSMUSG0000028958 | Tmub1     | 20 |
| ENSMUSG0000081157 | Gm13552 | 20 | ENSMUSG0000034757 | Tmub2     | 19 |
| ENSMUSG0000086129 | Gm13558 | 20 | ENSMUSG0000021072 | Tmx1      | 20 |
| ENSMUSG0000086779 | Gm13562 | 20 | ENSMUSG0000050043 | Tmx2      | 2  |
| ENSMUSG0000085767 | Gm13563 | 9  | ENSMUSG0000024614 | Tmx3      | 1  |
| ENSMUSG0000087181 | Gm13570 | 20 | ENSMUSG0000034723 | Tmx4      | 1  |
| ENSMUSG0000080198 | Gm13573 | 20 | ENSMUSG0000028364 | Tnc       | 18 |
| ENSMUSG0000081236 | Gm13574 | 20 | ENSMUSG0000017615 | Tnfaip1   | 20 |
| ENSMUSG0000084104 | Gm13578 | 20 | ENSMUSG0000021281 | Tnfaip2   | 20 |
| ENSMUSG0000082931 | Gm13586 | 20 | ENSMUSG0000019850 | Tnfaip3   | 20 |
| ENSMUSG0000081299 | Gm13603 | 20 | ENSMUSG0000053475 | Tnfaip6   | 16 |
| ENSMUSG0000083910 | Gm13604 | 12 | ENSMUSG0000062210 | Tnfaip8   | 13 |
| ENSMUSG0000081257 | Gm13607 | 20 | ENSMUSG0000044469 | Tnfaip8l1 | 20 |
| ENSMUSG0000081480 | Gm13608 | 20 | ENSMUSG0000013707 | Tnfaip8l2 | 20 |
| ENSMUSG0000066068 | Gm13611 | 20 | ENSMUSG0000074345 | Tnfaip8l3 | 18 |
| ENSMUSG0000082345 | Gm13622 | 20 | ENSMUSG0000022074 | Tnfrsf10b | 20 |
| ENSMUSG0000089902 | Gm13625 | 20 | ENSMUSG0000026321 | Tnfrsf11a | 18 |
| ENSMUSG0000081307 | Gm13627 | 20 | ENSMUSG0000063727 | Tnfrsf11b | 20 |
| ENSMUSG0000087301 | Gm13629 | 18 | ENSMUSG0000023905 | Tnfrsf12a | 9  |
| ENSMUSG0000085386 | Gm13630 | 20 | ENSMUSG0000010142 | Tnfrsf13b | 20 |
| ENSMUSG0000082190 | Gm13641 | 20 | ENSMUSG0000068105 | Tnfrsf13c | 1  |
| ENSMUSG0000084087 | Gm13650 | 9  | ENSMUSG0000042333 | Tnfrsf14  | 20 |
| ENSMUSG0000081611 | Gm13651 | 20 | ENSMUSG0000041954 | Tnfrsf18  | 20 |
| ENSMUSG0000080979 | Gm13675 | 20 | ENSMUSG0000060548 | Tnfrsf19  | 20 |
| ENSMUSG0000081400 | Gm13680 | 20 | ENSMUSG0000030341 | Tnfrsf1a  | 20 |
| ENSMUSG0000083284 | Gm13688 | 20 | ENSMUSG0000028599 | Tnfrsf1b  | 12 |
| ENSMUSG0000081487 | Gm13689 | 20 | ENSMUSG0000023915 | Tnfrsf21  | 1  |
| ENSMUSG0000096337 | Gm13694 | 2  | ENSMUSG0000010751 | Tnfrsf22  | 10 |
| ENSMUSG0000083864 | Gm13719 | 20 | ENSMUSG0000037613 | Tnfrsf23  | 20 |
| ENSMUSG0000082908 | Gm13736 | 20 | ENSMUSG0000024793 | Tnfrsf25  | 20 |
| ENSMUSG0000085547 | Gm13767 | 9  | ENSMUSG0000029075 | Tnfrsf4   | 9  |
| ENSMUSG0000080977 | Gm13772 | 20 | ENSMUSG0000028965 | Tnfrsf9   | 20 |
| ENSMUSG0000081730 | Gm13785 | 20 | ENSMUSG0000039304 | Tnfsf10   | 20 |
| ENSMUSG0000083951 | Gm13786 | 20 | ENSMUSG0000097328 | Tnfsf12   | 20 |
| ENSMUSG0000081248 | Gm13787 | 20 | ENSMUSG0000031497 | Tnfsf13b  | 20 |
| ENSMUSG0000082820 | Gm13803 | 20 | ENSMUSG0000085890 | Tnfsf13os | 20 |
| ENSMUSG0000086368 | Gm13830 | 20 | ENSMUSG0000035678 | Tnfsf9    | 20 |
| ENSMUSG0000087292 | Gm13832 | 20 | ENSMUSG0000027692 | Tnik      | 9  |

|                   |         |    |                    |          |    |
|-------------------|---------|----|--------------------|----------|----|
| ENSMUSG0000086922 | Gm13835 | 20 | ENSMUSG00000020400 | Tnlp1    | 20 |
| ENSMUSG0000086849 | Gm13840 | 20 | ENSMUSG00000059866 | Tnlp2    | 20 |
| ENSMUSG0000083833 | Gm13841 | 12 | ENSMUSG00000044162 | Tnlp3    | 20 |
| ENSMUSG0000086855 | Gm13844 | 2  | ENSMUSG00000022791 | Tnk2     | 20 |
| ENSMUSG0000085382 | Gm13861 | 20 | ENSMUSG00000031529 | Tnks     | 3  |
| ENSMUSG0000082920 | Gm13864 | 20 | ENSMUSG00000033955 | Tnks1bp1 | 5  |
| ENSMUSG0000083306 | Gm13868 | 20 | ENSMUSG00000024811 | Tnks2    | 2  |
| ENSMUSG0000087185 | Gm13872 | 20 | ENSMUSG00000091898 | Tnnc1    | 9  |
| ENSMUSG0000081010 | Gm13880 | 20 | ENSMUSG00000026418 | Tnni1    | 20 |
| ENSMUSG0000081721 | Gm13882 | 20 | ENSMUSG00000035458 | Tnni3    | 20 |
| ENSMUSG0000087473 | Gm13883 | 20 | ENSMUSG00000064179 | Tnnt1    | 18 |
| ENSMUSG0000083856 | Gm13886 | 20 | ENSMUSG00000026414 | Tnnt2    | 8  |
| ENSMUSG0000087006 | Gm13889 | 9  | ENSMUSG00000009470 | Tnpo1    | 16 |
| ENSMUSG0000063684 | Gm13910 | 20 | ENSMUSG00000031691 | Tnpo2    | 19 |
| ENSMUSG0000084094 | Gm13961 | 20 | ENSMUSG00000012535 | Tnpo3    | 2  |
| ENSMUSG0000085222 | Gm13974 | 9  | ENSMUSG00000015829 | Tnr      | 1  |
| ENSMUSG0000081787 | Gm13991 | 20 | ENSMUSG00000039477 | Tnrc18   | 20 |
| ENSMUSG0000082651 | Gm14001 | 20 | ENSMUSG00000052707 | Tnrc6a   | 18 |
| ENSMUSG0000087056 | Gm14004 | 20 | ENSMUSG00000047888 | Tnrc6b   | 2  |
| ENSMUSG0000081967 | Gm14017 | 20 | ENSMUSG00000025571 | Tnrc6c   | 20 |
| ENSMUSG0000081264 | Gm14021 | 20 | ENSMUSG00000055322 | Tns1     | 20 |
| ENSMUSG0000082274 | Gm14026 | 20 | ENSMUSG00000037003 | Tns2     | 1  |
| ENSMUSG0000090248 | Gm14027 | 20 | ENSMUSG00000020422 | Tns3     | 9  |
| ENSMUSG0000087040 | Gm14033 | 20 | ENSMUSG00000017607 | Tns4     | 20 |
| ENSMUSG0000082399 | Gm14036 | 20 | ENSMUSG00000033327 | Tnxb     | 20 |
| ENSMUSG0000083879 | Gm14038 | 20 | ENSMUSG00000037573 | Tob1     | 18 |
| ENSMUSG0000083483 | Gm14044 | 12 | ENSMUSG00000048546 | Tob2     | 20 |
| ENSMUSG0000080989 | Gm14048 | 20 | ENSMUSG00000028688 | Toe1     | 20 |
| ENSMUSG0000083953 | Gm14049 | 16 | ENSMUSG00000035614 | Togaram1 | 2  |
| ENSMUSG0000089662 | Gm14057 | 20 | ENSMUSG00000045761 | Togaram2 | 20 |
| ENSMUSG0000085071 | Gm14066 | 20 | ENSMUSG00000025139 | Tollip   | 19 |
| ENSMUSG0000087158 | Gm14093 | 20 | ENSMUSG00000042870 | Tom1     | 20 |
| ENSMUSG0000083689 | Gm14094 | 20 | ENSMUSG00000020541 | Tom1l1   | 20 |
| ENSMUSG0000080870 | Gm14111 | 20 | ENSMUSG00000000538 | Tom1l2   | 18 |
| ENSMUSG0000084371 | Gm14113 | 20 | ENSMUSG00000093904 | Tomm20   | 9  |
| ENSMUSG0000042938 | Gm14117 | 20 | ENSMUSG00000022427 | Tomm22   | 12 |
| ENSMUSG0000083325 | Gm14121 | 20 | ENSMUSG00000018322 | Tomm34   | 20 |
| ENSMUSG0000083964 | Gm14122 | 20 | ENSMUSG00000002984 | Tomm40   | 20 |
| ENSMUSG0000081494 | Gm14130 | 20 | ENSMUSG00000005674 | Tomm40l  | 20 |
| ENSMUSG0000081470 | Gm14131 | 20 | ENSMUSG00000078713 | Tomm5    | 7  |
| ENSMUSG0000083391 | Gm14148 | 20 | ENSMUSG00000033475 | Tomm6    | 1  |
| ENSMUSG0000082809 | Gm14150 | 20 | ENSMUSG00000084880 | Tomm6os  | 20 |
| ENSMUSG0000081777 | Gm14159 | 20 | ENSMUSG00000028998 | Tomm7    | 12 |
| ENSMUSG0000081434 | Gm14165 | 3  | ENSMUSG00000022752 | Tomm70a  | 9  |
| ENSMUSG0000087433 | Gm14167 | 20 | ENSMUSG00000059323 | Tonsl    | 9  |
| ENSMUSG0000055494 | Gm14168 | 1  | ENSMUSG00000070544 | Top1     | 20 |
| ENSMUSG0000086118 | Gm14169 | 7  | ENSMUSG00000000934 | Top1mt   | 20 |
| ENSMUSG0000061272 | Gm14173 | 20 | ENSMUSG00000020914 | Top2a    | 19 |
| ENSMUSG0000062846 | Gm14176 | 20 | ENSMUSG00000017485 | Top2b    | 2  |
| ENSMUSG0000086496 | Gm14204 | 3  | ENSMUSG00000002814 | Top3a    | 20 |
| ENSMUSG0000087563 | Gm14205 | 5  | ENSMUSG00000022779 | Top3b    | 13 |
| ENSMUSG0000080237 | Gm14239 | 20 | ENSMUSG00000032555 | Topbp1   | 20 |
| ENSMUSG0000082321 | Gm14253 | 20 | ENSMUSG00000036822 | Topors   | 1  |
| ENSMUSG0000084067 | Gm14269 | 20 | ENSMUSG00000026849 | Tor1a    | 20 |
| ENSMUSG0000084013 | Gm14270 | 20 | ENSMUSG00000026466 | Tor1aip1 | 20 |

|                   |         |    |                    |          |    |
|-------------------|---------|----|--------------------|----------|----|
| ENSMUSG0000083793 | Gm14274 | 20 | ENSMUSG0000050565  | Tor1aip2 | 20 |
| ENSMUSG0000082163 | Gm14276 | 20 | ENSMUSG0000026848  | Tor1b    | 20 |
| ENSMUSG0000084113 | Gm14277 | 20 | ENSMUSG0000009563  | Tor2a    | 3  |
| ENSMUSG0000081740 | Gm14279 | 12 | ENSMUSG0000060519  | Tor3a    | 20 |
| ENSMUSG0000087445 | Gm14286 | 19 | ENSMUSG0000059555  | Tor4a    | 20 |
| ENSMUSG0000082329 | Gm14287 | 20 | ENSMUSG0000041272  | Tox      | 9  |
| ENSMUSG0000078889 | Gm14288 | 20 | ENSMUSG0000074607  | Tox2     | 6  |
| ENSMUSG0000086098 | Gm14291 | 20 | ENSMUSG0000043668  | Tox3     | 3  |
| ENSMUSG0000061897 | Gm14292 | 20 | ENSMUSG0000016831  | Tox4     | 12 |
| ENSMUSG0000078877 | Gm14295 | 3  | ENSMUSG0000035274  | Tpbg     | 6  |
| ENSMUSG0000074527 | Gm14296 | 20 | ENSMUSG0000096606  | Tpbgl    | 20 |
| ENSMUSG0000081344 | Gm14303 | 3  | ENSMUSG0000032741  | Tpcn1    | 1  |
| ENSMUSG0000078878 | Gm14305 | 20 | ENSMUSG0000048677  | Tpcn2    | 20 |
| ENSMUSG0000078864 | Gm14322 | 20 | ENSMUSG0000027506  | Tpd52    | 20 |
| ENSMUSG0000095362 | Gm14325 | 20 | ENSMUSG0000094594  | Tpd52-ps | 20 |
| ENSMUSG0000078862 | Gm14326 | 20 | ENSMUSG0000000296  | Tpd5211  | 2  |
| ENSMUSG0000095419 | Gm14328 | 10 | ENSMUSG0000000827  | Tpd5212  | 9  |
| ENSMUSG0000086239 | Gm14329 | 20 | ENSMUSG0000020308  | Tpgs1    | 20 |
| ENSMUSG0000081805 | Gm14335 | 20 | ENSMUSG0000024269  | Tpgs2    | 3  |
| ENSMUSG0000082543 | Gm14336 | 20 | ENSMUSG0000006764  | Tph2     | 3  |
| ENSMUSG0000081232 | Gm14373 | 20 | ENSMUSG00000106755 | Tpi-rs11 | 12 |
| ENSMUSG0000087252 | Gm14379 | 20 | ENSMUSG0000023456  | Tpi1     | 2  |
| ENSMUSG0000084230 | Gm14388 | 20 | ENSMUSG0000029735  | Tpk1     | 20 |
| ENSMUSG0000078903 | Gm14391 | 20 | ENSMUSG0000032366  | Tpm1     | 9  |
| ENSMUSG0000078905 | Gm14393 | 1  | ENSMUSG0000028464  | Tpm2     | 1  |
| ENSMUSG0000090093 | Gm14399 | 20 | ENSMUSG0000027940  | Tpm3     | 20 |
| ENSMUSG0000078872 | Gm14401 | 20 | ENSMUSG0000058126  | Tpm3-rs7 | 20 |
| ENSMUSG0000094786 | Gm14403 | 20 | ENSMUSG0000031799  | Tpm4     | 9  |
| ENSMUSG0000083170 | Gm14405 | 20 | ENSMUSG0000021376  | Tpmt     | 20 |
| ENSMUSG0000078865 | Gm14406 | 20 | ENSMUSG0000020673  | Tpo      | 20 |
| ENSMUSG0000082023 | Gm14407 | 20 | ENSMUSG0000030894  | Tpp1     | 9  |
| ENSMUSG0000078870 | Gm14410 | 20 | ENSMUSG0000041763  | Tpp2     | 20 |
| ENSMUSG0000082765 | Gm14411 | 20 | ENSMUSG0000021573  | Tppp     | 20 |
| ENSMUSG0000078868 | Gm14412 | 20 | ENSMUSG0000014846  | Tppp3    | 3  |
| ENSMUSG0000081590 | Gm14413 | 13 | ENSMUSG0000006005  | Tpr      | 3  |
| ENSMUSG0000082377 | Gm14415 | 11 | ENSMUSG0000002871  | Tpra1    | 13 |
| ENSMUSG0000082724 | Gm14416 | 20 | ENSMUSG0000029030  | Tprgl    | 20 |
| ENSMUSG0000078867 | Gm14418 | 20 | ENSMUSG0000054226  | Tprkb    | 1  |
| ENSMUSG0000078875 | Gm14419 | 20 | ENSMUSG0000048707  | Tprn     | 16 |
| ENSMUSG0000083111 | Gm14421 | 20 | ENSMUSG0000034118  | Tpst1    | 9  |
| ENSMUSG0000081156 | Gm14425 | 20 | ENSMUSG0000029344  | Tpst2    | 1  |
| ENSMUSG0000081574 | Gm14429 | 1  | ENSMUSG0000060126  | Tpt1     | 3  |
| ENSMUSG0000078902 | Gm14443 | 20 | ENSMUSG0000084319  | Tpt1-ps3 | 3  |
| ENSMUSG0000078906 | Gm14444 | 20 | ENSMUSG0000059252  | Tpt1-ps5 | 20 |
| ENSMUSG0000080186 | Gm14448 | 20 | ENSMUSG0000084284  | Tpt1-ps6 | 20 |
| ENSMUSG0000087633 | Gm14455 | 18 | ENSMUSG0000027469  | Tpx2     | 1  |
| ENSMUSG0000081308 | Gm14480 | 20 | ENSMUSG0000029817  | Tra2a    | 20 |
| ENSMUSG0000085587 | Gm14493 | 20 | ENSMUSG0000022858  | Tra2b    | 18 |
| ENSMUSG0000083097 | Gm14494 | 20 | ENSMUSG0000015363  | Trabd    | 18 |
| ENSMUSG0000086931 | Gm14532 | 20 | ENSMUSG0000070867  | Trabd2b  | 20 |
| ENSMUSG0000082855 | Gm14537 | 20 | ENSMUSG0000076928  | Trac     | 20 |
| ENSMUSG0000084830 | Gm14539 | 12 | ENSMUSG0000031887  | Tradd    | 20 |
| ENSMUSG0000080896 | Gm14567 | 20 | ENSMUSG0000026875  | Traf1    | 20 |
| ENSMUSG0000091556 | Gm14569 | 20 | ENSMUSG0000026942  | Traf2    | 20 |
| ENSMUSG0000085624 | Gm14573 | 20 | ENSMUSG0000021277  | Traf3    | 12 |

|                    |         |    |                     |          |    |
|--------------------|---------|----|---------------------|----------|----|
| ENSMUSG0000083098  | Gm14578 | 20 | ENSMUSG00000034292  | Traf3ip1 | 20 |
| ENSMUSG0000082968  | Gm14581 | 12 | ENSMUSG00000019842  | Traf3ip2 | 20 |
| ENSMUSG0000083798  | Gm14584 | 20 | ENSMUSG00000037318  | Traf3ip3 | 9  |
| ENSMUSG0000083621  | Gm14586 | 18 | ENSMUSG00000017386  | Traf4    | 9  |
| ENSMUSG0000081620  | Gm14633 | 20 | ENSMUSG00000027164  | Traf6    | 1  |
| ENSMUSG0000085891  | Gm14634 | 20 | ENSMUSG00000052752  | Traf7    | 20 |
| ENSMUSG00000073274 | Gm14636 | 18 | ENSMUSG00000042726  | Trafd1   | 20 |
| ENSMUSG0000082253  | Gm14639 | 20 | ENSMUSG00000032586  | Traip    | 9  |
| ENSMUSG00000068014 | Gm14648 | 20 | ENSMUSG00000032536  | Trak1    | 12 |
| ENSMUSG0000083074  | Gm14670 | 20 | ENSMUSG00000026028  | Trak2    | 20 |
| ENSMUSG0000081603  | Gm14681 | 20 | ENSMUSG00000025935  | Tram1    | 9  |
| ENSMUSG00000071748 | Gm14698 | 20 | ENSMUSG00000044528  | Tram11   | 20 |
| ENSMUSG0000087644  | Gm14703 | 20 | ENSMUSG00000041779  | Tram2    | 9  |
| ENSMUSG0000082192  | Gm14719 | 20 | ENSMUSG00000062296  | Trank1   | 9  |
| ENSMUSG0000083877  | Gm14740 | 20 | ENSMUSG00000005981  | Trap1    | 20 |
| ENSMUSG0000081583  | Gm14769 | 20 | ENSMUSG00000049299  | Trappc1  | 20 |
| ENSMUSG0000081424  | Gm14774 | 20 | ENSMUSG00000000374  | Trappc10 | 18 |
| ENSMUSG0000083421  | Gm14776 | 13 | ENSMUSG00000038102  | Trappc11 | 20 |
| ENSMUSG0000083744  | Gm14824 | 19 | ENSMUSG00000020628  | Trappc12 | 3  |
| ENSMUSG0000084904  | Gm14827 | 10 | ENSMUSG00000021711  | Trappc13 | 20 |
| ENSMUSG0000083936  | Gm14829 | 20 | ENSMUSG00000079317  | Trappc2  | 20 |
| ENSMUSG0000081418  | Gm14830 | 3  | ENSMUSG00000015013  | Trappc2l | 19 |
| ENSMUSG00000079965 | Gm14853 | 20 | ENSMUSG00000028847  | Trappc3  | 10 |
| ENSMUSG0000082812  | Gm14860 | 20 | ENSMUSG00000032112  | Trappc4  | 12 |
| ENSMUSG0000081978  | Gm14895 | 1  | ENSMUSG00000040236  | Trappc5  | 20 |
| ENSMUSG00000098559 | Gm15013 | 20 | ENSMUSG00000002043  | Trappc6a | 3  |
| ENSMUSG0000086286  | Gm15138 | 20 | ENSMUSG00000020993  | Trappc6b | 1  |
| ENSMUSG00000055109 | Gm15155 | 20 | ENSMUSG00000033382  | Trappc8  | 3  |
| ENSMUSG0000085711  | Gm15163 | 20 | ENSMUSG00000047921  | Trappc9  | 20 |
| ENSMUSG0000086188  | Gm15169 | 20 | ENSMUSG00000030775  | Trat1    | 1  |
| ENSMUSG0000083906  | Gm15186 | 20 | ENSMUSG00000026723  | Trdmt1   | 20 |
| ENSMUSG0000082778  | Gm15191 | 20 | ENSMUSG00000032554  | Trf      | 16 |
| ENSMUSG0000081873  | Gm15197 | 18 | ENSMUSG00000005892  | Trh      | 16 |
| ENSMUSG0000086034  | Gm15201 | 20 | ENSMUSG000000050663 | Trhde    | 5  |
| ENSMUSG0000082007  | Gm15206 | 20 | ENSMUSG00000038760  | Trhr     | 9  |
| ENSMUSG0000087159  | Gm15246 | 20 | ENSMUSG00000039079  | Trhr2    | 20 |
| ENSMUSG0000081355  | Gm15264 | 6  | ENSMUSG00000029535  | Triap1   | 20 |
| ENSMUSG0000086288  | Gm15265 | 20 | ENSMUSG00000032501  | Trib1    | 12 |
| ENSMUSG0000083474  | Gm15267 | 20 | ENSMUSG00000020601  | Trib2    | 2  |
| ENSMUSG0000087400  | Gm15270 | 9  | ENSMUSG00000032715  | Trib3    | 20 |
| ENSMUSG0000081277  | Gm15285 | 20 | ENSMUSG00000043496  | Tril     | 18 |
| ENSMUSG00000074449 | Gm15319 | 20 | ENSMUSG00000020455  | Trim11   | 9  |
| ENSMUSG0000086095  | Gm15328 | 1  | ENSMUSG00000066258  | Trim12a  | 20 |
| ENSMUSG0000085289  | Gm15337 | 12 | ENSMUSG000000057143 | Trim12c  | 20 |
| ENSMUSG0000085899  | Gm15338 | 20 | ENSMUSG00000035235  | Trim13   | 20 |
| ENSMUSG0000084899  | Gm15344 | 20 | ENSMUSG00000039853  | Trim14   | 20 |
| ENSMUSG0000086770  | Gm15351 | 20 | ENSMUSG00000047821  | Trim16   | 20 |
| ENSMUSG0000083283  | Gm15361 | 20 | ENSMUSG00000036964  | Trim17   | 20 |
| ENSMUSG0000082208  | Gm15379 | 9  | ENSMUSG00000027993  | Trim2    | 10 |
| ENSMUSG0000081771  | Gm15381 | 20 | ENSMUSG00000030966  | Trim21   | 3  |
| ENSMUSG0000084240  | Gm15383 | 20 | ENSMUSG00000021712  | Trim23   | 20 |
| ENSMUSG0000083093  | Gm15385 | 1  | ENSMUSG00000029833  | Trim24   | 20 |
| ENSMUSG0000082585  | Gm15387 | 20 | ENSMUSG00000000275  | Trim25   | 20 |
| ENSMUSG00000109491 | Gm15396 | 3  | ENSMUSG00000024457  | Trim26   | 18 |
| ENSMUSG0000085176  | Gm15397 | 18 | ENSMUSG00000021326  | Trim27   | 20 |

|                    |         |    |                    |             |    |
|--------------------|---------|----|--------------------|-------------|----|
| ENSMUSG0000085971  | Gm15411 | 20 | ENSMUSG0000005566  | Trim28      | 20 |
| ENSMUSG0000074466  | Gm15417 | 18 | ENSMUSG00000036989 | Trim3       | 19 |
| ENSMUSG0000085573  | Gm15418 | 18 | ENSMUSG00000030921 | Trim30a     | 20 |
| ENSMUSG0000084235  | Gm15421 | 9  | ENSMUSG00000057596 | Trim30d     | 18 |
| ENSMUSG0000082738  | Gm15422 | 9  | ENSMUSG00000051675 | Trim32      | 12 |
| ENSMUSG0000081051  | Gm15427 | 12 | ENSMUSG00000033014 | Trim33      | 4  |
| ENSMUSG0000040323  | Gm15429 | 13 | ENSMUSG00000056144 | Trim34a     | 20 |
| ENSMUSG0000084370  | Gm15442 | 20 | ENSMUSG00000022043 | Trim35      | 20 |
| ENSMUSG0000082588  | Gm15443 | 20 | ENSMUSG00000033949 | Trim36      | 16 |
| ENSMUSG0000085311  | Gm15445 | 20 | ENSMUSG00000018548 | Trim37      | 12 |
| ENSMUSG0000090015  | Gm15446 | 9  | ENSMUSG00000045409 | Trim39      | 20 |
| ENSMUSG0000081402  | Gm15455 | 20 | ENSMUSG00000073399 | Trim40      | 9  |
| ENSMUSG00000100801 | Gm15459 | 1  | ENSMUSG00000040365 | Trim41      | 9  |
| ENSMUSG0000086189  | Gm15462 | 2  | ENSMUSG00000027189 | Trim44      | 5  |
| ENSMUSG0000082609  | Gm15464 | 20 | ENSMUSG00000033233 | Trim45      | 20 |
| ENSMUSG0000081657  | Gm15466 | 12 | ENSMUSG00000042766 | Trim46      | 18 |
| ENSMUSG0000087261  | Gm15477 | 12 | ENSMUSG00000020773 | Trim47      | 20 |
| ENSMUSG0000086145  | Gm15479 | 20 | ENSMUSG00000060441 | Trim5       | 20 |
| ENSMUSG0000081431  | Gm15483 | 20 | ENSMUSG00000043279 | Trim56      | 20 |
| ENSMUSG0000081865  | Gm15484 | 20 | ENSMUSG00000034317 | Trim59      | 16 |
| ENSMUSG0000085012  | Gm15492 | 20 | ENSMUSG00000072244 | Trim6       | 20 |
| ENSMUSG0000091177  | Gm15494 | 18 | ENSMUSG00000041000 | Trim62      | 20 |
| ENSMUSG0000085953  | Gm15496 | 20 | ENSMUSG00000054517 | Trim65      | 20 |
| ENSMUSG0000086583  | Gm15500 | 12 | ENSMUSG00000031026 | Trim66      | 9  |
| ENSMUSG0000087412  | Gm15501 | 12 | ENSMUSG00000036913 | Trim67      | 18 |
| ENSMUSG0000084964  | Gm15503 | 20 | ENSMUSG00000073968 | Trim68      | 18 |
| ENSMUSG0000086477  | Gm15506 | 20 | ENSMUSG00000040350 | Trim7       | 6  |
| ENSMUSG0000086604  | Gm15510 | 20 | ENSMUSG00000079259 | Trim71      | 20 |
| ENSMUSG0000086291  | Gm15513 | 1  | ENSMUSG00000025034 | Trim8       | 19 |
| ENSMUSG0000083443  | Gm15519 | 10 | ENSMUSG00000021071 | Trim9       | 20 |
| ENSMUSG0000085638  | Gm15521 | 6  | ENSMUSG00000022263 | Trio        | 2  |
| ENSMUSG0000080205  | Gm15526 | 20 | ENSMUSG00000033088 | Triobp      | 20 |
| ENSMUSG0000081816  | Gm15528 | 1  | ENSMUSG00000019487 | Trip10      | 13 |
| ENSMUSG0000081651  | Gm15530 | 20 | ENSMUSG00000021188 | Trip11      | 3  |
| ENSMUSG0000085527  | Gm15535 | 20 | ENSMUSG00000026219 | Trip12      | 2  |
| ENSMUSG0000085048  | Gm15537 | 20 | ENSMUSG00000032386 | Trip4       | 20 |
| ENSMUSG0000083579  | Gm15538 | 20 | ENSMUSG00000023348 | Trip6       | 20 |
| ENSMUSG0000081809  | Gm15539 | 20 | ENSMUSG00000055963 | Triqk       | 13 |
| ENSMUSG0000083396  | Gm15542 | 20 | ENSMUSG00000041203 | Trir        | 20 |
| ENSMUSG0000087138  | Gm15545 | 20 | ENSMUSG00000028653 | Trit1       | 20 |
| ENSMUSG0000082265  | Gm15547 | 20 | ENSMUSG00000028331 | Trmo        | 20 |
| ENSMUSG0000081745  | Gm15549 | 20 | ENSMUSG00000001909 | Trmt1       | 3  |
| ENSMUSG0000086401  | Gm15559 | 9  | ENSMUSG00000004127 | Trmt10a     | 9  |
| ENSMUSG0000089870  | Gm15562 | 20 | ENSMUSG00000035601 | Trmt10b     | 20 |
| ENSMUSG0000086324  | Gm15564 | 9  | ENSMUSG00000044763 | Trmt10c     | 13 |
| ENSMUSG0000083772  | Gm15566 | 10 | ENSMUSG00000019792 | Trmt11      | 20 |
| ENSMUSG0000081872  | Gm15572 | 20 | ENSMUSG00000038812 | Trmt112     | 20 |
| ENSMUSG0000083122  | Gm15578 | 20 | ENSMUSG00000070572 | Trmt112-ps2 | 20 |
| ENSMUSG0000080078  | Gm15583 | 20 | ENSMUSG00000037085 | Trmt12      | 20 |
| ENSMUSG0000086769  | Gm15587 | 20 | ENSMUSG00000033439 | Trmt13      | 18 |
| ENSMUSG0000058542  | Gm15590 | 20 | ENSMUSG00000053286 | Trmt1l      | 20 |
| ENSMUSG0000084203  | Gm15593 | 20 | ENSMUSG00000067369 | Trmt2b      | 1  |
| ENSMUSG0000087531  | Gm15606 | 20 | ENSMUSG00000029097 | Trmt44      | 20 |
| ENSMUSG0000086602  | Gm15609 | 18 | ENSMUSG00000034442 | Trmt5       | 20 |
| ENSMUSG0000078183  | Gm15610 | 20 | ENSMUSG00000037376 | Trmt6       | 20 |

|                    |         |    |                   |           |    |
|--------------------|---------|----|-------------------|-----------|----|
| ENSMUSG0000085828  | Gm15612 | 18 | ENSMUSG0000060950 | Trmt61a   | 20 |
| ENSMUSG0000082705  | Gm15616 | 20 | ENSMUSG0000085492 | Trmt61b   | 20 |
| ENSMUSG0000085782  | Gm15624 | 9  | ENSMUSG0000039620 | Trmt9b    | 1  |
| ENSMUSG0000085067  | Gm15631 | 20 | ENSMUSG0000022386 | Trmu      | 20 |
| ENSMUSG0000086414  | Gm15645 | 20 | ENSMUSG0000028898 | Trnau1ap  | 20 |
| ENSMUSG0000085282  | Gm15663 | 1  | ENSMUSG0000056596 | Trnp1     | 20 |
| ENSMUSG0000083420  | Gm15665 | 16 | ENSMUSG0000013736 | Trnt1     | 20 |
| ENSMUSG0000084399  | Gm15666 | 9  | ENSMUSG0000025272 | Tro       | 20 |
| ENSMUSG00000115370 | Gm15667 | 20 | ENSMUSG0000059552 | Trp53     | 20 |
| ENSMUSG0000083795  | Gm15670 | 20 | ENSMUSG0000090704 | Trp53-ps  | 18 |
| ENSMUSG0000086873  | Gm15672 | 20 | ENSMUSG0000043909 | Trp53bp1  | 19 |
| ENSMUSG0000086825  | Gm15675 | 20 | ENSMUSG0000026510 | Trp53bp2  | 20 |
| ENSMUSG0000090116  | Gm15680 | 20 | ENSMUSG0000085912 | Trp53cor1 | 20 |
| ENSMUSG0000086842  | Gm15681 | 20 | ENSMUSG0000068735 | Trp53i11  | 1  |
| ENSMUSG0000095524  | Gm15682 | 12 | ENSMUSG0000044328 | Trp53i13  | 20 |
| ENSMUSG0000089737  | Gm15688 | 20 | ENSMUSG0000028211 | Trp53inp1 | 20 |
| ENSMUSG0000083853  | Gm15696 | 20 | ENSMUSG0000038375 | Trp53inp2 | 16 |
| ENSMUSG0000081670  | Gm15697 | 20 | ENSMUSG0000039725 | Trp53rka  | 20 |
| ENSMUSG0000085658  | Gm15704 | 20 | ENSMUSG0000042854 | Trp53rkb  | 20 |
| ENSMUSG0000086013  | Gm15706 | 20 | ENSMUSG0000022510 | Trp63     | 20 |
| ENSMUSG0000086894  | Gm15708 | 20 | ENSMUSG0000029026 | Trp73     | 14 |
| ENSMUSG0000084111  | Gm15710 | 12 | ENSMUSG0000032839 | Trpc1     | 7  |
| ENSMUSG0000082570  | Gm15711 | 11 | ENSMUSG0000027716 | Trpc3     | 18 |
| ENSMUSG0000083827  | Gm15712 | 20 | ENSMUSG0000027748 | Trpc4     | 5  |
| ENSMUSG0000082120  | Gm15720 | 20 | ENSMUSG0000038324 | Trpc4ap   | 20 |
| ENSMUSG0000085565  | Gm15721 | 9  | ENSMUSG0000041710 | Trpc5     | 20 |
| ENSMUSG0000084865  | Gm15723 | 20 | ENSMUSG0000031997 | Trpc6     | 9  |
| ENSMUSG0000086075  | Gm15728 | 20 | ENSMUSG0000021541 | Trpc7     | 18 |
| ENSMUSG0000086115  | Gm15733 | 20 | ENSMUSG0000009292 | Trpm2     | 9  |
| ENSMUSG0000087526  | Gm15738 | 20 | ENSMUSG0000052387 | Trpm3     | 13 |
| ENSMUSG0000080957  | Gm15739 | 20 | ENSMUSG0000038260 | Trpm4     | 20 |
| ENSMUSG0000090027  | Gm15740 | 20 | ENSMUSG0000024727 | Trpm6     | 18 |
| ENSMUSG0000087605  | Gm15742 | 20 | ENSMUSG0000027365 | Trpm7     | 2  |
| ENSMUSG0000086645  | Gm15743 | 20 | ENSMUSG0000038679 | Trps1     | 12 |
| ENSMUSG0000082088  | Gm15753 | 9  | ENSMUSG0000047656 | Trpt1     | 20 |
| ENSMUSG0000082308  | Gm15770 | 9  | ENSMUSG0000018507 | Trpv2     | 1  |
| ENSMUSG0000062353  | Gm15772 | 12 | ENSMUSG0000043029 | Trpv3     | 20 |
| ENSMUSG0000082872  | Gm15773 | 20 | ENSMUSG0000014158 | Trpv4     | 13 |
| ENSMUSG0000081126  | Gm15784 | 20 | ENSMUSG0000029868 | Trpv6     | 9  |
| ENSMUSG0000086247  | Gm15787 | 20 | ENSMUSG0000045482 | Trrap     | 9  |
| ENSMUSG0000082057  | Gm15789 | 20 | ENSMUSG0000025086 | Trub1     | 20 |
| ENSMUSG0000089648  | Gm15790 | 12 | ENSMUSG0000039826 | Trub2     | 1  |
| ENSMUSG0000082769  | Gm15793 | 20 | ENSMUSG0000010538 | Tsacc     | 20 |
| ENSMUSG0000082130  | Gm15799 | 20 | ENSMUSG0000026812 | Tsc1      | 9  |
| ENSMUSG0000086175  | Gm15802 | 20 | ENSMUSG0000002496 | Tsc2      | 20 |
| ENSMUSG0000083536  | Gm15808 | 20 | ENSMUSG0000022010 | Tsc22d1   | 18 |
| ENSMUSG0000090135  | Gm15809 | 7  | ENSMUSG0000027806 | Tsc22d2   | 3  |
| ENSMUSG0000089710  | Gm15810 | 7  | ENSMUSG0000031431 | Tsc22d3   | 20 |
| ENSMUSG0000083285  | Gm15815 | 20 | ENSMUSG0000029723 | Tsc22d4   | 3  |
| ENSMUSG0000082823  | Gm15828 | 20 | ENSMUSG0000014980 | Tsen15    | 20 |
| ENSMUSG0000085894  | Gm15832 | 20 | ENSMUSG0000042389 | Tsen2     | 13 |
| ENSMUSG0000085054  | Gm15834 | 20 | ENSMUSG0000035585 | Tsen34    | 20 |
| ENSMUSG0000083909  | Gm15842 | 20 | ENSMUSG0000020781 | Tsen54    | 20 |
| ENSMUSG0000090079  | Gm15849 | 20 | ENSMUSG0000040521 | Tsfm      | 20 |
| ENSMUSG0000086264  | Gm15850 | 7  | ENSMUSG0000014402 | Tsg101    | 9  |

|                    |         |    |                    |           |    |
|--------------------|---------|----|--------------------|-----------|----|
| ENSMUSG00000103400 | Gm15853 | 20 | ENSMUSG00000106988 | Tsg101-ps | 20 |
| ENSMUSG00000086944 | Gm15859 | 20 | ENSMUSG00000060771 | Tsga10    | 20 |
| ENSMUSG00000087336 | Gm15860 | 20 | ENSMUSG00000020963 | Tshr      | 20 |
| ENSMUSG00000089812 | Gm15867 | 20 | ENSMUSG00000046982 | Tshz1     | 20 |
| ENSMUSG00000084790 | Gm15879 | 20 | ENSMUSG00000047907 | Tshz2     | 18 |
| ENSMUSG00000085254 | Gm15881 | 20 | ENSMUSG00000021217 | Tshz3     | 19 |
| ENSMUSG00000085754 | Gm15886 | 20 | ENSMUSG00000085715 | Tsix      | 19 |
| ENSMUSG00000085068 | Gm15895 | 6  | ENSMUSG00000059891 | Tsks      | 20 |
| ENSMUSG00000081273 | Gm15896 | 20 | ENSMUSG00000049580 | Tsku      | 20 |
| ENSMUSG00000085917 | Gm15899 | 20 | ENSMUSG00000026374 | Tsn       | 20 |
| ENSMUSG00000086012 | Gm15902 | 3  | ENSMUSG00000056820 | Tsnax     | 18 |
| ENSMUSG00000086916 | Gm15903 | 20 | ENSMUSG00000031893 | Tsnaxip1  | 13 |
| ENSMUSG00000085881 | Gm15912 | 20 | ENSMUSG00000030351 | Tspan11   | 18 |
| ENSMUSG00000087652 | Gm15918 | 20 | ENSMUSG00000029669 | Tspan12   | 18 |
| ENSMUSG00000080893 | Gm15920 | 20 | ENSMUSG00000020577 | Tspan13   | 5  |
| ENSMUSG00000085039 | Gm15927 | 20 | ENSMUSG00000037824 | Tspan14   | 18 |
| ENSMUSG00000084024 | Gm15937 | 20 | ENSMUSG00000037031 | Tspan15   | 9  |
| ENSMUSG00000086313 | Gm15940 | 12 | ENSMUSG00000025875 | Tspan17   | 18 |
| ENSMUSG00000086992 | Gm15941 | 20 | ENSMUSG00000027217 | Tspan18   | 5  |
| ENSMUSG00000085655 | Gm15952 | 20 | ENSMUSG00000027858 | Tspan2    | 16 |
| ENSMUSG00000086935 | Gm15956 | 20 | ENSMUSG00000086745 | Tspan2os  | 9  |
| ENSMUSG00000081692 | Gm15971 | 20 | ENSMUSG00000032324 | Tspan3    | 12 |
| ENSMUSG00000083902 | Gm15975 | 20 | ENSMUSG00000006736 | Tspan31   | 20 |
| ENSMUSG00000087016 | Gm15979 | 20 | ENSMUSG00000052281 | Tspan32os | 20 |
| ENSMUSG00000080700 | Gm15981 | 20 | ENSMUSG00000001763 | Tspan33   | 18 |
| ENSMUSG00000084132 | Gm15982 | 20 | ENSMUSG00000025511 | Tspan4    | 20 |
| ENSMUSG00000081104 | Gm15989 | 20 | ENSMUSG00000028152 | Tspan5    | 20 |
| ENSMUSG00000087266 | Gm15991 | 1  | ENSMUSG00000067377 | Tspan6    | 9  |
| ENSMUSG00000107132 | Gm15997 | 20 | ENSMUSG00000058254 | Tspan7    | 9  |
| ENSMUSG00000086389 | Gm15998 | 20 | ENSMUSG00000030352 | Tspan9    | 18 |
| ENSMUSG00000085433 | Gm16001 | 20 | ENSMUSG00000069581 | Tspear    | 20 |
| ENSMUSG00000087381 | Gm16008 | 6  | ENSMUSG00000041736 | Tspo      | 20 |
| ENSMUSG00000081303 | Gm16011 | 20 | ENSMUSG00000034156 | Tspoap1   | 20 |
| ENSMUSG00000072576 | Gm16020 | 20 | ENSMUSG00000047514 | Tspyl1    | 20 |
| ENSMUSG00000086682 | Gm16023 | 20 | ENSMUSG00000041096 | Tspyl2    | 20 |
| ENSMUSG00000107724 | Gm16042 | 20 | ENSMUSG00000074671 | Tspyl3    | 1  |
| ENSMUSG00000081339 | Gm16044 | 20 | ENSMUSG00000039485 | Tspyl4    | 18 |
| ENSMUSG00000085705 | Gm16046 | 20 | ENSMUSG00000038984 | Tspyl5    | 20 |
| ENSMUSG00000116760 | Gm1604a | 9  | ENSMUSG00000038335 | Tsr1      | 20 |
| ENSMUSG00000094083 | Gm1604b | 18 | ENSMUSG00000025264 | Tsr2      | 16 |
| ENSMUSG00000083974 | Gm16053 | 20 | ENSMUSG00000015126 | Tsr3      | 20 |
| ENSMUSG00000087431 | Gm16054 | 20 | ENSMUSG00000045752 | Tssc4     | 20 |
| ENSMUSG00000087249 | Gm16062 | 20 | ENSMUSG00000007591 | Tssk4     | 20 |
| ENSMUSG00000085125 | Gm16070 | 20 | ENSMUSG00000044986 | Tst       | 20 |
| ENSMUSG00000082051 | Gm16072 | 20 | ENSMUSG00000022570 | Tsta3     | 20 |
| ENSMUSG00000082247 | Gm16074 | 20 | ENSMUSG00000035495 | Tstd2     | 20 |
| ENSMUSG00000087322 | Gm16075 | 1  | ENSMUSG00000028251 | Tstd3     | 10 |
| ENSMUSG00000087514 | Gm16076 | 20 | ENSMUSG00000015599 | Ttbk1     | 20 |
| ENSMUSG00000082967 | Gm16082 | 18 | ENSMUSG00000090100 | Ttbk2     | 3  |
| ENSMUSG00000085526 | Gm16083 | 20 | ENSMUSG00000041278 | Ttc1      | 20 |
| ENSMUSG00000081228 | Gm16089 | 10 | ENSMUSG00000040219 | Ttc12     | 20 |
| ENSMUSG00000089910 | Gm16113 | 20 | ENSMUSG00000037300 | Ttc13     | 19 |
| ENSMUSG00000086914 | Gm16124 | 20 | ENSMUSG00000027677 | Ttc14     | 20 |
| ENSMUSG00000080971 | Gm16128 | 1  | ENSMUSG00000039021 | Ttc16     | 20 |
| ENSMUSG00000084985 | Gm16135 | 20 | ENSMUSG00000027194 | Ttc17     | 19 |



|                    |         |    |                    |           |    |
|--------------------|---------|----|--------------------|-----------|----|
| ENSMUSG0000085687  | Gm16153 | 20 | ENSMUSG0000042298  | Ttc19     | 20 |
| ENSMUSG0000090118  | Gm16163 | 20 | ENSMUSG0000032514  | Ttc21a    | 14 |
| ENSMUSG0000089941  | Gm16168 | 20 | ENSMUSG0000034848  | Ttc21b    | 20 |
| ENSMUSG0000082484  | Gm16177 | 20 | ENSMUSG0000034919  | Ttc22     | 20 |
| ENSMUSG0000086067  | Gm16183 | 20 | ENSMUSG0000030555  | Ttc23     | 20 |
| ENSMUSG0000081520  | Gm16200 | 20 | ENSMUSG0000006784  | Ttc25     | 13 |
| ENSMUSG0000086742  | Gm16201 | 20 | ENSMUSG00000056832 | Ttc26     | 20 |
| ENSMUSG0000081316  | Gm16205 | 20 | ENSMUSG00000024078 | Ttc27     | 1  |
| ENSMUSG0000090006  | Gm16227 | 20 | ENSMUSG00000033209 | Ttc28     | 9  |
| ENSMUSG0000089627  | Gm16228 | 20 | ENSMUSG00000040785 | Ttc3      | 20 |
| ENSMUSG0000090040  | Gm16232 | 20 | ENSMUSG00000075271 | Ttc30a1   | 9  |
| ENSMUSG0000085773  | Gm16233 | 16 | ENSMUSG00000075273 | Ttc30b    | 20 |
| ENSMUSG0000089988  | Gm16238 | 20 | ENSMUSG00000066637 | Ttc32     | 20 |
| ENSMUSG0000089711  | Gm16240 | 20 | ENSMUSG00000022151 | Ttc33     | 20 |
| ENSMUSG0000090235  | Gm16244 | 20 | ENSMUSG00000046637 | Ttc34     | 20 |
| ENSMUSG0000087610  | Gm16253 | 20 | ENSMUSG00000033991 | Ttc37     | 1  |
| ENSMUSG0000089959  | Gm16268 | 10 | ENSMUSG00000035944 | Ttc38     | 20 |
| ENSMUSG0000084862  | Gm16278 | 20 | ENSMUSG00000028555 | Ttc39a    | 6  |
| ENSMUSG0000084998  | Gm16279 | 20 | ENSMUSG00000085873 | Ttc39aos1 | 6  |
| ENSMUSG0000086235  | Gm16284 | 20 | ENSMUSG00000038172 | Ttc39b    | 12 |
| ENSMUSG0000024571  | Gm16286 | 12 | ENSMUSG00000024424 | Ttc39c    | 5  |
| ENSMUSG0000073739  | Gm16287 | 20 | ENSMUSG00000025413 | Ttc4      | 2  |
| ENSMUSG0000085099  | Gm16288 | 20 | ENSMUSG00000044937 | Ttc41     | 20 |
| ENSMUSG0000089679  | Gm16299 | 20 | ENSMUSG00000006288 | Ttc5      | 20 |
| ENSMUSG0000089828  | Gm16300 | 1  | ENSMUSG00000046782 | Ttc6      | 9  |
| ENSMUSG0000086331  | Gm16310 | 20 | ENSMUSG00000036918 | Ttc7      | 9  |
| ENSMUSG0000087435  | Gm16323 | 17 | ENSMUSG00000033530 | Ttc7b     | 18 |
| ENSMUSG0000090050  | Gm16339 | 3  | ENSMUSG00000021013 | Ttc8      | 18 |
| ENSMUSG00000115205 | Gm16374 | 20 | ENSMUSG00000042734 | Ttc9      | 20 |
| ENSMUSG0000095762  | Gm16378 | 6  | ENSMUSG00000007944 | Ttc9b     | 20 |
| ENSMUSG0000059658  | Gm16379 | 20 | ENSMUSG00000071660 | Ttc9c     | 12 |
| ENSMUSG00000116811 | Gm16385 | 20 | ENSMUSG00000026803 | Ttf1      | 20 |
| ENSMUSG00000117333 | Gm16386 | 20 | ENSMUSG00000033222 | Ttf2      | 9  |
| ENSMUSG0000075581  | Gm16409 | 18 | ENSMUSG00000027650 | Tti1      | 20 |
| ENSMUSG0000084093  | Gm16418 | 12 | ENSMUSG00000031577 | Tti2      | 20 |
| ENSMUSG00000043024 | Gm16433 | 20 | ENSMUSG00000027394 | Ttl       | 9  |
| ENSMUSG00000024761 | Gm16437 | 12 | ENSMUSG00000022442 | Ttl1      | 7  |
| ENSMUSG00000072594 | Gm16439 | 1  | ENSMUSG00000026885 | Ttl11     | 9  |
| ENSMUSG00000072738 | Gm16440 | 20 | ENSMUSG00000016757 | Ttl12     | 20 |
| ENSMUSG0000082154  | Gm16464 | 20 | ENSMUSG00000045467 | Ttl13     | 9  |
| ENSMUSG0000098091  | Gm16470 | 20 | ENSMUSG00000030276 | Ttl13     | 1  |
| ENSMUSG00000062758 | Gm16477 | 20 | ENSMUSG00000033257 | Ttl14     | 3  |
| ENSMUSG00000078117 | Gm16485 | 20 | ENSMUSG00000012609 | Ttl15     | 18 |
| ENSMUSG00000108175 | Gm16499 | 20 | ENSMUSG00000038756 | Ttl16     | 14 |
| ENSMUSG00000108255 | Gm16499 | 20 | ENSMUSG00000036745 | Ttl17     | 18 |
| ENSMUSG0000083015  | Gm16518 | 9  | ENSMUSG00000022388 | Ttl18     | 1  |
| ENSMUSG0000082315  | Gm16523 | 20 | ENSMUSG00000074673 | Ttl19     | 12 |
| ENSMUSG0000089810  | Gm16536 | 1  | ENSMUSG00000051747 | Ttn       | 19 |
| ENSMUSG0000089671  | Gm16537 | 20 | ENSMUSG00000073988 | Ttpa      | 20 |
| ENSMUSG0000089673  | Gm16546 | 20 | ENSMUSG00000017679 | Ttpal     | 20 |
| ENSMUSG00000066477 | Gm16551 | 1  | ENSMUSG00000061808 | Ttr       | 13 |
| ENSMUSG0000089908  | Gm16558 | 12 | ENSMUSG00000030428 | Ttyh1     | 1  |
| ENSMUSG0000089806  | Gm16570 | 20 | ENSMUSG00000034714 | Ttyh2     | 16 |
| ENSMUSG0000087543  | Gm16576 | 20 | ENSMUSG00000036565 | Ttyh3     | 1  |
| ENSMUSG0000089764  | Gm16580 | 10 | ENSMUSG00000031028 | Tub       | 5  |

|                    |         |    |                    |            |    |
|--------------------|---------|----|--------------------|------------|----|
| ENSMUSG0000089670  | Gm16581 | 20 | ENSMUSG00000117974 | Tuba-rs1   | 20 |
| ENSMUSG0000074482  | Gm16589 | 12 | ENSMUSG00000072235 | Tuba1a     | 20 |
| ENSMUSG0000097788  | Gm16596 | 20 | ENSMUSG00000023004 | Tuba1b     | 9  |
| ENSMUSG0000097434  | Gm16630 | 20 | ENSMUSG00000043091 | Tuba1c     | 1  |
| ENSMUSG0000087088  | Gm16638 | 20 | ENSMUSG00000026202 | Tuba4a     | 20 |
| ENSMUSG0000097534  | Gm16675 | 20 | ENSMUSG00000030137 | Tuba8      | 20 |
| ENSMUSG00000102548 | Gm16701 | 20 | ENSMUSG00000058672 | Tubb2a     | 9  |
| ENSMUSG0000097823  | Gm16701 | 20 | ENSMUSG00000113275 | Tubb2a-ps2 | 20 |
| ENSMUSG0000097077  | Gm16712 | 20 | ENSMUSG00000045136 | Tubb2b     | 20 |
| ENSMUSG0000070858  | Gm1673  | 12 | ENSMUSG00000062380 | Tubb3      | 18 |
| ENSMUSG0000097167  | Gm16740 | 20 | ENSMUSG00000062591 | Tubb4a     | 16 |
| ENSMUSG0000085303  | Gm16751 | 20 | ENSMUSG00000036752 | Tubb4b     | 9  |
| ENSMUSG0000097439  | Gm16754 | 20 | ENSMUSG00000095159 | Tubb4b-ps1 | 20 |
| ENSMUSG0000086534  | Gm16758 | 20 | ENSMUSG00000001525 | Tubb5      | 9  |
| ENSMUSG0000086539  | Gm16759 | 20 | ENSMUSG00000001473 | Tubb6      | 19 |
| ENSMUSG0000097357  | Gm16793 | 20 | ENSMUSG00000020513 | Tubd1      | 20 |
| ENSMUSG0000097777  | Gm16794 | 7  | ENSMUSG00000019845 | Tube1      | 20 |
| ENSMUSG0000085495  | Gm16796 | 20 | ENSMUSG00000035198 | Tubg1      | 20 |
| ENSMUSG0000087479  | Gm16835 | 16 | ENSMUSG00000045007 | Tubg2      | 20 |
| ENSMUSG0000096981  | Gm16845 | 20 | ENSMUSG00000025474 | Tubgcp2    | 9  |
| ENSMUSG0000097397  | Gm16861 | 20 | ENSMUSG00000000759 | Tubgcp3    | 20 |
| ENSMUSG0000093954  | Gm16867 | 20 | ENSMUSG00000027263 | Tubgcp4    | 3  |
| ENSMUSG0000097876  | Gm16892 | 9  | ENSMUSG00000033790 | Tubgcp5    | 20 |
| ENSMUSG0000097899  | Gm16894 | 18 | ENSMUSG00000051786 | Tubgcp6    | 18 |
| ENSMUSG0000097325  | Gm16897 | 20 | ENSMUSG00000073838 | Tufm       | 20 |
| ENSMUSG0000097456  | Gm16958 | 12 | ENSMUSG00000005968 | Tuft1      | 9  |
| ENSMUSG0000097743  | Gm16973 | 20 | ENSMUSG00000056579 | Tug1       | 20 |
| ENSMUSG0000074404  | Gm1698  | 20 | ENSMUSG00000001521 | Tulp3      | 20 |
| ENSMUSG0000097069  | Gm16998 | 9  | ENSMUSG00000034377 | Tulp4      | 20 |
| ENSMUSG0000041035  | Gm17018 | 2  | ENSMUSG00000097929 | Tunar      | 18 |
| ENSMUSG0000090582  | Gm17024 | 20 | ENSMUSG00000054000 | Tusc1      | 20 |
| ENSMUSG0000091165  | Gm17036 | 20 | ENSMUSG00000010054 | Tusc2      | 9  |
| ENSMUSG0000091509  | Gm17066 | 20 | ENSMUSG00000039530 | Tusc3      | 9  |
| ENSMUSG0000078528  | Gm17068 | 20 | ENSMUSG00000071645 | Tut1       | 1  |
| ENSMUSG0000091288  | Gm17075 | 20 | ENSMUSG00000034610 | Tut4       | 20 |
| ENSMUSG0000090449  | Gm17076 | 20 | ENSMUSG00000035248 | Tut7       | 20 |
| ENSMUSG0000090674  | Gm17082 | 20 | ENSMUSG00000050908 | Tvp23a     | 20 |
| ENSMUSG0000099104  | Gm17087 | 20 | ENSMUSG00000014177 | Tvp23b     | 20 |
| ENSMUSG0000091817  | Gm17091 | 1  | ENSMUSG00000086677 | Tvp23bos   | 20 |
| ENSMUSG0000091623  | Gm17092 | 20 | ENSMUSG00000022451 | Twf1       | 3  |
| ENSMUSG0000090397  | Gm17096 | 20 | ENSMUSG00000023277 | Twf2       | 20 |
| ENSMUSG0000091305  | Gm17100 | 9  | ENSMUSG00000035799 | Twist1     | 1  |
| ENSMUSG0000091665  | Gm17101 | 9  | ENSMUSG00000020561 | Twistnb    | 20 |
| ENSMUSG0000091864  | Gm17102 | 20 | ENSMUSG00000025209 | Twnk       | 20 |
| ENSMUSG0000091079  | Gm17105 | 20 | ENSMUSG00000024098 | Twsg1      | 20 |
| ENSMUSG0000090873  | Gm17112 | 9  | ENSMUSG00000053841 | Txlna      | 20 |
| ENSMUSG0000091968  | Gm17115 | 20 | ENSMUSG00000039891 | Txlnb      | 1  |
| ENSMUSG0000090785  | Gm17116 | 20 | ENSMUSG00000038344 | Txlng      | 16 |
| ENSMUSG0000091881  | Gm17146 | 18 | ENSMUSG00000028367 | Txn1       | 5  |
| ENSMUSG0000090939  | Gm17147 | 20 | ENSMUSG00000005354 | Txn2       | 3  |
| ENSMUSG0000090758  | Gm17178 | 20 | ENSMUSG00000022498 | Txndc11    | 20 |
| ENSMUSG0000090589  | Gm17180 | 20 | ENSMUSG00000028567 | Txndc12    | 2  |
| ENSMUSG0000099115  | Gm17190 | 20 | ENSMUSG00000021497 | Txndc15    | 12 |
| ENSMUSG0000091587  | Gm17191 | 20 | ENSMUSG00000021830 | Txndc16    | 9  |
| ENSMUSG0000079645  | Gm17193 | 20 | ENSMUSG00000020803 | Txndc17    | 20 |

|                    |         |    |                   |          |    |
|--------------------|---------|----|-------------------|----------|----|
| ENSMUSG0000091534  | Gm17195 | 20 | ENSMUSG0000050612 | Txndc2   | 20 |
| ENSMUSG0000090965  | Gm17203 | 11 | ENSMUSG0000038991 | Txndc5   | 20 |
| ENSMUSG0000090561  | Gm17207 | 10 | ENSMUSG0000058407 | Txndc9   | 20 |
| ENSMUSG0000092085  | Gm17224 | 20 | ENSMUSG0000038393 | Txnip    | 14 |
| ENSMUSG0000091426  | Gm17228 | 7  | ENSMUSG0000024583 | Txn1     | 20 |
| ENSMUSG0000092051  | Gm17229 | 20 | ENSMUSG0000057130 | Txn14a   | 20 |
| ENSMUSG0000090706  | Gm17233 | 20 | ENSMUSG0000031723 | Txn14b   | 20 |
| ENSMUSG00000115938 | Gm17241 | 12 | ENSMUSG0000020250 | Txnrd1   | 20 |
| ENSMUSG00000102997 | Gm17244 | 14 | ENSMUSG0000000811 | Txnrd3   | 19 |
| ENSMUSG0000097309  | Gm17249 | 20 | ENSMUSG0000032175 | Tyk2     | 20 |
| ENSMUSG0000090952  | Gm17251 | 3  | ENSMUSG0000022615 | Tymp     | 20 |
| ENSMUSG0000094108  | Gm17258 | 20 | ENSMUSG0000025747 | Tyms     | 20 |
| ENSMUSG0000097793  | Gm17259 | 20 | ENSMUSG0000027298 | Tyro3    | 3  |
| ENSMUSG0000097305  | Gm17276 | 1  | ENSMUSG0000030579 | Tyrobp   | 19 |
| ENSMUSG0000097604  | Gm17322 | 20 | ENSMUSG0000020087 | Tysnd1   | 20 |
| ENSMUSG0000090317  | Gm17324 | 20 | ENSMUSG0000056310 | Tyw1     | 20 |
| ENSMUSG0000078143  | Gm17344 | 20 | ENSMUSG0000047583 | Tyw3     | 20 |
| ENSMUSG0000091604  | Gm17349 | 20 | ENSMUSG0000048495 | Tyw5     | 9  |
| ENSMUSG0000091985  | Gm17354 | 20 | ENSMUSG0000061613 | U2af1    | 20 |
| ENSMUSG0000078838  | Gm17382 | 9  | ENSMUSG0000078765 | U2af1l4  | 20 |
| ENSMUSG0000058625  | Gm17383 | 20 | ENSMUSG0000030435 | U2af2    | 20 |
| ENSMUSG0000079669  | Gm17396 | 20 | ENSMUSG0000032407 | U2surp   | 20 |
| ENSMUSG0000097000  | Gm17435 | 20 | ENSMUSG0000034485 | Uaca     | 20 |
| ENSMUSG0000092004  | Gm17482 | 20 | ENSMUSG0000026670 | Uap1     | 19 |
| ENSMUSG0000091514  | Gm17484 | 18 | ENSMUSG0000026956 | Uap1l1   | 20 |
| ENSMUSG0000097042  | Gm17491 | 20 | ENSMUSG0000001924 | Uba1     | 1  |
| ENSMUSG0000057359  | Gm17494 | 9  | ENSMUSG0000052997 | Uba2     | 20 |
| ENSMUSG0000097183  | Gm17501 | 20 | ENSMUSG0000030061 | Uba3     | 9  |
| ENSMUSG0000091423  | Gm17509 | 9  | ENSMUSG0000032557 | Uba5     | 20 |
| ENSMUSG0000090460  | Gm17511 | 18 | ENSMUSG0000090137 | Uba52    | 12 |
| ENSMUSG00000103731 | Gm17530 | 12 | ENSMUSG0000061390 | Uba52-ps | 1  |
| ENSMUSG0000091058  | Gm17538 | 18 | ENSMUSG0000035898 | Uba6     | 20 |
| ENSMUSG0000097613  | Gm17597 | 9  | ENSMUSG0000032596 | Uba7     | 20 |
| ENSMUSG0000097482  | Gm17634 | 18 | ENSMUSG0000036352 | Uba1     | 20 |
| ENSMUSG0000097057  | Gm17638 | 20 | ENSMUSG0000041765 | Uba2     | 20 |
| ENSMUSG0000090963  | Gm17655 | 20 | ENSMUSG0000039568 | Ubal1    | 9  |
| ENSMUSG0000091034  | Gm17660 | 1  | ENSMUSG0000050628 | Ubal2    | 12 |
| ENSMUSG0000091695  | Gm17669 | 20 | ENSMUSG0000028437 | Ubap1    | 20 |
| ENSMUSG0000097204  | Gm17690 | 20 | ENSMUSG0000086228 | Ubap1l   | 6  |
| ENSMUSG0000090936  | Gm17705 | 20 | ENSMUSG0000028433 | Ubap2    | 20 |
| ENSMUSG0000091952  | Gm17709 | 20 | ENSMUSG0000042520 | Ubap2l   | 20 |
| ENSMUSG0000097486  | Gm17733 | 20 | ENSMUSG0000032020 | Ubash3b  | 15 |
| ENSMUSG0000098087  | Gm17750 | 20 | ENSMUSG0000019505 | Ubb      | 12 |
| ENSMUSG00000115867 | Gm17753 | 9  | ENSMUSG0000008348 | Ubc      | 20 |
| ENSMUSG0000097987  | Gm17786 | 18 | ENSMUSG0000016308 | Ube2a    | 20 |
| ENSMUSG00000112727 | Gm17794 | 20 | ENSMUSG0000020390 | Ube2b    | 9  |
| ENSMUSG00000118093 | Gm17802 | 9  | ENSMUSG0000032415 | Ube2cbp  | 1  |
| ENSMUSG00000101814 | Gm17807 | 20 | ENSMUSG0000083844 | Ube2d-ps | 20 |
| ENSMUSG00000116919 | Gm17809 | 20 | ENSMUSG0000019927 | Ube2d1   | 20 |
| ENSMUSG00000112239 | Gm17823 | 20 | ENSMUSG0000091896 | Ube2d2a  | 3  |
| ENSMUSG00000106484 | Gm17833 | 20 | ENSMUSG0000078578 | Ube2d3   | 20 |
| ENSMUSG00000112642 | Gm17849 | 20 | ENSMUSG0000021774 | Ube2e1   | 20 |
| ENSMUSG00000111092 | Gm17875 | 19 | ENSMUSG0000058317 | Ube2e2   | 20 |
| ENSMUSG00000107491 | Gm17893 | 20 | ENSMUSG0000027011 | Ube2e3   | 20 |
| ENSMUSG00000108833 | Gm17909 | 12 | ENSMUSG0000034343 | Ube2f    | 20 |

|                    |         |    |                    |           |    |
|--------------------|---------|----|--------------------|-----------|----|
| ENSMUSG00000100515 | Gm17916 | 20 | ENSMUSG00000020794 | Ube2g1    | 20 |
| ENSMUSG00000115632 | Gm17922 | 20 | ENSMUSG00000009293 | Ube2g2    | 1  |
| ENSMUSG00000109384 | Gm17931 | 3  | ENSMUSG00000039159 | Ube2h     | 20 |
| ENSMUSG00000106664 | Gm17936 | 20 | ENSMUSG00000015120 | Ube2i     | 12 |
| ENSMUSG00000101122 | Gm17971 | 20 | ENSMUSG00000028277 | Ube2j1    | 9  |
| ENSMUSG00000104564 | Gm17977 | 20 | ENSMUSG00000023286 | Ube2j2    | 20 |
| ENSMUSG00000101135 | Gm17981 | 20 | ENSMUSG00000029203 | Ube2k     | 3  |
| ENSMUSG00000108647 | Gm17984 | 20 | ENSMUSG00000038965 | Ube2l3    | 20 |
| ENSMUSG00000110422 | Gm17999 | 20 | ENSMUSG00000027078 | Ube2l6    | 20 |
| ENSMUSG00000112779 | Gm18029 | 20 | ENSMUSG00000005575 | Ube2m     | 12 |
| ENSMUSG00000113192 | Gm18032 | 10 | ENSMUSG00000074781 | Ube2n     | 20 |
| ENSMUSG00000113028 | Gm18065 | 20 | ENSMUSG00000106831 | Ube2n-ps1 | 20 |
| ENSMUSG00000117182 | Gm18068 | 9  | ENSMUSG00000059585 | Ube2nl    | 20 |
| ENSMUSG00000115856 | Gm18095 | 20 | ENSMUSG00000020802 | Ube2o     | 9  |
| ENSMUSG00000110726 | Gm18101 | 3  | ENSMUSG00000042572 | Ube2q1    | 1  |
| ENSMUSG00000112918 | Gm18120 | 5  | ENSMUSG00000032307 | Ube2q2    | 20 |
| ENSMUSG00000114340 | Gm18132 | 20 | ENSMUSG00000052981 | Ube2q1    | 19 |
| ENSMUSG00000103601 | Gm18150 | 20 | ENSMUSG00000036241 | Ube2r2    | 20 |
| ENSMUSG00000091277 | Gm1818  | 20 | ENSMUSG00000060860 | Ube2s     | 20 |
| ENSMUSG00000099342 | Gm18180 | 20 | ENSMUSG00000026429 | Ube2t     | 20 |
| ENSMUSG00000112906 | Gm18189 | 20 | ENSMUSG00000078923 | Ube2v1    | 13 |
| ENSMUSG00000098900 | Gm18190 | 20 | ENSMUSG00000022674 | Ube2v2    | 20 |
| ENSMUSG00000109724 | Gm18194 | 20 | ENSMUSG00000025939 | Ube2w     | 1  |
| ENSMUSG00000044285 | Gm1821  | 12 | ENSMUSG00000014349 | Ube2z     | 9  |
| ENSMUSG00000109600 | Gm18212 | 20 | ENSMUSG00000025326 | Ube3a     | 2  |
| ENSMUSG00000111808 | Gm18225 | 20 | ENSMUSG00000029577 | Ube3b     | 20 |
| ENSMUSG00000082028 | Gm1826  | 20 | ENSMUSG00000039000 | Ube3c     | 2  |
| ENSMUSG00000092325 | Gm18284 | 20 | ENSMUSG00000059890 | Ube4a     | 10 |
| ENSMUSG00000114653 | Gm18398 | 3  | ENSMUSG00000028960 | Ube4b     | 9  |
| ENSMUSG00000043192 | Gm1840  | 20 | ENSMUSG00000030870 | Ubfd1     | 20 |
| ENSMUSG00000101054 | Gm18406 | 5  | ENSMUSG00000047719 | Ubiad1    | 20 |
| ENSMUSG00000083892 | Gm1848  | 1  | ENSMUSG00000001687 | Ubl3      | 9  |
| ENSMUSG00000104264 | Gm18529 | 9  | ENSMUSG00000015290 | Ubl4a     | 20 |
| ENSMUSG00000108484 | Gm18537 | 20 | ENSMUSG00000084786 | Ubl5      | 12 |
| ENSMUSG00000110768 | Gm18541 | 20 | ENSMUSG00000055720 | Ubl7      | 20 |
| ENSMUSG00000110123 | Gm18562 | 20 | ENSMUSG00000041231 | Ublcp1    | 20 |
| ENSMUSG00000093402 | Gm18588 | 20 | ENSMUSG00000039473 | Ubn1      | 1  |
| ENSMUSG00000108964 | Gm18600 | 20 | ENSMUSG00000038538 | Ubn2      | 8  |
| ENSMUSG00000110446 | Gm18646 | 20 | ENSMUSG00000027300 | Ubox5     | 9  |
| ENSMUSG00000082070 | Gm1866  | 20 | ENSMUSG00000009741 | Ubp1      | 1  |
| ENSMUSG00000099809 | Gm18665 | 19 | ENSMUSG00000005312 | Ubqln1    | 18 |
| ENSMUSG00000112511 | Gm18704 | 20 | ENSMUSG00000050148 | Ubqln2    | 7  |
| ENSMUSG00000110847 | Gm18705 | 18 | ENSMUSG00000008604 | Ubqln4    | 9  |
| ENSMUSG00000109882 | Gm18706 | 2  | ENSMUSG00000027272 | Ubr1      | 2  |
| ENSMUSG00000116348 | Gm18722 | 20 | ENSMUSG00000023977 | Ubr2      | 20 |
| ENSMUSG00000112218 | Gm18726 | 20 | ENSMUSG00000044308 | Ubr3      | 3  |
| ENSMUSG00000117300 | Gm18736 | 11 | ENSMUSG00000066036 | Ubr4      | 3  |
| ENSMUSG00000112712 | Gm18755 | 20 | ENSMUSG00000037487 | Ubr5      | 11 |
| ENSMUSG00000114705 | Gm18760 | 20 | ENSMUSG00000041712 | Ubr7      | 20 |
| ENSMUSG00000099473 | Gm18775 | 20 | ENSMUSG00000025171 | Ubttd1    | 20 |
| ENSMUSG00000110569 | Gm18860 | 20 | ENSMUSG00000044949 | Ubttd2    | 20 |
| ENSMUSG00000101994 | Gm18875 | 20 | ENSMUSG00000020923 | Ubtfd     | 9  |
| ENSMUSG00000114418 | Gm18883 | 20 | ENSMUSG00000071655 | Ubxn1     | 3  |
| ENSMUSG00000116478 | Gm18890 | 20 | ENSMUSG00000043621 | Ubxn10    | 20 |
| ENSMUSG00000107596 | Gm18913 | 20 | ENSMUSG00000012126 | Ubxn11    | 3  |

|                    |         |    |                    |           |    |
|--------------------|---------|----|--------------------|-----------|----|
| ENSMUSG00000114147 | Gm18939 | 10 | ENSMUSG00000020634 | Ubxn2a    | 18 |
| ENSMUSG00000109472 | Gm18943 | 20 | ENSMUSG00000028243 | Ubxn2b    | 9  |
| ENSMUSG00000115808 | Gm18949 | 20 | ENSMUSG00000026353 | Ubxn4     | 1  |
| ENSMUSG00000113840 | Gm18955 | 20 | ENSMUSG00000019578 | Ubxn6     | 20 |
| ENSMUSG00000100867 | Gm18981 | 20 | ENSMUSG00000053774 | Ubxn7     | 20 |
| ENSMUSG00000114622 | Gm18990 | 20 | ENSMUSG00000052906 | Ubxn8     | 20 |
| ENSMUSG00000110394 | Gm18991 | 3  | ENSMUSG00000029223 | Uchl1     | 9  |
| ENSMUSG00000115040 | Gm18994 | 20 | ENSMUSG00000022111 | Uchl3     | 20 |
| ENSMUSG00000103845 | Gm19026 | 2  | ENSMUSG00000035337 | Uchl4     | 20 |
| ENSMUSG00000100662 | Gm19029 | 20 | ENSMUSG00000018189 | Uchl5     | 20 |
| ENSMUSG00000102232 | Gm19035 | 20 | ENSMUSG00000002550 | Uck1      | 20 |
| ENSMUSG00000107411 | Gm19040 | 20 | ENSMUSG00000026558 | Uck2      | 20 |
| ENSMUSG00000113511 | Gm19046 | 20 | ENSMUSG00000089917 | Uckl1     | 20 |
| ENSMUSG00000111945 | Gm19169 | 20 | ENSMUSG00000010492 | Uckl1os   | 20 |
| ENSMUSG00000113357 | Gm19195 | 20 | ENSMUSG00000026668 | Ucma      | 20 |
| ENSMUSG00000109975 | Gm19196 | 20 | ENSMUSG00000033685 | Ucp2      | 13 |
| ENSMUSG00000113491 | Gm19221 | 20 | ENSMUSG00000032942 | Ucp3      | 20 |
| ENSMUSG00000115238 | Gm19236 | 20 | ENSMUSG00000043262 | Uevld     | 5  |
| ENSMUSG00000107230 | Gm19265 | 20 | ENSMUSG00000062963 | Ufc1      | 20 |
| ENSMUSG00000110238 | Gm19269 | 20 | ENSMUSG00000005262 | Ufd1      | 19 |
| ENSMUSG00000111353 | Gm19324 | 20 | ENSMUSG00000040359 | Ufl1      | 20 |
| ENSMUSG00000101365 | Gm19325 | 20 | ENSMUSG00000027746 | Ufm1      | 20 |
| ENSMUSG00000112789 | Gm19326 | 1  | ENSMUSG00000051502 | Ufsp1     | 20 |
| ENSMUSG00000113776 | Gm19327 | 20 | ENSMUSG00000031634 | Ufsp2     | 1  |
| ENSMUSG00000103307 | Gm19335 | 20 | ENSMUSG00000028381 | Ugcg      | 20 |
| ENSMUSG00000112411 | Gm19337 | 20 | ENSMUSG00000029201 | Ugdh      | 20 |
| ENSMUSG00000092216 | Gm19345 | 20 | ENSMUSG00000037470 | Uggt1     | 20 |
| ENSMUSG00000098492 | Gm19353 | 20 | ENSMUSG00000042104 | Uggt2     | 20 |
| ENSMUSG00000105139 | Gm19391 | 20 | ENSMUSG0000001891  | Ugp2      | 9  |
| ENSMUSG00000106229 | Gm19409 | 1  | ENSMUSG00000090124 | Ugt1a7c   | 20 |
| ENSMUSG00000109372 | Gm19410 | 9  | ENSMUSG00000032854 | Ugt8a     | 16 |
| ENSMUSG00000101438 | Gm19412 | 20 | ENSMUSG00000026667 | Uhmk1     | 18 |
| ENSMUSG00000099310 | Gm19427 | 20 | ENSMUSG0000001228  | Uhrf1     | 20 |
| ENSMUSG00000110528 | Gm1943  | 20 | ENSMUSG00000039512 | Uhrf1bp1  | 18 |
| ENSMUSG00000105843 | Gm19439 | 2  | ENSMUSG00000019951 | Uhrf1bp1l | 3  |
| ENSMUSG00000102498 | Gm19445 | 16 | ENSMUSG00000024817 | Uhrf2     | 20 |
| ENSMUSG00000101693 | Gm19461 | 12 | ENSMUSG00000025878 | Uimc1     | 20 |
| ENSMUSG00000117864 | Gm19500 | 20 | ENSMUSG00000029512 | Ulk1      | 3  |
| ENSMUSG00000108478 | Gm19514 | 20 | ENSMUSG00000004798 | Ulk2      | 1  |
| ENSMUSG00000116903 | Gm19522 | 20 | ENSMUSG00000032308 | Ulk3      | 20 |
| ENSMUSG00000111348 | Gm19531 | 3  | ENSMUSG00000040936 | Ulk4      | 18 |
| ENSMUSG00000104493 | Gm19552 | 20 | ENSMUSG00000089862 | Umad1     | 20 |
| ENSMUSG00000099094 | Gm19569 | 20 | ENSMUSG00000022814 | Umps      | 20 |
| ENSMUSG00000100701 | Gm19587 | 20 | ENSMUSG00000002058 | Unc119    | 9  |
| ENSMUSG00000113585 | Gm19605 | 20 | ENSMUSG00000046562 | Unc119b   | 20 |
| ENSMUSG00000107198 | Gm19619 | 19 | ENSMUSG00000034799 | Unc13a    | 18 |
| ENSMUSG00000073902 | Gm1966  | 20 | ENSMUSG00000028456 | Unc13b    | 1  |
| ENSMUSG00000105766 | Gm19666 | 20 | ENSMUSG00000062151 | Unc13c    | 16 |
| ENSMUSG00000070960 | Gm19680 | 1  | ENSMUSG00000057948 | Unc13d    | 20 |
| ENSMUSG00000097113 | Gm19705 | 20 | ENSMUSG00000030533 | Unc45a    | 20 |
| ENSMUSG00000114593 | Gm19716 | 20 | ENSMUSG00000026111 | Unc50     | 20 |
| ENSMUSG00000102324 | Gm19721 | 9  | ENSMUSG00000025876 | Unc5a     | 20 |
| ENSMUSG00000100706 | Gm19744 | 20 | ENSMUSG00000020099 | Unc5b     | 16 |
| ENSMUSG00000066057 | Gm1976  | 6  | ENSMUSG00000059921 | Unc5c     | 19 |
| ENSMUSG00000099488 | Gm19774 | 20 | ENSMUSG00000063626 | Unc5d     | 17 |

|                    |         |    |                    |         |    |
|--------------------|---------|----|--------------------|---------|----|
| ENSMUSG00000113495 | Gm19792 | 10 | ENSMUSG00000021198 | Unc79   | 7  |
| ENSMUSG00000092223 | Gm19807 | 20 | ENSMUSG00000055567 | Unc80   | 18 |
| ENSMUSG00000111897 | Gm19810 | 9  | ENSMUSG00000036908 | Unc93b1 | 20 |
| ENSMUSG00000093716 | Gm19815 | 12 | ENSMUSG00000029546 | Uncx    | 9  |
| ENSMUSG00000105302 | Gm19817 | 20 | ENSMUSG00000029591 | Ung     | 20 |
| ENSMUSG00000091194 | Gm19840 | 9  | ENSMUSG00000020770 | Unk     | 20 |
| ENSMUSG00000117582 | Gm19853 | 20 | ENSMUSG00000015127 | Unkl    | 20 |
| ENSMUSG00000102650 | Gm19863 | 9  | ENSMUSG00000033427 | Upb1    | 1  |
| ENSMUSG00000102961 | Gm19918 | 20 | ENSMUSG00000058301 | Upf1    | 1  |
| ENSMUSG00000110332 | Gm19935 | 20 | ENSMUSG00000043241 | Upf2    | 1  |
| ENSMUSG00000102331 | Gm19938 | 20 | ENSMUSG00000038398 | Upf3a   | 4  |
| ENSMUSG00000093858 | Gm19967 | 20 | ENSMUSG00000036572 | Upf3b   | 20 |
| ENSMUSG00000112592 | Gm19972 | 20 | ENSMUSG00000006313 | Upk1a   | 20 |
| ENSMUSG00000078193 | Gm2000  | 19 | ENSMUSG00000049436 | Upk1b   | 20 |
| ENSMUSG00000117183 | Gm20008 | 9  | ENSMUSG00000020407 | Upp1    | 20 |
| ENSMUSG00000097640 | Gm20033 | 20 | ENSMUSG00000026839 | Upp2    | 9  |
| ENSMUSG00000093579 | Gm20036 | 20 | ENSMUSG00000073016 | Uprt    | 20 |
| ENSMUSG00000095648 | Gm2004  | 20 | ENSMUSG00000005882 | Uqcc1   | 20 |
| ENSMUSG00000103983 | Gm20045 | 2  | ENSMUSG00000024208 | Uqcc2   | 12 |
| ENSMUSG00000103847 | Gm20056 | 20 | ENSMUSG00000071654 | Uqcc3   | 12 |
| ENSMUSG00000113429 | Gm20063 | 1  | ENSMUSG00000059534 | Uqcr10  | 12 |
| ENSMUSG00000114133 | Gm20075 | 20 | ENSMUSG00000020163 | Uqcr11  | 12 |
| ENSMUSG00000108778 | Gm20083 | 20 | ENSMUSG00000021520 | Uqcrb   | 12 |
| ENSMUSG00000117385 | Gm20147 | 20 | ENSMUSG00000025651 | Uqcrc1  | 20 |
| ENSMUSG00000103483 | Gm20162 | 1  | ENSMUSG00000030884 | Uqcrc2  | 20 |
| ENSMUSG00000110611 | Gm20163 | 20 | ENSMUSG00000038462 | Uqcrfs1 | 20 |
| ENSMUSG00000104257 | Gm20172 | 20 | ENSMUSG00000063882 | Uqcrh   | 12 |
| ENSMUSG00000106874 | Gm20186 | 20 | ENSMUSG00000044894 | Uqcrq   | 12 |
| ENSMUSG00000112390 | Gm20208 | 20 | ENSMUSG00000039929 | Urb1    | 1  |
| ENSMUSG00000110218 | Gm20219 | 13 | ENSMUSG00000031976 | Urb2    | 20 |
| ENSMUSG00000114503 | Gm20242 | 9  | ENSMUSG00000049680 | Urgcp   | 20 |
| ENSMUSG00000102059 | Gm20257 | 20 | ENSMUSG00000030421 | Uri1    | 20 |
| ENSMUSG00000112795 | Gm2027  | 9  | ENSMUSG00000069020 | Urm1    | 20 |
| ENSMUSG00000108551 | Gm20274 | 20 | ENSMUSG00000028684 | Urod    | 20 |
| ENSMUSG00000110986 | Gm20276 | 20 | ENSMUSG00000030979 | Uros    | 20 |
| ENSMUSG00000111080 | Gm20300 | 3  | ENSMUSG00000031792 | Usb1    | 20 |
| ENSMUSG00000101599 | Gm20342 | 1  | ENSMUSG00000002395 | Use1    | 3  |
| ENSMUSG00000108264 | Gm20371 | 4  | ENSMUSG00000026641 | Usf1    | 20 |
| ENSMUSG00000107412 | Gm20383 | 20 | ENSMUSG00000058239 | Usf2    | 9  |
| ENSMUSG00000092603 | Gm20386 | 20 | ENSMUSG00000068284 | Usf3    | 10 |
| ENSMUSG00000092448 | Gm20387 | 20 | ENSMUSG00000030838 | Ush1c   | 20 |
| ENSMUSG00000092509 | Gm20394 | 20 | ENSMUSG00000034911 | Ushbp1  | 20 |
| ENSMUSG00000092405 | Gm20402 | 20 | ENSMUSG00000029407 | Uso1    | 3  |
| ENSMUSG00000092495 | Gm20405 | 20 | ENSMUSG00000028560 | Usp1    | 20 |
| ENSMUSG00000092181 | Gm20432 | 20 | ENSMUSG00000031826 | Usp10   | 20 |
| ENSMUSG00000092258 | Gm20444 | 20 | ENSMUSG00000031066 | Usp11   | 20 |
| ENSMUSG00000092394 | Gm20445 | 20 | ENSMUSG00000029640 | Usp12   | 4  |
| ENSMUSG00000092592 | Gm20449 | 20 | ENSMUSG00000056900 | Usp13   | 3  |
| ENSMUSG00000092187 | Gm20457 | 20 | ENSMUSG00000047879 | Usp14   | 9  |
| ENSMUSG00000092395 | Gm20463 | 9  | ENSMUSG00000020124 | Usp15   | 3  |
| ENSMUSG00000092565 | Gm20477 | 20 | ENSMUSG00000025616 | Usp16   | 20 |
| ENSMUSG00000092549 | Gm20491 | 20 | ENSMUSG00000030107 | Usp18   | 20 |
| ENSMUSG00000092593 | Gm20492 | 20 | ENSMUSG0000006676  | Usp19   | 9  |
| ENSMUSG00000021139 | Gm20498 | 20 | ENSMUSG00000032010 | Usp2    | 9  |
| ENSMUSG00000092536 | Gm20501 | 20 | ENSMUSG00000026854 | Usp20   | 3  |

|                    |         |    |                   |        |    |
|--------------------|---------|----|-------------------|--------|----|
| ENSMUSG0000092371  | Gm20511 | 20 | ENSMUSG0000053483 | Usp21  | 9  |
| ENSMUSG0000092242  | Gm20515 | 20 | ENSMUSG0000042506 | Usp22  | 1  |
| ENSMUSG0000023984  | Gm20517 | 20 | ENSMUSG0000028514 | Usp24  | 2  |
| ENSMUSG0000092470  | Gm20518 | 20 | ENSMUSG0000022867 | Usp25  | 1  |
| ENSMUSG0000092241  | Gm20522 | 20 | ENSMUSG0000046269 | Usp27x | 20 |
| ENSMUSG0000092373  | Gm20535 | 20 | ENSMUSG0000032267 | Usp28  | 9  |
| ENSMUSG0000092386  | Gm20536 | 20 | ENSMUSG0000051527 | Usp29  | 9  |
| ENSMUSG0000092569  | Gm20544 | 18 | ENSMUSG0000032376 | Usp3   | 19 |
| ENSMUSG0000092354  | Gm20548 | 20 | ENSMUSG0000029592 | Usp30  | 20 |
| ENSMUSG00000115161 | Gm20555 | 20 | ENSMUSG0000063317 | Usp31  | 12 |
| ENSMUSG00000106734 | Gm20559 | 20 | ENSMUSG0000000804 | Usp32  | 3  |
| ENSMUSG00000105233 | Gm20568 | 20 | ENSMUSG0000025437 | Usp33  | 20 |
| ENSMUSG0000074903  | Gm2058  | 20 | ENSMUSG0000056342 | Usp34  | 16 |
| ENSMUSG0000096887  | Gm20594 | 20 | ENSMUSG0000035713 | Usp35  | 20 |
| ENSMUSG0000041716  | Gm20604 | 3  | ENSMUSG0000033909 | Usp36  | 20 |
| ENSMUSG0000029720  | Gm20605 | 1  | ENSMUSG0000033364 | Usp37  | 20 |
| ENSMUSG0000097615  | Gm2061  | 12 | ENSMUSG0000038250 | Usp38  | 20 |
| ENSMUSG0000093507  | Gm20627 | 20 | ENSMUSG0000032612 | Usp4   | 20 |
| ENSMUSG0000093656  | Gm20628 | 13 | ENSMUSG0000005501 | Usp40  | 20 |
| ENSMUSG0000093577  | Gm20632 | 20 | ENSMUSG0000051306 | Usp42  | 12 |
| ENSMUSG0000093553  | Gm20633 | 20 | ENSMUSG0000020905 | Usp43  | 20 |
| ENSMUSG0000070392  | Gm20634 | 10 | ENSMUSG0000040455 | Usp45  | 4  |
| ENSMUSG0000093720  | Gm20635 | 1  | ENSMUSG0000054814 | Usp46  | 20 |
| ENSMUSG0000093436  | Gm20646 | 9  | ENSMUSG0000059263 | Usp47  | 1  |
| ENSMUSG0000093672  | Gm20655 | 12 | ENSMUSG0000043411 | Usp48  | 9  |
| ENSMUSG0000079323  | Gm20661 | 20 | ENSMUSG0000090115 | Usp49  | 20 |
| ENSMUSG0000093465  | Gm20682 | 9  | ENSMUSG0000038429 | Usp5   | 20 |
| ENSMUSG0000093405  | Gm20684 | 20 | ENSMUSG0000027364 | Usp50  | 20 |
| ENSMUSG0000093384  | Gm20689 | 20 | ENSMUSG0000067215 | Usp51  | 20 |
| ENSMUSG0000093505  | Gm20691 | 20 | ENSMUSG0000039701 | Usp53  | 9  |
| ENSMUSG0000030068  | Gm20696 | 9  | ENSMUSG0000034235 | Usp54  | 15 |
| ENSMUSG0000093622  | Gm20703 | 20 | ENSMUSG0000039046 | Usp6nl | 9  |
| ENSMUSG0000093559  | Gm20705 | 7  | ENSMUSG0000022710 | Usp7   | 2  |
| ENSMUSG0000093594  | Gm20707 | 20 | ENSMUSG0000027363 | Usp8   | 19 |
| ENSMUSG0000093677  | Gm20712 | 20 | ENSMUSG0000031010 | Usp9x  | 2  |
| ENSMUSG0000045929  | Gm20715 | 9  | ENSMUSG0000041264 | Uspl1  | 20 |
| ENSMUSG0000090625  | Gm20721 | 18 | ENSMUSG0000047712 | Ust    | 1  |
| ENSMUSG00000102912 | Gm20731 | 20 | ENSMUSG0000028907 | Utp11  | 3  |
| ENSMUSG0000093387  | Gm20732 | 20 | ENSMUSG0000063785 | Utp14a | 19 |
| ENSMUSG00000104117 | Gm20743 | 20 | ENSMUSG0000079470 | Utp14b | 16 |
| ENSMUSG00000110016 | Gm20751 | 20 | ENSMUSG0000041747 | Utp15  | 20 |
| ENSMUSG00000103428 | Gm20754 | 5  | ENSMUSG0000054079 | Utp18  | 9  |
| ENSMUSG0000098092  | Gm2076  | 9  | ENSMUSG0000004356 | Utp20  | 2  |
| ENSMUSG00000118197 | Gm20762 | 7  | ENSMUSG0000022313 | Utp23  | 9  |
| ENSMUSG00000106190 | Gm20768 | 20 | ENSMUSG0000016181 | Utp25  | 20 |
| ENSMUSG0000094421  | Gm20778 | 20 | ENSMUSG0000070697 | Utp3   | 20 |
| ENSMUSG0000093800  | Gm20796 | 2  | ENSMUSG0000041438 | Utp4   | 20 |
| ENSMUSG0000078180  | Gm20900 | 20 | ENSMUSG0000035575 | Utp6   | 20 |
| ENSMUSG0000095193  | Gm20939 | 19 | ENSMUSG0000019820 | Utrn   | 9  |
| ENSMUSG0000095403  | Gm21092 | 20 | ENSMUSG0000068457 | Uty    | 20 |
| ENSMUSG0000096256  | Gm21093 | 12 | ENSMUSG0000035354 | Uvrag  | 20 |
| ENSMUSG0000095294  | Gm21119 | 10 | ENSMUSG0000037355 | Uvssa  | 1  |
| ENSMUSG0000097789  | Gm2115  | 20 | ENSMUSG0000057363 | Uxs1   | 20 |
| ENSMUSG00000104651 | Gm21168 | 20 | ENSMUSG0000001134 | Uxt    | 20 |
| ENSMUSG00000112975 | Gm21297 | 1  | ENSMUSG0000010936 | Vac14  | 20 |

|                    |         |    |                    |           |    |
|--------------------|---------|----|--------------------|-----------|----|
| ENSMUSG00000103713 | Gm2136  | 20 | ENSMUSG00000030337 | Vamp1     | 18 |
| ENSMUSG00000114940 | Gm21378 | 20 | ENSMUSG00000020894 | Vamp2     | 20 |
| ENSMUSG00000094530 | Gm21399 | 20 | ENSMUSG00000028955 | Vamp3     | 20 |
| ENSMUSG00000097288 | Gm2155  | 20 | ENSMUSG00000026696 | Vamp4     | 6  |
| ENSMUSG00000113280 | Gm21559 | 20 | ENSMUSG00000051412 | Vamp7     | 18 |
| ENSMUSG00000096006 | Gm21596 | 12 | ENSMUSG00000105078 | Vamp9     | 20 |
| ENSMUSG00000098760 | Gm2164  | 19 | ENSMUSG00000027860 | Vangl1    | 18 |
| ENSMUSG00000116840 | Gm21691 | 20 | ENSMUSG00000026556 | Vangl2    | 9  |
| ENSMUSG00000095280 | Gm21738 | 20 | ENSMUSG00000024091 | Vapa      | 20 |
| ENSMUSG00000110458 | Gm21769 | 20 | ENSMUSG00000054455 | Vapb      | 18 |
| ENSMUSG00000095123 | Gm21781 | 20 | ENSMUSG00000007029 | Vars      | 20 |
| ENSMUSG00000096401 | Gm21811 | 20 | ENSMUSG00000038838 | Vars2     | 20 |
| ENSMUSG00000096299 | Gm21814 | 20 | ENSMUSG00000021256 | Vash1     | 10 |
| ENSMUSG00000096870 | Gm21816 | 20 | ENSMUSG00000037568 | Vash2     | 18 |
| ENSMUSG00000095651 | Gm21817 | 1  | ENSMUSG00000039646 | Vasn      | 20 |
| ENSMUSG00000094030 | Gm21833 | 1  | ENSMUSG00000030403 | Vasp      | 20 |
| ENSMUSG00000095913 | Gm21844 | 20 | ENSMUSG00000034993 | Vat1      | 20 |
| ENSMUSG00000094832 | Gm21846 | 3  | ENSMUSG00000046844 | Vat1l     | 3  |
| ENSMUSG00000095366 | Gm21860 | 20 | ENSMUSG00000065145 | Vaultrc5  | 10 |
| ENSMUSG00000095562 | Gm21887 | 20 | ENSMUSG00000034116 | Vav1      | 20 |
| ENSMUSG00000116995 | Gm21926 | 20 | ENSMUSG00000009621 | Vav2      | 9  |
| ENSMUSG00000095334 | Gm21984 | 20 | ENSMUSG00000033721 | Vav3      | 18 |
| ENSMUSG00000096056 | Gm21986 | 20 | ENSMUSG00000006270 | Vax1      | 9  |
| ENSMUSG00000083829 | Gm2199  | 20 | ENSMUSG00000034777 | Vax2      | 20 |
| ENSMUSG00000096370 | Gm21992 | 12 | ENSMUSG00000031197 | Vbp1      | 9  |
| ENSMUSG00000075833 | Gm22003 | 10 | ENSMUSG00000027962 | Vcam1     | 13 |
| ENSMUSG00000089417 | Gm22009 | 10 | ENSMUSG00000021614 | Vcan      | 20 |
| ENSMUSG00000084686 | Gm22027 | 10 | ENSMUSG00000021823 | Vcl       | 7  |
| ENSMUSG00000064923 | Gm22042 | 20 | ENSMUSG00000028452 | Vcp       | 3  |
| ENSMUSG00000065327 | Gm22058 | 20 | ENSMUSG00000083327 | Vcp-rs    | 20 |
| ENSMUSG00000084739 | Gm22067 | 20 | ENSMUSG00000045210 | Vcpip1    | 3  |
| ENSMUSG00000096205 | Gm22068 | 20 | ENSMUSG00000049882 | Vcpkmt    | 20 |
| ENSMUSG00000093334 | Gm22118 | 2  | ENSMUSG00000020402 | Vdac1     | 11 |
| ENSMUSG00000065778 | Gm22154 | 10 | ENSMUSG00000021771 | Vdac2     | 20 |
| ENSMUSG00000079297 | Gm2223  | 20 | ENSMUSG00000008892 | Vdac3     | 20 |
| ENSMUSG00000064410 | Gm22247 | 10 | ENSMUSG00000075053 | Vdac3-ps1 | 20 |
| ENSMUSG00000110057 | Gm2225  | 20 | ENSMUSG00000022479 | Vdr       | 20 |
| ENSMUSG00000096866 | Gm22260 | 20 | ENSMUSG00000023951 | Vegfa     | 18 |
| ENSMUSG00000094131 | Gm22265 | 10 | ENSMUSG00000024962 | Vegfb     | 20 |
| ENSMUSG00000077222 | Gm22270 | 10 | ENSMUSG00000031520 | Vegfc     | 20 |
| ENSMUSG00000064620 | Gm22303 | 10 | ENSMUSG00000031380 | Vegfd     | 20 |
| ENSMUSG00000064626 | Gm22306 | 10 | ENSMUSG00000036099 | Vezt      | 1  |
| ENSMUSG00000088633 | Gm22313 | 12 | ENSMUSG00000037428 | Vgf       | 20 |
| ENSMUSG00000096206 | Gm22317 | 20 | ENSMUSG00000049641 | Vgll2     | 1  |
| ENSMUSG00000088699 | Gm22328 | 20 | ENSMUSG00000091243 | Vgll3     | 20 |
| ENSMUSG00000065036 | Gm22362 | 10 | ENSMUSG00000030315 | Vgll4     | 20 |
| ENSMUSG00000077772 | Gm22373 | 20 | ENSMUSG00000033933 | Vhl       | 20 |
| ENSMUSG00000103138 | Gm2238  | 13 | ENSMUSG00000026175 | Vil1      | 20 |
| ENSMUSG00000092666 | Gm22408 | 9  | ENSMUSG00000038775 | Vill      | 1  |
| ENSMUSG00000064994 | Gm22422 | 10 | ENSMUSG00000026728 | Vim       | 1  |
| ENSMUSG00000087881 | Gm22442 | 10 | ENSMUSG00000019772 | Vip       | 20 |
| ENSMUSG00000080465 | Gm22486 | 10 | ENSMUSG00000021038 | Vipas39   | 20 |
| ENSMUSG00000077681 | Gm22496 | 20 | ENSMUSG00000032528 | Vipr1     | 9  |
| ENSMUSG00000089607 | Gm22500 | 20 | ENSMUSG00000011171 | Vipr2     | 18 |
| ENSMUSG00000089606 | Gm22501 | 20 | ENSMUSG00000040720 | Virma     | 7  |



|                   |         |    |                    |            |    |
|-------------------|---------|----|--------------------|------------|----|
| ENSMUSG0000064890 | Gm22505 | 20 | ENSMUSG0000098320  | Vis1       | 20 |
| ENSMUSG0000096349 | Gm22513 | 10 | ENSMUSG0000024076  | Vit        | 20 |
| ENSMUSG0000088891 | Gm22516 | 20 | ENSMUSG0000096145  | Vkorc1     | 12 |
| ENSMUSG0000110244 | Gm2253  | 20 | ENSMUSG0000066735  | Vkorc111   | 20 |
| ENSMUSG0000089447 | Gm22532 | 20 | ENSMUSG0000024924  | Vldlr      | 10 |
| ENSMUSG0000089446 | Gm22533 | 20 | ENSMUSG0000073131  | Vma21      | 9  |
| ENSMUSG0000088793 | Gm22540 | 20 | ENSMUSG0000054723  | Vmac       | 20 |
| ENSMUSG0000077535 | Gm22543 | 20 | ENSMUSG0000064259  | Vmn1r13    | 20 |
| ENSMUSG0000065661 | Gm22580 | 20 | ENSMUSG00000100586 | Vmn1r90    | 1  |
| ENSMUSG0000065669 | Gm22581 | 20 | ENSMUSG0000074164  | Vmn2r-ps54 | 20 |
| ENSMUSG0000088226 | Gm22596 | 20 | ENSMUSG0000027824  | Vmn2r1     | 1  |
| ENSMUSG0000084628 | Gm22613 | 20 | ENSMUSG0000095093  | Vmn2r111   | 20 |
| ENSMUSG0000094452 | Gm22623 | 20 | ENSMUSG0000072778  | Vmn2r27    | 9  |
| ENSMUSG0000088769 | Gm22637 | 20 | ENSMUSG0000095730  | Vmn2r29    | 20 |
| ENSMUSG0000092879 | Gm22650 | 18 | ENSMUSG0000096002  | Vmn2r53    | 20 |
| ENSMUSG0000077380 | Gm22661 | 20 | ENSMUSG0000090762  | Vmn2r56    | 9  |
| ENSMUSG0000089343 | Gm22667 | 20 | ENSMUSG0000066537  | Vmn2r57    | 20 |
| ENSMUSG0000065788 | Gm22682 | 20 | ENSMUSG0000070601  | Vmn2r84    | 3  |
| ENSMUSG0000064782 | Gm22685 | 20 | ENSMUSG0000092048  | Vmn2r85    | 3  |
| ENSMUSG0000080543 | Gm22709 | 20 | ENSMUSG0000092162  | Vmn2r86    | 2  |
| ENSMUSG0000080544 | Gm22714 | 20 | ENSMUSG0000091511  | Vmn2r87    | 3  |
| ENSMUSG0000095178 | Gm22716 | 20 | ENSMUSG0000018171  | Vmp1       | 1  |
| ENSMUSG0000088712 | Gm22728 | 20 | ENSMUSG0000037788  | Vopp1      | 2  |
| ENSMUSG0000088711 | Gm22731 | 20 | ENSMUSG0000032127  | Vps11      | 20 |
| ENSMUSG0000065374 | Gm22738 | 20 | ENSMUSG0000046230  | Vps13a     | 3  |
| ENSMUSG0000065371 | Gm22739 | 9  | ENSMUSG0000037646  | Vps13b     | 7  |
| ENSMUSG0000064427 | Gm22748 | 10 | ENSMUSG0000035284  | Vps13c     | 3  |
| ENSMUSG0000065591 | Gm22753 | 10 | ENSMUSG0000020220  | Vps13d     | 19 |
| ENSMUSG0000087768 | Gm22755 | 1  | ENSMUSG0000027411  | Vps16      | 20 |
| ENSMUSG0000088990 | Gm22767 | 10 | ENSMUSG0000034216  | Vps18      | 20 |
| ENSMUSG0000077276 | Gm22784 | 18 | ENSMUSG0000078656  | Vps25      | 20 |
| ENSMUSG0000077274 | Gm22786 | 10 | ENSMUSG0000020078  | Vps26a     | 19 |
| ENSMUSG0000065926 | Gm22798 | 20 | ENSMUSG0000031988  | Vps26b     | 9  |
| ENSMUSG0000089061 | Gm22839 | 20 | ENSMUSG0000022898  | Vps26c     | 9  |
| ENSMUSG0000092713 | Gm22858 | 20 | ENSMUSG00000115987 | Vps28      | 20 |
| ENSMUSG0000065883 | Gm22865 | 20 | ENSMUSG0000029462  | Vps29      | 20 |
| ENSMUSG0000088001 | Gm22883 | 10 | ENSMUSG0000029434  | Vps33a     | 20 |
| ENSMUSG0000096346 | Gm22887 | 20 | ENSMUSG0000030534  | Vps33b     | 19 |
| ENSMUSG0000089265 | Gm22888 | 20 | ENSMUSG0000031696  | Vps35      | 4  |
| ENSMUSG0000089185 | Gm22940 | 20 | ENSMUSG0000030982  | Vps35l     | 20 |
| ENSMUSG0000080370 | Gm22952 | 20 | ENSMUSG0000031479  | Vps36      | 20 |
| ENSMUSG0000080374 | Gm22953 | 20 | ENSMUSG0000031600  | Vps37a     | 12 |
| ENSMUSG0000084460 | Gm22957 | 20 | ENSMUSG0000066278  | Vps37b     | 9  |
| ENSMUSG0000094229 | Gm22969 | 20 | ENSMUSG0000048832  | Vps37c     | 20 |
| ENSMUSG0000065232 | Gm22973 | 20 | ENSMUSG0000043614  | Vps37d     | 20 |
| ENSMUSG0000064542 | Gm22980 | 20 | ENSMUSG0000027291  | Vps39      | 20 |
| ENSMUSG0000064779 | Gm22997 | 10 | ENSMUSG0000041236  | Vps41      | 18 |
| ENSMUSG0000064738 | Gm23054 | 20 | ENSMUSG0000015747  | Vps45      | 20 |
| ENSMUSG0000076305 | Gm23063 | 10 | ENSMUSG0000031913  | Vps4a      | 20 |
| ENSMUSG0000092257 | Gm2308  | 20 | ENSMUSG0000009907  | Vps4b      | 20 |
| ENSMUSG0000088176 | Gm23094 | 20 | ENSMUSG0000001376  | Vps50      | 4  |
| ENSMUSG0000089103 | Gm23114 | 20 | ENSMUSG0000024797  | Vps51      | 20 |
| ENSMUSG0000089235 | Gm23119 | 20 | ENSMUSG0000024319  | Vps52      | 20 |
| ENSMUSG0000088278 | Gm23121 | 20 | ENSMUSG0000017288  | Vps53      | 20 |
| ENSMUSG0000077990 | Gm23134 | 20 | ENSMUSG0000020128  | Vps54      | 20 |

|                    |         |    |                    |         |    |
|--------------------|---------|----|--------------------|---------|----|
| ENSMUSG00000095868 | Gm23136 | 20 | ENSMUSG0000008958  | Vps72   | 20 |
| ENSMUSG00000065299 | Gm23138 | 19 | ENSMUSG00000033653 | Vps8    | 20 |
| ENSMUSG00000094405 | Gm23143 | 10 | ENSMUSG00000001062 | Vps9d1  | 20 |
| ENSMUSG00000093830 | Gm23145 | 10 | ENSMUSG00000021115 | Vrk1    | 9  |
| ENSMUSG00000093064 | Gm23153 | 20 | ENSMUSG00000064090 | Vrk2    | 20 |
| ENSMUSG00000092829 | Gm23159 | 20 | ENSMUSG00000002205 | Vrk3    | 20 |
| ENSMUSG00000087782 | Gm23169 | 20 | ENSMUSG00000071235 | Vrtn    | 20 |
| ENSMUSG00000087785 | Gm23172 | 20 | ENSMUSG00000066894 | Vsig10  | 18 |
| ENSMUSG00000084544 | Gm23183 | 20 | ENSMUSG00000070604 | Vsig10l | 20 |
| ENSMUSG00000111554 | Gm232   | 20 | ENSMUSG00000001943 | Vsig2   | 20 |
| ENSMUSG00000077567 | Gm23200 | 20 | ENSMUSG00000020101 | Vsir    | 20 |
| ENSMUSG00000077565 | Gm23201 | 10 | ENSMUSG00000054459 | Vsn1    | 19 |
| ENSMUSG00000077564 | Gm23202 | 10 | ENSMUSG00000048834 | Vstm2a  | 1  |
| ENSMUSG00000089296 | Gm23205 | 20 | ENSMUSG00000039257 | Vstm2b  | 20 |
| ENSMUSG00000089292 | Gm23209 | 20 | ENSMUSG00000037843 | Vstm2l  | 20 |
| ENSMUSG00000084664 | Gm23213 | 20 | ENSMUSG00000050666 | Vstm4   | 20 |
| ENSMUSG00000064941 | Gm23238 | 20 | ENSMUSG00000031937 | Vstm5   | 20 |
| ENSMUSG00000064943 | Gm23240 | 20 | ENSMUSG00000019868 | Vta1    | 9  |
| ENSMUSG00000065304 | Gm23245 | 10 | ENSMUSG00000051076 | Vtcn1   | 3  |
| ENSMUSG00000088942 | Gm23260 | 20 | ENSMUSG00000024983 | Vti1a   | 20 |
| ENSMUSG00000064486 | Gm23293 | 12 | ENSMUSG00000021124 | Vti1b   | 1  |
| ENSMUSG00000065118 | Gm23297 | 10 | ENSMUSG00000017344 | Vtn     | 20 |
| ENSMUSG00000064647 | Gm23301 | 10 | ENSMUSG00000042116 | Vwa1    | 20 |
| ENSMUSG00000065752 | Gm23344 | 1  | ENSMUSG00000030889 | Vwa3a   | 14 |
| ENSMUSG00000065750 | Gm23346 | 20 | ENSMUSG00000050122 | Vwa3b   | 14 |
| ENSMUSG00000094726 | Gm23355 | 10 | ENSMUSG00000023186 | Vwa5a   | 1  |
| ENSMUSG00000093262 | Gm23413 | 20 | ENSMUSG00000028753 | Vwa5b1  | 13 |
| ENSMUSG00000077194 | Gm23431 | 20 | ENSMUSG00000046613 | Vwa5b2  | 9  |
| ENSMUSG00000064853 | Gm23442 | 10 | ENSMUSG00000007030 | Vwa7    | 1  |
| ENSMUSG00000065198 | Gm23462 | 20 | ENSMUSG00000058997 | Vwa8    | 12 |
| ENSMUSG00000084417 | Gm23463 | 20 | ENSMUSG00000050830 | Vwc2    | 18 |
| ENSMUSG00000094050 | Gm23472 | 14 | ENSMUSG00000045648 | Vwc2l   | 18 |
| ENSMUSG00000089508 | Gm23473 | 20 | ENSMUSG00000043789 | Vwce    | 20 |
| ENSMUSG00000080485 | Gm23493 | 20 | ENSMUSG00000001930 | Vwf     | 20 |
| ENSMUSG00000065836 | Gm23502 | 9  | ENSMUSG00000067879 | Vxn     | 5  |
| ENSMUSG00000065014 | Gm23509 | 20 | ENSMUSG00000024283 | Wac     | 2  |
| ENSMUSG00000065018 | Gm23511 | 10 | ENSMUSG00000041408 | Wapl    | 2  |
| ENSMUSG00000088836 | Gm23546 | 20 | ENSMUSG00000021266 | Wars    | 20 |
| ENSMUSG00000088835 | Gm23547 | 12 | ENSMUSG00000004233 | Wars2   | 20 |
| ENSMUSG00000088442 | Gm23553 | 20 | ENSMUSG00000031165 | Was     | 20 |
| ENSMUSG00000096882 | Gm23570 | 20 | ENSMUSG00000019831 | Wasf1   | 18 |
| ENSMUSG00000089158 | Gm23583 | 20 | ENSMUSG00000028868 | Wasf2   | 20 |
| ENSMUSG00000077733 | Gm23608 | 20 | ENSMUSG00000029636 | Wasf3   | 20 |
| ENSMUSG00000092819 | Gm23639 | 10 | ENSMUSG00000024101 | Washc1  | 2  |
| ENSMUSG00000084572 | Gm23657 | 9  | ENSMUSG00000024104 | Washc2  | 20 |
| ENSMUSG00000096391 | Gm23686 | 20 | ENSMUSG00000020056 | Washc3  | 20 |
| ENSMUSG00000075829 | Gm23692 | 20 | ENSMUSG00000034560 | Washc4  | 20 |
| ENSMUSG00000089465 | Gm23702 | 20 | ENSMUSG00000022350 | Washc5  | 3  |
| ENSMUSG00000064936 | Gm23722 | 12 | ENSMUSG00000029684 | Wasl    | 20 |
| ENSMUSG00000065687 | Gm23734 | 10 | ENSMUSG00000030035 | Wbp1    | 20 |
| ENSMUSG00000088208 | Gm23751 | 10 | ENSMUSG00000030216 | Wbp11   | 20 |
| ENSMUSG00000088972 | Gm23761 | 20 | ENSMUSG00000047731 | Wbp1l   | 1  |
| ENSMUSG00000094826 | Gm23804 | 20 | ENSMUSG00000034341 | Wbp2    | 2  |
| ENSMUSG00000092898 | Gm23806 | 10 | ENSMUSG00000022023 | Wbp4    | 20 |
| ENSMUSG00000092896 | Gm23811 | 20 | ENSMUSG00000054909 | Wbscr25 | 20 |

|                    |         |    |                    |          |    |
|--------------------|---------|----|--------------------|----------|----|
| ENSMUSG00000065764 | Gm23850 | 20 | ENSMUSG00000051721 | Wdcp     | 20 |
| ENSMUSG00000093921 | Gm23864 | 20 | ENSMUSG00000073643 | Wdfy1    | 1  |
| ENSMUSG00000115457 | Gm2387  | 20 | ENSMUSG00000014547 | Wdfy2    | 3  |
| ENSMUSG00000093170 | Gm23873 | 20 | ENSMUSG00000043940 | Wdfy3    | 3  |
| ENSMUSG00000084632 | Gm23887 | 12 | ENSMUSG00000051506 | Wdfy4    | 20 |
| ENSMUSG00000092997 | Gm23917 | 9  | ENSMUSG00000037572 | Wdhd1    | 20 |
| ENSMUSG00000096297 | Gm23934 | 3  | ENSMUSG00000020319 | Wdpcp    | 20 |
| ENSMUSG00000076258 | Gm23935 | 20 | ENSMUSG00000005103 | Wdr1     | 19 |
| ENSMUSG00000077611 | Gm23946 | 10 | ENSMUSG00000042055 | Wdr11    | 20 |
| ENSMUSG00000095624 | Gm23947 | 10 | ENSMUSG00000026019 | Wdr12    | 20 |
| ENSMUSG00000087836 | Gm23956 | 20 | ENSMUSG00000031166 | Wdr13    | 9  |
| ENSMUSG00000065251 | Gm23971 | 10 | ENSMUSG00000039375 | Wdr17    | 9  |
| ENSMUSG00000080680 | Gm23989 | 20 | ENSMUSG00000035754 | Wdr18    | 1  |
| ENSMUSG00000088682 | Gm23999 | 20 | ENSMUSG00000037890 | Wdr19    | 20 |
| ENSMUSG00000088359 | Gm24009 | 20 | ENSMUSG00000037957 | Wdr20    | 20 |
| ENSMUSG00000095023 | Gm24019 | 20 | ENSMUSG00000025737 | Wdr24    | 20 |
| ENSMUSG00000089242 | Gm24056 | 20 | ENSMUSG00000040877 | Wdr25    | 20 |
| ENSMUSG00000088118 | Gm24059 | 20 | ENSMUSG00000038733 | Wdr26    | 20 |
| ENSMUSG00000088119 | Gm24060 | 12 | ENSMUSG00000046991 | Wdr27    | 20 |
| ENSMUSG00000095491 | Gm24088 | 3  | ENSMUSG00000033285 | Wdr3     | 20 |
| ENSMUSG00000096563 | Gm24095 | 20 | ENSMUSG00000028391 | Wdr31    | 10 |
| ENSMUSG00000077167 | Gm24119 | 10 | ENSMUSG00000024400 | Wdr33    | 20 |
| ENSMUSG00000089161 | Gm24130 | 10 | ENSMUSG00000039715 | Wdr34    | 3  |
| ENSMUSG00000064566 | Gm24144 | 20 | ENSMUSG00000066643 | Wdr35    | 1  |
| ENSMUSG00000064565 | Gm24145 | 20 | ENSMUSG00000038299 | Wdr36    | 20 |
| ENSMUSG00000064694 | Gm24146 | 10 | ENSMUSG00000021147 | Wdr37    | 2  |
| ENSMUSG00000086119 | Gm2415  | 19 | ENSMUSG00000035295 | Wdr38    | 20 |
| ENSMUSG00000093006 | Gm24157 | 20 | ENSMUSG00000024037 | Wdr4     | 20 |
| ENSMUSG00000088609 | Gm24187 | 20 | ENSMUSG00000042015 | Wdr41    | 9  |
| ENSMUSG00000088600 | Gm24189 | 20 | ENSMUSG00000041057 | Wdr43    | 1  |
| ENSMUSG00000080455 | Gm24194 | 20 | ENSMUSG00000036769 | Wdr44    | 20 |
| ENSMUSG00000082305 | Gm2420  | 1  | ENSMUSG00000039382 | Wdr45    | 20 |
| ENSMUSG00000061724 | Gm2423  | 9  | ENSMUSG00000025173 | Wdr45b   | 18 |
| ENSMUSG00000077505 | Gm24233 | 10 | ENSMUSG00000024312 | Wdr46    | 20 |
| ENSMUSG00000087943 | Gm24245 | 10 | ENSMUSG00000105893 | Wdr46-ps | 20 |
| ENSMUSG00000065675 | Gm24260 | 10 | ENSMUSG00000040389 | Wdr47    | 4  |
| ENSMUSG00000096243 | Gm24265 | 10 | ENSMUSG00000032512 | Wdr48    | 20 |
| ENSMUSG00000076281 | Gm24270 | 20 | ENSMUSG00000104301 | Wdr49    | 14 |
| ENSMUSG00000088254 | Gm24289 | 10 | ENSMUSG00000026917 | Wdr5     | 20 |
| ENSMUSG00000064822 | Gm24292 | 10 | ENSMUSG00000022787 | Wdr53    | 20 |
| ENSMUSG00000095590 | Gm24305 | 10 | ENSMUSG00000030032 | Wdr54    | 9  |
| ENSMUSG00000093854 | Gm24310 | 20 | ENSMUSG00000042660 | Wdr55    | 20 |
| ENSMUSG00000077391 | Gm24336 | 10 | ENSMUSG00000031959 | Wdr59    | 20 |
| ENSMUSG00000077394 | Gm24339 | 20 | ENSMUSG00000034379 | Wdr5b    | 20 |
| ENSMUSG00000089337 | Gm24346 | 9  | ENSMUSG00000066357 | Wdr6     | 17 |
| ENSMUSG00000077581 | Gm24373 | 20 | ENSMUSG00000042050 | Wdr60    | 20 |
| ENSMUSG00000084644 | Gm24379 | 20 | ENSMUSG00000061559 | Wdr61    | 20 |
| ENSMUSG00000080555 | Gm24396 | 20 | ENSMUSG00000037020 | Wdr62    | 9  |
| ENSMUSG00000088493 | Gm24401 | 20 | ENSMUSG00000043020 | Wdr63    | 14 |
| ENSMUSG00000094377 | Gm24407 | 10 | ENSMUSG00000029442 | Wdr66    | 14 |
| ENSMUSG00000065360 | Gm24412 | 20 | ENSMUSG00000040560 | Wdr7     | 3  |
| ENSMUSG00000065911 | Gm24447 | 10 | ENSMUSG00000039828 | Wdr70    | 20 |
| ENSMUSG00000098113 | Gm2445  | 20 | ENSMUSG00000044976 | Wdr72    | 13 |
| ENSMUSG00000094704 | Gm24487 | 1  | ENSMUSG00000025722 | Wdr73    | 20 |
| ENSMUSG00000065738 | Gm24494 | 10 | ENSMUSG00000042729 | Wdr74    | 12 |

|                    |         |    |                   |         |    |
|--------------------|---------|----|-------------------|---------|----|
| ENSMUSG0000093958  | Gm24495 | 20 | ENSMUSG0000025995 | Wdr75   | 1  |
| ENSMUSG0000093956  | Gm24497 | 10 | ENSMUSG0000027242 | Wdr76   | 20 |
| ENSMUSG0000089070  | Gm24498 | 20 | ENSMUSG0000000561 | Wdr77   | 20 |
| ENSMUSG0000088308  | Gm24507 | 10 | ENSMUSG0000035126 | Wdr78   | 1  |
| ENSMUSG0000092702  | Gm24514 | 10 | ENSMUSG0000045374 | Wdr81   | 12 |
| ENSMUSG0000064851  | Gm24525 | 20 | ENSMUSG0000020257 | Wdr82   | 20 |
| ENSMUSG0000088573  | Gm24530 | 20 | ENSMUSG0000005150 | Wdr83   | 10 |
| ENSMUSG0000093874  | Gm24539 | 9  | ENSMUSG0000059355 | Wdr83os | 20 |
| ENSMUSG0000089271  | Gm24552 | 20 | ENSMUSG0000055235 | Wdr86   | 13 |
| ENSMUSG0000092928  | Gm24563 | 20 | ENSMUSG0000045690 | Wdr89   | 20 |
| ENSMUSG0000077155  | Gm24582 | 20 | ENSMUSG0000073434 | Wdr90   | 1  |
| ENSMUSG0000084453  | Gm24596 | 20 | ENSMUSG0000058486 | Wdr91   | 20 |
| ENSMUSG0000065200  | Gm24613 | 20 | ENSMUSG0000078970 | Wdr92   | 1  |
| ENSMUSG0000065203  | Gm24614 | 10 | ENSMUSG0000039099 | Wdr93   | 20 |
| ENSMUSG0000065208  | Gm24616 | 10 | ENSMUSG0000029658 | Wdr95   | 20 |
| ENSMUSG0000064558  | Gm24620 | 10 | ENSMUSG0000026988 | Wdsub1  | 1  |
| ENSMUSG00000102215 | Gm2464  | 20 | ENSMUSG0000037622 | Wdte1   | 20 |
| ENSMUSG0000087739  | Gm24644 | 20 | ENSMUSG0000031016 | Wee1    | 20 |
| ENSMUSG0000098102  | Gm2467  | 12 | ENSMUSG0000037159 | Wee2    | 20 |
| ENSMUSG0000077347  | Gm24671 | 20 | ENSMUSG0000023336 | Wfdc1   | 1  |
| ENSMUSG0000088856  | Gm24727 | 10 | ENSMUSG0000000983 | Wfdc18  | 20 |
| ENSMUSG0000088850  | Gm24729 | 20 | ENSMUSG0000017723 | Wfdc2   | 13 |
| ENSMUSG0000089133  | Gm24771 | 20 | ENSMUSG0000076434 | Wfdc3   | 20 |
| ENSMUSG0000077472  | Gm24791 | 18 | ENSMUSG0000071192 | Wfikn1  | 20 |
| ENSMUSG0000095701  | Gm24830 | 20 | ENSMUSG0000044177 | Wfikn2  | 13 |
| ENSMUSG0000089405  | Gm24876 | 20 | ENSMUSG0000039474 | Wfs1    | 3  |
| ENSMUSG0000089407  | Gm24878 | 20 | ENSMUSG0000045795 | Whamm   | 9  |
| ENSMUSG0000095133  | Gm24897 | 10 | ENSMUSG0000039137 | Whrn    | 20 |
| ENSMUSG00000113563 | Gm2492  | 20 | ENSMUSG0000020218 | Wif1    | 20 |
| ENSMUSG0000064952  | Gm24920 | 10 | ENSMUSG0000075284 | Wipf1   | 15 |
| ENSMUSG0000094304  | Gm24923 | 20 | ENSMUSG0000038013 | Wipf2   | 18 |
| ENSMUSG0000094306  | Gm24924 | 10 | ENSMUSG0000086040 | Wipf3   | 9  |
| ENSMUSG0000065331  | Gm24927 | 20 | ENSMUSG0000041895 | Wipi1   | 20 |
| ENSMUSG0000098425  | Gm24949 | 3  | ENSMUSG0000029578 | Wipi2   | 20 |
| ENSMUSG0000064377  | Gm24966 | 20 | ENSMUSG0000024050 | Wiz     | 1  |
| ENSMUSG0000095361  | Gm24967 | 10 | ENSMUSG0000028173 | Wls     | 9  |
| ENSMUSG0000096046  | Gm24969 | 20 | ENSMUSG0000045962 | Wnk1    | 20 |
| ENSMUSG0000077645  | Gm24983 | 20 | ENSMUSG0000037989 | Wnk2    | 18 |
| ENSMUSG0000089026  | Gm25014 | 19 | ENSMUSG0000041245 | Wnk3    | 20 |
| ENSMUSG0000064867  | Gm25039 | 20 | ENSMUSG0000035112 | Wnk4    | 1  |
| ENSMUSG0000084616  | Gm25047 | 20 | ENSMUSG0000026167 | Wnt10a  | 20 |
| ENSMUSG0000093734  | Gm25082 | 3  | ENSMUSG0000022996 | Wnt10b  | 20 |
| ENSMUSG0000095676  | Gm25099 | 10 | ENSMUSG0000010797 | Wnt2    | 19 |
| ENSMUSG0000095678  | Gm25101 | 20 | ENSMUSG0000027840 | Wnt2b   | 20 |
| ENSMUSG0000084421  | Gm25107 | 10 | ENSMUSG0000000125 | Wnt3    | 18 |
| ENSMUSG0000087819  | Gm25117 | 10 | ENSMUSG0000036856 | Wnt4    | 6  |
| ENSMUSG0000065273  | Gm25128 | 10 | ENSMUSG0000021994 | Wnt5a   | 20 |
| ENSMUSG0000064585  | Gm25129 | 10 | ENSMUSG0000030170 | Wnt5b   | 12 |
| ENSMUSG0000064586  | Gm25132 | 20 | ENSMUSG0000030093 | Wnt7a   | 20 |
| ENSMUSG0000064581  | Gm25133 | 20 | ENSMUSG0000022382 | Wnt7b   | 12 |
| ENSMUSG0000064964  | Gm25147 | 1  | ENSMUSG0000036961 | Wnt8b   | 1  |
| ENSMUSG0000094068  | Gm25156 | 10 | ENSMUSG0000000126 | Wnt9a   | 9  |
| ENSMUSG0000095009  | Gm25175 | 20 | ENSMUSG0000018486 | Wnt9b   | 18 |
| ENSMUSG0000088371  | Gm25180 | 20 | ENSMUSG0000041346 | Wrap53  | 20 |
| ENSMUSG0000088378  | Gm25184 | 20 | ENSMUSG0000029029 | Wrap73  | 20 |

|                    |         |    |                    |         |    |
|--------------------|---------|----|--------------------|---------|----|
| ENSMUSG0000065847  | Gm25188 | 20 | ENSMUSG0000023147  | Wrb     | 1  |
| ENSMUSG0000065845  | Gm25189 | 20 | ENSMUSG0000031583  | Wrn     | 20 |
| ENSMUSG0000093404  | Gm25190 | 20 | ENSMUSG0000021400  | Wrnip1  | 20 |
| ENSMUSG0000088820  | Gm25224 | 16 | ENSMUSG0000017677  | Wsb1    | 9  |
| ENSMUSG0000096547  | Gm25235 | 19 | ENSMUSG0000029364  | Wsb2    | 3  |
| ENSMUSG0000094977  | Gm25256 | 10 | ENSMUSG0000084020  | Wsb2-ps | 20 |
| ENSMUSG0000092675  | Gm25262 | 1  | ENSMUSG0000020811  | Wscd1   | 16 |
| ENSMUSG0000084744  | Gm25291 | 10 | ENSMUSG0000063430  | Wscd2   | 6  |
| ENSMUSG0000058567  | Gm2531  | 20 | ENSMUSG0000016458  | Wt1     | 1  |
| ENSMUSG0000095738  | Gm25313 | 10 | ENSMUSG0000060475  | Wtap    | 2  |
| ENSMUSG0000089586  | Gm25348 | 20 | ENSMUSG0000036459  | Wtip    | 20 |
| ENSMUSG0000094655  | Gm25360 | 10 | ENSMUSG0000018849  | Wwc1    | 20 |
| ENSMUSG0000089475  | Gm25363 | 20 | ENSMUSG0000031563  | Wwc2    | 20 |
| ENSMUSG0000087963  | Gm25394 | 10 | ENSMUSG0000004637  | Wwox    | 18 |
| ENSMUSG0000087968  | Gm25395 | 12 | ENSMUSG0000041058  | Wwp1    | 12 |
| ENSMUSG0000088224  | Gm25406 | 20 | ENSMUSG0000031930  | Wwp2    | 20 |
| ENSMUSG0000089698  | Gm2541  | 17 | ENSMUSG0000027803  | Wwtr1   | 20 |
| ENSMUSG0000065694  | Gm25411 | 20 | ENSMUSG0000019470  | Xab2    | 20 |
| ENSMUSG0000096222  | Gm25412 | 10 | ENSMUSG0000040483  | Xaf1    | 20 |
| ENSMUSG00000117771 | Gm25432 | 20 | ENSMUSG0000020484  | Xbp1    | 20 |
| ENSMUSG0000088902  | Gm25435 | 20 | ENSMUSG0000024066  | Xdh     | 20 |
| ENSMUSG0000094199  | Gm25450 | 20 | ENSMUSG0000025860  | Xiap    | 3  |
| ENSMUSG0000094440  | Gm25453 | 20 | ENSMUSG0000086503  | Xist    | 19 |
| ENSMUSG0000098019  | Gm2546  | 20 | ENSMUSG0000015342  | Xk      | 18 |
| ENSMUSG0000088008  | Gm25492 | 10 | ENSMUSG0000051951  | Xkr4    | 19 |
| ENSMUSG0000077615  | Gm25499 | 20 | ENSMUSG0000035067  | Xkr6    | 9  |
| ENSMUSG0000080530  | Gm25540 | 20 | ENSMUSG0000042631  | Xkr7    | 20 |
| ENSMUSG0000080538  | Gm25541 | 10 | ENSMUSG0000037752  | Xkr8    | 20 |
| ENSMUSG0000084625  | Gm25544 | 20 | ENSMUSG0000031258  | Xkrx    | 20 |
| ENSMUSG0000096841  | Gm25596 | 20 | ENSMUSG0000054626  | Xlr     | 20 |
| ENSMUSG0000095641  | Gm25615 | 20 | ENSMUSG0000057836  | Xlr3a   | 20 |
| ENSMUSG0000065934  | Gm25630 | 20 | ENSMUSG0000073125  | Xlr3b   | 20 |
| ENSMUSG0000077578  | Gm25631 | 1  | ENSMUSG0000099481  | Xndc1   | 20 |
| ENSMUSG0000094251  | Gm25632 | 20 | ENSMUSG0000028329  | Xpa     | 20 |
| ENSMUSG0000064609  | Gm25635 | 20 | ENSMUSG0000030094  | Xpc     | 9  |
| ENSMUSG0000064600  | Gm25636 | 20 | ENSMUSG0000025027  | Xpnpep1 | 20 |
| ENSMUSG0000096496  | Gm25646 | 10 | ENSMUSG0000022401  | Xpnpep3 | 18 |
| ENSMUSG0000094095  | Gm25648 | 20 | ENSMUSG0000020290  | Xpo1    | 20 |
| ENSMUSG0000089097  | Gm25658 | 20 | ENSMUSG0000021952  | Xpo4    | 20 |
| ENSMUSG00000106879 | Gm2566  | 20 | ENSMUSG0000067150  | Xpo5    | 20 |
| ENSMUSG0000096659  | Gm25679 | 20 | ENSMUSG0000000131  | Xpo6    | 1  |
| ENSMUSG0000065876  | Gm25682 | 20 | ENSMUSG0000022100  | Xpo7    | 7  |
| ENSMUSG0000093189  | Gm25694 | 2  | ENSMUSG0000034667  | Xpot    | 1  |
| ENSMUSG0000089258  | Gm25711 | 20 | ENSMUSG0000026469  | Xpr1    | 20 |
| ENSMUSG0000088128  | Gm25720 | 9  | ENSMUSG00000051768 | Xrcc1   | 20 |
| ENSMUSG00000115017 | Gm2573  | 20 | ENSMUSG0000028933  | Xrcc2   | 1  |
| ENSMUSG0000078162  | Gm2574  | 20 | ENSMUSG0000021287  | Xrcc3   | 20 |
| ENSMUSG0000077176  | Gm25759 | 20 | ENSMUSG0000021615  | Xrcc4   | 20 |
| ENSMUSG0000080365  | Gm25776 | 10 | ENSMUSG0000026187  | Xrcc5   | 1  |
| ENSMUSG0000084477  | Gm25780 | 20 | ENSMUSG0000022471  | Xrcc6   | 20 |
| ENSMUSG0000064655  | Gm25788 | 10 | ENSMUSG0000032410  | Xrn1    | 12 |
| ENSMUSG0000065220  | Gm25794 | 20 | ENSMUSG0000027433  | Xrn2    | 18 |
| ENSMUSG0000077607  | Gm25803 | 20 | ENSMUSG0000035211  | Xrra1   | 1  |
| ENSMUSG0000064682  | Gm25813 | 10 | ENSMUSG0000047434  | Xxylt1  | 20 |
| ENSMUSG0000070166  | Gm25821 | 10 | ENSMUSG0000035769  | Xylb    | 20 |

|                    |         |    |                    |           |    |
|--------------------|---------|----|--------------------|-----------|----|
| ENSMUSG0000089549  | Gm25831 | 20 | ENSMUSG0000030657  | Xylt1     | 20 |
| ENSMUSG0000089542  | Gm25835 | 10 | ENSMUSG0000020868  | Xylt2     | 18 |
| ENSMUSG0000084537  | Gm25845 | 20 | ENSMUSG0000075054  | Yae1d1    | 3  |
| ENSMUSG0000080440  | Gm25848 | 10 | ENSMUSG0000022634  | Yaf2      | 6  |
| ENSMUSG0000064724  | Gm25852 | 10 | ENSMUSG0000053110  | Yap1      | 9  |
| ENSMUSG0000094609  | Gm25870 | 20 | ENSMUSG0000028811  | Yars      | 6  |
| ENSMUSG0000094605  | Gm25873 | 20 | ENSMUSG0000022792  | Yars2     | 20 |
| ENSMUSG0000094604  | Gm25874 | 10 | ENSMUSG0000033126  | Ybey      | 20 |
| ENSMUSG0000095260  | Gm25890 | 20 | ENSMUSG0000028639  | Ybx1      | 9  |
| ENSMUSG0000088246  | Gm25911 | 20 | ENSMUSG00000107035 | Ybx1-ps2  | 18 |
| ENSMUSG0000064833  | Gm25926 | 20 | ENSMUSG0000018554  | Ybx2      | 20 |
| ENSMUSG0000064719  | Gm25930 | 20 | ENSMUSG0000030189  | Ybx3      | 20 |
| ENSMUSG0000094476  | Gm25934 | 10 | ENSMUSG0000041774  | Ydjc      | 20 |
| ENSMUSG0000093843  | Gm25939 | 10 | ENSMUSG0000041215  | Yeats2    | 1  |
| ENSMUSG0000084433  | Gm25945 | 20 | ENSMUSG0000020171  | Yeats4    | 20 |
| ENSMUSG0000087790  | Gm25970 | 10 | ENSMUSG0000014932  | Yes1      | 20 |
| ENSMUSG0000096684  | Gm25989 | 10 | ENSMUSG0000024875  | Yif1a     | 20 |
| ENSMUSG0000075864  | Gm26002 | 10 | ENSMUSG0000030588  | Yif1b     | 3  |
| ENSMUSG0000089282  | Gm26024 | 20 | ENSMUSG0000057375  | Yipf1     | 3  |
| ENSMUSG0000064999  | Gm26035 | 20 | ENSMUSG0000032182  | Yipf2     | 20 |
| ENSMUSG0000088775  | Gm26037 | 20 | ENSMUSG0000071074  | Yipf3     | 20 |
| ENSMUSG0000087938  | Gm26049 | 20 | ENSMUSG0000024072  | Yipf4     | 20 |
| ENSMUSG0000077830  | Gm26050 | 20 | ENSMUSG0000024487  | Yipf5     | 20 |
| ENSMUSG0000078300  | Gm2606  | 12 | ENSMUSG0000047694  | Yipf6     | 20 |
| ENSMUSG0000065315  | Gm26064 | 20 | ENSMUSG0000048967  | Yjefn3    | 20 |
| ENSMUSG0000065195  | Gm26071 | 10 | ENSMUSG0000003208  | Yju2      | 20 |
| ENSMUSG0000094165  | Gm26073 | 20 | ENSMUSG0000002741  | Ykt6      | 20 |
| ENSMUSG0000088527  | Gm26086 | 20 | ENSMUSG0000021244  | Ylpm1     | 9  |
| ENSMUSG0000065906  | Gm26107 | 10 | ENSMUSG0000026775  | Yme1l1    | 2  |
| ENSMUSG0000065904  | Gm26109 | 20 | ENSMUSG0000046404  | Yod1      | 20 |
| ENSMUSG0000065298  | Gm26121 | 20 | ENSMUSG0000022773  | Ypel1     | 18 |
| ENSMUSG0000065127  | Gm26127 | 20 | ENSMUSG0000018427  | Ypel2     | 9  |
| ENSMUSG0000065104  | Gm26128 | 10 | ENSMUSG0000042675  | Ypel3     | 7  |
| ENSMUSG00000113113 | Gm2614  | 20 | ENSMUSG0000034059  | Ypel4     | 5  |
| ENSMUSG0000093040  | Gm26141 | 20 | ENSMUSG0000039770  | Ypel5     | 11 |
| ENSMUSG0000065725  | Gm26165 | 10 | ENSMUSG0000028889  | Yrdc      | 20 |
| ENSMUSG0000065728  | Gm26175 | 10 | ENSMUSG0000035851  | Ythdc1    | 9  |
| ENSMUSG0000065729  | Gm26176 | 10 | ENSMUSG0000034653  | Ythdc2    | 20 |
| ENSMUSG0000095068  | Gm26189 | 2  | ENSMUSG0000038848  | Ythdf1    | 20 |
| ENSMUSG0000092774  | Gm26197 | 20 | ENSMUSG0000040025  | Ythdf2    | 20 |
| ENSMUSG0000064844  | Gm26202 | 10 | ENSMUSG0000047213  | Ythdf3    | 20 |
| ENSMUSG0000089209  | Gm26215 | 20 | ENSMUSG0000018326  | Ywhab     | 9  |
| ENSMUSG0000064442  | Gm26225 | 10 | ENSMUSG0000020849  | Ywhae     | 13 |
| ENSMUSG0000096838  | Gm26232 | 20 | ENSMUSG0000051391  | Ywhag     | 19 |
| ENSMUSG0000095616  | Gm26244 | 10 | ENSMUSG0000018965  | Ywhah     | 19 |
| ENSMUSG00000117613 | Gm2629  | 20 | ENSMUSG0000076432  | Ywhaq     | 1  |
| ENSMUSG0000078006  | Gm26301 | 20 | ENSMUSG0000080902  | Ywhaq-ps3 | 4  |
| ENSMUSG0000065824  | Gm26315 | 20 | ENSMUSG0000022285  | Ywhaz     | 9  |
| ENSMUSG0000065007  | Gm26324 | 10 | ENSMUSG0000021264  | Yy1       | 20 |
| ENSMUSG0000064755  | Gm26328 | 18 | ENSMUSG0000049090  | Zadh2     | 20 |
| ENSMUSG0000096328  | Gm26337 | 10 | ENSMUSG0000079173  | Zan       | 6  |
| ENSMUSG0000088845  | Gm26355 | 20 | ENSMUSG0000026117  | Zap70     | 20 |
| ENSMUSG0000088456  | Gm26372 | 20 | ENSMUSG0000056586  | Zar1l     | 20 |
| ENSMUSG0000077426  | Gm26387 | 20 | ENSMUSG0000034151  | Zbbx      | 20 |
| ENSMUSG0000065637  | Gm26397 | 10 | ENSMUSG0000041995  | Zbed3     | 17 |

|                   |         |    |                    |           |    |
|-------------------|---------|----|--------------------|-----------|----|
| ENSMUSG0000089125 | Gm26403 | 20 | ENSMUSG0000034333  | Zbed4     | 19 |
| ENSMUSG0000089129 | Gm26407 | 20 | ENSMUSG0000034173  | Zbed5     | 20 |
| ENSMUSG0000088299 | Gm26414 | 20 | ENSMUSG0000027514  | Zbp1      | 20 |
| ENSMUSG0000064525 | Gm26440 | 10 | ENSMUSG0000033454  | Zbtb1     | 20 |
| ENSMUSG0000093815 | Gm26444 | 10 | ENSMUSG0000069114  | Zbtb10    | 1  |
| ENSMUSG0000064389 | Gm26446 | 20 | ENSMUSG0000022601  | Zbtb11    | 20 |
| ENSMUSG0000064380 | Gm26448 | 12 | ENSMUSG00000102101 | Zbtb11os1 | 20 |
| ENSMUSG0000092805 | Gm26461 | 10 | ENSMUSG0000049823  | Zbtb12    | 20 |
| ENSMUSG0000095713 | Gm26466 | 20 | ENSMUSG0000049672  | Zbtb14    | 20 |
| ENSMUSG0000065089 | Gm26493 | 10 | ENSMUSG0000066687  | Zbtb16    | 20 |
| ENSMUSG0000093994 | Gm26498 | 20 | ENSMUSG0000006215  | Zbtb17    | 9  |
| ENSMUSG0000096019 | Gm26504 | 10 | ENSMUSG0000063659  | Zbtb18    | 9  |
| ENSMUSG0000097612 | Gm26509 | 20 | ENSMUSG0000075327  | Zbtb2     | 20 |
| ENSMUSG0000097157 | Gm26512 | 20 | ENSMUSG0000022708  | Zbtb20    | 2  |
| ENSMUSG0000097150 | Gm26513 | 20 | ENSMUSG0000046962  | Zbtb21    | 20 |
| ENSMUSG0000097429 | Gm26520 | 20 | ENSMUSG0000051390  | Zbtb22    | 20 |
| ENSMUSG0000097296 | Gm26532 | 20 | ENSMUSG0000019826  | Zbtb24    | 20 |
| ENSMUSG0000097748 | Gm26533 | 20 | ENSMUSG0000056459  | Zbtb25    | 9  |
| ENSMUSG0000097887 | Gm26542 | 1  | ENSMUSG0000050714  | Zbtb26    | 16 |
| ENSMUSG0000097884 | Gm26543 | 20 | ENSMUSG0000071661  | Zbtb3     | 20 |
| ENSMUSG0000097217 | Gm26549 | 12 | ENSMUSG0000048047  | Zbtb33    | 2  |
| ENSMUSG0000097399 | Gm26555 | 20 | ENSMUSG0000068966  | Zbtb34    | 20 |
| ENSMUSG0000097396 | Gm26556 | 9  | ENSMUSG0000043467  | Zbtb37    | 20 |
| ENSMUSG0000097027 | Gm26559 | 20 | ENSMUSG0000040433  | Zbtb38    | 3  |
| ENSMUSG0000097078 | Gm26566 | 9  | ENSMUSG0000044617  | Zbtb39    | 20 |
| ENSMUSG0000096953 | Gm26571 | 20 | ENSMUSG0000018750  | Zbtb4     | 18 |
| ENSMUSG0000097926 | Gm26575 | 20 | ENSMUSG0000060862  | Zbtb40    | 20 |
| ENSMUSG0000097923 | Gm26577 | 19 | ENSMUSG0000033964  | Zbtb41    | 3  |
| ENSMUSG0000097476 | Gm26583 | 20 | ENSMUSG0000037638  | Zbtb42    | 20 |
| ENSMUSG0000097730 | Gm26588 | 20 | ENSMUSG0000026788  | Zbtb43    | 20 |
| ENSMUSG0000097535 | Gm26592 | 20 | ENSMUSG0000047412  | Zbtb44    | 3  |
| ENSMUSG0000010529 | Gm266   | 20 | ENSMUSG0000049600  | Zbtb45    | 20 |
| ENSMUSG0000097854 | Gm26602 | 20 | ENSMUSG0000027583  | Zbtb46    | 20 |
| ENSMUSG0000097079 | Gm26604 | 7  | ENSMUSG0000028952  | Zbtb48    | 20 |
| ENSMUSG0000097240 | Gm26614 | 20 | ENSMUSG0000029127  | Zbtb49    | 20 |
| ENSMUSG0000097342 | Gm26618 | 20 | ENSMUSG0000049657  | Zbtb5     | 20 |
| ENSMUSG0000096968 | Gm26620 | 9  | ENSMUSG0000066798  | Zbtb6     | 4  |
| ENSMUSG0000096967 | Gm26621 | 20 | ENSMUSG0000035011  | Zbtb7a    | 20 |
| ENSMUSG0000097445 | Gm26631 | 20 | ENSMUSG0000028042  | Zbtb7b    | 18 |
| ENSMUSG0000097441 | Gm26633 | 20 | ENSMUSG0000044646  | Zbtb7c    | 18 |
| ENSMUSG0000097763 | Gm26636 | 20 | ENSMUSG0000028807  | Zbtb8a    | 9  |
| ENSMUSG0000097563 | Gm26638 | 2  | ENSMUSG0000048485  | Zbtb8b    | 6  |
| ENSMUSG0000097684 | Gm26645 | 1  | ENSMUSG0000057572  | Zbtb8os   | 2  |
| ENSMUSG0000097275 | Gm26648 | 13 | ENSMUSG0000079605  | Zbtb9     | 20 |
| ENSMUSG0000097497 | Gm26652 | 9  | ENSMUSG0000043542  | Zc2hc1a   | 19 |
| ENSMUSG0000097496 | Gm26653 | 10 | ENSMUSG0000045064  | Zc2hc1c   | 20 |
| ENSMUSG0000096934 | Gm26658 | 20 | ENSMUSG0000039810  | Zc3h10    | 20 |
| ENSMUSG0000097601 | Gm26660 | 20 | ENSMUSG00000102976 | Zc3h11a   | 20 |
| ENSMUSG0000097419 | Gm26666 | 20 | ENSMUSG0000042677  | Zc3h12a   | 20 |
| ENSMUSG0000097339 | Gm26671 | 20 | ENSMUSG0000035045  | Zc3h12b   | 4  |
| ENSMUSG0000097330 | Gm26672 | 13 | ENSMUSG0000035164  | Zc3h12c   | 20 |
| ENSMUSG0000097596 | Gm26673 | 1  | ENSMUSG0000022000  | Zc3h13    | 20 |
| ENSMUSG0000097888 | Gm26682 | 20 | ENSMUSG0000021012  | Zc3h14    | 20 |
| ENSMUSG0000097286 | Gm26684 | 13 | ENSMUSG0000027091  | Zc3h15    | 20 |
| ENSMUSG0000097911 | Gm26691 | 20 | ENSMUSG0000017478  | Zc3h18    | 9  |

|                    |         |    |                   |           |    |
|--------------------|---------|----|-------------------|-----------|----|
| ENSMUSG0000097035  | Gm26692 | 1  | ENSMUSG0000075600 | Zc3h3     | 20 |
| ENSMUSG0000097030  | Gm26693 | 20 | ENSMUSG0000059273 | Zc3h4     | 20 |
| ENSMUSG0000097513  | Gm26696 | 20 | ENSMUSG0000042851 | Zc3h6     | 20 |
| ENSMUSG0000097877  | Gm26703 | 6  | ENSMUSG0000037965 | Zc3h7a    | 20 |
| ENSMUSG00000101162 | Gm26728 | 20 | ENSMUSG0000022390 | Zc3h7b    | 20 |
| ENSMUSG0000097464  | Gm26736 | 12 | ENSMUSG0000027387 | Zc3h8     | 20 |
| ENSMUSG0000097467  | Gm26737 | 20 | ENSMUSG0000029826 | Zc3hav1   | 12 |
| ENSMUSG0000097705  | Gm26740 | 20 | ENSMUSG0000047749 | Zc3hav1l  | 20 |
| ENSMUSG0000097783  | Gm26747 | 9  | ENSMUSG0000039130 | Zc3hc1    | 20 |
| ENSMUSG0000097840  | Gm26756 | 4  | ENSMUSG0000035062 | Zc4h2     | 20 |
| ENSMUSG00000109055 | Gm2676  | 20 | ENSMUSG0000018239 | Zcchc10   | 20 |
| ENSMUSG0000097068  | Gm26760 | 9  | ENSMUSG0000036699 | Zcchc12   | 17 |
| ENSMUSG0000097259  | Gm26766 | 20 | ENSMUSG0000061410 | Zcchc14   | 9  |
| ENSMUSG0000097250  | Gm26771 | 20 | ENSMUSG0000028772 | Zcchc17   | 20 |
| ENSMUSG0000097801  | Gm26777 | 9  | ENSMUSG0000031428 | Zcchc18   | 20 |
| ENSMUSG0000097140  | Gm26779 | 20 | ENSMUSG0000038866 | Zcchc2    | 20 |
| ENSMUSG0000097433  | Gm26781 | 20 | ENSMUSG0000055538 | Zcchc24   | 20 |
| ENSMUSG0000097431  | Gm26782 | 18 | ENSMUSG0000074682 | Zcchc3    | 20 |
| ENSMUSG0000096992  | Gm26788 | 20 | ENSMUSG0000029179 | Zcchc4    | 20 |
| ENSMUSG0000096999  | Gm26793 | 20 | ENSMUSG0000035649 | Zcchc7    | 20 |
| ENSMUSG0000097572  | Gm26797 | 20 | ENSMUSG0000029427 | Zcchc8    | 20 |
| ENSMUSG0000097892  | Gm26801 | 20 | ENSMUSG0000021621 | Zcchc9    | 20 |
| ENSMUSG0000097265  | Gm26803 | 20 | ENSMUSG0000083274 | Zcchc9-ps | 20 |
| ENSMUSG0000097268  | Gm26805 | 20 | ENSMUSG0000022635 | Zcrb1     | 20 |
| ENSMUSG0000097385  | Gm26814 | 9  | ENSMUSG0000037108 | Zcwpw1    | 20 |
| ENSMUSG0000097635  | Gm26826 | 20 | ENSMUSG0000032443 | Zcwpw2    | 20 |
| ENSMUSG00000110559 | Gm26843 | 12 | ENSMUSG0000027520 | Zdbf2     | 1  |
| ENSMUSG0000097311  | Gm26871 | 4  | ENSMUSG0000039199 | Zdhhc1    | 13 |
| ENSMUSG0000097372  | Gm26876 | 20 | ENSMUSG0000015335 | Zdhhc12   | 20 |
| ENSMUSG0000096974  | Gm26881 | 19 | ENSMUSG0000030471 | Zdhhc13   | 9  |
| ENSMUSG0000097125  | Gm26885 | 12 | ENSMUSG0000034265 | Zdhhc14   | 20 |
| ENSMUSG0000097797  | Gm26901 | 7  | ENSMUSG0000033906 | Zdhhc15   | 20 |
| ENSMUSG0000097558  | Gm26902 | 20 | ENSMUSG0000025157 | Zdhhc16   | 20 |
| ENSMUSG0000097835  | Gm26910 | 20 | ENSMUSG0000035798 | Zdhhc17   | 7  |
| ENSMUSG0000097834  | Gm26911 | 20 | ENSMUSG0000037553 | Zdhhc18   | 20 |
| ENSMUSG0000097971  | Gm26917 | 2  | ENSMUSG0000039470 | Zdhhc2    | 20 |
| ENSMUSG00000100819 | Gm2693  | 20 | ENSMUSG0000021969 | Zdhhc20   | 20 |
| ENSMUSG00000102142 | Gm26930 | 20 | ENSMUSG0000028403 | Zdhhc21   | 20 |
| ENSMUSG0000098146  | Gm26935 | 20 | ENSMUSG0000048483 | Zdhhc22   | 18 |
| ENSMUSG0000097248  | Gm2694  | 3  | ENSMUSG0000036304 | Zdhhc23   | 1  |
| ENSMUSG0000098066  | Gm26944 | 20 | ENSMUSG0000006463 | Zdhhc24   | 20 |
| ENSMUSG0000098055  | Gm26947 | 20 | ENSMUSG0000025786 | Zdhhc3    | 12 |
| ENSMUSG0000097983  | Gm26971 | 20 | ENSMUSG0000001844 | Zdhhc4    | 20 |
| ENSMUSG0000097994  | Gm26982 | 20 | ENSMUSG0000034075 | Zdhhc5    | 3  |
| ENSMUSG0000097961  | Gm27000 | 20 | ENSMUSG0000024982 | Zdhhc6    | 20 |
| ENSMUSG0000098024  | Gm27003 | 20 | ENSMUSG0000031823 | Zdhhc7    | 10 |
| ENSMUSG0000098108  | Gm27008 | 20 | ENSMUSG0000036985 | Zdhhc9    | 20 |
| ENSMUSG0000098183  | Gm27010 | 1  | ENSMUSG0000024238 | Zeb1      | 9  |
| ENSMUSG0000097998  | Gm27019 | 20 | ENSMUSG0000026872 | Zeb2      | 5  |
| ENSMUSG0000097970  | Gm27028 | 20 | ENSMUSG0000052248 | Zeb2os    | 18 |
| ENSMUSG0000097239  | Gm27029 | 20 | ENSMUSG0000039686 | Zer1      | 20 |
| ENSMUSG0000098221  | Gm27030 | 20 | ENSMUSG0000049576 | Zfa-ps    | 20 |
| ENSMUSG0000098051  | Gm27032 | 12 | ENSMUSG0000039795 | Zfand1    | 20 |
| ENSMUSG0000098121  | Gm27038 | 20 | ENSMUSG0000053581 | Zfand2a   | 1  |
| ENSMUSG0000098129  | Gm27040 | 20 | ENSMUSG0000026197 | Zfand2b   | 20 |



|                    |         |    |                    |           |    |
|--------------------|---------|----|--------------------|-----------|----|
| ENSMUSG0000099190  | Gm27188 | 20 | ENSMUSG0000044477  | Zfand3    | 9  |
| ENSMUSG00000103042 | Gm2719  | 20 | ENSMUSG0000042213  | Zfand4    | 20 |
| ENSMUSG0000098889  | Gm27206 | 20 | ENSMUSG0000024750  | Zfand5    | 20 |
| ENSMUSG0000098985  | Gm27219 | 20 | ENSMUSG0000030629  | Zfand6    | 20 |
| ENSMUSG0000099150  | Gm27243 | 19 | ENSMUSG0000074578  | Zfas1     | 20 |
| ENSMUSG0000098708  | Gm27252 | 20 | ENSMUSG0000022335  | Zfat      | 18 |
| ENSMUSG0000098340  | Gm27253 | 20 | ENSMUSG0000034163  | Zfc3h1    | 20 |
| ENSMUSG0000099252  | Gm27265 | 20 | ENSMUSG0000040721  | Zfhx2     | 20 |
| ENSMUSG0000098828  | Gm27283 | 20 | ENSMUSG0000093452  | Zfhx2os   | 20 |
| ENSMUSG0000099127  | Gm27320 | 1  | ENSMUSG0000038872  | Zfhx3     | 18 |
| ENSMUSG0000098589  | Gm27353 | 20 | ENSMUSG0000025255  | Zfhx4     | 18 |
| ENSMUSG0000099224  | Gm27379 | 20 | ENSMUSG00000055835 | Zfp1      | 20 |
| ENSMUSG0000098827  | Gm27399 | 1  | ENSMUSG00000055240 | Zfp101    | 20 |
| ENSMUSG0000098791  | Gm27402 | 20 | ENSMUSG00000057895 | Zfp105    | 20 |
| ENSMUSG0000076355  | Gm27509 | 10 | ENSMUSG0000027288  | Zfp106    | 20 |
| ENSMUSG0000098259  | Gm27616 | 12 | ENSMUSG0000030486  | Zfp108    | 20 |
| ENSMUSG00000107008 | Gm2762  | 20 | ENSMUSG0000074283  | Zfp109    | 20 |
| ENSMUSG0000098750  | Gm27653 | 20 | ENSMUSG00000051034 | Zfp11     | 13 |
| ENSMUSG00000110318 | Gm2767  | 20 | ENSMUSG00000058638 | Zfp110    | 20 |
| ENSMUSG0000098349  | Gm27711 | 2  | ENSMUSG00000087598 | Zfp111    | 20 |
| ENSMUSG0000099155  | Gm27805 | 20 | ENSMUSG00000052675 | Zfp112    | 20 |
| ENSMUSG0000098674  | Gm27813 | 20 | ENSMUSG0000037007  | Zfp113    | 20 |
| ENSMUSG0000098271  | Gm27828 | 20 | ENSMUSG00000068962 | Zfp114    | 20 |
| ENSMUSG0000098733  | Gm27833 | 12 | ENSMUSG00000057835 | Zfp119a   | 13 |
| ENSMUSG0000098628  | Gm27976 | 20 | ENSMUSG00000062101 | Zfp119b   | 20 |
| ENSMUSG0000099041  | Gm28035 | 20 | ENSMUSG0000029587  | Zfp12     | 18 |
| ENSMUSG0000098374  | Gm28043 | 20 | ENSMUSG00000068134 | Zfp120    | 20 |
| ENSMUSG00000116536 | Gm2805  | 20 | ENSMUSG00000069755 | Zfp125    | 20 |
| ENSMUSG0000099061  | Gm28050 | 20 | ENSMUSG00000060397 | Zfp128    | 12 |
| ENSMUSG00000100929 | Gm28064 | 20 | ENSMUSG00000062012 | Zfp13     | 20 |
| ENSMUSG00000116560 | Gm2808  | 20 | ENSMUSG00000094870 | Zfp131    | 20 |
| ENSMUSG0000082938  | Gm2810  | 20 | ENSMUSG00000083674 | Zfp133-ps | 20 |
| ENSMUSG0000099954  | Gm28112 | 20 | ENSMUSG00000053985 | Zfp14     | 20 |
| ENSMUSG00000100158 | Gm28119 | 20 | ENSMUSG00000092416 | Zfp141    | 20 |
| ENSMUSG00000100213 | Gm28151 | 20 | ENSMUSG00000026135 | Zfp142    | 20 |
| ENSMUSG00000100053 | Gm28154 | 20 | ENSMUSG00000061079 | Zfp143    | 20 |
| ENSMUSG00000101299 | Gm28175 | 20 | ENSMUSG00000037029 | Zfp146    | 20 |
| ENSMUSG00000101596 | Gm28182 | 1  | ENSMUSG00000022811 | Zfp148    | 20 |
| ENSMUSG0000099375  | Gm28187 | 20 | ENSMUSG00000036898 | Zfp157    | 2  |
| ENSMUSG00000100255 | Gm28196 | 20 | ENSMUSG00000067942 | Zfp160    | 1  |
| ENSMUSG00000101335 | Gm28229 | 20 | ENSMUSG00000050954 | Zfp169    | 20 |
| ENSMUSG0000097452  | Gm2824  | 19 | ENSMUSG00000054939 | Zfp174    | 20 |
| ENSMUSG00000100620 | Gm28277 | 3  | ENSMUSG00000057101 | Zfp180    | 19 |
| ENSMUSG00000101014 | Gm28289 | 20 | ENSMUSG00000054737 | Zfp182    | 20 |
| ENSMUSG00000101006 | Gm28299 | 20 | ENSMUSG00000006720 | Zfp184    | 20 |
| ENSMUSG0000086567  | Gm2830  | 20 | ENSMUSG00000031351 | Zfp185    | 13 |
| ENSMUSG0000099924  | Gm28320 | 20 | ENSMUSG00000039634 | Zfp189    | 20 |
| ENSMUSG00000100671 | Gm28322 | 9  | ENSMUSG00000049321 | Zfp2      | 20 |
| ENSMUSG00000100313 | Gm28323 | 20 | ENSMUSG00000025602 | Zfp202    | 20 |
| ENSMUSG0000096751  | Gm28373 | 20 | ENSMUSG00000017421 | Zfp207    | 18 |
| ENSMUSG00000100672 | Gm28404 | 16 | ENSMUSG00000052763 | Zfp212    | 20 |
| ENSMUSG00000101037 | Gm28424 | 19 | ENSMUSG00000071256 | Zfp213    | 20 |
| ENSMUSG00000101111 | Gm28437 | 20 | ENSMUSG00000052056 | Zfp217    | 20 |
| ENSMUSG00000101939 | Gm28438 | 12 | ENSMUSG00000049295 | Zfp219    | 18 |
| ENSMUSG00000100131 | Gm28439 | 20 | ENSMUSG00000061544 | Zfp229    | 9  |

|                    |         |    |                    |          |    |
|--------------------|---------|----|--------------------|----------|----|
| ENSMUSG00000100395 | Gm28448 | 20 | ENSMUSG00000047603 | Zfp235   | 20 |
| ENSMUSG00000100490 | Gm28455 | 20 | ENSMUSG00000041258 | Zfp236   | 7  |
| ENSMUSG00000101166 | Gm28496 | 20 | ENSMUSG00000042097 | Zfp239   | 20 |
| ENSMUSG00000101662 | Gm28499 | 20 | ENSMUSG00000051469 | Zfp24    | 20 |
| ENSMUSG00000100183 | Gm28512 | 20 | ENSMUSG00000030145 | Zfp248   | 1  |
| ENSMUSG00000099568 | Gm28513 | 9  | ENSMUSG00000022526 | Zfp251   | 1  |
| ENSMUSG00000100707 | Gm28523 | 20 | ENSMUSG00000063108 | Zfp26    | 2  |
| ENSMUSG00000099635 | Gm28528 | 18 | ENSMUSG00000049421 | Zfp260   | 19 |
| ENSMUSG00000101320 | Gm28529 | 20 | ENSMUSG00000022529 | Zfp263   | 8  |
| ENSMUSG00000101452 | Gm28530 | 20 | ENSMUSG00000109176 | Zfp264   | 20 |
| ENSMUSG00000100235 | Gm28557 | 20 | ENSMUSG00000060510 | Zfp266   | 20 |
| ENSMUSG00000100417 | Gm28578 | 18 | ENSMUSG00000033883 | Zfp267   | 5  |
| ENSMUSG00000100176 | Gm28586 | 20 | ENSMUSG00000062040 | Zfp27    | 1  |
| ENSMUSG00000100113 | Gm28592 | 20 | ENSMUSG00000030446 | Zfp273   | 1  |
| ENSMUSG00000102070 | Gm28661 | 12 | ENSMUSG00000031365 | Zfp275   | 18 |
| ENSMUSG00000101964 | Gm28693 | 20 | ENSMUSG00000001065 | Zfp276   | 20 |
| ENSMUSG00000099512 | Gm28703 | 18 | ENSMUSG00000055917 | Zfp277   | 19 |
| ENSMUSG00000102001 | Gm28755 | 20 | ENSMUSG00000062861 | Zfp28    | 20 |
| ENSMUSG00000109887 | Gm28756 | 20 | ENSMUSG00000049764 | Zfp280b  | 20 |
| ENSMUSG00000100394 | Gm28791 | 20 | ENSMUSG00000036916 | Zfp280c  | 20 |
| ENSMUSG00000099868 | Gm28792 | 20 | ENSMUSG00000038535 | Zfp280d  | 7  |
| ENSMUSG00000099760 | Gm28800 | 20 | ENSMUSG00000041483 | Zfp281   | 20 |
| ENSMUSG00000099343 | Gm28836 | 20 | ENSMUSG00000025821 | Zfp282   | 2  |
| ENSMUSG00000100975 | Gm28875 | 20 | ENSMUSG00000047342 | Zfp286   | 20 |
| ENSMUSG00000101168 | Gm28892 | 15 | ENSMUSG00000005267 | Zfp287   | 12 |
| ENSMUSG00000101621 | Gm28905 | 1  | ENSMUSG00000039967 | Zfp292   | 20 |
| ENSMUSG00000101450 | Gm28941 | 20 | ENSMUSG00000011267 | Zfp296   | 20 |
| ENSMUSG00000100039 | Gm28959 | 20 | ENSMUSG00000043602 | Zfp3     | 20 |
| ENSMUSG00000079410 | Gm2897  | 20 | ENSMUSG00000047473 | Zfp30    | 20 |
| ENSMUSG00000100552 | Gm29019 | 20 | ENSMUSG00000031079 | Zfp300   | 20 |
| ENSMUSG00000101587 | Gm29036 | 14 | ENSMUSG00000046658 | Zfp316   | 20 |
| ENSMUSG00000101144 | Gm29054 | 20 | ENSMUSG00000057551 | Zfp317   | 20 |
| ENSMUSG00000100768 | Gm29055 | 20 | ENSMUSG00000015597 | Zfp318   | 1  |
| ENSMUSG00000100811 | Gm29083 | 19 | ENSMUSG00000046556 | Zfp319   | 20 |
| ENSMUSG00000100201 | Gm29093 | 20 | ENSMUSG00000046351 | Zfp322a  | 20 |
| ENSMUSG00000100815 | Gm29112 | 20 | ENSMUSG00000004500 | Zfp324   | 20 |
| ENSMUSG00000100764 | Gm29155 | 20 | ENSMUSG00000029290 | Zfp326   | 20 |
| ENSMUSG00000100480 | Gm29156 | 9  | ENSMUSG00000057894 | Zfp329   | 20 |
| ENSMUSG00000100455 | Gm29170 | 20 | ENSMUSG00000031711 | Zfp330   | 6  |
| ENSMUSG00000101344 | Gm29183 | 20 | ENSMUSG00000017667 | Zfp334   | 20 |
| ENSMUSG00000101301 | Gm29214 | 20 | ENSMUSG00000039834 | Zfp335   | 20 |
| ENSMUSG00000101249 | Gm29216 | 20 | ENSMUSG00000085436 | Zfp335os | 20 |
| ENSMUSG00000073174 | Gm29254 | 20 | ENSMUSG00000059842 | Zfp341   | 20 |
| ENSMUSG00000100228 | Gm29257 | 20 | ENSMUSG00000021481 | Zfp346   | 20 |
| ENSMUSG00000099543 | Gm29322 | 20 | ENSMUSG00000063281 | Zfp35    | 20 |
| ENSMUSG00000099625 | Gm29325 | 10 | ENSMUSG00000020364 | Zfp354a  | 20 |
| ENSMUSG00000099470 | Gm29340 | 20 | ENSMUSG00000020335 | Zfp354b  | 20 |
| ENSMUSG00000099931 | Gm29358 | 9  | ENSMUSG00000044807 | Zfp354c  | 20 |
| ENSMUSG00000100396 | Gm29367 | 3  | ENSMUSG00000047264 | Zfp358   | 20 |
| ENSMUSG00000099839 | Gm29374 | 20 | ENSMUSG00000044786 | Zfp36    | 20 |
| ENSMUSG00000101648 | Gm29388 | 20 | ENSMUSG00000028799 | Zfp362   | 20 |
| ENSMUSG00000101309 | Gm29397 | 9  | ENSMUSG00000037855 | Zfp365   | 9  |
| ENSMUSG00000101823 | Gm29438 | 20 | ENSMUSG00000050919 | Zfp366   | 20 |
| ENSMUSG00000101724 | Gm29453 | 20 | ENSMUSG00000044934 | Zfp367   | 19 |
| ENSMUSG00000101179 | Gm29455 | 1  | ENSMUSG00000021514 | Zfp369   | 20 |

|                    |         |    |                    |           |    |
|--------------------|---------|----|--------------------|-----------|----|
| ENSMUSG00000101995 | Gm29480 | 20 | ENSMUSG00000021127 | Zfp3611   | 20 |
| ENSMUSG00000099959 | Gm29487 | 18 | ENSMUSG00000045817 | Zfp3612   | 20 |
| ENSMUSG00000101778 | Gm29488 | 20 | ENSMUSG00000028389 | Zfp37     | 20 |
| ENSMUSG00000100789 | Gm29508 | 20 | ENSMUSG00000074220 | Zfp382    | 20 |
| ENSMUSG00000099964 | Gm29514 | 9  | ENSMUSG00000099689 | Zfp383    | 20 |
| ENSMUSG00000100475 | Gm29543 | 20 | ENSMUSG00000038346 | Zfp384    | 20 |
| ENSMUSG00000101678 | Gm29609 | 20 | ENSMUSG00000000552 | Zfp385a   | 18 |
| ENSMUSG00000089838 | Gm2962  | 12 | ENSMUSG00000027016 | Zfp385b   | 9  |
| ENSMUSG00000100002 | Gm29642 | 20 | ENSMUSG00000014198 | Zfp385c   | 20 |
| ENSMUSG00000099876 | Gm29650 | 20 | ENSMUSG00000042063 | Zfp386    | 20 |
| ENSMUSG00000100967 | Gm29666 | 20 | ENSMUSG00000082396 | Zfp389    | 20 |
| ENSMUSG00000100794 | Gm29667 | 3  | ENSMUSG00000037001 | Zfp39     | 20 |
| ENSMUSG00000099835 | Gm29668 | 9  | ENSMUSG00000034522 | Zfp395    | 18 |
| ENSMUSG00000100302 | Gm29670 | 20 | ENSMUSG00000024276 | Zfp397    | 20 |
| ENSMUSG00000112466 | Gm29674 | 12 | ENSMUSG00000062519 | Zfp398    | 3  |
| ENSMUSG00000113515 | Gm29675 | 18 | ENSMUSG00000002617 | Zfp40     | 4  |
| ENSMUSG00000113689 | Gm29676 | 20 | ENSMUSG00000048410 | Zfp407    | 7  |
| ENSMUSG00000109097 | Gm29683 | 18 | ENSMUSG00000075040 | Zfp408    | 20 |
| ENSMUSG00000118219 | Gm29695 | 20 | ENSMUSG00000047003 | Zfp41     | 20 |
| ENSMUSG00000111673 | Gm29724 | 20 | ENSMUSG00000042472 | Zfp410    | 9  |
| ENSMUSG00000103334 | Gm29771 | 9  | ENSMUSG00000073423 | Zfp414    | 20 |
| ENSMUSG00000103419 | Gm29808 | 20 | ENSMUSG00000034538 | Zfp418    | 1  |
| ENSMUSG00000111027 | Gm2981  | 20 | ENSMUSG00000058402 | Zfp420    | 5  |
| ENSMUSG00000114256 | Gm29844 | 20 | ENSMUSG00000059878 | Zfp422    | 5  |
| ENSMUSG00000105331 | Gm29865 | 19 | ENSMUSG00000091515 | Zfp422-ps | 20 |
| ENSMUSG00000097794 | Gm2990  | 1  | ENSMUSG00000045333 | Zfp423    | 18 |
| ENSMUSG00000092454 | Gm2991  | 20 | ENSMUSG00000059475 | Zfp426    | 1  |
| ENSMUSG00000115868 | Gm2999  | 20 | ENSMUSG00000064264 | Zfp428    | 10 |
| ENSMUSG00000000594 | Gm2a    | 20 | ENSMUSG00000078994 | Zfp429    | 20 |
| ENSMUSG00000107318 | Gm30003 | 9  | ENSMUSG00000096795 | Zfp433    | 20 |
| ENSMUSG00000112278 | Gm30025 | 1  | ENSMUSG00000050945 | Zfp438    | 1  |
| ENSMUSG00000114937 | Gm30054 | 20 | ENSMUSG00000068130 | Zfp442    | 20 |
| ENSMUSG00000108513 | Gm30075 | 20 | ENSMUSG00000044876 | Zfp444    | 1  |
| ENSMUSG00000112433 | Gm30122 | 20 | ENSMUSG00000047036 | Zfp445    | 20 |
| ENSMUSG00000103965 | Gm30173 | 3  | ENSMUSG00000033961 | Zfp446    | 20 |
| ENSMUSG00000103898 | Gm30238 | 20 | ENSMUSG00000073176 | Zfp449    | 20 |
| ENSMUSG00000111066 | Gm30313 | 20 | ENSMUSG00000042197 | Zfp451    | 3  |
| ENSMUSG00000110388 | Gm30329 | 1  | ENSMUSG00000048728 | Zfp454    | 9  |
| ENSMUSG00000104411 | Gm30340 | 20 | ENSMUSG00000051037 | Zfp455    | 20 |
| ENSMUSG00000116525 | Gm30371 | 20 | ENSMUSG00000078995 | Zfp456    | 20 |
| ENSMUSG00000111758 | Gm30373 | 20 | ENSMUSG00000055341 | Zfp457    | 20 |
| ENSMUSG00000106515 | Gm30382 | 20 | ENSMUSG00000055480 | Zfp458    | 3  |
| ENSMUSG00000109776 | Gm30400 | 20 | ENSMUSG00000055560 | Zfp459    | 20 |
| ENSMUSG00000113257 | Gm30409 | 20 | ENSMUSG00000051351 | Zfp46     | 9  |
| ENSMUSG00000110260 | Gm30504 | 18 | ENSMUSG00000060206 | Zfp462    | 9  |
| ENSMUSG00000101462 | Gm3052  | 1  | ENSMUSG00000068551 | Zfp467    | 20 |
| ENSMUSG00000117013 | Gm30531 | 20 | ENSMUSG00000043903 | Zfp469    | 20 |
| ENSMUSG00000118369 | Gm30541 | 1  | ENSMUSG00000053600 | Zfp472    | 20 |
| ENSMUSG00000094622 | Gm3055  | 20 | ENSMUSG00000048012 | Zfp473    | 20 |
| ENSMUSG00000115965 | Gm30564 | 18 | ENSMUSG00000044519 | Zfp488    | 1  |
| ENSMUSG00000117980 | Gm30571 | 20 | ENSMUSG00000090659 | Zfp493    | 10 |
| ENSMUSG00000113459 | Gm30655 | 20 | ENSMUSG00000039081 | Zfp503    | 20 |
| ENSMUSG00000111090 | Gm30698 | 20 | ENSMUSG00000044452 | Zfp507    | 12 |
| ENSMUSG00000107859 | Gm30731 | 20 | ENSMUSG00000023892 | Zfp51     | 20 |
| ENSMUSG00000113456 | Gm30738 | 16 | ENSMUSG00000025470 | Zfp511    | 20 |

|                    |         |    |                    |         |    |
|--------------------|---------|----|--------------------|---------|----|
| ENSMUSG0000090114  | Gm3076  | 12 | ENSMUSG0000062761  | Zfp512  | 20 |
| ENSMUSG00000114697 | Gm30806 | 1  | ENSMUSG0000000823  | Zfp512b | 20 |
| ENSMUSG00000103624 | Gm3081  | 20 | ENSMUSG00000043059 | Zfp513  | 1  |
| ENSMUSG0000079076  | Gm3086  | 20 | ENSMUSG00000058881 | Zfp516  | 20 |
| ENSMUSG00000109341 | Gm30873 | 12 | ENSMUSG00000049164 | Zfp518a | 20 |
| ENSMUSG00000115637 | Gm30970 | 20 | ENSMUSG00000046572 | Zfp518b | 20 |
| ENSMUSG00000109015 | Gm31024 | 20 | ENSMUSG00000051341 | Zfp52   | 3  |
| ENSMUSG00000117674 | Gm31087 | 1  | ENSMUSG00000024420 | Zfp521  | 20 |
| ENSMUSG00000114621 | Gm31107 | 9  | ENSMUSG00000024220 | Zfp523  | 9  |
| ENSMUSG00000110320 | Gm31152 | 20 | ENSMUSG00000051184 | Zfp524  | 20 |
| ENSMUSG00000109695 | Gm31166 | 20 | ENSMUSG00000046541 | Zfp526  | 20 |
| ENSMUSG00000113244 | Gm31218 | 20 | ENSMUSG00000057409 | Zfp53   | 18 |
| ENSMUSG00000114396 | Gm31227 | 20 | ENSMUSG00000042439 | Zfp532  | 20 |
| ENSMUSG00000115610 | Gm31251 | 16 | ENSMUSG00000043456 | Zfp536  | 20 |
| ENSMUSG00000115591 | Gm31282 | 9  | ENSMUSG00000023882 | Zfp54   | 20 |
| ENSMUSG00000116589 | Gm31323 | 9  | ENSMUSG00000078796 | Zfp541  | 9  |
| ENSMUSG00000113986 | Gm31333 | 20 | ENSMUSG00000034071 | Zfp551  | 20 |
| ENSMUSG00000118099 | Gm31356 | 19 | ENSMUSG00000045598 | Zfp553  | 20 |
| ENSMUSG00000099797 | Gm3145  | 20 | ENSMUSG00000074500 | Zfp558  | 20 |
| ENSMUSG00000109632 | Gm31479 | 2  | ENSMUSG00000045519 | Zfp560  | 16 |
| ENSMUSG00000113387 | Gm31508 | 20 | ENSMUSG00000067424 | Zfp563  | 20 |
| ENSMUSG00000114789 | Gm31577 | 20 | ENSMUSG00000078768 | Zfp566  | 20 |
| ENSMUSG00000109602 | Gm31597 | 20 | ENSMUSG00000074221 | Zfp568  | 20 |
| ENSMUSG00000085371 | Gm3160  | 20 | ENSMUSG00000036036 | Zfp57   | 17 |
| ENSMUSG00000111236 | Gm31614 | 1  | ENSMUSG00000045252 | Zfp574  | 20 |
| ENSMUSG00000117358 | Gm31645 | 12 | ENSMUSG00000066721 | Zfp575  | 20 |
| ENSMUSG00000114662 | Gm31683 | 9  | ENSMUSG00000051550 | Zfp579  | 13 |
| ENSMUSG00000108617 | Gm31749 | 20 | ENSMUSG00000071291 | Zfp58   | 20 |
| ENSMUSG00000112925 | Gm31763 | 20 | ENSMUSG00000055633 | Zfp580  | 20 |
| ENSMUSG00000112742 | Gm31793 | 20 | ENSMUSG00000030443 | Zfp583  | 20 |
| ENSMUSG00000111620 | Gm31848 | 20 | ENSMUSG00000078779 | Zfp59   | 20 |
| ENSMUSG00000118074 | Gm31907 | 20 | ENSMUSG00000005621 | Zfp592  | 3  |
| ENSMUSG00000112422 | Gm31938 | 20 | ENSMUSG00000028840 | Zfp593  | 20 |
| ENSMUSG00000114639 | Gm31946 | 18 | ENSMUSG00000057842 | Zfp595  | 20 |
| ENSMUSG00000097388 | Gm3200  | 20 | ENSMUSG00000039789 | Zfp597  | 20 |
| ENSMUSG00000110623 | Gm32005 | 20 | ENSMUSG00000041130 | Zfp598  | 20 |
| ENSMUSG00000111602 | Gm32014 | 20 | ENSMUSG00000062794 | Zfp599  | 20 |
| ENSMUSG00000109118 | Gm32031 | 20 | ENSMUSG00000037640 | Zfp60   | 20 |
| ENSMUSG00000113313 | Gm32036 | 1  | ENSMUSG00000023284 | Zfp605  | 20 |
| ENSMUSG00000110633 | Gm32122 | 20 | ENSMUSG00000030386 | Zfp606  | 20 |
| ENSMUSG00000112945 | Gm32151 | 20 | ENSMUSG00000020420 | Zfp607a | 20 |
| ENSMUSG00000115431 | Gm3219  | 20 | ENSMUSG00000057093 | Zfp607b | 20 |
| ENSMUSG00000103114 | Gm32200 | 20 | ENSMUSG00000052713 | Zfp608  | 19 |
| ENSMUSG00000079311 | Gm3222  | 20 | ENSMUSG00000040524 | Zfp609  | 20 |
| ENSMUSG00000114271 | Gm32224 | 20 | ENSMUSG00000050605 | Zfp61   | 20 |
| ENSMUSG00000114547 | Gm3226  | 9  | ENSMUSG00000044676 | Zfp612  | 20 |
| ENSMUSG00000117648 | Gm32282 | 20 | ENSMUSG00000066880 | Zfp617  | 20 |
| ENSMUSG00000104011 | Gm32391 | 10 | ENSMUSG00000028358 | Zfp618  | 20 |
| ENSMUSG00000112404 | Gm32442 | 20 | ENSMUSG00000068959 | Zfp619  | 20 |
| ENSMUSG00000102729 | Gm32444 | 20 | ENSMUSG00000046311 | Zfp62   | 9  |
| ENSMUSG00000091275 | Gm3248  | 20 | ENSMUSG00000052253 | Zfp622  | 20 |
| ENSMUSG00000107902 | Gm32592 | 20 | ENSMUSG00000050846 | Zfp623  | 1  |
| ENSMUSG00000115317 | Gm32618 | 20 | ENSMUSG00000030604 | Zfp626  | 2  |
| ENSMUSG00000108393 | Gm32633 | 2  | ENSMUSG00000074406 | Zfp628  | 20 |
| ENSMUSG00000108532 | Gm32647 | 9  | ENSMUSG00000045639 | Zfp629  | 18 |

|                    |         |    |                    |          |    |
|--------------------|---------|----|--------------------|----------|----|
| ENSMUSG00000116891 | Gm32679 | 9  | ENSMUSG00000059689 | Zfp637   | 10 |
| ENSMUSG00000113528 | Gm32699 | 20 | ENSMUSG00000030016 | Zfp638   | 20 |
| ENSMUSG00000109590 | Gm32710 | 20 | ENSMUSG00000027667 | Zfp639   | 20 |
| ENSMUSG00000078967 | Gm3272  | 20 | ENSMUSG00000027551 | Zfp64    | 20 |
| ENSMUSG00000109958 | Gm32786 | 20 | ENSMUSG00000022987 | Zfp641   | 20 |
| ENSMUSG00000112252 | Gm32802 | 20 | ENSMUSG00000049606 | Zfp644   | 8  |
| ENSMUSG00000115777 | Gm32815 | 20 | ENSMUSG00000049739 | Zfp646   | 20 |
| ENSMUSG00000109857 | Gm32817 | 20 | ENSMUSG00000054967 | Zfp647   | 9  |
| ENSMUSG00000112323 | Gm32828 | 20 | ENSMUSG00000071281 | Zfp65    | 20 |
| ENSMUSG00000112959 | Gm32834 | 10 | ENSMUSG00000013419 | Zfp651   | 20 |
| ENSMUSG00000110480 | Gm32842 | 20 | ENSMUSG00000075595 | Zfp652   | 20 |
| ENSMUSG00000109203 | Gm32849 | 20 | ENSMUSG00000086191 | Zfp652os | 20 |
| ENSMUSG00000111915 | Gm3285  | 20 | ENSMUSG00000038895 | Zfp653   | 12 |
| ENSMUSG00000110605 | Gm32856 | 20 | ENSMUSG00000047141 | Zfp654   | 20 |
| ENSMUSG00000111474 | Gm32926 | 20 | ENSMUSG00000007812 | Zfp655   | 1  |
| ENSMUSG00000092090 | Gm3294  | 20 | ENSMUSG00000056592 | Zfp658   | 20 |
| ENSMUSG00000108713 | Gm33027 | 20 | ENSMUSG00000034800 | Zfp661   | 20 |
| ENSMUSG00000109853 | Gm33045 | 20 | ENSMUSG00000079215 | Zfp664   | 20 |
| ENSMUSG00000093751 | Gm3307  | 20 | ENSMUSG00000054893 | Zfp667   | 20 |
| ENSMUSG00000110125 | Gm33148 | 20 | ENSMUSG00000049728 | Zfp668   | 6  |
| ENSMUSG00000113780 | Gm33195 | 20 | ENSMUSG00000049755 | Zfp672   | 20 |
| ENSMUSG00000117604 | Gm33228 | 20 | ENSMUSG00000062743 | Zfp677   | 20 |
| ENSMUSG00000113836 | Gm3325  | 20 | ENSMUSG00000058291 | Zfp68    | 20 |
| ENSMUSG00000102771 | Gm33320 | 20 | ENSMUSG00000019338 | Zfp687   | 20 |
| ENSMUSG00000102969 | Gm33366 | 20 | ENSMUSG00000045251 | Zfp688   | 20 |
| ENSMUSG00000117375 | Gm33373 | 20 | ENSMUSG00000048921 | Zfp689   | 20 |
| ENSMUSG00000112790 | Gm33378 | 9  | ENSMUSG00000064141 | Zfp69    | 20 |
| ENSMUSG00000114446 | Gm33524 | 20 | ENSMUSG00000045268 | Zfp691   | 20 |
| ENSMUSG00000104237 | Gm33533 | 9  | ENSMUSG00000037243 | Zfp692   | 20 |
| ENSMUSG00000089883 | Gm3355  | 12 | ENSMUSG00000050064 | Zfp697   | 5  |
| ENSMUSG00000110205 | Gm33594 | 16 | ENSMUSG00000033669 | Zfp7     | 9  |
| ENSMUSG00000101439 | Gm336   | 20 | ENSMUSG00000085795 | Zfp703   | 20 |
| ENSMUSG00000085442 | Gm3362  | 12 | ENSMUSG00000040209 | Zfp704   | 1  |
| ENSMUSG00000105224 | Gm3364  | 20 | ENSMUSG00000062397 | Zfp706   | 1  |
| ENSMUSG00000111594 | Gm3365  | 12 | ENSMUSG00000034429 | Zfp707   | 16 |
| ENSMUSG00000104939 | Gm33651 | 19 | ENSMUSG00000056019 | Zfp709   | 9  |
| ENSMUSG00000112054 | Gm33680 | 17 | ENSMUSG00000048897 | Zfp710   | 18 |
| ENSMUSG00000111147 | Gm33699 | 20 | ENSMUSG00000025529 | Zfp711   | 20 |
| ENSMUSG00000102298 | Gm33707 | 20 | ENSMUSG00000090641 | Zfp712   | 20 |
| ENSMUSG00000117437 | Gm33727 | 9  | ENSMUSG00000012640 | Zfp715   | 1  |
| ENSMUSG00000113625 | Gm3379  | 20 | ENSMUSG00000030469 | Zfp719   | 1  |
| ENSMUSG00000111792 | Gm33858 | 20 | ENSMUSG00000069184 | Zfp72    | 20 |
| ENSMUSG00000112358 | Gm33869 | 20 | ENSMUSG00000021510 | Zfp729a  | 1  |
| ENSMUSG00000109733 | Gm33940 | 20 | ENSMUSG00000058093 | Zfp729b  | 9  |
| ENSMUSG00000117473 | Gm33948 | 20 | ENSMUSG00000048280 | Zfp738   | 20 |
| ENSMUSG00000111293 | Gm34006 | 20 | ENSMUSG00000059975 | Zfp74    | 20 |
| ENSMUSG00000111097 | Gm34069 | 9  | ENSMUSG00000046897 | Zfp740   | 20 |
| ENSMUSG00000106883 | Gm34091 | 20 | ENSMUSG00000057691 | Zfp746   | 20 |
| ENSMUSG00000079396 | Gm3411  | 20 | ENSMUSG00000054381 | Zfp747   | 5  |
| ENSMUSG00000108659 | Gm34121 | 20 | ENSMUSG00000095432 | Zfp748   | 20 |
| ENSMUSG00000102922 | Gm34176 | 9  | ENSMUSG00000039238 | Zfp750   | 20 |
| ENSMUSG00000114045 | Gm34220 | 20 | ENSMUSG00000044501 | Zfp758   | 20 |
| ENSMUSG00000113330 | Gm34237 | 20 | ENSMUSG00000057396 | Zfp759   | 6  |
| ENSMUSG00000105542 | Gm34248 | 20 | ENSMUSG00000067928 | Zfp760   | 20 |
| ENSMUSG00000116793 | Gm34256 | 20 | ENSMUSG00000067430 | Zfp763   | 20 |

|                    |         |    |                    |           |    |
|--------------------|---------|----|--------------------|-----------|----|
| ENSMUSG00000109559 | Gm34280 | 20 | ENSMUSG00000045757 | Zfp764    | 20 |
| ENSMUSG00000103662 | Gm34294 | 9  | ENSMUSG00000047371 | Zfp768    | 20 |
| ENSMUSG00000112763 | Gm34304 | 20 | ENSMUSG00000040321 | Zfp770    | 3  |
| ENSMUSG00000116895 | Gm3435  | 20 | ENSMUSG00000054716 | Zfp771    | 20 |
| ENSMUSG00000114854 | Gm34354 | 20 | ENSMUSG00000066838 | Zfp772    | 4  |
| ENSMUSG00000096160 | Gm3436  | 20 | ENSMUSG00000063535 | Zfp773    | 3  |
| ENSMUSG00000115319 | Gm34417 | 20 | ENSMUSG00000007216 | Zfp775    | 20 |
| ENSMUSG00000110653 | Gm34418 | 20 | ENSMUSG00000071477 | Zfp777    | 20 |
| ENSMUSG00000114715 | Gm34471 | 20 | ENSMUSG00000055150 | Zfp78     | 20 |
| ENSMUSG00000117185 | Gm34510 | 20 | ENSMUSG00000063047 | Zfp780b   | 20 |
| ENSMUSG00000113031 | Gm34552 | 20 | ENSMUSG00000072653 | Zfp783    | 9  |
| ENSMUSG00000113982 | Gm34557 | 1  | ENSMUSG00000043290 | Zfp784    | 20 |
| ENSMUSG00000117254 | Gm34567 | 5  | ENSMUSG00000051499 | Zfp786    | 20 |
| ENSMUSG00000112805 | Gm34574 | 20 | ENSMUSG00000046792 | Zfp787    | 20 |
| ENSMUSG00000107272 | Gm34583 | 20 | ENSMUSG00000074165 | Zfp788    | 20 |
| ENSMUSG00000115816 | Gm34589 | 20 | ENSMUSG00000011427 | Zfp790    | 20 |
| ENSMUSG00000115333 | Gm34590 | 20 | ENSMUSG00000074194 | Zfp791    | 20 |
| ENSMUSG00000105577 | Gm34599 | 20 | ENSMUSG00000095253 | Zfp799    | 20 |
| ENSMUSG00000110863 | Gm34655 | 20 | ENSMUSG00000039841 | Zfp800    | 20 |
| ENSMUSG00000114200 | Gm34721 | 1  | ENSMUSG00000070866 | Zfp804a   | 18 |
| ENSMUSG00000112168 | Gm34776 | 20 | ENSMUSG00000092094 | Zfp804b   | 18 |
| ENSMUSG00000114623 | Gm34788 | 13 | ENSMUSG00000074867 | Zfp808    | 20 |
| ENSMUSG00000115762 | Gm34907 | 20 | ENSMUSG00000057982 | Zfp809    | 20 |
| ENSMUSG00000115100 | Gm34934 | 9  | ENSMUSG00000003929 | Zfp81     | 20 |
| ENSMUSG00000116250 | Gm34939 | 9  | ENSMUSG00000066829 | Zfp810    | 10 |
| ENSMUSG00000115326 | Gm35019 | 20 | ENSMUSG00000055202 | Zfp811    | 20 |
| ENSMUSG00000109714 | Gm35021 | 20 | ENSMUSG00000098022 | Zfp82     | 20 |
| ENSMUSG00000108616 | Gm35040 | 1  | ENSMUSG00000069743 | Zfp820    | 18 |
| ENSMUSG00000096936 | Gm3510  | 7  | ENSMUSG00000031728 | Zfp821    | 20 |
| ENSMUSG00000105031 | Gm3511  | 10 | ENSMUSG00000069208 | Zfp825    | 20 |
| ENSMUSG00000089746 | Gm3513  | 20 | ENSMUSG00000071064 | Zfp827    | 2  |
| ENSMUSG00000113121 | Gm35161 | 19 | ENSMUSG00000046010 | Zfp830    | 20 |
| ENSMUSG00000110554 | Gm35256 | 20 | ENSMUSG00000050600 | Zfp831    | 9  |
| ENSMUSG00000114774 | Gm35281 | 20 | ENSMUSG00000021271 | Zfp839    | 1  |
| ENSMUSG00000089782 | Gm3531  | 20 | ENSMUSG00000046185 | Zfp84     | 20 |
| ENSMUSG00000109771 | Gm35315 | 20 | ENSMUSG00000058192 | Zfp846    | 20 |
| ENSMUSG00000109179 | Gm35339 | 20 | ENSMUSG00000058331 | Zfp85     | 1  |
| ENSMUSG00000098192 | Gm3534  | 20 | ENSMUSG00000096916 | Zfp850    | 20 |
| ENSMUSG00000105686 | Gm35394 | 9  | ENSMUSG00000093910 | Zfp853    | 20 |
| ENSMUSG00000112195 | Gm35405 | 20 | ENSMUSG00000044081 | Zfp85os   | 20 |
| ENSMUSG00000118020 | Gm35438 | 20 | ENSMUSG00000107476 | Zfp862-ps | 20 |
| ENSMUSG00000106240 | Gm3544  | 15 | ENSMUSG00000074405 | Zfp865    | 20 |
| ENSMUSG00000078240 | Gm3550  | 20 | ENSMUSG00000043090 | Zfp866    | 20 |
| ENSMUSG00000111068 | Gm35501 | 20 | ENSMUSG00000054519 | Zfp867    | 20 |
| ENSMUSG00000089791 | Gm3555  | 20 | ENSMUSG00000060427 | Zfp868    | 1  |
| ENSMUSG00000113702 | Gm35558 | 1  | ENSMUSG00000054648 | Zfp869    | 1  |
| ENSMUSG00000113662 | Gm35558 | 20 | ENSMUSG00000097333 | Zfp87     | 20 |
| ENSMUSG00000115912 | Gm35569 | 20 | ENSMUSG00000095325 | Zfp870    | 6  |
| ENSMUSG00000112721 | Gm35608 | 9  | ENSMUSG00000024298 | Zfp871    | 20 |
| ENSMUSG00000113188 | Gm35638 | 20 | ENSMUSG00000061371 | Zfp873    | 20 |
| ENSMUSG00000090610 | Gm3571  | 20 | ENSMUSG00000069206 | Zfp874a   | 20 |
| ENSMUSG00000113666 | Gm35725 | 20 | ENSMUSG00000059839 | Zfp874b   | 1  |
| ENSMUSG00000107851 | Gm35736 | 18 | ENSMUSG00000044296 | Zfp879    | 20 |
| ENSMUSG00000113941 | Gm35755 | 9  | ENSMUSG00000089857 | Zfp882    | 20 |
| ENSMUSG00000115311 | Gm35823 | 20 | ENSMUSG00000072623 | Zfp9      | 20 |

|                    |         |    |                    |         |    |
|--------------------|---------|----|--------------------|---------|----|
| ENSMUSG00000110862 | Gm35835 | 20 | ENSMUSG00000031907 | Zfp90   | 9  |
| ENSMUSG00000109028 | Gm35842 | 18 | ENSMUSG00000024695 | Zfp91   | 3  |
| ENSMUSG00000109870 | Gm35850 | 20 | ENSMUSG00000031374 | Zfp92   | 1  |
| ENSMUSG00000110532 | Gm35857 | 10 | ENSMUSG00000055305 | Zfp93   | 13 |
| ENSMUSG00000117848 | Gm35867 | 20 | ENSMUSG00000059897 | Zfp930  | 20 |
| ENSMUSG00000096904 | Gm3591  | 20 | ENSMUSG00000078861 | Zfp931  | 20 |
| ENSMUSG00000118380 | Gm36037 | 9  | ENSMUSG00000066613 | Zfp932  | 18 |
| ENSMUSG00000094942 | Gm3604  | 9  | ENSMUSG00000059423 | Zfp933  | 2  |
| ENSMUSG00000067017 | Gm3608  | 20 | ENSMUSG00000074865 | Zfp934  | 20 |
| ENSMUSG00000114810 | Gm36101 | 1  | ENSMUSG00000060336 | Zfp937  | 20 |
| ENSMUSG00000092563 | Gm3617  | 20 | ENSMUSG00000062931 | Zfp938  | 20 |
| ENSMUSG00000112653 | Gm36176 | 20 | ENSMUSG00000030424 | Zfp939  | 1  |
| ENSMUSG00000113774 | Gm36236 | 20 | ENSMUSG00000074282 | Zfp94   | 20 |
| ENSMUSG00000106617 | Gm36266 | 20 | ENSMUSG00000050855 | Zfp940  | 1  |
| ENSMUSG00000112532 | Gm36283 | 20 | ENSMUSG00000060314 | Zfp941  | 6  |
| ENSMUSG00000114172 | Gm36298 | 20 | ENSMUSG00000071267 | Zfp942  | 20 |
| ENSMUSG00000114457 | Gm36346 | 20 | ENSMUSG00000053347 | Zfp943  | 9  |
| ENSMUSG00000109598 | Gm36356 | 20 | ENSMUSG00000033972 | Zfp944  | 20 |
| ENSMUSG00000091754 | Gm3636  | 19 | ENSMUSG00000059142 | Zfp945  | 18 |
| ENSMUSG00000109108 | Gm36371 | 20 | ENSMUSG00000071266 | Zfp946  | 20 |
| ENSMUSG00000107082 | Gm36378 | 20 | ENSMUSG00000063383 | Zfp947  | 2  |
| ENSMUSG00000103961 | Gm36388 | 20 | ENSMUSG00000067931 | Zfp948  | 20 |
| ENSMUSG00000114138 | Gm36423 | 13 | ENSMUSG00000032425 | Zfp949  | 20 |
| ENSMUSG00000110393 | Gm36445 | 20 | ENSMUSG00000074733 | Zfp950  | 20 |
| ENSMUSG00000106692 | Gm36447 | 20 | ENSMUSG00000072774 | Zfp951  | 20 |
| ENSMUSG00000117575 | Gm36486 | 20 | ENSMUSG00000053390 | Zfp952  | 20 |
| ENSMUSG00000114018 | Gm36495 | 20 | ENSMUSG00000098905 | Zfp953  | 20 |
| ENSMUSG00000097891 | Gm3650  | 20 | ENSMUSG00000062116 | Zfp954  | 1  |
| ENSMUSG00000113690 | Gm36501 | 9  | ENSMUSG00000094441 | Zfp955a | 11 |
| ENSMUSG00000103238 | Gm36527 | 2  | ENSMUSG00000096910 | Zfp955b | 20 |
| ENSMUSG00000118249 | Gm36608 | 20 | ENSMUSG00000045466 | Zfp956  | 20 |
| ENSMUSG00000104214 | Gm36638 | 20 | ENSMUSG00000058748 | Zfp958  | 20 |
| ENSMUSG00000102635 | Gm36638 | 20 | ENSMUSG00000003198 | Zfp959  | 20 |
| ENSMUSG00000090691 | Gm3667  | 20 | ENSMUSG00000096696 | Zfp960  | 20 |
| ENSMUSG00000098232 | Gm3671  | 20 | ENSMUSG00000052446 | Zfp961  | 20 |
| ENSMUSG00000110396 | Gm36737 | 1  | ENSMUSG00000092260 | Zfp963  | 20 |
| ENSMUSG00000116965 | Gm36742 | 10 | ENSMUSG00000091764 | Zfp964  | 16 |
| ENSMUSG00000113088 | Gm36757 | 20 | ENSMUSG00000095990 | Zfp97   | 19 |
| ENSMUSG00000105516 | Gm36823 | 20 | ENSMUSG00000078866 | Zfp970  | 20 |
| ENSMUSG00000113170 | Gm36839 | 20 | ENSMUSG00000074519 | Zfp971  | 20 |
| ENSMUSG00000109981 | Gm36849 | 20 | ENSMUSG00000074529 | Zfp972  | 20 |
| ENSMUSG00000111110 | Gm36855 | 20 | ENSMUSG00000070709 | Zfp974  | 20 |
| ENSMUSG00000104240 | Gm36858 | 20 | ENSMUSG00000069727 | Zfp975  | 20 |
| ENSMUSG00000115138 | Gm36899 | 20 | ENSMUSG00000074158 | Zfp976  | 9  |
| ENSMUSG00000112630 | Gm36908 | 20 | ENSMUSG00000092335 | Zfp977  | 20 |
| ENSMUSG00000098128 | Gm3693  | 20 | ENSMUSG00000066000 | Zfp979  | 20 |
| ENSMUSG00000103778 | Gm36930 | 20 | ENSMUSG00000078496 | Zfp982  | 1  |
| ENSMUSG00000103779 | Gm36931 | 20 | ENSMUSG00000035868 | Zfp983  | 3  |
| ENSMUSG00000103774 | Gm36932 | 1  | ENSMUSG00000078495 | Zfp984  | 17 |
| ENSMUSG00000103772 | Gm36933 | 20 | ENSMUSG00000067916 | Zfp991  | 20 |
| ENSMUSG00000102410 | Gm36935 | 1  | ENSMUSG00000070605 | Zfp992  | 10 |
| ENSMUSG00000102411 | Gm36936 | 20 | ENSMUSG00000096433 | Zfp994  | 20 |
| ENSMUSG00000102417 | Gm36939 | 20 | ENSMUSG00000078546 | Zfp995  | 20 |
| ENSMUSG00000102419 | Gm36940 | 20 | ENSMUSG00000024792 | Zfpl1   | 20 |
| ENSMUSG00000102160 | Gm36944 | 20 | ENSMUSG00000049577 | Zfpm1   | 9  |

|                    |         |    |                    |          |    |
|--------------------|---------|----|--------------------|----------|----|
| ENSMUSG00000103445 | Gm36948 | 20 | ENSMUSG00000022306 | Zfpm2    | 20 |
| ENSMUSG00000104138 | Gm36949 | 20 | ENSMUSG00000022201 | Zfr      | 4  |
| ENSMUSG00000067224 | Gm3695  | 9  | ENSMUSG00000034949 | Zfr2     | 20 |
| ENSMUSG00000104130 | Gm36951 | 20 | ENSMUSG00000079509 | Zfx      | 20 |
| ENSMUSG00000104132 | Gm36952 | 2  | ENSMUSG00000042628 | Zfyve1   | 20 |
| ENSMUSG00000104136 | Gm36955 | 20 | ENSMUSG00000021706 | Zfyve16  | 20 |
| ENSMUSG00000103931 | Gm36962 | 20 | ENSMUSG00000068580 | Zfyve19  | 12 |
| ENSMUSG00000103932 | Gm36963 | 20 | ENSMUSG00000021286 | Zfyve21  | 3  |
| ENSMUSG00000103060 | Gm36969 | 20 | ENSMUSG00000066440 | Zfyve26  | 12 |
| ENSMUSG00000102494 | Gm36988 | 20 | ENSMUSG00000018820 | Zfyve27  | 20 |
| ENSMUSG00000102496 | Gm36989 | 20 | ENSMUSG00000037224 | Zfyve28  | 9  |
| ENSMUSG00000094955 | Gm3699  | 12 | ENSMUSG00000034557 | Zfyve9   | 19 |
| ENSMUSG00000103436 | Gm36995 | 10 | ENSMUSG00000027582 | Zgpat    | 9  |
| ENSMUSG00000102287 | Gm37003 | 20 | ENSMUSG00000051278 | Zgrf1    | 1  |
| ENSMUSG00000103884 | Gm37005 | 20 | ENSMUSG00000071757 | Zhx2     | 9  |
| ENSMUSG00000103885 | Gm37006 | 9  | ENSMUSG00000035877 | Zhx3     | 12 |
| ENSMUSG00000103887 | Gm37008 | 20 | ENSMUSG00000032368 | Zic1     | 18 |
| ENSMUSG00000103889 | Gm37011 | 2  | ENSMUSG00000061524 | Zic2     | 18 |
| ENSMUSG00000102956 | Gm37017 | 9  | ENSMUSG00000067860 | Zic3     | 18 |
| ENSMUSG00000102950 | Gm37018 | 1  | ENSMUSG00000036972 | Zic4     | 6  |
| ENSMUSG00000102953 | Gm37019 | 20 | ENSMUSG00000041703 | Zic5     | 20 |
| ENSMUSG00000103609 | Gm37022 | 20 | ENSMUSG00000030393 | Zik1     | 20 |
| ENSMUSG00000104078 | Gm37023 | 19 | ENSMUSG00000002266 | Zim1     | 17 |
| ENSMUSG00000104388 | Gm37033 | 20 | ENSMUSG00000029729 | Zkscan1  | 1  |
| ENSMUSG00000102565 | Gm37036 | 20 | ENSMUSG00000029627 | Zkscan14 | 20 |
| ENSMUSG00000104221 | Gm37051 | 2  | ENSMUSG00000038630 | Zkscan16 | 20 |
| ENSMUSG00000103343 | Gm37052 | 12 | ENSMUSG00000020472 | Zkscan17 | 20 |
| ENSMUSG00000103348 | Gm37053 | 20 | ENSMUSG00000030757 | Zkscan2  | 20 |
| ENSMUSG00000102753 | Gm37056 | 20 | ENSMUSG00000021327 | Zkscan3  | 20 |
| ENSMUSG00000102750 | Gm37058 | 20 | ENSMUSG00000054931 | Zkscan4  | 20 |
| ENSMUSG00000103808 | Gm37060 | 20 | ENSMUSG00000055991 | Zkscan5  | 20 |
| ENSMUSG00000103809 | Gm37061 | 20 | ENSMUSG00000018347 | Zkscan6  | 1  |
| ENSMUSG00000103804 | Gm37062 | 20 | ENSMUSG00000063488 | Zkscan7  | 20 |
| ENSMUSG00000103805 | Gm37063 | 19 | ENSMUSG00000111063 | Zkscan7  | 20 |
| ENSMUSG00000103803 | Gm37064 | 20 | ENSMUSG00000063894 | Zkscan8  | 20 |
| ENSMUSG00000104410 | Gm37066 | 20 | ENSMUSG00000052676 | Zmat1    | 20 |
| ENSMUSG00000104416 | Gm37067 | 20 | ENSMUSG00000001383 | Zmat2    | 1  |
| ENSMUSG00000104415 | Gm37069 | 1  | ENSMUSG00000027663 | Zmat3    | 20 |
| ENSMUSG00000104418 | Gm37070 | 20 | ENSMUSG00000037492 | Zmat4    | 18 |
| ENSMUSG00000103685 | Gm37074 | 18 | ENSMUSG00000009076 | Zmat5    | 20 |
| ENSMUSG00000102659 | Gm37077 | 20 | ENSMUSG00000007817 | Zmiz1    | 20 |
| ENSMUSG00000102653 | Gm37079 | 20 | ENSMUSG00000087535 | Zmiz1os1 | 20 |
| ENSMUSG00000102651 | Gm37080 | 20 | ENSMUSG00000041164 | Zmiz2    | 20 |
| ENSMUSG00000102850 | Gm37082 | 20 | ENSMUSG00000043207 | Zmpste24 | 20 |
| ENSMUSG00000102856 | Gm37084 | 20 | ENSMUSG00000043872 | Zmym1    | 20 |
| ENSMUSG00000103183 | Gm37090 | 18 | ENSMUSG00000021945 | Zmym2    | 3  |
| ENSMUSG00000102449 | Gm37100 | 6  | ENSMUSG00000031310 | Zmym3    | 3  |
| ENSMUSG00000102448 | Gm37101 | 20 | ENSMUSG00000042446 | Zmym4    | 20 |
| ENSMUSG00000102672 | Gm37105 | 20 | ENSMUSG00000040123 | Zmym5    | 18 |
| ENSMUSG00000102133 | Gm37106 | 20 | ENSMUSG00000042408 | Zmym6    | 20 |
| ENSMUSG00000102136 | Gm37107 | 3  | ENSMUSG00000010044 | Zmynd10  | 20 |
| ENSMUSG00000102135 | Gm37108 | 12 | ENSMUSG00000021156 | Zmynd11  | 4  |
| ENSMUSG00000104494 | Gm37111 | 20 | ENSMUSG00000070806 | Zmynd12  | 20 |
| ENSMUSG00000103572 | Gm37115 | 20 | ENSMUSG00000040829 | Zmynd15  | 20 |
| ENSMUSG00000103032 | Gm37121 | 4  | ENSMUSG00000026974 | Zmynd19  | 1  |



|                    |         |    |                    |          |    |
|--------------------|---------|----|--------------------|----------|----|
| ENSMUSG00000103039 | Gm37123 | 20 | ENSMUSG00000039671 | Zmynd8   | 1  |
| ENSMUSG00000103038 | Gm37124 | 20 | ENSMUSG00000084350 | Znf41-ps | 20 |
| ENSMUSG00000103443 | Gm37132 | 16 | ENSMUSG00000039501 | Znfx1    | 19 |
| ENSMUSG00000102874 | Gm37137 | 20 | ENSMUSG00000059518 | Znhit1   | 20 |
| ENSMUSG00000104149 | Gm37138 | 20 | ENSMUSG00000075227 | Znhit2   | 16 |
| ENSMUSG00000102875 | Gm37139 | 20 | ENSMUSG00000020526 | Znhit3   | 12 |
| ENSMUSG00000104140 | Gm37140 | 20 | ENSMUSG00000074182 | Znhit6   | 20 |
| ENSMUSG00000102929 | Gm37154 | 20 | ENSMUSG00000036315 | Znrd1    | 20 |
| ENSMUSG00000103233 | Gm37159 | 20 | ENSMUSG00000036214 | Znrd1as  | 1  |
| ENSMUSG00000103232 | Gm37160 | 20 | ENSMUSG00000079478 | Znrd2    | 20 |
| ENSMUSG00000104519 | Gm37161 | 20 | ENSMUSG00000033545 | Znrf1    | 9  |
| ENSMUSG00000104512 | Gm37165 | 20 | ENSMUSG00000058446 | Znrf2    | 9  |
| ENSMUSG00000102461 | Gm37166 | 20 | ENSMUSG00000041961 | Znrf3    | 1  |
| ENSMUSG00000103174 | Gm37168 | 20 | ENSMUSG00000042554 | Zp3r     | 20 |
| ENSMUSG00000104253 | Gm37174 | 20 | ENSMUSG00000020193 | Zpbp     | 20 |
| ENSMUSG00000103378 | Gm37176 | 9  | ENSMUSG00000032078 | Zpr1     | 9  |
| ENSMUSG00000103377 | Gm37180 | 19 | ENSMUSG00000030967 | Zranb1   | 20 |
| ENSMUSG00000102764 | Gm37183 | 2  | ENSMUSG00000028180 | Zranb2   | 20 |
| ENSMUSG00000103937 | Gm37186 | 20 | ENSMUSG00000036086 | Zranb3   | 20 |
| ENSMUSG00000103611 | Gm37195 | 20 | ENSMUSG00000044068 | Zrsr1    | 18 |
| ENSMUSG00000103657 | Gm37204 | 2  | ENSMUSG00000031370 | Zrsr2    | 20 |
| ENSMUSG00000103651 | Gm37206 | 20 | ENSMUSG00000036721 | Zscan12  | 20 |
| ENSMUSG00000104027 | Gm37211 | 7  | ENSMUSG00000070822 | Zscan18  | 20 |
| ENSMUSG00000104026 | Gm37212 | 9  | ENSMUSG00000038797 | Zscan2   | 20 |
| ENSMUSG00000104020 | Gm37215 | 20 | ENSMUSG00000061894 | Zscan20  | 12 |
| ENSMUSG00000102951 | Gm37216 | 20 | ENSMUSG00000037017 | Zscan21  | 20 |
| ENSMUSG00000102681 | Gm37221 | 20 | ENSMUSG00000054715 | Zscan22  | 9  |
| ENSMUSG00000102533 | Gm37226 | 20 | ENSMUSG00000070420 | Zscan25  | 20 |
| ENSMUSG00000102336 | Gm37233 | 9  | ENSMUSG00000022228 | Zscan26  | 1  |
| ENSMUSG00000102330 | Gm37234 | 20 | ENSMUSG00000050619 | Zscan29  | 20 |
| ENSMUSG00000103373 | Gm37238 | 3  | ENSMUSG00000024274 | Zscan30  | 20 |
| ENSMUSG00000106133 | Gm3724  | 20 | ENSMUSG00000017764 | Zswim1   | 20 |
| ENSMUSG00000102575 | Gm37241 | 20 | ENSMUSG00000045822 | Zswim3   | 20 |
| ENSMUSG00000103630 | Gm37242 | 20 | ENSMUSG00000035671 | Zswim4   | 20 |
| ENSMUSG00000102475 | Gm37246 | 20 | ENSMUSG00000033948 | Zswim5   | 9  |
| ENSMUSG00000103466 | Gm37247 | 20 | ENSMUSG00000032846 | Zswim6   | 9  |
| ENSMUSG00000103216 | Gm37248 | 20 | ENSMUSG00000014243 | Zswim7   | 20 |
| ENSMUSG00000103857 | Gm37249 | 20 | ENSMUSG00000021819 | Zswim8   | 20 |
| ENSMUSG00000103854 | Gm37250 | 20 | ENSMUSG00000070814 | Zswim9   | 2  |
| ENSMUSG00000104394 | Gm37254 | 20 | ENSMUSG00000039531 | Zup1     | 20 |
| ENSMUSG00000104449 | Gm37255 | 20 | ENSMUSG00000032264 | Zw10     | 20 |
| ENSMUSG00000102760 | Gm37258 | 2  | ENSMUSG00000032400 | Zwilch   | 20 |
| ENSMUSG00000103525 | Gm37262 | 20 | ENSMUSG00000019923 | Zwint    | 17 |
| ENSMUSG00000102605 | Gm37264 | 20 | ENSMUSG00000073060 | Zxda     | 20 |
| ENSMUSG00000102607 | Gm37265 | 9  | ENSMUSG00000073062 | Zxdb     | 20 |
| ENSMUSG00000102600 | Gm37266 | 20 | ENSMUSG00000034430 | Zxdc     | 2  |
| ENSMUSG00000103952 | Gm37268 | 20 | ENSMUSG00000034636 | Zyg11b   | 3  |
| ENSMUSG00000103285 | Gm37274 | 20 | ENSMUSG00000029860 | Zyx      | 9  |
| ENSMUSG00000103280 | Gm37277 | 18 | ENSMUSG00000055670 | Zzef1    | 20 |
| ENSMUSG00000103751 | Gm37283 | 20 | ENSMUSG00000039068 | Zzz3     | 20 |
| ENSMUSG00000103756 | Gm37285 | 20 | ENSMUSG00000024165 | Jpt2     | 20 |
| ENSMUSG00000102630 | Gm37289 | 3  | ENSMUSG00000097571 | Jpx      | 6  |
| ENSMUSG00000104113 | Gm37292 | 20 | ENSMUSG00000046380 | Jrk      | 20 |
| ENSMUSG00000104116 | Gm37296 | 20 | ENSMUSG00000079083 | Jrkl     | 3  |
| ENSMUSG00000104114 | Gm37297 | 1  | ENSMUSG00000020216 | Jsrp1    | 19 |

|                    |         |    |                    |             |    |
|--------------------|---------|----|--------------------|-------------|----|
| ENSMUSG00000104118 | Gm37298 | 20 | ENSMUSG00000027937 | Jtb         | 20 |
| ENSMUSG00000103133 | Gm37303 | 9  | ENSMUSG00000052684 | Jun         | 19 |
| ENSMUSG00000103041 | Gm37305 | 20 | ENSMUSG00000052837 | Junb        | 20 |
| ENSMUSG00000103046 | Gm37309 | 20 | ENSMUSG00000071076 | Jund        | 20 |
| ENSMUSG00000103047 | Gm37310 | 20 | ENSMUSG00000087366 | Junos       | 20 |
| ENSMUSG00000103049 | Gm37311 | 20 | ENSMUSG00000001552 | Jup         | 20 |
| ENSMUSG00000104094 | Gm37314 | 20 | ENSMUSG00000110630 | K230015D01F | 6  |
| ENSMUSG00000104324 | Gm37320 | 20 | ENSMUSG00000061751 | Kalrn       | 9  |
| ENSMUSG00000104325 | Gm37321 | 20 | ENSMUSG00000032702 | Kank1       | 9  |
| ENSMUSG00000103202 | Gm37326 | 20 | ENSMUSG00000032194 | Kank2       | 20 |
| ENSMUSG00000103200 | Gm37328 | 20 | ENSMUSG00000042099 | Kank3       | 20 |
| ENSMUSG00000103201 | Gm37329 | 19 | ENSMUSG00000035407 | Kank4       | 18 |
| ENSMUSG00000103209 | Gm37331 | 20 | ENSMUSG00000018412 | Kansl1      | 1  |
| ENSMUSG00000104524 | Gm37333 | 20 | ENSMUSG00000026004 | Kansl1l     | 20 |
| ENSMUSG00000104525 | Gm37334 | 20 | ENSMUSG00000022992 | Kansl2      | 19 |
| ENSMUSG00000102732 | Gm37342 | 20 | ENSMUSG00000097530 | Kansl2-ps   | 20 |
| ENSMUSG00000103947 | Gm37345 | 1  | ENSMUSG00000010453 | Kansl3      | 20 |
| ENSMUSG00000103593 | Gm37352 | 20 | ENSMUSG00000087403 | Kantr       | 20 |
| ENSMUSG00000103596 | Gm37354 | 20 | ENSMUSG00000031948 | Kars        | 3  |
| ENSMUSG00000103625 | Gm37357 | 20 | ENSMUSG00000027425 | Kat14       | 20 |
| ENSMUSG00000104017 | Gm37363 | 19 | ENSMUSG00000020918 | Kat2a       | 20 |
| ENSMUSG00000104010 | Gm37366 | 20 | ENSMUSG00000000708 | Kat2b       | 20 |
| ENSMUSG00000102508 | Gm37367 | 20 | ENSMUSG00000024926 | Kat5        | 20 |
| ENSMUSG00000102509 | Gm37368 | 20 | ENSMUSG00000031540 | Kat6a       | 20 |
| ENSMUSG00000102503 | Gm37370 | 20 | ENSMUSG00000021767 | Kat6b       | 9  |
| ENSMUSG00000102349 | Gm37376 | 20 | ENSMUSG00000038909 | Kat7        | 1  |
| ENSMUSG00000102831 | Gm37382 | 20 | ENSMUSG00000030801 | Kat8        | 20 |
| ENSMUSG00000102837 | Gm37383 | 20 | ENSMUSG00000041298 | Katnal1     | 18 |
| ENSMUSG00000091472 | Gm3739  | 1  | ENSMUSG00000025420 | Katnal2     | 18 |
| ENSMUSG00000103123 | Gm37390 | 12 | ENSMUSG00000031787 | Katnb1      | 3  |
| ENSMUSG00000103122 | Gm37391 | 20 | ENSMUSG00000027132 | Katnbl1     | 20 |
| ENSMUSG00000103129 | Gm37393 | 20 | ENSMUSG00000025213 | Kazald1     | 1  |
| ENSMUSG00000104205 | Gm37396 | 18 | ENSMUSG00000040606 | Kazn        | 9  |
| ENSMUSG00000104204 | Gm37397 | 20 | ENSMUSG00000055675 | Kbtbd11     | 9  |
| ENSMUSG00000104200 | Gm37399 | 20 | ENSMUSG00000033182 | Kbtbd12     | 20 |
| ENSMUSG00000103324 | Gm37402 | 20 | ENSMUSG00000059486 | Kbtbd2      | 12 |
| ENSMUSG00000103497 | Gm37407 | 20 | ENSMUSG00000025893 | Kbtbd3      | 20 |
| ENSMUSG00000103495 | Gm37409 | 20 | ENSMUSG00000075502 | Kbtbd6      | 5  |
| ENSMUSG00000103493 | Gm37411 | 20 | ENSMUSG00000043881 | Kbtbd7      | 2  |
| ENSMUSG00000103865 | Gm37416 | 20 | ENSMUSG00000030031 | Kbtbd8      | 20 |
| ENSMUSG00000103869 | Gm37420 | 3  | ENSMUSG00000055239 | Kcmf1       | 12 |
| ENSMUSG00000104435 | Gm37422 | 18 | ENSMUSG00000047976 | Kcna1       | 20 |
| ENSMUSG00000104436 | Gm37423 | 20 | ENSMUSG00000040724 | Kcna2       | 18 |
| ENSMUSG00000102670 | Gm37436 | 20 | ENSMUSG00000047959 | Kcna3       | 20 |
| ENSMUSG00000102673 | Gm37437 | 8  | ENSMUSG00000042604 | Kcna4       | 9  |
| ENSMUSG00000102581 | Gm37443 | 20 | ENSMUSG00000045534 | Kcna5       | 18 |
| ENSMUSG00000103984 | Gm37447 | 20 | ENSMUSG00000038077 | Kcna6       | 18 |
| ENSMUSG00000103882 | Gm37452 | 20 | ENSMUSG00000027827 | Kcnab1      | 9  |
| ENSMUSG00000104283 | Gm37459 | 20 | ENSMUSG00000028931 | Kcnab2      | 20 |
| ENSMUSG00000104282 | Gm37460 | 20 | ENSMUSG00000018470 | Kcnab3      | 18 |
| ENSMUSG00000102427 | Gm37463 | 20 | ENSMUSG00000086900 | Kcnab3os    | 20 |
| ENSMUSG00000102420 | Gm37464 | 20 | ENSMUSG00000050556 | Kcnb1       | 7  |
| ENSMUSG00000102423 | Gm37465 | 20 | ENSMUSG00000092083 | Kcnb2       | 12 |
| ENSMUSG00000103972 | Gm37466 | 1  | ENSMUSG00000058975 | Kcnc1       | 18 |
| ENSMUSG00000102157 | Gm37470 | 20 | ENSMUSG00000035681 | Kcnc2       | 18 |

|                    |         |    |                    |           |    |
|--------------------|---------|----|--------------------|-----------|----|
| ENSMUSG00000102151 | Gm37472 | 20 | ENSMUSG00000062785 | Kcnc3     | 18 |
| ENSMUSG00000102153 | Gm37474 | 20 | ENSMUSG00000027895 | Kcnc4     | 19 |
| ENSMUSG00000102801 | Gm37478 | 9  | ENSMUSG00000009731 | Kcnd1     | 10 |
| ENSMUSG00000102800 | Gm37479 | 20 | ENSMUSG00000060882 | Kcnd2     | 9  |
| ENSMUSG00000104121 | Gm37485 | 10 | ENSMUSG00000040896 | Kcnd3     | 19 |
| ENSMUSG00000104125 | Gm37488 | 20 | ENSMUSG00000074346 | Kcnd3os   | 20 |
| ENSMUSG00000102211 | Gm37490 | 20 | ENSMUSG00000090122 | Kcne1l    | 20 |
| ENSMUSG00000108621 | Gm37494 | 20 | ENSMUSG00000039672 | Kcne2     | 13 |
| ENSMUSG00000103907 | Gm37498 | 20 | ENSMUSG00000047330 | Kcne4     | 18 |
| ENSMUSG00000103901 | Gm37499 | 20 | ENSMUSG00000051726 | Kcnf1     | 18 |
| ENSMUSG00000103016 | Gm37506 | 18 | ENSMUSG00000074575 | Kcng1     | 18 |
| ENSMUSG00000102456 | Gm37508 | 20 | ENSMUSG00000059852 | Kcng2     | 5  |
| ENSMUSG00000104379 | Gm37509 | 20 | ENSMUSG00000045053 | Kcng3     | 9  |
| ENSMUSG00000104378 | Gm37510 | 12 | ENSMUSG00000045246 | Kcng4     | 18 |
| ENSMUSG00000104374 | Gm37517 | 5  | ENSMUSG00000058248 | Kcnh1     | 18 |
| ENSMUSG00000103251 | Gm37519 | 20 | ENSMUSG00000038319 | Kcnh2     | 18 |
| ENSMUSG00000103252 | Gm37521 | 1  | ENSMUSG00000037579 | Kcnh3     | 9  |
| ENSMUSG00000103783 | Gm37522 | 20 | ENSMUSG00000035355 | Kcnh4     | 9  |
| ENSMUSG00000103780 | Gm37524 | 16 | ENSMUSG00000034402 | Kcnh5     | 20 |
| ENSMUSG00000103784 | Gm37526 | 20 | ENSMUSG00000001901 | Kcnh6     | 20 |
| ENSMUSG00000103693 | Gm37529 | 20 | ENSMUSG00000059742 | Kcnh7     | 3  |
| ENSMUSG00000103696 | Gm37531 | 20 | ENSMUSG00000035580 | Kcnh8     | 20 |
| ENSMUSG00000103427 | Gm37534 | 20 | ENSMUSG00000053519 | Kcnip1    | 18 |
| ENSMUSG00000103422 | Gm37536 | 20 | ENSMUSG00000025221 | Kcnip2    | 3  |
| ENSMUSG00000103420 | Gm37537 | 20 | ENSMUSG00000079056 | Kcnip3    | 1  |
| ENSMUSG00000102293 | Gm37541 | 20 | ENSMUSG00000029088 | Kcnip4    | 18 |
| ENSMUSG00000102296 | Gm37543 | 20 | ENSMUSG00000044708 | Kcnj10    | 18 |
| ENSMUSG00000102940 | Gm37551 | 20 | ENSMUSG00000096146 | Kcnj11    | 20 |
| ENSMUSG00000104383 | Gm37553 | 20 | ENSMUSG00000042529 | Kcnj12    | 18 |
| ENSMUSG00000103094 | Gm37558 | 20 | ENSMUSG00000079436 | Kcnj13    | 13 |
| ENSMUSG00000103098 | Gm37559 | 20 | ENSMUSG00000058743 | Kcnj14    | 20 |
| ENSMUSG00000091639 | Gm3756  | 20 | ENSMUSG00000051497 | Kcnj16    | 9  |
| ENSMUSG00000104041 | Gm37562 | 20 | ENSMUSG00000041695 | Kcnj2     | 9  |
| ENSMUSG00000104044 | Gm37566 | 20 | ENSMUSG00000026824 | Kcnj3     | 19 |
| ENSMUSG00000102554 | Gm37568 | 20 | ENSMUSG00000044216 | Kcnj4     | 9  |
| ENSMUSG00000102556 | Gm37569 | 20 | ENSMUSG00000032034 | Kcnj5     | 17 |
| ENSMUSG00000102559 | Gm37570 | 20 | ENSMUSG00000043301 | Kcnj6     | 5  |
| ENSMUSG00000102397 | Gm37573 | 20 | ENSMUSG00000030247 | Kcnj8     | 20 |
| ENSMUSG00000102391 | Gm37578 | 20 | ENSMUSG00000038026 | Kcnj9     | 18 |
| ENSMUSG00000103388 | Gm37581 | 20 | ENSMUSG00000033998 | Kcnk1     | 4  |
| ENSMUSG00000103119 | Gm37583 | 20 | ENSMUSG00000033854 | Kcnk10    | 19 |
| ENSMUSG00000103115 | Gm37584 | 20 | ENSMUSG00000050138 | Kcnk12    | 19 |
| ENSMUSG00000104239 | Gm37588 | 20 | ENSMUSG00000045404 | Kcnk13    | 1  |
| ENSMUSG00000104235 | Gm37589 | 7  | ENSMUSG00000037624 | Kcnk2     | 9  |
| ENSMUSG00000103358 | Gm37593 | 9  | ENSMUSG00000049265 | Kcnk3     | 18 |
| ENSMUSG00000102749 | Gm37598 | 20 | ENSMUSG00000024957 | Kcnk4     | 18 |
| ENSMUSG00000102747 | Gm37602 | 2  | ENSMUSG00000023243 | Kcnk5     | 20 |
| ENSMUSG00000103851 | Gm37606 | 20 | ENSMUSG00000046410 | Kcnk6     | 20 |
| ENSMUSG00000103839 | Gm37607 | 20 | ENSMUSG00000036760 | Kcnk9     | 19 |
| ENSMUSG00000103831 | Gm37608 | 20 | ENSMUSG00000063142 | Kcnma1    | 19 |
| ENSMUSG00000103832 | Gm37611 | 20 | ENSMUSG00000020155 | Kcnmb1    | 20 |
| ENSMUSG00000103835 | Gm37612 | 20 | ENSMUSG00000037610 | Kcnmb2    | 16 |
| ENSMUSG00000103834 | Gm37613 | 20 | ENSMUSG00000054934 | Kcnmb4    | 20 |
| ENSMUSG00000102714 | Gm37618 | 20 | ENSMUSG00000085837 | Kcnmb4os2 | 20 |
| ENSMUSG00000103672 | Gm37621 | 3  | ENSMUSG0000002908  | Kcnn1     | 20 |

|                    |         |    |                    |          |    |
|--------------------|---------|----|--------------------|----------|----|
| ENSMUSG00000102782 | Gm37625 | 20 | ENSMUSG00000054477 | Kcnn2    | 9  |
| ENSMUSG00000102319 | Gm37626 | 20 | ENSMUSG00000000794 | Kcnn3    | 12 |
| ENSMUSG00000102317 | Gm37628 | 7  | ENSMUSG00000101609 | Kcnq1ot1 | 1  |
| ENSMUSG00000102316 | Gm37629 | 10 | ENSMUSG00000016346 | Kcnq2    | 9  |
| ENSMUSG00000104197 | Gm37632 | 20 | ENSMUSG00000056258 | Kcnq3    | 8  |
| ENSMUSG00000102868 | Gm37633 | 1  | ENSMUSG00000028631 | Kcnq4    | 20 |
| ENSMUSG00000102861 | Gm37637 | 20 | ENSMUSG00000028033 | Kcnq5    | 9  |
| ENSMUSG00000102863 | Gm37639 | 20 | ENSMUSG00000040164 | Kcns1    | 19 |
| ENSMUSG00000097156 | Gm3764  | 20 | ENSMUSG00000050963 | Kcns2    | 4  |
| ENSMUSG00000103197 | Gm37642 | 20 | ENSMUSG00000043673 | Kcns3    | 18 |
| ENSMUSG00000103194 | Gm37643 | 20 | ENSMUSG00000058740 | Kcnt1    | 1  |
| ENSMUSG00000103192 | Gm37645 | 20 | ENSMUSG00000052726 | Kcnt2    | 16 |
| ENSMUSG00000102257 | Gm37649 | 20 | ENSMUSG00000031576 | Kcnu1    | 20 |
| ENSMUSG00000103734 | Gm37651 | 20 | ENSMUSG00000022342 | Kcnv1    | 18 |
| ENSMUSG00000103738 | Gm37652 | 20 | ENSMUSG00000059022 | Kcp      | 20 |
| ENSMUSG00000103739 | Gm37653 | 20 | ENSMUSG00000036225 | Kctd1    | 9  |
| ENSMUSG00000104467 | Gm37660 | 20 | ENSMUSG00000001098 | Kctd10   | 20 |
| ENSMUSG00000104462 | Gm37661 | 10 | ENSMUSG00000046731 | Kctd11   | 20 |
| ENSMUSG00000104469 | Gm37663 | 2  | ENSMUSG00000098557 | Kctd12   | 1  |
| ENSMUSG00000103546 | Gm37666 | 20 | ENSMUSG00000041633 | Kctd12b  | 20 |
| ENSMUSG00000103540 | Gm37668 | 10 | ENSMUSG00000030685 | Kctd13   | 3  |
| ENSMUSG00000103543 | Gm37669 | 20 | ENSMUSG00000051727 | Kctd14   | 20 |
| ENSMUSG00000103548 | Gm37670 | 20 | ENSMUSG00000030499 | Kctd15   | 20 |
| ENSMUSG00000102625 | Gm37672 | 20 | ENSMUSG00000051401 | Kctd16   | 7  |
| ENSMUSG00000102623 | Gm37673 | 1  | ENSMUSG00000033287 | Kctd17   | 1  |
| ENSMUSG00000102621 | Gm37674 | 20 | ENSMUSG00000054770 | Kctd18   | 20 |
| ENSMUSG00000102620 | Gm37675 | 20 | ENSMUSG00000016940 | Kctd2    | 12 |
| ENSMUSG00000103976 | Gm37677 | 20 | ENSMUSG00000005936 | Kctd20   | 1  |
| ENSMUSG00000103970 | Gm37678 | 20 | ENSMUSG00000044952 | Kctd21   | 20 |
| ENSMUSG00000103025 | Gm37686 | 12 | ENSMUSG00000026608 | Kctd3    | 1  |
| ENSMUSG00000104347 | Gm37689 | 10 | ENSMUSG00000046523 | Kctd4    | 5  |
| ENSMUSG00000104348 | Gm37691 | 20 | ENSMUSG00000016946 | Kctd5    | 20 |
| ENSMUSG00000102562 | Gm37694 | 1  | ENSMUSG00000021752 | Kctd6    | 20 |
| ENSMUSG00000103473 | Gm37696 | 1  | ENSMUSG00000034110 | Kctd7    | 20 |
| ENSMUSG00000104170 | Gm37702 | 20 | ENSMUSG00000037653 | Kctd8    | 20 |
| ENSMUSG00000103646 | Gm37706 | 20 | ENSMUSG00000034327 | Kctd9    | 18 |
| ENSMUSG00000102796 | Gm37711 | 9  | ENSMUSG00000002778 | Kdelr1   | 20 |
| ENSMUSG00000102241 | Gm37716 | 20 | ENSMUSG00000079111 | Kdelr2   | 20 |
| ENSMUSG00000102240 | Gm37717 | 20 | ENSMUSG00000036940 | Kdm1a    | 20 |
| ENSMUSG00000102243 | Gm37718 | 20 | ENSMUSG00000038080 | Kdm1b    | 20 |
| ENSMUSG00000103959 | Gm37720 | 20 | ENSMUSG00000054611 | Kdm2a    | 20 |
| ENSMUSG00000102916 | Gm37725 | 4  | ENSMUSG00000029475 | Kdm2b    | 1  |
| ENSMUSG00000102919 | Gm37726 | 20 | ENSMUSG00000053470 | Kdm3a    | 9  |
| ENSMUSG00000103220 | Gm37728 | 20 | ENSMUSG00000038773 | Kdm3b    | 20 |
| ENSMUSG00000103225 | Gm37731 | 1  | ENSMUSG00000033326 | Kdm4a    | 20 |
| ENSMUSG00000103227 | Gm37733 | 20 | ENSMUSG00000024201 | Kdm4b    | 9  |
| ENSMUSG00000104508 | Gm37735 | 20 | ENSMUSG00000028397 | Kdm4c    | 20 |
| ENSMUSG00000104501 | Gm37736 | 20 | ENSMUSG00000053914 | Kdm4d    | 1  |
| ENSMUSG00000104503 | Gm37738 | 20 | ENSMUSG00000030180 | Kdm5a    | 7  |
| ENSMUSG00000103146 | Gm37745 | 20 | ENSMUSG00000042207 | Kdm5b    | 18 |
| ENSMUSG00000104262 | Gm37747 | 20 | ENSMUSG00000025332 | Kdm5c    | 20 |
| ENSMUSG00000104266 | Gm37748 | 20 | ENSMUSG00000056673 | Kdm5d    | 19 |
| ENSMUSG00000103384 | Gm37753 | 20 | ENSMUSG00000037369 | Kdm6a    | 19 |
| ENSMUSG00000103382 | Gm37755 | 20 | ENSMUSG00000018476 | Kdm6b    | 8  |
| ENSMUSG00000102719 | Gm37760 | 20 | ENSMUSG00000042599 | Kdm7a    | 9  |

|                    |         |    |                    |           |    |
|--------------------|---------|----|--------------------|-----------|----|
| ENSMUSG00000102994 | Gm37767 | 20 | ENSMUSG00000030752 | Kdm8      | 20 |
| ENSMUSG00000103642 | Gm37769 | 20 | ENSMUSG00000062960 | Kdr       | 20 |
| ENSMUSG00000104039 | Gm37772 | 18 | ENSMUSG00000009905 | Kdsr      | 20 |
| ENSMUSG00000104033 | Gm37773 | 4  | ENSMUSG00000003308 | Keap1     | 20 |
| ENSMUSG00000104037 | Gm37776 | 20 | ENSMUSG00000028060 | Khdc4     | 20 |
| ENSMUSG00000102698 | Gm37777 | 2  | ENSMUSG00000028790 | Khdrbs1   | 20 |
| ENSMUSG00000102691 | Gm37780 | 20 | ENSMUSG00000026058 | Khdrbs2   | 1  |
| ENSMUSG00000102521 | Gm37781 | 9  | ENSMUSG00000022332 | Khdrbs3   | 5  |
| ENSMUSG00000102523 | Gm37783 | 20 | ENSMUSG00000029162 | Khk       | 20 |
| ENSMUSG00000102526 | Gm37785 | 20 | ENSMUSG00000047153 | Khbyn     | 1  |
| ENSMUSG00000102632 | Gm37786 | 20 | ENSMUSG00000007670 | Khsrp     | 9  |
| ENSMUSG00000102326 | Gm37788 | 20 | ENSMUSG00000036333 | Kidins220 | 7  |
| ENSMUSG00000102323 | Gm37790 | 1  | ENSMUSG00000021375 | Kif13a    | 16 |
| ENSMUSG00000102321 | Gm37792 | 20 | ENSMUSG00000060012 | Kif13b    | 16 |
| ENSMUSG00000102813 | Gm37795 | 18 | ENSMUSG00000036768 | Kif15     | 20 |
| ENSMUSG00000103303 | Gm37802 | 20 | ENSMUSG00000038844 | Kif16b    | 20 |
| ENSMUSG00000103755 | Gm37805 | 20 | ENSMUSG00000028758 | Kif17     | 9  |
| ENSMUSG00000103846 | Gm37809 | 20 | ENSMUSG00000027115 | Kif18a    | 20 |
| ENSMUSG00000102900 | Gm37811 | 20 | ENSMUSG00000010021 | Kif19a    | 20 |
| ENSMUSG00000102816 | Gm37814 | 3  | ENSMUSG00000014602 | Kif1a     | 18 |
| ENSMUSG00000104184 | Gm37818 | 3  | ENSMUSG00000063077 | Kif1b     | 3  |
| ENSMUSG00000104459 | Gm37824 | 20 | ENSMUSG00000036955 | Kif1bp    | 1  |
| ENSMUSG00000104454 | Gm37827 | 20 | ENSMUSG00000020821 | Kif1c     | 16 |
| ENSMUSG00000103539 | Gm37834 | 12 | ENSMUSG00000003779 | Kif20a    | 20 |
| ENSMUSG00000103536 | Gm37837 | 9  | ENSMUSG00000024795 | Kif20b    | 20 |
| ENSMUSG00000102615 | Gm37844 | 20 | ENSMUSG00000022629 | Kif21a    | 19 |
| ENSMUSG00000102618 | Gm37848 | 20 | ENSMUSG00000041642 | Kif21b    | 6  |
| ENSMUSG00000102619 | Gm37849 | 12 | ENSMUSG00000030677 | Kif22     | 20 |
| ENSMUSG00000103761 | Gm37859 | 9  | ENSMUSG00000032254 | Kif23     | 20 |
| ENSMUSG00000103763 | Gm37860 | 20 | ENSMUSG00000028438 | Kif24     | 20 |
| ENSMUSG00000103762 | Gm37861 | 3  | ENSMUSG00000021294 | Kif26a    | 9  |
| ENSMUSG00000102407 | Gm37862 | 7  | ENSMUSG00000026494 | Kif26b    | 1  |
| ENSMUSG00000102401 | Gm37864 | 20 | ENSMUSG00000060176 | Kif27     | 3  |
| ENSMUSG00000102179 | Gm37868 | 20 | ENSMUSG00000021693 | Kif2a     | 9  |
| ENSMUSG00000102172 | Gm37873 | 20 | ENSMUSG00000018395 | Kif3a     | 5  |
| ENSMUSG00000104104 | Gm37877 | 20 | ENSMUSG00000027475 | Kif3b     | 20 |
| ENSMUSG00000104107 | Gm37879 | 20 | ENSMUSG00000020668 | Kif3c     | 18 |
| ENSMUSG00000094392 | Gm3788  | 20 | ENSMUSG00000034311 | Kif4      | 20 |
| ENSMUSG00000104100 | Gm37880 | 16 | ENSMUSG00000074657 | Kif5a     | 16 |
| ENSMUSG00000102945 | Gm37884 | 20 | ENSMUSG00000006740 | Kif5b     | 16 |
| ENSMUSG00000102234 | Gm37885 | 1  | ENSMUSG00000026764 | Kif5c     | 1  |
| ENSMUSG00000104271 | Gm37891 | 8  | ENSMUSG00000023999 | Kif6      | 20 |
| ENSMUSG00000103928 | Gm37893 | 20 | ENSMUSG00000050382 | Kif7      | 20 |
| ENSMUSG00000103926 | Gm37894 | 20 | ENSMUSG00000032489 | Kif9      | 13 |
| ENSMUSG00000103924 | Gm37895 | 20 | ENSMUSG00000026585 | Kifap3    | 20 |
| ENSMUSG00000103923 | Gm37896 | 20 | ENSMUSG00000079553 | Kifc1     | 20 |
| ENSMUSG00000103920 | Gm37897 | 20 | ENSMUSG00000004187 | Kifc2     | 20 |
| ENSMUSG00000103000 | Gm37900 | 20 | ENSMUSG00000031788 | Kifc3     | 18 |
| ENSMUSG00000103076 | Gm37902 | 20 | ENSMUSG00000024301 | Kifc5b    | 20 |
| ENSMUSG00000104315 | Gm37906 | 20 | ENSMUSG00000037262 | Kin       | 20 |
| ENSMUSG00000104316 | Gm37909 | 13 | ENSMUSG00000041734 | Kirrel    | 9  |
| ENSMUSG00000113423 | Gm3791  | 20 | ENSMUSG00000036915 | Kirrel2   | 20 |
| ENSMUSG00000104313 | Gm37911 | 20 | ENSMUSG00000032036 | Kirrel3   | 9  |
| ENSMUSG00000103272 | Gm37914 | 20 | ENSMUSG00000053889 | Kirrel3os | 20 |
| ENSMUSG00000102481 | Gm37925 | 9  | ENSMUSG00000035773 | Kiss1r    | 20 |

|                    |         |    |                    |         |    |
|--------------------|---------|----|--------------------|---------|----|
| ENSMUSG00000104362 | Gm37928 | 4  | ENSMUSG00000005672 | Kit     | 18 |
| ENSMUSG00000108260 | Gm3793  | 20 | ENSMUSG00000019966 | Kitl    | 18 |
| ENSMUSG00000103403 | Gm37931 | 20 | ENSMUSG00000074749 | Kiz     | 20 |
| ENSMUSG00000103408 | Gm37933 | 20 | ENSMUSG00000058488 | Kl      | 13 |
| ENSMUSG00000102723 | Gm37936 | 20 | ENSMUSG00000021288 | Klc1    | 12 |
| ENSMUSG00000103899 | Gm37940 | 2  | ENSMUSG00000024862 | Klc2    | 18 |
| ENSMUSG00000103891 | Gm37941 | 20 | ENSMUSG00000040714 | Klc3    | 9  |
| ENSMUSG00000102960 | Gm37943 | 19 | ENSMUSG00000003546 | Klc4    | 20 |
| ENSMUSG00000102963 | Gm37945 | 20 | ENSMUSG00000037465 | Klf10   | 2  |
| ENSMUSG00000103614 | Gm37949 | 20 | ENSMUSG00000020653 | Klf11   | 20 |
| ENSMUSG00000104061 | Gm37953 | 20 | ENSMUSG00000072294 | Klf12   | 19 |
| ENSMUSG00000104060 | Gm37954 | 20 | ENSMUSG00000052040 | Klf13   | 2  |
| ENSMUSG00000104066 | Gm37955 | 20 | ENSMUSG00000073209 | Klf14   | 20 |
| ENSMUSG00000104064 | Gm37956 | 20 | ENSMUSG00000030087 | Klf15   | 20 |
| ENSMUSG00000104396 | Gm37959 | 9  | ENSMUSG00000035397 | Klf16   | 9  |
| ENSMUSG00000104391 | Gm37960 | 20 | ENSMUSG00000055148 | Klf2    | 20 |
| ENSMUSG00000104392 | Gm37962 | 3  | ENSMUSG00000029178 | Klf3    | 3  |
| ENSMUSG00000104399 | Gm37963 | 1  | ENSMUSG00000003032 | Klf4    | 20 |
| ENSMUSG00000104398 | Gm37964 | 7  | ENSMUSG00000005148 | Klf5    | 20 |
| ENSMUSG00000102579 | Gm37965 | 20 | ENSMUSG00000000078 | Klf6    | 3  |
| ENSMUSG00000102571 | Gm37967 | 20 | ENSMUSG00000025959 | Klf7    | 3  |
| ENSMUSG00000102570 | Gm37968 | 1  | ENSMUSG00000041649 | Klf8    | 12 |
| ENSMUSG00000102577 | Gm37969 | 20 | ENSMUSG00000033863 | Klf9    | 9  |
| ENSMUSG00000102370 | Gm37973 | 20 | ENSMUSG00000051890 | Klhdc1  | 20 |
| ENSMUSG00000102376 | Gm37975 | 20 | ENSMUSG00000029775 | Klhdc10 | 9  |
| ENSMUSG00000103132 | Gm37978 | 20 | ENSMUSG00000020978 | Klhdc2  | 9  |
| ENSMUSG00000103135 | Gm37979 | 20 | ENSMUSG00000063576 | Klhdc3  | 19 |
| ENSMUSG00000103136 | Gm37980 | 20 | ENSMUSG00000040263 | Klhdc4  | 20 |
| ENSMUSG00000102225 | Gm37983 | 20 | ENSMUSG00000078234 | Klhdc7a | 20 |
| ENSMUSG00000104210 | Gm37984 | 1  | ENSMUSG00000091680 | Klhdc7b | 18 |
| ENSMUSG00000104211 | Gm37985 | 20 | ENSMUSG00000042115 | Klhdc8a | 18 |
| ENSMUSG00000103331 | Gm37995 | 9  | ENSMUSG00000032609 | Klhdc8b | 20 |
| ENSMUSG00000103482 | Gm37999 | 1  | ENSMUSG00000045259 | Klhdc9  | 20 |
| ENSMUSG00000114194 | Gm3800  | 20 | ENSMUSG00000022076 | Klh1    | 20 |
| ENSMUSG00000103819 | Gm38008 | 20 | ENSMUSG00000048732 | Klh11   | 3  |
| ENSMUSG00000103818 | Gm38009 | 20 | ENSMUSG00000026455 | Klh12   | 1  |
| ENSMUSG00000104400 | Gm38010 | 20 | ENSMUSG00000036782 | Klh13   | 6  |
| ENSMUSG00000104406 | Gm38014 | 20 | ENSMUSG00000042514 | Klh14   | 1  |
| ENSMUSG00000103697 | Gm38020 | 19 | ENSMUSG00000043929 | Klh15   | 20 |
| ENSMUSG00000102649 | Gm38021 | 20 | ENSMUSG00000054792 | Klh18   | 19 |
| ENSMUSG00000102647 | Gm38024 | 20 | ENSMUSG00000031605 | Klh2    | 9  |
| ENSMUSG00000103992 | Gm38029 | 20 | ENSMUSG00000026705 | Klh20   | 3  |
| ENSMUSG00000103991 | Gm38031 | 20 | ENSMUSG00000073700 | Klh21   | 20 |
| ENSMUSG00000102441 | Gm38032 | 20 | ENSMUSG00000022750 | Klh22   | 20 |
| ENSMUSG00000102844 | Gm38034 | 9  | ENSMUSG00000042155 | Klh23   | 20 |
| ENSMUSG00000102841 | Gm38036 | 20 | ENSMUSG00000062901 | Klh24   | 20 |
| ENSMUSG00000104292 | Gm38042 | 3  | ENSMUSG00000055652 | Klh25   | 12 |
| ENSMUSG00000104293 | Gm38043 | 20 | ENSMUSG00000055707 | Klh26   | 20 |
| ENSMUSG00000102436 | Gm38047 | 20 | ENSMUSG00000020948 | Klh28   | 3  |
| ENSMUSG00000102147 | Gm38055 | 20 | ENSMUSG00000020627 | Klh29   | 18 |
| ENSMUSG00000102145 | Gm38056 | 16 | ENSMUSG00000014164 | Klh3    | 9  |
| ENSMUSG00000102143 | Gm38057 | 20 | ENSMUSG00000040387 | Klh32   | 9  |
| ENSMUSG00000102140 | Gm38058 | 6  | ENSMUSG00000090799 | Klh33   | 20 |
| ENSMUSG00000102148 | Gm38059 | 20 | ENSMUSG00000047485 | Klh34   | 20 |
| ENSMUSG00000104488 | Gm38062 | 20 | ENSMUSG00000035298 | Klh35   | 20 |

|                    |         |    |                    |            |    |
|--------------------|---------|----|--------------------|------------|----|
| ENSMUSG00000103569 | Gm38067 | 20 | ENSMUSG00000031828 | Klh136     | 20 |
| ENSMUSG00000103561 | Gm38069 | 20 | ENSMUSG00000025597 | Klh14      | 16 |
| ENSMUSG00000103560 | Gm38070 | 20 | ENSMUSG00000074001 | Klh140     | 20 |
| ENSMUSG00000103916 | Gm38071 | 10 | ENSMUSG00000075307 | Klh141     | 20 |
| ENSMUSG00000103914 | Gm38073 | 20 | ENSMUSG00000040102 | Klh142     | 12 |
| ENSMUSG00000103002 | Gm38075 | 20 | ENSMUSG00000054920 | Klh15      | 20 |
| ENSMUSG00000104344 | Gm38077 | 1  | ENSMUSG00000043008 | Klh16      | 10 |
| ENSMUSG00000104363 | Gm38081 | 20 | ENSMUSG00000028986 | Klh17      | 18 |
| ENSMUSG00000104369 | Gm38082 | 20 | ENSMUSG00000029312 | Klh18      | 20 |
| ENSMUSG00000103354 | Gm38083 | 20 | ENSMUSG00000070923 | Klh19      | 6  |
| ENSMUSG00000102517 | Gm38085 | 3  | ENSMUSG00000050063 | Klk6       | 20 |
| ENSMUSG00000097935 | Gm3809  | 20 | ENSMUSG00000064023 | Klk8       | 1  |
| ENSMUSG00000104157 | Gm38101 | 1  | ENSMUSG00000030187 | Klra2      | 9  |
| ENSMUSG00000104155 | Gm38103 | 20 | ENSMUSG00000071537 | Klrg2      | 20 |
| ENSMUSG00000104154 | Gm38104 | 20 | ENSMUSG00000002028 | Kmt2a      | 20 |
| ENSMUSG00000104153 | Gm38105 | 9  | ENSMUSG00000006307 | Kmt2b      | 20 |
| ENSMUSG00000103075 | Gm38109 | 20 | ENSMUSG00000038056 | Kmt2c      | 2  |
| ENSMUSG00000102939 | Gm38111 | 20 | ENSMUSG00000048154 | Kmt2d      | 20 |
| ENSMUSG00000102930 | Gm38115 | 20 | ENSMUSG00000029004 | Kmt2e      | 20 |
| ENSMUSG00000102937 | Gm38116 | 20 | ENSMUSG00000049327 | Kmt5a      | 20 |
| ENSMUSG00000103085 | Gm38120 | 1  | ENSMUSG00000045098 | Kmt5b      | 2  |
| ENSMUSG00000103082 | Gm38124 | 20 | ENSMUSG00000059851 | Kmt5c      | 20 |
| ENSMUSG00000104052 | Gm38125 | 20 | ENSMUSG00000066129 | Kndc1      | 18 |
| ENSMUSG00000102383 | Gm38142 | 20 | ENSMUSG00000027326 | Kn1        | 20 |
| ENSMUSG00000103163 | Gm38146 | 20 | ENSMUSG00000030980 | Knop1      | 20 |
| ENSMUSG00000103162 | Gm38147 | 20 | ENSMUSG00000027331 | Knstrn     | 20 |
| ENSMUSG00000103161 | Gm38148 | 20 | ENSMUSG00000029414 | Kntc1      | 20 |
| ENSMUSG00000118088 | Gm3815  | 20 | ENSMUSG00000022905 | Kpna1      | 2  |
| ENSMUSG00000103360 | Gm38156 | 20 | ENSMUSG00000018362 | Kpna2      | 20 |
| ENSMUSG00000103364 | Gm38157 | 20 | ENSMUSG00000021929 | Kpna3      | 4  |
| ENSMUSG00000103367 | Gm38158 | 12 | ENSMUSG00000027782 | Kpna4      | 13 |
| ENSMUSG00000102776 | Gm38162 | 3  | ENSMUSG00000003731 | Kpna6      | 2  |
| ENSMUSG00000102770 | Gm38163 | 20 | ENSMUSG00000038770 | Kpna7      | 20 |
| ENSMUSG00000102192 | Gm38167 | 20 | ENSMUSG00000001440 | Kpnb1      | 12 |
| ENSMUSG00000102194 | Gm38169 | 20 | ENSMUSG00000006021 | Kptn       | 9  |
| ENSMUSG00000103824 | Gm38177 | 20 | ENSMUSG00000030265 | Kras       | 3  |
| ENSMUSG00000103825 | Gm38178 | 20 | ENSMUSG00000042810 | Krba1      | 20 |
| ENSMUSG00000102403 | Gm38187 | 20 | ENSMUSG00000053012 | Krcc1      | 20 |
| ENSMUSG00000102302 | Gm38190 | 12 | ENSMUSG00000020393 | Kremen1    | 9  |
| ENSMUSG00000102305 | Gm38192 | 20 | ENSMUSG00000040680 | Kremen2    | 20 |
| ENSMUSG00000102460 | Gm38197 | 20 | ENSMUSG00000035047 | Kri1       | 20 |
| ENSMUSG00000102465 | Gm38198 | 7  | ENSMUSG00000000600 | Krit1      | 1  |
| ENSMUSG00000102466 | Gm38200 | 20 | ENSMUSG00000063334 | Krr1       | 20 |
| ENSMUSG00000103967 | Gm38214 | 20 | ENSMUSG00000046834 | Krt1       | 20 |
| ENSMUSG00000103552 | Gm38217 | 20 | ENSMUSG00000019761 | Krt10      | 9  |
| ENSMUSG00000103558 | Gm38220 | 5  | ENSMUSG00000020912 | Krt12      | 20 |
| ENSMUSG00000102639 | Gm38223 | 9  | ENSMUSG00000023043 | Krt18      | 13 |
| ENSMUSG00000102633 | Gm38224 | 20 | ENSMUSG00000035849 | Krt222     | 6  |
| ENSMUSG00000102634 | Gm38225 | 20 | ENSMUSG00000075570 | Krt26      | 20 |
| ENSMUSG00000103945 | Gm38228 | 20 | ENSMUSG00000067594 | Krt77      | 3  |
| ENSMUSG00000102259 | Gm38230 | 20 | ENSMUSG00000049382 | Krt8       | 13 |
| ENSMUSG00000103291 | Gm38235 | 12 | ENSMUSG00000051617 | Krt9       | 9  |
| ENSMUSG00000103747 | Gm38236 | 20 | ENSMUSG00000112223 | Krtap10-10 | 20 |
| ENSMUSG00000103742 | Gm38240 | 9  | ENSMUSG00000069583 | Krtap12-1  | 20 |
| ENSMUSG00000103741 | Gm38241 | 12 | ENSMUSG00000042747 | Krtcap2    | 20 |

|                    |         |    |                    |         |    |
|--------------------|---------|----|--------------------|---------|----|
| ENSMUSG00000103748 | Gm38243 | 9  | ENSMUSG00000029149 | Krtcap3 | 20 |
| ENSMUSG00000103467 | Gm38245 | 20 | ENSMUSG00000018334 | Ksr1    | 5  |
| ENSMUSG00000104164 | Gm38248 | 20 | ENSMUSG00000061578 | Ksr2    | 20 |
| ENSMUSG00000104168 | Gm38250 | 20 | ENSMUSG00000073775 | Kti12   | 20 |
| ENSMUSG00000102786 | Gm38252 | 9  | ENSMUSG00000021843 | Ktn1    | 20 |
| ENSMUSG00000102780 | Gm38253 | 20 | ENSMUSG00000055553 | Kxd1    | 20 |
| ENSMUSG00000102783 | Gm38254 | 1  | ENSMUSG00000035606 | Ky      | 20 |
| ENSMUSG00000102788 | Gm38255 | 1  | ENSMUSG00000039648 | Kyat1   | 20 |
| ENSMUSG00000102258 | Gm38257 | 5  | ENSMUSG00000040213 | Kyat3   | 1  |
| ENSMUSG00000102253 | Gm38259 | 20 | ENSMUSG00000031391 | L1cam   | 18 |
| ENSMUSG00000102250 | Gm38260 | 7  | ENSMUSG00000020988 | L2hgdh  | 18 |
| ENSMUSG00000102733 | Gm38262 | 20 | ENSMUSG00000019718 | L3hypdh | 20 |
| ENSMUSG00000102902 | Gm38263 | 9  | ENSMUSG00000035576 | L3mbtl1 | 11 |
| ENSMUSG00000103050 | Gm38273 | 20 | ENSMUSG00000022394 | L3mbtl2 | 20 |
| ENSMUSG00000083808 | Gm3828  | 20 | ENSMUSG00000039089 | L3mbtl3 | 9  |
| ENSMUSG00000103214 | Gm38286 | 9  | ENSMUSG00000041565 | L3mbtl4 | 20 |
| ENSMUSG00000103151 | Gm38292 | 20 | ENSMUSG00000044350 | Lacc1   | 20 |
| ENSMUSG00000104272 | Gm38297 | 20 | ENSMUSG00000032370 | Lactb   | 20 |
| ENSMUSG00000104277 | Gm38299 | 20 | ENSMUSG00000025937 | Lactb2  | 1  |
| ENSMUSG00000103390 | Gm38301 | 20 | ENSMUSG00000070683 | Lactbl1 | 20 |
| ENSMUSG00000103391 | Gm38302 | 20 | ENSMUSG00000041782 | Lad1    | 20 |
| ENSMUSG00000102709 | Gm38308 | 19 | ENSMUSG00000030124 | Lag3    | 20 |
| ENSMUSG00000103732 | Gm38315 | 20 | ENSMUSG00000015289 | Lage3   | 20 |
| ENSMUSG00000103735 | Gm38317 | 20 | ENSMUSG00000055541 | Lair1   | 9  |
| ENSMUSG00000102989 | Gm38318 | 20 | ENSMUSG00000032796 | Lama1   | 20 |
| ENSMUSG00000102982 | Gm38319 | 20 | ENSMUSG00000019899 | Lama2   | 2  |
| ENSMUSG00000103632 | Gm38329 | 20 | ENSMUSG00000024421 | Lama3   | 20 |
| ENSMUSG00000103636 | Gm38331 | 9  | ENSMUSG00000019846 | Lama4   | 20 |
| ENSMUSG00000104002 | Gm38336 | 20 | ENSMUSG00000015647 | Lama5   | 13 |
| ENSMUSG00000102516 | Gm38340 | 20 | ENSMUSG00000002900 | Lamb1   | 20 |
| ENSMUSG00000102452 | Gm38344 | 20 | ENSMUSG00000052911 | Lamb2   | 13 |
| ENSMUSG00000102352 | Gm38346 | 20 | ENSMUSG00000026639 | Lamb3   | 20 |
| ENSMUSG00000102357 | Gm38348 | 3  | ENSMUSG00000026478 | Lamc1   | 7  |
| ENSMUSG00000102459 | Gm38352 | 20 | ENSMUSG00000026479 | Lamc2   | 1  |
| ENSMUSG00000102820 | Gm38353 | 1  | ENSMUSG00000026840 | Lamc3   | 20 |
| ENSMUSG00000102935 | Gm38355 | 20 | ENSMUSG00000031447 | Lamp1   | 16 |
| ENSMUSG00000103313 | Gm38357 | 20 | ENSMUSG00000016534 | Lamp2   | 20 |
| ENSMUSG00000103317 | Gm38359 | 20 | ENSMUSG00000027270 | Lamp5   | 18 |
| ENSMUSG00000103591 | Gm38365 | 20 | ENSMUSG00000030842 | Lamtor1 | 20 |
| ENSMUSG00000103621 | Gm38366 | 20 | ENSMUSG00000028062 | Lamtor2 | 20 |
| ENSMUSG00000103509 | Gm38372 | 20 | ENSMUSG00000091512 | Lamtor3 | 20 |
| ENSMUSG00000103505 | Gm38374 | 2  | ENSMUSG00000050552 | Lamtor4 | 20 |
| ENSMUSG00000103507 | Gm38375 | 20 | ENSMUSG00000087260 | Lamtor5 | 12 |
| ENSMUSG00000103506 | Gm38376 | 20 | ENSMUSG00000026000 | Lancl1  | 19 |
| ENSMUSG00000102662 | Gm38377 | 20 | ENSMUSG00000062190 | Lancl2  | 3  |
| ENSMUSG00000102664 | Gm38380 | 20 | ENSMUSG00000047344 | Lancl3  | 18 |
| ENSMUSG00000102594 | Gm38381 | 20 | ENSMUSG00000039682 | Lap3    | 16 |
| ENSMUSG00000102374 | Gm38387 | 9  | ENSMUSG00000020585 | Laptm4a | 20 |
| ENSMUSG00000103413 | Gm38389 | 9  | ENSMUSG00000022257 | Laptm4b | 9  |
| ENSMUSG00000103622 | Gm38391 | 20 | ENSMUSG00000028581 | Laptm5  | 20 |
| ENSMUSG00000000948 | Gm38393 | 3  | ENSMUSG00000004383 | Large1  | 5  |
| ENSMUSG00000094410 | Gm38394 | 20 | ENSMUSG00000040434 | Large2  | 13 |
| ENSMUSG00000105218 | Gm38413 | 9  | ENSMUSG00000037331 | Larp1   | 9  |
| ENSMUSG00000108917 | Gm38451 | 3  | ENSMUSG00000025762 | Larp1b  | 3  |
| ENSMUSG00000109398 | Gm3854  | 20 | ENSMUSG00000023025 | Larp4   | 12 |



|                    |         |    |                     |          |    |
|--------------------|---------|----|---------------------|----------|----|
| ENSMUSG00000105489 | Gm38562 | 20 | ENSMUSG00000033499  | Larp4b   | 12 |
| ENSMUSG00000111752 | Gm38575 | 20 | ENSMUSG00000034839  | Larp6    | 20 |
| ENSMUSG00000118075 | Gm38576 | 20 | ENSMUSG00000027968  | Larp7    | 4  |
| ENSMUSG00000114401 | Gm38604 | 20 | ENSMUSG00000024493  | Lars     | 1  |
| ENSMUSG00000111219 | Gm38642 | 20 | ENSMUSG00000035202  | Lars2    | 20 |
| ENSMUSG00000111360 | Gm38642 | 20 | ENSMUSG00000057421  | Las1l    | 20 |
| ENSMUSG00000108010 | Gm38708 | 20 | ENSMUSG00000038366  | Lasp1    | 19 |
| ENSMUSG00000116093 | Gm3888  | 12 | ENSMUSG00000030742  | Lat      | 20 |
| ENSMUSG00000107728 | Gm38910 | 20 | ENSMUSG00000040751  | Lat2     | 10 |
| ENSMUSG00000109549 | Gm38941 | 9  | ENSMUSG00000021959  | Lats2    | 20 |
| ENSMUSG00000109080 | Gm38944 | 20 | ENSMUSG00000060594  | Layn     | 20 |
| ENSMUSG00000108390 | Gm39038 | 20 | ENSMUSG00000024063  | Lbh      | 18 |
| ENSMUSG00000108460 | Gm39041 | 2  | ENSMUSG00000096740  | Lbhd1    | 3  |
| ENSMUSG00000109450 | Gm39043 | 9  | ENSMUSG00000016024  | Lbp      | 13 |
| ENSMUSG00000108801 | Gm39090 | 20 | ENSMUSG00000004880  | Lbr      | 19 |
| ENSMUSG00000109277 | Gm39121 | 20 | ENSMUSG00000025216  | Lbx1     | 1  |
| ENSMUSG00000109868 | Gm39244 | 1  | ENSMUSG00000032258  | Lca5     | 1  |
| ENSMUSG00000111229 | Gm39323 | 20 | ENSMUSG00000045275  | Lca5l    | 13 |
| ENSMUSG00000110773 | Gm39326 | 1  | ENSMUSG00000035237  | Lcat     | 18 |
| ENSMUSG00000110760 | Gm39456 | 3  | ENSMUSG00000000409  | Lck      | 12 |
| ENSMUSG00000111873 | Gm39463 | 20 | ENSMUSG00000054469  | Lclat1   | 20 |
| ENSMUSG00000113845 | Gm39473 | 20 | ENSMUSG00000030763  | Lcmt1    | 9  |
| ENSMUSG00000109459 | Gm39526 | 20 | ENSMUSG00000074890  | Lcmt2    | 20 |
| ENSMUSG00000105003 | Gm40055 | 9  | ENSMUSG00000026822  | Lcn2     | 20 |
| ENSMUSG00000105355 | Gm40117 | 20 | ENSMUSG00000025019  | Lcor     | 2  |
| ENSMUSG00000117662 | Gm4013  | 20 | ENSMUSG00000015882  | Lcorl    | 20 |
| ENSMUSG00000101059 | Gm4017  | 20 | ENSMUSG00000021998  | Lcp1     | 20 |
| ENSMUSG00000107362 | Gm40309 | 20 | ENSMUSG00000002699  | Lcp2     | 20 |
| ENSMUSG00000104873 | Gm40332 | 20 | ENSMUSG00000032401  | Lctl     | 20 |
| ENSMUSG00000110649 | Gm40466 | 20 | ENSMUSG00000037669  | Ldah     | 20 |
| ENSMUSG00000110236 | Gm40493 | 20 | ENSMUSG00000025223  | Ldb1     | 3  |
| ENSMUSG00000110924 | Gm40518 | 20 | ENSMUSG00000039706  | Ldb2     | 20 |
| ENSMUSG00000113362 | Gm40557 | 20 | ENSMUSG00000021798  | Ldb3     | 16 |
| ENSMUSG00000113029 | Gm40578 | 20 | ENSMUSG00000063229  | Ldha     | 18 |
| ENSMUSG00000112352 | Gm40617 | 20 | ENSMUSG00000083836  | Ldha-ps2 | 1  |
| ENSMUSG00000114017 | Gm40662 | 20 | ENSMUSG000000101959 | Ldhal6b  | 20 |
| ENSMUSG00000113241 | Gm40663 | 1  | ENSMUSG00000030246  | Ldhb     | 2  |
| ENSMUSG00000096449 | Gm4076  | 16 | ENSMUSG00000031958  | Ldhd     | 18 |
| ENSMUSG00000113216 | Gm40841 | 9  | ENSMUSG00000032193  | Ldlr     | 9  |
| ENSMUSG00000118002 | Gm4107  | 20 | ENSMUSG00000048058  | Ldlrad3  | 18 |
| ENSMUSG00000114369 | Gm41077 | 20 | ENSMUSG00000024544  | Ldlrad4  | 9  |
| ENSMUSG00000114815 | Gm41118 | 20 | ENSMUSG00000037295  | Ldlrap1  | 15 |
| ENSMUSG00000089940 | Gm4117  | 13 | ENSMUSG00000057615  | Ldoc1    | 20 |
| ENSMUSG00000114902 | Gm4118  | 20 | ENSMUSG00000027985  | Lef1     | 18 |
| ENSMUSG00000114833 | Gm41192 | 20 | ENSMUSG00000106086  | Lef1os1  | 18 |
| ENSMUSG00000115580 | Gm41230 | 20 | ENSMUSG00000074579  | Lekr1    | 20 |
| ENSMUSG00000114579 | Gm4130  | 20 | ENSMUSG00000079330  | Lemd1    | 20 |
| ENSMUSG00000116288 | Gm41349 | 20 | ENSMUSG00000044857  | Lemd2    | 20 |
| ENSMUSG00000116125 | Gm41361 | 20 | ENSMUSG00000048661  | Lemd3    | 20 |
| ENSMUSG00000116223 | Gm41396 | 20 | ENSMUSG00000078813  | Leng1    | 20 |
| ENSMUSG00000116029 | Gm41414 | 18 | ENSMUSG00000035545  | Leng8    | 20 |
| ENSMUSG00000074800 | Gm4149  | 12 | ENSMUSG00000043432  | Leng9    | 20 |
| ENSMUSG00000116763 | Gm41492 | 20 | ENSMUSG00000042487  | Leo1     | 20 |
| ENSMUSG00000117007 | Gm41556 | 20 | ENSMUSG00000057722  | Lepr     | 13 |
| ENSMUSG00000117548 | Gm41662 | 12 | ENSMUSG00000035212  | Leprot   | 20 |

|                    |         |    |                    |          |    |
|--------------------|---------|----|--------------------|----------|----|
| ENSMUSG00000117519 | Gm41664 | 20 | ENSMUSG00000031513 | Leprot1  | 3  |
| ENSMUSG00000117992 | Gm41760 | 1  | ENSMUSG00000005299 | Letm1    | 20 |
| ENSMUSG00000117526 | Gm41780 | 20 | ENSMUSG00000037363 | Letm2    | 20 |
| ENSMUSG00000118280 | Gm41804 | 20 | ENSMUSG00000037353 | Letmd1   | 13 |
| ENSMUSG00000092384 | Gm4189  | 20 | ENSMUSG00000029570 | Lfng     | 20 |
| ENSMUSG00000091421 | Gm4202  | 20 | ENSMUSG00000068220 | Lgals1   | 13 |
| ENSMUSG00000079139 | Gm4204  | 18 | ENSMUSG00000050335 | Lgals3   | 20 |
| ENSMUSG00000110631 | Gm42047 | 20 | ENSMUSG00000033880 | Lgals3bp | 20 |
| ENSMUSG00000110156 | Gm42067 | 20 | ENSMUSG00000053964 | Lgals4   | 20 |
| ENSMUSG00000097146 | Gm4211  | 18 | ENSMUSG00000057554 | Lgals8   | 20 |
| ENSMUSG00000097954 | Gm4217  | 20 | ENSMUSG00000001123 | Lgals9   | 20 |
| ENSMUSG00000091378 | Gm4219  | 20 | ENSMUSG00000042363 | Lgalsl   | 20 |
| ENSMUSG00000096948 | Gm4221  | 1  | ENSMUSG00000067242 | Lgi1     | 4  |
| ENSMUSG00000110373 | Gm42303 | 20 | ENSMUSG00000039252 | Lgi2     | 16 |
| ENSMUSG00000108348 | Gm42372 | 9  | ENSMUSG00000033595 | Lgi3     | 18 |
| ENSMUSG00000105255 | Gm42413 | 20 | ENSMUSG00000036560 | Lgi4     | 20 |
| ENSMUSG00000098178 | Gm42418 | 9  | ENSMUSG00000021190 | Lgmn     | 9  |
| ENSMUSG00000104633 | Gm42421 | 20 | ENSMUSG00000050199 | Lgr4     | 19 |
| ENSMUSG00000105335 | Gm42423 | 20 | ENSMUSG00000020140 | Lgr5     | 20 |
| ENSMUSG00000105962 | Gm42432 | 20 | ENSMUSG00000042793 | Lgr6     | 9  |
| ENSMUSG00000105230 | Gm42433 | 20 | ENSMUSG00000024107 | Lhcgr    | 20 |
| ENSMUSG00000105517 | Gm42436 | 20 | ENSMUSG00000048332 | Lhfp     | 18 |
| ENSMUSG00000106048 | Gm42444 | 20 | ENSMUSG00000045312 | Lhfpl2   | 9  |
| ENSMUSG00000106411 | Gm42445 | 20 | ENSMUSG00000106379 | Lhfpl3   | 18 |
| ENSMUSG00000106491 | Gm42446 | 1  | ENSMUSG00000042873 | Lhfpl4   | 12 |
| ENSMUSG00000105485 | Gm42447 | 20 | ENSMUSG00000062252 | Lhfpl5   | 20 |
| ENSMUSG00000104625 | Gm42448 | 20 | ENSMUSG00000030946 | Lhpp     | 20 |
| ENSMUSG00000104612 | Gm42449 | 19 | ENSMUSG00000018698 | Lhx1     | 18 |
| ENSMUSG00000106637 | Gm42455 | 20 | ENSMUSG00000087211 | Lhx1os   | 9  |
| ENSMUSG00000105736 | Gm42456 | 9  | ENSMUSG00000000247 | Lhx2     | 9  |
| ENSMUSG00000104728 | Gm42462 | 20 | ENSMUSG00000029595 | Lhx5     | 9  |
| ENSMUSG00000106032 | Gm42463 | 20 | ENSMUSG00000026890 | Lhx6     | 3  |
| ENSMUSG00000107136 | Gm42466 | 20 | ENSMUSG00000096225 | Lhx8     | 19 |
| ENSMUSG00000106751 | Gm42467 | 20 | ENSMUSG00000019230 | Lhx9     | 19 |
| ENSMUSG00000110124 | Gm4247  | 1  | ENSMUSG00000029199 | Lias     | 20 |
| ENSMUSG00000106337 | Gm42478 | 20 | ENSMUSG00000034394 | Lif      | 20 |
| ENSMUSG00000105877 | Gm42479 | 20 | ENSMUSG00000054263 | Lifr     | 1  |
| ENSMUSG00000105051 | Gm4248  | 20 | ENSMUSG00000056394 | Lig1     | 7  |
| ENSMUSG00000105637 | Gm42480 | 20 | ENSMUSG00000020697 | Lig3     | 20 |
| ENSMUSG00000104821 | Gm42481 | 20 | ENSMUSG00000049717 | Lig4     | 20 |
| ENSMUSG00000105050 | Gm42482 | 20 | ENSMUSG00000070873 | Lilra5   | 9  |
| ENSMUSG00000106646 | Gm42483 | 20 | ENSMUSG00000112148 | Lilrb4a  | 20 |
| ENSMUSG00000104709 | Gm42484 | 20 | ENSMUSG00000023022 | Lima1    | 9  |
| ENSMUSG00000105049 | Gm42486 | 20 | ENSMUSG00000037736 | Limch1   | 17 |
| ENSMUSG00000104833 | Gm42489 | 20 | ENSMUSG00000025239 | Limd1    | 20 |
| ENSMUSG00000106265 | Gm42490 | 20 | ENSMUSG00000040699 | Limd2    | 9  |
| ENSMUSG00000106275 | Gm42495 | 20 | ENSMUSG00000090077 | Lime1    | 20 |
| ENSMUSG00000105772 | Gm42496 | 3  | ENSMUSG00000029674 | Limk1    | 18 |
| ENSMUSG00000104581 | Gm42497 | 20 | ENSMUSG00000020451 | Limk2    | 9  |
| ENSMUSG00000104727 | Gm42500 | 20 | ENSMUSG00000019920 | Lims1    | 20 |
| ENSMUSG00000104708 | Gm42503 | 20 | ENSMUSG00000024395 | Lims2    | 20 |
| ENSMUSG00000106934 | Gm42506 | 20 | ENSMUSG00000063804 | Lin28b   | 20 |
| ENSMUSG00000104860 | Gm42510 | 20 | ENSMUSG00000036845 | Lin37    | 20 |
| ENSMUSG00000105553 | Gm42514 | 20 | ENSMUSG00000085793 | Lin52    | 20 |
| ENSMUSG00000105378 | Gm42515 | 20 | ENSMUSG00000035310 | Lin54    | 7  |

|                    |         |    |                    |          |    |
|--------------------|---------|----|--------------------|----------|----|
| ENSMUSG00000105867 | Gm42517 | 20 | ENSMUSG00000019906 | Lin7a    | 20 |
| ENSMUSG00000106304 | Gm42518 | 20 | ENSMUSG00000003872 | Lin7b    | 3  |
| ENSMUSG00000105745 | Gm42521 | 20 | ENSMUSG00000027162 | Lin7c    | 9  |
| ENSMUSG00000105253 | Gm42522 | 20 | ENSMUSG00000058729 | Lin9     | 12 |
| ENSMUSG00000105969 | Gm42525 | 9  | ENSMUSG00000049556 | Lingo1   | 19 |
| ENSMUSG00000105592 | Gm42527 | 6  | ENSMUSG00000045083 | Lingo2   | 9  |
| ENSMUSG00000107134 | Gm42528 | 9  | ENSMUSG00000051067 | Lingo3   | 9  |
| ENSMUSG00000107178 | Gm42531 | 19 | ENSMUSG00000044505 | Lingo4   | 9  |
| ENSMUSG00000105502 | Gm42536 | 20 | ENSMUSG00000053091 | Lins1    | 20 |
| ENSMUSG00000105184 | Gm42537 | 20 | ENSMUSG00000024781 | Lipa     | 20 |
| ENSMUSG00000104622 | Gm42541 | 20 | ENSMUSG00000003123 | Lipe     | 9  |
| ENSMUSG00000104869 | Gm42544 | 18 | ENSMUSG00000053846 | Lipg     | 20 |
| ENSMUSG00000106990 | Gm42547 | 20 | ENSMUSG00000044626 | Liph     | 20 |
| ENSMUSG00000106959 | Gm42548 | 20 | ENSMUSG00000087303 | Lipo2    | 1  |
| ENSMUSG00000107320 | Gm42549 | 20 | ENSMUSG00000024766 | Lipo3    | 1  |
| ENSMUSG00000107199 | Gm42550 | 7  | ENSMUSG00000037216 | Lipt1    | 1  |
| ENSMUSG00000105374 | Gm42551 | 20 | ENSMUSG00000030725 | Lipt2    | 20 |
| ENSMUSG00000105087 | Gm42552 | 20 | ENSMUSG00000022500 | Litaf    | 16 |
| ENSMUSG00000107227 | Gm42559 | 20 | ENSMUSG00000047786 | Lix1     | 17 |
| ENSMUSG00000107246 | Gm42560 | 1  | ENSMUSG00000049288 | Lix1l    | 1  |
| ENSMUSG00000103703 | Gm42568 | 20 | ENSMUSG00000020536 | Llg1     | 1  |
| ENSMUSG00000107109 | Gm42571 | 20 | ENSMUSG00000020782 | Llg2     | 20 |
| ENSMUSG00000107171 | Gm42572 | 16 | ENSMUSG00000020224 | Llph     | 12 |
| ENSMUSG00000107205 | Gm42576 | 1  | ENSMUSG00000083364 | Llph-ps2 | 20 |
| ENSMUSG00000107306 | Gm42577 | 20 | ENSMUSG00000041891 | Lman1    | 20 |
| ENSMUSG00000098243 | Gm4258  | 20 | ENSMUSG00000021484 | Lman2    | 20 |
| ENSMUSG00000106826 | Gm42583 | 9  | ENSMUSG00000001143 | Lman2l   | 20 |
| ENSMUSG00000107097 | Gm42584 | 1  | ENSMUSG00000010721 | Lmbr1    | 20 |
| ENSMUSG00000105161 | Gm42595 | 2  | ENSMUSG00000022999 | Lmbr1l   | 20 |
| ENSMUSG00000105980 | Gm42597 | 6  | ENSMUSG00000073725 | Lmbrd1   | 20 |
| ENSMUSG00000105711 | Gm42598 | 20 | ENSMUSG00000057604 | Lmcd1    | 20 |
| ENSMUSG00000107278 | Gm42600 | 20 | ENSMUSG00000002279 | Lmf1     | 9  |
| ENSMUSG00000104698 | Gm42602 | 20 | ENSMUSG00000022614 | Lmf2     | 20 |
| ENSMUSG00000105356 | Gm42603 | 20 | ENSMUSG00000022802 | Lmln     | 20 |
| ENSMUSG00000106354 | Gm42607 | 9  | ENSMUSG00000028063 | Lmna     | 9  |
| ENSMUSG00000106651 | Gm42608 | 8  | ENSMUSG00000024590 | Lmnb1    | 20 |
| ENSMUSG00000105643 | Gm42611 | 10 | ENSMUSG00000062075 | Lmnb2    | 20 |
| ENSMUSG00000105442 | Gm42614 | 20 | ENSMUSG00000054966 | Lmntd1   | 18 |
| ENSMUSG00000105622 | Gm42615 | 20 | ENSMUSG00000036111 | Lmo1     | 20 |
| ENSMUSG00000106010 | Gm42616 | 20 | ENSMUSG00000032698 | Lmo2     | 9  |
| ENSMUSG00000104919 | Gm42617 | 20 | ENSMUSG00000030226 | Lmo3     | 18 |
| ENSMUSG00000106832 | Gm42632 | 20 | ENSMUSG00000028266 | Lmo4     | 18 |
| ENSMUSG00000106458 | Gm42633 | 20 | ENSMUSG00000033060 | Lmo7     | 9  |
| ENSMUSG00000105940 | Gm42635 | 20 | ENSMUSG00000048096 | Lmod1    | 20 |
| ENSMUSG00000104682 | Gm42636 | 20 | ENSMUSG00000038970 | Lmtk2    | 9  |
| ENSMUSG00000104871 | Gm42639 | 20 | ENSMUSG00000062044 | Lmtk3    | 20 |
| ENSMUSG00000105431 | Gm42640 | 20 | ENSMUSG00000026686 | Lmx1a    | 13 |
| ENSMUSG00000106682 | Gm42648 | 20 | ENSMUSG00000038765 | Lmx1b    | 1  |
| ENSMUSG00000104877 | Gm42651 | 9  | ENSMUSG00000044471 | Lncpint  | 20 |
| ENSMUSG00000106841 | Gm42656 | 20 | ENSMUSG00000116305 | Lncppara | 2  |
| ENSMUSG00000106251 | Gm42658 | 20 | ENSMUSG00000109588 | Lnp1     | 20 |
| ENSMUSG00000105655 | Gm42659 | 1  | ENSMUSG00000023845 | Lnpep    | 3  |
| ENSMUSG00000106099 | Gm42664 | 20 | ENSMUSG00000009207 | Lnpk     | 12 |
| ENSMUSG00000106631 | Gm42669 | 20 | ENSMUSG00000029228 | Lnx1     | 18 |
| ENSMUSG00000105395 | Gm42672 | 20 | ENSMUSG00000016520 | Lnx2     | 20 |

|                    |         |  |    |                    |        |    |
|--------------------|---------|--|----|--------------------|--------|----|
| ENSMUSG00000104626 | Gm42675 |  | 20 | ENSMUSG00000041168 | Lonp1  | 20 |
| ENSMUSG00000105041 | Gm42676 |  | 20 | ENSMUSG00000047866 | Lonp2  | 20 |
| ENSMUSG00000105848 | Gm42683 |  | 20 | ENSMUSG00000039633 | Lonrf1 | 20 |
| ENSMUSG00000105392 | Gm42684 |  | 20 | ENSMUSG00000048814 | Lonrf2 | 3  |
| ENSMUSG00000105740 | Gm42685 |  | 20 | ENSMUSG00000016239 | Lonrf3 | 20 |
| ENSMUSG00000104535 | Gm42686 |  | 20 | ENSMUSG00000043165 | Lor    | 20 |
| ENSMUSG00000079511 | Gm42688 |  | 20 | ENSMUSG00000024529 | Lox    | 20 |
| ENSMUSG00000104901 | Gm42692 |  | 20 | ENSMUSG00000032818 | Loxhd1 | 18 |
| ENSMUSG00000104721 | Gm42696 |  | 20 | ENSMUSG00000032334 | Loxl1  | 3  |
| ENSMUSG00000105083 | Gm42699 |  | 20 | ENSMUSG00000034205 | Loxl2  | 20 |
| ENSMUSG00000105148 | Gm42700 |  | 20 | ENSMUSG00000000693 | Loxl3  | 20 |
| ENSMUSG00000104583 | Gm42701 |  | 20 | ENSMUSG00000038668 | Lpar1  | 20 |
| ENSMUSG00000106443 | Gm42702 |  | 20 | ENSMUSG00000031861 | Lpar2  | 20 |
| ENSMUSG00000105811 | Gm42707 |  | 20 | ENSMUSG00000049929 | Lpar4  | 9  |
| ENSMUSG00000107023 | Gm42715 |  | 20 | ENSMUSG00000033446 | Lpar6  | 20 |
| ENSMUSG00000105264 | Gm42716 |  | 1  | ENSMUSG00000021608 | Lpcat1 | 20 |
| ENSMUSG00000106197 | Gm42717 |  | 20 | ENSMUSG00000033192 | Lpcat2 | 1  |
| ENSMUSG00000106093 | Gm42722 |  | 1  | ENSMUSG00000004270 | Lpcat3 | 20 |
| ENSMUSG00000105601 | Gm42725 |  | 20 | ENSMUSG00000027134 | Lpcat4 | 1  |
| ENSMUSG00000106767 | Gm42727 |  | 20 | ENSMUSG00000026623 | Lpgat1 | 3  |
| ENSMUSG00000107158 | Gm42728 |  | 20 | ENSMUSG00000020593 | Lpin1  | 9  |
| ENSMUSG00000106696 | Gm42729 |  | 20 | ENSMUSG00000024052 | Lpin2  | 19 |
| ENSMUSG00000106758 | Gm42731 |  | 20 | ENSMUSG00000027412 | Lpin3  | 20 |
| ENSMUSG00000107331 | Gm42732 |  | 1  | ENSMUSG00000015568 | Lpl    | 18 |
| ENSMUSG00000107041 | Gm42735 |  | 20 | ENSMUSG00000009356 | Lpo    | 20 |
| ENSMUSG00000106859 | Gm42737 |  | 9  | ENSMUSG00000033306 | Lpp    | 1  |
| ENSMUSG00000107219 | Gm42738 |  | 6  | ENSMUSG00000024696 | Lpxn   | 20 |
| ENSMUSG00000107068 | Gm42742 |  | 20 | ENSMUSG00000028003 | Lrat   | 20 |
| ENSMUSG00000050936 | Gm42743 |  | 16 | ENSMUSG00000020607 | Lratd1 | 18 |
| ENSMUSG00000105742 | Gm42748 |  | 1  | ENSMUSG00000072568 | Lratd2 | 13 |
| ENSMUSG00000104674 | Gm42756 |  | 1  | ENSMUSG00000028080 | Lrba   | 7  |
| ENSMUSG00000104983 | Gm42763 |  | 20 | ENSMUSG00000068015 | Lrch1  | 18 |
| ENSMUSG00000104929 | Gm42766 |  | 19 | ENSMUSG00000031290 | Lrch2  | 4  |
| ENSMUSG00000104562 | Gm42767 |  | 19 | ENSMUSG00000022801 | Lrch3  | 3  |
| ENSMUSG00000104661 | Gm42768 |  | 19 | ENSMUSG00000093445 | Lrch4  | 20 |
| ENSMUSG00000105922 | Gm42769 |  | 12 | ENSMUSG00000030600 | Lrfn1  | 9  |
| ENSMUSG00000105983 | Gm42770 |  | 19 | ENSMUSG00000040490 | Lrfn2  | 9  |
| ENSMUSG00000106579 | Gm42771 |  | 19 | ENSMUSG00000036957 | Lrfn3  | 1  |
| ENSMUSG00000105700 | Gm42772 |  | 19 | ENSMUSG00000045045 | Lrfn4  | 19 |
| ENSMUSG00000105009 | Gm42774 |  | 20 | ENSMUSG00000035653 | Lrfn5  | 12 |
| ENSMUSG00000104676 | Gm42777 |  | 20 | ENSMUSG00000056215 | Lrguk  | 9  |
| ENSMUSG00000105112 | Gm42778 |  | 20 | ENSMUSG00000056260 | Lrif1  | 20 |
| ENSMUSG00000105890 | Gm42780 |  | 18 | ENSMUSG00000030029 | Lrig1  | 18 |
| ENSMUSG00000105976 | Gm42782 |  | 20 | ENSMUSG00000032913 | Lrig2  | 10 |
| ENSMUSG00000104795 | Gm42783 |  | 20 | ENSMUSG00000020105 | Lrig3  | 20 |
| ENSMUSG00000106892 | Gm42791 |  | 20 | ENSMUSG00000063458 | Lrmda  | 20 |
| ENSMUSG00000106717 | Gm42798 |  | 9  | ENSMUSG00000030263 | Lrmp   | 20 |
| ENSMUSG00000105728 | Gm42819 |  | 13 | ENSMUSG00000040249 | Lrp1   | 9  |
| ENSMUSG00000106427 | Gm42820 |  | 13 | ENSMUSG00000022175 | Lrp10  | 13 |
| ENSMUSG00000106596 | Gm42822 |  | 9  | ENSMUSG00000022305 | Lrp12  | 20 |
| ENSMUSG00000106001 | Gm42826 |  | 10 | ENSMUSG00000049252 | Lrp1b  | 2  |
| ENSMUSG00000105895 | Gm42829 |  | 20 | ENSMUSG00000027070 | Lrp2   | 20 |
| ENSMUSG00000105520 | Gm42837 |  | 20 | ENSMUSG00000031637 | Lrp2bp | 20 |
| ENSMUSG00000104938 | Gm42840 |  | 20 | ENSMUSG00000001802 | Lrp3   | 1  |
| ENSMUSG00000106528 | Gm42841 |  | 20 | ENSMUSG00000027253 | Lrp4   | 20 |

|                    |         |    |                    |         |    |
|--------------------|---------|----|--------------------|---------|----|
| ENSMUSG00000106211 | Gm42842 | 9  | ENSMUSG00000024913 | Lrp5    | 13 |
| ENSMUSG00000105293 | Gm42843 | 12 | ENSMUSG00000030201 | Lrp6    | 20 |
| ENSMUSG00000106743 | Gm42847 | 5  | ENSMUSG00000028613 | Lrp8    | 19 |
| ENSMUSG00000107043 | Gm42849 | 18 | ENSMUSG00000073779 | Lrp8os2 | 3  |
| ENSMUSG00000085829 | Gm4285  | 18 | ENSMUSG00000087200 | Lrp8os3 | 20 |
| ENSMUSG00000106688 | Gm42851 | 20 | ENSMUSG00000029103 | Lrpap1  | 19 |
| ENSMUSG00000107021 | Gm42853 | 9  | ENSMUSG00000024120 | Lrpprc  | 3  |
| ENSMUSG00000106914 | Gm42854 | 20 | ENSMUSG00000032352 | Lrrc1   | 9  |
| ENSMUSG00000106946 | Gm42856 | 20 | ENSMUSG00000090291 | Lrrc10b | 9  |
| ENSMUSG00000107276 | Gm42858 | 10 | ENSMUSG00000033728 | Lrrc14  | 20 |
| ENSMUSG00000105179 | Gm42866 | 20 | ENSMUSG00000021579 | Lrrc14b | 20 |
| ENSMUSG00000107128 | Gm42867 | 20 | ENSMUSG00000039883 | Lrrc17  | 10 |
| ENSMUSG00000105137 | Gm42869 | 20 | ENSMUSG00000041673 | Lrrc18  | 12 |
| ENSMUSG00000105719 | Gm42872 | 20 | ENSMUSG00000032495 | Lrrc2   | 20 |
| ENSMUSG00000105217 | Gm42873 | 20 | ENSMUSG00000037151 | Lrrc20  | 20 |
| ENSMUSG00000105259 | Gm42874 | 20 | ENSMUSG00000030125 | Lrrc23  | 13 |
| ENSMUSG00000105691 | Gm42876 | 20 | ENSMUSG00000033707 | Lrrc24  | 20 |
| ENSMUSG00000107085 | Gm42883 | 20 | ENSMUSG00000030556 | Lrrc28  | 20 |
| ENSMUSG00000107090 | Gm42884 | 20 | ENSMUSG00000041679 | Lrrc29  | 20 |
| ENSMUSG00000107148 | Gm42888 | 9  | ENSMUSG00000051652 | Lrrc3   | 18 |
| ENSMUSG00000105852 | Gm42890 | 20 | ENSMUSG00000090958 | Lrrc32  | 20 |
| ENSMUSG00000106073 | Gm42892 | 20 | ENSMUSG00000054320 | Lrrc36  | 14 |
| ENSMUSG00000106415 | Gm42893 | 20 | ENSMUSG00000045201 | Lrrc3b  | 20 |
| ENSMUSG00000106694 | Gm42894 | 3  | ENSMUSG00000049939 | Lrrc4   | 4  |
| ENSMUSG00000106676 | Gm42895 | 20 | ENSMUSG00000063052 | Lrrc40  | 20 |
| ENSMUSG00000107295 | Gm42896 | 3  | ENSMUSG00000028703 | Lrrc41  | 1  |
| ENSMUSG00000107207 | Gm42897 | 20 | ENSMUSG00000028617 | Lrrc42  | 20 |
| ENSMUSG00000104687 | Gm42899 | 18 | ENSMUSG00000063409 | Lrrc43  | 14 |
| ENSMUSG00000106671 | Gm42900 | 20 | ENSMUSG00000025145 | Lrrc45  | 20 |
| ENSMUSG00000104850 | Gm42901 | 20 | ENSMUSG00000020878 | Lrrc46  | 20 |
| ENSMUSG00000106396 | Gm42902 | 18 | ENSMUSG00000029028 | Lrrc47  | 20 |
| ENSMUSG00000106254 | Gm42907 | 20 | ENSMUSG00000047766 | Lrrc49  | 20 |
| ENSMUSG00000104940 | Gm42908 | 20 | ENSMUSG00000047085 | Lrrc4b  | 12 |
| ENSMUSG00000105514 | Gm42913 | 20 | ENSMUSG00000050587 | Lrrc4c  | 9  |
| ENSMUSG00000106209 | Gm42918 | 20 | ENSMUSG00000064307 | Lrrc51  | 20 |
| ENSMUSG00000106404 | Gm42919 | 19 | ENSMUSG00000075224 | Lrrc55  | 20 |
| ENSMUSG00000106022 | Gm42929 | 12 | ENSMUSG00000038637 | Lrrc56  | 20 |
| ENSMUSG00000106940 | Gm42930 | 20 | ENSMUSG00000027286 | Lrrc57  | 19 |
| ENSMUSG00000106295 | Gm42932 | 20 | ENSMUSG00000034158 | Lrrc58  | 3  |
| ENSMUSG00000106189 | Gm42933 | 20 | ENSMUSG00000020869 | Lrrc59  | 18 |
| ENSMUSG00000104737 | Gm42937 | 20 | ENSMUSG00000022375 | Lrrc6   | 1  |
| ENSMUSG00000078377 | Gm4294  | 20 | ENSMUSG00000073096 | Lrrc61  | 1  |
| ENSMUSG00000106025 | Gm42940 | 20 | ENSMUSG00000023151 | Lrrc69  | 20 |
| ENSMUSG00000104693 | Gm42941 | 20 | ENSMUSG00000028176 | Lrrc7   | 7  |
| ENSMUSG00000106047 | Gm42942 | 20 | ENSMUSG00000023084 | Lrrc71  | 20 |
| ENSMUSG00000106385 | Gm42943 | 9  | ENSMUSG00000071073 | Lrrc73  | 20 |
| ENSMUSG00000104696 | Gm42946 | 20 | ENSMUSG00000022759 | Lrrc74b | 14 |
| ENSMUSG00000104822 | Gm42967 | 20 | ENSMUSG00000046417 | Lrrc75a | 20 |
| ENSMUSG00000105822 | Gm42969 | 3  | ENSMUSG00000046807 | Lrrc75b | 18 |
| ENSMUSG00000106446 | Gm42970 | 20 | ENSMUSG00000007476 | Lrrc8a  | 20 |
| ENSMUSG00000105568 | Gm42971 | 3  | ENSMUSG00000070639 | Lrrc8b  | 9  |
| ENSMUSG00000105445 | Gm42972 | 16 | ENSMUSG00000054720 | Lrrc8c  | 20 |
| ENSMUSG00000105733 | Gm42973 | 20 | ENSMUSG00000046079 | Lrrc8d  | 20 |
| ENSMUSG00000104963 | Gm42974 | 3  | ENSMUSG00000021090 | Lrrc9   | 20 |
| ENSMUSG00000104814 | Gm42979 | 20 | ENSMUSG00000027550 | Lrrcc1  | 5  |

|                    |         |    |                    |         |    |
|--------------------|---------|----|--------------------|---------|----|
| ENSMUSG00000105282 | Gm42981 | 17 | ENSMUSG00000040367 | Lrrd1   | 1  |
| ENSMUSG00000104784 | Gm42984 | 20 | ENSMUSG00000026305 | Lrrfip1 | 9  |
| ENSMUSG00000107118 | Gm42986 | 20 | ENSMUSG00000032497 | Lrrfip2 | 20 |
| ENSMUSG00000106178 | Gm42987 | 20 | ENSMUSG00000019892 | Lrriq1  | 13 |
| ENSMUSG00000106364 | Gm42994 | 7  | ENSMUSG00000028182 | Lrriq3  | 20 |
| ENSMUSG00000105466 | Gm42998 | 20 | ENSMUSG00000015133 | Lrrk1   | 20 |
| ENSMUSG00000107333 | Gm43008 | 10 | ENSMUSG00000036273 | Lrrk2   | 9  |
| ENSMUSG00000105586 | Gm43009 | 20 | ENSMUSG00000034648 | Lrrn1   | 3  |
| ENSMUSG00000104571 | Gm43010 | 18 | ENSMUSG00000026443 | Lrrn2   | 19 |
| ENSMUSG00000106475 | Gm43011 | 20 | ENSMUSG00000036295 | Lrrn3   | 1  |
| ENSMUSG00000105472 | Gm43024 | 1  | ENSMUSG00000060780 | Lrrtm1  | 18 |
| ENSMUSG00000107257 | Gm43028 | 20 | ENSMUSG00000071862 | Lrrtm2  | 3  |
| ENSMUSG00000106904 | Gm43029 | 20 | ENSMUSG00000042846 | Lrrtm3  | 7  |
| ENSMUSG00000106535 | Gm43031 | 20 | ENSMUSG00000052581 | Lrrtm4  | 2  |
| ENSMUSG00000106498 | Gm43032 | 3  | ENSMUSG00000026792 | Lrsam1  | 9  |
| ENSMUSG00000106662 | Gm43034 | 20 | ENSMUSG00000045776 | Lrtm1   | 20 |
| ENSMUSG00000107200 | Gm43039 | 20 | ENSMUSG00000055003 | Lrtm2   | 18 |
| ENSMUSG00000106244 | Gm43046 | 19 | ENSMUSG00000029703 | Lrwd1   | 20 |
| ENSMUSG00000105828 | Gm43048 | 5  | ENSMUSG00000061080 | Lsamp   | 19 |
| ENSMUSG00000107364 | Gm43051 | 20 | ENSMUSG00000022538 | Lsg1    | 20 |
| ENSMUSG00000107115 | Gm43052 | 20 | ENSMUSG00000037296 | Lsm1    | 20 |
| ENSMUSG00000104569 | Gm43054 | 20 | ENSMUSG00000050188 | Lsm10   | 12 |
| ENSMUSG00000107120 | Gm43059 | 20 | ENSMUSG00000044847 | Lsm11   | 19 |
| ENSMUSG00000104925 | Gm43061 | 20 | ENSMUSG00000020922 | Lsm12   | 3  |
| ENSMUSG00000104671 | Gm43062 | 20 | ENSMUSG00000066568 | Lsm14a  | 20 |
| ENSMUSG00000104764 | Gm43066 | 9  | ENSMUSG00000039108 | Lsm14b  | 9  |
| ENSMUSG00000105272 | Gm43071 | 20 | ENSMUSG0000007050  | Lsm2    | 20 |
| ENSMUSG00000106092 | Gm43072 | 9  | ENSMUSG00000034192 | Lsm3    | 20 |
| ENSMUSG00000104745 | Gm43073 | 20 | ENSMUSG00000031848 | Lsm4    | 12 |
| ENSMUSG00000105004 | Gm43075 | 20 | ENSMUSG00000091625 | Lsm5    | 20 |
| ENSMUSG00000105556 | Gm43080 | 20 | ENSMUSG00000031683 | Lsm6    | 20 |
| ENSMUSG00000106103 | Gm43081 | 20 | ENSMUSG00000035215 | Lsm7    | 12 |
| ENSMUSG00000107375 | Gm43084 | 20 | ENSMUSG00000044155 | Lsm8    | 20 |
| ENSMUSG00000105748 | Gm43088 | 20 | ENSMUSG00000071342 | Lsmem1  | 20 |
| ENSMUSG00000105948 | Gm43089 | 1  | ENSMUSG00000018819 | Lsp1    | 20 |
| ENSMUSG00000104882 | Gm43096 | 20 | ENSMUSG00000001247 | Lsr     | 20 |
| ENSMUSG00000105358 | Gm43099 | 6  | ENSMUSG00000033105 | Lss     | 20 |
| ENSMUSG00000104653 | Gm43109 | 20 | ENSMUSG00000073412 | Lst1    | 20 |
| ENSMUSG00000105081 | Gm43110 | 20 | ENSMUSG00000024402 | Lta     | 20 |
| ENSMUSG00000106472 | Gm43111 | 20 | ENSMUSG00000015889 | Lta4h   | 20 |
| ENSMUSG00000106212 | Gm43112 | 20 | ENSMUSG00000001870 | Ltbp1   | 20 |
| ENSMUSG00000105062 | Gm43113 | 3  | ENSMUSG00000002020 | Ltbp2   | 20 |
| ENSMUSG00000104559 | Gm43118 | 20 | ENSMUSG00000024940 | Ltbp3   | 9  |
| ENSMUSG00000106560 | Gm43119 | 10 | ENSMUSG00000040488 | Ltbp4   | 9  |
| ENSMUSG00000106961 | Gm43128 | 20 | ENSMUSG00000030339 | Ltbr    | 20 |
| ENSMUSG00000105750 | Gm43130 | 6  | ENSMUSG00000020377 | Ltc4s   | 13 |
| ENSMUSG00000104704 | Gm43133 | 20 | ENSMUSG00000027297 | Ltk     | 20 |
| ENSMUSG00000104970 | Gm43137 | 20 | ENSMUSG00000052299 | Ltn1    | 20 |
| ENSMUSG00000104720 | Gm43138 | 20 | ENSMUSG00000031072 | LTO1    | 20 |
| ENSMUSG00000105286 | Gm43140 | 11 | ENSMUSG00000019814 | Ltv1    | 1  |
| ENSMUSG00000106241 | Gm43143 | 20 | ENSMUSG00000024188 | Luc7l   | 4  |
| ENSMUSG00000104591 | Gm43145 | 20 | ENSMUSG00000029823 | Luc7l2  | 2  |
| ENSMUSG00000105229 | Gm43149 | 20 | ENSMUSG00000020863 | Luc7l3  | 20 |
| ENSMUSG00000086804 | Gm43154 | 20 | ENSMUSG00000036446 | Lum     | 20 |
| ENSMUSG00000104587 | Gm43161 | 20 | ENSMUSG00000028701 | Lurap1  | 20 |

|                    |         |    |                    |         |    |
|--------------------|---------|----|--------------------|---------|----|
| ENSMUSG00000104724 | Gm43162 | 1  | ENSMUSG00000048706 | Lurap1l | 20 |
| ENSMUSG00000106729 | Gm43165 | 20 | ENSMUSG00000001089 | Luzp1   | 19 |
| ENSMUSG00000106710 | Gm43166 | 20 | ENSMUSG00000063297 | Luzp2   | 19 |
| ENSMUSG00000106992 | Gm43167 | 20 | ENSMUSG00000115546 | Gm49077 | 20 |
| ENSMUSG00000107358 | Gm43168 | 20 | ENSMUSG00000115249 | Gm49085 | 19 |
| ENSMUSG00000107374 | Gm43172 | 20 | ENSMUSG00000115454 | Gm49086 | 20 |
| ENSMUSG00000107194 | Gm43173 | 20 | ENSMUSG00000115318 | Gm49089 | 20 |
| ENSMUSG00000106292 | Gm43174 | 20 | ENSMUSG00000115842 | Gm49092 | 20 |
| ENSMUSG00000105942 | Gm43175 | 2  | ENSMUSG00000115316 | Gm49096 | 20 |
| ENSMUSG00000106648 | Gm43176 | 12 | ENSMUSG00000114880 | Gm49098 | 20 |
| ENSMUSG00000104847 | Gm43177 | 20 | ENSMUSG00000115148 | Gm49125 | 20 |
| ENSMUSG00000106607 | Gm43178 | 20 | ENSMUSG00000115234 | Gm49130 | 1  |
| ENSMUSG00000104621 | Gm43185 | 9  | ENSMUSG00000115429 | Gm49153 | 13 |
| ENSMUSG00000106497 | Gm43195 | 20 | ENSMUSG00000115306 | Gm49159 | 20 |
| ENSMUSG00000107215 | Gm43197 | 20 | ENSMUSG00000115718 | Gm49179 | 20 |
| ENSMUSG00000105457 | Gm43200 | 20 | ENSMUSG00000115155 | Gm49182 | 3  |
| ENSMUSG00000104852 | Gm43201 | 20 | ENSMUSG00000115373 | Gm49194 | 9  |
| ENSMUSG00000104897 | Gm43203 | 20 | ENSMUSG00000115833 | Gm49196 | 12 |
| ENSMUSG00000105419 | Gm43205 | 20 | ENSMUSG00000115184 | Gm49197 | 3  |
| ENSMUSG00000105011 | Gm43210 | 20 | ENSMUSG00000115564 | Gm49199 | 20 |
| ENSMUSG00000105760 | Gm43211 | 20 | ENSMUSG00000115124 | Gm49201 | 20 |
| ENSMUSG00000087233 | Gm43213 | 19 | ENSMUSG00000115624 | Gm49204 | 20 |
| ENSMUSG00000107312 | Gm43229 | 20 | ENSMUSG00000115224 | Gm49215 | 20 |
| ENSMUSG00000106753 | Gm43230 | 20 | ENSMUSG00000115383 | Gm49216 | 20 |
| ENSMUSG00000107240 | Gm43231 | 20 | ENSMUSG00000114602 | Gm49223 | 20 |
| ENSMUSG00000105694 | Gm43237 | 20 | ENSMUSG00000115469 | Gm49227 | 20 |
| ENSMUSG00000105966 | Gm43242 | 1  | ENSMUSG00000073427 | Gm4924  | 1  |
| ENSMUSG00000105957 | Gm43254 | 20 | ENSMUSG00000115141 | Gm49256 | 20 |
| ENSMUSG00000104568 | Gm43255 | 1  | ENSMUSG00000115264 | Gm49260 | 20 |
| ENSMUSG00000105818 | Gm43256 | 20 | ENSMUSG00000115329 | Gm49272 | 20 |
| ENSMUSG00000105846 | Gm43258 | 20 | ENSMUSG00000112515 | Gm4928  | 12 |
| ENSMUSG00000106432 | Gm43259 | 10 | ENSMUSG00000115073 | Gm49283 | 20 |
| ENSMUSG00000105933 | Gm43260 | 20 | ENSMUSG00000114995 | Gm49284 | 20 |
| ENSMUSG00000107173 | Gm43266 | 20 | ENSMUSG00000115645 | Gm49288 | 20 |
| ENSMUSG00000104662 | Gm43267 | 20 | ENSMUSG00000114860 | Gm49291 | 20 |
| ENSMUSG00000107182 | Gm43268 | 20 | ENSMUSG00000115674 | Gm49297 | 20 |
| ENSMUSG00000105632 | Gm43272 | 20 | ENSMUSG00000115406 | Gm49300 | 20 |
| ENSMUSG00000104966 | Gm43273 | 20 | ENSMUSG00000115555 | Gm49307 | 20 |
| ENSMUSG00000107116 | Gm43274 | 20 | ENSMUSG00000115210 | Gm49308 | 20 |
| ENSMUSG00000106798 | Gm43275 | 20 | ENSMUSG00000115686 | Gm49310 | 20 |
| ENSMUSG00000107300 | Gm43279 | 13 | ENSMUSG00000115095 | Gm49311 | 18 |
| ENSMUSG00000106749 | Gm43281 | 20 | ENSMUSG00000115771 | Gm49312 | 20 |
| ENSMUSG00000107290 | Gm43282 | 19 | ENSMUSG00000111462 | Gm49317 | 20 |
| ENSMUSG00000106490 | Gm43283 | 18 | ENSMUSG00000035370 | Gm49322 | 20 |
| ENSMUSG00000105562 | Gm43287 | 18 | ENSMUSG00000113294 | Gm49326 | 20 |
| ENSMUSG00000106220 | Gm43288 | 18 | ENSMUSG00000113536 | Gm49327 | 1  |
| ENSMUSG00000104917 | Gm43289 | 20 | ENSMUSG00000113642 | Gm49329 | 19 |
| ENSMUSG00000104641 | Gm43290 | 1  | ENSMUSG00000114025 | Gm49331 | 20 |
| ENSMUSG00000107094 | Gm43294 | 9  | ENSMUSG00000112035 | Gm49335 | 20 |
| ENSMUSG00000105572 | Gm43300 | 9  | ENSMUSG00000114797 | Gm49336 | 2  |
| ENSMUSG00000105703 | Gm43305 | 12 | ENSMUSG00000111128 | Gm49338 | 20 |
| ENSMUSG00000105990 | Gm43307 | 20 | ENSMUSG00000110723 | Gm49353 | 20 |
| ENSMUSG00000107197 | Gm43312 | 20 | ENSMUSG00000113450 | Gm49359 | 20 |
| ENSMUSG00000107083 | Gm43313 | 20 | ENSMUSG00000114479 | Gm49375 | 1  |
| ENSMUSG00000105332 | Gm43316 | 19 | ENSMUSG00000112368 | Gm49376 | 20 |

|                    |         |    |                    |         |    |
|--------------------|---------|----|--------------------|---------|----|
| ENSMUSG00000104655 | Gm43317 | 19 | ENSMUSG00000114529 | Gm4939  | 20 |
| ENSMUSG00000105974 | Gm43318 | 19 | ENSMUSG00000109378 | Gm49396 | 1  |
| ENSMUSG00000105958 | Gm43319 | 19 | ENSMUSG00000024869 | Gm49405 | 9  |
| ENSMUSG00000106037 | Gm4332  | 20 | ENSMUSG00000116185 | Gm49411 | 20 |
| ENSMUSG00000106414 | Gm43320 | 20 | ENSMUSG00000116238 | Gm49413 | 20 |
| ENSMUSG00000106408 | Gm43321 | 19 | ENSMUSG00000115186 | Gm49417 | 20 |
| ENSMUSG00000105939 | Gm43322 | 20 | ENSMUSG00000116280 | Gm49435 | 20 |
| ENSMUSG00000107390 | Gm43323 | 20 | ENSMUSG00000116493 | Gm49445 | 20 |
| ENSMUSG00000104782 | Gm43326 | 18 | ENSMUSG00000116494 | Gm49449 | 20 |
| ENSMUSG00000105695 | Gm43327 | 19 | ENSMUSG00000062472 | Gm4945  | 19 |
| ENSMUSG00000105677 | Gm43328 | 20 | ENSMUSG00000116358 | Gm49450 | 20 |
| ENSMUSG00000105842 | Gm43329 | 20 | ENSMUSG00000116508 | Gm49463 | 20 |
| ENSMUSG00000106341 | Gm43330 | 20 | ENSMUSG00000118140 | Gm4949  | 20 |
| ENSMUSG00000104910 | Gm43331 | 20 | ENSMUSG00000116180 | Gm49492 | 20 |
| ENSMUSG00000105261 | Gm43333 | 20 | ENSMUSG00000108878 | Gm49493 | 20 |
| ENSMUSG00000105071 | Gm43336 | 9  | ENSMUSG00000116518 | Gm49494 | 20 |
| ENSMUSG00000105382 | Gm43339 | 20 | ENSMUSG00000069379 | Gm4950  | 20 |
| ENSMUSG00000105228 | Gm43340 | 20 | ENSMUSG00000116226 | Gm49502 | 20 |
| ENSMUSG00000105791 | Gm43341 | 3  | ENSMUSG00000073555 | Gm4951  | 20 |
| ENSMUSG00000107091 | Gm43343 | 20 | ENSMUSG00000116480 | Gm49512 | 20 |
| ENSMUSG00000097989 | Gm4335  | 20 | ENSMUSG00000115756 | Gm49519 | 20 |
| ENSMUSG00000106369 | Gm43355 | 20 | ENSMUSG00000115923 | Gm49521 | 20 |
| ENSMUSG00000105434 | Gm43359 | 20 | ENSMUSG00000116321 | Gm49522 | 20 |
| ENSMUSG00000105970 | Gm43360 | 20 | ENSMUSG00000115898 | Gm49524 | 20 |
| ENSMUSG00000105201 | Gm43362 | 20 | ENSMUSG00000116397 | Gm49525 | 20 |
| ENSMUSG00000105084 | Gm43365 | 20 | ENSMUSG00000115975 | Gm49526 | 20 |
| ENSMUSG00000107234 | Gm43371 | 20 | ENSMUSG00000061992 | Gm4953  | 12 |
| ENSMUSG00000107335 | Gm43372 | 18 | ENSMUSG00000116004 | Gm49539 | 20 |
| ENSMUSG00000107363 | Gm43373 | 7  | ENSMUSG00000116272 | Gm49540 | 18 |
| ENSMUSG00000106673 | Gm43374 | 7  | ENSMUSG00000115190 | Gm49542 | 20 |
| ENSMUSG00000106262 | Gm43375 | 20 | ENSMUSG00000116262 | Gm49544 | 20 |
| ENSMUSG00000106543 | Gm43378 | 20 | ENSMUSG00000116243 | Gm49552 | 20 |
| ENSMUSG00000105449 | Gm43379 | 20 | ENSMUSG00000116735 | Gm49555 | 20 |
| ENSMUSG00000104874 | Gm43387 | 20 | ENSMUSG00000116913 | Gm49566 | 20 |
| ENSMUSG00000106665 | Gm43389 | 18 | ENSMUSG00000105536 | Gm4959  | 1  |
| ENSMUSG00000105594 | Gm43398 | 18 | ENSMUSG00000116081 | Gm49593 | 9  |
| ENSMUSG00000106542 | Gm43410 | 9  | ENSMUSG00000116835 | Gm49594 | 20 |
| ENSMUSG00000105979 | Gm43411 | 20 | ENSMUSG00000116908 | Gm49599 | 20 |
| ENSMUSG00000105107 | Gm43412 | 20 | ENSMUSG00000116795 | Gm49600 | 20 |
| ENSMUSG00000104951 | Gm43413 | 9  | ENSMUSG00000116594 | Gm49601 | 20 |
| ENSMUSG00000106993 | Gm43417 | 20 | ENSMUSG00000113831 | Gm49602 | 20 |
| ENSMUSG00000106115 | Gm43420 | 16 | ENSMUSG00000116882 | Gm49614 | 18 |
| ENSMUSG00000104706 | Gm43421 | 20 | ENSMUSG00000110869 | Gm49628 | 20 |
| ENSMUSG00000106643 | Gm43422 | 9  | ENSMUSG00000116904 | Gm49640 | 20 |
| ENSMUSG00000105033 | Gm43423 | 20 | ENSMUSG00000113184 | Gm49654 | 18 |
| ENSMUSG00000106214 | Gm43426 | 20 | ENSMUSG00000116832 | Gm49658 | 10 |
| ENSMUSG00000105681 | Gm43428 | 20 | ENSMUSG00000116740 | Gm49659 | 18 |
| ENSMUSG00000106290 | Gm43429 | 20 | ENSMUSG00000116902 | Gm49660 | 20 |
| ENSMUSG00000106149 | Gm43430 | 20 | ENSMUSG00000116881 | Gm49674 | 7  |
| ENSMUSG00000104965 | Gm43437 | 20 | ENSMUSG00000116867 | Gm49677 | 1  |
| ENSMUSG00000104969 | Gm43445 | 9  | ENSMUSG00000116610 | Gm49678 | 20 |
| ENSMUSG00000106678 | Gm43457 | 20 | ENSMUSG00000115122 | Gm49685 | 20 |
| ENSMUSG00000105561 | Gm43462 | 20 | ENSMUSG00000085601 | Gm4969  | 20 |
| ENSMUSG00000106184 | Gm43463 | 20 | ENSMUSG00000116697 | Gm49694 | 9  |
| ENSMUSG00000105717 | Gm43465 | 9  | ENSMUSG00000116572 | Gm49695 | 20 |



|                    |         |    |                    |         |    |
|--------------------|---------|----|--------------------|---------|----|
| ENSMUSG00000105824 | Gm43466 | 20 | ENSMUSG00000116635 | Gm49699 | 7  |
| ENSMUSG00000105397 | Gm43471 | 20 | ENSMUSG00000116883 | Gm49700 | 20 |
| ENSMUSG00000107076 | Gm43480 | 20 | ENSMUSG00000116766 | Gm49702 | 9  |
| ENSMUSG00000107000 | Gm43481 | 20 | ENSMUSG00000113687 | Gm49703 | 6  |
| ENSMUSG00000106757 | Gm43482 | 2  | ENSMUSG00000116626 | Gm49705 | 6  |
| ENSMUSG00000106166 | Gm43484 | 20 | ENSMUSG00000116624 | Gm49706 | 20 |
| ENSMUSG00000106448 | Gm43486 | 20 | ENSMUSG00000109609 | Gm4972  | 20 |
| ENSMUSG00000105063 | Gm43488 | 20 | ENSMUSG00000116876 | Gm49721 | 20 |
| ENSMUSG00000097532 | Gm4349  | 1  | ENSMUSG00000116534 | Gm49731 | 20 |
| ENSMUSG00000105526 | Gm43490 | 3  | ENSMUSG00000116571 | Gm49741 | 20 |
| ENSMUSG00000106537 | Gm43502 | 9  | ENSMUSG00000116604 | Gm49745 | 20 |
| ENSMUSG00000105347 | Gm43503 | 20 | ENSMUSG00000115222 | Gm49747 | 20 |
| ENSMUSG00000104990 | Gm43504 | 20 | ENSMUSG00000116764 | Gm49748 | 20 |
| ENSMUSG00000106332 | Gm43506 | 20 | ENSMUSG00000111394 | Gm49759 | 9  |
| ENSMUSG00000105861 | Gm43508 | 20 | ENSMUSG00000116815 | Gm49760 | 1  |
| ENSMUSG00000106603 | Gm43509 | 20 | ENSMUSG00000116617 | Gm49767 | 20 |
| ENSMUSG00000104761 | Gm43511 | 20 | ENSMUSG00000115220 | Gm49768 | 20 |
| ENSMUSG00000105607 | Gm43513 | 20 | ENSMUSG00000111613 | Gm4977  | 20 |
| ENSMUSG00000089922 | Gm43517 | 9  | ENSMUSG00000111740 | Gm49783 | 20 |
| ENSMUSG00000105528 | Gm43519 | 20 | ENSMUSG00000116898 | Gm49785 | 20 |
| ENSMUSG00000106310 | Gm43523 | 18 | ENSMUSG00000116568 | Gm49790 | 20 |
| ENSMUSG00000105803 | Gm43526 | 20 | ENSMUSG00000116858 | Gm49797 | 20 |
| ENSMUSG00000106018 | Gm43527 | 20 | ENSMUSG00000117130 | Gm49802 | 20 |
| ENSMUSG00000105290 | Gm43528 | 20 | ENSMUSG00000117313 | Gm49838 | 20 |
| ENSMUSG00000091900 | Gm4353  | 9  | ENSMUSG00000117294 | Gm49839 | 20 |
| ENSMUSG00000106822 | Gm43533 | 3  | ENSMUSG00000117255 | Gm49864 | 18 |
| ENSMUSG00000105549 | Gm43540 | 20 | ENSMUSG00000117114 | Gm49867 | 17 |
| ENSMUSG00000105936 | Gm43544 | 3  | ENSMUSG00000117335 | Gm49870 | 20 |
| ENSMUSG00000106035 | Gm43545 | 2  | ENSMUSG00000117250 | Gm49871 | 1  |
| ENSMUSG00000105019 | Gm43547 | 20 | ENSMUSG00000117228 | Gm49877 | 10 |
| ENSMUSG00000107033 | Gm43553 | 9  | ENSMUSG00000117113 | Gm49883 | 20 |
| ENSMUSG00000105977 | Gm43555 | 18 | ENSMUSG00000117123 | Gm49890 | 20 |
| ENSMUSG00000117145 | Gm4356  | 3  | ENSMUSG00000117069 | Gm49894 | 20 |
| ENSMUSG00000106057 | Gm43560 | 20 | ENSMUSG00000117222 | Gm49906 | 9  |
| ENSMUSG00000105565 | Gm43566 | 3  | ENSMUSG00000117098 | Gm49909 | 11 |
| ENSMUSG00000105945 | Gm43570 | 19 | ENSMUSG00000117247 | Gm49923 | 20 |
| ENSMUSG00000106110 | Gm43571 | 9  | ENSMUSG00000117126 | Gm49924 | 20 |
| ENSMUSG00000105876 | Gm43572 | 20 | ENSMUSG00000117010 | Gm49933 | 20 |
| ENSMUSG00000104786 | Gm43573 | 20 | ENSMUSG00000117003 | Gm49937 | 20 |
| ENSMUSG00000105287 | Gm43577 | 3  | ENSMUSG00000117332 | Gm49942 | 20 |
| ENSMUSG00000106836 | Gm43578 | 20 | ENSMUSG00000117093 | Gm49949 | 20 |
| ENSMUSG00000105199 | Gm43581 | 19 | ENSMUSG00000117430 | Gm49968 | 20 |
| ENSMUSG00000106565 | Gm43582 | 20 | ENSMUSG00000117647 | Gm49969 | 20 |
| ENSMUSG00000105195 | Gm43584 | 20 | ENSMUSG00000117494 | Gm49970 | 20 |
| ENSMUSG00000106666 | Gm43587 | 18 | ENSMUSG00000117599 | Gm49971 | 20 |
| ENSMUSG00000107370 | Gm43588 | 20 | ENSMUSG00000117372 | Gm49972 | 20 |
| ENSMUSG00000104550 | Gm43589 | 20 | ENSMUSG00000117350 | Gm49975 | 20 |
| ENSMUSG00000106288 | Gm43593 | 20 | ENSMUSG00000117465 | Gm49980 | 20 |
| ENSMUSG00000107226 | Gm43594 | 20 | ENSMUSG00000106738 | Gm5     | 20 |
| ENSMUSG00000107096 | Gm43597 | 8  | ENSMUSG00000117538 | Gm50008 | 20 |
| ENSMUSG00000106927 | Gm43598 | 20 | ENSMUSG00000117653 | Gm50009 | 2  |
| ENSMUSG00000105762 | Gm43605 | 20 | ENSMUSG00000117499 | Gm50010 | 9  |
| ENSMUSG00000105663 | Gm43606 | 20 | ENSMUSG00000117628 | Gm50012 | 20 |
| ENSMUSG00000106087 | Gm43609 | 20 | ENSMUSG00000117579 | Gm50023 | 20 |
| ENSMUSG00000106054 | Gm43623 | 20 | ENSMUSG00000117521 | Gm50024 | 9  |

|                    |         |    |                    |         |    |
|--------------------|---------|----|--------------------|---------|----|
| ENSMUSG00000105636 | Gm43625 | 20 | ENSMUSG00000117507 | Gm50045 | 20 |
| ENSMUSG00000105935 | Gm43628 | 12 | ENSMUSG00000117541 | Gm50048 | 20 |
| ENSMUSG00000106962 | Gm43633 | 3  | ENSMUSG00000117448 | Gm50055 | 1  |
| ENSMUSG00000107045 | Gm43636 | 20 | ENSMUSG00000117634 | Gm50069 | 20 |
| ENSMUSG00000107225 | Gm43637 | 20 | ENSMUSG00000117440 | Gm50087 | 20 |
| ENSMUSG00000105574 | Gm43648 | 20 | ENSMUSG00000117600 | Gm50094 | 20 |
| ENSMUSG00000105992 | Gm43651 | 20 | ENSMUSG00000117818 | Gm50105 | 20 |
| ENSMUSG00000105447 | Gm43653 | 20 | ENSMUSG00000118239 | Gm50107 | 20 |
| ENSMUSG00000105804 | Gm43654 | 20 | ENSMUSG00000118234 | Gm50115 | 20 |
| ENSMUSG00000106815 | Gm43658 | 20 | ENSMUSG00000118242 | Gm50141 | 20 |
| ENSMUSG00000107383 | Gm4366  | 5  | ENSMUSG00000118184 | Gm50144 | 20 |
| ENSMUSG00000105571 | Gm43662 | 20 | ENSMUSG00000118030 | Gm50163 | 13 |
| ENSMUSG00000105578 | Gm43663 | 20 | ENSMUSG00000117757 | Gm50169 | 20 |
| ENSMUSG00000104672 | Gm43665 | 20 | ENSMUSG00000118274 | Gm50204 | 20 |
| ENSMUSG00000105135 | Gm43667 | 20 | ENSMUSG00000117947 | Gm50226 | 20 |
| ENSMUSG00000105176 | Gm43668 | 20 | ENSMUSG00000117725 | Gm50240 | 12 |
| ENSMUSG00000106019 | Gm43672 | 20 | ENSMUSG00000117819 | Gm50253 | 20 |
| ENSMUSG00000106153 | Gm43677 | 20 | ENSMUSG00000118310 | Gm50268 | 9  |
| ENSMUSG00000105950 | Gm43679 | 20 | ENSMUSG00000118287 | Gm50300 | 20 |
| ENSMUSG00000106870 | Gm43681 | 20 | ENSMUSG00000118340 | Gm50301 | 18 |
| ENSMUSG00000107019 | Gm43682 | 20 | ENSMUSG00000117410 | Gm50304 | 20 |
| ENSMUSG00000105613 | Gm43684 | 20 | ENSMUSG00000118077 | Gm50315 | 20 |
| ENSMUSG00000104974 | Gm43686 | 10 | ENSMUSG00000118138 | Gm50322 | 20 |
| ENSMUSG00000106980 | Gm43690 | 20 | ENSMUSG00000117900 | Gm50323 | 1  |
| ENSMUSG00000105429 | Gm43692 | 20 | ENSMUSG00000118026 | Gm50335 | 1  |
| ENSMUSG00000105929 | Gm43693 | 20 | ENSMUSG00000118100 | Gm50340 | 20 |
| ENSMUSG00000105304 | Gm43696 | 20 | ENSMUSG00000117951 | Gm50357 | 20 |
| ENSMUSG00000105453 | Gm43702 | 20 | ENSMUSG00000117732 | Gm50364 | 20 |
| ENSMUSG00000104903 | Gm43707 | 20 | ENSMUSG00000118198 | Gm50370 | 1  |
| ENSMUSG00000104649 | Gm43712 | 9  | ENSMUSG00000118125 | Gm50387 | 20 |
| ENSMUSG00000105079 | Gm43715 | 20 | ENSMUSG00000117789 | Gm50388 | 20 |
| ENSMUSG00000105366 | Gm43719 | 1  | ENSMUSG00000118171 | Gm50390 | 9  |
| ENSMUSG00000106202 | Gm43727 | 20 | ENSMUSG00000118210 | Gm50394 | 18 |
| ENSMUSG00000104867 | Gm43728 | 20 | ENSMUSG00000117943 | Gm50403 | 9  |
| ENSMUSG00000105692 | Gm43737 | 18 | ENSMUSG00000107028 | Gm5043  | 20 |
| ENSMUSG00000107639 | Gm4374  | 20 | ENSMUSG00000117814 | Gm50431 | 20 |
| ENSMUSG00000107165 | Gm43747 | 20 | ENSMUSG00000118052 | Gm50432 | 20 |
| ENSMUSG00000106612 | Gm43750 | 20 | ENSMUSG00000117037 | Gm50433 | 20 |
| ENSMUSG00000105322 | Gm43751 | 20 | ENSMUSG00000117930 | Gm50436 | 20 |
| ENSMUSG00000105707 | Gm43753 | 20 | ENSMUSG00000025922 | Gm5045  | 20 |
| ENSMUSG00000105368 | Gm43759 | 2  | ENSMUSG00000111515 | Gm5055  | 20 |
| ENSMUSG00000107106 | Gm43760 | 20 | ENSMUSG00000117416 | Gm5064  | 20 |
| ENSMUSG00000105119 | Gm43765 | 20 | ENSMUSG00000090671 | Gm5067  | 20 |
| ENSMUSG00000105868 | Gm43766 | 20 | ENSMUSG00000055676 | Gm5069  | 20 |
| ENSMUSG00000105412 | Gm43768 | 12 | ENSMUSG00000110235 | Gm5086  | 20 |
| ENSMUSG00000106061 | Gm43773 | 20 | ENSMUSG00000115263 | Gm5089  | 20 |
| ENSMUSG00000104631 | Gm43774 | 20 | ENSMUSG00000064052 | Gm5089  | 20 |
| ENSMUSG00000107304 | Gm43775 | 20 | ENSMUSG00000091742 | Gm5093  | 1  |
| ENSMUSG00000105946 | Gm43776 | 20 | ENSMUSG00000097279 | Gm5106  | 20 |
| ENSMUSG00000105761 | Gm43787 | 3  | ENSMUSG00000052730 | Gm5111  | 20 |
| ENSMUSG00000107286 | Gm43788 | 20 | ENSMUSG00000107868 | Gm5112  | 20 |
| ENSMUSG00000105947 | Gm43789 | 20 | ENSMUSG00000066647 | Gm5113  | 1  |
| ENSMUSG00000106818 | Gm43790 | 20 | ENSMUSG00000093862 | Gm5117  | 20 |
| ENSMUSG00000106732 | Gm43792 | 20 | ENSMUSG00000111151 | Gm5120  | 12 |
| ENSMUSG00000107155 | Gm43793 | 12 | ENSMUSG00000066626 | Gm5121  | 12 |

|                    |         |    |                    |        |    |
|--------------------|---------|----|--------------------|--------|----|
| ENSMUSG00000106772 | Gm43794 | 20 | ENSMUSG00000051537 | Gm5124 | 20 |
| ENSMUSG00000106720 | Gm43795 | 20 | ENSMUSG00000112039 | Gm5136 | 20 |
| ENSMUSG00000106867 | Gm43800 | 13 | ENSMUSG00000091183 | Gm5141 | 14 |
| ENSMUSG00000104615 | Gm43804 | 20 | ENSMUSG00000071273 | Gm5145 | 10 |
| ENSMUSG00000105971 | Gm43805 | 9  | ENSMUSG00000058174 | Gm5148 | 20 |
| ENSMUSG00000107048 | Gm43807 | 20 | ENSMUSG00000055795 | Gm5160 | 20 |
| ENSMUSG00000107140 | Gm43811 | 20 | ENSMUSG00000116802 | Gm5165 | 10 |
| ENSMUSG00000106636 | Gm43813 | 2  | ENSMUSG00000110744 | Gm5171 | 20 |
| ENSMUSG00000105510 | Gm43815 | 20 | ENSMUSG00000112621 | Gm5173 | 20 |
| ENSMUSG00000105341 | Gm43817 | 20 | ENSMUSG00000111997 | Gm5176 | 20 |
| ENSMUSG00000106224 | Gm43823 | 20 | ENSMUSG00000111942 | Gm5182 | 20 |
| ENSMUSG00000106071 | Gm43826 | 1  | ENSMUSG00000113412 | Gm5191 | 20 |
| ENSMUSG00000105530 | Gm43829 | 19 | ENSMUSG00000117729 | Gm5242 | 1  |
| ENSMUSG00000105454 | Gm43830 | 20 | ENSMUSG00000047227 | Gm527  | 13 |
| ENSMUSG00000105653 | Gm43831 | 10 | ENSMUSG00000105452 | Gm5276 | 20 |
| ENSMUSG00000106944 | Gm43843 | 20 | ENSMUSG00000105124 | Gm5297 | 20 |
| ENSMUSG00000106858 | Gm43844 | 3  | ENSMUSG00000107259 | Gm5298 | 20 |
| ENSMUSG00000105753 | Gm43847 | 20 | ENSMUSG00000108107 | Gm5312 | 12 |
| ENSMUSG00000106317 | Gm43848 | 20 | ENSMUSG00000098050 | Gm5345 | 19 |
| ENSMUSG00000106680 | Gm43852 | 20 | ENSMUSG00000087321 | Gm5353 | 7  |
| ENSMUSG00000104548 | Gm43857 | 20 | ENSMUSG00000116597 | Gm536  | 20 |
| ENSMUSG00000104546 | Gm43858 | 20 | ENSMUSG00000080715 | Gm5406 | 9  |
| ENSMUSG00000105710 | Gm43859 | 20 | ENSMUSG00000049414 | Gm5417 | 20 |
| ENSMUSG00000106928 | Gm43860 | 20 | ENSMUSG00000097245 | Gm5421 | 20 |
| ENSMUSG00000108168 | Gm43864 | 20 | ENSMUSG00000039684 | Gm5422 | 10 |
| ENSMUSG00000108008 | Gm43869 | 20 | ENSMUSG00000046687 | Gm5424 | 1  |
| ENSMUSG00000107712 | Gm43870 | 2  | ENSMUSG00000111875 | Gm5425 | 20 |
| ENSMUSG00000107913 | Gm43871 | 20 | ENSMUSG00000094374 | Gm5435 | 20 |
| ENSMUSG00000108070 | Gm43872 | 20 | ENSMUSG00000042962 | Gm5436 | 20 |
| ENSMUSG00000107606 | Gm43873 | 7  | ENSMUSG00000101930 | Gm5441 | 20 |
| ENSMUSG00000107779 | Gm43874 | 20 | ENSMUSG00000094185 | Gm5445 | 20 |
| ENSMUSG00000107454 | Gm43875 | 20 | ENSMUSG00000050243 | Gm5446 | 20 |
| ENSMUSG00000108055 | Gm43876 | 20 | ENSMUSG00000063166 | Gm5449 | 20 |
| ENSMUSG00000107571 | Gm43877 | 20 | ENSMUSG00000095847 | Gm5451 | 20 |
| ENSMUSG00000107858 | Gm43879 | 9  | ENSMUSG00000114687 | Gm5452 | 10 |
| ENSMUSG00000107886 | Gm43880 | 7  | ENSMUSG00000062461 | Gm5453 | 3  |
| ENSMUSG00000107442 | Gm43881 | 20 | ENSMUSG00000047643 | Gm5454 | 3  |
| ENSMUSG00000107433 | Gm43882 | 20 | ENSMUSG00000021741 | Gm5457 | 20 |
| ENSMUSG00000108217 | Gm43883 | 20 | ENSMUSG00000075553 | Gm5464 | 20 |
| ENSMUSG00000108123 | Gm43884 | 20 | ENSMUSG00000083397 | Gm5466 | 18 |
| ENSMUSG00000107643 | Gm43885 | 20 | ENSMUSG00000116083 | Gm5469 | 20 |
| ENSMUSG00000107515 | Gm43886 | 20 | ENSMUSG00000116215 | Gm5470 | 9  |
| ENSMUSG00000108189 | Gm43887 | 20 | ENSMUSG00000115882 | Gm5481 | 20 |
| ENSMUSG00000107782 | Gm43888 | 20 | ENSMUSG00000116912 | Gm5487 | 20 |
| ENSMUSG00000108146 | Gm43889 | 20 | ENSMUSG00000098164 | Gm5493 | 9  |
| ENSMUSG00000108053 | Gm43890 | 20 | ENSMUSG00000071035 | Gm5499 | 20 |
| ENSMUSG00000108246 | Gm43896 | 20 | ENSMUSG00000117484 | Gm5500 | 20 |
| ENSMUSG00000107757 | Gm43898 | 20 | ENSMUSG00000117730 | Gm5503 | 9  |
| ENSMUSG00000108040 | Gm43900 | 20 | ENSMUSG00000069376 | Gm5507 | 12 |
| ENSMUSG00000107680 | Gm43903 | 20 | ENSMUSG00000117669 | Gm5509 | 20 |
| ENSMUSG00000108126 | Gm43909 | 20 | ENSMUSG00000100615 | Gm5511 | 20 |
| ENSMUSG00000108024 | Gm43912 | 9  | ENSMUSG00000112693 | Gm5512 | 20 |
| ENSMUSG00000107534 | Gm43920 | 20 | ENSMUSG00000063586 | Gm5513 | 20 |
| ENSMUSG00000108256 | Gm43923 | 20 | ENSMUSG00000045104 | Gm5514 | 20 |
| ENSMUSG00000108200 | Gm43931 | 20 | ENSMUSG00000068466 | Gm5518 | 20 |

|                    |         |    |                    |        |    |
|--------------------|---------|----|--------------------|--------|----|
| ENSMUSG00000107877 | Gm43951 | 20 | ENSMUSG00000118252 | Gm5521 | 20 |
| ENSMUSG00000108067 | Gm43953 | 20 | ENSMUSG00000099492 | Gm5525 | 20 |
| ENSMUSG00000108169 | Gm43958 | 1  | ENSMUSG00000084817 | Gm5526 | 19 |
| ENSMUSG00000108249 | Gm43960 | 20 | ENSMUSG00000100007 | Gm5527 | 20 |
| ENSMUSG00000107549 | Gm43961 | 20 | ENSMUSG00000067106 | Gm5529 | 20 |
| ENSMUSG00000107962 | Gm43980 | 20 | ENSMUSG00000073535 | Gm5532 | 20 |
| ENSMUSG00000108214 | Gm43982 | 20 | ENSMUSG00000074758 | Gm5535 | 9  |
| ENSMUSG00000108238 | Gm43984 | 20 | ENSMUSG00000069008 | Gm5537 | 20 |
| ENSMUSG00000107835 | Gm43999 | 20 | ENSMUSG00000103986 | Gm5539 | 12 |
| ENSMUSG00000107966 | Gm44001 | 20 | ENSMUSG00000048916 | Gm5540 | 20 |
| ENSMUSG00000107624 | Gm44005 | 9  | ENSMUSG00000106419 | Gm5550 | 20 |
| ENSMUSG00000108035 | Gm44021 | 6  | ENSMUSG00000083477 | Gm5555 | 20 |
| ENSMUSG00000107706 | Gm44022 | 2  | ENSMUSG00000096726 | Gm5558 | 12 |
| ENSMUSG00000107955 | Gm44027 | 20 | ENSMUSG00000096617 | Gm5559 | 20 |
| ENSMUSG00000108154 | Gm44033 | 20 | ENSMUSG00000067161 | Gm5560 | 20 |
| ENSMUSG00000107726 | Gm44037 | 20 | ENSMUSG00000096474 | Gm5561 | 19 |
| ENSMUSG00000107458 | Gm44040 | 20 | ENSMUSG00000046440 | Gm5564 | 18 |
| ENSMUSG00000107604 | Gm44041 | 20 | ENSMUSG00000080002 | Gm5566 | 20 |
| ENSMUSG00000107976 | Gm44043 | 2  | ENSMUSG00000108045 | Gm5576 | 20 |
| ENSMUSG00000107690 | Gm44044 | 1  | ENSMUSG00000084950 | Gm5577 | 20 |
| ENSMUSG00000107461 | Gm44045 | 5  | ENSMUSG00000029633 | Gm5578 | 20 |
| ENSMUSG00000108137 | Gm44053 | 20 | ENSMUSG00000107906 | Gm5580 | 20 |
| ENSMUSG00000107447 | Gm44054 | 20 | ENSMUSG00000108366 | Gm5586 | 20 |
| ENSMUSG00000108095 | Gm44067 | 3  | ENSMUSG00000108518 | Gm5587 | 12 |
| ENSMUSG00000107796 | Gm44068 | 20 | ENSMUSG00000086108 | Gm5602 | 20 |
| ENSMUSG00000108004 | Gm44080 | 10 | ENSMUSG00000109181 | Gm5605 | 20 |
| ENSMUSG00000107801 | Gm44086 | 20 | ENSMUSG00000090602 | Gm5611 | 20 |
| ENSMUSG00000107927 | Gm44090 | 20 | ENSMUSG00000063543 | Gm5616 | 19 |
| ENSMUSG00000107688 | Gm44091 | 20 | ENSMUSG00000042293 | Gm5617 | 3  |
| ENSMUSG00000107576 | Gm44093 | 20 | ENSMUSG00000099980 | Gm5619 | 20 |
| ENSMUSG00000107967 | Gm44094 | 9  | ENSMUSG00000056904 | Gm5620 | 20 |
| ENSMUSG00000108219 | Gm44101 | 19 | ENSMUSG00000113660 | Gm5626 | 20 |
| ENSMUSG00000108093 | Gm44102 | 9  | ENSMUSG00000113750 | Gm5628 | 20 |
| ENSMUSG00000107583 | Gm44104 | 3  | ENSMUSG00000046993 | Gm5637 | 20 |
| ENSMUSG00000107795 | Gm44105 | 20 | ENSMUSG00000069014 | Gm5641 | 10 |
| ENSMUSG00000108122 | Gm44116 | 12 | ENSMUSG00000083311 | Gm5643 | 16 |
| ENSMUSG00000107605 | Gm44117 | 20 | ENSMUSG00000100104 | Gm5644 | 12 |
| ENSMUSG00000107999 | Gm44123 | 20 | ENSMUSG00000080866 | Gm5687 | 20 |
| ENSMUSG00000107770 | Gm44126 | 20 | ENSMUSG00000081557 | Gm5697 | 20 |
| ENSMUSG00000108211 | Gm44130 | 3  | ENSMUSG00000048600 | Gm5763 | 18 |
| ENSMUSG00000107884 | Gm44144 | 20 | ENSMUSG00000099647 | Gm5776 | 12 |
| ENSMUSG00000108152 | Gm44152 | 20 | ENSMUSG00000091825 | Gm5778 | 20 |
| ENSMUSG00000108216 | Gm44153 | 20 | ENSMUSG00000112471 | Gm5779 | 20 |
| ENSMUSG00000107756 | Gm44164 | 1  | ENSMUSG00000112140 | Gm5780 | 20 |
| ENSMUSG00000108297 | Gm44167 | 20 | ENSMUSG00000093908 | Gm5784 | 20 |
| ENSMUSG00000108049 | Gm44168 | 20 | ENSMUSG00000066487 | Gm5786 | 12 |
| ENSMUSG00000108132 | Gm44175 | 20 | ENSMUSG00000114858 | Gm5790 | 20 |
| ENSMUSG00000107676 | Gm44178 | 20 | ENSMUSG00000058581 | Gm5801 | 20 |
| ENSMUSG00000108268 | Gm44187 | 20 | ENSMUSG00000114488 | Gm5802 | 20 |
| ENSMUSG00000108092 | Gm44189 | 16 | ENSMUSG00000061848 | Gm5805 | 12 |
| ENSMUSG00000097055 | Gm4419  | 20 | ENSMUSG00000051639 | Gm5812 | 20 |
| ENSMUSG00000108267 | Gm44190 | 20 | ENSMUSG00000046952 | Gm5815 | 1  |
| ENSMUSG00000107937 | Gm44200 | 20 | ENSMUSG00000117994 | Gm5820 | 20 |
| ENSMUSG00000108079 | Gm44210 | 1  | ENSMUSG00000089993 | Gm5822 | 9  |
| ENSMUSG00000108197 | Gm44214 | 20 | ENSMUSG00000117813 | Gm5823 | 20 |

|                    |         |    |                    |        |    |
|--------------------|---------|----|--------------------|--------|----|
| ENSMUSG00000107655 | Gm44220 | 6  | ENSMUSG00000117785 | Gm5827 | 20 |
| ENSMUSG00000108286 | Gm44224 | 3  | ENSMUSG00000072978 | Gm5830 | 20 |
| ENSMUSG00000107996 | Gm44228 | 16 | ENSMUSG00000111133 | Gm5831 | 20 |
| ENSMUSG00000108088 | Gm44229 | 20 | ENSMUSG00000101795 | Gm5835 | 1  |
| ENSMUSG00000107905 | Gm44230 | 4  | ENSMUSG00000104496 | Gm5837 | 20 |
| ENSMUSG00000108173 | Gm44231 | 2  | ENSMUSG00000103921 | Gm5841 | 20 |
| ENSMUSG00000108057 | Gm44234 | 20 | ENSMUSG00000103293 | Gm5842 | 9  |
| ENSMUSG00000107917 | Gm44235 | 2  | ENSMUSG00000082896 | Gm5844 | 20 |
| ENSMUSG00000107556 | Gm44237 | 20 | ENSMUSG00000104309 | Gm5846 | 20 |
| ENSMUSG00000107498 | Gm44240 | 1  | ENSMUSG00000082280 | Gm5847 | 20 |
| ENSMUSG00000107840 | Gm44241 | 20 | ENSMUSG00000105641 | Gm5853 | 20 |
| ENSMUSG00000107826 | Gm44242 | 1  | ENSMUSG00000105558 | Gm5855 | 12 |
| ENSMUSG00000107997 | Gm44243 | 20 | ENSMUSG00000106416 | Gm5857 | 4  |
| ENSMUSG00000108199 | Gm44249 | 12 | ENSMUSG00000082927 | Gm5863 | 20 |
| ENSMUSG00000107881 | Gm44250 | 13 | ENSMUSG00000104923 | Gm5865 | 20 |
| ENSMUSG00000107971 | Gm44260 | 9  | ENSMUSG00000043484 | Gm5867 | 20 |
| ENSMUSG00000107472 | Gm44265 | 12 | ENSMUSG00000104802 | Gm5869 | 20 |
| ENSMUSG00000107553 | Gm44266 | 20 | ENSMUSG00000093651 | Gm5873 | 20 |
| ENSMUSG00000108108 | Gm44270 | 20 | ENSMUSG00000071568 | Gm5874 | 9  |
| ENSMUSG00000107586 | Gm44283 | 20 | ENSMUSG00000068262 | Gm5879 | 20 |
| ENSMUSG00000108033 | Gm44284 | 20 | ENSMUSG00000107747 | Gm5881 | 20 |
| ENSMUSG00000107707 | Gm44286 | 20 | ENSMUSG00000037827 | Gm5884 | 20 |
| ENSMUSG00000108109 | Gm44287 | 20 | ENSMUSG00000081788 | Gm5898 | 20 |
| ENSMUSG00000107483 | Gm44288 | 20 | ENSMUSG00000094685 | Gm5900 | 20 |
| ENSMUSG00000107529 | Gm44291 | 20 | ENSMUSG00000082988 | Gm5903 | 20 |
| ENSMUSG00000108291 | Gm44292 | 20 | ENSMUSG00000109894 | Gm5904 | 7  |
| ENSMUSG00000103532 | Gm4430  | 20 | ENSMUSG00000110275 | Gm5905 | 12 |
| ENSMUSG00000103009 | Gm4430  | 5  | ENSMUSG00000082491 | Gm5909 | 20 |
| ENSMUSG00000106175 | Gm44313 | 20 | ENSMUSG00000110617 | Gm5910 | 20 |
| ENSMUSG00000106021 | Gm44316 | 20 | ENSMUSG00000081436 | Gm5912 | 12 |
| ENSMUSG00000107749 | Gm44321 | 20 | ENSMUSG00000081111 | Gm5913 | 20 |
| ENSMUSG00000105998 | Gm44324 | 20 | ENSMUSG00000098120 | Gm5914 | 12 |
| ENSMUSG00000107395 | Gm44331 | 20 | ENSMUSG00000080021 | Gm5915 | 20 |
| ENSMUSG00000106670 | Gm44347 | 20 | ENSMUSG00000068200 | Gm5931 | 20 |
| ENSMUSG00000105100 | Gm44349 | 20 | ENSMUSG00000081622 | Gm5937 | 20 |
| ENSMUSG00000106130 | Gm44361 | 20 | ENSMUSG00000083258 | Gm5939 | 20 |
| ENSMUSG00000105415 | Gm44364 | 20 | ENSMUSG00000048592 | Gm5946 | 4  |
| ENSMUSG00000107689 | Gm44386 | 20 | ENSMUSG00000052192 | Gm5963 | 12 |
| ENSMUSG00000104771 | Gm44394 | 20 | ENSMUSG00000048411 | Gm597  | 18 |
| ENSMUSG00000108143 | Gm44414 | 2  | ENSMUSG00000110701 | Gm6013 | 20 |
| ENSMUSG00000108195 | Gm44415 | 20 | ENSMUSG00000081159 | Gm6023 | 20 |
| ENSMUSG00000107436 | Gm44416 | 20 | ENSMUSG00000101875 | Gm6028 | 20 |
| ENSMUSG00000107865 | Gm44417 | 20 | ENSMUSG00000062284 | Gm6030 | 20 |
| ENSMUSG00000107968 | Gm44419 | 20 | ENSMUSG00000114551 | Gm6035 | 20 |
| ENSMUSG00000107451 | Gm44421 | 12 | ENSMUSG00000083736 | Gm6039 | 20 |
| ENSMUSG00000108064 | Gm44423 | 20 | ENSMUSG00000075245 | Gm6043 | 20 |
| ENSMUSG00000107698 | Gm44430 | 20 | ENSMUSG00000057157 | Gm6054 | 20 |
| ENSMUSG00000107932 | Gm44432 | 20 | ENSMUSG00000062081 | Gm6055 | 20 |
| ENSMUSG00000107512 | Gm44433 | 20 | ENSMUSG00000087632 | Gm6058 | 20 |
| ENSMUSG00000107813 | Gm44434 | 20 | ENSMUSG00000093392 | Gm6061 | 20 |
| ENSMUSG00000108005 | Gm44435 | 2  | ENSMUSG00000108772 | Gm6063 | 12 |
| ENSMUSG00000107823 | Gm44436 | 20 | ENSMUSG00000098104 | Gm6085 | 20 |
| ENSMUSG00000108102 | Gm44437 | 3  | ENSMUSG00000115684 | Gm6087 | 9  |
| ENSMUSG00000107947 | Gm44438 | 2  | ENSMUSG00000105422 | Gm6089 | 1  |
| ENSMUSG00000107804 | Gm44439 | 1  | ENSMUSG00000053182 | Gm609  | 20 |

|                    |         |    |                    |        |    |
|--------------------|---------|----|--------------------|--------|----|
| ENSMUSG00000107511 | Gm44440 | 20 | ENSMUSG00000062588 | Gm6104 | 20 |
| ENSMUSG00000107595 | Gm44441 | 20 | ENSMUSG00000113237 | Gm6109 | 12 |
| ENSMUSG00000108640 | Gm44508 | 20 | ENSMUSG00000103922 | Gm6123 | 20 |
| ENSMUSG00000108358 | Gm44509 | 20 | ENSMUSG00000113843 | Gm6129 | 20 |
| ENSMUSG00000108443 | Gm44510 | 20 | ENSMUSG00000084106 | Gm6136 | 12 |
| ENSMUSG00000109385 | Gm44518 | 19 | ENSMUSG00000084304 | Gm6142 | 20 |
| ENSMUSG00000109286 | Gm44541 | 19 | ENSMUSG00000110080 | Gm6145 | 20 |
| ENSMUSG00000109040 | Gm44542 | 18 | ENSMUSG00000105687 | Gm6157 | 20 |
| ENSMUSG00000109379 | Gm44550 | 1  | ENSMUSG00000090381 | Gm6158 | 20 |
| ENSMUSG00000108319 | Gm44552 | 20 | ENSMUSG00000099377 | Gm6159 | 20 |
| ENSMUSG00000108741 | Gm44553 | 20 | ENSMUSG00000074280 | Gm6166 | 20 |
| ENSMUSG00000108973 | Gm44555 | 9  | ENSMUSG00000100078 | Gm6170 | 20 |
| ENSMUSG00000108943 | Gm44559 | 16 | ENSMUSG00000053038 | Gm6180 | 20 |
| ENSMUSG00000108880 | Gm44560 | 3  | ENSMUSG00000113861 | Gm6190 | 20 |
| ENSMUSG00000109362 | Gm44562 | 9  | ENSMUSG00000118220 | Gm6192 | 20 |
| ENSMUSG00000108447 | Gm44567 | 20 | ENSMUSG00000104295 | Gm6197 | 20 |
| ENSMUSG00000109456 | Gm44584 | 9  | ENSMUSG00000105879 | Gm6204 | 12 |
| ENSMUSG00000109430 | Gm44585 | 20 | ENSMUSG00000048949 | Gm6206 | 20 |
| ENSMUSG00000109082 | Gm44586 | 9  | ENSMUSG00000107951 | Gm6210 | 1  |
| ENSMUSG00000109094 | Gm44587 | 9  | ENSMUSG00000091577 | Gm6211 | 18 |
| ENSMUSG00000083626 | Gm4459  | 20 | ENSMUSG00000115196 | Gm6212 | 20 |
| ENSMUSG00000109088 | Gm44593 | 9  | ENSMUSG00000112145 | Gm6218 | 13 |
| ENSMUSG00000108037 | Gm44597 | 20 | ENSMUSG00000083019 | Gm6222 | 9  |
| ENSMUSG00000108630 | Gm44607 | 20 | ENSMUSG00000096647 | Gm6223 | 20 |
| ENSMUSG00000108701 | Gm44616 | 9  | ENSMUSG00000097746 | Gm6225 | 20 |
| ENSMUSG00000090319 | Gm4462  | 20 | ENSMUSG00000086926 | Gm6226 | 20 |
| ENSMUSG00000109570 | Gm44624 | 20 | ENSMUSG00000082996 | Gm6238 | 20 |
| ENSMUSG00000108910 | Gm44625 | 20 | ENSMUSG00000090475 | Gm6245 | 1  |
| ENSMUSG00000108521 | Gm44639 | 2  | ENSMUSG00000117804 | Gm6252 | 12 |
| ENSMUSG00000108867 | Gm44643 | 20 | ENSMUSG00000066538 | Gm6254 | 20 |
| ENSMUSG00000109121 | Gm44644 | 20 | ENSMUSG00000091866 | Gm6257 | 20 |
| ENSMUSG00000108601 | Gm44645 | 20 | ENSMUSG00000080966 | Gm6263 | 1  |
| ENSMUSG00000108607 | Gm44646 | 20 | ENSMUSG00000081281 | Gm6274 | 20 |
| ENSMUSG00000108317 | Gm44663 | 9  | ENSMUSG00000097440 | Gm6277 | 20 |
| ENSMUSG00000108522 | Gm44664 | 9  | ENSMUSG00000116972 | Gm6278 | 20 |
| ENSMUSG00000109539 | Gm44667 | 20 | ENSMUSG00000081703 | Gm6285 | 20 |
| ENSMUSG00000109363 | Gm44668 | 20 | ENSMUSG00000086925 | Gm6286 | 20 |
| ENSMUSG00000108388 | Gm44673 | 5  | ENSMUSG00000071867 | Gm6304 | 20 |
| ENSMUSG00000109370 | Gm44675 | 7  | ENSMUSG00000061833 | Gm6311 | 12 |
| ENSMUSG00000109217 | Gm44676 | 7  | ENSMUSG00000078370 | Gm6316 | 20 |
| ENSMUSG00000109505 | Gm44677 | 7  | ENSMUSG00000083392 | Gm6335 | 20 |
| ENSMUSG00000108920 | Gm44678 | 6  | ENSMUSG00000096964 | Gm6345 | 20 |
| ENSMUSG00000109320 | Gm44679 | 9  | ENSMUSG00000107952 | Gm6352 | 20 |
| ENSMUSG00000109044 | Gm44680 | 9  | ENSMUSG00000114993 | Gm6363 | 20 |
| ENSMUSG00000109256 | Gm44681 | 20 | ENSMUSG00000051548 | Gm6365 | 20 |
| ENSMUSG00000108633 | Gm44694 | 18 | ENSMUSG00000080775 | Gm6368 | 20 |
| ENSMUSG00000108560 | Gm44695 | 20 | ENSMUSG00000107950 | Gm6375 | 20 |
| ENSMUSG00000107875 | Gm44696 | 1  | ENSMUSG00000082675 | Gm6382 | 20 |
| ENSMUSG00000108959 | Gm44697 | 20 | ENSMUSG00000104623 | Gm6394 | 1  |
| ENSMUSG00000109366 | Gm44698 | 1  | ENSMUSG00000091905 | Gm6395 | 20 |
| ENSMUSG00000109314 | Gm44699 | 20 | ENSMUSG00000117962 | Gm6402 | 5  |
| ENSMUSG00000109576 | Gm44704 | 14 | ENSMUSG00000072407 | Gm6419 | 20 |
| ENSMUSG00000108597 | Gm44708 | 20 | ENSMUSG00000114540 | Gm6421 | 5  |
| ENSMUSG00000108721 | Gm44721 | 20 | ENSMUSG00000044757 | Gm6430 | 20 |
| ENSMUSG00000108806 | Gm44729 | 20 | ENSMUSG00000116694 | Gm6440 | 20 |

|                    |         |    |                    |        |    |
|--------------------|---------|----|--------------------|--------|----|
| ENSMUSG00000108543 | Gm44735 | 20 | ENSMUSG00000053740 | Gm6457 | 20 |
| ENSMUSG00000108473 | Gm44739 | 20 | ENSMUSG00000117327 | Gm6467 | 12 |
| ENSMUSG00000109057 | Gm44741 | 20 | ENSMUSG00000095597 | Gm6472 | 12 |
| ENSMUSG00000109332 | Gm44742 | 3  | ENSMUSG00000100261 | Gm6473 | 20 |
| ENSMUSG00000108455 | Gm44745 | 9  | ENSMUSG00000116838 | Gm6475 | 20 |
| ENSMUSG00000108341 | Gm44746 | 7  | ENSMUSG00000111877 | Gm6477 | 20 |
| ENSMUSG00000108750 | Gm44750 | 20 | ENSMUSG00000087153 | Gm6483 | 20 |
| ENSMUSG00000108678 | Gm44758 | 20 | ENSMUSG00000089999 | Gm6485 | 20 |
| ENSMUSG00000109517 | Gm44763 | 20 | ENSMUSG00000090021 | Gm6493 | 18 |
| ENSMUSG00000108802 | Gm44769 | 20 | ENSMUSG00000099998 | Gm6501 | 20 |
| ENSMUSG00000108594 | Gm44770 | 20 | ENSMUSG00000070522 | Gm6505 | 20 |
| ENSMUSG00000109374 | Gm44773 | 20 | ENSMUSG00000082420 | Gm6517 | 20 |
| ENSMUSG00000108955 | Gm44775 | 20 | ENSMUSG00000104862 | Gm6520 | 18 |
| ENSMUSG00000108738 | Gm44777 | 20 | ENSMUSG00000115160 | Gm6532 | 20 |
| ENSMUSG00000108338 | Gm44794 | 20 | ENSMUSG00000115193 | Gm6533 | 20 |
| ENSMUSG00000109359 | Gm44797 | 3  | ENSMUSG00000117049 | Gm6540 | 20 |
| ENSMUSG00000109139 | Gm44798 | 19 | ENSMUSG00000085172 | Gm6542 | 20 |
| ENSMUSG00000109095 | Gm44799 | 19 | ENSMUSG00000106135 | Gm6543 | 20 |
| ENSMUSG00000109418 | Gm44800 | 3  | ENSMUSG00000111118 | Gm6545 | 18 |
| ENSMUSG00000109529 | Gm44801 | 19 | ENSMUSG00000091549 | Gm6548 | 12 |
| ENSMUSG00000108918 | Gm44802 | 3  | ENSMUSG00000117458 | Gm6552 | 20 |
| ENSMUSG00000108790 | Gm44806 | 2  | ENSMUSG00000097806 | Gm6556 | 9  |
| ENSMUSG00000109021 | Gm44812 | 18 | ENSMUSG00000104913 | Gm6560 | 20 |
| ENSMUSG00000107066 | Gm4482  | 20 | ENSMUSG00000051255 | Gm6563 | 20 |
| ENSMUSG00000109154 | Gm44822 | 20 | ENSMUSG00000079224 | Gm6565 | 20 |
| ENSMUSG00000109157 | Gm44829 | 1  | ENSMUSG00000113918 | Gm6566 | 20 |
| ENSMUSG00000108886 | Gm44830 | 1  | ENSMUSG00000083169 | Gm6580 | 20 |
| ENSMUSG00000109575 | Gm44831 | 3  | ENSMUSG00000111446 | Gm6581 | 10 |
| ENSMUSG00000108832 | Gm44832 | 20 | ENSMUSG00000107143 | Gm6598 | 20 |
| ENSMUSG00000108542 | Gm44834 | 20 | ENSMUSG00000091997 | Gm6611 | 20 |
| ENSMUSG00000108557 | Gm44835 | 20 | ENSMUSG00000112550 | Gm6627 | 20 |
| ENSMUSG00000108486 | Gm44836 | 20 | ENSMUSG00000083681 | Gm6640 | 20 |
| ENSMUSG00000108993 | Gm44846 | 9  | ENSMUSG00000100309 | Gm6644 | 12 |
| ENSMUSG00000108890 | Gm44847 | 18 | ENSMUSG00000105645 | Gm6649 | 20 |
| ENSMUSG00000109461 | Gm44848 | 9  | ENSMUSG00000099858 | Gm6652 | 20 |
| ENSMUSG00000109245 | Gm44860 | 20 | ENSMUSG00000084291 | Gm6654 | 12 |
| ENSMUSG00000108897 | Gm44861 | 20 | ENSMUSG00000074171 | Gm6658 | 20 |
| ENSMUSG00000109131 | Gm44862 | 20 | ENSMUSG00000117929 | Gm6663 | 20 |
| ENSMUSG00000109416 | Gm44863 | 20 | ENSMUSG00000107713 | Gm6681 | 20 |
| ENSMUSG00000108376 | Gm44874 | 9  | ENSMUSG00000091269 | Gm6682 | 4  |
| ENSMUSG00000108477 | Gm44878 | 20 | ENSMUSG00000032889 | Gm6685 | 20 |
| ENSMUSG00000108572 | Gm44883 | 20 | ENSMUSG00000116958 | Gm6705 | 20 |
| ENSMUSG00000109555 | Gm44891 | 20 | ENSMUSG00000078887 | Gm6710 | 20 |
| ENSMUSG00000108756 | Gm44894 | 20 | ENSMUSG00000072761 | Gm6712 | 20 |
| ENSMUSG00000108474 | Gm44895 | 20 | ENSMUSG00000111609 | Gm6713 | 1  |
| ENSMUSG00000108665 | Gm44897 | 20 | ENSMUSG00000112318 | Gm6721 | 1  |
| ENSMUSG00000108325 | Gm44898 | 20 | ENSMUSG00000091408 | Gm6728 | 12 |
| ENSMUSG00000109008 | Gm44899 | 20 | ENSMUSG00000084329 | Gm6733 | 20 |
| ENSMUSG00000108954 | Gm44901 | 20 | ENSMUSG00000071414 | Gm6736 | 20 |
| ENSMUSG00000109216 | Gm44907 | 20 | ENSMUSG00000043346 | Gm6741 | 20 |
| ENSMUSG00000089840 | Gm4491  | 1  | ENSMUSG00000105866 | Gm6745 | 20 |
| ENSMUSG00000108852 | Gm44911 | 20 | ENSMUSG00000081118 | Gm6758 | 20 |
| ENSMUSG00000109051 | Gm44913 | 20 | ENSMUSG00000081453 | Gm6767 | 12 |
| ENSMUSG00000108984 | Gm44916 | 20 | ENSMUSG00000021908 | Gm6768 | 20 |
| ENSMUSG00000108983 | Gm44926 | 9  | ENSMUSG00000047509 | Gm6776 | 20 |

|                    |         |    |                    |        |    |
|--------------------|---------|----|--------------------|--------|----|
| ENSMUSG00000108893 | Gm44927 | 20 | ENSMUSG00000035129 | Gm6781 | 20 |
| ENSMUSG00000108643 | Gm44931 | 20 | ENSMUSG00000117875 | Gm6789 | 20 |
| ENSMUSG00000109393 | Gm44936 | 20 | ENSMUSG00000092086 | Gm6793 | 20 |
| ENSMUSG00000109434 | Gm44937 | 20 | ENSMUSG00000057605 | Gm6807 | 18 |
| ENSMUSG00000108655 | Gm44949 | 20 | ENSMUSG00000117972 | Gm6813 | 20 |
| ENSMUSG00000108350 | Gm44950 | 20 | ENSMUSG00000109488 | Gm6828 | 20 |
| ENSMUSG00000108365 | Gm44951 | 12 | ENSMUSG00000083670 | Gm6829 | 20 |
| ENSMUSG00000109109 | Gm44953 | 20 | ENSMUSG00000056836 | Gm6851 | 20 |
| ENSMUSG00000109205 | Gm44954 | 20 | ENSMUSG00000043483 | Gm6863 | 20 |
| ENSMUSG00000107497 | Gm44957 | 20 | ENSMUSG00000083557 | Gm6877 | 20 |
| ENSMUSG00000109302 | Gm44967 | 9  | ENSMUSG00000117515 | Gm6883 | 20 |
| ENSMUSG00000109073 | Gm44975 | 20 | ENSMUSG00000093826 | Gm6900 | 20 |
| ENSMUSG00000108586 | Gm44976 | 20 | ENSMUSG00000090074 | Gm6921 | 20 |
| ENSMUSG00000108450 | Gm44977 | 20 | ENSMUSG00000103753 | Gm6934 | 9  |
| ENSMUSG00000109399 | Gm44982 | 20 | ENSMUSG00000117856 | Gm6937 | 20 |
| ENSMUSG00000108573 | Gm44986 | 20 | ENSMUSG00000082922 | Gm6939 | 20 |
| ENSMUSG00000108511 | Gm44987 | 20 | ENSMUSG00000098141 | Gm6944 | 20 |
| ENSMUSG00000109199 | Gm44996 | 12 | ENSMUSG00000066553 | Gm6969 | 20 |
| ENSMUSG00000108446 | Gm44997 | 20 | ENSMUSG00000091230 | Gm6970 | 20 |
| ENSMUSG00000109128 | Gm45022 | 20 | ENSMUSG00000117673 | Gm6974 | 20 |
| ENSMUSG00000109010 | Gm45027 | 20 | ENSMUSG00000098076 | Gm6981 | 1  |
| ENSMUSG00000108500 | Gm45033 | 20 | ENSMUSG00000111671 | Gm6983 | 10 |
| ENSMUSG00000109317 | Gm45041 | 20 | ENSMUSG00000113198 | Gm6988 | 10 |
| ENSMUSG00000109337 | Gm45047 | 20 | ENSMUSG00000115743 | Gm7004 | 20 |
| ENSMUSG00000108368 | Gm45053 | 19 | ENSMUSG00000035983 | Gm7008 | 20 |
| ENSMUSG00000109438 | Gm45073 | 18 | ENSMUSG00000067121 | Gm7027 | 7  |
| ENSMUSG00000109568 | Gm45074 | 9  | ENSMUSG00000113473 | Gm7045 | 20 |
| ENSMUSG00000108384 | Gm45082 | 20 | ENSMUSG00000113637 | Gm7049 | 20 |
| ENSMUSG00000109045 | Gm45084 | 1  | ENSMUSG00000114217 | Gm7054 | 20 |
| ENSMUSG00000109090 | Gm45088 | 20 | ENSMUSG00000117468 | Gm7059 | 20 |
| ENSMUSG00000108753 | Gm45094 | 20 | ENSMUSG00000082776 | Gm7061 | 20 |
| ENSMUSG00000108871 | Gm45102 | 1  | ENSMUSG00000117284 | Gm7072 | 20 |
| ENSMUSG00000109209 | Gm45104 | 20 | ENSMUSG00000096375 | Gm7094 | 20 |
| ENSMUSG00000108465 | Gm45110 | 20 | ENSMUSG00000060647 | Gm7099 | 20 |
| ENSMUSG00000109397 | Gm45117 | 20 | ENSMUSG00000118345 | Gm7105 | 20 |
| ENSMUSG00000109038 | Gm45120 | 20 | ENSMUSG00000115280 | Gm7107 | 20 |
| ENSMUSG00000108372 | Gm45124 | 20 | ENSMUSG00000100481 | Gm7114 | 20 |
| ENSMUSG00000108953 | Gm45129 | 9  | ENSMUSG00000080914 | Gm7129 | 20 |
| ENSMUSG00000109481 | Gm45130 | 9  | ENSMUSG00000114184 | Gm7143 | 20 |
| ENSMUSG00000109191 | Gm45131 | 20 | ENSMUSG00000099843 | Gm7160 | 20 |
| ENSMUSG00000109274 | Gm45133 | 20 | ENSMUSG00000112926 | Gm7172 | 20 |
| ENSMUSG00000109206 | Gm45137 | 6  | ENSMUSG00000083774 | Gm7180 | 20 |
| ENSMUSG00000109165 | Gm45148 | 20 | ENSMUSG00000106813 | Gm7181 | 20 |
| ENSMUSG00000108736 | Gm45151 | 20 | ENSMUSG00000082475 | Gm7206 | 20 |
| ENSMUSG00000108693 | Gm45153 | 20 | ENSMUSG00000115662 | Gm7232 | 20 |
| ENSMUSG00000109125 | Gm45159 | 2  | ENSMUSG00000094151 | Gm7233 | 20 |
| ENSMUSG00000109419 | Gm45163 | 20 | ENSMUSG00000113626 | Gm7240 | 9  |
| ENSMUSG00000109413 | Gm45165 | 18 | ENSMUSG00000091003 | Gm7244 | 20 |
| ENSMUSG00000108776 | Gm45169 | 20 | ENSMUSG00000069236 | Gm7251 | 20 |
| ENSMUSG00000109422 | Gm45174 | 20 | ENSMUSG00000114135 | Gm7252 | 20 |
| ENSMUSG00000109239 | Gm45176 | 6  | ENSMUSG00000117060 | Gm7253 | 20 |
| ENSMUSG00000108819 | Gm45177 | 6  | ENSMUSG00000102573 | Gm7265 | 20 |
| ENSMUSG00000109562 | Gm45178 | 6  | ENSMUSG00000073532 | Gm7276 | 20 |
| ENSMUSG00000108956 | Gm45179 | 7  | ENSMUSG00000080950 | Gm7278 | 20 |
| ENSMUSG00000109387 | Gm45182 | 6  | ENSMUSG00000105408 | Gm7285 | 20 |



|                    |         |    |                    |        |    |
|--------------------|---------|----|--------------------|--------|----|
| ENSMUSG00000109353 | Gm45183 | 2  | ENSMUSG00000104222 | Gm7292 | 20 |
| ENSMUSG00000108752 | Gm45191 | 9  | ENSMUSG00000111162 | Gm7293 | 20 |
| ENSMUSG00000109257 | Gm45200 | 8  | ENSMUSG00000081113 | Gm7308 | 20 |
| ENSMUSG00000109031 | Gm45201 | 9  | ENSMUSG00000049235 | Gm7324 | 19 |
| ENSMUSG00000108494 | Gm45203 | 9  | ENSMUSG00000050900 | Gm7327 | 20 |
| ENSMUSG00000108808 | Gm45204 | 20 | ENSMUSG00000110043 | Gm7328 | 4  |
| ENSMUSG00000108353 | Gm45205 | 20 | ENSMUSG00000059461 | Gm7331 | 12 |
| ENSMUSG00000108389 | Gm45206 | 20 | ENSMUSG00000080875 | Gm7332 | 20 |
| ENSMUSG00000108584 | Gm45216 | 12 | ENSMUSG00000044645 | Gm7334 | 20 |
| ENSMUSG00000109279 | Gm45220 | 20 | ENSMUSG00000067189 | Gm7335 | 20 |
| ENSMUSG00000109005 | Gm45221 | 20 | ENSMUSG00000059645 | Gm7361 | 20 |
| ENSMUSG00000109498 | Gm45222 | 20 | ENSMUSG00000083344 | Gm7363 | 20 |
| ENSMUSG00000109429 | Gm45223 | 2  | ENSMUSG00000047370 | Gm7367 | 20 |
| ENSMUSG00000109448 | Gm45224 | 12 | ENSMUSG00000097657 | Gm7389 | 1  |
| ENSMUSG00000090257 | Gm4524  | 20 | ENSMUSG00000110644 | Gm7390 | 9  |
| ENSMUSG00000110317 | Gm45250 | 18 | ENSMUSG00000112908 | Gm7392 | 20 |
| ENSMUSG00000110084 | Gm45257 | 20 | ENSMUSG00000091941 | Gm7399 | 16 |
| ENSMUSG00000110269 | Gm45258 | 20 | ENSMUSG00000089975 | Gm7420 | 9  |
| ENSMUSG00000109942 | Gm45262 | 20 | ENSMUSG00000082260 | Gm7429 | 18 |
| ENSMUSG00000110342 | Gm45263 | 20 | ENSMUSG00000109241 | Gm7434 | 20 |
| ENSMUSG00000109927 | Gm45264 | 20 | ENSMUSG00000111662 | Gm7435 | 20 |
| ENSMUSG00000109725 | Gm45265 | 6  | ENSMUSG00000113258 | Gm7446 | 20 |
| ENSMUSG00000109787 | Gm45286 | 20 | ENSMUSG00000109489 | Gm7451 | 20 |
| ENSMUSG00000109642 | Gm45289 | 20 | ENSMUSG00000107310 | Gm7452 | 18 |
| ENSMUSG00000110079 | Gm45292 | 9  | ENSMUSG00000115730 | Gm7459 | 20 |
| ENSMUSG00000110325 | Gm45293 | 12 | ENSMUSG00000117425 | Gm7464 | 20 |
| ENSMUSG00000110068 | Gm45294 | 20 | ENSMUSG00000098449 | Gm7467 | 20 |
| ENSMUSG00000109775 | Gm45297 | 7  | ENSMUSG00000112605 | Gm7476 | 5  |
| ENSMUSG00000110329 | Gm45304 | 20 | ENSMUSG00000039617 | Gm7488 | 1  |
| ENSMUSG00000110087 | Gm45309 | 20 | ENSMUSG00000066693 | Gm7493 | 10 |
| ENSMUSG00000110272 | Gm45310 | 20 | ENSMUSG00000098142 | Gm7507 | 20 |
| ENSMUSG00000110316 | Gm45311 | 20 | ENSMUSG00000113137 | Gm7511 | 20 |
| ENSMUSG00000109925 | Gm45315 | 20 | ENSMUSG00000115700 | Gm7517 | 20 |
| ENSMUSG00000110375 | Gm45323 | 20 | ENSMUSG00000117503 | Gm7527 | 20 |
| ENSMUSG00000109783 | Gm45338 | 20 | ENSMUSG00000090957 | Gm7535 | 20 |
| ENSMUSG00000109838 | Gm45341 | 20 | ENSMUSG00000057036 | Gm7536 | 12 |
| ENSMUSG00000109679 | Gm45342 | 3  | ENSMUSG00000115738 | Gm7543 | 20 |
| ENSMUSG00000110088 | Gm45343 | 20 | ENSMUSG00000101784 | Gm7553 | 20 |
| ENSMUSG00000110099 | Gm45344 | 12 | ENSMUSG00000114349 | Gm7591 | 20 |
| ENSMUSG00000109957 | Gm45353 | 1  | ENSMUSG00000087390 | Gm7598 | 20 |
| ENSMUSG00000108689 | Gm45354 | 20 | ENSMUSG00000109933 | Gm7600 | 20 |
| ENSMUSG00000110162 | Gm45356 | 20 | ENSMUSG00000095288 | Gm7618 | 9  |
| ENSMUSG00000109585 | Gm45358 | 20 | ENSMUSG00000118283 | Gm7623 | 20 |
| ENSMUSG00000109728 | Gm45359 | 20 | ENSMUSG00000025644 | Gm7628 | 20 |
| ENSMUSG00000109852 | Gm45360 | 20 | ENSMUSG00000090667 | Gm765  | 20 |
| ENSMUSG00000110377 | Gm45363 | 20 | ENSMUSG00000097991 | Gm7656 | 18 |
| ENSMUSG00000110326 | Gm45378 | 20 | ENSMUSG00000082935 | Gm7658 | 20 |
| ENSMUSG00000110360 | Gm45380 | 9  | ENSMUSG00000113428 | Gm7664 | 20 |
| ENSMUSG00000109940 | Gm45399 | 20 | ENSMUSG00000067547 | Gm7666 | 20 |
| ENSMUSG00000092072 | Gm4540  | 12 | ENSMUSG00000097086 | Gm7672 | 20 |
| ENSMUSG00000109873 | Gm45407 | 9  | ENSMUSG00000102752 | Gm7694 | 20 |
| ENSMUSG00000109640 | Gm45413 | 12 | ENSMUSG00000091363 | Gm7701 | 20 |
| ENSMUSG00000110400 | Gm45416 | 1  | ENSMUSG00000046636 | Gm7729 | 20 |
| ENSMUSG00000110341 | Gm45424 | 20 | ENSMUSG00000110545 | Gm7730 | 20 |
| ENSMUSG00000109792 | Gm45426 | 20 | ENSMUSG00000105189 | Gm7774 | 20 |

|                    |         |    |                    |        |    |
|--------------------|---------|----|--------------------|--------|----|
| ENSMUSG00000109956 | Gm45428 | 20 | ENSMUSG00000083064 | Gm7785 | 20 |
| ENSMUSG00000110020 | Gm45441 | 9  | ENSMUSG00000091460 | Gm7808 | 12 |
| ENSMUSG00000109780 | Gm45447 | 5  | ENSMUSG00000106201 | Gm7815 | 20 |
| ENSMUSG00000109741 | Gm45455 | 20 | ENSMUSG00000083261 | Gm7816 | 20 |
| ENSMUSG00000110411 | Gm45457 | 20 | ENSMUSG00000117234 | Gm7818 | 20 |
| ENSMUSG00000109744 | Gm45461 | 9  | ENSMUSG00000106917 | Gm7832 | 20 |
| ENSMUSG00000109727 | Gm45464 | 20 | ENSMUSG00000086240 | Gm7846 | 20 |
| ENSMUSG00000109674 | Gm45470 | 20 | ENSMUSG00000085720 | Gm7854 | 1  |
| ENSMUSG00000108394 | Gm45477 | 3  | ENSMUSG00000116089 | Gm7859 | 20 |
| ENSMUSG00000109693 | Gm45483 | 9  | ENSMUSG00000046580 | Gm7862 | 20 |
| ENSMUSG00000110046 | Gm45484 | 20 | ENSMUSG00000100351 | Gm7867 | 20 |
| ENSMUSG00000109784 | Gm45493 | 5  | ENSMUSG00000113600 | Gm7868 | 20 |
| ENSMUSG00000106981 | Gm45495 | 20 | ENSMUSG00000044211 | Gm7887 | 20 |
| ENSMUSG00000110187 | Gm45496 | 20 | ENSMUSG00000100347 | Gm7895 | 20 |
| ENSMUSG00000110159 | Gm45501 | 20 | ENSMUSG00000103823 | Gm7899 | 10 |
| ENSMUSG00000110308 | Gm45516 | 7  | ENSMUSG00000101431 | Gm7901 | 16 |
| ENSMUSG00000109622 | Gm45517 | 9  | ENSMUSG00000106067 | Gm7902 | 20 |
| ENSMUSG00000109982 | Gm45520 | 20 | ENSMUSG00000115602 | Gm7908 | 20 |
| ENSMUSG00000109618 | Gm45527 | 20 | ENSMUSG00000098068 | Gm7909 | 20 |
| ENSMUSG00000110167 | Gm45532 | 20 | ENSMUSG00000117345 | Gm7926 | 20 |
| ENSMUSG00000110296 | Gm45533 | 12 | ENSMUSG00000067321 | Gm7931 | 20 |
| ENSMUSG00000110405 | Gm45534 | 20 | ENSMUSG00000108084 | Gm7932 | 19 |
| ENSMUSG00000109606 | Gm45537 | 20 | ENSMUSG00000075609 | Gm7935 | 20 |
| ENSMUSG00000110397 | Gm45540 | 20 | ENSMUSG00000055771 | Gm7936 | 20 |
| ENSMUSG00000110279 | Gm45552 | 20 | ENSMUSG00000114999 | Gm7962 | 20 |
| ENSMUSG00000109652 | Gm45555 | 2  | ENSMUSG00000063902 | Gm7964 | 20 |
| ENSMUSG00000110160 | Gm45560 | 20 | ENSMUSG00000100009 | Gm7967 | 20 |
| ENSMUSG00000110038 | Gm45570 | 9  | ENSMUSG00000115144 | Gm7968 | 20 |
| ENSMUSG00000110137 | Gm45577 | 20 | ENSMUSG00000109032 | Gm7972 | 1  |
| ENSMUSG00000110389 | Gm45579 | 20 | ENSMUSG00000049891 | Gm7984 | 20 |
| ENSMUSG00000109460 | Gm45591 | 19 | ENSMUSG00000107092 | Gm7993 | 20 |
| ENSMUSG00000109810 | Gm45592 | 20 | ENSMUSG00000102493 | Gm8010 | 1  |
| ENSMUSG00000109608 | Gm45597 | 20 | ENSMUSG00000094281 | Gm8034 | 20 |
| ENSMUSG00000109945 | Gm45601 | 9  | ENSMUSG00000069986 | Gm8054 | 20 |
| ENSMUSG00000109829 | Gm45605 | 20 | ENSMUSG00000096171 | Gm8055 | 20 |
| ENSMUSG00000109715 | Gm45606 | 1  | ENSMUSG00000106237 | Gm8066 | 9  |
| ENSMUSG00000109877 | Gm45609 | 20 | ENSMUSG00000105143 | Gm8069 | 9  |
| ENSMUSG00000110070 | Gm45619 | 20 | ENSMUSG00000097848 | Gm807  | 20 |
| ENSMUSG00000110086 | Gm45623 | 16 | ENSMUSG00000073073 | Gm8098 | 9  |
| ENSMUSG00000110010 | Gm45629 | 20 | ENSMUSG00000105787 | Gm8099 | 20 |
| ENSMUSG00000109638 | Gm45630 | 20 | ENSMUSG00000059422 | Gm8116 | 20 |
| ENSMUSG00000110243 | Gm45631 | 20 | ENSMUSG00000051116 | Gm8121 | 19 |
| ENSMUSG00000110077 | Gm45632 | 20 | ENSMUSG00000059159 | Gm8129 | 20 |
| ENSMUSG00000110227 | Gm45634 | 13 | ENSMUSG00000116637 | Gm8130 | 20 |
| ENSMUSG00000109791 | Gm45636 | 13 | ENSMUSG00000100025 | Gm8141 | 20 |
| ENSMUSG00000109812 | Gm45640 | 20 | ENSMUSG00000103260 | Gm8146 | 1  |
| ENSMUSG00000109863 | Gm45643 | 9  | ENSMUSG00000100534 | Gm816  | 20 |
| ENSMUSG00000109636 | Gm45644 | 20 | ENSMUSG00000112381 | Gm8170 | 10 |
| ENSMUSG00000109849 | Gm45645 | 20 | ENSMUSG00000082926 | Gm8172 | 12 |
| ENSMUSG00000110263 | Gm45652 | 20 | ENSMUSG00000100555 | Gm8173 | 1  |
| ENSMUSG00000109828 | Gm45662 | 20 | ENSMUSG00000048188 | Gm8181 | 20 |
| ENSMUSG00000109735 | Gm45667 | 20 | ENSMUSG00000117877 | Gm8184 | 20 |
| ENSMUSG00000109917 | Gm45671 | 9  | ENSMUSG00000090119 | Gm8185 | 20 |
| ENSMUSG00000110529 | Gm45694 | 9  | ENSMUSG00000049124 | Gm8186 | 20 |
| ENSMUSG00000110564 | Gm45697 | 20 | ENSMUSG00000112163 | Gm8188 | 20 |

|                    |         |    |                    |        |    |
|--------------------|---------|----|--------------------|--------|----|
| ENSMUSG00000109428 | Gm45698 | 20 | ENSMUSG00000101878 | Gm8203 | 9  |
| ENSMUSG00000110483 | Gm45702 | 1  | ENSMUSG00000084303 | Gm8216 | 9  |
| ENSMUSG00000110696 | Gm45706 | 3  | ENSMUSG00000099927 | Gm8226 | 20 |
| ENSMUSG00000110534 | Gm45708 | 1  | ENSMUSG00000099779 | Gm8228 | 20 |
| ENSMUSG00000110706 | Gm45709 | 20 | ENSMUSG00000105021 | Gm8234 | 20 |
| ENSMUSG00000110344 | Gm45716 | 20 | ENSMUSG00000090707 | Gm8237 | 20 |
| ENSMUSG00000109390 | Gm45718 | 20 | ENSMUSG00000102827 | Gm8242 | 20 |
| ENSMUSG00000108940 | Gm45719 | 20 | ENSMUSG00000116861 | Gm8253 | 12 |
| ENSMUSG00000110546 | Gm45734 | 20 | ENSMUSG00000048334 | Gm8258 | 20 |
| ENSMUSG00000109231 | Gm45737 | 20 | ENSMUSG00000081718 | Gm8261 | 20 |
| ENSMUSG00000108101 | Gm45738 | 20 | ENSMUSG00000102550 | Gm8276 | 20 |
| ENSMUSG00000110540 | Gm45743 | 20 | ENSMUSG00000095681 | Gm8281 | 20 |
| ENSMUSG00000098240 | Gm4575  | 20 | ENSMUSG00000110361 | Gm8291 | 20 |
| ENSMUSG00000110711 | Gm45760 | 20 | ENSMUSG00000100215 | Gm8292 | 20 |
| ENSMUSG00000110556 | Gm45762 | 20 | ENSMUSG00000098222 | Gm8318 | 20 |
| ENSMUSG00000110702 | Gm45767 | 20 | ENSMUSG00000108528 | Gm8319 | 20 |
| ENSMUSG00000107838 | Gm45769 | 20 | ENSMUSG00000027694 | Gm8325 | 20 |
| ENSMUSG00000110588 | Gm45774 | 20 | ENSMUSG00000101262 | Gm8326 | 20 |
| ENSMUSG00000110558 | Gm45779 | 20 | ENSMUSG00000100033 | Gm8337 | 20 |
| ENSMUSG00000110136 | Gm45785 | 20 | ENSMUSG00000093798 | Gm8355 | 20 |
| ENSMUSG00000110672 | Gm45786 | 20 | ENSMUSG00000090722 | Gm8378 | 20 |
| ENSMUSG00000109150 | Gm45793 | 20 | ENSMUSG00000050490 | Gm8394 | 20 |
| ENSMUSG00000110504 | Gm45797 | 20 | ENSMUSG00000043889 | Gm8399 | 1  |
| ENSMUSG00000110442 | Gm45804 | 20 | ENSMUSG00000103964 | Gm8407 | 20 |
| ENSMUSG00000108991 | Gm45807 | 20 | ENSMUSG00000055093 | Gm8430 | 12 |
| ENSMUSG00000109708 | Gm45809 | 3  | ENSMUSG00000118295 | Gm8437 | 20 |
| ENSMUSG00000110471 | Gm45823 | 20 | ENSMUSG00000099471 | Gm8451 | 20 |
| ENSMUSG00000108526 | Gm45828 | 9  | ENSMUSG00000106028 | Gm8493 | 20 |
| ENSMUSG00000110465 | Gm45832 | 20 | ENSMUSG00000094090 | Gm8494 | 20 |
| ENSMUSG00000110673 | Gm45833 | 20 | ENSMUSG00000049477 | Gm8508 | 20 |
| ENSMUSG00000108825 | Gm45838 | 20 | ENSMUSG00000114765 | Gm8514 | 20 |
| ENSMUSG00000110105 | Gm45844 | 20 | ENSMUSG00000103206 | Gm8515 | 20 |
| ENSMUSG00000109427 | Gm45845 | 20 | ENSMUSG00000115312 | Gm8518 | 20 |
| ENSMUSG00000109814 | Gm45847 | 20 | ENSMUSG00000106294 | Gm8539 | 20 |
| ENSMUSG00000110635 | Gm45853 | 20 | ENSMUSG00000090535 | Gm8540 | 20 |
| ENSMUSG00000110598 | Gm45854 | 20 | ENSMUSG00000111684 | Gm8543 | 20 |
| ENSMUSG00000110686 | Gm45855 | 12 | ENSMUSG00000094463 | Gm8546 | 20 |
| ENSMUSG00000109243 | Gm45867 | 20 | ENSMUSG00000047905 | Gm8566 | 20 |
| ENSMUSG00000110390 | Gm45869 | 20 | ENSMUSG00000024437 | Gm8615 | 20 |
| ENSMUSG00000110277 | Gm45871 | 20 | ENSMUSG00000083705 | Gm8624 | 12 |
| ENSMUSG00000110142 | Gm45872 | 12 | ENSMUSG00000048709 | Gm8666 | 20 |
| ENSMUSG00000110499 | Gm45873 | 19 | ENSMUSG00000050157 | Gm867  | 20 |
| ENSMUSG00000110486 | Gm45877 | 20 | ENSMUSG00000083586 | Gm8688 | 18 |
| ENSMUSG00000110366 | Gm45885 | 20 | ENSMUSG00000113743 | Gm8712 | 20 |
| ENSMUSG00000110615 | Gm45890 | 20 | ENSMUSG00000117935 | Gm8717 | 20 |
| ENSMUSG00000110525 | Gm45893 | 16 | ENSMUSG00000081164 | Gm8722 | 20 |
| ENSMUSG00000110440 | Gm45894 | 20 | ENSMUSG00000063696 | Gm8730 | 20 |
| ENSMUSG00000051396 | Gm45902 | 20 | ENSMUSG00000092540 | Gm8738 | 19 |
| ENSMUSG00000082394 | Gm4596  | 20 | ENSMUSG00000091655 | Gm8741 | 20 |
| ENSMUSG00000116529 | Gm4600  | 12 | ENSMUSG00000098238 | Gm8756 | 20 |
| ENSMUSG00000078592 | Gm4609  | 12 | ENSMUSG00000104360 | Gm8762 | 20 |
| ENSMUSG00000111061 | Gm46102 | 20 | ENSMUSG00000091223 | Gm8775 | 20 |
| ENSMUSG00000111443 | Gm46123 | 20 | ENSMUSG00000094388 | Gm8783 | 20 |
| ENSMUSG00000111163 | Gm46136 | 20 | ENSMUSG00000113936 | Gm8784 | 20 |
| ENSMUSG00000096544 | Gm4617  | 12 | ENSMUSG00000103034 | Gm8797 | 12 |

|                    |         |    |                    |        |    |
|--------------------|---------|----|--------------------|--------|----|
| ENSMUSG00000112146 | Gm46210 | 20 | ENSMUSG00000083367 | Gm8806 | 18 |
| ENSMUSG00000110830 | Gm46218 | 20 | ENSMUSG00000085625 | Gm8813 | 20 |
| ENSMUSG00000112994 | Gm46312 | 20 | ENSMUSG00000082319 | Gm8822 | 18 |
| ENSMUSG00000113959 | Gm46339 | 20 | ENSMUSG00000098028 | Gm8824 | 20 |
| ENSMUSG00000112606 | Gm46364 | 20 | ENSMUSG00000104181 | Gm8850 | 20 |
| ENSMUSG00000113427 | Gm46378 | 20 | ENSMUSG00000084029 | Gm8855 | 20 |
| ENSMUSG00000113440 | Gm46404 | 20 | ENSMUSG00000081892 | Gm8864 | 20 |
| ENSMUSG00000114851 | Gm46409 | 20 | ENSMUSG00000060680 | Gm8894 | 20 |
| ENSMUSG00000114903 | Gm46419 | 2  | ENSMUSG00000111847 | Gm8899 | 20 |
| ENSMUSG00000113204 | Gm46430 | 20 | ENSMUSG00000092464 | Gm8902 | 20 |
| ENSMUSG00000114827 | Gm46432 | 20 | ENSMUSG00000098187 | Gm8927 | 20 |
| ENSMUSG00000113379 | Gm46436 | 20 | ENSMUSG00000117810 | Gm8934 | 12 |
| ENSMUSG00000114516 | Gm46440 | 20 | ENSMUSG00000111964 | Gm8942 | 2  |
| ENSMUSG00000115813 | Gm46447 | 20 | ENSMUSG00000112099 | Gm8960 | 6  |
| ENSMUSG00000098111 | Gm4654  | 20 | ENSMUSG00000114321 | Gm8971 | 20 |
| ENSMUSG00000116845 | Gm46546 | 20 | ENSMUSG00000114500 | Gm8983 | 20 |
| ENSMUSG00000116581 | Gm46565 | 20 | ENSMUSG00000114607 | Gm8990 | 20 |
| ENSMUSG00000087636 | Gm4660  | 20 | ENSMUSG00000059179 | Gm8991 | 12 |
| ENSMUSG00000118012 | Gm46620 | 20 | ENSMUSG00000063286 | Gm8995 | 20 |
| ENSMUSG00000117356 | Gm46633 | 20 | ENSMUSG00000080824 | Gm9001 | 20 |
| ENSMUSG00000117713 | Gm46637 | 20 | ENSMUSG00000087286 | Gm9013 | 20 |
| ENSMUSG00000097750 | Gm4673  | 1  | ENSMUSG00000089685 | Gm9017 | 20 |
| ENSMUSG00000115146 | Gm4681  | 20 | ENSMUSG00000112614 | Gm9030 | 20 |
| ENSMUSG00000097979 | Gm4691  | 20 | ENSMUSG00000114409 | Gm9042 | 20 |
| ENSMUSG00000112836 | Gm47006 | 12 | ENSMUSG00000105156 | Gm9057 | 20 |
| ENSMUSG00000113981 | Gm47011 | 5  | ENSMUSG00000117939 | Gm9067 | 20 |
| ENSMUSG00000112340 | Gm47016 | 9  | ENSMUSG00000098138 | Gm9081 | 20 |
| ENSMUSG00000112295 | Gm47017 | 20 | ENSMUSG00000061242 | Gm9104 | 20 |
| ENSMUSG00000112103 | Gm47018 | 20 | ENSMUSG00000081370 | Gm9105 | 20 |
| ENSMUSG00000112142 | Gm47022 | 20 | ENSMUSG00000112825 | Gm9118 | 20 |
| ENSMUSG00000111935 | Gm47023 | 20 | ENSMUSG00000104218 | Gm9134 | 20 |
| ENSMUSG00000112287 | Gm47024 | 2  | ENSMUSG00000073233 | Gm9144 | 20 |
| ENSMUSG00000112106 | Gm47026 | 20 | ENSMUSG00000109326 | Gm9165 | 19 |
| ENSMUSG00000111931 | Gm47032 | 2  | ENSMUSG00000098198 | Gm9169 | 20 |
| ENSMUSG00000111990 | Gm47033 | 1  | ENSMUSG00000112850 | Gm9176 | 20 |
| ENSMUSG00000093686 | Gm4705  | 20 | ENSMUSG00000083595 | Gm9200 | 20 |
| ENSMUSG00000111498 | Gm47059 | 9  | ENSMUSG00000110562 | Gm9204 | 20 |
| ENSMUSG00000091831 | Gm4707  | 2  | ENSMUSG00000104642 | Gm9207 | 20 |
| ENSMUSG00000114493 | Gm47071 | 20 | ENSMUSG00000058050 | Gm9234 | 12 |
| ENSMUSG00000114169 | Gm47075 | 10 | ENSMUSG00000105599 | Gm9238 | 20 |
| ENSMUSG00000110790 | Gm47079 | 20 | ENSMUSG00000115505 | Gm9247 | 20 |
| ENSMUSG00000117187 | Gm4708  | 20 | ENSMUSG00000105928 | Gm9256 | 20 |
| ENSMUSG00000111212 | Gm47087 | 2  | ENSMUSG00000118377 | Gm9276 | 20 |
| ENSMUSG00000113076 | Gm47088 | 9  | ENSMUSG00000044609 | Gm9294 | 20 |
| ENSMUSG00000111223 | Gm47089 | 20 | ENSMUSG00000108381 | Gm9299 | 20 |
| ENSMUSG00000110738 | Gm47092 | 20 | ENSMUSG00000100865 | Gm9320 | 20 |
| ENSMUSG00000111844 | Gm47097 | 2  | ENSMUSG00000108702 | Gm9333 | 20 |
| ENSMUSG00000112838 | Gm47098 | 20 | ENSMUSG00000110126 | Gm9347 | 20 |
| ENSMUSG00000111341 | Gm47111 | 20 | ENSMUSG00000106619 | Gm9353 | 20 |
| ENSMUSG00000111079 | Gm47112 | 20 | ENSMUSG00000109059 | Gm9354 | 20 |
| ENSMUSG00000111465 | Gm47113 | 20 | ENSMUSG00000080848 | Gm9385 | 12 |
| ENSMUSG00000114244 | Gm47119 | 20 | ENSMUSG00000074236 | Gm9387 | 20 |
| ENSMUSG00000111434 | Gm47121 | 12 | ENSMUSG00000087298 | Gm9392 | 20 |
| ENSMUSG00000111003 | Gm47122 | 8  | ENSMUSG00000063328 | Gm9396 | 20 |
| ENSMUSG00000113610 | Gm47132 | 20 | ENSMUSG00000106499 | Gm9403 | 1  |

|                    |         |    |                    |        |    |
|--------------------|---------|----|--------------------|--------|----|
| ENSMUSG0000011837  | Gm47135 | 18 | ENSMUSG00000104241 | Gm9442 | 20 |
| ENSMUSG00000113003 | Gm47138 | 20 | ENSMUSG00000105006 | Gm9484 | 20 |
| ENSMUSG00000113106 | Gm47139 | 3  | ENSMUSG00000111530 | Gm9487 | 20 |
| ENSMUSG00000111325 | Gm47140 | 20 | ENSMUSG00000044424 | Gm9493 | 12 |
| ENSMUSG00000114019 | Gm47155 | 9  | ENSMUSG00000113389 | Gm9512 | 3  |
| ENSMUSG00000111490 | Gm47159 | 20 | ENSMUSG00000117252 | Gm9514 | 20 |
| ENSMUSG00000111977 | Gm47163 | 20 | ENSMUSG00000104103 | Gm9517 | 20 |
| ENSMUSG00000113067 | Gm47166 | 20 | ENSMUSG00000098021 | Gm9522 | 20 |
| ENSMUSG00000111340 | Gm47171 | 20 | ENSMUSG00000106181 | Gm9523 | 20 |
| ENSMUSG00000111343 | Gm47175 | 20 | ENSMUSG00000116580 | Gm9525 | 20 |
| ENSMUSG00000113664 | Gm47184 | 20 | ENSMUSG00000096950 | Gm9530 | 20 |
| ENSMUSG00000110959 | Gm47198 | 9  | ENSMUSG00000079225 | Gm9531 | 12 |
| ENSMUSG00000113706 | Gm47201 | 20 | ENSMUSG00000114558 | Gm9570 | 20 |
| ENSMUSG00000110980 | Gm47204 | 20 | ENSMUSG00000083692 | Gm9575 | 20 |
| ENSMUSG00000111312 | Gm47205 | 20 | ENSMUSG00000071691 | Gm960  | 20 |
| ENSMUSG00000112190 | Gm47209 | 20 | ENSMUSG00000114003 | Gm9616 | 20 |
| ENSMUSG00000113647 | Gm47210 | 20 | ENSMUSG00000097906 | Gm9625 | 9  |
| ENSMUSG00000112008 | Gm47218 | 20 | ENSMUSG00000098002 | Gm9658 | 20 |
| ENSMUSG00000111030 | Gm47234 | 20 | ENSMUSG00000082383 | Gm9670 | 5  |
| ENSMUSG00000114535 | Gm47246 | 20 | ENSMUSG00000063001 | Gm9701 | 9  |
| ENSMUSG00000114016 | Gm47258 | 3  | ENSMUSG00000082741 | Gm9703 | 19 |
| ENSMUSG00000113328 | Gm47260 | 5  | ENSMUSG00000037982 | Gm9725 | 20 |
| ENSMUSG00000110826 | Gm47262 | 20 | ENSMUSG00000094935 | Gm9726 | 20 |
| ENSMUSG00000111722 | Gm47270 | 20 | ENSMUSG00000089628 | Gm9727 | 20 |
| ENSMUSG00000096768 | Gm47283 | 20 | ENSMUSG00000047361 | Gm973  | 20 |
| ENSMUSG00000113789 | Gm47322 | 20 | ENSMUSG00000115483 | Gm9732 | 20 |
| ENSMUSG00000111425 | Gm47324 | 20 | ENSMUSG00000024658 | Gm9750 | 20 |
| ENSMUSG00000112556 | Gm47339 | 20 | ENSMUSG00000029360 | Gm9754 | 1  |
| ENSMUSG00000106208 | Gm4734  | 20 | ENSMUSG00000030735 | Gm9755 | 20 |
| ENSMUSG00000112595 | Gm47340 | 20 | ENSMUSG00000034437 | Gm9761 | 20 |
| ENSMUSG00000112741 | Gm47341 | 20 | ENSMUSG00000037096 | Gm9762 | 20 |
| ENSMUSG00000112243 | Gm47342 | 20 | ENSMUSG00000108391 | Gm9768 | 9  |
| ENSMUSG00000064193 | Gm4735  | 20 | ENSMUSG00000040540 | Gm9770 | 20 |
| ENSMUSG00000111435 | Gm47358 | 9  | ENSMUSG00000042165 | Gm9774 | 20 |
| ENSMUSG00000048087 | Gm4737  | 20 | ENSMUSG00000042857 | Gm9776 | 10 |
| ENSMUSG00000113656 | Gm47370 | 20 | ENSMUSG00000044330 | Gm9790 | 12 |
| ENSMUSG00000113766 | Gm47374 | 20 | ENSMUSG00000044434 | Gm9791 | 20 |
| ENSMUSG00000112808 | Gm4739  | 20 | ENSMUSG00000107176 | Gm9794 | 3  |
| ENSMUSG00000113680 | Gm47405 | 20 | ENSMUSG00000045075 | Gm9796 | 20 |
| ENSMUSG00000113502 | Gm47411 | 20 | ENSMUSG00000045455 | Gm9797 | 20 |
| ENSMUSG00000114424 | Gm47414 | 20 | ENSMUSG00000045799 | Gm9800 | 2  |
| ENSMUSG00000105461 | Gm4742  | 16 | ENSMUSG00000045813 | Gm9801 | 12 |
| ENSMUSG00000114095 | Gm47424 | 20 | ENSMUSG00000045886 | Gm9803 | 20 |
| ENSMUSG00000110877 | Gm47427 | 20 | ENSMUSG00000085783 | Gm9816 | 20 |
| ENSMUSG00000111947 | Gm47438 | 20 | ENSMUSG00000095478 | Gm9824 | 20 |
| ENSMUSG00000113606 | Gm47441 | 20 | ENSMUSG00000096403 | Gm9825 | 20 |
| ENSMUSG00000111361 | Gm47445 | 20 | ENSMUSG00000048538 | Gm9826 | 20 |
| ENSMUSG00000113094 | Gm47447 | 20 | ENSMUSG00000048603 | Gm9828 | 15 |
| ENSMUSG00000113047 | Gm47469 | 20 | ENSMUSG00000094437 | Gm9830 | 20 |
| ENSMUSG00000112905 | Gm47477 | 7  | ENSMUSG00000049230 | Gm9833 | 20 |
| ENSMUSG00000111496 | Gm47483 | 9  | ENSMUSG00000081071 | Gm9836 | 20 |
| ENSMUSG00000113529 | Gm47484 | 9  | ENSMUSG00000050299 | Gm9843 | 12 |
| ENSMUSG00000112947 | Gm47493 | 9  | ENSMUSG00000091955 | Gm9844 | 12 |
| ENSMUSG00000113269 | Gm47494 | 20 | ENSMUSG00000050533 | Gm9845 | 20 |
| ENSMUSG00000110840 | Gm47496 | 20 | ENSMUSG00000085666 | Gm9855 | 20 |

|                    |         |    |                    |        |    |
|--------------------|---------|----|--------------------|--------|----|
| ENSMUSG0000087235  | Gm4750  | 20 | ENSMUSG00000110945 | Gm9856 | 20 |
| ENSMUSG00000111491 | Gm47503 | 20 | ENSMUSG00000094002 | Gm9866 | 19 |
| ENSMUSG00000111466 | Gm47504 | 20 | ENSMUSG00000104516 | Gm9884 | 20 |
| ENSMUSG00000114440 | Gm47505 | 5  | ENSMUSG00000052629 | Gm9885 | 20 |
| ENSMUSG00000110791 | Gm47508 | 20 | ENSMUSG00000052673 | Gm9887 | 20 |
| ENSMUSG00000097274 | Gm47512 | 20 | ENSMUSG00000052825 | Gm9892 | 20 |
| ENSMUSG00000113320 | Gm47515 | 20 | ENSMUSG00000118038 | Gm9895 | 16 |
| ENSMUSG00000106895 | Gm4754  | 20 | ENSMUSG00000053214 | Gm9899 | 20 |
| ENSMUSG00000113519 | Gm47541 | 1  | ENSMUSG00000097271 | Gm9903 | 20 |
| ENSMUSG00000114707 | Gm47558 | 20 | ENSMUSG00000053358 | Gm9905 | 20 |
| ENSMUSG00000112922 | Gm47572 | 16 | ENSMUSG00000103469 | Gm9910 | 20 |
| ENSMUSG00000112847 | Gm47573 | 10 | ENSMUSG00000109874 | Gm9911 | 20 |
| ENSMUSG00000112317 | Gm47580 | 1  | ENSMUSG00000104178 | Gm9916 | 18 |
| ENSMUSG00000113853 | Gm47583 | 20 | ENSMUSG00000097099 | Gm9917 | 20 |
| ENSMUSG00000113708 | Gm47584 | 3  | ENSMUSG00000053830 | Gm9923 | 20 |
| ENSMUSG00000114104 | Gm47585 | 12 | ENSMUSG00000053861 | Gm9925 | 20 |
| ENSMUSG00000113326 | Gm47586 | 10 | ENSMUSG00000053925 | Gm9929 | 1  |
| ENSMUSG00000113126 | Gm47588 | 20 | ENSMUSG00000053980 | Gm9930 | 20 |
| ENSMUSG00000112601 | Gm47590 | 7  | ENSMUSG00000054061 | Gm9934 | 20 |
| ENSMUSG00000112153 | Gm47591 | 9  | ENSMUSG00000054247 | Gm9939 | 20 |
| ENSMUSG00000112015 | Gm47592 | 8  | ENSMUSG00000054450 | Gm9945 | 20 |
| ENSMUSG00000112255 | Gm47594 | 20 | ENSMUSG00000054488 | Gm9946 | 20 |
| ENSMUSG00000112759 | Gm47615 | 20 | ENSMUSG00000054493 | Gm9947 | 20 |
| ENSMUSG00000112576 | Gm47621 | 20 | ENSMUSG00000104868 | Gm9954 | 20 |
| ENSMUSG00000112681 | Gm47622 | 20 | ENSMUSG00000054945 | Gm9958 | 10 |
| ENSMUSG00000112257 | Gm47623 | 20 | ENSMUSG00000055048 | Gm9962 | 20 |
| ENSMUSG00000111918 | Gm47624 | 20 | ENSMUSG00000055323 | Gm9967 | 20 |
| ENSMUSG00000111421 | Gm47643 | 20 | ENSMUSG00000055497 | Gm9974 | 20 |
| ENSMUSG00000112734 | Gm47644 | 20 | ENSMUSG00000055958 | Gm9987 | 20 |
| ENSMUSG00000111481 | Gm47652 | 20 | ENSMUSG00000056023 | Gm9989 | 12 |
| ENSMUSG00000113980 | Gm47655 | 20 | ENSMUSG00000117505 | Gm9993 | 20 |
| ENSMUSG00000113557 | Gm47657 | 9  | ENSMUSG00000056316 | Gm9996 | 20 |
| ENSMUSG00000113993 | Gm47659 | 20 | ENSMUSG00000001157 | Gmcl1  | 20 |
| ENSMUSG00000113183 | Gm47664 | 20 | ENSMUSG00000038372 | Gmds   | 20 |
| ENSMUSG00000113649 | Gm47665 | 9  | ENSMUSG00000028901 | Gmeb1  | 20 |
| ENSMUSG00000111065 | Gm47676 | 20 | ENSMUSG00000038705 | Gmeb2  | 12 |
| ENSMUSG00000112254 | Gm47690 | 12 | ENSMUSG00000062014 | Gmfb   | 20 |
| ENSMUSG00000112338 | Gm47693 | 13 | ENSMUSG00000060791 | Gmfg   | 20 |
| ENSMUSG00000114584 | Gm47694 | 20 | ENSMUSG00000036246 | Gmip   | 20 |
| ENSMUSG00000112075 | Gm47700 | 20 | ENSMUSG00000068428 | Gmnc   | 13 |
| ENSMUSG00000114148 | Gm47701 | 20 | ENSMUSG00000006715 | Gmnn   | 20 |
| ENSMUSG00000112914 | Gm47702 | 20 | ENSMUSG00000033021 | Gmppa  | 20 |
| ENSMUSG00000112928 | Gm47710 | 19 | ENSMUSG00000070284 | Gmppb  | 20 |
| ENSMUSG00000112468 | Gm47720 | 20 | ENSMUSG00000000253 | Gmpr   | 9  |
| ENSMUSG00000112879 | Gm47726 | 20 | ENSMUSG00000002326 | Gmpr2  | 20 |
| ENSMUSG00000114121 | Gm47728 | 20 | ENSMUSG00000027823 | Gmps   | 3  |
| ENSMUSG00000112830 | Gm47765 | 20 | ENSMUSG00000034781 | Gna11  | 20 |
| ENSMUSG00000114285 | Gm47773 | 20 | ENSMUSG00000000149 | Gna12  | 16 |
| ENSMUSG00000114907 | Gm47794 | 13 | ENSMUSG00000020611 | Gna13  | 16 |
| ENSMUSG00000114253 | Gm47798 | 6  | ENSMUSG00000024697 | Gna14  | 20 |
| ENSMUSG00000112036 | Gm47801 | 5  | ENSMUSG00000034792 | Gna15  | 20 |
| ENSMUSG00000112070 | Gm47809 | 20 | ENSMUSG00000057614 | Gnai1  | 1  |
| ENSMUSG00000114575 | Gm47814 | 20 | ENSMUSG00000032562 | Gnai2  | 7  |
| ENSMUSG00000113752 | Gm47817 | 2  | ENSMUSG00000000001 | Gnai3  | 20 |
| ENSMUSG00000113072 | Gm47820 | 20 | ENSMUSG00000024524 | Gnal   | 9  |

|                    |         |    |                    |         |    |
|--------------------|---------|----|--------------------|---------|----|
| ENSMUSG00000113650 | Gm47826 | 20 | ENSMUSG00000031748 | Gnao1   | 9  |
| ENSMUSG0000078308  | Gm47854 | 20 | ENSMUSG00000024639 | Gnaq    | 2  |
| ENSMUSG00000110772 | Gm47856 | 3  | ENSMUSG00000027523 | Gnas    | 6  |
| ENSMUSG00000110903 | Gm47857 | 20 | ENSMUSG00000086537 | Gnasas1 | 20 |
| ENSMUSG00000114083 | Gm47860 | 3  | ENSMUSG00000040009 | Gnaz    | 2  |
| ENSMUSG00000111943 | Gm47862 | 20 | ENSMUSG00000029064 | Gnb1    | 20 |
| ENSMUSG00000113165 | Gm47863 | 20 | ENSMUSG00000000884 | Gnb1l   | 20 |
| ENSMUSG00000072974 | Gm4787  | 20 | ENSMUSG00000029713 | Gnb2    | 3  |
| ENSMUSG00000112248 | Gm47910 | 20 | ENSMUSG00000023439 | Gnb3    | 20 |
| ENSMUSG00000112369 | Gm47911 | 1  | ENSMUSG00000027669 | Gnb4    | 1  |
| ENSMUSG00000114731 | Gm47914 | 20 | ENSMUSG00000032192 | Gnb5    | 9  |
| ENSMUSG00000114709 | Gm47920 | 20 | ENSMUSG00000028479 | Gne     | 20 |
| ENSMUSG00000054412 | Gm4793  | 18 | ENSMUSG00000038607 | Gng10   | 12 |
| ENSMUSG00000114721 | Gm47938 | 20 | ENSMUSG00000032766 | Gng11   | 20 |
| ENSMUSG00000111793 | Gm47950 | 20 | ENSMUSG00000036402 | Gng12   | 2  |
| ENSMUSG00000112000 | Gm47956 | 3  | ENSMUSG00000025739 | Gng13   | 12 |
| ENSMUSG00000110993 | Gm47963 | 3  | ENSMUSG00000043004 | Gng2    | 19 |
| ENSMUSG00000112300 | Gm47976 | 20 | ENSMUSG00000071658 | Gng3    | 8  |
| ENSMUSG00000112714 | Gm4798  | 20 | ENSMUSG00000021303 | Gng4    | 16 |
| ENSMUSG00000113966 | Gm47980 | 20 | ENSMUSG00000068523 | Gng5    | 9  |
| ENSMUSG00000113288 | Gm47982 | 20 | ENSMUSG00000048240 | Gng7    | 9  |
| ENSMUSG00000113698 | Gm47987 | 20 | ENSMUSG00000063594 | Gng8    | 20 |
| ENSMUSG00000113808 | Gm47988 | 20 | ENSMUSG00000038811 | Gngt2   | 12 |
| ENSMUSG00000071151 | Gm4799  | 20 | ENSMUSG00000024429 | Gnl1    | 20 |
| ENSMUSG00000114399 | Gm47994 | 20 | ENSMUSG00000028869 | Gnl2    | 20 |
| ENSMUSG00000112756 | Gm48014 | 20 | ENSMUSG00000042354 | Gnl3    | 20 |
| ENSMUSG00000112067 | Gm48015 | 20 | ENSMUSG00000025266 | Gnl3l   | 19 |
| ENSMUSG00000112745 | Gm48025 | 20 | ENSMUSG00000002769 | Gnmt    | 6  |
| ENSMUSG00000113775 | Gm48027 | 20 | ENSMUSG00000031985 | Gnpat   | 1  |
| ENSMUSG00000098158 | Gm4804  | 20 | ENSMUSG00000052102 | Gnpda1  | 20 |
| ENSMUSG00000111905 | Gm48045 | 20 | ENSMUSG00000029209 | Gnpda2  | 20 |
| ENSMUSG00000114102 | Gm48048 | 20 | ENSMUSG00000037722 | Gnpnat1 | 20 |
| ENSMUSG00000111098 | Gm48057 | 9  | ENSMUSG00000035311 | Gnptab  | 20 |
| ENSMUSG00000113852 | Gm48062 | 20 | ENSMUSG00000035521 | Gnptg   | 3  |
| ENSMUSG00000113020 | Gm48063 | 20 | ENSMUSG00000015812 | Gnrh1   | 20 |
| ENSMUSG00000114254 | Gm48067 | 20 | ENSMUSG00000034707 | Gns     | 20 |
| ENSMUSG00000111547 | Gm48069 | 20 | ENSMUSG00000026754 | Golga1  | 20 |
| ENSMUSG00000112875 | Gm48074 | 20 | ENSMUSG00000002546 | Golga2  | 20 |
| ENSMUSG00000114293 | Gm48078 | 20 | ENSMUSG00000029502 | Golga3  | 20 |
| ENSMUSG00000113527 | Gm48079 | 20 | ENSMUSG00000038708 | Golga4  | 20 |
| ENSMUSG00000111928 | Gm48082 | 20 | ENSMUSG00000021192 | Golga5  | 20 |
| ENSMUSG00000112229 | Gm48086 | 19 | ENSMUSG00000015341 | Golga7  | 16 |
| ENSMUSG00000110758 | Gm48092 | 20 | ENSMUSG00000042532 | Golga7b | 20 |
| ENSMUSG00000113263 | Gm4811  | 20 | ENSMUSG00000034243 | Golgb1  | 20 |
| ENSMUSG00000110928 | Gm48114 | 3  | ENSMUSG00000034109 | Golim4  | 18 |
| ENSMUSG00000111934 | Gm48123 | 20 | ENSMUSG00000021556 | Golm1   | 5  |
| ENSMUSG00000110832 | Gm48125 | 20 | ENSMUSG00000022200 | Golph3  | 2  |
| ENSMUSG00000111271 | Gm48127 | 20 | ENSMUSG00000046519 | Golph3l | 20 |
| ENSMUSG00000111323 | Gm48129 | 12 | ENSMUSG00000030245 | Golt1b  | 20 |
| ENSMUSG00000114822 | Gm4813  | 20 | ENSMUSG00000054199 | Gon4l   | 9  |
| ENSMUSG00000113571 | Gm48137 | 20 | ENSMUSG00000091931 | Gon7    | 20 |
| ENSMUSG00000113842 | Gm48138 | 1  | ENSMUSG00000019861 | Gopc    | 20 |
| ENSMUSG00000114193 | Gm48139 | 20 | ENSMUSG00000040124 | Gorab   | 20 |
| ENSMUSG00000112806 | Gm48146 | 20 | ENSMUSG00000032513 | Gorasp1 | 20 |
| ENSMUSG00000113223 | Gm48147 | 20 | ENSMUSG00000014959 | Gorasp2 | 1  |

|                    |         |    |                    |            |    |
|--------------------|---------|----|--------------------|------------|----|
| ENSMUSG00000112056 | Gm48181 | 20 | ENSMUSG00000010392 | Gosr1      | 20 |
| ENSMUSG00000112448 | Gm48182 | 20 | ENSMUSG00000020946 | Gosr2      | 3  |
| ENSMUSG00000111756 | Gm48183 | 4  | ENSMUSG00000025190 | Got1       | 20 |
| ENSMUSG00000114835 | Gm48194 | 20 | ENSMUSG00000039720 | Got111     | 20 |
| ENSMUSG00000112512 | Gm48203 | 20 | ENSMUSG00000031672 | Got2       | 9  |
| ENSMUSG00000112900 | Gm48204 | 20 | ENSMUSG00000080935 | Got2-ps1   | 9  |
| ENSMUSG00000112571 | Gm48207 | 20 | ENSMUSG00000050761 | Gp1bb      | 20 |
| ENSMUSG00000112637 | Gm48225 | 20 | ENSMUSG00000022561 | Gpaa1      | 20 |
| ENSMUSG00000112302 | Gm48226 | 20 | ENSMUSG00000022008 | Gpalpp1    | 20 |
| ENSMUSG00000112391 | Gm48230 | 20 | ENSMUSG00000024978 | Gpam       | 20 |
| ENSMUSG00000112090 | Gm48231 | 2  | ENSMUSG00000092417 | Gpank1     | 2  |
| ENSMUSG00000111211 | Gm48233 | 20 | ENSMUSG00000046338 | Gpat2      | 6  |
| ENSMUSG00000114230 | Gm48239 | 20 | ENSMUSG00000029314 | Gpat3      | 20 |
| ENSMUSG00000115593 | Gm4824  | 12 | ENSMUSG00000031545 | Gpat4      | 1  |
| ENSMUSG00000111447 | Gm48249 | 20 | ENSMUSG00000063808 | Gpatch1    | 9  |
| ENSMUSG00000114812 | Gm48254 | 20 | ENSMUSG00000050668 | Gpatch11   | 20 |
| ENSMUSG00000113810 | Gm48259 | 19 | ENSMUSG00000039210 | Gpatch2    | 2  |
| ENSMUSG00000113073 | Gm48261 | 19 | ENSMUSG00000021254 | Gpatch2l   | 20 |
| ENSMUSG00000113742 | Gm48262 | 19 | ENSMUSG00000028850 | Gpatch3    | 20 |
| ENSMUSG00000114626 | Gm48266 | 20 | ENSMUSG00000028069 | Gpatch4    | 20 |
| ENSMUSG00000114624 | Gm48267 | 5  | ENSMUSG00000034621 | Gpatch8    | 20 |
| ENSMUSG00000112074 | Gm48278 | 20 | ENSMUSG00000032745 | Gpbp1      | 20 |
| ENSMUSG00000112060 | Gm48279 | 20 | ENSMUSG00000034042 | Gpbp111    | 12 |
| ENSMUSG00000116620 | Gm4828  | 12 | ENSMUSG00000034220 | Gpc1       | 9  |
| ENSMUSG00000112589 | Gm48280 | 20 | ENSMUSG00000029510 | Gpc2       | 20 |
| ENSMUSG00000112059 | Gm48282 | 20 | ENSMUSG00000055653 | Gpc3       | 6  |
| ENSMUSG00000111504 | Gm48284 | 2  | ENSMUSG00000031119 | Gpc4       | 5  |
| ENSMUSG00000113910 | Gm48286 | 20 | ENSMUSG00000022112 | Gpc5       | 1  |
| ENSMUSG00000116779 | Gm4829  | 20 | ENSMUSG00000058571 | Gpc6       | 1  |
| ENSMUSG00000111794 | Gm48294 | 20 | ENSMUSG00000027346 | Gpcpd1     | 8  |
| ENSMUSG00000114309 | Gm48295 | 20 | ENSMUSG00000023019 | Gpd1       | 20 |
| ENSMUSG00000112820 | Gm48298 | 20 | ENSMUSG00000050627 | Gpd1l      | 1  |
| ENSMUSG00000113041 | Gm48302 | 20 | ENSMUSG00000026827 | Gpd2       | 3  |
| ENSMUSG00000111017 | Gm48314 | 1  | ENSMUSG00000053647 | Gper1      | 20 |
| ENSMUSG00000113391 | Gm48327 | 20 | ENSMUSG00000047454 | Gphn       | 20 |
| ENSMUSG00000113588 | Gm48328 | 20 | ENSMUSG00000036427 | Gpi1       | 8  |
| ENSMUSG00000117428 | Gm4833  | 20 | ENSMUSG00000031148 | Gpkow      | 20 |
| ENSMUSG00000112927 | Gm48332 | 20 | ENSMUSG00000021340 | Gpld1      | 9  |
| ENSMUSG00000111442 | Gm48334 | 20 | ENSMUSG00000031517 | Gpm6a      | 4  |
| ENSMUSG00000110894 | Gm48335 | 1  | ENSMUSG00000031342 | Gpm6b      | 9  |
| ENSMUSG00000114934 | Gm48342 | 20 | ENSMUSG00000064037 | Gpn1       | 20 |
| ENSMUSG00000113191 | Gm48343 | 20 | ENSMUSG00000028848 | Gpn2       | 20 |
| ENSMUSG00000113871 | Gm48349 | 20 | ENSMUSG00000029464 | Gpn3       | 20 |
| ENSMUSG00000043223 | Gm4835  | 20 | ENSMUSG00000029816 | Gpnmb      | 1  |
| ENSMUSG00000114014 | Gm48350 | 20 | ENSMUSG00000046856 | Gpr1       | 20 |
| ENSMUSG00000112309 | Gm48353 | 13 | ENSMUSG00000036357 | Gpr101     | 20 |
| ENSMUSG00000114524 | Gm48357 | 20 | ENSMUSG00000000194 | Gpr107     | 20 |
| ENSMUSG00000113395 | Gm48365 | 12 | ENSMUSG00000005823 | Gpr108     | 20 |
| ENSMUSG00000113349 | Gm48369 | 20 | ENSMUSG00000041468 | Gpr12      | 20 |
| ENSMUSG00000111539 | Gm48372 | 20 | ENSMUSG00000043398 | Gpr135     | 1  |
| ENSMUSG00000114094 | Gm48375 | 20 | ENSMUSG00000024958 | Gpr137     | 18 |
| ENSMUSG00000113864 | Gm48381 | 20 | ENSMUSG00000021306 | Gpr137b    | 20 |
| ENSMUSG00000113917 | Gm48382 | 20 | ENSMUSG00000097715 | Gpr137b-ps | 20 |
| ENSMUSG00000110901 | Gm48393 | 20 | ENSMUSG00000049092 | Gpr137c    | 18 |
| ENSMUSG00000118282 | Gm4840  | 20 | ENSMUSG00000066197 | Gpr139     | 8  |



|                    |         |    |                    |         |    |
|--------------------|---------|----|--------------------|---------|----|
| ENSMUSG00000113385 | Gm48405 | 20 | ENSMUSG00000044197 | Gpr146  | 20 |
| ENSMUSG00000113309 | Gm48408 | 20 | ENSMUSG00000043441 | Gpr149  | 20 |
| ENSMUSG00000113070 | Gm48420 | 20 | ENSMUSG00000045509 | Gpr150  | 20 |
| ENSMUSG00000114749 | Gm48442 | 20 | ENSMUSG00000042804 | Gpr153  | 18 |
| ENSMUSG00000111485 | Gm48443 | 6  | ENSMUSG00000041762 | Gpr155  | 9  |
| ENSMUSG00000111424 | Gm48478 | 20 | ENSMUSG00000046961 | Gpr156  | 18 |
| ENSMUSG00000113167 | Gm48482 | 20 | ENSMUSG00000047875 | Gpr157  | 20 |
| ENSMUSG00000112666 | Gm48485 | 1  | ENSMUSG00000045967 | Gpr158  | 9  |
| ENSMUSG00000100204 | Gm4849  | 20 | ENSMUSG00000037661 | Gpr160  | 20 |
| ENSMUSG00000113889 | Gm48501 | 20 | ENSMUSG00000040836 | Gpr161  | 5  |
| ENSMUSG00000112112 | Gm48508 | 1  | ENSMUSG00000038390 | Gpr162  | 9  |
| ENSMUSG00000112655 | Gm48511 | 9  | ENSMUSG00000031210 | Gpr165  | 9  |
| ENSMUSG00000081185 | Gm4852  | 20 | ENSMUSG00000052229 | Gpr17   | 9  |
| ENSMUSG00000111521 | Gm48529 | 20 | ENSMUSG00000056679 | Gpr173  | 20 |
| ENSMUSG00000112020 | Gm48532 | 20 | ENSMUSG00000073008 | Gpr174  | 20 |
| ENSMUSG00000112169 | Gm48536 | 20 | ENSMUSG00000040133 | Gpr176  | 20 |
| ENSMUSG00000112483 | Gm48542 | 9  | ENSMUSG00000070337 | Gpr179  | 9  |
| ENSMUSG00000112420 | Gm48543 | 20 | ENSMUSG00000022131 | Gpr180  | 20 |
| ENSMUSG00000113262 | Gm48551 | 20 | ENSMUSG00000058396 | Gpr182  | 20 |
| ENSMUSG00000113222 | Gm48557 | 20 | ENSMUSG00000051212 | Gpr183  | 20 |
| ENSMUSG00000111345 | Gm48562 | 20 | ENSMUSG00000032641 | Gpr19   | 20 |
| ENSMUSG00000114773 | Gm48568 | 1  | ENSMUSG00000053164 | Gpr21   | 1  |
| ENSMUSG00000114501 | Gm48582 | 2  | ENSMUSG00000044067 | Gpr22   | 5  |
| ENSMUSG00000114277 | Gm48583 | 20 | ENSMUSG00000052759 | Gpr25   | 20 |
| ENSMUSG00000113250 | Gm48585 | 7  | ENSMUSG00000040125 | Gpr26   | 9  |
| ENSMUSG00000113195 | Gm48586 | 6  | ENSMUSG00000072875 | Gpr27   | 20 |
| ENSMUSG00000113505 | Gm48593 | 20 | ENSMUSG00000049649 | Gpr3    | 20 |
| ENSMUSG00000114267 | Gm48600 | 20 | ENSMUSG00000040229 | Gpr34   | 6  |
| ENSMUSG00000114431 | Gm48601 | 12 | ENSMUSG00000026271 | Gpr35   | 20 |
| ENSMUSG00000114310 | Gm48602 | 20 | ENSMUSG00000039904 | Gpr37   | 16 |
| ENSMUSG00000111291 | Gm48604 | 20 | ENSMUSG00000026424 | Gpr3711 | 20 |
| ENSMUSG00000110914 | Gm48611 | 20 | ENSMUSG00000026343 | Gpr39   | 9  |
| ENSMUSG00000113045 | Gm48621 | 20 | ENSMUSG00000044317 | Gpr4    | 18 |
| ENSMUSG00000113404 | Gm48622 | 20 | ENSMUSG00000041907 | Gpr45   | 1  |
| ENSMUSG00000112941 | Gm48623 | 17 | ENSMUSG00000118401 | Gpr52   | 9  |
| ENSMUSG00000113140 | Gm48624 | 20 | ENSMUSG00000046922 | Gpr6    | 9  |
| ENSMUSG00000111292 | Gm48627 | 20 | ENSMUSG00000046793 | Gpr61   | 20 |
| ENSMUSG00000113200 | Gm48632 | 20 | ENSMUSG00000091735 | Gpr62   | 18 |
| ENSMUSG00000114664 | Gm48639 | 20 | ENSMUSG00000040372 | Gpr63   | 20 |
| ENSMUSG00000111069 | Gm48646 | 20 | ENSMUSG00000021886 | Gpr65   | 20 |
| ENSMUSG00000104777 | Gm4865  | 20 | ENSMUSG00000047415 | Gpr68   | 19 |
| ENSMUSG00000113425 | Gm48653 | 20 | ENSMUSG00000043999 | Gpr75   | 20 |
| ENSMUSG00000112393 | Gm48655 | 12 | ENSMUSG00000031932 | Gpr83   | 9  |
| ENSMUSG00000111505 | Gm48673 | 20 | ENSMUSG00000063234 | Gpr84   | 20 |
| ENSMUSG00000111971 | Gm48678 | 9  | ENSMUSG00000048216 | Gpr85   | 1  |
| ENSMUSG00000113623 | Gm48691 | 10 | ENSMUSG00000068696 | Gpr88   | 9  |
| ENSMUSG00000114153 | Gm48692 | 7  | ENSMUSG00000028096 | Gpr89   | 20 |
| ENSMUSG00000113812 | Gm48699 | 19 | ENSMUSG00000043384 | Gprasp1 | 9  |
| ENSMUSG00000113055 | Gm48700 | 1  | ENSMUSG00000072966 | Gprasp2 | 9  |
| ENSMUSG00000113841 | Gm48701 | 20 | ENSMUSG00000008734 | Gprc5b  | 16 |
| ENSMUSG00000114555 | Gm48706 | 3  | ENSMUSG00000051043 | Gprc5c  | 13 |
| ENSMUSG00000113154 | Gm48713 | 19 | ENSMUSG00000069227 | Gprin1  | 5  |
| ENSMUSG00000111067 | Gm48714 | 20 | ENSMUSG00000071531 | Gprin2  | 20 |
| ENSMUSG00000111254 | Gm48717 | 1  | ENSMUSG00000045441 | Gprin3  | 9  |
| ENSMUSG00000112736 | Gm48718 | 20 | ENSMUSG00000025156 | Gps1    | 3  |

|                    |         |    |                    |          |    |
|--------------------|---------|----|--------------------|----------|----|
| ENSMUSG00000111652 | Gm48726 | 20 | ENSMUSG00000023170 | Gps2     | 19 |
| ENSMUSG00000113078 | Gm48734 | 20 | ENSMUSG00000026930 | Gpsm1    | 2  |
| ENSMUSG00000113601 | Gm48735 | 20 | ENSMUSG00000027883 | Gpsm2    | 18 |
| ENSMUSG00000111107 | Gm48737 | 20 | ENSMUSG00000034786 | Gpsm3    | 20 |
| ENSMUSG00000111626 | Gm48738 | 20 | ENSMUSG00000022546 | Gpt      | 2  |
| ENSMUSG00000110885 | Gm48739 | 20 | ENSMUSG00000031700 | Gpt2     | 20 |
| ENSMUSG00000111077 | Gm48743 | 20 | ENSMUSG00000063856 | Gpx1     | 5  |
| ENSMUSG00000112543 | Gm48744 | 20 | ENSMUSG00000018339 | Gpx3     | 6  |
| ENSMUSG00000112019 | Gm48748 | 20 | ENSMUSG00000075706 | Gpx4     | 12 |
| ENSMUSG00000082791 | Gm4875  | 20 | ENSMUSG00000110841 | Gpx4-ps2 | 12 |
| ENSMUSG00000112307 | Gm48751 | 20 | ENSMUSG00000004341 | Gpx6     | 1  |
| ENSMUSG00000111951 | Gm48755 | 18 | ENSMUSG00000028597 | Gpx7     | 20 |
| ENSMUSG00000112162 | Gm48758 | 20 | ENSMUSG00000021760 | Gpx8     | 13 |
| ENSMUSG00000054556 | Gm4876  | 20 | ENSMUSG00000001248 | Gramd1a  | 12 |
| ENSMUSG00000114617 | Gm48766 | 20 | ENSMUSG00000040111 | Gramd1b  | 12 |
| ENSMUSG00000112346 | Gm48768 | 20 | ENSMUSG00000036292 | Gramd1c  | 20 |
| ENSMUSG00000113159 | Gm48771 | 9  | ENSMUSG00000074259 | Gramd2   | 20 |
| ENSMUSG00000111929 | Gm48780 | 20 | ENSMUSG00000001700 | Gramd3   | 20 |
| ENSMUSG00000110727 | Gm48784 | 20 | ENSMUSG00000035900 | Gramd4   | 20 |
| ENSMUSG00000111228 | Gm48789 | 20 | ENSMUSG00000004837 | Grap     | 12 |
| ENSMUSG00000111390 | Gm48796 | 20 | ENSMUSG00000042351 | Grap2    | 9  |
| ENSMUSG00000112816 | Gm48798 | 20 | ENSMUSG00000000531 | Grasp    | 6  |
| ENSMUSG00000112596 | Gm48804 | 7  | ENSMUSG00000020176 | Grb10    | 17 |
| ENSMUSG00000112033 | Gm48808 | 20 | ENSMUSG00000026888 | Grb14    | 9  |
| ENSMUSG00000110895 | Gm48822 | 20 | ENSMUSG00000059923 | Grb2     | 18 |
| ENSMUSG00000114863 | Gm48824 | 20 | ENSMUSG00000019312 | Grb7     | 20 |
| ENSMUSG00000113894 | Gm48838 | 9  | ENSMUSG00000072772 | Grc10    | 12 |
| ENSMUSG00000111664 | Gm48865 | 20 | ENSMUSG00000036523 | Greb1    | 9  |
| ENSMUSG00000113869 | Gm48869 | 20 | ENSMUSG00000042942 | Greb1l   | 9  |
| ENSMUSG00000086229 | Gm4887  | 20 | ENSMUSG00000074934 | Grem1    | 2  |
| ENSMUSG00000113065 | Gm48870 | 20 | ENSMUSG00000050069 | Grem2    | 20 |
| ENSMUSG00000112948 | Gm48871 | 20 | ENSMUSG00000020656 | Grh1     | 5  |
| ENSMUSG00000113905 | Gm48872 | 20 | ENSMUSG00000037188 | Grh3     | 20 |
| ENSMUSG00000112744 | Gm48880 | 20 | ENSMUSG00000035637 | Grhpr    | 7  |
| ENSMUSG00000113119 | Gm48883 | 20 | ENSMUSG00000020524 | Gria1    | 18 |
| ENSMUSG00000112944 | Gm48885 | 20 | ENSMUSG00000033981 | Gria2    | 18 |
| ENSMUSG00000113922 | Gm48887 | 4  | ENSMUSG00000001986 | Gria3    | 9  |
| ENSMUSG00000112955 | Gm48889 | 20 | ENSMUSG00000025892 | Gria4    | 18 |
| ENSMUSG00000113984 | Gm48890 | 18 | ENSMUSG00000041078 | Grid1    | 1  |
| ENSMUSG00000111950 | Gm48893 | 20 | ENSMUSG00000071424 | Grid2    | 2  |
| ENSMUSG00000114887 | Gm48894 | 19 | ENSMUSG00000010825 | Grid2ip  | 18 |
| ENSMUSG00000112441 | Gm48898 | 20 | ENSMUSG00000022935 | Grik1    | 6  |
| ENSMUSG00000097174 | Gm4890  | 20 | ENSMUSG00000056073 | Grik2    | 9  |
| ENSMUSG00000114081 | Gm48904 | 20 | ENSMUSG00000001985 | Grik3    | 9  |
| ENSMUSG00000113886 | Gm48905 | 20 | ENSMUSG00000032017 | Grik4    | 5  |
| ENSMUSG00000115545 | Gm48908 | 20 | ENSMUSG00000003378 | Grik5    | 9  |
| ENSMUSG00000115194 | Gm48909 | 20 | ENSMUSG00000026959 | Grin1    | 9  |
| ENSMUSG00000115339 | Gm48913 | 20 | ENSMUSG00000085830 | Grin1os  | 20 |
| ENSMUSG00000113080 | Gm48928 | 20 | ENSMUSG00000059003 | Grin2a   | 5  |
| ENSMUSG00000115360 | Gm48932 | 1  | ENSMUSG00000030209 | Grin2b   | 9  |
| ENSMUSG00000115772 | Gm48935 | 20 | ENSMUSG00000020734 | Grin2c   | 16 |
| ENSMUSG00000115389 | Gm48936 | 10 | ENSMUSG00000002771 | Grin2d   | 18 |
| ENSMUSG00000115041 | Gm48939 | 20 | ENSMUSG00000039579 | Grin3a   | 18 |
| ENSMUSG00000115228 | Gm48948 | 20 | ENSMUSG00000035745 | Grin3b   | 20 |
| ENSMUSG00000115417 | Gm48949 | 20 | ENSMUSG00000022564 | Grina    | 20 |

|                    |           |    |                    |         |    |
|--------------------|-----------|----|--------------------|---------|----|
| ENSMUSG0000044268  | Gm4895    | 20 | ENSMUSG0000034813  | Grip1   | 20 |
| ENSMUSG00000115742 | Gm48950   | 3  | ENSMUSG0000030098  | Grip2   | 18 |
| ENSMUSG00000115729 | Gm48957   | 12 | ENSMUSG0000031153  | Gripap1 | 9  |
| ENSMUSG00000114996 | Gm48958   | 3  | ENSMUSG0000024858  | Grk2    | 9  |
| ENSMUSG00000115793 | Gm48961   | 20 | ENSMUSG0000042249  | Grk3    | 19 |
| ENSMUSG00000115340 | Gm48965   | 20 | ENSMUSG0000052783  | Grk4    | 20 |
| ENSMUSG00000115314 | Gm48966   | 20 | ENSMUSG0000003228  | Grk5    | 20 |
| ENSMUSG00000115023 | Gm48967   | 20 | ENSMUSG00000074886 | Grk6    | 20 |
| ENSMUSG00000115044 | Gm48978   | 20 | ENSMUSG00000019828 | Grm1    | 18 |
| ENSMUSG00000115570 | Gm48986   | 20 | ENSMUSG00000023192 | Grm2    | 5  |
| ENSMUSG00000115650 | Gm48992   | 20 | ENSMUSG00000003974 | Grm3    | 9  |
| ENSMUSG00000115755 | Gm48993   | 20 | ENSMUSG00000063239 | Grm4    | 1  |
| ENSMUSG00000115252 | Gm48996   | 19 | ENSMUSG00000049583 | Grm5    | 9  |
| ENSMUSG00000115087 | Gm48998   | 20 | ENSMUSG00000056755 | Grm7    | 7  |
| ENSMUSG00000115509 | Gm49012   | 20 | ENSMUSG00000024211 | Grm8    | 20 |
| ENSMUSG00000114278 | Gm49027   | 20 | ENSMUSG00000034708 | Grn     | 20 |
| ENSMUSG00000115248 | Gm49037   | 20 | ENSMUSG00000024517 | Grp     | 20 |
| ENSMUSG00000107970 | Gm49058   | 20 | ENSMUSG00000029198 | Grpel1  | 20 |
| ENSMUSG00000114771 | Gm49064   | 2  | ENSMUSG00000024580 | Grpel2  | 20 |
| ENSMUSG00000115810 | Gm49066   | 20 | ENSMUSG00000031364 | Grpr    | 20 |
| ENSMUSG00000114970 | Gm49069   | 9  | ENSMUSG00000050105 | Grrp1   | 18 |
| ENSMUSG00000044221 | Grsf1     | 16 |                    |         |    |
| ENSMUSG00000038515 | Grtp1     | 20 | ENSMUSG00000003283 | Hck     | 20 |
| ENSMUSG00000053801 | Grwd1     | 20 | ENSMUSG00000022831 | Hcls1   | 20 |
| ENSMUSG00000039934 | Gsap      | 20 | ENSMUSG00000021730 | Hcn1    | 20 |
| ENSMUSG00000022575 | Gsdmd     | 20 | ENSMUSG00000020331 | Hcn2    | 18 |
| ENSMUSG00000029821 | Gsdme     | 20 | ENSMUSG00000028051 | Hcn3    | 20 |
| ENSMUSG00000031822 | Gse1      | 5  | ENSMUSG00000032338 | Hcn4    | 18 |
| ENSMUSG00000046182 | Gsg1l     | 9  | ENSMUSG00000028778 | Hctr1   | 20 |
| ENSMUSG00000057177 | Gsk3a     | 1  | ENSMUSG00000032360 | Hctr2   | 20 |
| ENSMUSG00000022812 | Gsk3b     | 8  | ENSMUSG00000028800 | Hdac1   | 9  |
| ENSMUSG00000044715 | Gskip     | 20 | ENSMUSG00000062906 | Hdac10  | 20 |
| ENSMUSG00000026879 | Gsn       | 16 | ENSMUSG00000034245 | Hdac11  | 2  |
| ENSMUSG00000062203 | Gspt1     | 20 | ENSMUSG00000019777 | Hdac2   | 18 |
| ENSMUSG00000071723 | Gspt2     | 16 | ENSMUSG00000024454 | Hdac3   | 20 |
| ENSMUSG00000031584 | Gsr       | 20 | ENSMUSG00000026313 | Hdac4   | 2  |
| ENSMUSG00000027610 | Gss       | 9  | ENSMUSG00000008855 | Hdac5   | 12 |
| ENSMUSG00000085317 | Gssos2    | 20 | ENSMUSG00000031161 | Hdac6   | 20 |
| ENSMUSG00000025934 | Gsta3     | 20 | ENSMUSG00000022475 | Hdac7   | 20 |
| ENSMUSG00000032348 | Gsta4     | 20 | ENSMUSG00000067567 | Hdac8   | 20 |
| ENSMUSG00000028018 | Gstcd     | 20 | ENSMUSG00000004698 | Hdac9   | 18 |
| ENSMUSG00000029864 | Gstk1     | 20 | ENSMUSG00000027360 | Hdc     | 6  |
| ENSMUSG00000058135 | Gstm1     | 1  | ENSMUSG00000000295 | Hddc2   | 20 |
| ENSMUSG00000040562 | Gstm2     | 20 | ENSMUSG00000030532 | Hddc3   | 20 |
| ENSMUSG00000107369 | Gstm2-ps1 | 20 | ENSMUSG00000004897 | Hdgf    | 20 |
| ENSMUSG00000027890 | Gstm4     | 20 | ENSMUSG00000002833 | Hdgfl2  | 3  |
| ENSMUSG00000004032 | Gstm5     | 3  | ENSMUSG00000025104 | Hdgfl3  | 20 |
| ENSMUSG00000068762 | Gstm6     | 6  | ENSMUSG00000025421 | Hdhd2   | 20 |
| ENSMUSG00000004035 | Gstm7     | 2  | ENSMUSG00000038422 | Hdhd3   | 10 |
| ENSMUSG00000025068 | Gsto1     | 1  | ENSMUSG00000058979 | Hdhd5   | 20 |
| ENSMUSG00000025069 | Gsto2     | 9  | ENSMUSG00000034088 | Hdlbp   | 12 |
| ENSMUSG00000001663 | Gstt1     | 20 | ENSMUSG00000034551 | Hdx     | 3  |
| ENSMUSG00000033318 | Gstt2     | 9  | ENSMUSG00000050244 | Heatr1  | 3  |
| ENSMUSG00000001665 | Gstt3     | 20 | ENSMUSG00000031657 | Heatr3  | 20 |
| ENSMUSG00000021033 | Gstz1     | 9  | ENSMUSG00000035181 | Heatr5a | 3  |

|                    |               |    |                    |          |    |
|--------------------|---------------|----|--------------------|----------|----|
| ENSMUSG00000086429 | Gt(ROSA)26Sor | 20 | ENSMUSG00000039414 | Heatr5b  | 20 |
| ENSMUSG00000036890 | Gtdc1         | 5  | ENSMUSG00000000976 | Heatr6   | 9  |
| ENSMUSG00000020962 | Gtf2a1        | 1  | ENSMUSG00000042770 | Hebp1    | 19 |
| ENSMUSG00000033543 | Gtf2a2        | 20 | ENSMUSG00000019853 | Hebp2    | 20 |
| ENSMUSG00000028271 | Gtf2b         | 18 | ENSMUSG00000039879 | Heca     | 20 |
| ENSMUSG00000022828 | Gtf2e1        | 20 | ENSMUSG00000035247 | Hectd1   | 2  |
| ENSMUSG00000031585 | Gtf2e2        | 3  | ENSMUSG00000041180 | Hectd2   | 5  |
| ENSMUSG00000002658 | Gtf2f1        | 20 | ENSMUSG00000087579 | Hectd2os | 9  |
| ENSMUSG00000067995 | Gtf2f2        | 20 | ENSMUSG00000046861 | Hectd3   | 20 |
| ENSMUSG00000006599 | Gtf2h1        | 20 | ENSMUSG00000042744 | Hectd4   | 19 |
| ENSMUSG00000021639 | Gtf2h2        | 9  | ENSMUSG00000021301 | Hecw1    | 19 |
| ENSMUSG00000029387 | Gtf2h3        | 20 | ENSMUSG00000042807 | Hecw2    | 7  |
| ENSMUSG00000001524 | Gtf2h4        | 2  | ENSMUSG00000075254 | Heg1     | 19 |
| ENSMUSG00000034345 | Gtf2h5        | 20 | ENSMUSG00000020228 | Helb     | 20 |
| ENSMUSG00000060261 | Gtf2i         | 3  | ENSMUSG00000025001 | Hells    | 20 |
| ENSMUSG00000023079 | Gtf2ird1      | 20 | ENSMUSG00000035266 | Helq     | 20 |
| ENSMUSG00000015942 | Gtf2ird2      | 20 | ENSMUSG00000020721 | Helz     | 20 |
| ENSMUSG00000016503 | Gtf3a         | 20 | ENSMUSG00000027580 | Helz2    | 20 |
| ENSMUSG00000032777 | Gtf3c1        | 7  | ENSMUSG00000032579 | Hemk1    | 13 |
| ENSMUSG00000106864 | Gtf3c2        | 20 | ENSMUSG00000045662 | Henmt1   | 9  |
| ENSMUSG00000041303 | Gtf3c3        | 12 | ENSMUSG00000046240 | Hepacam  | 16 |
| ENSMUSG00000035666 | Gtf3c4        | 20 | ENSMUSG00000031209 | Heph     | 20 |
| ENSMUSG00000026816 | Gtf3c5        | 20 | ENSMUSG00000038664 | Herc1    | 19 |
| ENSMUSG00000019837 | Gtf3c6        | 20 | ENSMUSG00000030451 | Herc2    | 3  |
| ENSMUSG00000042535 | Gtpbp1        | 20 | ENSMUSG00000029804 | Herc3    | 9  |
| ENSMUSG00000040464 | Gtpbp10       | 12 | ENSMUSG00000020064 | Herc4    | 20 |
| ENSMUSG00000023952 | Gtpbp2        | 4  | ENSMUSG00000029798 | Herc6    | 20 |
| ENSMUSG00000007610 | Gtpbp3        | 20 | ENSMUSG00000031770 | Herpud1  | 6  |
| ENSMUSG00000021149 | Gtpbp4        | 20 | ENSMUSG00000008429 | Herpud2  | 20 |
| ENSMUSG00000033434 | Gtpbp6        | 20 | ENSMUSG00000022528 | Hes1     | 20 |
| ENSMUSG00000022668 | Gtpbp8        | 20 | ENSMUSG00000048001 | Hes5     | 20 |
| ENSMUSG00000033416 | Gucd1         | 13 | ENSMUSG00000067071 | Hes6     | 12 |
| ENSMUSG00000033910 | Gucy1a1       | 9  | ENSMUSG00000023781 | Hes7     | 20 |
| ENSMUSG00000041624 | Gucy1a2       | 12 | ENSMUSG00000025232 | Hexa     | 20 |
| ENSMUSG00000028005 | Gucy1b1       | 6  | ENSMUSG00000021665 | Hexb     | 19 |
| ENSMUSG00000042638 | Gucy2c        | 6  | ENSMUSG00000039307 | Hexdc    | 3  |
| ENSMUSG00000020890 | Gucy2e        | 20 | ENSMUSG00000048878 | Hexim1   | 3  |
| ENSMUSG00000042282 | Gucy2f        | 9  | ENSMUSG00000043372 | Hexim2   | 9  |
| ENSMUSG00000055523 | Gucy2g        | 20 | ENSMUSG00000040289 | Hey1     | 20 |
| ENSMUSG00000029208 | Guf1          | 20 | ENSMUSG00000019789 | Hey2     | 13 |
| ENSMUSG00000020444 | Guk1          | 12 | ENSMUSG00000032744 | Heyl     | 20 |
| ENSMUSG00000056870 | Gulp1         | 20 | ENSMUSG00000006611 | Hfe      | 1  |
| ENSMUSG00000025534 | Gusb          | 20 | ENSMUSG00000043410 | Hfm1     | 20 |
| ENSMUSG00000036197 | Gxylt1        | 9  | ENSMUSG00000028864 | Hgf      | 1  |
| ENSMUSG00000030074 | Gxylt2        | 1  | ENSMUSG00000022554 | Hgh1     | 20 |
| ENSMUSG00000019528 | Gyg           | 20 | ENSMUSG00000025793 | Hgs      | 20 |
| ENSMUSG00000003865 | Gys1          | 18 | ENSMUSG00000037260 | Hgsnat   | 20 |
| ENSMUSG00000027439 | Gzf1          | 8  | ENSMUSG00000037375 | Hhat     | 20 |
| ENSMUSG00000042385 | Gzmk          | 20 | ENSMUSG00000032523 | Hhatl    | 20 |
| ENSMUSG00000054206 | Gzmm          | 20 | ENSMUSG00000064325 | Hhip     | 1  |
| ENSMUSG00000019188 | H13           | 20 | ENSMUSG00000021260 | Hhipl1   | 1  |
| ENSMUSG00000096210 | H1f0          | 6  | ENSMUSG00000029776 | Hibadh   | 20 |
| ENSMUSG00000044927 | H1fx          | 20 | ENSMUSG00000041426 | Hibch    | 20 |
| ENSMUSG00000036594 | H2-Aa         | 20 | ENSMUSG00000043099 | Hic1     | 20 |
| ENSMUSG00000073421 | H2-Ab1        | 20 | ENSMUSG00000050240 | Hic2     | 1  |

|                    |         |    |                    |           |    |
|--------------------|---------|----|--------------------|-----------|----|
| ENSMUSG0000073406  | H2-BI   | 6  | ENSMUSG00000034586 | Hid1      | 20 |
| ENSMUSG0000073411  | H2-D1   | 20 | ENSMUSG00000021109 | Hif1a     | 19 |
| ENSMUSG0000037649  | H2-DMa  | 20 | ENSMUSG00000036450 | Hif1an    | 20 |
| ENSMUSG0000079547  | H2-DMb1 | 20 | ENSMUSG00000004328 | Hif3a     | 20 |
| ENSMUSG0000037548  | H2-DMb2 | 20 | ENSMUSG00000038412 | Higd1a    | 11 |
| ENSMUSG0000060586  | H2-Eb1  | 2  | ENSMUSG00000020928 | Higd1b    | 20 |
| ENSMUSG00000061232 | H2-K1   | 11 | ENSMUSG00000025868 | Higd2a    | 12 |
| ENSMUSG00000067203 | H2-K2   | 20 | ENSMUSG00000062797 | Hikeshi   | 20 |
| ENSMUSG00000073422 | H2-Ke6  | 9  | ENSMUSG00000043421 | Hilpda    | 20 |
| ENSMUSG00000016206 | H2-M3   | 20 | ENSMUSG00000032119 | Hinfp     | 16 |
| ENSMUSG00000024459 | H2-M5   | 20 | ENSMUSG00000020267 | Hint1     | 12 |
| ENSMUSG00000041538 | H2-Ob   | 20 | ENSMUSG00000028470 | Hint2     | 3  |
| ENSMUSG00000091705 | H2-Q2   | 20 | ENSMUSG00000019791 | Hint3     | 9  |
| ENSMUSG00000035929 | H2-Q4   | 20 | ENSMUSG00000039959 | Hip1      | 20 |
| ENSMUSG00000073409 | H2-Q6   | 11 | ENSMUSG00000000915 | Hip1r     | 20 |
| ENSMUSG00000060550 | H2-Q7   | 20 | ENSMUSG00000008730 | Hipk1     | 20 |
| ENSMUSG00000079491 | H2-T10  | 20 | ENSMUSG00000061436 | Hipk2     | 15 |
| ENSMUSG00000056116 | H2-T22  | 11 | ENSMUSG00000027177 | Hipk3     | 2  |
| ENSMUSG00000067212 | H2-T23  | 11 | ENSMUSG00000022702 | Hira      | 20 |
| ENSMUSG00000053835 | H2-T24  | 20 | ENSMUSG00000042606 | Hirip3    | 19 |
| ENSMUSG00000060032 | H2afj   | 12 | ENSMUSG00000049539 | Hist1h1a  | 20 |
| ENSMUSG00000041126 | H2afv   | 1  | ENSMUSG00000058773 | Hist1h1b  | 20 |
| ENSMUSG00000049932 | H2afx   | 20 | ENSMUSG00000036181 | Hist1h1c  | 20 |
| ENSMUSG00000015937 | H2afy   | 20 | ENSMUSG00000052565 | Hist1h1d  | 20 |
| ENSMUSG00000020086 | H2afy2  | 20 | ENSMUSG00000051627 | Hist1h1e  | 20 |
| ENSMUSG00000037894 | H2afz   | 12 | ENSMUSG00000061615 | Hist1h2ab | 20 |
| ENSMUSG00000048994 | H2ai3   | 9  | ENSMUSG00000069270 | Hist1h2ac | 20 |
| ENSMUSG00000060743 | H3f3a   | 12 | ENSMUSG00000069272 | Hist1h2ae | 20 |
| ENSMUSG00000073485 | H3f3aos | 20 | ENSMUSG00000061991 | Hist1h2af | 1  |
| ENSMUSG00000016559 | H3f3b   | 20 | ENSMUSG00000069301 | Hist1h2ag | 20 |
| ENSMUSG00000082029 | H3f3c   | 20 | ENSMUSG00000071516 | Hist1h2ai | 20 |
| ENSMUSG00000028980 | H6pd    | 20 | ENSMUSG00000063021 | Hist1h2ak | 20 |
| ENSMUSG00000021476 | Habp4   | 6  | ENSMUSG00000091383 | Hist1h2al | 20 |
| ENSMUSG00000063275 | Hacd1   | 20 | ENSMUSG00000094248 | Hist1h2ao | 20 |
| ENSMUSG00000035376 | Hacd2   | 1  | ENSMUSG00000075031 | Hist1h2bb | 20 |
| ENSMUSG00000033629 | Hacd3   | 20 | ENSMUSG00000018102 | Hist1h2bc | 19 |
| ENSMUSG00000028497 | Hacd4   | 9  | ENSMUSG00000047246 | Hist1h2be | 20 |
| ENSMUSG00000038822 | Hace1   | 9  | ENSMUSG00000058385 | Hist1h2bg | 20 |
| ENSMUSG00000021884 | Hacl1   | 3  | ENSMUSG00000069300 | Hist1h2bj | 1  |
| ENSMUSG00000027984 | Hadh    | 12 | ENSMUSG00000114279 | Hist1h2bm | 2  |
| ENSMUSG00000025745 | Hadha   | 9  | ENSMUSG00000069265 | Hist1h3a  | 20 |
| ENSMUSG00000059447 | Hadhb   | 20 | ENSMUSG00000099583 | Hist1h3d  | 20 |
| ENSMUSG00000024158 | Hagh    | 2  | ENSMUSG00000069273 | Hist1h3e  | 20 |
| ENSMUSG00000061046 | Haghl   | 2  | ENSMUSG00000100210 | Hist1h3f  | 20 |
| ENSMUSG00000075277 | Haglr   | 9  | ENSMUSG00000099517 | Hist1h3g  | 9  |
| ENSMUSG00000069930 | Hap1    | 20 | ENSMUSG00000101355 | Hist1h3h  | 20 |
| ENSMUSG00000021613 | Hapln1  | 20 | ENSMUSG00000101972 | Hist1h3i  | 1  |
| ENSMUSG00000004894 | Hapln2  | 16 | ENSMUSG00000060093 | Hist1h4a  | 20 |
| ENSMUSG00000030606 | Hapln3  | 20 | ENSMUSG00000069266 | Hist1h4b  | 20 |
| ENSMUSG00000007594 | Hapln4  | 18 | ENSMUSG00000060678 | Hist1h4c  | 19 |
| ENSMUSG00000027243 | Harbi1  | 20 | ENSMUSG00000061482 | Hist1h4d  | 20 |
| ENSMUSG00000001380 | Hars    | 9  | ENSMUSG00000069274 | Hist1h4f  | 20 |
| ENSMUSG00000019143 | Hars2   | 20 | ENSMUSG00000060981 | Hist1h4h  | 10 |
| ENSMUSG00000003665 | Has1    | 20 | ENSMUSG00000060639 | Hist1h4i  | 20 |
| ENSMUSG00000031910 | Has3    | 9  | ENSMUSG00000067455 | Hist1h4j  | 20 |

|                    |         |    |                    |              |    |
|--------------------|---------|----|--------------------|--------------|----|
| ENSMUSG0000027018  | Hat1    | 20 | ENSMUSG00000064288 | Hist1h4k     | 20 |
| ENSMUSG0000027285  | Haus2   | 1  | ENSMUSG00000069306 | Hist1h4m     | 20 |
| ENSMUSG0000079555  | Haus3   | 20 | ENSMUSG00000069305 | Hist1h4n     | 20 |
| ENSMUSG0000022177  | Haus4   | 20 | ENSMUSG00000063954 | Hist2h2aa2   | 18 |
| ENSMUSG0000078762  | Haus5   | 12 | ENSMUSG00000063689 | Hist2h2ab    | 20 |
| ENSMUSG0000038047  | Haus6   | 20 | ENSMUSG00000068855 | Hist2h2ac    | 19 |
| ENSMUSG0000031371  | Haus7   | 20 | ENSMUSG00000105827 | Hist2h2bb    | 20 |
| ENSMUSG0000035439  | Haus8   | 20 | ENSMUSG00000068854 | Hist2h2be    | 20 |
| ENSMUSG0000020399  | Havcr2  | 20 | ENSMUSG00000074403 | Hist2h3b     | 18 |
| ENSMUSG0000027944  | Hax1    | 20 | ENSMUSG00000081058 | Hist2h3c2    | 20 |
| ENSMUSG0000069919  | Hba-a1  | 20 | ENSMUSG00000091405 | Hist2h4      | 9  |
| ENSMUSG0000069917  | Hba-a2  | 20 | ENSMUSG00000078851 | Hist3h2a     | 20 |
| ENSMUSG0000052305  | Hbb-bs  | 20 | ENSMUSG00000056895 | Hist3h2ba    | 20 |
| ENSMUSG0000024486  | Hbegf   | 9  | ENSMUSG00000080712 | Hist3h2bb-ps | 20 |
| ENSMUSG0000002996  | Hbp1    | 20 | ENSMUSG00000096010 | Hist4h4      | 20 |
| ENSMUSG00000019977 | Hbs1l   | 2  | ENSMUSG00000021366 | Hivep1       | 18 |
| ENSMUSG00000031352 | Hccs    | 20 | ENSMUSG00000015501 | Hivep2       | 2  |
| ENSMUSG00000031386 | Hcfc1   | 20 | ENSMUSG00000028634 | Hivep3       | 3  |
| ENSMUSG00000023904 | Hcfc1r1 | 20 | ENSMUSG00000044783 | Hjurp        | 20 |
| ENSMUSG00000020246 | Hcfc2   | 20 | ENSMUSG00000037012 | Hk1          | 3  |
| ENSMUSG00000006127 | Inpp5k  | 20 | ENSMUSG00000085347 | Hk1os        | 20 |
| ENSMUSG00000032737 | Inpl1   | 16 | ENSMUSG00000000628 | Hk2          | 20 |
| ENSMUSG00000048782 | Insc    | 20 | ENSMUSG00000025877 | Hk3          | 20 |
| ENSMUSG00000045294 | Insig1  | 1  | ENSMUSG00000020080 | Hkdc1        | 20 |
| ENSMUSG00000003721 | Insig2  | 20 | ENSMUSG00000040820 | Hlcs         | 20 |
| ENSMUSG00000066090 | Insl5   | 12 | ENSMUSG00000003949 | Hlf          | 18 |
| ENSMUSG00000050957 | Insl6   | 12 | ENSMUSG00000002428 | Hltf         | 10 |
| ENSMUSG00000068154 | Insm1   | 20 | ENSMUSG00000039377 | Hlx          | 20 |
| ENSMUSG00000005534 | Insr    | 20 | ENSMUSG00000098439 | Hm629797     | 20 |
| ENSMUSG00000005640 | Insrr   | 20 | ENSMUSG00000021972 | Hmbox1       | 12 |
| ENSMUSG00000066607 | Insyn1  | 9  | ENSMUSG00000032126 | Hmbs         | 1  |
| ENSMUSG00000073805 | Insyn2a | 20 | ENSMUSG00000030060 | Hmces        | 20 |
| ENSMUSG00000069911 | Insyn2b | 9  | ENSMUSG00000066842 | Hmcn1        | 12 |
| ENSMUSG00000029547 | Ints1   | 12 | ENSMUSG00000055632 | Hmcn2        | 20 |
| ENSMUSG00000031864 | Ints10  | 20 | ENSMUSG00000032329 | Hmg20a       | 20 |
| ENSMUSG00000029034 | Ints11  | 20 | ENSMUSG00000020232 | Hmg20b       | 20 |
| ENSMUSG00000028016 | Ints12  | 20 | ENSMUSG00000046711 | Hmga1        | 18 |
| ENSMUSG00000040250 | Ints13  | 20 | ENSMUSG00000078249 | Hmga1b       | 11 |
| ENSMUSG00000034263 | Ints14  | 20 | ENSMUSG00000066551 | Hmgb1        | 20 |
| ENSMUSG00000018068 | Ints2   | 20 | ENSMUSG00000084129 | Hmgb1-ps1    | 5  |
| ENSMUSG00000027933 | Ints3   | 20 | ENSMUSG00000081738 | Hmgb1-ps2    | 20 |
| ENSMUSG00000025133 | Ints4   | 20 | ENSMUSG00000083822 | Hmgb1-ps5    | 20 |
| ENSMUSG00000071652 | Ints5   | 20 | ENSMUSG00000080928 | Hmgb1-ps6    | 20 |
| ENSMUSG00000035161 | Ints6   | 1  | ENSMUSG00000092281 | Hmgb1-ps7    | 9  |
| ENSMUSG00000035967 | Ints6l  | 3  | ENSMUSG00000097295 | Hmgb1-ps8    | 1  |
| ENSMUSG00000037461 | Ints7   | 9  | ENSMUSG00000096722 | Hmgb1-ps9    | 20 |
| ENSMUSG00000040738 | Ints8   | 1  | ENSMUSG00000099773 | Hmgb1-rs16   | 20 |
| ENSMUSG00000021975 | Ints9   | 13 | ENSMUSG00000109750 | Hmgb1-rs17   | 20 |
| ENSMUSG00000028344 | Invs    | 12 | ENSMUSG00000054717 | Hmgb2        | 20 |
| ENSMUSG00000032594 | Ip6k1   | 20 | ENSMUSG00000015217 | Hmgb3        | 20 |
| ENSMUSG00000032599 | Ip6k2   | 20 | ENSMUSG00000085717 | Hmgb4os      | 20 |
| ENSMUSG00000024210 | Ip6k3   | 20 | ENSMUSG00000028672 | Hmgcl        | 12 |
| ENSMUSG00000064065 | Ipcef1  | 1  | ENSMUSG00000007908 | Hmgcll1      | 20 |
| ENSMUSG00000060733 | Ipmk    | 10 | ENSMUSG00000021670 | Hmgrcr       | 20 |
| ENSMUSG00000042590 | Ipo11   | 7  | ENSMUSG00000093930 | Hmgcs1       | 19 |

|                    |          |    |                    |           |    |
|--------------------|----------|----|--------------------|-----------|----|
| ENSMUSG00000033365 | lpo13    | 20 | ENSMUSG00000027875 | Hmgcs2    | 19 |
| ENSMUSG00000002319 | lpo4     | 3  | ENSMUSG00000040681 | Hmgn1     | 9  |
| ENSMUSG00000030662 | lpo5     | 12 | ENSMUSG00000003038 | Hmgn2     | 19 |
| ENSMUSG00000066232 | lpo7     | 3  | ENSMUSG00000079067 | Hmgn2-ps1 | 20 |
| ENSMUSG00000040029 | lpo8     | 2  | ENSMUSG00000066456 | Hmgn3     | 20 |
| ENSMUSG00000041879 | lpo9     | 9  | ENSMUSG00000031245 | Hmgn5     | 20 |
| ENSMUSG00000028696 | lpp      | 20 | ENSMUSG00000024622 | Hmgxb3    | 7  |
| ENSMUSG00000021385 | lppk     | 9  | ENSMUSG00000034518 | Hmgxb4    | 12 |
| ENSMUSG00000102018 | lqank1   | 20 | ENSMUSG00000020330 | Hmmr      | 13 |
| ENSMUSG00000026301 | lqca     | 14 | ENSMUSG00000005413 | Hmox1     | 20 |
| ENSMUSG00000022837 | lqcb1    | 20 | ENSMUSG00000004070 | Hmox2     | 3  |
| ENSMUSG00000040795 | lqcc     | 20 | ENSMUSG00000020679 | Hnf1b     | 20 |
| ENSMUSG00000029601 | lqcd     | 14 | ENSMUSG00000026986 | Hnmt      | 20 |
| ENSMUSG00000036555 | lqce     | 20 | ENSMUSG00000007836 | Hnrnpa0   | 20 |
| ENSMUSG00000035578 | lqcg     | 14 | ENSMUSG00000046434 | Hnrnpa1   | 9  |
| ENSMUSG00000051777 | lqcj     | 20 | ENSMUSG00000004980 | Hnrnpa2b1 | 20 |
| ENSMUSG00000073856 | lqck     | 20 | ENSMUSG00000059005 | Hnrnpa3   | 20 |
| ENSMUSG00000031620 | lqcm     | 12 | ENSMUSG00000020358 | Hnrnpab   | 20 |
| ENSMUSG00000030536 | lqgap1   | 12 | ENSMUSG00000060373 | Hnrnpc    | 18 |
| ENSMUSG00000021676 | lqgap2   | 9  | ENSMUSG00000000568 | Hnrnpd    | 20 |
| ENSMUSG00000028068 | lqgap3   | 20 | ENSMUSG00000029328 | Hnrnpdl   | 20 |
| ENSMUSG00000034312 | lqsec1   | 16 | ENSMUSG00000042079 | Hnrnpf    | 20 |
| ENSMUSG00000041115 | lqsec2   | 9  | ENSMUSG00000007850 | Hnrnp1    | 18 |
| ENSMUSG00000040797 | lqsec3   | 12 | ENSMUSG00000045427 | Hnrnp2    | 1  |
| ENSMUSG00000046192 | lqub     | 1  | ENSMUSG00000020069 | Hnrnp3    | 12 |
| ENSMUSG00000031392 | lrak1    | 20 | ENSMUSG00000021546 | Hnrnpk    | 20 |
| ENSMUSG00000032251 | lrak1bp1 | 18 | ENSMUSG00000015165 | Hnrnpl    | 20 |
| ENSMUSG00000060477 | lrak2    | 20 | ENSMUSG00000024095 | Hnrnp11   | 7  |
| ENSMUSG00000020227 | lrak3    | 20 | ENSMUSG00000059208 | Hnrnpm    | 18 |
| ENSMUSG00000059883 | lrak4    | 20 | ENSMUSG00000066037 | Hnrnpr    | 9  |
| ENSMUSG00000032293 | lreb2    | 20 | ENSMUSG00000039630 | Hnrnpu    | 20 |
| ENSMUSG00000018899 | lrf1     | 20 | ENSMUSG00000040725 | Hnrnpul1  | 20 |
| ENSMUSG00000031627 | lrf2     | 20 | ENSMUSG00000071659 | Hnrnpul2  | 20 |
| ENSMUSG00000044030 | lrf2bp1  | 20 | ENSMUSG00000025176 | Hoga1     | 20 |
| ENSMUSG00000051495 | lrf2bp2  | 20 | ENSMUSG00000007617 | Homer1    | 9  |
| ENSMUSG00000034168 | lrf2bpl  | 12 | ENSMUSG00000025813 | Homer2    | 19 |
| ENSMUSG00000003184 | lrf3     | 20 | ENSMUSG00000003573 | Homer3    | 5  |
| ENSMUSG00000029771 | lrf5     | 20 | ENSMUSG00000057156 | Homez     | 20 |
| ENSMUSG00000026638 | lrf6     | 20 | ENSMUSG00000028572 | Hook1     | 15 |
| ENSMUSG00000025498 | lrf7     | 9  | ENSMUSG00000052566 | Hook2     | 9  |
| ENSMUSG00000041515 | lrf8     | 20 | ENSMUSG00000037234 | Hook3     | 19 |
| ENSMUSG00000002325 | lrf9     | 20 | ENSMUSG00000059325 | Hopx      | 3  |
| ENSMUSG00000046879 | lrgm1    | 20 | ENSMUSG00000087658 | Hotairm1  | 1  |
| ENSMUSG00000069874 | lrgm2    | 20 | ENSMUSG00000022484 | Hoxc10    | 1  |
| ENSMUSG00000041037 | lrgq     | 3  | ENSMUSG00000075394 | Hoxc4     | 1  |
| ENSMUSG00000055980 | lrs1     | 9  | ENSMUSG00000022485 | Hoxc5     | 1  |
| ENSMUSG00000038894 | lrs2     | 18 | ENSMUSG00000001661 | Hoxc6     | 1  |
| ENSMUSG00000054667 | lrs4     | 17 | ENSMUSG00000001657 | Hoxc8     | 1  |
| ENSMUSG00000060969 | lrx1     | 6  | ENSMUSG00000036139 | Hoxc9     | 1  |
| ENSMUSG00000001504 | lrx2     | 18 | ENSMUSG00000027102 | Hoxd8     | 1  |
| ENSMUSG00000031734 | lrx3     | 18 | ENSMUSG00000028759 | Hp1bp3    | 18 |
| ENSMUSG00000031737 | lrx5     | 3  | ENSMUSG00000028785 | Hpca      | 9  |
| ENSMUSG00000044792 | lsca1    | 1  | ENSMUSG00000071379 | Hpcal1    | 2  |
| ENSMUSG00000021241 | lsca2    | 2  | ENSMUSG00000046093 | Hpcal4    | 18 |
| ENSMUSG00000025825 | lscu     | 12 | ENSMUSG00000043155 | Hpdl      | 20 |

|                   |          |    |                    |           |    |
|-------------------|----------|----|--------------------|-----------|----|
| ENSMUSG0000035692 | lsg15    | 20 | ENSMUSG0000038005  | Hpf1      | 20 |
| ENSMUSG0000039236 | lsg20    | 20 | ENSMUSG0000031613  | Hpgd      | 20 |
| ENSMUSG0000048039 | lsg20l2  | 20 | ENSMUSG0000029919  | Hpgds     | 20 |
| ENSMUSG0000042258 | lsl1     | 20 | ENSMUSG0000001249  | Hpn       | 1  |
| ENSMUSG0000037206 | lslr     | 13 | ENSMUSG0000025630  | Hprt      | 20 |
| ENSMUSG0000051243 | lslr2    | 18 | ENSMUSG0000025188  | Hps1      | 20 |
| ENSMUSG0000074766 | lsm1     | 20 | ENSMUSG0000027615  | Hps3      | 20 |
| ENSMUSG0000024601 | lsoc1    | 20 | ENSMUSG0000042328  | Hps4      | 20 |
| ENSMUSG0000086784 | lsoc2a   | 20 | ENSMUSG0000014418  | Hps5      | 6  |
| ENSMUSG0000052605 | lsoc2b   | 20 | ENSMUSG0000074811  | Hps6      | 9  |
| ENSMUSG0000031729 | lst1     | 20 | ENSMUSG0000022096  | Hr        | 18 |
| ENSMUSG0000030056 | lsy1     | 20 | ENSMUSG0000025499  | Hras      | 9  |
| ENSMUSG0000019139 | lsyna1   | 20 | ENSMUSG0000071001  | Hrct1     | 20 |
| ENSMUSG0000027598 | ltch     | 2  | ENSMUSG0000053004  | Hrh1      | 9  |
| ENSMUSG0000031703 | ltfg1    | 9  | ENSMUSG0000034987  | Hrh2      | 9  |
| ENSMUSG0000001518 | ltfg2    | 9  | ENSMUSG0000039059  | Hrh3      | 1  |
| ENSMUSG0000042284 | ltga1    | 20 | ENSMUSG0000046607  | Hrk       | 9  |
| ENSMUSG0000090210 | ltga10   | 1  | ENSMUSG0000020605  | Hs1bp3    | 20 |
| ENSMUSG0000032243 | ltga11   | 20 | ENSMUSG0000040151  | Hs2st1    | 7  |
| ENSMUSG0000015533 | ltga2    | 20 | ENSMUSG0000051022  | Hs3st1    | 9  |
| ENSMUSG0000034664 | ltga2b   | 20 | ENSMUSG0000046321  | Hs3st2    | 9  |
| ENSMUSG0000001507 | ltga3    | 18 | ENSMUSG0000047759  | Hs3st3a1  | 20 |
| ENSMUSG0000027009 | ltga4    | 19 | ENSMUSG0000070407  | Hs3st3b1  | 20 |
| ENSMUSG0000000555 | ltga5    | 9  | ENSMUSG0000078591  | Hs3st4    | 20 |
| ENSMUSG0000027111 | ltga6    | 20 | ENSMUSG0000044499  | Hs3st5    | 9  |
| ENSMUSG0000025348 | ltga7    | 5  | ENSMUSG0000045216  | Hs6st1    | 3  |
| ENSMUSG0000026768 | ltga8    | 5  | ENSMUSG0000062184  | Hs6st2    | 20 |
| ENSMUSG0000039115 | ltga9    | 1  | ENSMUSG0000053465  | Hs6st3    | 20 |
| ENSMUSG0000070369 | ltgad    | 20 | ENSMUSG0000031839  | Hsbp1     | 12 |
| ENSMUSG0000005947 | ltgae    | 20 | ENSMUSG0000078963  | Hsbp1l1   | 20 |
| ENSMUSG0000030830 | ltgal    | 20 | ENSMUSG0000043510  | Hscb      | 20 |
| ENSMUSG0000030786 | ltgam    | 10 | ENSMUSG0000016194  | Hsd11b1   | 19 |
| ENSMUSG0000027087 | ltgav    | 2  | ENSMUSG0000025260  | Hsd17b10  | 3  |
| ENSMUSG0000030789 | ltgax    | 20 | ENSMUSG0000029311  | Hsd17b11  | 20 |
| ENSMUSG0000025809 | ltgb1    | 20 | ENSMUSG0000027195  | Hsd17b12  | 9  |
| ENSMUSG0000062352 | ltgb1bp1 | 19 | ENSMUSG0000024507  | Hsd17b4   | 20 |
| ENSMUSG0000031312 | ltgb1bp2 | 20 | ENSMUSG0000026675  | Hsd17b7   | 1  |
| ENSMUSG0000000290 | ltgb2    | 20 | ENSMUSG0000042289  | Hsd3b7    | 20 |
| ENSMUSG0000020689 | ltgb3    | 20 | ENSMUSG0000034189  | Hsd1      | 3  |
| ENSMUSG0000020758 | ltgb4    | 16 | ENSMUSG0000028383  | Hsd12     | 20 |
| ENSMUSG0000022817 | ltgb5    | 20 | ENSMUSG0000022556  | Hsf1      | 5  |
| ENSMUSG0000001281 | ltgb7    | 20 | ENSMUSG0000019878  | Hsf2      | 2  |
| ENSMUSG0000025321 | ltgb8    | 20 | ENSMUSG0000033249  | Hsf4      | 18 |
| ENSMUSG0000032925 | ltgb1    | 1  | ENSMUSG0000070345  | Hsf5      | 20 |
| ENSMUSG0000037254 | ltih2    | 20 | ENSMUSG0000078915  | Hsp25-ps1 | 19 |
| ENSMUSG0000006522 | ltih3    | 20 | ENSMUSG0000021270  | Hsp90aa1  | 9  |
| ENSMUSG0000025780 | ltih5    | 18 | ENSMUSG0000023944  | Hsp90ab1  | 20 |
| ENSMUSG0000020395 | ltk      | 12 | ENSMUSG0000020048  | Hsp90b1   | 1  |
| ENSMUSG0000031239 | ltm2a    | 20 | ENSMUSG0000025092  | Hspa12a   | 19 |
| ENSMUSG0000022108 | ltm2b    | 12 | ENSMUSG0000074793  | Hspa12b   | 20 |
| ENSMUSG0000026223 | ltm2c    | 3  | ENSMUSG0000032932  | Hspa13    | 1  |
| ENSMUSG0000074797 | ltpa     | 1  | ENSMUSG00000109865 | Hspa14    | 20 |
| ENSMUSG0000081476 | ltpa-ps1 | 13 | ENSMUSG0000091971  | Hspa1a    | 20 |
| ENSMUSG0000057963 | ltpk1    | 20 | ENSMUSG0000090877  | Hspa1b    | 11 |
| ENSMUSG0000027296 | ltpka    | 3  | ENSMUSG0000059970  | Hspa2     | 4  |



|                    |          |    |                    |              |    |
|--------------------|----------|----|--------------------|--------------|----|
| ENSMUSG0000038855  | ltpkb    | 18 | ENSMUSG00000020361 | Hspa4        | 20 |
| ENSMUSG0000003752  | ltpkc    | 20 | ENSMUSG00000025757 | Hspa4l       | 20 |
| ENSMUSG00000030102 | ltp1     | 9  | ENSMUSG00000026864 | Hspa5        | 20 |
| ENSMUSG00000030287 | ltp2     | 3  | ENSMUSG00000015656 | Hspa8        | 1  |
| ENSMUSG00000042644 | ltp3     | 18 | ENSMUSG00000024359 | Hspa9        | 20 |
| ENSMUSG00000027007 | ltp2id   | 20 | ENSMUSG00000004951 | Hspb1        | 20 |
| ENSMUSG00000117975 | ltprip   | 20 | ENSMUSG00000063172 | Hspb11       | 12 |
| ENSMUSG00000074825 | ltpripl1 | 20 | ENSMUSG00000036854 | Hspb6        | 20 |
| ENSMUSG00000095115 | ltpripl2 | 20 | ENSMUSG00000041548 | Hspb8        | 3  |
| ENSMUSG00000022957 | ltsn1    | 18 | ENSMUSG00000022849 | Hspbap1      | 20 |
| ENSMUSG00000020640 | ltsn2    | 2  | ENSMUSG00000063802 | Hspb1p1      | 3  |
| ENSMUSG00000027332 | lvd      | 2  | ENSMUSG00000025980 | Hspd1        | 20 |
| ENSMUSG00000023150 | lvns1abp | 9  | ENSMUSG00000058809 | Hspd1-ps3    | 18 |
| ENSMUSG00000024384 | lws1     | 20 | ENSMUSG00000073676 | Hspe1        | 12 |
| ENSMUSG00000019762 | lyd      | 18 | ENSMUSG00000117621 | Hspe1-rs1    | 20 |
| ENSMUSG00000055862 | lzumo4   | 20 | ENSMUSG00000028763 | Hspg2        | 13 |
| ENSMUSG00000025764 | Jade1    | 20 | ENSMUSG00000029657 | Hsph1        | 20 |
| ENSMUSG00000020387 | Jade2    | 1  | ENSMUSG00000039745 | Htatip2      | 18 |
| ENSMUSG00000037315 | Jade3    | 12 | ENSMUSG00000067873 | Htatsf1      | 9  |
| ENSMUSG00000027276 | Jag1     | 1  | ENSMUSG00000021721 | Htr1a        | 5  |
| ENSMUSG00000002799 | Jag2     | 20 | ENSMUSG00000049511 | Htr1b        | 9  |
| ENSMUSG00000051256 | Jagn1    | 20 | ENSMUSG00000070687 | Htr1d        | 9  |
| ENSMUSG00000028530 | Jak1     | 20 | ENSMUSG00000050783 | Htr1f        | 1  |
| ENSMUSG00000024789 | Jak2     | 9  | ENSMUSG00000034997 | Htr2a        | 9  |
| ENSMUSG00000031805 | Jak3     | 20 | ENSMUSG00000041380 | Htr2c        | 20 |
| ENSMUSG00000063646 | Jakmip1  | 9  | ENSMUSG00000032269 | Htr3a        | 20 |
| ENSMUSG00000024502 | Jakmip2  | 20 | ENSMUSG00000026322 | Htr4         | 9  |
| ENSMUSG00000056856 | Jakmip3  | 20 | ENSMUSG00000039106 | Htr5a        | 20 |
| ENSMUSG00000053062 | Jam2     | 18 | ENSMUSG00000050534 | Htr5b        | 20 |
| ENSMUSG00000031990 | Jam3     | 9  | ENSMUSG00000028747 | Htr6         | 9  |
| ENSMUSG00000038518 | Jarid2   | 20 | ENSMUSG00000024798 | Htr7         | 17 |
| ENSMUSG00000063568 | Jazf1    | 20 | ENSMUSG00000006205 | Htra1        | 1  |
| ENSMUSG00000033960 | Jcad     | 9  | ENSMUSG00000068329 | Htra2        | 12 |
| ENSMUSG00000067149 | Jchain   | 19 | ENSMUSG00000029096 | Htra3        | 20 |
| ENSMUSG00000034271 | Jdp2     | 9  | ENSMUSG00000029104 | Htt          | 8  |
| ENSMUSG00000032023 | Jhy      | 9  | ENSMUSG00000053414 | Hunk         | 5  |
| ENSMUSG00000005078 | Jkamp    | 20 | ENSMUSG00000020413 | Hus1         | 20 |
| ENSMUSG00000037876 | Jmjd1c   | 2  | ENSMUSG00000076430 | Hus1b        | 20 |
| ENSMUSG00000036819 | Jmjd4    | 16 | ENSMUSG00000025261 | Huwe1        | 3  |
| ENSMUSG00000056962 | Jmjd6    | 20 | ENSMUSG00000064267 | Hvcn1        | 9  |
| ENSMUSG00000098789 | Jmjd7    | 9  | ENSMUSG00000010051 | Hyal1        | 20 |
| ENSMUSG00000025736 | Jmjd8    | 20 | ENSMUSG00000010047 | Hyal2        | 20 |
| ENSMUSG00000021690 | Jmy      | 2  | ENSMUSG00000059854 | Hydin        | 14 |
| ENSMUSG00000022426 | Josd1    | 20 | ENSMUSG00000006395 | Hyi          | 20 |
| ENSMUSG00000038695 | Josd2    | 2  | ENSMUSG00000035878 | Hykk         | 20 |
| ENSMUSG00000042686 | Jph1     | 9  | ENSMUSG00000050555 | Hyls1        | 20 |
| ENSMUSG00000017817 | Jph2     | 20 | ENSMUSG00000032115 | Hyou1        | 12 |
| ENSMUSG00000074896 | lfit3    | 20 | ENSMUSG00000027245 | Hypk         | 20 |
| ENSMUSG00000062488 | lfit3b   | 20 | ENSMUSG00000040456 | Hypm         | 9  |
| ENSMUSG00000045777 | lfitm10  | 20 | ENSMUSG00000116504 | I730030J21Ri | 20 |
| ENSMUSG00000060591 | lfitm2   | 20 | ENSMUSG00000074342 | I830077J02Ri | 20 |
| ENSMUSG00000025492 | lfitm3   | 13 | ENSMUSG00000062054 | lah1         | 20 |
| ENSMUSG00000065968 | lfitm7   | 20 | ENSMUSG00000037851 | lars         | 18 |
| ENSMUSG00000022967 | lfnar1   | 1  | ENSMUSG00000026618 | lars2        | 9  |
| ENSMUSG00000022971 | lfnar2   | 20 | ENSMUSG00000049287 | lba57        | 20 |

|                    |         |    |                    |          |    |
|--------------------|---------|----|--------------------|----------|----|
| ENSMUSG0000020009  | lfngr1  | 20 | ENSMUSG00000035941 | lbtck    | 20 |
| ENSMUSG0000022965  | lfngr2  | 1  | ENSMUSG00000062995 | lca1     | 20 |
| ENSMUSG00000062157 | lfnlr1  | 20 | ENSMUSG00000026018 | lca1l    | 20 |
| ENSMUSG00000001627 | lfrd1   | 20 | ENSMUSG00000037405 | lcam1    | 20 |
| ENSMUSG00000010048 | lfrd2   | 20 | ENSMUSG00000001029 | lcam2    | 20 |
| ENSMUSG00000030323 | lft122  | 20 | ENSMUSG00000032174 | lcam5    | 18 |
| ENSMUSG00000024169 | lft140  | 20 | ENSMUSG00000034525 | lce1     | 1  |
| ENSMUSG00000038564 | lft172  | 20 | ENSMUSG00000032235 | lce2     | 20 |
| ENSMUSG00000001105 | lft20   | 20 | ENSMUSG00000009828 | lck      | 18 |
| ENSMUSG00000007987 | lft22   | 20 | ENSMUSG00000039662 | lcmt     | 20 |
| ENSMUSG00000016637 | lft27   | 2  | ENSMUSG00000000732 | lcosl    | 20 |
| ENSMUSG00000007867 | lft43   | 20 | ENSMUSG00000042745 | ld1      | 20 |
| ENSMUSG00000002031 | lft46   | 20 | ENSMUSG00000020644 | ld2      | 3  |
| ENSMUSG00000017858 | lft52   | 20 | ENSMUSG00000007872 | ld3      | 20 |
| ENSMUSG00000032965 | lft57   | 20 | ENSMUSG00000021379 | ld4      | 1  |
| ENSMUSG00000028576 | lft74   | 20 | ENSMUSG00000025950 | ldh1     | 20 |
| ENSMUSG00000027778 | lft80   | 20 | ENSMUSG00000030541 | ldh2     | 3  |
| ENSMUSG00000029469 | lft81   | 1  | ENSMUSG00000032279 | ldh3a    | 9  |
| ENSMUSG00000040040 | lft88   | 20 | ENSMUSG00000027406 | ldh3b    | 2  |
| ENSMUSG00000086486 | lft88os | 20 | ENSMUSG00000002010 | ldh3g    | 20 |
| ENSMUSG00000031221 | lgbp1   | 20 | ENSMUSG00000058258 | ldi1     | 19 |
| ENSMUSG00000032394 | lgdcc3  | 20 | ENSMUSG00000050002 | ldnk     | 9  |
| ENSMUSG00000032816 | lgdcc4  | 18 | ENSMUSG00000031551 | ldo1     | 3  |
| ENSMUSG00000020053 | lgf1    | 18 | ENSMUSG00000031549 | ldo2     | 20 |
| ENSMUSG00000005533 | lgf1r   | 20 | ENSMUSG00000035847 | lds      | 1  |
| ENSMUSG00000048583 | lgf2    | 13 | ENSMUSG00000033540 | ldua     | 1  |
| ENSMUSG00000033581 | lgf2bp2 | 20 | ENSMUSG00000053560 | ler2     | 20 |
| ENSMUSG00000029814 | lgf2bp3 | 20 | ENSMUSG00000003541 | ler3     | 20 |
| ENSMUSG00000023830 | lgf2r   | 12 | ENSMUSG00000090000 | ler3ip1  | 12 |
| ENSMUSG00000039323 | lgfbp2  | 13 | ENSMUSG00000056708 | ler5     | 9  |
| ENSMUSG00000020427 | lgfbp3  | 20 | ENSMUSG00000089762 | ler5l    | 1  |
| ENSMUSG00000017493 | lgfbp4  | 9  | ENSMUSG00000038271 | lffo1    | 20 |
| ENSMUSG00000026185 | lgfbp5  | 6  | ENSMUSG00000041025 | lffo2    | 20 |
| ENSMUSG00000023046 | lgfbp6  | 19 | ENSMUSG00000039997 | lfi203   | 20 |
| ENSMUSG00000036256 | lgfbp7  | 13 | ENSMUSG00000073489 | lfi204   | 20 |
| ENSMUSG00000035551 | lgfbpl1 | 20 | ENSMUSG00000043263 | lfi209   | 20 |
| ENSMUSG00000051985 | lgfn1   | 13 | ENSMUSG00000064215 | lfi27    | 13 |
| ENSMUSG00000076617 | lghm    | 9  | ENSMUSG00000079017 | lfi27l2a | 12 |
| ENSMUSG00000024831 | lghmbp2 | 20 | ENSMUSG00000021208 | lfi27l2b | 1  |
| ENSMUSG00000110185 | lgip    | 20 | ENSMUSG00000010358 | lfi35    | 20 |
| ENSMUSG00000013367 | lglon5  | 18 | ENSMUSG00000028037 | lfi44    | 20 |
| ENSMUSG00000031111 | lgsf1   | 6  | ENSMUSG00000026896 | lfi44    | 20 |
| ENSMUSG00000036334 | lgsf10  | 17 | ENSMUSG00000034459 | lfit1    | 20 |
| ENSMUSG00000022790 | lgsf11  | 9  | ENSMUSG00000079339 | lfit1bl1 | 20 |
| ENSMUSG00000040972 | lgsf21  | 20 | ENSMUSG00000067297 | lfit1bl2 | 20 |
| ENSMUSG00000042035 | lgsf3   | 20 | ENSMUSG00000045932 | lfit2    | 20 |
| ENSMUSG00000000159 | lgsf5   | 20 | ENSMUSG00000037679 | lfn2     | 9  |
| ENSMUSG00000035004 | lgsf6   | 20 | ENSMUSG00000045969 | lng1     | 20 |
| ENSMUSG00000038034 | lgsf8   | 2  | ENSMUSG00000063049 | lng2     | 20 |
| ENSMUSG00000037995 | lgsf9   | 1  | ENSMUSG00000029670 | lng3     | 20 |
| ENSMUSG00000034275 | lgsf9b  | 18 | ENSMUSG00000030330 | lng4     | 20 |
| ENSMUSG00000078853 | lgtp    | 20 | ENSMUSG00000026283 | lng5     | 20 |
| ENSMUSG00000054072 | ligp1   | 20 | ENSMUSG00000032968 | lnha     | 3  |
| ENSMUSG00000024474 | lk      | 20 | ENSMUSG00000041324 | lnhba    | 9  |
| ENSMUSG00000019975 | lkbip   | 20 | ENSMUSG00000037035 | lnhbb    | 20 |

|                    |         |    |                    |           |    |
|--------------------|---------|----|--------------------|-----------|----|
| ENSMUSG00000031537 | lkbkb   | 20 | ENSMUSG00000038544 | lnip      | 20 |
| ENSMUSG00000042349 | lkbke   | 20 | ENSMUSG00000042106 | lnka1     | 20 |
| ENSMUSG00000004221 | lkbkg   | 20 | ENSMUSG00000048458 | lnka2     | 9  |
| ENSMUSG00000018654 | lkzf1   | 20 | ENSMUSG00000003477 | lnmt      | 20 |
| ENSMUSG00000025997 | lkzf2   | 20 | ENSMUSG00000034154 | lno80     | 20 |
| ENSMUSG00000018168 | lkzf3   | 19 | ENSMUSG00000030034 | lno80b    | 3  |
| ENSMUSG00000002578 | lkzf4   | 20 | ENSMUSG00000047989 | lno80c    | 12 |
| ENSMUSG00000040167 | lkzf5   | 20 | ENSMUSG00000040865 | lno80d    | 2  |
| ENSMUSG00000032089 | ll10ra  | 20 | ENSMUSG00000084799 | lno80dos  | 20 |
| ENSMUSG00000022969 | ll10rb  | 20 | ENSMUSG00000030689 | lno80e    | 20 |
| ENSMUSG00000073889 | ll11ra1 | 1  | ENSMUSG00000026102 | lnpp1     | 19 |
| ENSMUSG00000018341 | ll12rb2 | 20 | ENSMUSG00000026113 | lnpp4a    | 2  |
| ENSMUSG00000017057 | ll13ra1 | 1  | ENSMUSG00000037940 | lnpp4b    | 18 |
| ENSMUSG00000031712 | ll15    | 20 | ENSMUSG00000025477 | lnpp5a    | 20 |
| ENSMUSG00000023206 | ll15ra  | 20 | ENSMUSG00000028894 | lnpp5b    | 9  |
| ENSMUSG00000001741 | ll16    | 5  | ENSMUSG00000026288 | lnpp5d    | 20 |
| ENSMUSG00000024578 | ll17b   | 20 | ENSMUSG00000026925 | lnpp5e    | 20 |
| ENSMUSG00000050222 | ll17d   | 20 | ENSMUSG00000042105 | lnpp5f    | 9  |
| ENSMUSG00000002897 | ll17ra  | 20 | ENSMUSG00000032288 | lmp3      | 19 |
| ENSMUSG00000015966 | ll17rb  | 3  | ENSMUSG00000026127 | lmp4      | 20 |
| ENSMUSG00000030281 | ll17rc  | 1  | ENSMUSG00000027531 | lmpa1     | 20 |
| ENSMUSG00000040717 | ll17rd  | 20 | ENSMUSG00000024525 | lmpa2     | 20 |
| ENSMUSG00000039217 | ll18    | 20 | ENSMUSG00000024423 | lmpact    | 17 |
| ENSMUSG00000070427 | ll18bp  | 20 | ENSMUSG00000066324 | lmpad1    | 3  |
| ENSMUSG00000027399 | ll1a    | 20 | ENSMUSG00000003500 | lmpdh1    | 20 |
| ENSMUSG00000026072 | ll1r1   | 20 | ENSMUSG00000062867 | lmpdh2    | 20 |
| ENSMUSG00000022514 | ll1rap  | 19 | ENSMUSG00000071041 | lmpdh2-ps | 20 |
| ENSMUSG00000052372 | ll1rap1 | 3  | ENSMUSG00000032343 | lmpg1     | 9  |
| ENSMUSG00000059203 | ll1rap2 | 9  | ENSMUSG00000035270 | lmpg2     | 20 |
| ENSMUSG00000026069 | ll1r1   | 20 | ENSMUSG00000034336 | lna       | 18 |
| ENSMUSG00000070942 | ll1r2   | 19 | ENSMUSG00000091811 | lnafm1    | 20 |
| ENSMUSG00000020007 | ll20ra  | 9  | ENSMUSG00000074918 | lnafm2    | 20 |
| ENSMUSG00000044244 | ll20rb  | 20 |                    |           |    |
| ENSMUSG00000030745 | ll21r   | 2  |                    |           |    |
| ENSMUSG00000005465 | ll27ra  | 20 |                    |           |    |
| ENSMUSG00000068227 | ll2rb   | 1  |                    |           |    |
| ENSMUSG00000031304 | ll2rg   | 20 |                    |           |    |
| ENSMUSG00000024810 | ll33    | 16 |                    |           |    |
| ENSMUSG00000031750 | ll34    | 9  |                    |           |    |
| ENSMUSG00000068758 | ll3ra   | 20 |                    |           |    |
| ENSMUSG00000074141 | ll4i1   | 20 |                    |           |    |
| ENSMUSG00000030748 | ll4ra   | 9  |                    |           |    |
| ENSMUSG00000025746 | ll6     | 20 |                    |           |    |
| ENSMUSG00000027947 | ll6ra   | 20 |                    |           |    |
| ENSMUSG00000021756 | ll6st   | 12 |                    |           |    |
| ENSMUSG00000003882 | ll7r    | 20 |                    |           |    |
| ENSMUSG00000040612 | lldr2   | 19 |                    |           |    |
| ENSMUSG00000001016 | llf2    | 20 |                    |           |    |
| ENSMUSG00000032178 | llf3    | 20 |                    |           |    |
| ENSMUSG00000030890 | llk     | 3  |                    |           |    |
| ENSMUSG00000026309 | llkap   | 20 |                    |           |    |
| ENSMUSG00000056692 | llrun   | 8  |                    |           |    |
| ENSMUSG00000032763 | llvbl   | 20 |                    |           |    |
| ENSMUSG00000042670 | lmp1    | 20 |                    |           |    |
| ENSMUSG00000056899 | lmp2    | 20 |                    |           |    |



**Table S2. WGCNA module names and number of genes per module**

| ModuleName   | ModuleID | NoGene | Pval(HD-HD;CK2a'+/-) | Pval(HD-WT) |
|--------------|----------|--------|----------------------|-------------|
| Blue         | 1        | 1165   | 0.9168               | 0.0472      |
| Black        | 2        | 432    | 0.3472               | 0.0163      |
| Green        | 3        | 711    | 0.4647               | 0.0090      |
| Cyan         | 4        | 107    | 0.6015               | 0.1172      |
| Greenyellow  | 5        | 255    | 0.0090               | 0.0090      |
| Salmon       | 6        | 211    | 0.1745               | 0.4647      |
| Tan          | 7        | 235    | 0.7540               | 0.1745      |
| Grey60       | 8        | 66     | 0.7540               | 0.9168      |
| Turquoise    | 9        | 2016   | 0.9168               | 0.7540      |
| Pink         | 10       | 404    | 0.6015               | 0.3472      |
| Lightyellow  | 11       | 52     | 0.9168               | 0.0472      |
| Yellow       | 12       | 994    | 0.3472               | 0.0472      |
| Magenta      | 13       | 324    | 0.9168               | 0.7540      |
| Midnightblue | 14       | 93     | 0.7540               | 0.9168      |
| Lightgreen   | 15       | 53     | 0.1172               | 0.6015      |
| Purple       | 16       | 268    | 0.2506               | 0.0472      |
| Lightcyan    | 17       | 82     | 0.1745               | 0.9168      |
| Brown        | 18       | 1067   | 0.9168               | 0.6015      |
| Red          | 19       | 639    | 0.0472               | 0.0163      |
| Grey         | 20       | 11926  | 0.0758               | 0.0163      |

**Table S4. Expression analyses for astrocyte markers of A1, A2 and pan reactive (from Liddelow et al., 2017)**

GENES ASSOCIATED WITH PAN REACTIVE, A1 AND A2 ASTROCYTES

| EnsemblID | FC_HD.WT        | P_HD.WT         | Q_HD.WT         | FC_HDHET        | P_HDHET         | Q_HDHET         | FC_HD.HD        | P_HD.HD         | Q_HD.HD         | FC_HD.HE        | P_HD.HET        | Q_HD.HET        | FC_HDHET        | P_HDHET         | Q_HDHET         | FC_HET.W        | P_HET.WT        | Q_HET.WT | GeneSymbol     |                                                     |
|-----------|-----------------|-----------------|-----------------|-----------------|-----------------|-----------------|-----------------|-----------------|-----------------|-----------------|-----------------|-----------------|-----------------|-----------------|-----------------|-----------------|-----------------|----------|----------------|-----------------------------------------------------|
| ENSMUSG   | -1.14609        | 0.160577        | NA              | -0.51943        | 0.515094        | NA              | -0.62666        | 0.451644        | 0.996027        | 0.276807        | 0.780398        | NA              | 0.903464        | 0.355314        | NA              | -1.42289        | 0.139949        | 1        | Lcn2           | P<br>A<br>N<br>R<br>E<br>A<br>C<br>T<br>I<br>V<br>E |
| ENSMUSG   | 1.790505        | 0.232362        | NA              | 2.560314        | 0.085282        | NA              | -0.76981        | 0.587928        | 1               | -0.60378        | 0.712229        | NA              | 0.166024        | 0.918696        | NA              | 2.394289        | 0.157896        | 1        | Steap4         |                                                     |
| ENSMUSG   | -0.12823        | 0.649538        | 0.867518        | -0.24247        | 0.393998        | 0.869917        | 0.114237        | 0.690479        | 1               | -0.03872        | 0.905648        | 0.978208        | -0.15296        | 0.641602        | 0.939904        | -0.08952        | 0.782683        | 1        | S1pr3          |                                                     |
| ENSMUSG   | -1.08231        | 0.473498        | NA              | -0.35739        | 0.807911        | NA              | -0.72493        | 0.636129        | 1               | -2.99215        | 0.073848        | NA              | -2.26723        | 0.1663          | NA              | 1.909843        | 0.237589        | 1        | Timp1          |                                                     |
| ENSMUSG   | -0.15143        | 0.14569         | 0.491222        | -0.1656         | 0.111857        | 0.631925        | 0.014173        | 0.891967        | 1               | -0.12115        | 0.31343         | 0.712446        | -0.13532        | 0.260442        | 0.774228        | -0.03029        | 0.800766        | 1        | Hsbp1          |                                                     |
| ENSMUSG   | -1.41815        | 0.256904        | NA              | -0.72026        | 0.550822        | NA              | -0.69789        | 0.587972        | 1               | -0.2923         | 0.844921        | NA              | 0.405597        | 0.780891        | NA              | -1.12586        | 0.429587        | 1        | Cxcl10         |                                                     |
| ENSMUSG   | -0.04361        | 0.898373        | 0.967005        | 0.130886        | 0.701001        | 0.961868        | -0.17449        | 0.609707        | 1               | -0.20838        | 0.595865        | 0.881176        | -0.03388        | 0.931193        | 0.988925        | 0.164768        | 0.67431         | 1        | Cd44           |                                                     |
| ENSMUSG   | 0.108797        | 0.72898         | 0.901614        | 0.58812         | 0.059632        | 0.523315        | -0.47932        | 0.124813        | 0.965883        | 0.311288        | 0.392855        | 0.77016         | 0.790611        | 0.029318        | 0.368578        | -0.20249        | 0.578302        | 1        | Osmr           |                                                     |
| ENSMUSG   | 0.099363        | 0.508843        | 0.797025        | 0.048157        | 0.749735        | 0.970313        | 0.051206        | 0.734593        | 1               | -0.2197         | 0.201718        | 0.606144        | -0.27091        | 0.116477        | 0.627492        | 0.319065        | 0.06363         | 1        | Cp             |                                                     |
| ENSMUSG   | -4.40929        | 0.030442        | NA              | -4.32644        | 0.033701        | NA              | 0               | 1               | 1               | -2.6608         | 0.264432        | NA              | -2.57795        | 0.279595        | NA              | -1.74849        | 0.431987        | 1        | Serpina3g      |                                                     |
| ENSMUSG   | 3.967647        | 0.077223        | NA              | 3.433971        | 0.129329        | NA              | 0.533676        | 0.800316        | 1               | 1.226066        | 0.620646        | NA              | 0.692389        | 0.781315        | NA              | 2.741582        | 0.293479        | 1        | Serpina3h      |                                                     |
| ENSMUSG   | -0.79751        | 0.759147        | NA              | -0.36524        | 0.887488        | NA              | -0.43228        | 0.86915         | 1               | 2.37176         | 0.451349        | NA              | 2.804037        | 0.370761        | NA              | -3.16927        | 0.308748        | 1        | Serpina3i      |                                                     |
| ENSMUSG   | 2.512734        | 0.340487        | NA              | 3.575762        | 0.168249        | NA              | 0.137105        | 0.672804        | 1               | 0.82375         | 0.785652        | NA              | 1.886778        | 0.528486        | NA              | 1.688984        | 0.585142        | 1        | Serpina3m      |                                                     |
| ENSMUSG   | 0.933112        | 0.067569        | 0.348361        | 0.796007        | 0.119073        | 0.643816        | 0.137105        | 0.787956        | 1               | -0.31337        | 0.594029        | 0.880253        | -0.45048        | 0.44369         | 0.878418        | 1.246486        | 0.034246        | 1        | Serpina3n      |                                                     |
| ENSMUSG   | -0.0678         | 0.624355        | 0.857131        | 0.139295        | 0.313399        | 0.832195        | -0.2071         | 0.135094        | 0.967737        | 0.205383        | 0.201412        | 0.605698        | 0.412482        | 0.010177        | 0.231486        | -0.27319        | 0.088546        | 1        | Vim            |                                                     |
| ENSMUSG   | -0.4955         | 0.07811         | 0.371649        | 0.055645        | 0.843119        | 0.981536        | -0.55115        | 0.050059        | 0.885412        | -0.50628        | 0.118986        | 0.490899        | 0.044869        | 0.890081        | 0.981797        | 0.010776        | 0.973521        | 1        | Gfap           |                                                     |
| ENSMUSG   | -0.72189        | 0.368618        | 0.70618         | -0.902          | 0.262302        | 0.798596        | 0.180102        | 0.823713        | 1               | -1.07199        | 0.246299        | 0.655329        | -1.25209        | 0.17638         | 0.701112        | 0.350098        | 0.703942        | 1        | H2-T23         | 1<br>A<br>S<br>T<br>R<br>O<br>C<br>Y<br>T<br>E<br>S |
| ENSMUSG   | 0.12642         | 0.48241         | 0.782747        | 0.455609        | 0.011137        | 0.299313        | -0.32919        | 0.066615        | 0.935832        | -0.06982        | 0.736268        | 0.930761        | 0.259366        | 0.209981        | 0.737619        | 0.196244        | 0.34389         | 1        | H2-D1          |                                                     |
| ENSMUSG   | -0.20162        | 0.467756        | 0.774615        | -0.18011        | 0.517461        | 0.912907        | -0.02151        | 0.939009        | 1               | -0.14373        | 0.654056        | 0.903021        | -0.12222        | 0.703608        | 0.95044         | -0.05789        | 0.855663        | 1        | Ggta1          |                                                     |
| ENSMUSG   | 0.069998        | 0.839507        | 0.946987        | 0.560035        | 0.101912        | 0.610901        | -0.49004        | 0.15288         | 0.97929         | -0.40636        | 0.302386        | 0.703934        | 0.083673        | 0.830628        | 0.975732        | 0.476361        | 0.226233        | 1        | Serping1       |                                                     |
| ENSMUSG   | 0.266222        | 0.421759        | 0.746781        | 0.123029        | 0.712521        | 0.964926        | 0.143193        | 0.666518        | 1               | -0.07797        | 0.836705        | 0.958365        | -0.22116        | 0.561076        | 0.915483        | 0.344194        | 0.364691        | 1        | Gbp2           |                                                     |
| ENSMUSG   | -0.62343        | 0.045665        | 0.289343        | -0.20975        | 0.497504        | 0.908343        | -0.41368        | 0.188491        | 0.979658        | -0.98433        | 0.005721        | 0.109284        | -0.57065        | 0.10674         | 0.613553        | 0.360896        | 0.304481        | 1        | Fbln5          |                                                     |
| ENSMUSG   | 0.043275        | 0.771781        | 0.919025        | 0.111505        | 0.454911        | 0.896838        | -0.06823        | 0.647742        | 1               | -0.07519        | 0.66209         | 0.906065        | -0.00696        | 0.967742        | 0.995398        | 0.118463        | 0.490854        | 1        | Fkbp5          |                                                     |
| ENSMUSG   | -0.84054        | 0.030038        | 0.245223        | 0.114671        | 0.762051        | 0.972927        | -0.95521        | 0.013821        | 0.648683        | -1.0298         | 0.020132        | 0.214269        | -0.07459        | 0.864031        | 0.978111        | 0.189256        | 0.663533        | 1        | Psmb8          |                                                     |
| ENSMUSG   | -0.30531        | 0.160581        | 0.51444         | -0.10883        | 0.614997        | 0.939091        | -0.19649        | 0.372701        | 0.996027        | -0.29768        | 0.234559        | 0.642354        | -0.1012         | 0.684883        | 0.945541        | -0.00763        | 0.975339        | 1        | Srgn           |                                                     |
| ENSMUSG   | 0.115763        | 0.697483        | 0.888776        | -0.42375        | 0.158708        | 0.693481        | 0.53951         | 0.07274         | 0.938721        | 0.39397         | 0.254363        | 0.663391        | -0.14554        | 0.675875        | 0.943916        | -0.27821        | 0.420878        | 1        | Amigo2         |                                                     |
| ENSMUSG   | -0.17675        | 0.694637        | 0.888085        | -0.69539        | 0.126893        | 0.655866        | 0.518645        | 0.256878        | 0.990064        | -0.94119        | 0.067278        | 0.388265        | -1.45984        | 0.004914        | 0.158852        | 0.764449        | 0.135948        | 1        | C3             |                                                     |
| ENSMUSG   | -0.26417        | 0.773744        | NA              | 0.71946         | 0.414296        | NA              | -0.98363        | 0.274642        | 0.99181         | -1.76392        | 0.077039        | NA              | -0.78029        | 0.417828        | NA              | 1.499753        | 0.126091        | 1        | Tgm1           |                                                     |
| ENSMUSG   | -1.58113        | 0.455925        | NA              | -1.21898        | 0.560591        | NA              | -0.36214        | 0.868959        | 1               | -1.08744        | 0.656814        | NA              | -0.7253         | 0.764859        | NA              | -0.49368        | 0.834147        | 1        | Ptx3           |                                                     |
| ENSMUSG   | <b>-1.04664</b> | <b>2.68E-05</b> | <b>0.005563</b> | <b>-1.08878</b> | <b>1.34E-05</b> | <b>0.017165</b> | <b>0.042138</b> | <b>0.86894</b>  | <b>1</b>        | <b>-1.39026</b> | <b>1.08E-06</b> | <b>0.000357</b> | <b>-1.4324</b>  | <b>5.39E-07</b> | <b>0.000446</b> | <b>0.343614</b> | <b>0.220356</b> | <b>1</b> | <b>S100a10</b> |                                                     |
| ENSMUSG   | -0.09771        | 0.90033         | NA              | 0.512506        | 0.505334        | 0.910563        | -0.61021        | 0.430625        | 0.996027        | -0.24498        | 0.784491        | NA              | 0.365235        | 0.68033         | NA              | 0.14727         | 0.868806        | 1        | Sphk1          |                                                     |
| ENSMUSG   | 0.314958        | 0.502937        | 0.7939          | -0.12158        | 0.798852        | 0.978381        | 0.436535        | 0.357835        | 0.995411        | -0.07592        | 0.887681        | 0.973916        | -0.51246        | 0.345832        | 0.831106        | 0.39088         | 0.468833        | 1        | Cd109          |                                                     |
| ENSMUSG   | <b>1.260279</b> | <b>0.002191</b> | <b>0.06471</b>  | <b>0.362463</b> | <b>0.386982</b> | <b>0.866418</b> | <b>0.897816</b> | <b>0.028387</b> | <b>0.787307</b> | <b>1.362371</b> | <b>0.004538</b> | <b>0.094917</b> | <b>0.464556</b> | <b>0.339624</b> | <b>0.826888</b> | <b>-0.10209</b> | <b>0.834304</b> | <b>1</b> | <b>Ptgs2</b>   |                                                     |
| ENSMUSG   | 0.353648        | 0.406305        | 0.73449         | 0.11733         | 0.785357        | 0.976151        | 0.236318        | 0.580209        | 1               | 0.638384        | 0.202357        | 0.607107        | 0.402066        | 0.425894        | 0.871336        | -0.28474        | 0.571929        | 1        | Emp1           |                                                     |
| ENSMUSG   | -0.11974        | 0.621289        | 0.855328        | -0.14423        | 0.553079        | 0.925041        | 0.02449         | 0.920283        | 1               | -0.65889        | 0.01682         | 0.196558        | -0.68338        | 0.013387        | 0.265386        | 0.53915         | 0.049306        | 1        | Tm4sf1         |                                                     |
| ENSMUSG   | -0.27627        | 0.747238        | NA              | 0.124371        | 0.883473        | NA              | -0.40064        | 0.640922        | 1               | 1.136303        | 0.285882        | NA              | 1.536942        | 0.146228        | NA              | -1.41257        | 0.181152        | 1        | B3gnt5         |                                                     |
| ENSMUSG   | 0.240867        | 0.594653        | 0.843206        | 0.749193        | 0.093403        | 0.592613        | -0.50833        | 0.252724        | 0.988916        | -0.52061        | 0.305617        | 0.706311        | -0.01229        | 0.980505        | 0.997073        | 0.761478        | 0.135441        | 1        | Cd14           |                                                     |

Table S5. Expression analyses for microglia markers of A1 inducing and reactive microglia (from Liddelw et al., 2017)

| EnsemblID | FC_HD.WT        | P_HD.WT         | Q_HD.WT         | FC_HDHET | P_HDHET  | Q_HDHET  | FC_HD.HD | P_HD.HDH | Q_HD.HDH | FC_HD.HE | P_HD.HET | Q_HD.HET | FC_HDHET | P_HDHET  | Q_HDHET  | FC_HET.W | P_HET.WT | Q_HET.WT | GeneSymbol |                            |                                           |
|-----------|-----------------|-----------------|-----------------|----------|----------|----------|----------|----------|----------|----------|----------|----------|----------|----------|----------|----------|----------|----------|------------|----------------------------|-------------------------------------------|
| ENSMUSG   | -0.04167        | 0.949115        | NA              | 1.018271 | 0.105641 | 0.618342 | -1.05994 | 0.094797 | 0.951321 | -0.45668 | 0.535965 | NA       | 0.603263 | 0.400121 | NA       | 0.415008 | 0.571497 | 1        | Il1a       | P<br>R<br>O<br>-<br>A<br>1 |                                           |
| ENSMUSG   | <b>-0.63462</b> | <b>4.71E-05</b> | <b>0.007512</b> | -0.17335 | 0.263496 | 0.79861  | -0.46128 | 0.00323  | 0.437304 | -0.42755 | 0.017655 | 0.200436 | 0.033725 | 0.850884 | 0.976156 | -0.20707 | 0.24681  | 1        | C1qa       |                            |                                           |
| ENSMUSG   | <b>-0.61367</b> | <b>0.000213</b> | <b>0.018214</b> | -0.27581 | 0.095037 | 0.592613 | -0.33787 | 0.042444 | 0.853397 | -0.4178  | 0.02911  | 0.259242 | -0.07993 | 0.675618 | 0.943916 | -0.19588 | 0.303464 | 1        | C1qb       |                            |                                           |
| ENSMUSG   | <b>-0.62004</b> | <b>9.93E-05</b> | <b>0.012198</b> | -0.15161 | 0.338879 | 0.849425 | -0.46843 | 0.003383 | 0.437834 | -0.29917 | 0.104589 | 0.472687 | 0.169265 | 0.356721 | 0.838338 | -0.32087 | 0.079842 | 1        | C1qc       |                            |                                           |
| ENSMUSG   | 1.975231        | 0.505055        | NA              | -1.4665  | 0.632712 | NA       | 3.441735 | 0.249047 | 0.987901 | 3.62898  | 0.296796 | NA       | 0        | 1        | NA       | -1.65375 | 0.641279 | 1        | Tnf        |                            |                                           |
| ENSMUSG   | -0.03634        | 0.885623        | 0.964622        | -0.19444 | 0.444071 | 0.89254  | 0.158098 | 0.535008 | 0.998825 | 0.105689 | 0.71806  | 0.928412 | -0.05241 | 0.858488 | 0.977027 | -0.14203 | 0.626729 | 1        | Aif1       | A<br>C<br>T<br>I<br>V<br>E |                                           |
| ENSMUSG   | -0.3124         | 0.080804        | 0.377034        | 0.102733 | 0.561606 | 0.926814 | -0.41513 | 0.020665 | 0.73565  | -0.35579 | 0.083774 | 0.427952 | 0.059347 | 0.771196 | 0.964767 | 0.043386 | 0.831295 | 1        | Cd68       |                            |                                           |
| ENSMUSG   | -0.02103        | 0.910504        | 0.971056        | 0.370591 | 0.045799 | 0.480457 | -0.39162 | 0.035542 | 0.841866 | 0.082792 | 0.702574 | 0.92183  | 0.474417 | 0.027675 | 0.361059 | -0.10383 | 0.631028 | 1        | Iltgam     |                            |                                           |
| ENSMUSG   | -0.11382        | 0.823587        | 0.939818        | 0.721624 | 0.149407 | 0.685753 | -0.83545 | 0.097543 | 0.951321 | -0.3233  | 0.580398 | 0.875162 | 0.512145 | 0.374033 | 0.848688 | 0.209479 | 0.718751 | 1        | Tlr2       |                            |                                           |
| ENSMUSG   | 0.381135        | 0.478002        | 0.781033        | 0.323282 | 0.548561 | 0.924202 | 0.057853 | 0.913968 | 1        | 0.694728 | 0.269213 | 0.677468 | 0.636875 | 0.312242 | 0.810517 | -0.31359 | 0.619569 | 1        | Tlr4       |                            |                                           |
| ENSMUSG   | 0.347073        | 0.798252        | NA              | -0.53898 | 0.697575 | NA       | 0.886049 | 0.521357 | 0.998804 | 1.727011 | 0.295975 | NA       | 0.840962 | 0.615941 | NA       | -1.37994 | 0.404923 | 1        | Il6        |                            |                                           |
| ENSMUSG   | -1.34545        | 0.332724        | NA              | -1.48827 | 0.292862 | NA       | 0.142823 | 0.924581 | 1        | -2.90993 | 0.055534 | NA       | -3.05276 | 0.047949 | NA       | 1.564483 | 0.272829 | 1        | Ccl2       |                            |                                           |
| ENSMUSG   | -1.08583        | 0.335813        | NA              | -0.23632 | 0.83223  | 0.980936 | -0.84952 | 0.453301 | 0.996027 | -0.00411 | 0.997518 | NA       | 0.845411 | 0.518303 | NA       | -1.08173 | 0.407066 | 1        | H2-Aa      |                            | M<br>I<br>C<br>R<br>O<br>G<br>L<br>I<br>A |
| ENSMUSG   | -0.80635        | 0.240393        | NA              | -1.00322 | 0.146874 | 0.683459 | 0.196874 | 0.779119 | 1        | 0.08161  | 0.919236 | NA       | -0.11526 | 0.886689 | NA       | -0.88796 | 0.264514 | 1        | H2-Ab1     |                            |                                           |
| ENSMUSG   | -0.23805        | 0.245373        | 0.607058        | 0.05548  | 0.78518  | 0.976151 | -0.29353 | 0.153676 | 0.97929  | -0.38802 | 0.098727 | 0.4611   | -0.09449 | 0.686104 | 0.94605  | 0.149974 | 0.519948 | 1        | H2-DMa     |                            |                                           |
| ENSMUSG   | -1.10964        | 0.165044        | NA              | 0.250172 | 0.743437 | NA       | -1.35982 | 0.088538 | 0.943855 | -0.73899 | 0.424087 | NA       | 0.620821 | 0.487635 | NA       | -0.37065 | 0.678857 | 1        | H2-DMb1    |                            |                                           |
| ENSMUSG   | -2.83206        | 0.001213        | NA              | -0.6804  | 0.367829 | NA       | -2.15165 | 0.015746 | 0.683595 | -1.32128 | 0.19756  | NA       | 0.830377 | 0.369534 | NA       | -1.51078 | 0.096926 | 1        | H2-DMb2    |                            |                                           |
| ENSMUSG   | -1.4041         | 0.150192        | NA              | -1.95448 | 0.049806 | NA       | 0.550381 | 0.58954  | 1        | -0.36475 | 0.749058 | NA       | -0.91513 | 0.429316 | NA       | -1.03935 | 0.352986 | 1        | H2-Eb1     |                            |                                           |
| ENSMUSG   | -1.41217        | 0.113848        | NA              | -2.24249 | 0.020591 | NA       | 0.830315 | 0.416026 | 0.996027 | -0.8705  | 0.400639 | NA       | -1.70081 | 0.122522 | NA       | -0.54167 | 0.582039 | 1        | H2-Oa      |                            |                                           |
| ENSMUSG   | -0.59732        | 0.371041        | NA              | -0.13365 | 0.839062 | 0.981536 | -0.46367 | 0.491657 | 0.996027 | -0.2387  | 0.758777 | NA       | 0.224978 | 0.769856 | NA       | -0.35863 | 0.638466 | 1        | H2-Ob      |                            |                                           |

**Table S6. Marker genes and their mean log2 fold change between zQ175 and zQ175:CK2a<sup>(+/+)</sup> mice compared to WT**

| GeneSymbol           | FC_HD.HDHE | P_HD.HDH | Q_HD.HDHET | Module WGNA | Synaptic Function | Gene description                                                                                           | Link GeneCards                                                                                                                                                                                                |
|----------------------|------------|----------|------------|-------------|-------------------|------------------------------------------------------------------------------------------------------------|---------------------------------------------------------------------------------------------------------------------------------------------------------------------------------------------------------------|
| <b>Gm30085</b>       | 4.7648641  | 8.54E-05 | 0.081847   |             |                   | Unknown                                                                                                    |                                                                                                                                                                                                               |
| <b>Grm2</b>          | 3.2378454  | 2.45E-05 | 0.039975   | 5           | YES               | Glutamate Metabotropic Receptor 2. Involved in synaptogenesis and/or synaptic stabilization                | <a href="https://www.genecards.org/cgi-bin/carddisp.pl?gene=GRM2">https://www.genecards.org/cgi-bin/carddisp.pl?gene=GRM2</a>                                                                                 |
| <b>Slc30a3</b>       | 3.091492   | 0.000123 | 0.09839    | 5           | YES               | Solute carrier family 30 member 3 (ZnT-3 family membrane transport protein)                                | <a href="https://www.genecards.org/cgi-bin/carddisp.pl?gene=SLC30A3">https://www.genecards.org/cgi-bin/carddisp.pl?gene=SLC30A3</a>                                                                           |
| <b>Gm42598</b>       | 2.8563671  | 7.11E-05 | 0.078997   | 20          |                   | Unknown                                                                                                    |                                                                                                                                                                                                               |
| <b>Gm2824</b>        | 2.2739586  | 9.18E-05 | 0.084999   | 19          |                   | Unknown                                                                                                    |                                                                                                                                                                                                               |
| <b>Slc17a7</b>       | 2.2325005  | 0.000138 | 0.09839    | 5           | YES               | Vesicular Glutamate transport VGLUT1                                                                       | <a href="https://www.genecards.org/cgi-bin/carddisp.pl?gene=SLC17A7&amp;keywords=Slc17a7">https://www.genecards.org/cgi-bin/carddisp.pl?gene=SLC17A7&amp;keywords=Slc17a7</a>                                 |
| <b>Nr4a2</b>         | 2.2250106  | 1.00E-10 | 9.26E-07   | 20          | YES               | Nuclear receptor related 1 protein (NURR1), is a member of the nuclear receptor family of intracellular    | <a href="https://www.genecards.org/cgi-bin/carddisp.pl?gene=NR4A2&amp;keywords=Nr4a2">https://www.genecards.org/cgi-bin/carddisp.pl?gene=NR4A2&amp;keywords=Nr4a2</a>                                         |
| <b>C1ql3</b>         | 1.7864526  | 3.99E-07 | 0.001865   | 5           |                   | C1q/TNF-Related Protein 3, May regulate the number of excitatory synapses that are formed on hippo         | <a href="https://www.genecards.org/cgi-bin/carddisp.pl?gene=C1QL3&amp;keywords=C1ql3">https://www.genecards.org/cgi-bin/carddisp.pl?gene=C1QL3&amp;keywords=C1ql3</a>                                         |
| <b>lqcj</b>          | 1.7861791  | 6.69E-05 | 0.077457   | 20          | YES               | Calmodulin binding motif protein                                                                           | <a href="https://www.genecards.org/cgi-bin/carddisp.pl?gene=lqcj&amp;keywords=lqcj">https://www.genecards.org/cgi-bin/carddisp.pl?gene=lqcj&amp;keywords=lqcj</a>                                             |
| <b>CZ30012017Rik</b> | 1.7844816  | 0.000134 | 0.09839    | 20          |                   | Unknown                                                                                                    |                                                                                                                                                                                                               |
| <b>Gm17807</b>       | 1.4859631  | 8.06E-05 | 0.081402   | 20          |                   | Unknown                                                                                                    |                                                                                                                                                                                                               |
| <b>Tbr1</b>          | 1.4502627  | 8.61E-06 | 0.022609   | 5           | YES               | Transcription factor protein important in vertebrate embryo development                                    | <a href="https://www.genecards.org/cgi-bin/carddisp.pl?gene=TBR1&amp;keywords=Tbr1">https://www.genecards.org/cgi-bin/carddisp.pl?gene=TBR1&amp;keywords=Tbr1</a>                                             |
| <b>Cckbr</b>         | 1.3961687  | 3.71E-06 | 0.012901   | 20          | YES               | G protein-coupled receptor for gastrin and cholecystokinin, influence neurotransmission in the brain, re   | <a href="https://www.genecards.org/cgi-bin/carddisp.pl?gene=CCKBR&amp;keywords=Cckbr">https://www.genecards.org/cgi-bin/carddisp.pl?gene=CCKBR&amp;keywords=Cckbr</a>                                         |
| <b>Vxn</b>           | 1.3540086  | 1.01E-07 | 0.000699   | 19          | YES               | Vexin, required for neurogenesis in the neural plate and retina. Strongly cooperates with neural bHLH f    | <a href="https://www.genecards.org/cgi-bin/carddisp.pl?gene=VXN&amp;keywords=Vxn">https://www.genecards.org/cgi-bin/carddisp.pl?gene=VXN&amp;keywords=Vxn</a>                                                 |
| <b>Col5a1</b>        | 1.3206734  | 0.000117 | 0.09839    | 16          |                   | Collagen Type V Alpha 1 Chain, provides instructions for making a component of type V collagen             | <a href="https://www.genecards.org/cgi-bin/carddisp.pl?gene=COL5A1&amp;keywords=col5a1">https://www.genecards.org/cgi-bin/carddisp.pl?gene=COL5A1&amp;keywords=col5a1</a>                                     |
| <b>Nrp2</b>          | 1.10989    | 5.99E-05 | 0.075648   | 5           |                   | Neuropilin 2 interacts with vascular endothelial growth factor (VEGF). This protein may play a role in c   | <a href="https://www.genecards.org/cgi-bin/carddisp.pl?gene=NRP2&amp;keywords=Nrp2">https://www.genecards.org/cgi-bin/carddisp.pl?gene=NRP2&amp;keywords=Nrp2</a>                                             |
| <b>Fbln2</b>         | 1.0300568  | 4.03E-07 | 0.001885   | 19          | YES               | This gene encodes an extracellular matrix protein, which belongs to the fibulin family. This protein bind  | <a href="https://www.genecards.org/cgi-bin/carddisp.pl?gene=FBLN2&amp;keywords=Fbln2">https://www.genecards.org/cgi-bin/carddisp.pl?gene=FBLN2&amp;keywords=Fbln2</a>                                         |
| <b>Csnk2a2</b>       | 0.9857398  | 1.13E-23 | 3.15E-19   | 20          |                   | Protein kinase CK2 alpha prime. Catalytic subunit of CK2 holoenzyme                                        | <a href="https://www.genecards.org/cgi-bin/carddisp.pl?gene=CSNK2A2&amp;keywords=Csnk2a2">https://www.genecards.org/cgi-bin/carddisp.pl?gene=CSNK2A2&amp;keywords=Csnk2a2</a>                                 |
| <b>Pde1a</b>         | 0.9491691  | 1.06E-05 | 0.022609   | 20          | YES               | Calcium/calmodulin-dependent 3',5'-cyclic nucleotide phosphodiesterase 1A                                  | <a href="https://www.genecards.org/cgi-bin/carddisp.pl?gene=PDE1A&amp;keywords=Pde1a">https://www.genecards.org/cgi-bin/carddisp.pl?gene=PDE1A&amp;keywords=Pde1a</a>                                         |
| <b>Cpne4</b>         | 0.815418   | 2.35E-05 | 0.039975   | 19          | YES               | Calcium-dependent membrane-binding proteins may regulate molecular events at the interface of the c        | <a href="https://www.genecards.org/cgi-bin/carddisp.pl?gene=CPNE4&amp;keywords=Cpne4">https://www.genecards.org/cgi-bin/carddisp.pl?gene=CPNE4&amp;keywords=Cpne4</a>                                         |
| <b>Gm45640</b>       | 0.7899246  | 0.00013  | 0.09839    | 20          |                   | Unknown                                                                                                    |                                                                                                                                                                                                               |
| <b>Ncald</b>         | 0.7531203  | 3.29E-05 | 0.050717   | 5           | YES               | Neuronal calcium-binding protein that belongs to the neuronal calcium sensor (NCS) family of proteins.     | <a href="https://www.genecards.org/cgi-bin/carddisp.pl?gene=NCALD&amp;keywords=Ncald">https://www.genecards.org/cgi-bin/carddisp.pl?gene=NCALD&amp;keywords=Ncald</a>                                         |
| <b>Basp1</b>         | 0.5603242  | 5.57E-05 | 0.073668   | 19          | YES               | Brain Abundant Membrane Attached Signal Protein 1                                                          | <a href="https://www.genecards.org/cgi-bin/carddisp.pl?gene=BASP1&amp;keywords=Basp1">https://www.genecards.org/cgi-bin/carddisp.pl?gene=BASP1&amp;keywords=Basp1</a>                                         |
| <b>Pgm2l1</b>        | 0.5560045  | 2.08E-05 | 0.038578   | 5           |                   | PGM2L1 (Phosphoglucomutase 2 Like 1) is a Protein Coding gene. Among its related pathways are Me           | <a href="https://www.genecards.org/cgi-bin/carddisp.pl?gene=PGM2L1&amp;keywords=Pgm2l1">https://www.genecards.org/cgi-bin/carddisp.pl?gene=PGM2L1&amp;keywords=Pgm2l1</a>                                     |
| <b>Erc1</b>          | 0.399286+D | 1.02E-05 | 0.022609   | 5           | YES               | RIM-binding protein. RIMs are active zone proteins that regulate neurotransmitter release.                 | <a href="https://www.genecards.org/cgi-bin/carddisp.pl?gene=ERC1&amp;keywords=Erc1">https://www.genecards.org/cgi-bin/carddisp.pl?gene=ERC1&amp;keywords=Erc1</a>                                             |
| <b>Ctsd</b>          | -0.4584743 | 9.26E-06 | 0.022609   | 19          |                   | CTSD gene provides instructions for making an enzyme called cathepsin D.                                   | <a href="https://www.genecards.org/cgi-bin/carddisp.pl?gene=CTSD&amp;keywords=Ctsd">https://www.genecards.org/cgi-bin/carddisp.pl?gene=CTSD&amp;keywords=Ctsd</a>                                             |
| <b>Npc2</b>          | -0.4653114 | 4.68E-05 | 0.068443   | 5           |                   | NPC Intracellular Cholesterol Transporter 2, transports cholesterol through the late endosomal/lysosom     | <a href="https://www.genecards.org/cgi-bin/carddisp.pl?gene=NPC2&amp;keywords=Npc2">https://www.genecards.org/cgi-bin/carddisp.pl?gene=NPC2&amp;keywords=Npc2</a>                                             |
| <b>Elovl7</b>        | -0.7269098 | 0.000135 | 0.09839    | 20          |                   | Fatty Acid Elongase 7. Among its related pathways are Fatty Acyl-CoA Biosynthesis and Metabolism           | <a href="https://www.genecards.org/cgi-bin/carddisp.pl?gene=ELOVL7&amp;keywords=Elovl7">https://www.genecards.org/cgi-bin/carddisp.pl?gene=ELOVL7&amp;keywords=Elovl7</a>                                     |
| <b>Tcn2</b>          | -0.7635684 | 6.45E-05 | 0.077457   | 19          |                   | Transcobalamin II (TC II), a plasma globulin that acts as the primary transport protein for vitamin B12    | <a href="https://www.genecards.org/cgi-bin/carddisp.pl?gene=TCN2&amp;keywords=Tcn2">https://www.genecards.org/cgi-bin/carddisp.pl?gene=TCN2&amp;keywords=Tcn2</a>                                             |
| <b>Rtraf-ps</b>      | -0.8885925 | 0.000132 | 0.09839    | 20          |                   | RNA transcription, translation and transport factor, pseudogene                                            |                                                                                                                                                                                                               |
| <b>BC067074</b>      | -0.9301093 | 1.78E-06 | 0.070706   | 20          |                   | Unknown                                                                                                    |                                                                                                                                                                                                               |
| <b>Lyz2</b>          | -1.0403831 | 5.40E-05 | 0.073668   | 20          |                   | antibacterial enzyme lysozyme M (LysM)                                                                     | <a href="https://www.genecards.org/cgi-bin/carddisp.pl?gene=LYZ2&amp;keywords=Lyz2">https://www.genecards.org/cgi-bin/carddisp.pl?gene=LYZ2&amp;keywords=Lyz2</a>                                             |
| <b>Klf4</b>          | -1.136359  | 7.75E-05 | 0.081402   | 20          |                   | Kruppel-like factor 4 is a member of the KLF family of zinc finger transcription factors, which belongs to | <a href="https://www.genecards.org/cgi-bin/carddisp.pl?gene=KLF4&amp;keywords=Klf4">https://www.genecards.org/cgi-bin/carddisp.pl?gene=KLF4&amp;keywords=Klf4</a>                                             |
| <b>Slc18a3</b>       | -1.1761844 | 1.89E-05 | 0.037482   | 20          | YES               | Solute Carrier Family 18 (Vesicular Acetylcholine Transporter), Member 3                                   | <a href="https://www.genecards.org/cgi-bin/carddisp.pl?gene=SLC18A3&amp;keywords=Slc18a3">https://www.genecards.org/cgi-bin/carddisp.pl?gene=SLC18A3&amp;keywords=Slc18a3</a>                                 |
| <b>Gm2991</b>        | -1.6784161 | 0.00012  | 0.09839    | 20          |                   | Unknown                                                                                                    |                                                                                                                                                                                                               |
| <b>Gm42047</b>       | -2.5858568 | 6.38E-06 | 0.019685   | 20          |                   | lncRNA                                                                                                     |                                                                                                                                                                                                               |
| <b>Tmem88</b>        | -3.1280924 | 8.20E-05 | 0.081402   | 9           | YES               | Transmembrane protein 88 Inhibits the Wnt/beta-catenin signaling pathway                                   | <a href="https://www.genecards.org/cgi-bin/carddisp.pl?gene=TMEM88&amp;keywords=Tmem88">https://www.genecards.org/cgi-bin/carddisp.pl?gene=TMEM88&amp;keywords=Tmem88</a>                                     |
| <b>4933406B1Rik</b>  | -3.7325491 | 9.85E-11 | 9.26E-07   | 20          |                   | Long non coding RNA associated with Csnk2a2 promoter regulation                                            | <a href="http://useast.ensembl.org/Mus_musculus/Gene/Summary?db=core;g=ENSMUSG00000110427;r=8:95496430-9">http://useast.ensembl.org/Mus_musculus/Gene/Summary?db=core;g=ENSMUSG00000110427;r=8:95496430-9</a> |
| <b>Ttr</b>           | -6.9107612 | 9.50E-05 | 0.085158   | 13          |                   | Transthyretin. This protein transports vitamin A (retinol) and a hormone called thyroxine throughout the   | <a href="https://www.genecards.org/cgi-bin/carddisp.pl?gene=TTR&amp;keywords=Ttr">https://www.genecards.org/cgi-bin/carddisp.pl?gene=TTR&amp;keywords=Ttr</a>                                                 |
