# Supplementary material for: CK2 alpha prime and alpha-synuclein pathogenic functional interaction mediates synaptic dysregulation in Huntington’s disease
Source: bioRxiv or medRxiv preprint supplement (doi:10.1101/2020.10.29.359380), 2022-01-27
Supplement: Supplementary file [file media-2.pdf]

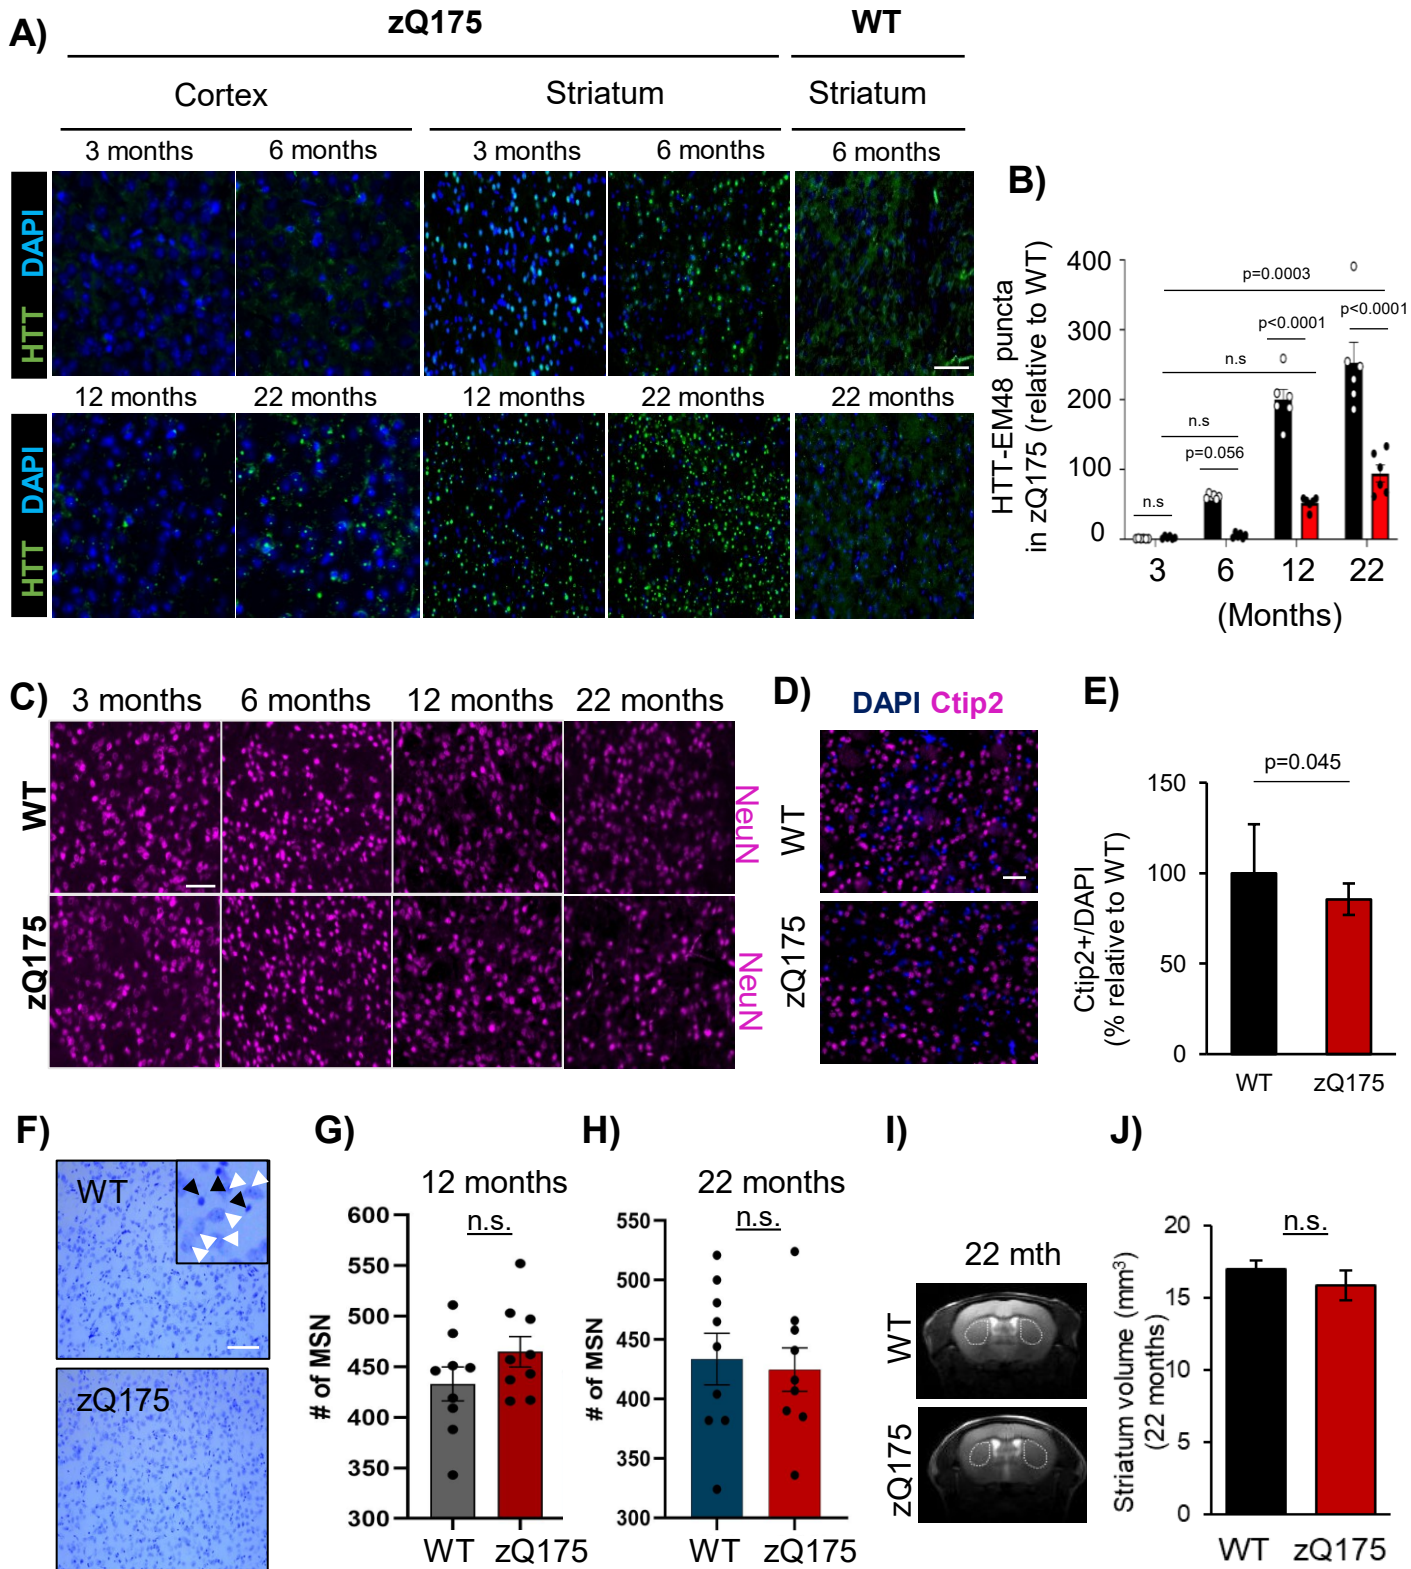

**Figure S1**

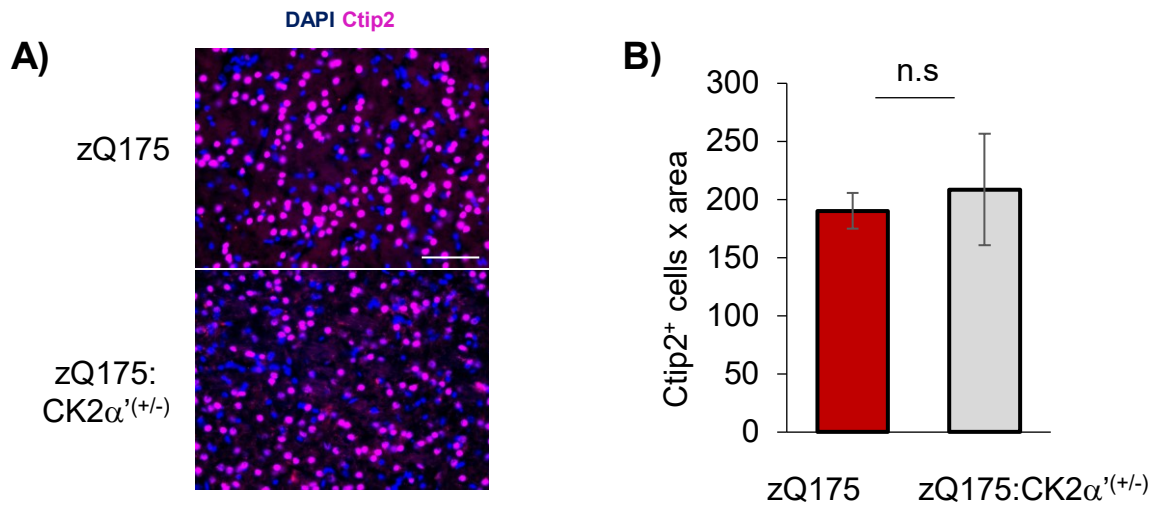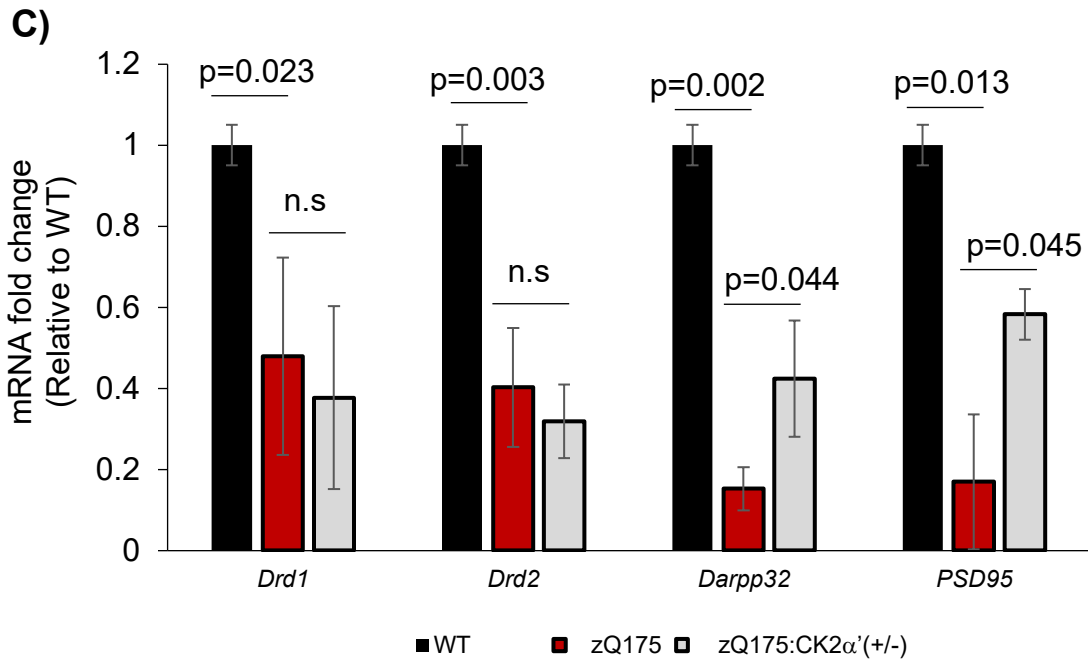

**Figure S2**

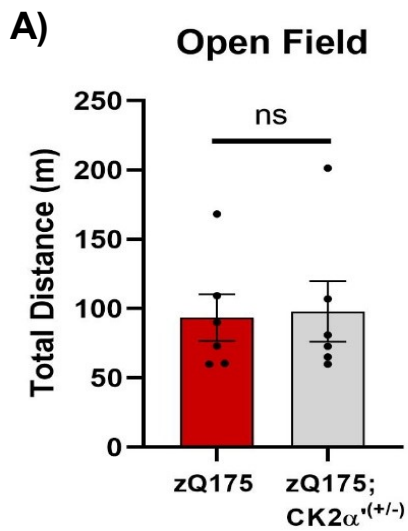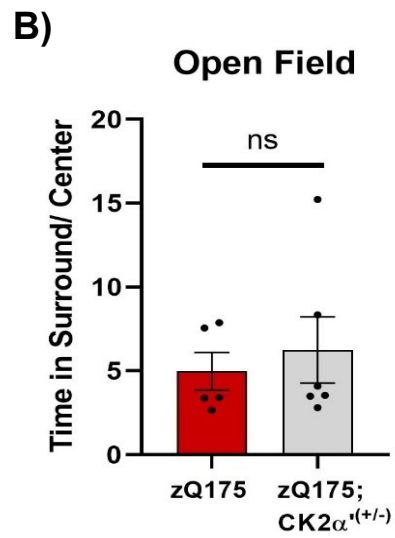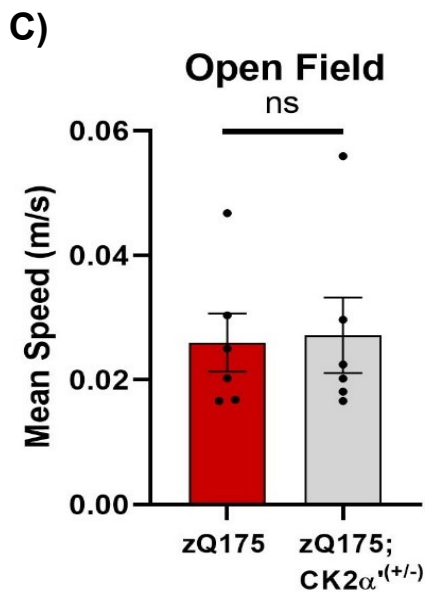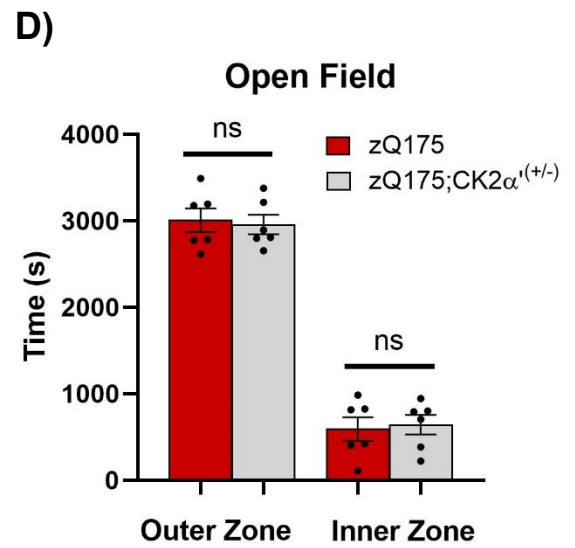

**E) Trace Maps**

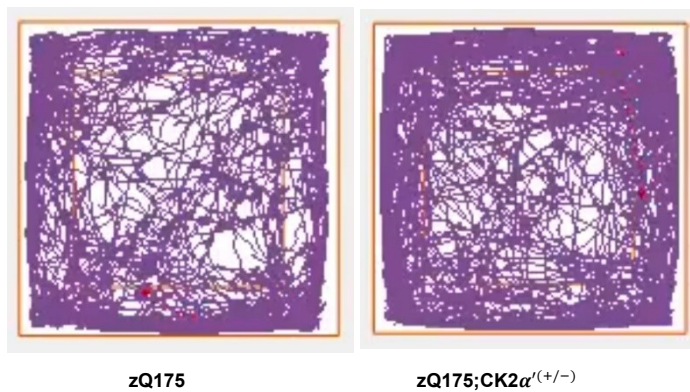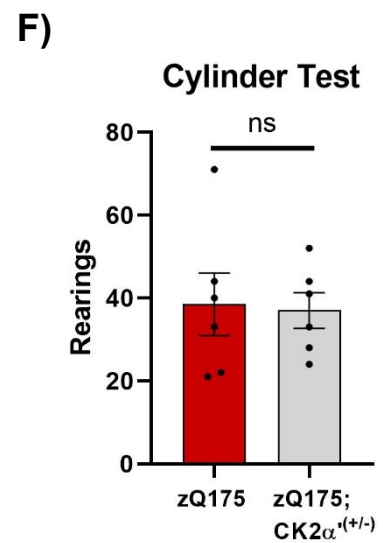

**Figure S3**

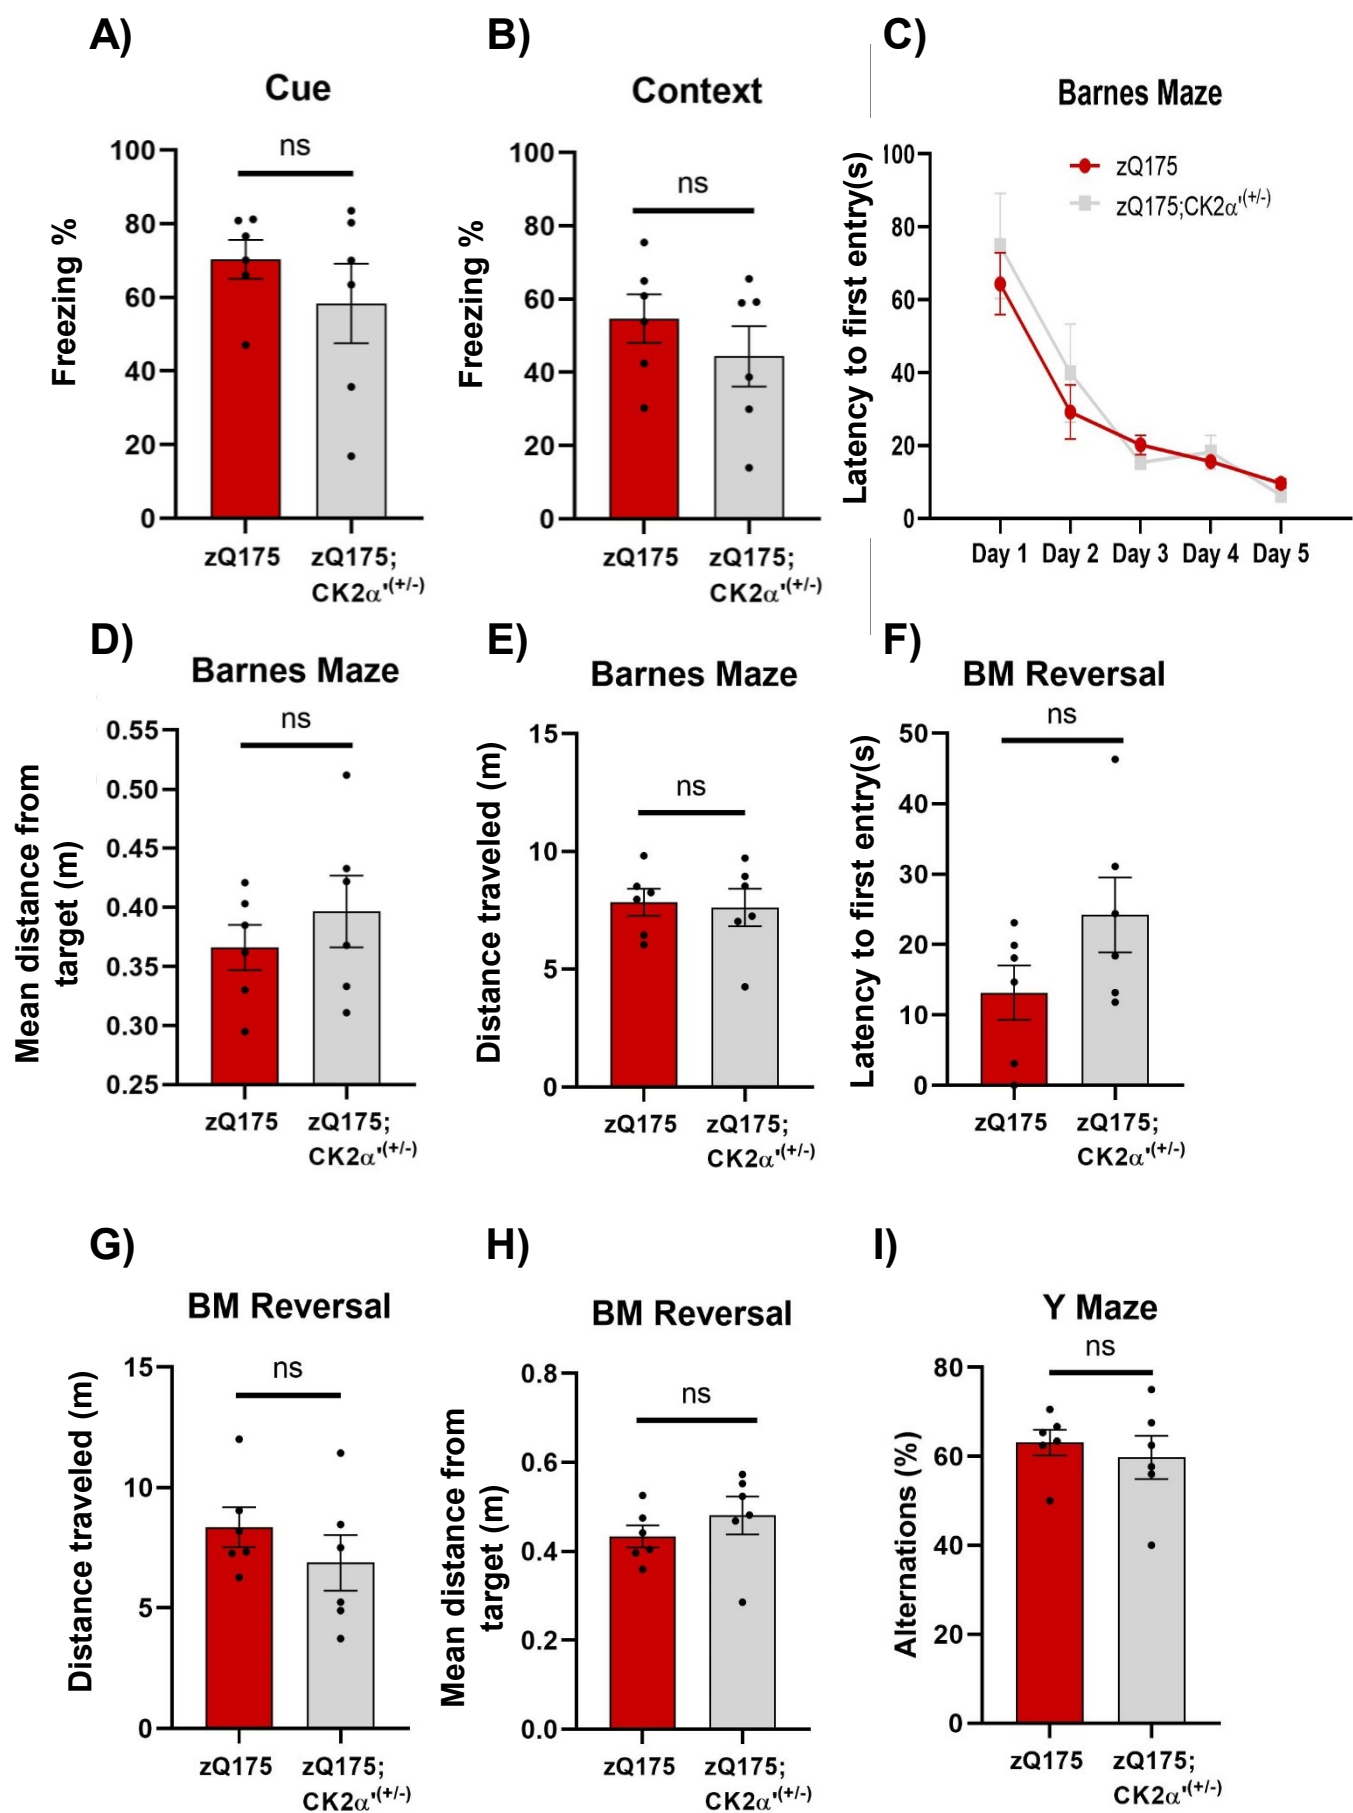

**Figure S4**

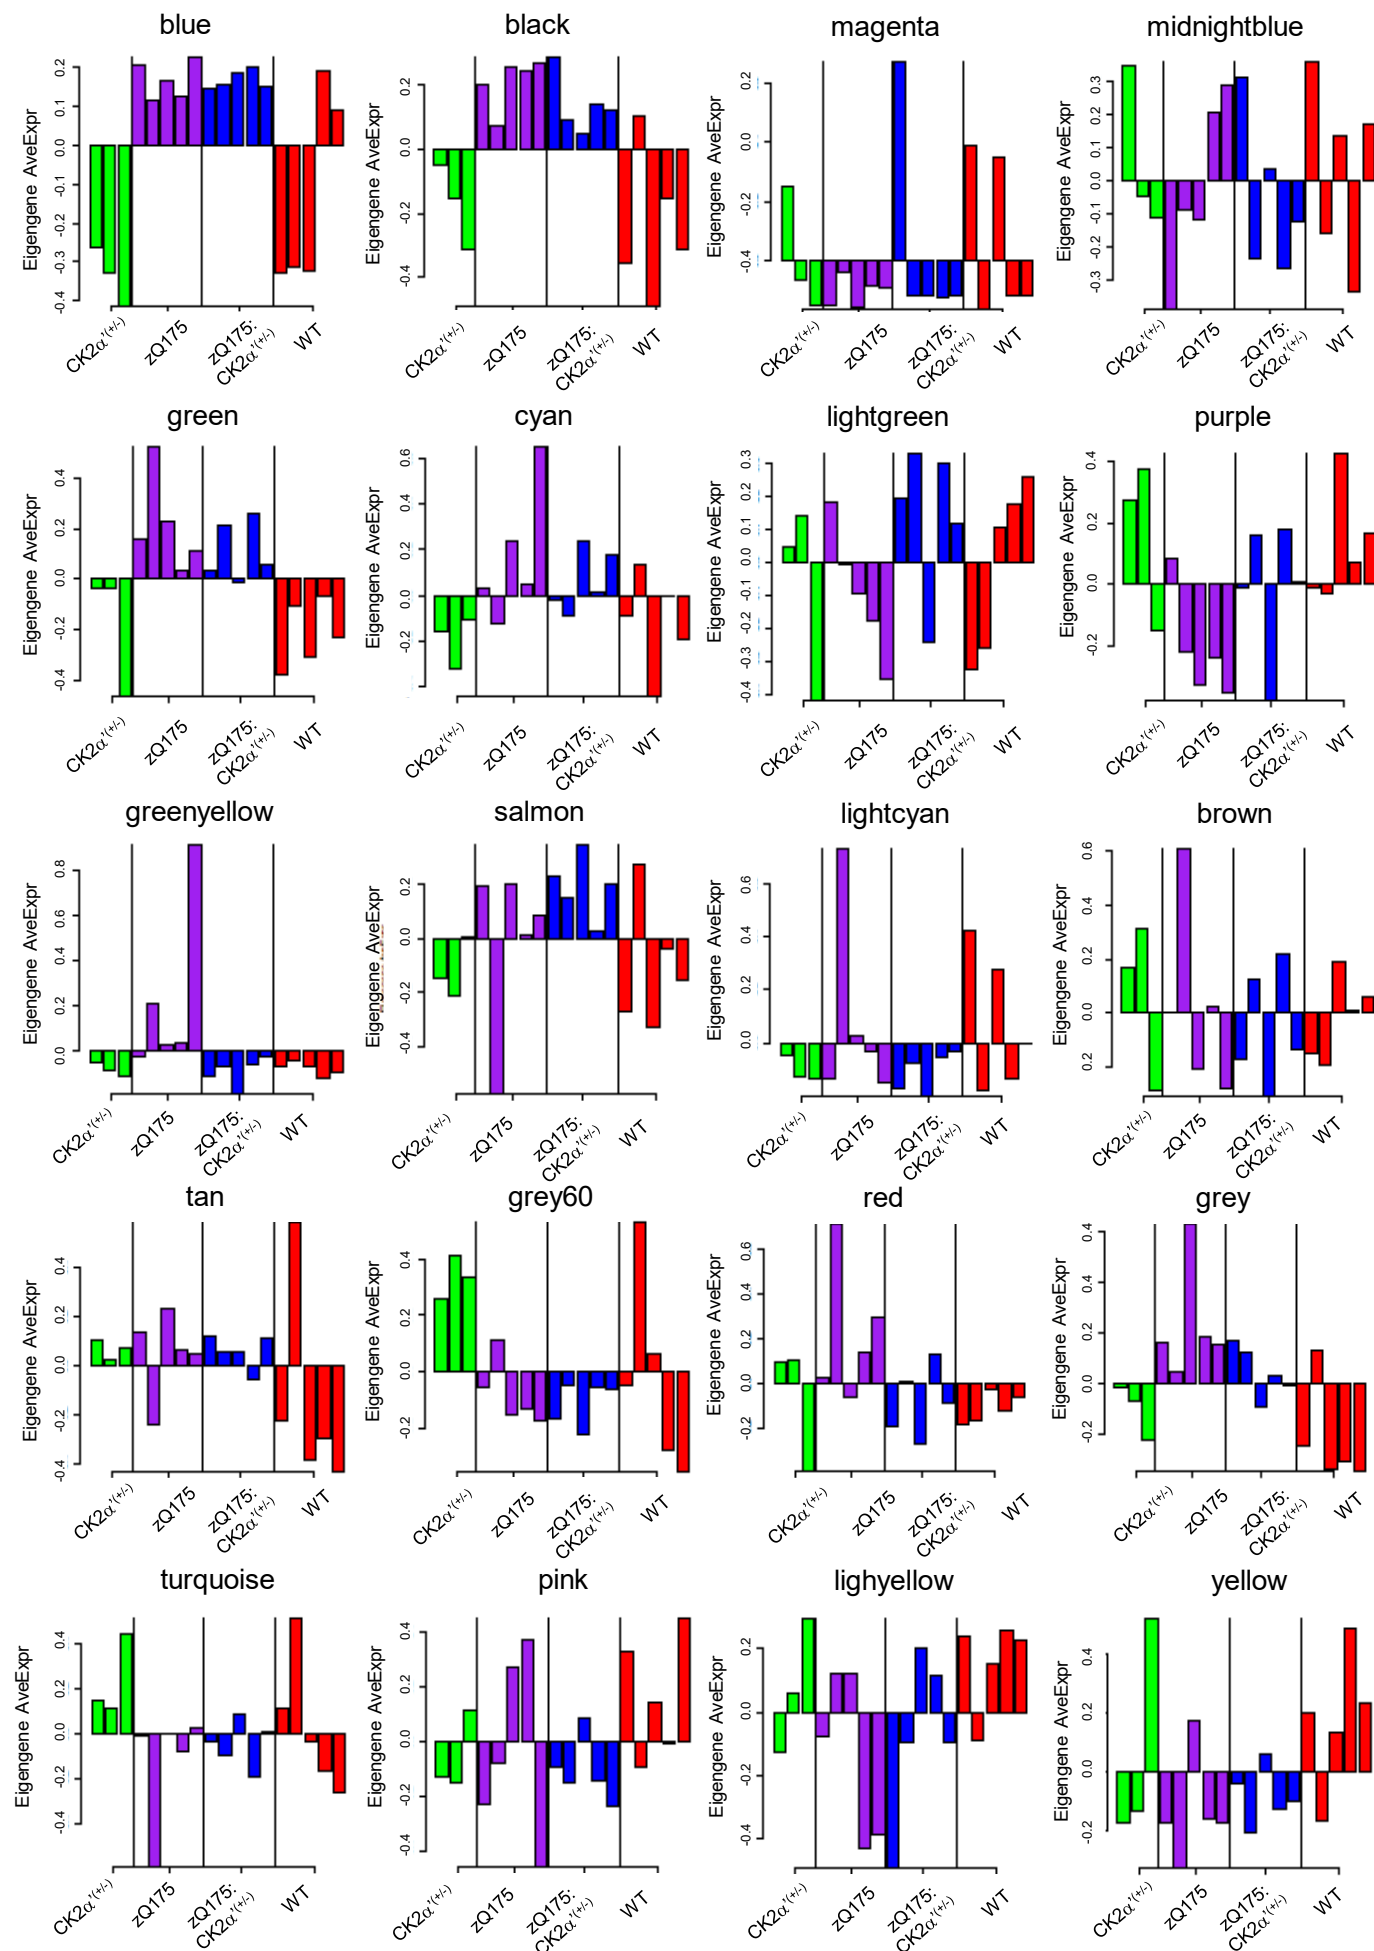

**Figure S5**

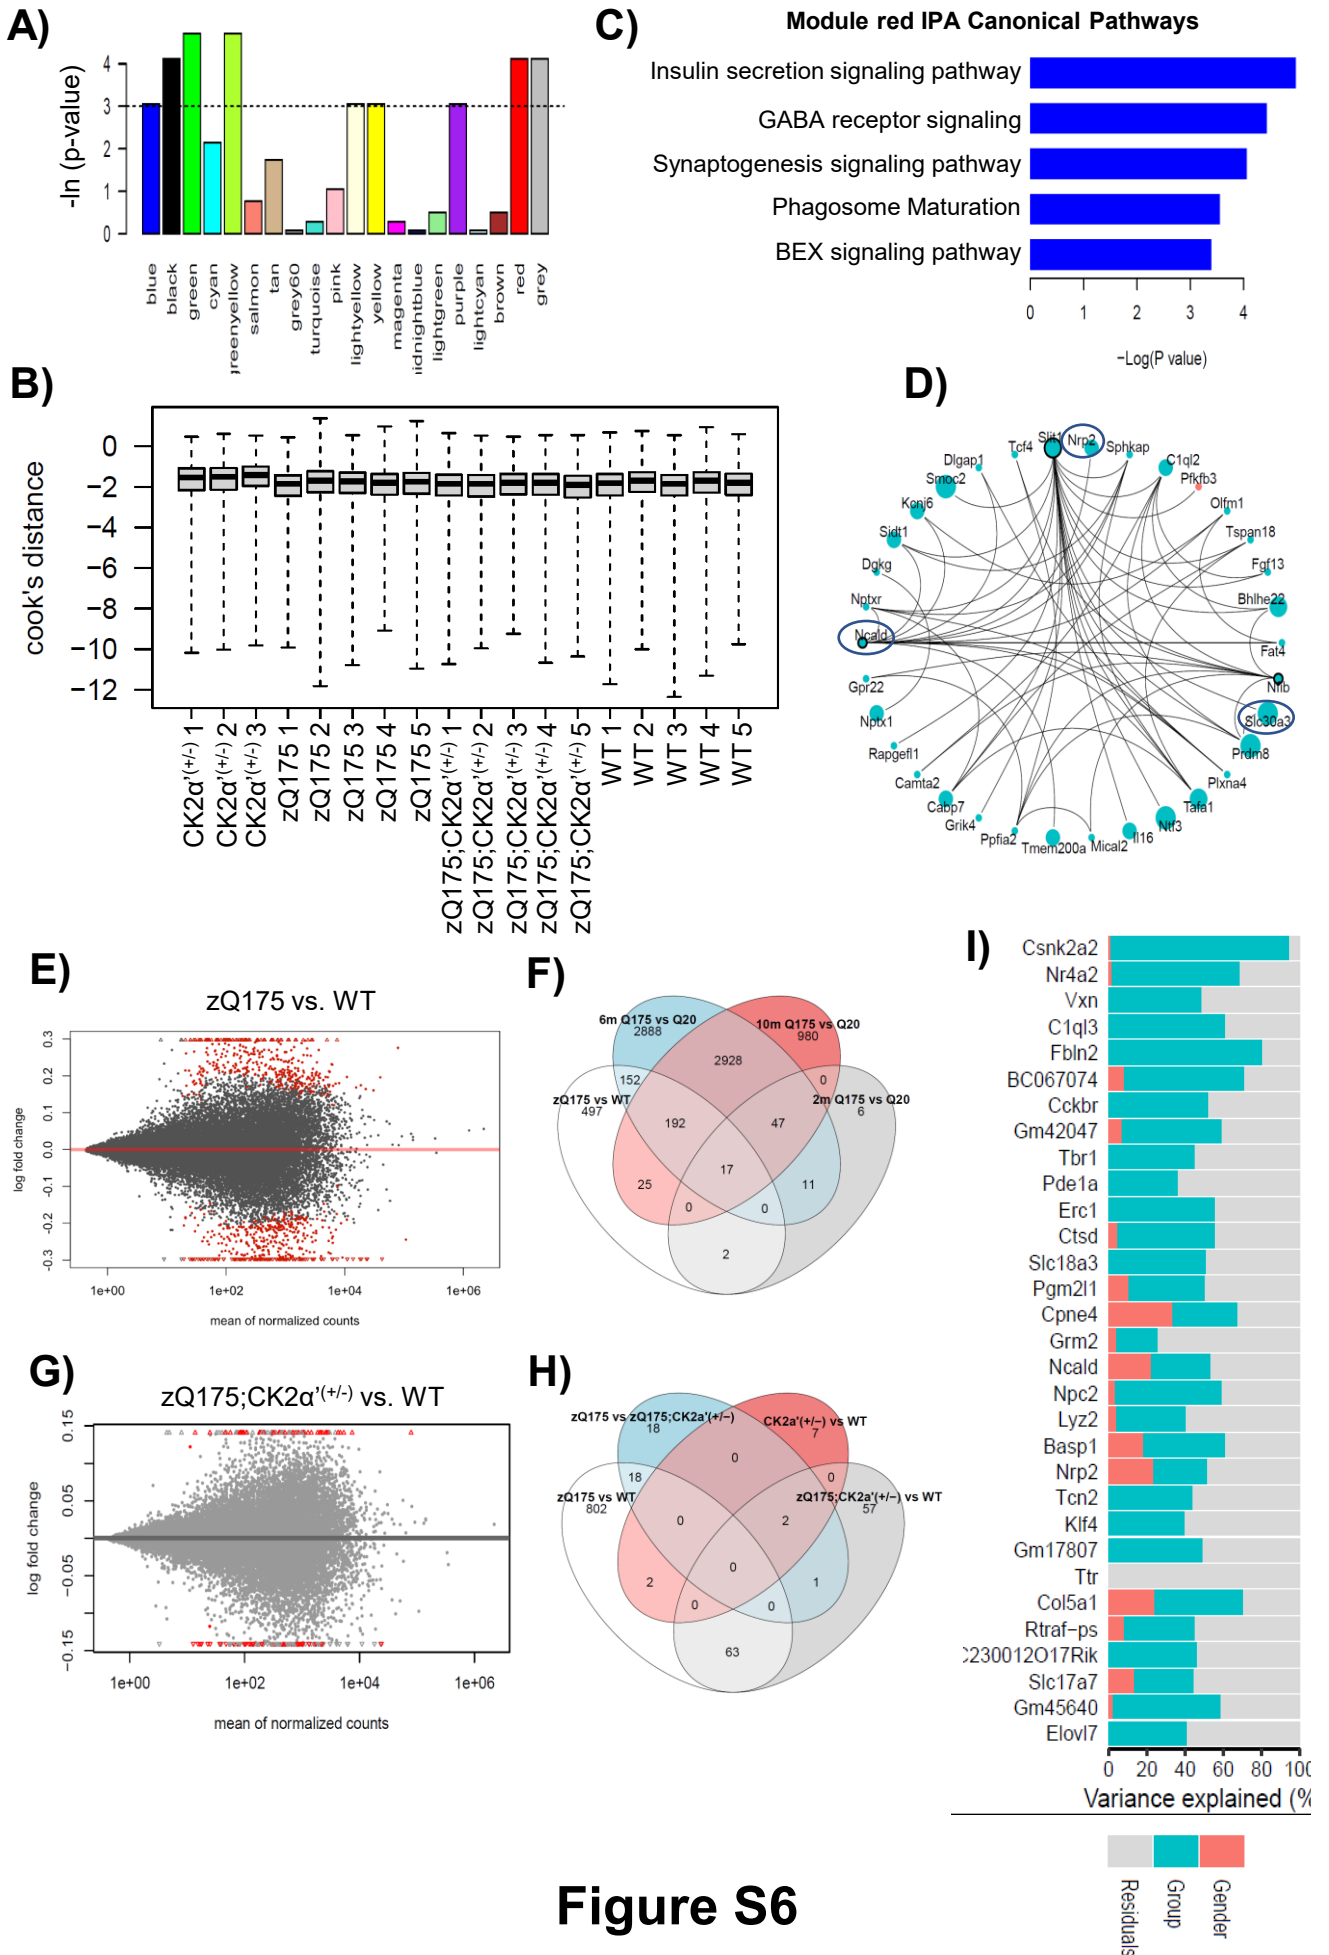

**Figure S6**

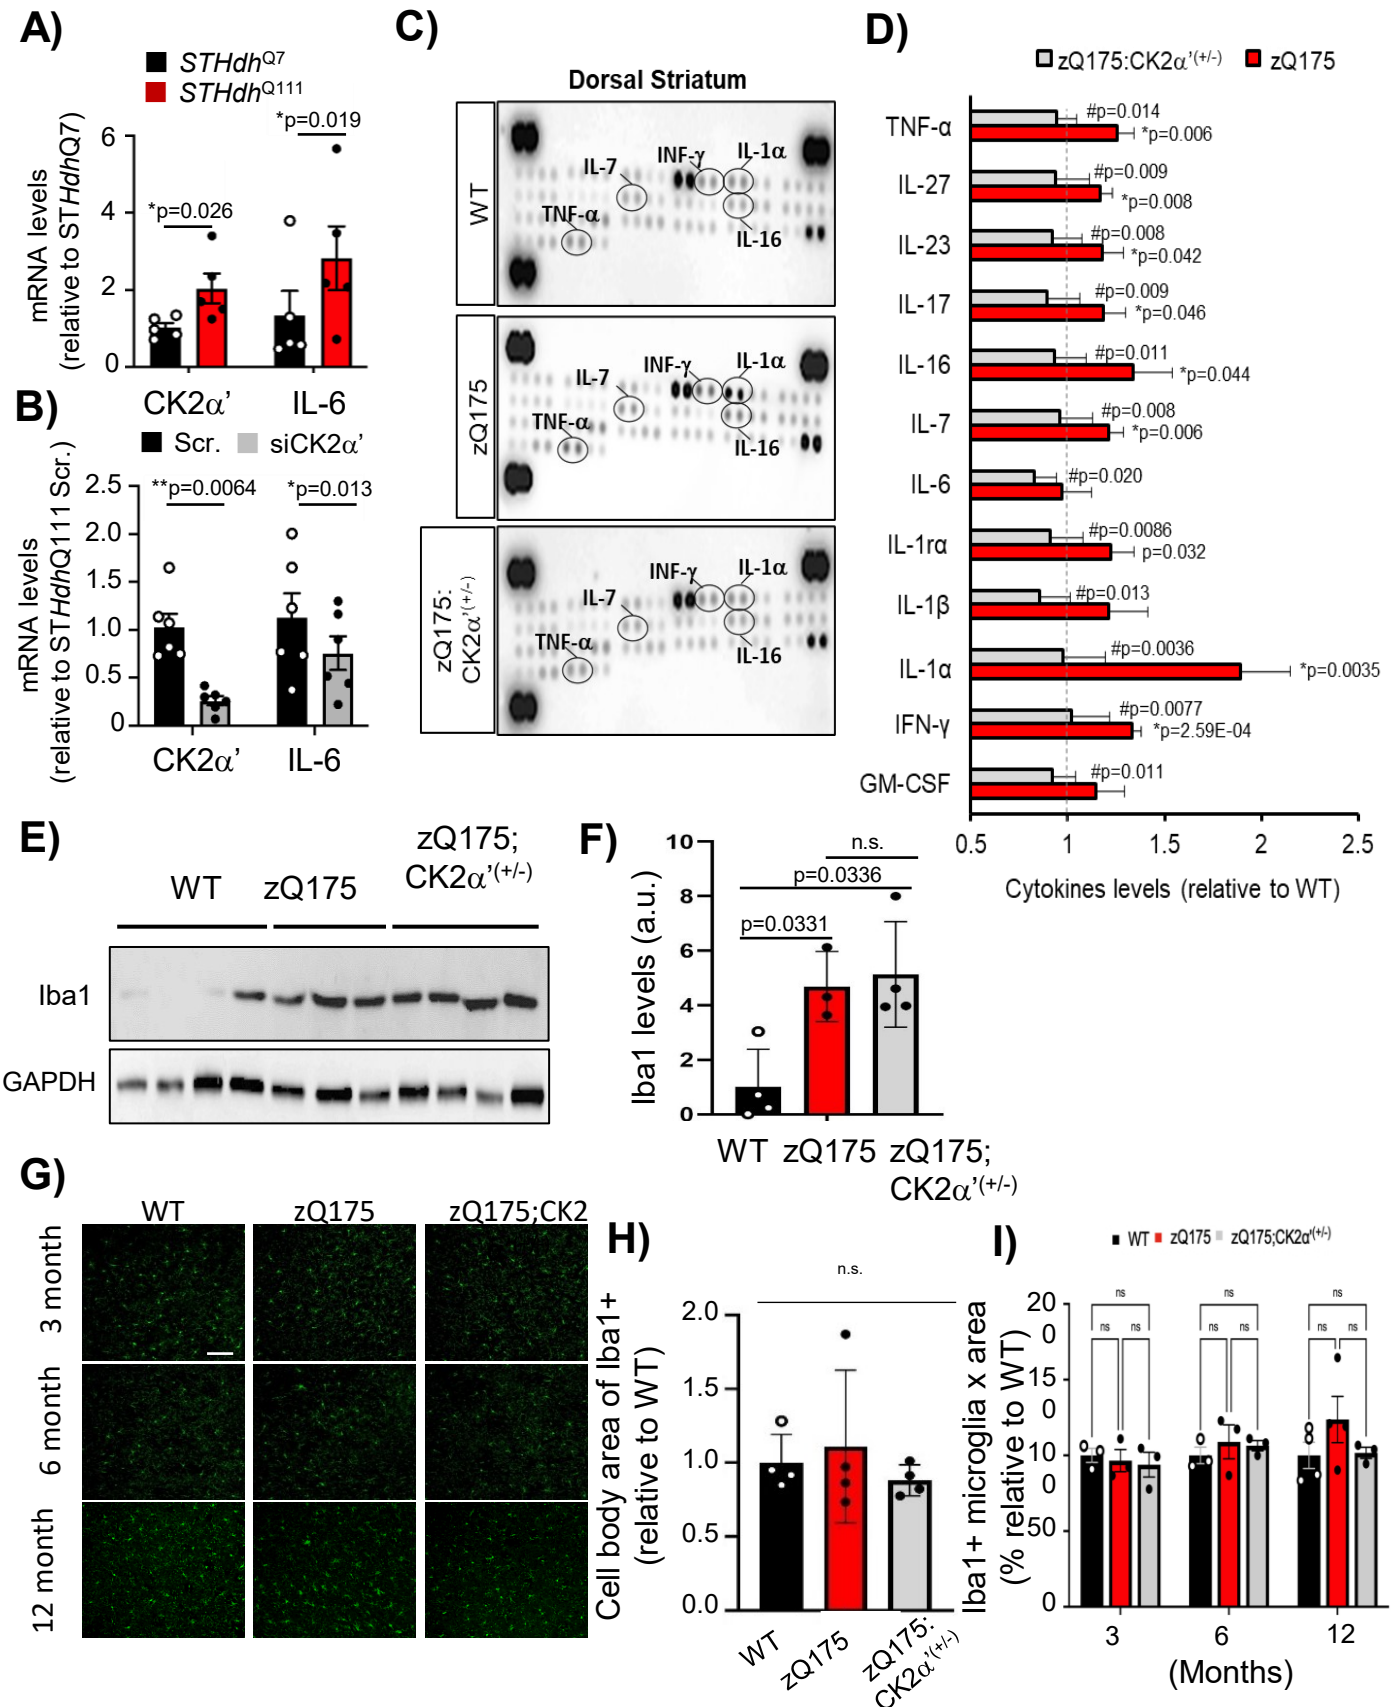

**Figure S7**

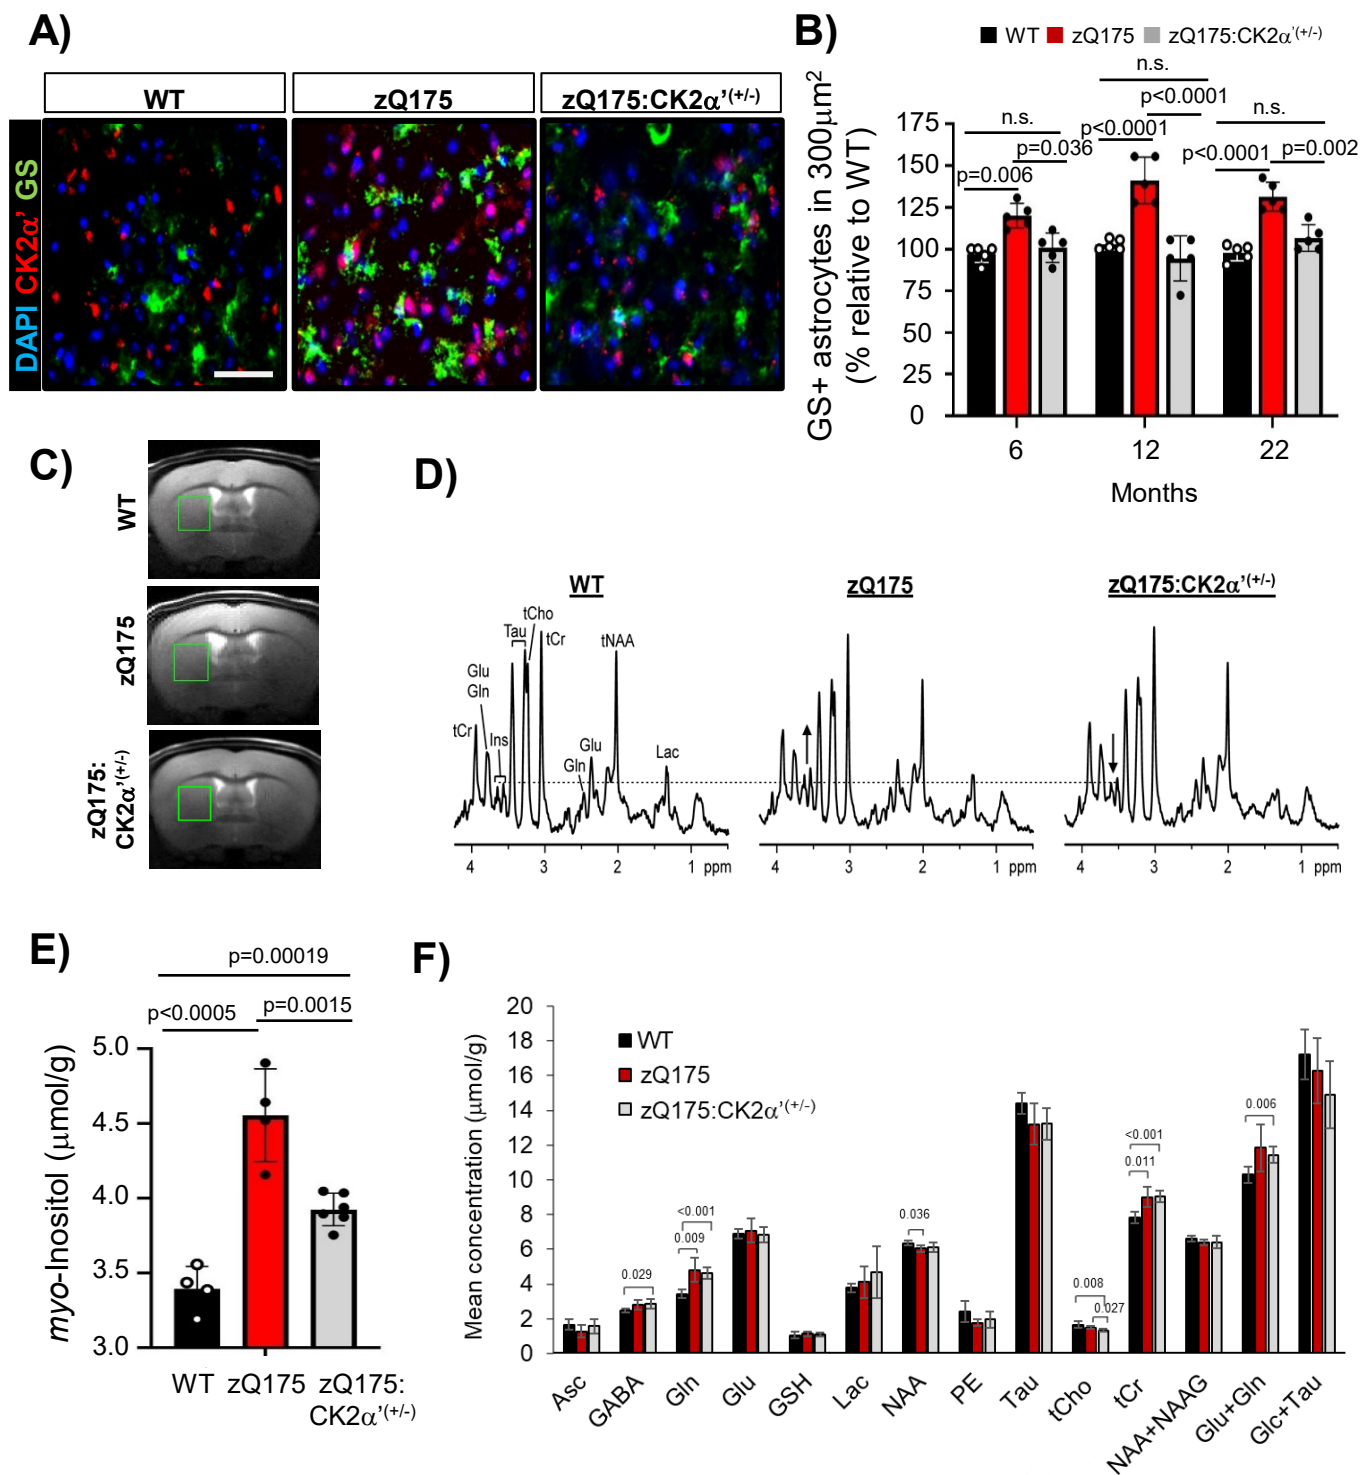

**Figure S8**



**A)**

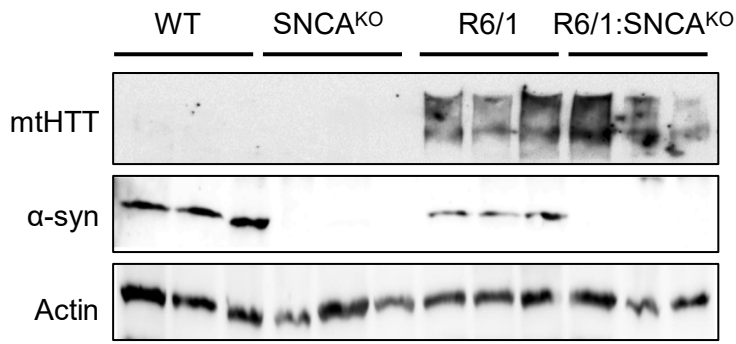

**B)**

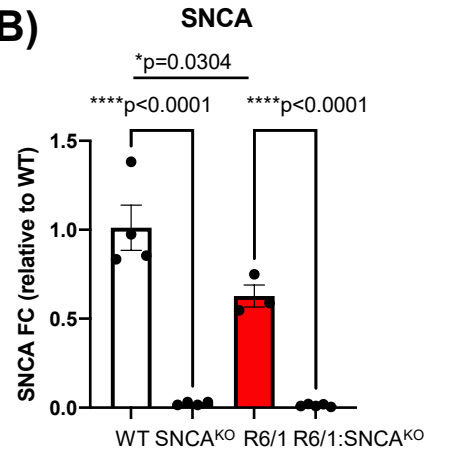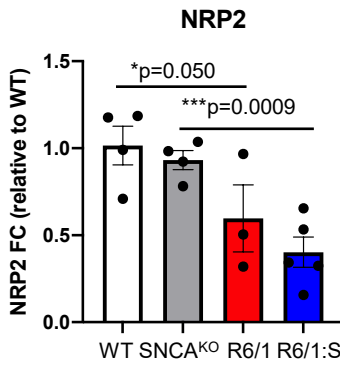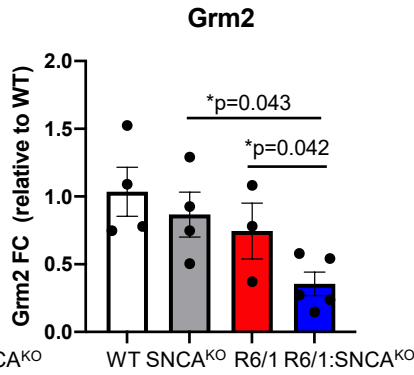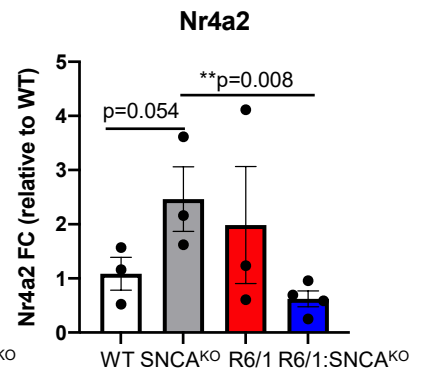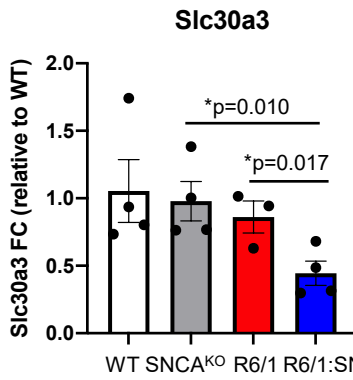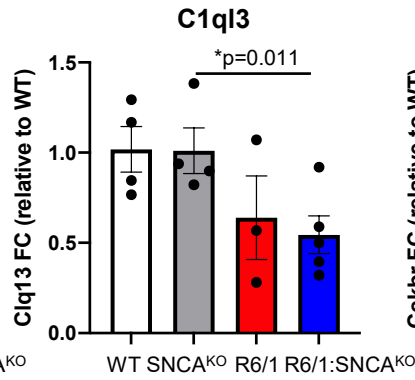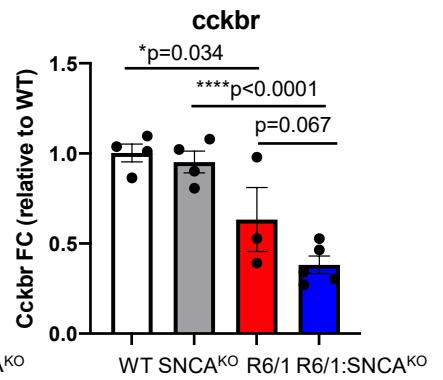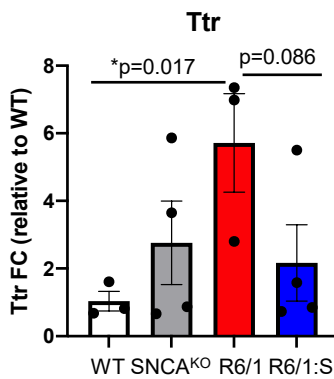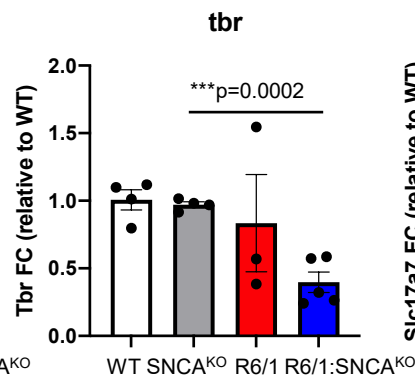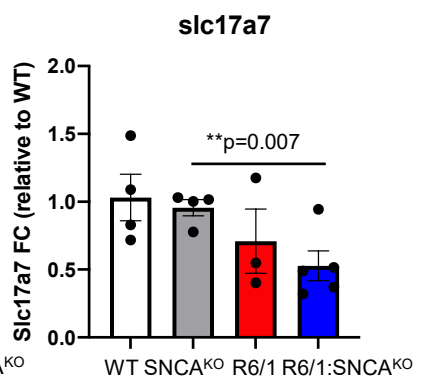

**Figure S9**

**A)**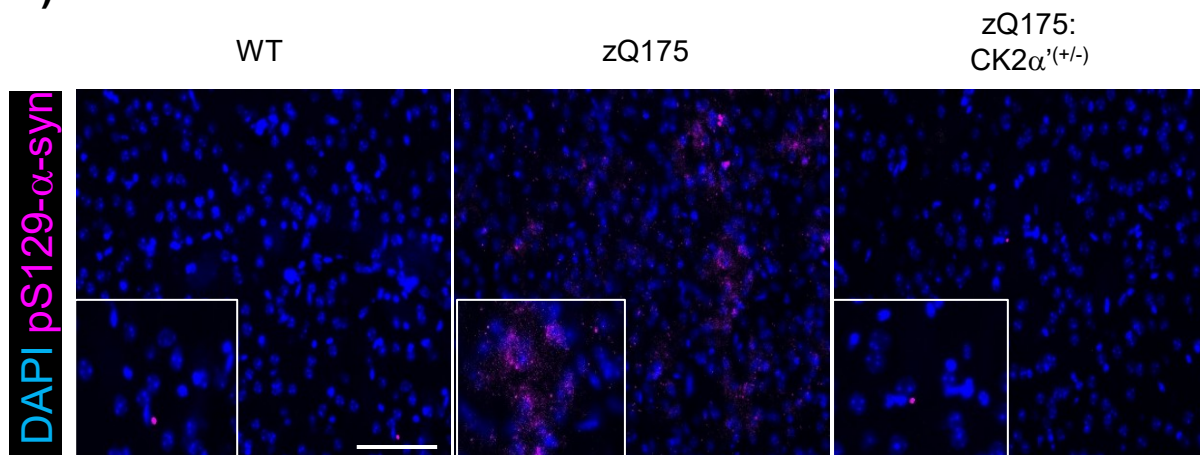**B)**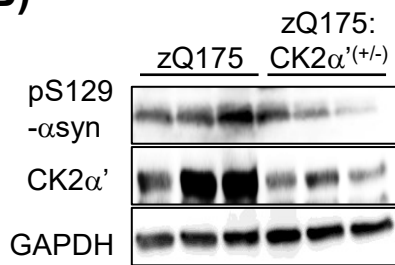**C)**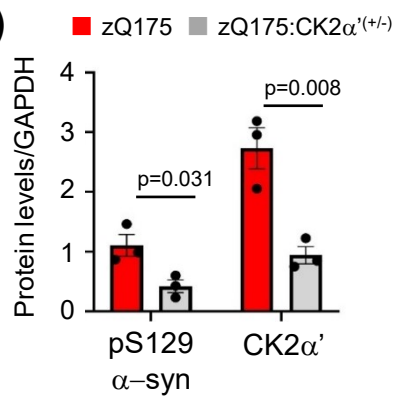**Figure S10**
